# Supplementary material for: mitoBKCa is functionally expressed in murine and human breast cancer cells and potentially contributes to metabolic reprogramming
Source: PubMed Central journal article supplement (PMC11136494; doi:10.7554/elife.92511), 2024-05-29
Supplement: elife-92511-fig5-figsupp1-data2.pdf [file elife-92511-fig5-figsupp1-data2.pdf]

L H C P P C H L

1  
2  
3  
4  
5  
6  
7  
8  
9  
10  
11  
12

1  
2  
3  
4  
5  
6  
7  
8  
9  
10  
11  
12

1  
2  
3  
4  
5  
6  
7  
8  
9  
10  
11  
12

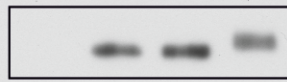

Ant: - TMX1

Ant: COX IV
