# Supplementary material for: mitoBKCa is functionally expressed in murine and human breast cancer cells and potentially contributes to metabolic reprogramming
Source: PubMed Central journal article supplement (PMC11136494; doi:10.7554/elife.92511), 2024-05-29

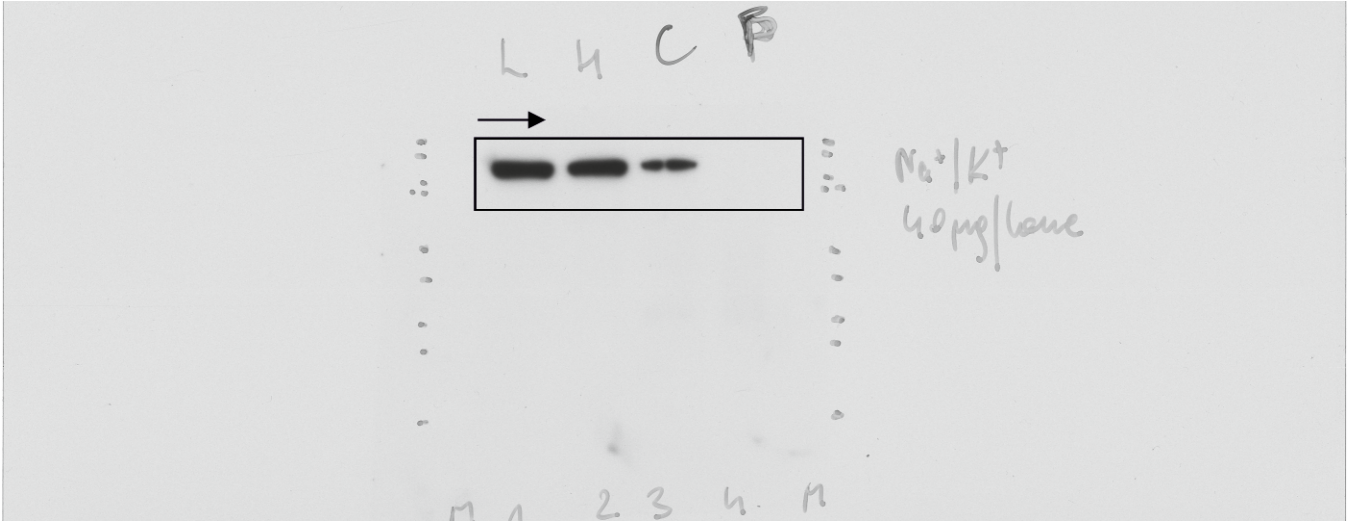

Supplement: elife-92511-fig5-figsupp1-data4.pdf [file elife-92511-fig5-figsupp1-data4.pdf]
