# Supplementary material for: mitoBKCa is functionally expressed in murine and human breast cancer cells and potentially contributes to metabolic reprogramming
Source: eLife journal article supplement (doi:10.7554/elife.92511), 2023-12-08

L H C P P C H L

100  
80  
60  
40  
20  
0

100  
80  
60  
40  
20  
0

100  
80  
60  
40  
20  
0

Ant: - TNF $\alpha$

Ant: COX IV

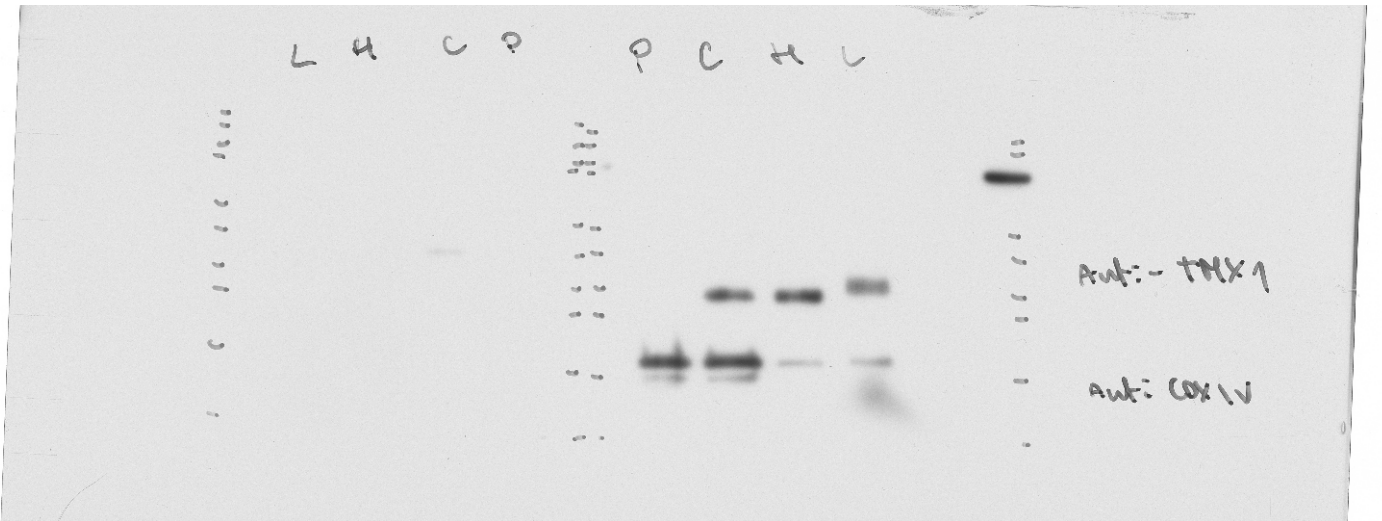

Supplement: fig5-figsupp1-data1 [file elife-92511-fig5-figsupp1-data1-v1.pdf]
