# Supplementary material for: mitoBKCa is functionally expressed in murine and human breast cancer cells and potentially contributes to metabolic reprogramming
Source: eLife journal article supplement (doi:10.7554/elife.92511), 2023-12-08

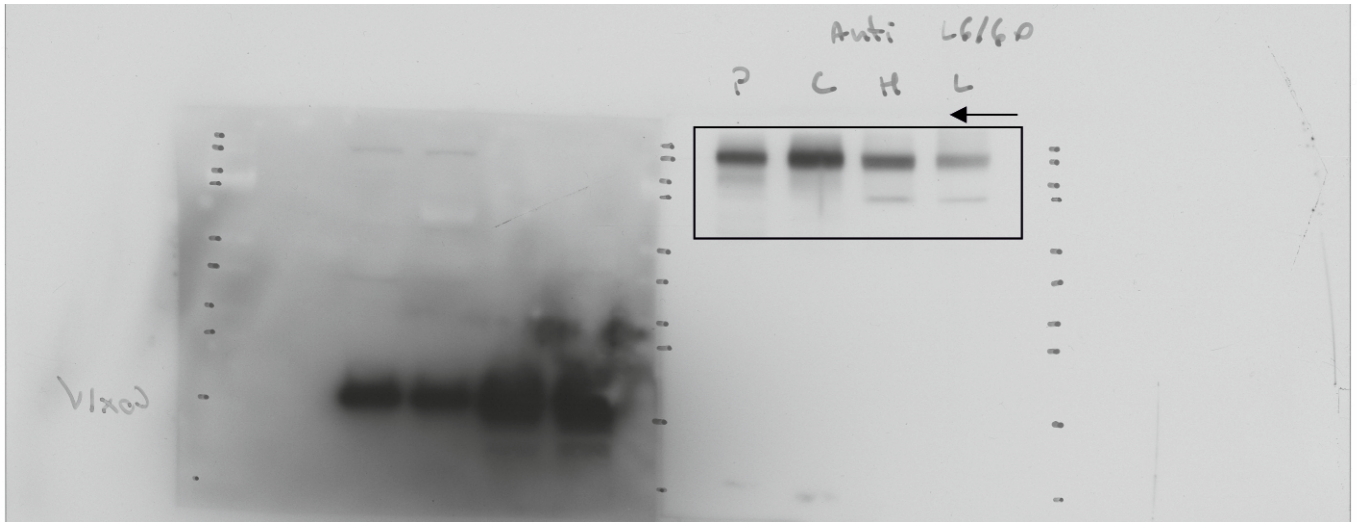

Supplement: fig5-figsupp1-data6 [file elife-92511-fig5-figsupp1-data6-v1.pdf]
