# Supplementary material for: mitoBKCa is functionally expressed in murine and human breast cancer cells and potentially contributes to metabolic reprogramming
Source: eLife. 2024 May 29;12:RP92511. doi: 10.7554/eLife.92511 (PMC11136494; doi:10.7554/eLife.92511)
Supplement: Figure 1—figure supplement 1—source data 1. [file elife-92511-fig1-figsupp1-data1.xlsx]

## Sheet: Fig.S1A
	MMTV-PyMT WT
Time (sec)	ctrl	+ PAX	+ IBTX
0	-0.0269633	-0.0114803	0.017632
0.0002	-0.0270932	-0.0113904	0.0173591
0.0004	-0.0266355	-0.0105265	0.0187238
0.0006	-0.0269757	-0.0111357	0.0171225
0.0008	-0.0267345	-0.0113555	0.0173045
0.001	-0.0268149	-0.0117999	0.0179232
0.0012	-0.0267221	-0.0119098	0.0172317
0.0014	-0.0267654	-0.01169	0.0179414
0.0016	-0.026654	-0.0120096	0.0183963
0.0018	-0.0268025	-0.0122293	0.0176866
0.002	-0.0268953	-0.0117	0.017723
0.0022	-0.0268644	-0.0124191	0.0189239
0.0024	-0.0270437	-0.0120496	0.0173045
0.0026	-0.0265984	-0.0113654	0.0174319
0.0028	-0.0268334	-0.0109859	0.0180505
0.003	-0.0274891	-0.0108661	0.0171771
0.0032	-0.0270747	-0.0106613	0.017723
0.0034	-0.0271922	-0.0108411	0.0191605
0.0036	-0.0270066	-0.00985239	0.0170316
0.0038	-0.027118	-0.0102519	0.01856
0.004	-0.027186	-0.0104566	0.0183963
0.0042	-0.026852	-0.0107812	0.0173409
0.0044	-0.0270623	-0.0108511	0.0183235
0.0046	-0.027384	-0.0107363	0.0181233
0.0048	-0.0273963	-0.010941	0.0179596
0.005	-0.0271736	-0.0106064	0.0178322
0.0052	-0.0274273	-0.0114953	0.0179596
0.0054	-0.0272974	-0.0106014	0.0170316
0.0056	-0.0272912	-0.0102769	0.0177412
0.0058	-0.0274396	-0.0110209	0.0174865
0.006	-0.0272602	-0.0110409	0.0182507
0.0062	-0.027551	-0.0110209	0.0183781
0.0064	-0.0271303	-0.0111557	0.0178686
0.0066	-0.0272788	-0.0104516	0.0171043
0.0068	-0.0274149	-0.0110758	0.0178868
0.007	-0.0274396	-0.011755	0.0182507
0.0072	-0.0276499	-0.010961	0.0171953
0.0074	-0.0274211	-0.0115352	0.0186692
0.0076	-0.027452	-0.0115402	0.0176138
0.0078	-0.0273778	-0.0115452	0.0186874
0.008	-0.0274582	-0.0117649	0.0183781
0.0082	-0.0273963	-0.0119297	0.0170134
0.0084	-0.0276376	-0.0114503	0.0178322
0.0086	-0.0275262	-0.0122543	0.0187056
0.0088	-0.0274396	-0.0116501	0.0180505
0.009	-0.0275881	-0.0118049	0.018742
0.0092	-0.02752	-0.0112955	0.0178322
0.0094	-0.027384	-0.0108861	0.0184327
0.0096	-0.0273468	-0.0105315	0.0186874
0.0098	-0.0273778	-0.0104466	0.0177594
0.01	-0.0271118	-0.0101071	0.0186692
0.0102	-0.0273283	-0.0100971	0.0181415
0.0104	-0.0273778	-0.0114653	0.0180687
0.0106	-0.0273654	-0.0113205	0.0170316
0.0108	-0.0276994	-0.0108112	0.0182325
0.011	-0.0274149	-0.0110758	0.0181961
0.0112	-0.027118	-0.0104117	0.0189967
0.0114	-0.0276066	-0.0106913	0.0191969
0.0116	-0.0274767	-0.0105865	0.0173045
0.0118	-0.0274025	-0.0107512	0.018742
0.012	-0.027817	-0.0107263	0.0184509
0.0122	-0.027817	-0.010172	0.0180323
0.0124	-0.0275386	-0.0107862	0.0182871
0.0126	-0.0277427	-0.0107263	0.0182325
0.0128	-0.0275881	-0.010926	0.0188512
0.013	-0.0271242	-0.0114204	0.019761
0.0132	-0.0273159	-0.0117649	0.0164675
0.0134	-0.0275695	-0.0111857	0.0173227
0.0136	-0.0272169	-0.0118348	0.0180141
0.0138	-0.0275015	-0.0121295	0.0182143
0.014	-0.0270128	-0.0112656	0.0182689
0.0142	-0.0273901	-0.0118698	0.0182143
0.0144	-0.0272108	-0.0117749	0.0174137
0.0146	-0.0270747	-0.0117649	0.0183053
0.0148	-0.0270437	-0.0115752	0.0180141
0.015	-0.0273221	-0.0120596	0.017996
0.0152	-0.0267592	-0.0120346	0.0189422
0.0154	-0.027087	-0.0123842	0.0178868
0.0156	-0.0269324	-0.0123742	0.0187784
0.0158	-0.027087	-0.0119247	0.0188148
0.016	-0.0273035	-0.0117949	0.0184691
0.0162	-0.0270561	-0.0116101	0.0182507
0.0164	-0.026654	-0.0111058	0.0190149
0.0166	-0.026951	-0.0114703	0.0181415
0.0168	-0.0268767	-0.0111907	0.0183235
0.017	-0.0267778	-0.0112107	0.0185236
0.0172	-0.0266788	-0.0112706	0.0177412
0.0174	-0.0267901	-0.0111607	0.0178504
0.0176	-0.0265551	-0.0113505	0.0185418
0.0178	-0.0267221	-0.0115202	0.0178686
0.018	-0.0267407	-0.0112206	0.017632
0.0182	-0.0268211	-0.0107263	0.0188512
0.0184	-0.02692	-0.0105865	0.0172135
0.0186	-0.0267963	-0.0107962	0.0179778
0.0188	-0.0265551	-0.0110858	0.0173955
0.019	-0.0268273	-0.0107163	0.0184509
0.0192	-0.0270128	-0.0105415	0.0176866
0.0194	-0.0268334	-0.0104766	0.0186874
0.0196	-0.0267407	-0.0112057	0.0173045
0.0198	-0.0267592	-0.0110508	0.0186874
0.02	-0.0269943	-0.0116801	0.0175228
0.0202	-0.0268458	-0.0112556	0.016977
0.0204	-0.0268211	-0.0104267	0.019397
0.0206	-0.0264066	-0.0105565	0.0179596
0.0208	-0.0269819	-0.0107662	0.0189239
0.021	-0.026518	-0.0104117	0.0173045
0.0212	-0.0267097	-0.0109011	0.0172863
0.0214	-0.0266293	-0.0111258	0.0171771
0.0216	-0.0265551	-0.0109011	0.0183417
0.0218	-0.0266912	-0.0111657	0.0166494
0.022	-0.0266355	-0.0111607	0.0186328
0.0222	-0.026852	-0.010906	0.0179596
0.0224	-0.0266293	-0.010971	0.016977
0.0226	-0.0266107	-0.0113505	0.0173045
0.0228	-0.0267716	-0.0108761	0.016977
0.023	-0.0273035	-0.0113654	0.0177048
0.0232	-0.0266107	-0.0111757	0.0175047
0.0234	-0.026784	-0.0108661	0.0189422
0.0236	-0.0266169	-0.0115053	0.0175228
0.0238	-0.0265551	-0.0108711	0.0183963
0.024	-0.0268025	-0.0105016	0.0181597
0.0242	-0.0265365	-0.0113555	0.0171043
0.0244	-0.0264376	-0.0106514	0.0177958
0.0246	-0.0264932	-0.0105615	0.0185964
0.0248	-0.0268211	-0.0100771	0.016886
0.025	-0.0267407	-0.0103118	0.0180141
0.0252	-0.0267963	-0.0103118	0.0173955
0.0254	-0.0264437	-0.0107862	0.0173045
0.0256	-0.0268149	-0.0106963	0.0177776
0.0258	-0.0267654	-0.00995226	0.0175592
0.026	-0.0268087	-0.0107363	0.0173045
0.0262	-0.0268582	-0.010147	0.0170862
0.0264	-0.0266912	-0.0100971	0.0176684
0.0266	-0.0265303	-0.010966	0.0166858
0.0268	-0.0268334	-0.010137	0.0184327
0.027	-0.02692	-0.0106114	0.0175047
0.0272	-0.0266788	-0.010906	0.0166676
0.0274	-0.0263633	-0.0108611	0.0182871
0.0276	-0.0267901	-0.0113654	0.0176138
0.0278	-0.026518	-0.0108211	0.0175774
0.028	-0.0269386	-0.0105765	0.0183963
0.0282	-0.0267468	-0.0111208	0.0175047
0.0284	-0.0265118	-0.0107113	0.0182143
0.0286	-0.0268273	-0.0110159	0.01856
0.0288	-0.0267963	-0.0111308	0.0181415
0.029	-0.0265674	-0.0110658	0.0172317
0.0292	-0.0266293	-0.01169	0.017541
0.0294	-0.0266479	-0.0113605	0.0183781
0.0296	-0.0261777	-0.0114603	0.0175956
0.0298	-0.0264994	-0.0112806	0.0179414
0.03	-0.0262272	-0.0111308	0.0186328
0.0302	-0.0259922	-0.0113405	0.0170316
0.0304	-0.0264809	-0.0122493	0.0172863
0.0306	-0.0265303	-0.0115053	0.0166312
0.0308	-0.0264809	-0.0114104	0.0175592
0.031	-0.0265551	-0.0112107	0.0180869
0.0312	-0.0261468	-0.0107313	0.0173409
0.0314	-0.026419	-0.0111258	0.0191605
0.0316	-0.0262396	-0.0112356	0.01856
0.0318	-0.0266726	-0.0111308	0.0179596
0.032	-0.0264994	-0.0111907	0.0187784
0.0322	-0.0263262	-0.0113804	0.0175592
0.0324	-0.026586	-0.0118548	0.0189239
0.0326	-0.0266726	-0.0118249	0.0182507
0.0328	-0.026586	-0.01171	0.0186874
0.033	-0.0260293	-0.0119247	0.01967
0.0332	-0.0264314	-0.0115752	0.0168132
0.0334	-0.0266169	-0.0108711	0.0171953
0.0336	-0.026654	-0.0108611	0.0180869
0.0338	-0.0268025	-0.0106214	0.0175774
0.034	-0.0266664	-0.0105365	0.0184145
0.0342	-0.0264128	-0.0113005	0.0176138
0.0344	-0.0268644	-0.0110858	0.0180323
0.0346	-0.0267778	-0.0116801	0.0184327
0.0348	-0.0266169	-0.0114304	0.0180869
0.035	-0.0269757	-0.0115402	0.0186146
0.0352	-0.0267778	-0.0114603	0.0181961
0.0354	-0.0269819	-0.0110858	0.0182689
0.0356	-0.0268334	-0.0113105	0.0191059
0.0358	-0.0268458	-0.0108511	0.0186146
0.036	-0.0272479	-0.0111757	0.0183235
0.0362	-0.0269819	-0.0113005	0.0172499
0.0364	-0.0266726	-0.0110908	0.0190331
0.0366	-0.0268087	-0.0115752	0.0178868
0.0368	-0.0267345	-0.01171	0.0179232
0.037	-0.0268458	-0.0115902	0.0184327
0.0372	-0.0268273	-0.0118498	0.0174683
0.0374	-0.0266169	-0.0114553	0.017723
0.0376	-0.0265241	-0.0113305	0.0190149
0.0378	-0.0268087	-0.0117	0.0182871
0.038	-0.0270128	-0.0115153	0.0180323
0.0382	-0.0266107	-0.0117799	0.0177776
0.0384	-0.0267407	-0.0115502	0.0180141
0.0386	-0.0266107	-0.0113754	0.0187238
0.0388	-0.026518	-0.0116401	0.0172863
0.039	-0.0268582	-0.0112656	0.0191787
0.0392	-0.0263015	-0.0115402	0.0176138
0.0394	-0.0267159	-0.0118348	0.0186692
0.0396	-0.0264561	-0.0113754	0.0180505
0.0398	-0.0265798	-0.0116551	0.0172499
0.04	-0.026685	-0.0111457	0.017723
0.0402	-0.0267716	-0.0113754	0.0182143
0.0404	-0.0263076	-0.0106663	0.0191969
0.0406	-0.0262025	-0.010946	0.0182689
0.0408	-0.0262582	-0.0105715	0.0181415
0.041	-0.0261468	-0.0116801	0.0186692
0.0412	-0.0261963	-0.0107612	0.0167222
0.0414	-0.0262458	-0.0107962	0.0183781
0.0416	-0.0262396	-0.0107912	0.0174319
0.0418	-0.026085	-0.0101021	0.0171589
0.042	-0.0260293	-0.0108112	0.0181051
0.0422	-0.0261406	-0.0113555	0.0177958
0.0424	-0.0261097	-0.0110958	0.0183963
0.0426	-0.0258375	-0.0114354	0.0166494
0.0428	-0.0261283	-0.0115752	0.0168678
0.043	-0.026487	-0.0106713	0.0172681
0.0432	-0.0261963	-0.0113505	0.0182325
0.0434	-0.0260417	-0.0114753	0.0185054
0.0436	-0.0261283	-0.0111757	0.0178868
0.0438	-0.0258313	-0.0112756	0.0167404
0.044	-0.0264376	-0.0110658	0.0180869
0.0442	-0.0261777	-0.0107712	0.0178322
0.0444	-0.025986	-0.0113754	0.0172499
0.0446	-0.0262582	-0.0119547	0.017541
0.0448	-0.0261654	-0.0110109	0.0184509
0.045	-0.0263633	-0.0118099	0.0171043
0.0452	-0.0261283	-0.0119697	0.017632
0.0454	-0.0263386	-0.0118598	0.0175228
0.0456	-0.0265489	-0.0112306	0.0165403
0.0458	-0.0266417	-0.0111757	0.018742
0.046	-0.0265613	-0.0110858	0.0171043
0.0462	-0.0266602	-0.0107013	0.0171043
0.0464	-0.0262582	-0.0105865	0.0180141
0.0466	-0.0265489	-0.0100272	0.0175774
0.0468	-0.0265489	-0.010137	0.0174319
0.047	-0.0268149	-0.00998222	0.0181779
0.0472	-0.0265365	-0.00995725	0.016795
0.0474	-0.0266788	-0.0102818	0.0183963
0.0476	-0.0265365	-0.010906	0.0183417
0.0478	-0.0264561	-0.0105515	0.0168496
0.048	-0.0267901	-0.0105265	0.0173409
0.0482	-0.0266231	-0.0102918	0.0180687
0.0484	-0.0267035	-0.00958273	0.0179414
0.0486	-0.0266726	-0.00928811	0.0173955
0.0488	-0.026085	-0.00928312	0.0188148
0.049	-0.0266169	-0.00939797	0.0169224
0.0492	-0.0263138	-0.00880872	0.0180505
0.0494	-0.0264809	-0.0084392	0.0177048
0.0496	-0.0261159	-0.00924317	0.0180505
0.0498	-0.0258994	-0.00965264	0.0171225
0.05	-0.0263448	-0.00863395	0.017541
0.0502	-0.0259551	-0.00973754	0.0177776
0.0504	-0.0262767	-0.00969259	0.0186146
0.0506	-0.02632	-0.0094529	0.0176684
0.0508	-0.0262272	-0.00954279	0.017996
0.051	-0.0259365	-0.00955777	0.0175956
0.0512	-0.0263695	-0.00943792	0.0186874
0.0514	-0.0265241	-0.00996724	0.0181233
0.0516	-0.0261035	-0.0108811	0.0178868
0.0518	-0.0260973	-0.0105665	0.0187602
0.052	-0.0261468	-0.0110708	0.0182143
0.0522	-0.0262458	-0.0109909	0.0185054
0.0524	-0.0264623	-0.0116301	0.0178868
0.0526	-0.026153	-0.0114453	0.017814
0.0528	-0.0262705	-0.0113505	0.0199247
0.053	-0.0256025	-0.0114254	0.0188512
0.0532	-0.0259613	-0.0113904	0.0186328
0.0534	-0.0261716	-0.011695	0.0171407
0.0536	-0.0258685	-0.0110858	0.0180687
0.0538	-0.0258375	-0.0110009	0.0189604
0.054	-0.0258375	-0.0107912	0.0178322
0.0542	-0.0259118	-0.0107812	0.018651
0.0544	-0.0256643	-0.0110009	0.0176684
0.0546	-0.0259736	-0.0114553	0.0174683
0.0548	-0.0258932	-0.0108811	0.0181779
0.055	-0.0259489	-0.0106564	0.017723
0.0552	-0.0258685	-0.0107762	0.0180141
0.0554	-0.0257571	-0.0108211	0.0180505
0.0556	-0.0254602	-0.0106164	0.0178868
0.0558	-0.0258252	-0.00987736	0.017723
0.056	-0.0254726	-0.0102419	0.0179414
0.0562	-0.0254045	-0.00986238	0.0172681
0.0564	-0.0254911	-0.00999221	0.0177776
0.0566	-0.0251942	-0.00902844	0.0190149
0.0568	-0.0255468	-0.00947787	0.0175228
0.057	-0.0255654	-0.00980745	0.0195972
0.0572	-0.0253241	-0.0103468	0.0183781
0.0574	-0.0252313	-0.0102519	0.0167768
0.0576	-0.0254293	-0.00999221	0.0178504
0.0578	-0.0253798	-0.0100871	0.018833
0.058	-0.0254169	-0.010926	0.0179414
0.0582	-0.025652	-0.0107413	0.0188512
0.0584	-0.0254788	-0.0103068	0.0184691
0.0586	-0.0255283	-0.0102769	0.0183781
0.0588	-0.0255654	-0.0105565	0.0172681
0.059	-0.0254231	-0.0113904	0.0183781
0.0592	-0.0257633	-0.0112806	0.0181779
0.0594	-0.0257324	-0.0113804	0.0176866
0.0596	-0.0255159	-0.0122144	0.0188148
0.0598	-0.025621	-0.0122893	0.0175774
0.06	-0.0256087	-0.012509	0.0179414
0.0602	-0.0256829	-0.0120246	0.017814
0.0604	-0.0254911	-0.0115253	0.0184509
0.0606	-0.0253489	-0.011725	0.0184691
0.0608	-0.0252066	-0.0124641	0.0179414
0.061	-0.0256953	-0.0118648	0.017723
0.0612	-0.0251509	-0.0116501	0.017996
0.0614	-0.0253798	-0.011705	0.0186874
0.0616	-0.0251942	-0.0122144	0.0173955
0.0618	-0.0250087	-0.0119547	0.0172499
0.062	-0.0256582	-0.0127087	0.0183053
0.0622	-0.0253922	-0.0118348	0.0178686
0.0624	-0.0253241	-0.0111607	0.0175047
0.0626	-0.0251509	-0.0115103	0.0172863
0.0628	-0.0253551	-0.0113105	0.0170316
0.063	-0.0257076	-0.0112156	0.0171589
0.0632	-0.0253798	-0.0111957	0.0185782
0.0634	-0.0253798	-0.0107512	0.0179414
0.0636	-0.0253118	-0.0108711	0.0179414
0.0638	-0.0254355	-0.0112606	0.0183235
0.064	-0.025553	-0.0108311	0.0177958
0.0642	-0.0254231	-0.0105315	0.0179232
0.0644	-0.0256458	-0.0108661	0.0174137
0.0646	-0.025485	-0.0106114	0.0177776
0.0648	-0.0256582	-0.00992729	0.0180869
0.065	-0.0256891	-0.0107313	0.0174683
0.0652	-0.0256829	-0.0106963	0.0171589
0.0654	-0.0262149	-0.0105515	0.0188148
0.0656	-0.0259365	-0.0108861	0.0177594
0.0658	-0.0262087	-0.0116651	0.0177958
0.066	-0.0261159	-0.0113355	0.0183963
0.0662	-0.0258994	-0.0115003	0.017541
0.0664	-0.0264809	-0.0108162	0.0177776
0.0666	-0.0262643	-0.0110059	0.0178322
0.0668	-0.0265984	-0.0116301	0.0169588
0.067	-0.0265118	-0.0112007	0.0175592
0.0672	-0.0267778	-0.010896	0.0180323
0.0674	-0.0263633	-0.0116601	0.0172681
0.0676	-0.0268211	-0.0109909	0.0173955
0.0678	-0.026784	-0.0110708	0.0177958
0.068	-0.0267097	-0.0112406	0.0181233
0.0682	-0.0267778	-0.0114254	0.0170679
0.0684	-0.026685	-0.0120146	0.0181961
0.0686	-0.0268767	-0.0109809	0.0177958
0.0688	-0.0268211	-0.0104666	0.0184691
0.069	-0.0270685	-0.0107263	0.0179596
0.0692	-0.0267221	-0.0107562	0.0168132
0.0694	-0.0268087	-0.0103018	0.0177594
0.0696	-0.026753	-0.0105265	0.0183781
0.0698	-0.0264747	-0.00950284	0.0178322
0.07	-0.026487	-0.010157	0.0169406
0.0702	-0.0265365	-0.0100721	0.0181233
0.0704	-0.0267345	-0.00989733	0.0171225
0.0706	-0.0268396	-0.010127	0.0187056
0.0708	-0.0268025	-0.00966763	0.0179778
0.071	-0.0267778	-0.00946788	0.0183963
0.0712	-0.0272046	-0.00999221	0.0184691
0.0714	-0.0268087	-0.00995725	0.0185964
0.0716	-0.0268149	-0.0103567	0.0177776
0.0718	-0.0270252	-0.0105565	0.0185236
0.072	-0.026654	-0.010172	0.0184873
0.0722	-0.0269633	-0.0096876	0.0177958
0.0724	-0.0268334	-0.0098424	0.01856
0.0726	-0.0271118	-0.0100621	0.0181415
0.0728	-0.0269077	-0.0104067	0.0191787
0.073	-0.0264252	-0.0103268	0.0182325
0.0732	-0.0267283	-0.0105565	0.017541
0.0734	-0.0269077	-0.0104916	0.0172317
0.0736	-0.0267035	-0.0108661	0.0178686
0.0738	-0.0268458	-0.0112856	0.018651
0.074	-0.026784	-0.0113904	0.018833
0.0742	-0.0266912	-0.0119947	0.0175774
0.0744	-0.0266912	-0.0121145	0.0180141
0.0746	-0.0267468	-0.0118149	0.0186692
0.0748	-0.0266046	-0.0115902	0.0190877
0.075	-0.0265736	-0.0115852	0.0178686
0.0752	-0.0269262	-0.0112256	0.0188876
0.0754	-0.0263262	-0.0105365	0.0180323
0.0756	-0.0267654	-0.0108261	0.0186692
0.0758	-0.026518	-0.0110858	0.0189422
0.076	-0.0265241	-0.0104117	0.0185418
0.0762	-0.0268273	-0.0111357	0.0189239
0.0764	-0.0266417	-0.010911	0.0180687
0.0766	-0.026654	-0.0112706	0.0184509
0.0768	-0.0268953	-0.0108062	0.0185054
0.077	-0.0266107	-0.0110109	0.0183417
0.0772	-0.0266726	-0.0107363	0.0183053
0.0774	-0.0266046	-0.0102868	0.0176684
0.0776	-0.0268705	-0.00946788	0.0181233
0.0778	-0.026654	-0.0104217	0.0183781
0.078	-0.0265674	-0.0101121	0.0179414
0.0782	-0.026518	-0.0102369	0.0183963
0.0784	-0.026419	-0.0106813	0.0178868
0.0786	-0.0262458	-0.010946	0.0188512
0.0788	-0.0266664	-0.0110359	0.0171225
0.079	-0.0262458	-0.0107013	0.0183417
0.0792	-0.0263138	-0.0104616	0.0182871
0.0794	-0.0265303	-0.0106114	0.017814
0.0796	-0.0260107	-0.0107013	0.0173227
0.0798	-0.0264499	-0.00998222	0.0190695
0.08	-0.0265551	-0.0108211	0.0177776
0.0802	-0.0262705	-0.0104416	0.0181051
0.0804	-0.026153	-0.00977748	0.0191787
0.0806	-0.0257633	-0.010182	0.0180505
0.0808	-0.025986	-0.0105765	0.0175228
0.081	-0.0258994	-0.0101969	0.0186328
0.0812	-0.0259303	-0.0109011	0.0171771
0.0814	-0.0258066	-0.0107762	0.0180869
0.0816	-0.0259613	-0.0106613	0.0183235
0.0818	-0.0256396	-0.0109759	0.0179414
0.082	-0.0258375	-0.0108661	0.0185236
0.0822	-0.0259674	-0.0106264	0.0187238
0.0824	-0.02572	-0.0113455	0.0177958
0.0826	-0.0256087	-0.0106913	0.0173591
0.0828	-0.0258499	-0.0111208	0.0171043
0.083	-0.0259736	-0.0106963	0.0165039
0.0832	-0.0258808	-0.0106114	0.0188512
0.0834	-0.0258746	-0.0108661	0.0193243
0.0836	-0.025652	-0.0103967	0.0178504
0.0838	-0.02572	-0.0108162	0.0175047
0.084	-0.0257015	-0.0113405	0.0181961
0.0842	-0.0254664	-0.010916	0.0170134
0.0844	-0.025621	-0.0106713	0.0177412
0.0846	-0.0256272	-0.0113854	0.0180141
0.0848	-0.0258313	-0.0112656	0.0179596
0.085	-0.0257633	-0.0116301	0.0180687
0.0852	-0.0255963	-0.0118598	0.0175047
0.0854	-0.0258313	-0.0120995	0.0179414
0.0856	-0.025788	-0.0118898	0.0178868
0.0858	-0.0260355	-0.0121894	0.0174683
0.086	-0.0257757	-0.0118049	0.0162673
0.0862	-0.0258499	-0.0113205	0.0177776
0.0864	-0.0260169	-0.0119197	0.0172681
0.0866	-0.0259365	-0.0116601	0.0172681
0.0868	-0.0257819	-0.0111308	0.0176866
0.087	-0.0258499	-0.0114603	0.017632
0.0872	-0.026054	-0.0112256	0.0176502
0.0874	-0.0258561	-0.0122194	0.0184327
0.0876	-0.0259551	-0.0115752	0.0182325
0.0878	-0.0259798	-0.0112156	0.0182143
0.088	-0.0257633	-0.0107912	0.0180505
0.0882	-0.0262643	-0.010941	0.0171953
0.0884	-0.0258932	-0.0105715	0.0184145
0.0886	-0.0263633	-0.0111457	0.0182325
0.0888	-0.0260602	-0.0102719	0.0181051
0.089	-0.0262458	-0.0092931	0.0180505
0.0892	-0.0260726	-0.00975751	0.0186146
0.0894	-0.0264747	-0.010142	0.0181597
0.0896	-0.0260046	-0.00971756	0.0176866
0.0898	-0.0262582	-0.0095278	0.0185418
0.09	-0.0264437	-0.00896353	0.0177412
0.0902	-0.0262272	-0.00901346	0.0179778
0.0904	-0.0266602	-0.0105715	0.0179232
0.0906	-0.0266974	-0.00996724	0.0177958
0.0908	-0.0266788	-0.0098424	0.0192151
0.091	-0.0266479	-0.00936801	0.0188148
0.0912	-0.0268953	-0.00979746	0.0183053
0.0914	-0.0268644	-0.00928811	0.0193607
0.0916	-0.0267221	-0.00996225	0.0181415
0.0918	-0.0270499	-0.00963766	0.0180141
0.092	-0.0269262	-0.010142	0.0191059
0.0922	-0.0264623	-0.0102019	0.0179596
0.0924	-0.02692	-0.00962768	0.01856
0.0926	-0.0269633	-0.00973754	0.0183417
0.0928	-0.0270376	-0.0101919	0.0191423
0.093	-0.0262829	-0.00996225	0.0191787
0.0932	-0.0266788	-0.010182	0.0181233
0.0934	-0.026685	-0.0105615	0.0174137
0.0936	-0.026654	-0.0102968	0.0173409
0.0938	-0.026753	-0.010946	0.0193789
0.094	-0.0265613	-0.0108511	0.0170862
0.0942	-0.0266417	-0.0113255	0.0190513
0.0944	-0.0264809	-0.0115552	0.0184145
0.0946	-0.0268582	-0.0118748	0.0179414
0.0948	-0.0265613	-0.011715	0.0192697
0.095	-0.0268396	-0.0121544	0.0179596
0.0952	-0.0264809	-0.0123891	0.0186146
0.0954	-0.0263448	-0.0112057	0.0189785
0.0956	-0.0262953	-0.0117949	0.0184691
0.0958	-0.0264376	-0.0112905	0.0187602
0.096	-0.026351	-0.0111258	0.0182871
0.0962	-0.0262149	-0.0111557	0.0182143
0.0964	-0.0259674	-0.0112306	0.0175592
0.0966	-0.0262025	-0.0113605	0.0189785
0.0968	-0.0260293	-0.0119197	0.0186146
0.097	-0.0260355	-0.0112756	0.0189604
0.0972	-0.0258808	-0.0114104	0.01856
0.0974	-0.0262149	-0.0108411	0.0177412
0.0976	-0.0260169	-0.0115952	0.0187602
0.0978	-0.0260726	-0.0110559	0.0188694
0.098	-0.0262705	-0.0104416	0.0174683
0.0982	-0.0260788	-0.0106364	0.0192333
0.0984	-0.0260664	-0.0106963	0.0177412
0.0986	-0.0263571	-0.0108711	0.0186874
0.0988	-0.0262643	-0.0114304	0.0185054
0.099	-0.0261839	-0.0113954	0.0186328
0.0992	-0.0265922	-0.0111707	0.0182325
0.0994	-0.0261283	-0.0118099	0.0174137
0.0996	-0.0267345	-0.0111957	0.0186146
0.0998	-0.0268458	-0.0108811	0.0176502
0.1	-0.0228746	-0.0137574	0.0183963
0.1002	-0.0036248	-0.00857403	0.020689
0.1004	-0.0135095	-0.0146363	0.0117547
0.1006	-0.0260973	-0.0149409	0.0101898
0.1008	-0.0330748	-0.0139122	0.00988049
0.101	-0.0358892	-0.013288	0.0102808
0.1012	-0.0374171	-0.0124241	0.0117365
0.1014	-0.0374295	-0.0118548	0.0116637
0.1016	-0.0376707	-0.0123342	0.0127555
0.1018	-0.0375965	-0.0122693	0.0128465
0.102	-0.0373181	-0.0115352	0.0134833
0.1022	-0.0367614	-0.0115302	0.0132104
0.1024	-0.0364583	-0.0116251	0.0137381
0.1026	-0.0359635	-0.0102469	0.0139928
0.1028	-0.0354068	-0.0103767	0.0142112
0.103	-0.0357655	-0.00942294	0.012901
0.1032	-0.0350851	-0.00865892	0.0152665
0.1034	-0.0344727	-0.0102069	0.0160672
0.1036	-0.0345903	-0.009373	0.015121
0.1038	-0.033749	-0.00920322	0.0154485
0.104	-0.0338542	-0.00932307	0.0162309
0.1042	-0.0335449	-0.00870386	0.0164857
0.1044	-0.0334212	-0.00825443	0.0169042
0.1046	-0.0331861	-0.00811961	0.0159944
0.1048	-0.03305	-0.00814957	0.0166312
0.105	-0.0325057	-0.0084342	0.0165221
0.1052	-0.0323139	-0.00790988	0.0173045
0.1054	-0.0320727	-0.00815956	0.0161763
0.1056	-0.0318253	-0.0082794	0.016886
0.1058	-0.0317016	-0.00865392	0.0165403
0.106	-0.0315593	-0.00768017	0.016704
0.1062	-0.0312314	-0.00792486	0.0179232
0.1064	-0.0308603	-0.00832934	0.0177958
0.1066	-0.0305201	-0.00767018	0.0164857
0.1068	-0.0305387	-0.00841423	0.0177594
0.107	-0.0306747	-0.00784995	0.0179778
0.1072	-0.0305263	-0.00854906	0.017632
0.1074	-0.0301242	-0.00869387	0.0183963
0.1076	-0.0301242	-0.00803971	0.0190513
0.1078	-0.0298273	-0.00706096	0.0181233
0.108	-0.0292087	-0.00813958	0.0181779
0.1082	-0.0298149	-0.00844419	0.0191605
0.1084	-0.0292891	-0.00862895	0.0183417
0.1086	-0.029252	-0.00920322	0.0189785
0.1088	-0.029017	-0.0078899	0.0199793
0.109	-0.0288933	-0.00803971	0.0186692
0.1092	-0.0290726	-0.00651167	0.0191605
0.1094	-0.028751	-0.00584252	0.0210711
0.1096	-0.0286211	-0.00668644	0.0187602
0.1098	-0.0286953	-0.00613215	0.0197428
0.11	-0.0281943	-0.00563778	0.0192879
0.1102	-0.0279654	-0.00592741	0.0193061
0.1104	-0.0282376	-0.00611218	0.0193061
0.1106	-0.0281324	-0.00597735	0.019852
0.1108	-0.0279345	-0.00564777	0.0197246
0.111	-0.0281324	-0.00555789	0.0211985
0.1112	-0.0279407	-0.00556787	0.020507
0.1114	-0.0274767	-0.00518836	0.0201067
0.1116	-0.0275324	-0.00467901	0.0209801
0.1118	-0.0276809	-0.00481883	0.02078
0.112	-0.0273407	-0.00449924	0.0211075
0.1122	-0.0275757	-0.0044543	0.0212712
0.1124	-0.0272541	-0.00418464	0.0209255
0.1126	-0.0273654	-0.0049986	0.0218535
0.1128	-0.0272726	-0.0057027	0.0219991
0.113	-0.0266479	-0.00595238	0.0220355
0.1132	-0.0267345	-0.00585251	0.0210347
0.1134	-0.0268273	-0.00496864	0.0204524
0.1136	-0.0268953	-0.00498861	0.0212531
0.1138	-0.026252	-0.0051534	0.0216352
0.114	-0.0267035	-0.00545801	0.021526
0.1142	-0.0267221	-0.00557287	0.022272
0.1144	-0.0264004	-0.00555789	0.0212895
0.1146	-0.0264376	-0.00532818	0.0213986
0.1148	-0.0261097	-0.00538311	0.0222538
0.115	-0.0259489	-0.00543305	0.0214168
0.1152	-0.0260107	-0.0055479	0.0205798
0.1154	-0.0260046	-0.00520334	0.022363
0.1156	-0.0258252	-0.00517837	0.0209619
0.1158	-0.0258623	-0.00531819	0.0209619
0.116	-0.0254231	-0.00561282	0.0218353
0.1162	-0.0257942	-0.00582754	0.021344
0.1164	-0.025621	-0.00555289	0.0223812
0.1166	-0.0253303	-0.00548798	0.0212531
0.1168	-0.0255716	-0.0050785	0.0223084
0.117	-0.0253489	-0.00610718	0.0225086
0.1172	-0.0254045	-0.00549297	0.0214714
0.1174	-0.0256829	-0.00550795	0.0216716
0.1176	-0.0255839	-0.00595238	0.0223266
0.1178	-0.0253365	-0.00641179	0.0211075
0.118	-0.0255716	-0.00674137	0.0216898
0.1182	-0.025553	-0.0071858	0.0218717
0.1184	-0.0255097	-0.00710091	0.0220173
0.1186	-0.0255963	-0.00723574	0.0211985
0.1188	-0.0257138	-0.00579758	0.0214168
0.119	-0.0255901	-0.00569771	0.0223084
0.1192	-0.0255839	-0.00531819	0.0220901
0.1194	-0.0255839	-0.00544803	0.0212531
0.1196	-0.0256643	-0.00556787	0.0217262
0.1198	-0.0257324	-0.00557786	0.0213622
0.12	-0.0255654	-0.00644175	0.0225632
0.1202	-0.0258746	-0.00636685	0.0219445
0.1204	-0.0257448	-0.00510846	0.0229089
0.1206	-0.025485	-0.00595737	0.0220719
0.1208	-0.0256396	-0.00545801	0.0218353
0.121	-0.0255035	-0.00526826	0.021708
0.1212	-0.0252994	-0.00535315	0.0219263
0.1214	-0.0253674	-0.00542805	0.0211985
0.1216	-0.0252499	-0.00441934	0.0221993
0.1218	-0.0251757	-0.00453919	0.0210347
0.122	-0.02512	-0.00503356	0.0216716
0.1222	-0.0248416	-0.00451922	0.0221447
0.1224	-0.0249654	-0.00464406	0.0214714
0.1226	-0.0248169	-0.00525827	0.022272
0.1228	-0.024421	-0.00560283	0.0206708
0.123	-0.025287	-0.00547799	0.02078
0.1232	-0.0250334	-0.00606224	0.0219991
0.1234	-0.0247365	-0.00555289	0.0224722
0.1236	-0.0247241	-0.0059374	0.0214714
0.1238	-0.0244334	-0.0060173	0.0211621
0.124	-0.0247241	-0.00532818	0.022272
0.1242	-0.0248788	-0.0058575	0.0212712
0.1244	-0.0246004	-0.0063269	0.0227451
0.1246	-0.0247241	-0.00584752	0.0208527
0.1248	-0.0247179	-0.00610219	0.0222902
0.125	-0.025021	-0.00590244	0.022636
0.1252	-0.0250767	-0.00580757	0.0212167
0.1254	-0.0248355	-0.005468	0.0222902
0.1256	-0.0250149	-0.00630693	0.0219809
0.1258	-0.0247798	-0.00634688	0.021435
0.126	-0.0245757	-0.00576762	0.0218717
0.1262	-0.0246499	-0.00490872	0.0218535
0.1264	-0.0243282	-0.00529322	0.0213804
0.1266	-0.0242849	-0.0055479	0.0220901
0.1268	-0.024588	-0.00464905	0.0227269
0.127	-0.0243654	-0.00475391	0.0213258
0.1272	-0.0245324	-0.00541307	0.0229453
0.1274	-0.0243963	-0.00540808	0.0228725
0.1276	-0.0244643	-0.006252	0.0221811
0.1278	-0.0242478	-0.00655661	0.0222356
0.128	-0.024087	-0.00620705	0.0229999
0.1282	-0.0243592	-0.00675635	0.0217625
0.1284	-0.0241055	-0.0060173	0.0220901
0.1286	-0.0243097	-0.00496365	0.0229817
0.1288	-0.0239757	-0.00508849	0.0219263
0.129	-0.024186	-0.00470897	0.0231455
0.1292	-0.0238024	-0.00481883	0.0225086
0.1294	-0.0239324	-0.00557786	0.0219991
0.1296	-0.0239014	-0.0060922	0.0227815
0.1298	-0.0242416	-0.00548298	0.0230181
0.13	-0.0238086	-0.0064068	0.0226542
0.1302	-0.0237282	-0.00635187	0.0235276
0.1304	-0.0240994	-0.00715584	0.0221811
0.1306	-0.0238705	-0.00766519	0.0230727
0.1308	-0.0240066	-0.00634688	0.0229999
0.131	-0.0240932	-0.00666147	0.0229089
0.1312	-0.0240004	-0.00671141	0.0230363
0.1314	-0.0241612	-0.00535814	0.0239279
0.1316	-0.0239942	-0.00630693	0.022363
0.1318	-0.0242293	-0.00594739	0.0229817
0.132	-0.0242973	-0.0058625	0.0240371
0.1322	-0.0240932	-0.00674636	0.0221993
0.1324	-0.0243282	-0.00650667	0.0231273
0.1326	-0.0245571	-0.00717082	0.0234548
0.1328	-0.0243344	-0.00727569	0.0234548
0.133	-0.0240808	-0.00678631	0.0245466
0.1332	-0.0245447	-0.00697607	0.0221811
0.1334	-0.0242169	-0.0069511	0.0221811
0.1336	-0.0244952	-0.00617709	0.0227633
0.1338	-0.0246004	-0.00710091	0.022363
0.134	-0.0245633	-0.00693612	0.0227815
0.1342	-0.0248355	-0.00628196	0.0240189
0.1344	-0.0245014	-0.00564777	0.0224176
0.1346	-0.0245757	-0.00551294	0.0227633
0.1348	-0.0248169	-0.00497863	0.022636
0.135	-0.0247922	-0.00535814	0.0225632
0.1352	-0.0246375	-0.00504854	0.0231818
0.1354	-0.0248602	-0.00475391	0.0227815
0.1356	-0.0245138	-0.00504854	0.0230727
0.1358	-0.0243406	-0.00463906	0.0225632
0.136	-0.0245757	-0.00423458	0.0228361
0.1362	-0.0247551	-0.00440936	0.0223448
0.1364	-0.0242231	-0.0040648	0.0234548
0.1366	-0.0242045	-0.00427453	0.0231455
0.1368	-0.0242849	-0.00431947	0.0230909
0.137	-0.0240313	-0.00449425	0.023291
0.1372	-0.0244025	-0.00465404	0.0234548
0.1374	-0.0240623	-0.00543804	0.0226542
0.1376	-0.0238767	-0.00421461	0.0229635
0.1378	-0.0240623	-0.00508849	0.0230181
0.138	-0.0237653	-0.00536813	0.0227633
0.1382	-0.0235674	-0.00543804	0.0235276
0.1384	-0.0238086	-0.00607223	0.0236004
0.1386	-0.0237653	-0.00629694	0.0229089
0.1388	-0.0233942	-0.00622703	0.023382
0.139	-0.0237591	-0.00597735	0.022636
0.1392	-0.0235736	-0.00642178	0.0237459
0.1394	-0.0235798	-0.00724573	0.0230363
0.1396	-0.0235736	-0.00720578	0.0220537
0.1398	-0.0231591	-0.00758529	0.0227997
0.14	-0.0237591	-0.0071059	0.0236185
0.1402	-0.0234313	-0.00756532	0.0227997
0.1404	-0.0233262	-0.00665648	0.0234548
0.1406	-0.0233138	-0.00587748	0.0233274
0.1408	-0.0230107	-0.00615213	0.0219263
0.141	-0.0234251	-0.00678631	0.022636
0.1412	-0.0230231	-0.00556787	0.0234548
0.1414	-0.022986	-0.00616711	0.0226906
0.1416	-0.0230911	-0.00575763	0.0230363
0.1418	-0.022986	-0.00509348	0.0221447
0.142	-0.022788	-0.00530321	0.0220537
0.1422	-0.022955	-0.00555289	0.0225814
0.1424	-0.0229921	-0.00624201	0.0229999
0.1426	-0.0231282	-0.00564278	0.0227815
0.1428	-0.0230107	-0.00594739	0.0230363
0.143	-0.0235117	-0.00602729	0.0214532
0.1432	-0.0235117	-0.00574265	0.0229453
0.1434	-0.0232519	-0.00552792	0.0236731
0.1436	-0.0230973	-0.00569271	0.022454
0.1438	-0.0234499	-0.00482882	0.0228179
0.144	-0.0232086	-0.00504854	0.0228361
0.1442	-0.0234808	-0.00529822	0.0230545
0.1444	-0.0233138	-0.00469899	0.0227451
0.1446	-0.0234746	-0.00523829	0.0232
0.1448	-0.023388	-0.00598734	0.022363
0.145	-0.0233014	-0.00596736	0.0236549
0.1452	-0.0232767	-0.00541806	0.0230909
0.1454	-0.0233571	-0.00662152	0.0221811
0.1456	-0.023487	-0.00650667	0.0225632
0.1458	-0.0231901	-0.0063319	0.0236004
0.146	-0.0236664	-0.00678631	0.0226724
0.1462	-0.0235179	-0.00622204	0.0233274
0.1464	-0.0234189	-0.00571768	0.0227997
0.1466	-0.023753	-0.00586749	0.0224722
0.1468	-0.023555	-0.00576262	0.0236004
0.147	-0.023388	-0.00483381	0.0229453
0.1472	-0.023753	-0.00461409	0.0240189
0.1474	-0.0232705	-0.00470398	0.0232546
0.1476	-0.0234437	-0.00498362	0.0230909
0.1478	-0.0233385	-0.0047639	0.023564
0.148	-0.0234066	-0.00449924	0.0246375
0.1482	-0.0237282	-0.0049187	0.0226542
0.1484	-0.02332	-0.00463906	0.0229817
0.1486	-0.0235365	-0.0047689	0.0240007
0.1488	-0.0230787	-0.00445929	0.0236731
0.149	-0.0232829	-0.00558285	0.0231818
0.1492	-0.022955	-0.0050785	0.0238005
0.1494	-0.0231097	-0.00498861	0.0232182
0.1496	-0.0231406	-0.00469399	0.0240553
0.1498	-0.0226457	-0.00499361	0.0237277
0.15	-0.0227942	-0.00573766	0.0232364
0.1502	-0.0230973	-0.00507351	0.0227269
0.1504	-0.0227942	-0.00541806	0.022272
0.1506	-0.0228437	-0.0049986	0.0238187
0.1508	-0.02272	-0.00382011	0.0240007
0.151	-0.0224973	-0.00378516	0.0237823
0.1512	-0.0225096	-0.00420961	0.0240189
0.1514	-0.022522	-0.00438938	0.0238551
0.1516	-0.0225591	-0.0047639	0.023564
0.1518	-0.0227695	-0.0045292	0.0239643
0.152	-0.022454	-0.00488874	0.0231637
0.1522	-0.0222499	-0.00500859	0.0238551
0.1524	-0.022423	-0.00588247	0.0245829
0.1526	-0.022256	-0.00555289	0.0238733
0.1528	-0.0221942	-0.00576262	0.0241098
0.153	-0.0216127	-0.0065616	0.0246921
0.1532	-0.021854	-0.00650667	0.0232364
0.1534	-0.0218973	-0.00717581	0.0240007
0.1536	-0.0218601	-0.00643676	0.0241462
0.1538	-0.0218416	-0.0058575	0.0236185
0.154	-0.0218354	-0.00553791	0.0236731
0.1542	-0.0218292	-0.00504854	0.0241644
0.1544	-0.0215447	-0.00555289	0.0243828
0.1546	-0.0216498	-0.00541806	0.0235458
0.1548	-0.0219839	-0.00577261	0.0242554
0.155	-0.0215014	-0.00689617	0.0238369
0.1552	-0.0219591	-0.00702601	0.024128
0.1554	-0.0213467	-0.0066415	0.0238187
0.1556	-0.0213777	-0.00690117	0.024219
0.1558	-0.0215323	-0.00674636	0.0249105
0.156	-0.0213715	-0.0059374	0.023564
0.1562	-0.0210808	-0.00608721	0.0231273
0.1564	-0.021322	-0.00631192	0.0247831
0.1566	-0.0213158	-0.00555289	0.0230545
0.1568	-0.0211179	-0.00553292	0.0238733
0.157	-0.0215323	-0.00487376	0.0242554
0.1572	-0.0212663	-0.00566775	0.023382
0.1574	-0.0210065	-0.00571269	0.0230545
0.1576	-0.0213344	-0.00574265	0.0241644
0.1578	-0.0214581	-0.0057027	0.0237823
0.158	-0.0215571	-0.00577261	0.0229453
0.1582	-0.0216004	-0.00541806	0.0244738
0.1584	-0.0217859	-0.00600731	0.023564
0.1586	-0.0213839	-0.00608721	0.0235094
0.1588	-0.0217364	-0.00577261	0.0226178
0.159	-0.0213529	-0.00681628	0.0235458
0.1592	-0.0212107	-0.00760027	0.0236004
0.1594	-0.0214024	-0.007815	0.0237095
0.1596	-0.0212107	-0.00887864	0.0230727
0.1598	-0.0212849	-0.00820949	0.0240916
0.16	-0.0215323	-0.0071858	0.0227815
0.1602	-0.0213406	-0.00692613	0.0227633
0.1604	-0.0216313	-0.00592242	0.0241098
0.1606	-0.0217364	-0.00563279	0.023473
0.1608	-0.0215014	-0.00569271	0.0236549
0.161	-0.0217859	-0.00607223	0.0235458
0.1612	-0.0213962	-0.00509847	0.0241098
0.1614	-0.0212849	-0.00533317	0.0237277
0.1616	-0.0216127	-0.00594239	0.0240007
0.1618	-0.0214272	-0.00538311	0.0227087
0.162	-0.0216498	-0.00602229	0.0234912
0.1622	-0.0214581	-0.00631192	0.0247103
0.1624	-0.0215694	-0.00555289	0.0236731
0.1626	-0.0212787	-0.00600232	0.0241098
0.1628	-0.0213715	-0.00596237	0.0228725
0.163	-0.0221138	-0.00496365	0.0220355
0.1632	-0.0221694	-0.0049237	0.0239097
0.1634	-0.0220766	-0.00455916	0.0247649
0.1636	-0.0219158	-0.00508349	0.0227997
0.1638	-0.0219962	-0.00595238	0.0236549
0.164	-0.0222251	-0.00611717	0.0241462
0.1642	-0.0221632	-0.00678132	0.0235094
0.1644	-0.0224292	-0.00671141	0.0235094
0.1646	-0.0219962	-0.00640181	0.0236913
0.1648	-0.0222808	-0.00717082	0.0233638
0.165	-0.0222127	-0.00723074	0.0230909
0.1652	-0.0220581	-0.0067164	0.0232546
0.1654	-0.0224725	-0.00704598	0.0231637
0.1656	-0.0222622	-0.007031	0.0236549
0.1658	-0.022256	-0.00694611	0.0227087
0.166	-0.0223798	-0.00681128	0.0228725
0.1662	-0.0223241	-0.00813958	0.0241098
0.1664	-0.0222065	-0.00760527	0.0234002
0.1666	-0.0221323	-0.00799976	0.0240371
0.1668	-0.0222684	-0.00754035	0.0230363
0.167	-0.0222375	-0.0073456	0.0236004
0.1672	-0.0220828	-0.00754035	0.0244738
0.1674	-0.0222499	-0.00715584	0.0240007
0.1676	-0.022188	-0.00643177	0.0231637
0.1678	-0.0222251	-0.00602229	0.0236549
0.168	-0.0218663	-0.00591743	0.023564
0.1682	-0.0219777	-0.00557287	0.0232546
0.1684	-0.0219468	-0.00590244	0.0234002
0.1686	-0.0219282	-0.00541806	0.0236185
0.1688	-0.022355	-0.00520334	0.023473
0.169	-0.0221756	-0.00617709	0.0240371
0.1692	-0.0217364	-0.00559783	0.0235276
0.1694	-0.0217674	-0.00590744	0.0234184
0.1696	-0.0216127	-0.0059374	0.0239643
0.1698	-0.0217921	-0.00611717	0.0245284
0.17	-0.021755	-0.0053132	0.0237459
0.1702	-0.0212973	-0.0053132	0.0246193
0.1704	-0.0215571	-0.00643676	0.0238187
0.1706	-0.0217859	-0.00665149	0.0230181
0.1708	-0.0217859	-0.00620705	0.0247649
0.171	-0.0217797	-0.00658657	0.0243282
0.1712	-0.0217983	-0.00644175	0.0238733
0.1714	-0.0219962	-0.00699605	0.024128
0.1716	-0.0217488	-0.00627697	0.0247467
0.1718	-0.0217797	-0.0067963	0.0240189
0.172	-0.0214643	-0.00603228	0.0252016
0.1722	-0.021322	-0.00669143	0.0243646
0.1724	-0.02139	-0.00594239	0.0247285
0.1726	-0.0214705	-0.00568772	0.0253654
0.1728	-0.0214766	-0.00677133	0.0252016
0.173	-0.0207405	-0.00681628	0.0254745
0.1732	-0.0205117	-0.00735059	0.0235094
0.1734	-0.0209323	-0.00772511	0.0237095
0.1736	-0.0207344	-0.00738555	0.0252198
0.1738	-0.020388	-0.00767518	0.0241462
0.174	-0.020555	-0.00784995	0.0244556
0.1742	-0.0200663	-0.00697108	0.0248377
0.1744	-0.0199983	-0.00660654	0.0238733
0.1746	-0.0203509	-0.00650667	0.024492
0.1748	-0.0200849	-0.00626198	0.0244192
0.175	-0.0198498	-0.00600232	0.0248195
0.1752	-0.0197261	-0.00529322	0.0244556
0.1754	-0.019689	-0.00551294	0.0246921
0.1756	-0.0196642	-0.00629694	0.0239461
0.1758	-0.0198993	-0.00549297	0.0239097
0.176	-0.0197694	-0.0057027	0.0257475
0.1762	-0.0198374	-0.00647172	0.0234912
0.1764	-0.0199426	-0.00654662	0.0245466
0.1766	-0.0197756	-0.0067164	0.0241462
0.1768	-0.0199612	-0.00708593	0.0246739
0.177	-0.020091	-0.0071109	0.02542
0.1772	-0.0203323	-0.00717581	0.0242372
0.1774	-0.020357	-0.00677633	0.0239825
0.1776	-0.0204807	-0.00616211	0.0252926
0.1778	-0.0200416	-0.00673638	0.0248195
0.178	-0.0204498	-0.00650667	0.0239279
0.1782	-0.0206973	-0.00565776	0.0251834
0.1784	-0.0201591	-0.006252	0.0239643
0.1786	-0.0205674	-0.00713087	0.0248559
0.1788	-0.0209323	-0.00718081	0.0247285
0.179	-0.0208086	-0.00769515	0.0245829
0.1792	-0.0208643	-0.00720078	0.024401
0.1794	-0.0211426	-0.00767518	0.0256019
0.1796	-0.0206911	-0.00867889	0.0246921
0.1798	-0.0210313	-0.00878875	0.0247649
0.18	-0.0211302	-0.00985239	0.0246921
0.1802	-0.0209632	-0.00938299	0.0247467
0.1804	-0.0212849	-0.00772012	0.0259841
0.1806	-0.0208086	-0.00802972	0.0247285
0.1808	-0.0209509	-0.00740053	0.0243464
0.181	-0.0208148	-0.00700104	0.0254382
0.1812	-0.0209694	-0.00632191	0.023564
0.1814	-0.020821	-0.00592741	0.0242918
0.1816	-0.0208581	-0.0067164	0.0242918
0.1818	-0.0208086	-0.00672639	0.0243646
0.182	-0.0207405	-0.00560283	0.0239097
0.1822	-0.0208519	-0.00547799	0.0240007
0.1824	-0.0205364	-0.00612716	0.0240734
0.1826	-0.020623	-0.00579758	0.0248923
0.1828	-0.0205674	-0.00575264	0.0247103
0.183	-0.0210437	-0.0056278	0.0229271
0.1832	-0.0207529	-0.00521832	0.024219
0.1834	-0.0208643	-0.00463407	0.0247649
0.1836	-0.020623	-0.00505853	0.0247103
0.1838	-0.0207282	-0.00534815	0.0236731
0.184	-0.02079	-0.00590244	0.0235094
0.1842	-0.0204003	-0.00613714	0.0250379
0.1844	-0.0207591	-0.0050785	0.023564
0.1846	-0.0205302	-0.00549796	0.0249469
0.1848	-0.0209323	-0.00586749	0.0241462
0.185	-0.0208333	-0.00593241	0.0242554
0.1852	-0.020654	-0.00692114	0.0247467
0.1854	-0.0207405	-0.00725571	0.0242918
0.1856	-0.0206045	-0.00694611	0.0240007
0.1858	-0.020988	-0.00750539	0.0247831
0.186	-0.020623	-0.00785495	0.0236549
0.1862	-0.020388	-0.00782998	0.0238005
0.1864	-0.0207777	-0.00854906	0.0248741
0.1866	-0.0205612	-0.00888363	0.0234366
0.1868	-0.0204374	-0.0095328	0.02431
0.187	-0.0205674	-0.00959272	0.0245284
0.1872	-0.0205983	-0.00871884	0.0237823
0.1874	-0.0204498	-0.00791487	0.0238915
0.1876	-0.0203261	-0.007031	0.0248195
0.1878	-0.0203941	-0.007031	0.0238005
0.188	-0.0200972	-0.00721077	0.0244738
0.1882	-0.0204869	-0.00620206	0.025147
0.1884	-0.020357	-0.00540808	0.0240553
0.1886	-0.0199612	-0.00548298	0.0247285
0.1888	-0.0204746	-0.00561282	0.0247831
0.189	-0.0199983	-0.00512844	0.0241644
0.1892	-0.0202766	-0.00547799	0.0237459
0.1894	-0.0205117	-0.00410974	0.0255837
0.1896	-0.0205612	-0.00457914	0.0240916
0.1898	-0.0203941	-0.00485878	0.0248923
0.19	-0.0206045	-0.00434444	0.0248195
0.1902	-0.0203694	-0.00475391	0.0236368
0.1904	-0.020289	-0.00532818	0.0241826
0.1906	-0.0204746	-0.0047689	0.0237823
0.1908	-0.0205674	-0.00506851	0.0240916
0.191	-0.0205983	-0.00338567	0.025056
0.1912	-0.020623	-0.00315596	0.0254018
0.1914	-0.0204684	-0.00346556	0.024492
0.1916	-0.0206107	-0.00420961	0.0250197
0.1918	-0.0204622	-0.00530821	0.0248741
0.192	-0.0202581	-0.0053881	0.0245829
0.1922	-0.0206168	-0.00557786	0.0251288
0.1924	-0.0203756	-0.00669143	0.0245829
0.1926	-0.0207282	-0.00679131	0.0257657
0.1928	-0.0209694	-0.00670142	0.026257
0.193	-0.0201282	-0.00737057	0.0265663
0.1932	-0.020289	-0.00783996	0.0248377
0.1934	-0.0206168	-0.00748043	0.0254745
0.1936	-0.0203632	-0.00749541	0.0247649
0.1938	-0.020122	-0.00651666	0.0243646
0.194	-0.0203509	-0.00644175	0.0252562
0.1942	-0.0199983	-0.00651167	0.024128
0.1944	-0.0201715	-0.00659656	0.025511
0.1946	-0.0202519	-0.00668644	0.0251652
0.1948	-0.020456	-0.00622703	0.0250015
0.195	-0.0201529	-0.00597735	0.0249651
0.1952	-0.0204993	-0.00555789	0.0251288
0.1954	-0.0201591	-0.00506352	0.0243464
0.1956	-0.0204498	-0.00674636	0.0253836
0.1958	-0.0204807	-0.00612216	0.0246739
0.196	-0.019955	-0.00646672	0.0252562
0.1962	-0.0201096	-0.00749541	0.0253108
0.1964	-0.0201776	-0.00682626	0.0258749
0.1966	-0.0200168	-0.0067963	0.024401
0.1968	-0.0201282	-0.0067214	0.0258567
0.197	-0.0204251	-0.00688619	0.0248559
0.1972	-0.020023	-0.00623202	0.0250379
0.1974	-0.0203014	-0.00587748	0.0243464
0.1976	-0.0203509	-0.00580757	0.0259658
0.1978	-0.02019	-0.00517837	0.0239643
0.198	-0.020357	-0.0055479	0.0246739
0.1982	-0.0204684	-0.00572267	0.0248559
0.1984	-0.0202581	-0.00544303	0.0254382
0.1986	-0.0203199	-0.00595737	0.0254382
0.1988	-0.0204746	-0.0056228	0.0242372
0.199	-0.020524	-0.00591243	0.0257111
0.1992	-0.0206725	-0.00646672	0.02542
0.1994	-0.0204374	-0.00740053	0.0249105
0.1996	-0.020524	-0.00694112	0.0257111
0.1998	-0.0207591	-0.00869887	0.0252926
0.2	-0.0203199	-0.00922819	0.024492
0.2002	-0.0204807	-0.00841922	0.0259476
0.2004	-0.020555	-0.0078899	0.02542
0.2006	-0.0207467	-0.00781999	0.0258931
0.2008	-0.0205117	-0.0080497	0.025329
0.201	-0.0208086	-0.00842422	0.0245284
0.2012	-0.0206787	-0.00754035	0.0247467
0.2014	-0.0204931	-0.00824445	0.0257657
0.2016	-0.0204993	-0.00727569	0.024401
0.2018	-0.0205921	-0.00649668	0.0247649
0.202	-0.0207529	-0.00774009	0.0247831
0.2022	-0.0206045	-0.00775507	0.025238
0.2024	-0.0203632	-0.00724573	0.024492
0.2026	-0.0203199	-0.00815956	0.0245647
0.2028	-0.0201653	-0.00770014	0.0238551
0.203	-0.0206601	-0.00723574	0.0235822
0.2032	-0.0206478	-0.00746045	0.0249651
0.2034	-0.0206045	-0.00775507	0.0250742
0.2036	-0.0201034	-0.00633689	0.0247649
0.2038	-0.020357	-0.00654662	0.0247467
0.204	-0.0200168	-0.00591743	0.0244374
0.2042	-0.020357	-0.00544803	0.02542
0.2044	-0.0201962	-0.00598234	0.0252198
0.2046	-0.0200477	-0.00542805	0.024492
0.2048	-0.0199426	-0.00593241	0.0251834
0.205	-0.0201158	-0.00678631	0.0250742
0.2052	-0.0199735	-0.00630193	0.0244374
0.2054	-0.020289	-0.00627197	0.025238
0.2056	-0.0201653	-0.00644175	0.0247649
0.2058	-0.020023	-0.00659156	0.0244738
0.206	-0.0201776	-0.00645674	0.0251834
0.2062	-0.0203756	-0.00594239	0.0250924
0.2064	-0.0202643	-0.00599233	0.0242918
0.2066	-0.0206849	-0.00637184	0.0257475
0.2068	-0.0200849	-0.00702101	0.0244192
0.207	-0.0204374	-0.00626698	0.0245829
0.2072	-0.0203632	-0.00597735	0.0249469
0.2074	-0.0204622	-0.00730066	0.025511
0.2076	-0.0202581	-0.00785994	0.0256201
0.2078	-0.0205983	-0.00905341	0.02542
0.208	-0.0203323	-0.00789489	0.0258385
0.2082	-0.0201343	-0.00725571	0.0244556
0.2084	-0.0202086	-0.00741051	0.026075
0.2086	-0.0200601	-0.00772511	0.0252744
0.2088	-0.0201034	-0.00730565	0.025056
0.209	-0.0200972	-0.0071908	0.0262388
0.2092	-0.0202395	-0.00661154	0.025147
0.2094	-0.0201653	-0.00682127	0.025147
0.2096	-0.0201034	-0.00655661	0.0248559
0.2098	-0.0200849	-0.00580257	0.0250924
0.21	-0.0202519	-0.00630693	0.0257839
0.2102	-0.0201591	-0.00693612	0.0259476
0.2104	-0.0199364	-0.00797979	0.0239279
0.2106	-0.0202704	-0.0074205	0.026348
0.2108	-0.0201776	-0.00708094	0.0251834
0.211	-0.020023	-0.00564278	0.0252562
0.2112	-0.0199364	-0.00568273	0.0249105
0.2114	-0.0200045	-0.00580257	0.025511
0.2116	-0.0198313	-0.00533817	0.0252198
0.2118	-0.020221	-0.00594239	0.0247831
0.212	-0.0201776	-0.00622703	0.0254564
0.2122	-0.019955	-0.00590244	0.0246921
0.2124	-0.0203447	-0.00606224	0.0257111
0.2126	-0.0202766	-0.00576262	0.0253472
0.2128	-0.0203632	-0.00665149	0.0259841
0.213	-0.019924	-0.00677133	0.0260204
0.2132	-0.020023	-0.00692613	0.025329
0.2134	-0.020357	-0.00800475	0.0239461
0.2136	-0.0201962	-0.00744048	0.0251652
0.2138	-0.0202704	-0.00678132	0.0244192
0.214	-0.0204251	-0.00626198	0.0248741
0.2142	-0.0207096	-0.00564278	0.0252016
0.2144	-0.0206911	-0.00598734	0.025511
0.2146	-0.0208333	-0.00602729	0.0248013
0.2148	-0.0207962	-0.00579758	0.025238
0.215	-0.0206292	-0.0071858	0.0258021
0.2152	-0.0207096	-0.007031	0.0258567
0.2154	-0.0207282	-0.00645174	0.0249651
0.2156	-0.0205612	-0.00768516	0.0255291
0.2158	-0.0209137	-0.00741051	0.0256929
0.216	-0.0206601	-0.00729566	0.0255837
0.2162	-0.0204313	-0.00750539	0.0258931
0.2164	-0.0205735	-0.0064817	0.024219
0.2166	-0.020524	-0.00607223	0.0258567
0.2168	-0.0204684	-0.00649668	0.0255837
0.217	-0.0203941	-0.00586749	0.0251834
0.2172	-0.0203694	-0.00521333	0.0248741
0.2174	-0.0201343	-0.00555789	0.0250197
0.2176	-0.0202024	-0.00522831	0.0251652
0.2178	-0.020091	-0.00591243	0.0252198
0.218	-0.0199612	-0.00675635	0.0245102
0.2182	-0.020456	-0.00716083	0.025511
0.2184	-0.0199302	-0.00699105	0.0247285
0.2186	-0.0196828	-0.00709092	0.025238
0.2188	-0.0200972	-0.00663151	0.0250197
0.219	-0.0198313	-0.00606723	0.0253108
0.2192	-0.0198869	-0.00578759	0.0255655
0.2194	-0.0200045	-0.00512844	0.02542
0.2196	-0.0198993	-0.0053132	0.0250197
0.2198	-0.0196952	-0.00540308	0.0252198
0.22	-0.019757	-0.00587748	0.02431
0.2202	-0.0198622	-0.00662652	0.025329
0.2204	-0.0197199	-0.00610219	0.0250379
0.2206	-0.0197014	-0.00634688	0.0257111
0.2208	-0.0196024	-0.00666647	0.025329
0.221	-0.0198189	-0.00629195	0.0252016
0.2212	-0.0193735	-0.00569271	0.0248377
0.2214	-0.0194168	-0.00654163	0.0252198
0.2216	-0.019522	-0.00649169	0.0254564
0.2218	-0.0195653	-0.00598234	0.0249651
0.222	-0.0196395	-0.00635187	0.0259476
0.2222	-0.0193302	-0.00639681	0.0245829
0.2224	-0.019324	-0.00603228	0.0249833
0.2226	-0.0194106	-0.00676135	0.025056
0.2228	-0.0194168	-0.00682626	0.0239461
0.223	-0.0195838	-0.00698106	0.0246375
0.2232	-0.0199364	-0.00702601	0.0251834
0.2234	-0.0194168	-0.00730565	0.0258749
0.2236	-0.0195096	-0.00784496	0.0256019
0.2238	-0.0193178	-0.00836429	0.0249469
0.224	-0.019157	-0.00820949	0.0241826
0.2242	-0.0191879	-0.00778504	0.0255837
0.2244	-0.019256	-0.00788491	0.0243282
0.2246	-0.0188663	-0.00753036	0.0244738
0.2248	-0.0187921	-0.00813459	0.0257839
0.225	-0.0186622	-0.00898849	0.0238005
0.2252	-0.0185199	-0.00847415	0.0248013
0.2254	-0.0187982	-0.00849912	0.0252926
0.2256	-0.0184333	-0.00831436	0.0234912
0.2258	-0.0185199	-0.00717082	0.0250197
0.226	-0.0184518	-0.00706096	0.0245829
0.2262	-0.018322	-0.00760027	0.024401
0.2264	-0.0185199	-0.00686122	0.0258021
0.2266	-0.0182787	-0.00630693	0.025056
0.2268	-0.0184085	-0.0063269	0.0245466
0.227	-0.0185137	-0.00563279	0.0249651
0.2272	-0.0186312	-0.00529822	0.0248377
0.2274	-0.0183776	-0.00565776	0.0248741
0.2276	-0.0185818	-0.0061721	0.0247831
0.2278	-0.0187302	-0.00595238	0.0255655
0.228	-0.0185013	-0.0057027	0.025056
0.2282	-0.0186684	-0.00559284	0.02542
0.2284	-0.0186498	-0.00598234	0.0256383
0.2286	-0.0187549	-0.00664649	0.0247103
0.2288	-0.0187982	-0.00732562	0.0252926
0.229	-0.0189034	-0.00634188	0.025147
0.2292	-0.018891	-0.00623202	0.0250924
0.2294	-0.0190333	-0.00637184	0.0252016
0.2296	-0.0189653	-0.00732562	0.0249105
0.2298	-0.019089	-0.00597735	0.0247649
0.23	-0.018891	-0.00673138	0.0262388
0.2302	-0.0189405	-0.00620206	0.0250924
0.2304	-0.0190333	-0.00717581	0.0248923
0.2306	-0.0190704	-0.00724573	0.0261842
0.2308	-0.0189158	-0.00668145	0.0250015
0.231	-0.0189838	-0.00716083	0.0250379
0.2312	-0.0185323	-0.0068762	0.0255291
0.2314	-0.0189467	-0.00597236	0.0251288
0.2316	-0.0190395	-0.0068712	0.0249287
0.2318	-0.0190395	-0.00569271	0.0266027
0.232	-0.018891	-0.00580757	0.025056
0.2322	-0.0187735	-0.00560782	0.0261478
0.2324	-0.0186127	-0.00610219	0.0252016
0.2326	-0.0192189	-0.00571768	0.0257839
0.2328	-0.0189776	-0.00616211	0.0271486
0.233	-0.0184271	-0.00613215	0.0264026
0.2332	-0.018823	-0.00621704	0.0255291
0.2334	-0.0189343	-0.00627197	0.0257111
0.2336	-0.0188044	-0.00579259	0.0250379
0.2338	-0.0189158	-0.00591743	0.02542
0.234	-0.0187673	-0.00607223	0.0262388
0.2342	-0.0188539	-0.00574764	0.0248741
0.2344	-0.0188292	-0.0058625	0.0250924
0.2346	-0.0191075	-0.00585251	0.0260386
0.2348	-0.0190395	-0.00629694	0.025056
0.235	-0.0189838	-0.00622204	0.0252198
0.2352	-0.0186993	-0.00715085	0.0256383
0.2354	-0.0190148	-0.00688619	0.0253108
0.2356	-0.0190457	-0.00681128	0.0261296
0.2358	-0.0190642	-0.00641679	0.025511
0.236	-0.0191694	-0.00707095	0.025056
0.2362	-0.0191385	-0.00710091	0.0260386
0.2364	-0.0190704	-0.00707594	0.025147
0.2366	-0.019157	-0.00677133	0.0246921
0.2368	-0.0189343	-0.00717082	0.0260204
0.237	-0.0187735	-0.00708094	0.0256929
0.2372	-0.0192436	-0.00749541	0.02542
0.2374	-0.0187488	-0.00811461	0.0251834
0.2376	-0.0189838	-0.00827441	0.0266755
0.2378	-0.0190642	-0.00808465	0.0250015
0.238	-0.0186869	-0.00728068	0.0253108
0.2382	-0.0185941	-0.00769515	0.0258203
0.2384	-0.0188849	-0.00767018	0.0248195
0.2386	-0.0184333	-0.00711589	0.0251834
0.2388	-0.0184024	-0.00692613	0.0248195
0.239	-0.0185818	-0.0073406	0.0251288
0.2392	-0.01839	-0.00686621	0.025238
0.2394	-0.0182044	-0.00658158	0.0256929
0.2396	-0.0183962	-0.00626198	0.0260932
0.2398	-0.0181859	-0.00631691	0.0251288
0.24	-0.0183591	-0.00668145	0.0250197
0.2402	-0.0183591	-0.00645674	0.0248741
0.2404	-0.0181673	-0.00482882	0.0261114
0.2406	-0.0181797	-0.00561781	0.025511
0.2408	-0.0180869	-0.00559284	0.0252016
0.241	-0.018025	-0.0056228	0.0258021
0.2412	-0.0178766	-0.00615213	0.0247467
0.2414	-0.0182106	-0.00662652	0.0252198
0.2416	-0.0179446	-0.00552293	0.0256565
0.2418	-0.0180807	-0.0056278	0.025056
0.242	-0.0181488	-0.0060922	0.025329
0.2422	-0.0180869	-0.00594239	0.0244738
0.2424	-0.0179075	-0.00607722	0.0252016
0.2426	-0.0176848	-0.00538311	0.0251834
0.2428	-0.0176415	-0.00428951	0.0239279
0.243	-0.0181302	-0.00491371	0.0247467
0.2432	-0.0177652	-0.00517338	0.0263298
0.2434	-0.0181054	-0.00519835	0.0257293
0.2436	-0.0178085	-0.00603228	0.025147
0.2438	-0.0175302	-0.00610219	0.0255655
0.244	-0.0178333	-0.006252	0.0248741
0.2442	-0.0175116	-0.00737057	0.0259113
0.2444	-0.0174188	-0.00712588	0.0249651
0.2446	-0.0176786	-0.00809464	0.0250015
0.2448	-0.0172642	-0.0081246	0.0254382
0.245	-0.0170168	-0.00778504	0.0254564
0.2452	-0.017159	-0.00777005	0.0248013
0.2454	-0.0168621	-0.00776506	0.0254928
0.2456	-0.0171096	-0.0072657	0.0252926
0.2458	-0.0169735	-0.00631192	0.0249469
0.246	-0.0169487	-0.00696109	0.02542
0.2462	-0.0173261	-0.00633689	0.0247467
0.2464	-0.0171343	-0.00681128	0.0246375
0.2466	-0.0168065	-0.00715584	0.0258385
0.2468	-0.0171652	-0.00647671	0.0246193
0.247	-0.0170848	-0.00667645	0.0249833
0.2472	-0.0173694	-0.00627197	0.0256747
0.2474	-0.0172828	-0.00701602	0.0245647
0.2476	-0.0176353	-0.00726071	0.0245284
0.2478	-0.0175178	-0.00607722	0.0257839
0.248	-0.0176786	-0.00603228	0.0255291
0.2482	-0.0176292	-0.00594239	0.0249105
0.2484	-0.0179013	-0.00587248	0.0258749
0.2486	-0.0176972	-0.00516339	0.0239097
0.2488	-0.0178395	-0.00582754	0.0249651
0.249	-0.0180374	-0.0057826	0.0258931
0.2492	-0.0179323	-0.00594239	0.0240734
0.2494	-0.0179817	-0.00615213	0.0252016
0.2496	-0.0183591	-0.00604227	0.0256383
0.2498	-0.0180621	-0.00658657	0.0247467
0.25	-0.0181611	-0.00644175	0.0256565
0.2502	-0.0180807	-0.00595238	0.0258931
0.2504	-0.0185075	-0.00708593	0.0240734
0.2506	-0.0182168	-0.00663651	0.0250742
0.2508	-0.018322	-0.00581755	0.0248741
0.251	-0.0182848	-0.00597236	0.0260932
0.2512	-0.0183714	-0.00504354	0.0258021
0.2514	-0.0183962	-0.00539809	0.0254382
0.2516	-0.0185199	-0.00585251	0.0256019
0.2518	-0.0183962	-0.00504854	0.0255291
0.252	-0.0180621	-0.00649169	0.0259658
0.2522	-0.0181488	-0.00675635	0.0254382
0.2524	-0.0185075	-0.00628196	0.0256383
0.2526	-0.01839	-0.00706096	0.0261478
0.2528	-0.018458	-0.00670142	0.0268939
0.253	-0.0179632	-0.0067164	0.0261296
0.2532	-0.0178333	-0.00762524	0.0256747
0.2534	-0.0177529	-0.00725072	0.0238915
0.2536	-0.0180807	-0.00708593	0.0258385
0.2538	-0.0179075	-0.00677133	0.0253108
0.254	-0.0179075	-0.00627697	0.0249833
0.2542	-0.0180127	-0.00692114	0.0253654
0.2544	-0.0178395	-0.00758529	0.0243828
0.2546	-0.0181488	-0.00789989	0.0263116
0.2548	-0.018223	-0.00779502	0.0247467
0.255	-0.018056	-0.00776007	0.0258021
0.2552	-0.0181116	-0.00765021	0.0263298
0.2554	-0.018291	-0.00611218	0.0248013
0.2556	-0.0181426	-0.00678132	0.0256201
0.2558	-0.0182415	-0.00621205	0.0252016
0.256	-0.0179261	-0.00622204	0.0253472
0.2562	-0.0178395	-0.00589745	0.0252744
0.2564	-0.0181364	-0.00636685	0.0248377
0.2566	-0.0180003	-0.00602229	0.0252744
0.2568	-0.0176601	-0.00656659	0.0256383
0.257	-0.0178271	-0.0069561	0.0256019
0.2572	-0.0175797	-0.00671141	0.0253654
0.2574	-0.017623	-0.00664649	0.0253108
0.2576	-0.0179137	-0.00700603	0.0258749
0.2578	-0.0174745	-0.00752537	0.0253654
0.258	-0.0172024	-0.00747543	0.0237823
0.2582	-0.017623	-0.00702601	0.0271486
0.2584	-0.0175116	-0.0067963	0.0251652
0.2586	-0.017091	-0.00661154	0.0255837
0.2588	-0.0174869	-0.00647671	0.0256019
0.259	-0.0173632	-0.0067214	0.0251288
0.2592	-0.016856	-0.00747044	0.025511
0.2594	-0.017091	-0.00686621	0.0253836
0.2596	-0.0168003	-0.00753036	0.0256383
0.2598	-0.016856	-0.00777505	0.0247285
0.26	-0.0169859	-0.00748043	0.025329
0.2602	-0.0170106	-0.00802972	0.0252016
0.2604	-0.0170663	-0.00664649	0.0260568
0.2606	-0.0169116	-0.00658158	0.0249105
0.2608	-0.0168745	-0.00764022	0.0249651
0.261	-0.0171714	-0.00691115	0.026075
0.2612	-0.0168993	-0.0065616	0.0247285
0.2614	-0.016992	-0.00614713	0.0248195
0.2616	-0.0168683	-0.00634188	0.0256565
0.2618	-0.0172642	-0.00649169	0.0237277
0.262	-0.0168436	-0.00636186	0.0249651
0.2622	-0.0169735	-0.00540808	0.0258203
0.2624	-0.0166642	-0.00588746	0.0242554
0.2626	-0.0165714	-0.00567274	0.0251652
0.2628	-0.0166951	-0.00571269	0.0246921
0.263	-0.0169116	-0.00582255	0.0237459
0.2632	-0.0174003	-0.00457415	0.025329
0.2634	-0.0168683	-0.00431947	0.0248923
0.2636	-0.016992	-0.00435942	0.0244556
0.2638	-0.0171776	-0.00426953	0.0253472
0.264	-0.0170972	-0.0040598	0.0249287
0.2642	-0.0167322	-0.00448925	0.0251288
0.2644	-0.0167508	-0.00482882	0.0257839
0.2646	-0.0165219	-0.00494867	0.0242554
0.2648	-0.0167632	-0.00581256	0.0256383
0.265	-0.0165529	-0.00677633	0.0257657
0.2652	-0.0162065	-0.00655661	0.0245102
0.2654	-0.0164229	-0.00623702	0.0256747
0.2656	-0.0162003	-0.0068762	0.0243464
0.2658	-0.0162065	-0.00587248	0.0249651
0.266	-0.0159776	-0.00653663	0.0252562
0.2662	-0.0157611	-0.00650667	0.0249287
0.2664	-0.0158662	-0.00696608	0.0252926
0.2666	-0.0158106	-0.00783497	0.0243828
0.2668	-0.0156188	-0.00727569	0.0246739
0.267	-0.015458	-0.00756032	0.0252926
0.2672	-0.0152539	-0.00778004	0.026166
0.2674	-0.0150559	-0.00847915	0.0256019
0.2676	-0.0151734	-0.00714585	0.0239279
0.2678	-0.0151487	-0.00683126	0.0257111
0.268	-0.0149446	-0.00599732	0.0254564
0.2682	-0.0151116	-0.00614214	0.0254745
0.2684	-0.0148951	-0.00617709	0.0257839
0.2686	-0.0149322	-0.00556288	0.0256929
0.2688	-0.0147652	-0.00525827	0.0254928
0.269	-0.014827	-0.00465904	0.0248923
0.2692	-0.0148456	-0.00456416	0.0260386
0.2694	-0.014957	-0.00492869	0.0252744
0.2696	-0.0152848	-0.00461909	0.0258021
0.2698	-0.0150621	-0.00456416	0.0246921
0.27	-0.0152539	-0.00480385	0.0254018
0.2702	-0.0153961	-0.00484879	0.0259841
0.2704	-0.0155693	-0.00527325	0.0245102
0.2706	-0.0153343	-0.00455916	0.02542
0.2708	-0.0157982	-0.00390001	0.0260386
0.271	-0.0160085	-0.00459412	0.0257111
0.2712	-0.0161137	-0.00498861	0.0266209
0.2714	-0.0161755	-0.00384008	0.026075
0.2716	-0.0160518	-0.00449425	0.0261114
0.2718	-0.0166395	-0.00445929	0.0265663
0.272	-0.0162992	-0.00454918	0.0262206
0.2722	-0.0162374	-0.00457415	0.0260932
0.2724	-0.0168126	-0.00414469	0.0258567
0.2726	-0.0167384	-0.00436441	0.0262752
0.2728	-0.0168621	-0.0047639	0.0268575
0.273	-0.0165652	-0.00398989	0.0268575
0.2732	-0.0162683	-0.00409476	0.0251652
0.2734	-0.0167693	-0.00349053	0.0252198
0.2736	-0.0165281	-0.00362037	0.0264026
0.2738	-0.0168498	-0.00399489	0.0246739
0.274	-0.016856	-0.00361537	0.026257
0.2742	-0.0169982	-0.00403484	0.0263116
0.2744	-0.0171405	-0.004689	0.0261296
0.2746	-0.0172457	-0.00618209	0.0257475
0.2748	-0.0171776	-0.00565276	0.0257293
0.275	-0.01719	-0.0058625	0.0264026
0.2752	-0.0174869	-0.00615712	0.0259113
0.2754	-0.0174436	-0.00540308	0.0261842
0.2756	-0.017691	-0.00604227	0.0266937
0.2758	-0.0179755	-0.00532319	0.025511
0.276	-0.0178828	-0.00571269	0.0262206
0.2762	-0.0179817	-0.00599732	0.0264026
0.2764	-0.018124	-0.00570769	0.0250924
0.2766	-0.0179879	-0.00592242	0.025056
0.2768	-0.0180003	-0.00603228	0.0263116
0.277	-0.0182168	-0.00587248	0.0258203
0.2772	-0.0180374	-0.00604726	0.0252926
0.2774	-0.0181302	-0.00664649	0.0254018
0.2776	-0.0181611	-0.00636685	0.0268393
0.2778	-0.0181488	-0.00683625	0.0257111
0.278	-0.0181054	-0.00683625	0.0254745
0.2782	-0.0182663	-0.00647172	0.0265117
0.2784	-0.0179508	-0.00713587	0.0242736
0.2786	-0.0179694	-0.00749541	0.0264026
0.2788	-0.0181673	-0.00787492	0.0255837
0.279	-0.0178642	-0.00825443	0.0248923
0.2792	-0.0176601	-0.00778504	0.0254745
0.2794	-0.017889	-0.00744048	0.0252198
0.2796	-0.0175549	-0.0077351	0.0262752
0.2798	-0.0175116	-0.00771013	0.0252926
0.28	-0.0177158	-0.00693612	0.0252198
0.2802	-0.0174993	-0.00743548	0.0257475
0.2804	-0.017623	-0.00556787	0.0263662
0.2806	-0.0173632	-0.00592242	0.0254018
0.2808	-0.0175178	-0.00610219	0.0262752
0.281	-0.0175054	-0.00640181	0.0248013
0.2812	-0.0173199	-0.006247	0.0259476
0.2814	-0.0169426	-0.00619207	0.0259295
0.2816	-0.017091	-0.00581256	0.0247649
0.2818	-0.0170477	-0.00564278	0.025511
0.282	-0.0168745	-0.00632191	0.0257475
0.2822	-0.0169549	-0.00640181	0.0246739
0.2824	-0.0168065	-0.00617709	0.0259295
0.2826	-0.0168188	-0.00657658	0.025511
0.2828	-0.0167693	-0.00589745	0.0243828
0.283	-0.0168869	-0.00523829	0.0244556
0.2832	-0.0169549	-0.00474892	0.0258203
0.2834	-0.0164663	-0.00428951	0.0265299
0.2836	-0.0166023	-0.00500859	0.0254564
0.2838	-0.0162188	-0.00480385	0.0266573
0.284	-0.0162126	-0.00397491	0.0256747
0.2842	-0.0159961	-0.00512344	0.0252744
0.2844	-0.0163363	-0.00503356	0.0253836
0.2846	-0.0161693	-0.00379015	0.0248559
0.2848	-0.0160951	-0.00482882	0.0263116
0.285	-0.0160765	-0.0050036	0.0250197
0.2852	-0.0158291	-0.00450923	0.0254928
0.2854	-0.016058	-0.00510846	0.0255291
0.2856	-0.0155693	-0.0040648	0.0239643
0.2858	-0.0158539	-0.0035904	0.0257839
0.286	-0.016058	-0.00423957	0.025056
0.2862	-0.0158168	-0.00387005	0.024492
0.2864	-0.016058	-0.00473893	0.0256383
0.2866	-0.0160518	-0.00472895	0.0256383
0.2868	-0.0159528	-0.00435443	0.0240371
0.287	-0.0161817	-0.00402485	0.0248923
0.2872	-0.0162188	-0.0046091	0.0259658
0.2874	-0.0160271	-0.00454918	0.02542
0.2876	-0.0161322	-0.00539809	0.025329
0.2878	-0.0163054	-0.00504854	0.0266573
0.288	-0.0160765	-0.00428452	0.0261114
0.2882	-0.0161322	-0.0047639	0.0257293
0.2884	-0.0161693	-0.00386006	0.0261842
0.2886	-0.0162188	-0.00464406	0.0256383
0.2888	-0.0160023	-0.00516339	0.0265481
0.289	-0.016225	-0.00487876	0.0260568
0.2892	-0.0159466	-0.00514342	0.0264389
0.2894	-0.0162003	-0.00534815	0.0266027
0.2896	-0.0161137	-0.00581256	0.0256201
0.2898	-0.0161075	-0.00615213	0.0256565
0.29	-0.0162807	-0.00584252	0.0261478
0.2902	-0.0159714	-0.00668145	0.0260568
0.2904	-0.0162374	-0.00714086	0.0257657
0.2906	-0.0165281	-0.00603727	0.0264026
0.2908	-0.0165096	-0.0056278	0.0269484
0.291	-0.0162807	-0.00607223	0.0253108
0.2912	-0.0165096	-0.00604227	0.0264026
0.2914	-0.0164972	-0.00671141	0.0256201
0.2916	-0.0167322	-0.00588247	0.0259658
0.2918	-0.0168065	-0.00548798	0.0262388
0.292	-0.0166704	-0.00575264	0.0267301
0.2922	-0.0165714	-0.00540808	0.0260932
0.2924	-0.0168683	-0.00552293	0.0250015
0.2926	-0.0166827	-0.00526326	0.0265663
0.2928	-0.016992	-0.00442933	0.0266027
0.293	-0.017159	-0.00510347	0.0276217
0.2932	-0.0168931	-0.00469899	0.0249469
0.2934	-0.0172024	-0.00463906	0.026257
0.2936	-0.0169611	-0.00528324	0.0260386
0.2938	-0.0170663	-0.00525328	0.0266755
0.294	-0.0173199	-0.00533817	0.0267847
0.2942	-0.0174745	-0.00549796	0.0257475
0.2944	-0.0171714	-0.00599732	0.0260932
0.2946	-0.0173632	-0.00591243	0.0264753
0.2948	-0.0174931	-0.0049986	0.0261842
0.295	-0.0173508	-0.00493368	0.0264389
0.2952	-0.0176663	-0.00439937	0.0256747
0.2954	-0.0174931	-0.00398989	0.0252562
0.2956	-0.0175302	-0.00417466	0.0274761
0.2958	-0.0177405	-0.00449924	0.0259113
0.296	-0.0175302	-0.00386505	0.0261842
0.2962	-0.0177405	-0.0035155	0.0270212
0.2964	-0.0177652	-0.00319092	0.0264389
0.2966	-0.0175735	-0.00451922	0.0256565
0.2968	-0.0177467	-0.00464406	0.0275671
0.297	-0.0176539	-0.00486377	0.0260568
0.2972	-0.0176044	-0.00504354	0.0257111
0.2974	-0.0174374	-0.00467402	0.0254928
0.2976	-0.0175302	-0.00542805	0.0266755
0.2978	-0.0173508	-0.00528324	0.0256747
0.298	-0.0175364	-0.00496864	0.0259113
0.2982	-0.017592	-0.00506352	0.0264207
0.2984	-0.0173941	-0.00517338	0.0256747
0.2986	-0.0170353	-0.00487376	0.0262752
0.2988	-0.0175364	-0.00587248	0.0253108
0.299	-0.0174374	-0.00565776	0.0255291
0.2992	-0.0174498	-0.00632191	0.0256747
0.2994	-0.0174374	-0.00629195	0.0256747
0.2996	-0.0169735	-0.00599732	0.0269666
0.2998	-0.0170168	-0.0067963	0.0255291
0.3	-0.0168807	-0.00766019	0.0251652
0.3002	-0.016924	-0.00712588	0.0259658
0.3004	-0.0168065	-0.00629694	0.0269302
0.3006	-0.016726	-0.00652165	0.0258203
0.3008	-0.016491	-0.0064867	0.0254745
0.301	-0.0166518	-0.00636186	0.0254018
0.3012	-0.0164724	-0.00618209	0.0254564
0.3014	-0.0167199	-0.00589246	0.0251652
0.3016	-0.0167137	-0.00678631	0.0251834
0.3018	-0.0162498	-0.00709592	0.0257475
0.302	-0.0166766	-0.00749541	0.0254564
0.3022	-0.016491	-0.00798977	0.026257
0.3024	-0.0165096	-0.00690117	0.0250015
0.3026	-0.0163116	-0.00661154	0.0262934
0.3028	-0.0163735	-0.00689617	0.025056
0.303	-0.0163363	-0.00605725	0.0248741
0.3032	-0.0167755	-0.00550296	0.0258385
0.3034	-0.016126	-0.00574265	0.0256201
0.3036	-0.016324	-0.00560782	0.0258385
0.3038	-0.0165529	-0.00639681	0.0257111
0.304	-0.0163178	-0.00666647	0.02542
0.3042	-0.0163487	-0.00542805	0.0258203
0.3044	-0.016225	-0.00566275	0.0262388
0.3046	-0.0163116	-0.00544803	0.0252198
0.3048	-0.0162683	-0.00544303	0.0251834
0.305	-0.0164786	-0.00623202	0.0254928
0.3052	-0.0163982	-0.00594739	0.0254745
0.3054	-0.0165776	-0.00539809	0.0256201
0.3056	-0.0165652	-0.00518337	0.02542
0.3058	-0.0166704	-0.00503356	0.025511
0.306	-0.016856	-0.00478388	0.0257839
0.3062	-0.0167632	-0.00547799	0.0255837
0.3064	-0.017091	-0.00588746	0.0246193
0.3066	-0.0172828	-0.00573266	0.0260204
0.3068	-0.0174312	-0.00573266	0.0257111
0.307	-0.0175302	-0.00590244	0.0249287
0.3072	-0.0174869	-0.00545302	0.0260386
0.3074	-0.017691	-0.00617709	0.0257657
0.3076	-0.0177405	-0.00543305	0.0248377
0.3078	-0.0177714	-0.00568273	0.0254018
0.308	-0.0175982	-0.00519335	0.0257657
0.3082	-0.017889	-0.00395993	0.025329
0.3084	-0.0176168	-0.00387504	0.0253472
0.3086	-0.0177652	-0.0046091	0.0265117
0.3088	-0.0180003	-0.00472895	0.0258749
0.309	-0.0179384	-0.00560782	0.0254018
0.3092	-0.0181302	-0.00538311	0.0261114
0.3094	-0.0181797	-0.00550795	0.0256383
0.3096	-0.0179879	-0.00508849	0.0265663
0.3098	-0.0180683	-0.0039849	0.025511
0.31	-0.0181921	-0.00463407	0.0261114
0.3102	-0.0176539	-0.0044543	0.0261296
0.3104	-0.017957	-0.00483881	0.0246193
0.3106	-0.0181488	-0.00465404	0.0254018
0.3108	-0.0178271	-0.00464905	0.0262388
0.311	-0.0180683	-0.00481883	0.0253654
0.3112	-0.0180188	-0.00568273	0.0268393
0.3114	-0.0181054	-0.00551794	0.0254928
0.3116	-0.0182787	-0.00597735	0.0271486
0.3118	-0.0182601	-0.0057776	0.0266391
0.312	-0.0179508	-0.00631691	0.0268029
0.3122	-0.0184024	-0.00702101	0.0257657
0.3124	-0.018557	-0.00737556	0.0260386
0.3126	-0.0184828	-0.00716583	0.0265845
0.3128	-0.0187549	-0.00729566	0.0262934
0.313	-0.0181549	-0.0072657	0.0276217
0.3132	-0.0180869	-0.00784496	0.0254564
0.3134	-0.0185137	-0.00733062	0.0253472
0.3136	-0.0183591	-0.00756532	0.0252744
0.3138	-0.0184518	-0.00826942	0.0256929
0.314	-0.0186622	-0.00787492	0.0259841
0.3142	-0.0182787	-0.00811461	0.0252926
0.3144	-0.0182292	-0.00827441	0.0250015
0.3146	-0.0184024	-0.00888862	0.0254382
0.3148	-0.0185941	-0.00777005	0.0246739
0.315	-0.0186065	-0.00715584	0.0260386
0.3152	-0.0185879	-0.00798478	0.026075
0.3154	-0.0185694	-0.00729566	0.02542
0.3156	-0.0188415	-0.00763523	0.0265117
0.3158	-0.0184704	-0.00700104	0.0256929
0.316	-0.0182539	-0.00656659	0.0261114
0.3162	-0.0183467	-0.00610219	0.0261478
0.3164	-0.0182601	-0.00610718	0.0256201
0.3166	-0.018223	-0.00607722	0.0256019
0.3168	-0.0184457	-0.0067164	0.0264753
0.317	-0.0180683	-0.00743548	0.0258385
0.3172	-0.0180621	-0.00683126	0.0264935
0.3174	-0.0179137	-0.00626198	0.0257657
0.3176	-0.0178642	-0.00590244	0.026257
0.3178	-0.0177962	-0.00588746	0.0263662
0.318	-0.018025	-0.00525328	0.0248741
0.3182	-0.0174869	-0.00502357	0.0267665
0.3184	-0.0175178	-0.00548298	0.0262752
0.3186	-0.0176168	-0.00541307	0.0256019
0.3188	-0.0173384	-0.00600731	0.0250379
0.319	-0.0176044	-0.00598234	0.0264026
0.3192	-0.0174127	-0.0055479	0.0264389
0.3194	-0.017425	-0.00591243	0.0254928
0.3196	-0.0174312	-0.00614214	0.0255291
0.3198	-0.0172766	-0.00529822	0.0254018
0.32	-0.017623	-0.00564777	0.0258931
0.3202	-0.0174312	-0.00564777	0.0265299
0.3204	-0.0172395	-0.00511845	0.0259476
0.3206	-0.0171034	-0.00605725	0.0254018
0.3208	-0.0172147	-0.00579758	0.0258385
0.321	-0.0168993	-0.00561781	0.0260386
0.3212	-0.0170786	-0.00597236	0.0244738
0.3214	-0.0168498	-0.00621704	0.0259658
0.3216	-0.0167755	-0.00707095	0.0249833
0.3218	-0.0169797	-0.0073406	0.0254564
0.322	-0.0171219	-0.00722076	0.0256929
0.3222	-0.0166333	-0.0071858	0.025511
0.3224	-0.0167446	-0.00785495	0.0255291
0.3226	-0.016726	-0.00727069	0.0250924
0.3228	-0.0166271	-0.00706096	0.0249105
0.323	-0.0172766	-0.0072657	0.0239643
0.3232	-0.0169426	-0.00713087	0.0257293
0.3234	-0.0168621	-0.00692114	0.0257475
0.3236	-0.0168931	-0.00622204	0.0256019
0.3238	-0.0167137	-0.00688619	0.0262934
0.324	-0.0168374	-0.00647671	0.0245102
0.3242	-0.0166827	-0.00631691	0.0255655
0.3244	-0.0166209	-0.00673138	0.0248013
0.3246	-0.016726	-0.00709092	0.0258749
0.3248	-0.0163673	-0.0071908	0.0254745
0.325	-0.0163611	-0.00610718	0.0255291
0.3252	-0.0163673	-0.00718081	0.025147
0.3254	-0.0160704	-0.00638183	0.0250379
0.3256	-0.016324	-0.00572267	0.0244374
0.3258	-0.0159652	-0.00604227	0.0253836
0.326	-0.0159776	-0.00635686	0.0254928
0.3262	-0.0162992	-0.00592242	0.0252562
0.3264	-0.0161013	-0.00660155	0.0258749
0.3266	-0.016392	-0.00616711	0.0258385
0.3268	-0.0164106	-0.00592242	0.0249651
0.327	-0.0166951	-0.00775507	0.0250742
0.3272	-0.0167013	-0.00721077	0.0257475
0.3274	-0.0168374	-0.00702101	0.0254928
0.3276	-0.0167817	-0.00698106	0.0256201
0.3278	-0.0171467	-0.00606723	0.0257839
0.328	-0.0169735	-0.00662152	0.0252198
0.3282	-0.0172024	-0.00606224	0.0261842
0.3284	-0.0173013	-0.00612216	0.0261296
0.3286	-0.0173384	-0.0058575	0.0259113
0.3288	-0.0174498	-0.0063319	0.0265117
0.329	-0.0171281	-0.00589246	0.0260386
0.3292	-0.0175982	-0.00683126	0.0261478
0.3294	-0.0171405	-0.00664649	0.0262752
0.3296	-0.0175178	-0.00610219	0.0261478
0.3298	-0.0174869	-0.00600232	0.0256747
0.33	-0.0174993	-0.00685622	0.0264935
0.3302	-0.0175054	-0.00617709	0.0265117
0.3304	-0.0173446	-0.00671141	0.0251652
0.3306	-0.0172147	-0.00691115	0.026257
0.3308	-0.0174003	-0.00663651	0.0252198
0.331	-0.0172209	-0.00738555	0.0263298
0.3312	-0.0174621	-0.00595238	0.0262752
0.3314	-0.0175487	-0.00720078	0.0267301
0.3316	-0.0173322	-0.00713587	0.0264026
0.3318	-0.0173322	-0.00681128	0.0265117
0.332	-0.0174683	-0.00721576	0.0259476
0.3322	-0.0170972	-0.0072657	0.0265299
0.3324	-0.0173817	-0.00709092	0.0261114
0.3326	-0.0172395	-0.00704598	0.0258385
0.3328	-0.0173508	-0.00707095	0.0275489
0.333	-0.0169364	-0.00738555	0.0269848
0.3332	-0.0165776	-0.0068712	0.0260386
0.3334	-0.0166518	-0.00683625	0.025329
0.3336	-0.0168003	-0.00670642	0.0254745
0.3338	-0.0170168	-0.00658158	0.0264935
0.334	-0.0165838	-0.006252	0.0262752
0.3342	-0.01659	-0.00690117	0.0254745
0.3344	-0.0165838	-0.00688619	0.0269302
0.3346	-0.0166147	-0.00626198	0.0256383
0.3348	-0.016658	-0.00606723	0.0253108
0.335	-0.0166085	-0.00602229	0.0268211
0.3352	-0.0166209	-0.00636685	0.0252744
0.3354	-0.0167322	-0.0073456	0.0267665
0.3356	-0.0166085	-0.00762025	0.0261296
0.3358	-0.0165405	-0.00724073	0.0257293
0.336	-0.0168188	-0.00810463	0.0261842
0.3362	-0.0165962	-0.00768516	0.026166
0.3364	-0.0165343	-0.00809963	0.026075
0.3366	-0.0166518	-0.00826942	0.0263662
0.3368	-0.0166209	-0.00756532	0.0261296
0.337	-0.0166147	-0.00794982	0.027003
0.3372	-0.0168931	-0.00711589	0.0262752
0.3374	-0.0171467	-0.00713087	0.0251834
0.3376	-0.0168374	-0.00631691	0.0265117
0.3378	-0.0167632	-0.00626198	0.0255837
0.338	-0.0170291	-0.00668644	0.0255291
0.3382	-0.0171096	-0.00706596	0.0261114
0.3384	-0.0170353	-0.00697607	0.0256929
0.3386	-0.0168745	-0.00794982	0.0266027
0.3388	-0.0169178	-0.00824944	0.0255837
0.339	-0.0170539	-0.0075004	0.0259295
0.3392	-0.016924	-0.00635187	0.0266209
0.3394	-0.016924	-0.00619207	0.0256565
0.3396	-0.0169982	-0.0064068	0.0265299
0.3398	-0.0170539	-0.00704099	0.0260204
0.34	-0.0169982	-0.00720078	0.0257293
0.3402	-0.0170044	-0.00715085	0.0268393
0.3404	-0.0170106	-0.00638183	0.0260386
0.3406	-0.017023	-0.00751538	0.0257657
0.3408	-0.0170972	-0.00637684	0.0265299
0.341	-0.0168374	-0.0061721	0.0254745
0.3412	-0.0167817	-0.00594239	0.0266573
0.3414	-0.0168745	-0.00547299	0.0253108
0.3416	-0.0169116	-0.00613714	0.0258931
0.3418	-0.016992	-0.00585251	0.0262206
0.342	-0.0170539	-0.00531819	0.0259295
0.3422	-0.0169673	-0.00602229	0.0257475
0.3424	-0.0173199	-0.00627197	0.0257293
0.3426	-0.0170353	-0.00629195	0.0251288
0.3428	-0.0173446	-0.00676135	0.0256565
0.343	-0.0176972	-0.0065616	0.0246739
0.3432	-0.0178209	-0.00697108	0.0264753
0.3434	-0.0175859	-0.0069561	0.0260204
0.3436	-0.0176539	-0.00561282	0.0272032
0.3438	-0.0175673	-0.00576762	0.0253108
0.344	-0.0177838	-0.00639681	0.025329
0.3442	-0.0177034	-0.00641179	0.0254018
0.3444	-0.0175426	-0.00606723	0.0254928
0.3446	-0.0175178	-0.00618708	0.0255291
0.3448	-0.0175054	-0.00641679	0.0250742
0.345	-0.0171219	-0.00516339	0.0255291
0.3452	-0.0174312	-0.00699105	0.0264389
0.3454	-0.0171343	-0.00684624	0.0249651
0.3456	-0.0169982	-0.00622204	0.0259476
0.3458	-0.0174188	-0.00644675	0.0259658
0.346	-0.0171838	-0.0074205	0.0252744
0.3462	-0.0169735	-0.00756032	0.0256383
0.3464	-0.016825	-0.00755533	0.0256565
0.3466	-0.0165405	-0.00741051	0.025056
0.3468	-0.0168126	-0.00730066	0.0260568
0.347	-0.0166271	-0.00712089	0.0254564
0.3472	-0.0167632	-0.00598234	0.0260932
0.3474	-0.0165962	-0.0064068	0.0252926
0.3476	-0.0166333	-0.00690616	0.0253472
0.3478	-0.016992	-0.00623702	0.0251834
0.348	-0.0165529	-0.0060972	0.0260204
0.3482	-0.0166827	-0.00633689	0.0264935
0.3484	-0.0169735	-0.0065616	0.0258021
0.3486	-0.0166147	-0.0069561	0.0258203
0.3488	-0.016726	-0.00704099	0.026257
0.349	-0.0162559	-0.00620705	0.0252016
0.3492	-0.016825	-0.00676634	0.0265117
0.3494	-0.0164724	-0.00611717	0.0258203
0.3496	-0.0166889	-0.00582754	0.0258931
0.3498	-0.016658	-0.00630193	0.0257657
0.35	-0.0166827	-0.00541307	0.0257657
0.3502	-0.0163487	-0.00565276	0.026075
0.3504	-0.01659	-0.00692613	0.0259295
0.3506	-0.0165405	-0.00645174	0.0248559
0.3508	-0.0161075	-0.00631691	0.0266391
0.351	-0.0165776	-0.00544303	0.0266755
0.3512	-0.0162683	-0.00608221	0.0267301
0.3514	-0.0158477	-0.00591743	0.0269666
0.3516	-0.0164168	-0.00591243	0.0262752
0.3518	-0.0161013	-0.00571768	0.0268575
0.352	-0.0159899	-0.00610718	0.0262206
0.3522	-0.0162065	-0.0052333	0.0251834
0.3524	-0.0160951	-0.00560283	0.0272578
0.3526	-0.0162559	-0.0055479	0.0263662
0.3528	-0.0165529	-0.0052333	0.026348
0.353	-0.0160147	-0.00599732	0.0271122
0.3532	-0.0160394	-0.00550296	0.0257111
0.3534	-0.0162559	-0.00569771	0.02542
0.3536	-0.0164786	-0.00528324	0.0265481
0.3538	-0.016392	-0.00563778	0.0259113
0.354	-0.0164786	-0.00565276	0.0264935
0.3542	-0.0164972	-0.00581755	0.0267119
0.3544	-0.0167384	-0.006247	0.0258931
0.3546	-0.0167632	-0.00627697	0.0264207
0.3548	-0.0165219	-0.00511845	0.026257
0.355	-0.0169487	-0.00517338	0.0262388
0.3552	-0.0168869	-0.00590244	0.0259841
0.3554	-0.0167755	-0.00592242	0.0257657
0.3556	-0.0170786	-0.00667645	0.0274579
0.3558	-0.0170663	-0.00678132	0.0252562
0.356	-0.0169302	-0.0067963	0.026166
0.3562	-0.0170848	-0.00678132	0.0261114
0.3564	-0.0168683	-0.00690117	0.02542
0.3566	-0.0168807	-0.00706096	0.0267847
0.3568	-0.0169673	-0.0068762	0.0261296
0.357	-0.0168498	-0.00631192	0.0269484
0.3572	-0.0170291	-0.00628695	0.0263844
0.3574	-0.0170168	-0.0064068	0.0256929
0.3576	-0.017091	-0.0063319	0.0261296
0.3578	-0.0168436	-0.00612216	0.0264026
0.358	-0.0170786	-0.00617709	0.0251288
0.3582	-0.0167817	-0.00616711	0.0271486
0.3584	-0.0168436	-0.00584752	0.0254382
0.3586	-0.016924	-0.00606723	0.0265481
0.3588	-0.0166889	-0.00655161	0.0252016
0.359	-0.016157	-0.00670642	0.0264935
0.3592	-0.016293	-0.0063269	0.0259841
0.3594	-0.0161199	-0.00592242	0.0255837
0.3596	-0.0162621	-0.00475391	0.0261114
0.3598	-0.0162498	-0.00566775	0.0255837
0.36	-0.0157363	-0.00525328	0.0255655
0.3602	-0.015693	-0.00543804	0.025511
0.3604	-0.0158724	-0.00426953	0.0261296
0.3606	-0.0156683	-0.00467402	0.0260204
0.3608	-0.0158786	-0.00536813	0.0260568
0.361	-0.015724	-0.00548298	0.025147
0.3612	-0.0153405	-0.00578759	0.0255291
0.3614	-0.015693	-0.00655661	0.0249105
0.3616	-0.0153714	-0.00552293	0.0245102
0.3618	-0.0151302	-0.00519835	0.026075
0.362	-0.0153466	-0.00600232	0.0254928
0.3622	-0.0154704	-0.00554291	0.0247285
0.3624	-0.0154889	-0.00527824	0.0257475
0.3626	-0.015458	-0.00588746	0.0246921
0.3628	-0.015359	-0.00580757	0.0247831
0.363	-0.0154704	-0.00635686	0.0253836
0.3632	-0.0159157	-0.00706596	0.0248377
0.3634	-0.0154332	-0.00675136	0.0257475
0.3636	-0.0155384	-0.00729566	0.0262388
0.3638	-0.0154951	-0.0075803	0.0251652
0.364	-0.0149322	-0.00688619	0.0253654
0.3642	-0.0152415	-0.00744547	0.0262388
0.3644	-0.0150683	-0.0071908	0.0256383
0.3646	-0.0149137	-0.00696608	0.0248559
0.3648	-0.0149322	-0.00795981	0.0257111
0.365	-0.0148518	-0.00809963	0.0249833
0.3652	-0.0147961	-0.00730066	0.0251288
0.3654	-0.0148703	-0.00708094	0.0259476
0.3656	-0.0146291	-0.00690616	0.0247103
0.3658	-0.0148518	-0.00671141	0.0248559
0.366	-0.0147281	-0.00794483	0.0250924
0.3662	-0.0146848	-0.0075753	0.0249833
0.3664	-0.0146724	-0.00651666	0.0255837
0.3666	-0.0145054	-0.00700104	0.0255837
0.3668	-0.0146353	-0.00650168	0.0254928
0.367	-0.0148209	-0.00559284	0.026166
0.3672	-0.0149879	-0.00578759	0.0254564
0.3674	-0.0148518	-0.00507351	0.0252562
0.3676	-0.0146848	-0.00587748	0.0262024
0.3678	-0.0148209	-0.00607223	0.0255655
0.368	-0.0149817	-0.00594739	0.0256929
0.3682	-0.0152724	-0.00610219	0.0260386
0.3684	-0.0152601	-0.00644175	0.0253108
0.3686	-0.0153405	-0.00707594	0.0253472
0.3688	-0.0154827	-0.0063269	0.0254564
0.369	-0.0153343	-0.00665648	0.025329
0.3692	-0.0158044	-0.00597735	0.0249651
0.3694	-0.0157487	-0.00597236	0.0248013
0.3696	-0.0158477	-0.0059374	0.0249287
0.3698	-0.0158786	-0.006247	0.0260568
0.37	-0.0160085	-0.00596237	0.0260204
0.3702	-0.0158477	-0.00654662	0.025329
0.3704	-0.0161817	-0.00674137	0.0257293
0.3706	-0.0161508	-0.00679131	0.0253108
0.3708	-0.0161941	-0.00669143	0.0251834
0.371	-0.0159281	-0.00653164	0.0259113
0.3712	-0.0159899	-0.00666147	0.026348
0.3714	-0.0158972	-0.00653164	0.0248377
0.3716	-0.0164291	-0.00677633	0.0256929
0.3718	-0.0162188	-0.00629694	0.0256019
0.372	-0.016157	-0.0057027	0.0260932
0.3722	-0.016157	-0.00625699	0.0262752
0.3724	-0.0160332	-0.0053132	0.0254018
0.3726	-0.0161879	-0.00580757	0.025511
0.3728	-0.0160394	-0.00661653	0.0262934
0.373	-0.0159776	-0.00654163	0.0265117
0.3732	-0.0155137	-0.00714585	0.0248923
0.3734	-0.0158848	-0.0071109	0.025147
0.3736	-0.0161384	-0.00590244	0.026348
0.3738	-0.0161941	-0.006252	0.02542
0.374	-0.0161632	-0.00545801	0.0258203
0.3742	-0.0164786	-0.00530321	0.0247103
0.3744	-0.0162559	-0.00550795	0.0247103
0.3746	-0.0161137	-0.00501358	0.0260204
0.3748	-0.0164106	-0.00440436	0.0247831
0.375	-0.0166209	-0.00456915	0.0260568
0.3752	-0.0163425	-0.00497363	0.0250742
0.3754	-0.0164601	-0.00469399	0.0258021
0.3756	-0.0168993	-0.00488375	0.0255655
0.3758	-0.0165281	-0.00472395	0.0256383
0.376	-0.016825	-0.00470897	0.0259658
0.3762	-0.0167013	-0.00450423	0.0257839
0.3764	-0.0166518	-0.00495366	0.0257475
0.3766	-0.0169735	-0.00600232	0.0263298
0.3768	-0.0168683	-0.00637184	0.0256201
0.377	-0.016658	-0.00701103	0.0254745
0.3772	-0.0168065	-0.00642178	0.0258385
0.3774	-0.0166704	-0.00638682	0.0254928
0.3776	-0.0166395	-0.00571269	0.0246375
0.3778	-0.016825	-0.00478388	0.0254564
0.378	-0.016856	-0.00546301	0.0251834
0.3782	-0.0164663	-0.00548798	0.0260204
0.3784	-0.0168374	-0.00532319	0.0259476
0.3786	-0.0163858	-0.00527824	0.025238
0.3788	-0.0163054	-0.00543305	0.0252926
0.379	-0.0166023	-0.0058575	0.026257
0.3792	-0.0160951	-0.00572767	0.0252744
0.3794	-0.0162188	-0.00595737	0.0242372
0.3796	-0.0163673	-0.0063269	0.0255291
0.3798	-0.0161199	-0.0065616	0.0242736
0.38	-0.0159899	-0.00666647	0.0259841
0.3802	-0.016225	-0.00634688	0.025329
0.3804	-0.0159281	-0.00519335	0.0251834
0.3806	-0.0159095	-0.00581256	0.026075
0.3808	-0.0158291	-0.00638183	0.0256019
0.381	-0.015526	-0.00623702	0.02431
0.3812	-0.0155075	-0.00618209	0.0256201
0.3814	-0.0152353	-0.00674636	0.0250742
0.3816	-0.015359	-0.00536314	0.0259658
0.3818	-0.0154332	-0.00604227	0.0254928
0.382	-0.0150869	-0.0053132	0.0250742
0.3822	-0.0152662	-0.00540308	0.0246739
0.3824	-0.015359	-0.0060173	0.0252016
0.3826	-0.0152848	-0.00482383	0.0255291
0.3828	-0.0148209	-0.00526326	0.0243828
0.383	-0.0150435	-0.00613714	0.0246739
0.3832	-0.0153034	-0.00670642	0.0249833
0.3834	-0.0154765	-0.00536314	0.0263662
0.3836	-0.015291	-0.00595737	0.0254745
0.3838	-0.0151796	-0.0060123	0.025147
0.384	-0.0152848	-0.00603727	0.0252198
0.3842	-0.0150559	-0.0067214	0.0258749
0.3844	-0.0151487	-0.006252	0.0247467
0.3846	-0.0151796	-0.00658657	0.0253472
0.3848	-0.0150312	-0.00793984	0.0249469
0.385	-0.015124	-0.00736557	0.0247831
0.3852	-0.0147776	-0.00655661	0.0249651
0.3854	-0.0149879	-0.00694611	0.0266209
0.3856	-0.0148889	-0.00646173	0.0239097
0.3858	-0.0149693	-0.006247	0.026075
0.386	-0.0153838	-0.00635187	0.0249469
0.3862	-0.0150435	-0.00650667	0.0244556
0.3864	-0.0149446	-0.00680629	0.0252744
0.3866	-0.0150126	-0.00662652	0.025329
0.3868	-0.0148394	-0.00661154	0.02431
0.387	-0.0149817	-0.00724073	0.0252926
0.3872	-0.014759	-0.00691615	0.025511
0.3874	-0.0147157	-0.00768516	0.0249651
0.3876	-0.0146538	-0.00760027	0.0259658
0.3878	-0.0145734	-0.00725571	0.0248559
0.388	-0.0146229	-0.00707095	0.025147
0.3882	-0.0145363	-0.00651666	0.0259841
0.3884	-0.0147899	-0.00640181	0.0254745
0.3886	-0.014926	-0.00635686	0.0249105
0.3888	-0.014858	-0.00711589	0.0264935
0.389	-0.0145734	-0.0064817	0.0258931
0.3892	-0.0149446	-0.00725072	0.025238
0.3894	-0.0149075	-0.00727569	0.0262752
0.3896	-0.0151549	-0.00641179	0.0262388
0.3898	-0.0149508	-0.00700603	0.0248013
0.39	-0.0148642	-0.00598734	0.0264389
0.3902	-0.0150188	-0.00645174	0.026348
0.3904	-0.0147961	-0.00667645	0.0249833
0.3906	-0.0152291	-0.00651167	0.025329
0.3908	-0.0150374	-0.00551294	0.0257111
0.391	-0.015025	-0.00544803	0.0261478
0.3912	-0.0153157	-0.00582255	0.0260386
0.3914	-0.0150869	-0.00624201	0.0259658
0.3916	-0.0149693	-0.00629694	0.026348
0.3918	-0.0151302	-0.00568772	0.0257839
0.392	-0.0150064	-0.00582754	0.0258567
0.3922	-0.0148518	-0.0061721	0.0259658
0.3924	-0.0150683	-0.00618209	0.0258203
0.3926	-0.0149384	-0.00579259	0.0261296
0.3928	-0.0146415	-0.00637684	0.0266391
0.393	-0.0147961	-0.0057027	0.0264389
0.3932	-0.0141466	-0.00595238	0.0256383
0.3934	-0.014592	-0.00665648	0.0247831
0.3936	-0.0147343	-0.00666647	0.025056
0.3938	-0.0146167	-0.00625699	0.0256747
0.394	-0.0146044	-0.00537312	0.0257475
0.3942	-0.0148023	-0.00474892	0.0264753
0.3944	-0.0145178	-0.00543305	0.0247285
0.3946	-0.0141899	-0.00580257	0.0252198
0.3948	-0.0144992	-0.00578759	0.0260932
0.395	-0.0139363	-0.00545302	0.0247103
0.3952	-0.0141899	-0.0057826	0.0257475
0.3954	-0.0142703	-0.00470398	0.0269484
0.3956	-0.0141961	-0.00555789	0.0258931
0.3958	-0.0141342	-0.00553292	0.026348
0.396	-0.01406	-0.00655161	0.0253654
0.3962	-0.0140848	-0.00657159	0.0255655
0.3964	-0.0144497	-0.0066415	0.0264389
0.3966	-0.0142641	-0.00603727	0.0258021
0.3968	-0.0144064	-0.00677633	0.0259113
0.397	-0.0143384	-0.00634688	0.025511
0.3972	-0.0141652	-0.00660654	0.0254928
0.3974	-0.014227	-0.00810962	0.0258021
0.3976	-0.0145549	-0.00744547	0.0255837
0.3978	-0.01466	-0.00728068	0.0261114
0.398	-0.014524	-0.00735059	0.0250015
0.3982	-0.0145425	-0.00777505	0.0270212
0.3984	-0.0142518	-0.00751538	0.0260204
0.3986	-0.0145549	-0.00694112	0.0255291
0.3988	-0.0145796	-0.00625699	0.0248013
0.399	-0.0143198	-0.00771512	0.0256019
0.3992	-0.014524	-0.00712588	0.0260932
0.3994	-0.0143136	-0.00752537	0.0259295
[truncated: 35,500 more rows]

## Sheet: Fig.S1B
	MMTV-PyMT BK-KO
Time (sec)	ctrl	+ PAX	+ IBTX
0	-0.0109509	0.00198924	0.00450616
0.0002	-0.0110999	0.00147782	0.00406877
0.0004	-0.011102	0.00191452	0.00397706
0.0006	-0.0108502	0.00126029	0.00362433
0.0008	-0.0110432	0.00142966	0.00424161
0.001	-0.0109257	0.0012935	0.00408641
0.0012	-0.01106	0.0021885	0.00356965
0.0014	-0.0111817	0.00116897	0.00282186
0.0016	-0.0110453	0.00154756	0.00329629
0.0018	-0.0110789	0.00182984	0.00506877
0.002	-0.0110265	0.00145623	0.00460493
0.0022	-0.0108418	0.0018564	0.00413403
0.0024	-0.0109195	0.00199422	0.00476365
0.0026	-0.0111104	0.00172523	0.00446912
0.0028	-0.0109614	0.00218019	0.00443914
0.003	-0.0110453	0.00208887	0.00455907
0.0032	-0.0110034	0.00169368	0.00403879
0.0034	-0.0104978	0.00220178	0.00406524
0.0036	-0.010739	0.00217687	0.00416754
0.0038	-0.0108859	0.00119056	0.00424514
0.004	-0.0107327	0.00118557	0.00389946
0.0042	-0.0108523	0.00186803	0.0040335
0.0044	-0.0108439	0.00191784	0.00445325
0.0046	-0.0106551	0.00291578	0.00347265
0.0048	-0.0109698	0.0024741	0.003291
0.005	-0.0106992	0.00216193	0.00397177
0.0052	-0.0108062	0.0015459	0.003582
0.0054	-0.0110181	0.00132671	0.00475484
0.0056	-0.0109027	0.00238443	0.00364549
0.0058	-0.0108209	0.00173519	0.00365607
0.006	-0.0108481	0.00146287	0.00508641
0.0062	-0.0106719	0.00164386	0.00399823
0.0064	-0.0109488	0.00199754	0.00390122
0.0066	-0.0110076	0.00256376	0.00405819
0.0068	-0.0107852	0.0011972	0.00381128
0.007	-0.0109111	0.00090994	0.00427688
0.0072	-0.0108922	0.00162892	0.00439329
0.0074	-0.0107957	0.00172855	0.00439152
0.0076	-0.0107579	0.00175179	0.00392591
0.0078	-0.0106677	0.00199588	0.0040723
0.008	-0.0105628	0.0021885	0.00464902
0.0082	-0.0105104	0.00147283	0.00378129
0.0084	-0.0108314	0.00190622	0.00464196
0.0086	-0.0105817	0.00203905	0.00380246
0.0088	-0.0104894	0.00146121	0.00410404
0.009	-0.0107684	0.00159571	0.00379893
0.0092	-0.010395	0.00182817	0.00419576
0.0094	-0.0108041	0.00165217	0.00443209
0.0096	-0.0106467	0.00129516	0.00407406
0.0098	-0.0107684	0.00054131	0.00433156
0.01	-0.0106153	0.00186138	0.00448147
0.0102	-0.0106866	0.00119886	0.00422926
0.0104	-0.0107432	0.00142136	0.00441445
0.0106	-0.0110432	0.00158077	0.00496119
0.0108	-0.0104663	0.00108096	0.00398059
0.011	-0.0105628	0.00094813	0.00467018
0.0112	-0.0108104	0.0014828	0.00377953
0.0114	-0.0105964	0.00131343	0.00510757
0.0116	-0.0107537	0.00094481	0.00506348
0.0118	-0.0107244	0.00112082	0.00371604
0.012	-0.0107181	0.00061437	0.00353791
0.0122	-0.010739	0.00115402	0.00418694
0.0124	-0.0108293	0.00085348	0.00473367
0.0126	-0.0105796	0.00119222	0.00417812
0.0128	-0.0107642	0.00104776	0.00427865
0.013	-0.0106027	0.00143298	0.00369135
0.0132	-0.0104894	0.00143963	0.00413755
0.0134	-0.0113076	0.00040681	0.0046014
0.0136	-0.0107915	0.00101122	0.00392768
0.0138	-0.0109341	0.00110753	0.00432803
0.014	-0.0109929	0.00100956	0.00471956
0.0142	-0.0109069	0.00124535	0.0041887
0.0144	-0.0111104	0.00097802	0.00453967
0.0146	-0.0112719	0.00025737	0.0043439
0.0148	-0.0110453	0.00130347	0.00409346
0.015	-0.0112027	-3.1549e-05	0.00410581
0.0152	-0.0112006	0.00071898	0.00433861
0.0154	-0.0110181	0.00053301	0.00444443
0.0156	-0.011295	0.00017601	0.00441269
0.0158	-0.0110852	0.00066087	0.00427512
0.016	-0.0110265	0.00080201	0.00440387
0.0162	-0.0112027	0.00058781	0.00365784
0.0164	-0.010909	-0.00046659	0.00428394
0.0166	-0.0111334	-0.00064924	0.00454496
0.0168	-0.0112111	0.00095311	0.00383244
0.017	-0.0111125	0.00100126	0.00481656
0.0172	-0.0111817	-9.6307e-05	0.00362962
0.0174	-0.0113076	0.00065422	0.00425925
0.0176	-0.0113265	0.00056954	0.00458552
0.0178	-0.0111586	0.00027066	0.00408464
0.018	-0.011295	0.00125531	0.00455202
0.0182	-0.0112236	0.00105606	0.00339152
0.0184	-0.0111523	0.00023745	0.00449205
0.0186	-0.0111943	0.00048154	0.00381657
0.0188	-0.011039	0.00036032	0.00359435
0.019	-0.0112572	8.3023e-05	0.00536683
0.0192	-0.0112635	0.00108429	0.00456436
0.0194	-0.0110244	-0.00021752	0.00454496
0.0196	-0.0112824	0.00073061	0.00323103
0.0198	-0.0109887	0.00028726	0.00417812
0.02	-0.0112614	0.00016605	0.00402292
0.0202	-0.0112278	5.6456e-05	0.00380246
0.0204	-0.0110265	0.00070736	0.00428747
0.0206	-0.0108104	-6.8079e-05	0.00350087
0.0208	-0.0109698	0.00041844	0.00354849
0.021	-0.0109719	0.00037028	0.00438094
0.0212	-0.0109069	0.00023911	0.00335625
0.0214	-0.01106	0.00087341	0.00346031
0.0216	-0.0110558	0.00125531	0.00315343
0.0218	-0.0111146	0.00076215	0.00430687
0.022	-0.0110894	0.00094813	0.00482891
0.0222	-0.010846	0.00134664	0.00428394
0.0224	-0.0111565	0.00116399	0.00380246
0.0226	-0.011039	0.00160235	0.0039753
0.0228	-0.0108481	0.00127026	0.00388888
0.023	-0.0110265	0.00168039	0.00403173
0.0232	-0.0109174	0.00172357	0.00452027
0.0234	-0.0105293	0.00263848	0.00394708
0.0236	-0.0109111	0.00224495	0.00349558
0.0238	-0.0107726	0.00184146	0.0044409
0.024	-0.0107579	0.00082359	0.00374073
0.0242	-0.0109153	0.00093484	0.00344796
0.0244	-0.0108125	0.00142468	0.00433685
0.0246	-0.010867	0.00083522	0.00363138
0.0248	-0.0110684	0.00230141	0.00400704
0.025	-0.0109803	0.00138151	0.00435449
0.0252	-0.0109824	0.00167707	0.00355907
0.0254	-0.0112362	0.00244255	0.00379011
0.0256	-0.0108481	0.00097635	0.00394355
0.0258	-0.0111544	0.0015708	0.00323985
0.026	-0.0113978	0.00184478	0.00450792
0.0262	-0.0108922	0.00122709	0.00447618
0.0264	-0.0110516	0.00195769	0.00389417
0.0266	-0.0109761	0.00132505	0.00440739
0.0268	-0.0108586	0.00044501	0.00394708
0.027	-0.0111628	0.00075385	0.00402644
0.0272	-0.0110831	0.00171526	0.0040723
0.0274	-0.0108565	0.00066751	0.00492415
0.0276	-0.0109572	0.00180493	0.00364197
0.0278	-0.0110579	0.00111916	0.00370898
0.028	-0.010888	0.00169036	0.00436859
0.0282	-0.0107306	0.00186471	0.0038148
0.0284	-0.0108334	0.00069906	0.00461198
0.0286	-0.0107034	0.00133336	0.00446383
0.0288	-0.0109383	0.00206894	0.00391886
0.029	-0.0108922	0.00124535	0.0044462
0.0292	-0.0109614	0.0014745	0.00396824
0.0294	-0.0109132	0.00191784	0.00450616
0.0296	-0.0108502	0.0012935	0.00474602
0.0298	-0.0108502	0.00196267	0.00423456
0.03	-0.0110265	0.00137155	0.00446912
0.0302	-0.0108062	0.00108761	0.00437389
0.0304	-0.0107726	0.00236451	0.00403173
0.0306	-0.0108293	0.0011258	0.004582
0.0308	-0.0106614	0.00096307	0.00478482
0.031	-0.0107936	0.00099296	0.00384126
0.0312	-0.0106572	0.00116399	0.0050282
0.0314	-0.0105607	0.00123539	0.00508993
0.0316	-0.0106677	0.00135826	0.00493473
0.0318	-0.0107411	0.00242262	0.00427336
0.032	-0.0106908	0.00165549	0.00294355
0.0322	-0.0108104	0.00191784	0.00394355
0.0324	-0.0105544	0.00097303	0.00447618
0.0326	-0.0105964	0.00159903	0.00391357
0.0328	-0.0106006	0.00167375	0.00421868
0.033	-0.0104663	0.00131343	0.00438976
0.0332	-0.0107202	0.00116067	0.00374426
0.0334	-0.0110852	0.00144793	0.00376189
0.0336	-0.0106824	0.00170696	0.00465254
0.0338	-0.0106971	0.00124867	0.00442503
0.034	-0.0108607	0.00193278	0.00428923
0.0342	-0.0106132	0.0010793	0.0047372
0.0344	-0.0108272	0.00187799	0.0039753
0.0346	-0.0105418	0.00123041	0.00455202
0.0348	-0.0107558	0.00069241	0.00372486
0.035	-0.0106342	0.00098134	0.00398059
0.0352	-0.010416	0.00110089	0.00451145
0.0354	-0.0104999	0.00038855	0.00391533
0.0356	-0.0107558	0.0014911	0.00460493
0.0358	-0.0104453	0.00073725	0.00443209
0.036	-0.0107327	0.00077876	0.00412168
0.0362	-0.0108083	0.0012686	0.00382186
0.0364	-0.0105901	-0.00050644	0.0041499
0.0366	-0.0109006	0.0011341	0.00366666
0.0368	-0.0107223	0.00149442	0.004776
0.037	-0.0107579	0.00100624	0.00391357
0.0372	-0.010674	0.00118557	0.00410757
0.0374	-0.0107978	0.00125697	0.00409346
0.0376	-0.0108041	0.00101787	0.00432627
0.0378	-0.0106635	0.00179995	0.00426454
0.038	-0.0107097	0.0015791	0.0042469
0.0382	-0.0107621	0.00103447	0.00461551
0.0384	-0.0107579	0.00161231	0.00406701
0.0386	-0.010781	0.0010544	0.00407406
0.0388	-0.0107097	0.00039353	0.00421339
0.039	-0.0107495	0.00109591	0.00393297
0.0392	-0.0109069	0.000714	0.0043633
0.0394	-0.0105355	0.00125863	0.0041305
0.0396	-0.0106929	0.00092986	0.00370369
0.0398	-0.0108125	0.00184312	0.00360493
0.04	-0.0106845	0.00123705	0.00392415
0.0402	-0.0108502	0.00137819	0.00304056
0.0404	-0.0105691	0.0007688	0.00430158
0.0406	-0.0108607	0.00088835	0.00392944
0.0408	-0.0107076	0.00189459	0.00341445
0.041	-0.0107369	0.00167707	0.00391533
0.0412	-0.0107642	0.00172024	0.00380069
0.0414	-0.0109824	0.00201747	0.00357142
0.0416	-0.0108418	0.00148612	0.00303174
0.0418	-0.010716	0.00138815	0.00400528
0.042	-0.0107789	0.00195603	0.00466665
0.0422	-0.0108964	0.00193112	0.00415872
0.0424	-0.0107432	0.00185308	0.00388359
0.0426	-0.0106237	0.00166877	0.00422221
0.0428	-0.0108754	0.00132007	0.00434567
0.043	-0.0108859	0.0011341	0.00388535
0.0432	-0.010825	0.00259365	0.003873
0.0434	-0.0103237	0.00067083	0.0042469
0.0436	-0.0107432	0.00134332	0.00346736
0.0438	-0.0106614	0.00161397	0.00389593
0.044	-0.0105607	0.00030885	0.0038589
0.0442	-0.0106006	0.00098466	0.00324867
0.0444	-0.0108922	0.00121214	0.00382362
0.0446	-0.0105314	0.00096971	0.0039947
0.0448	-0.0108481	0.00180161	0.00400175
0.045	-0.0105964	0.00160899	0.00417636
0.0452	-0.0106362	0.00117561	0.00334038
0.0454	-0.0109656	0.00111085	0.00379364
0.0456	-0.0107202	0.00091658	0.00446736
0.0458	-0.0107558	0.00111251	0.00395061
0.046	-0.010974	0.00212042	0.00364902
0.0462	-0.0107076	0.0011424	0.00426983
0.0464	-0.0109027	0.00222337	0.00443032
0.0466	-0.0110579	0.00223001	0.00333509
0.0468	-0.0109257	0.00058448	0.00394355
0.047	-0.011016	0.0015077	0.00429805
0.0472	-0.0110432	0.00119886	0.00358729
0.0474	-0.0108544	0.00110919	0.00438623
0.0476	-0.0110642	0.0014197	0.00401586
0.0478	-0.0112111	0.00044501	0.00341622
0.048	-0.0109824	0.00103115	0.00429628
0.0482	-0.0108628	0.00093816	0.00403879
0.0484	-0.0111775	0.00177836	0.00305114
0.0486	-0.0109237	0.00101621	0.00372309
0.0488	-0.0108943	0.00253719	0.00376013
0.049	-0.0111125	0.0014994	0.00319223
0.0492	-0.0111565	0.00184644	0.00368606
0.0494	-0.0109467	0.00165715	0.00384655
0.0496	-0.0112027	0.0015625	0.00441092
0.0498	-0.0109321	0.00234292	0.00440916
0.05	-0.0110789	0.00163722	0.00454672
0.0502	-0.0111628	0.00194773	0.00392062
0.0504	-0.0110621	0.00140476	0.00442503
0.0506	-0.0114691	0.00141306	0.00410404
0.0508	-0.0113789	0.00250066	0.00468076
0.051	-0.0113013	0.00148944	0.00447441
0.0512	-0.0114041	0.00215861	0.00469311
0.0514	-0.0113894	0.00151601	0.00494178
0.0516	-0.0112467	0.00180991	0.00525219
0.0518	-0.0113768	0.00173685	0.00305114
0.052	-0.0111313	0.00133502	0.00364549
0.0522	-0.0111943	0.00181489	0.00349911
0.0524	-0.0110852	0.00059113	0.00420281
0.0526	-0.0112174	0.00157744	0.00435978
0.0528	-0.0111208	0.00133502	0.00407935
0.053	-0.0111439	0.00128852	0.00402997
0.0532	-0.0111985	0.00161896	0.00502644
0.0534	-0.0114922	0.00076548	0.00372486
0.0536	-0.0113936	0.00118225	0.00475307
0.0538	-0.0112404	0.00052305	0.00399293
0.054	-0.0113642	0.00074721	0.00392591
0.0542	-0.0112132	0.00086178	0.00482186
0.0544	-0.0112132	0.00041844	0.00413755
0.0546	-0.0111376	0.00071234	0.00377953
0.0548	-0.0111733	0.00129516	0.00437212
0.055	-0.0112761	0.00055626	0.00358024
0.0552	-0.011467	0.00090329	0.00406701
0.0554	-0.0111272	0.00127358	0.00455025
0.0556	-0.0112278	0.00073061	0.00397706
0.0558	-0.0111188	0.00033707	0.00417283
0.056	-0.0111418	0.00083688	0.00374778
0.0562	-0.0111355	0.00074389	0.00397353
0.0564	-0.0111922	-0.00017767	0.00366313
0.0566	-0.0110873	0.00027066	0.00365431
0.0568	-0.0113034	0.00078042	0.00405643
0.057	-0.0113223	0.00082359	0.00344443
0.0572	-0.0112803	0.00105274	0.00419928
0.0574	-0.011316	0.00082857	0.00425572
0.0576	-0.0112887	0.00059279	0.00374955
0.0578	-0.011295	0.00123207	0.00361904
0.058	-0.0113579	0.00058615	0.00394884
0.0582	-0.011532	0.00100126	0.00406524
0.0584	-0.0112404	0.0014911	0.00367724
0.0586	-0.0113768	0.00040349	0.00359964
0.0588	-0.011402	0.00077212	0.00403879
0.059	-0.0115257	0.00075053	0.00356965
0.0592	-0.0114418	0.00052637	0.00408994
0.0594	-0.0114041	0.00124369	0.00402468
0.0596	-0.0113516	0.00126196	0.00356613
0.0598	-0.0115299	0.00078208	0.00365078
0.06	-0.0114628	0.00032711	0.00373015
0.0602	-0.0116999	0.0009996	0.00332098
0.0604	-0.0115153	0.00059777	0.00379364
0.0606	-0.011488	0.00146287	0.00370722
0.0608	-0.0115719	0.00100956	0.00394355
0.061	-0.0116118	0.00052305	0.00374426
0.0612	-0.011532	0.00147948	0.00326807
0.0614	-0.0118152	0.00067083	0.0036014
0.0616	-0.0113999	0.00033874	0.00288359
0.0618	-0.0115153	0.00127856	0.00389241
0.062	-0.0116432	0.00158907	0.00471251
0.0622	-0.011509	0.0010544	0.0036596
0.0624	-0.0113474	0.00106768	0.00402292
0.0626	-0.0115236	0.00207724	0.00388182
0.0628	-0.0114859	0.0012852	0.00400175
0.063	-0.0116223	0.00181323	0.00436154
0.0632	-0.0116537	0.00178666	0.00469311
0.0634	-0.0110579	0.00169368	0.00341093
0.0636	-0.0111817	0.00220842	0.00365784
0.0638	-0.0114146	0.00079204	0.00447441
0.064	-0.0113558	0.00087175	0.0035238
0.0642	-0.0112761	0.0017136	0.00435272
0.0644	-0.0113285	0.00126528	0.00396824
0.0646	-0.0111272	0.00217853	0.00362609
0.0648	-0.0111901	0.00110421	0.00395413
0.065	-0.0112425	0.00150106	0.00437036
0.0652	-0.0110684	0.00205898	0.0038201
0.0654	-0.0112383	0.0016887	0.00382715
0.0656	-0.0110202	0.00158741	0.00399823
0.0658	-0.0109803	0.00232465	0.00371604
0.066	-0.0112027	0.00106104	0.00425748
0.0662	-0.0111167	0.0017933	0.00441269
0.0664	-0.0109027	0.00270656	0.00379188
0.0666	-0.0112006	0.00206396	0.00327336
0.0668	-0.0107789	0.00127358	0.00423632
0.067	-0.0108964	0.00188629	0.00427336
0.0672	-0.0109257	0.00157412	0.00366313
0.0674	-0.0109237	0.0017684	0.0039947
0.0676	-0.0107244	0.00204902	0.00407054
0.0678	-0.0109257	0.00231469	0.00389417
0.068	-0.0108523	0.0023562	0.004582
0.0682	-0.0107684	0.00216525	0.00377953
0.0684	-0.0109132	0.00217687	0.00397353
0.0686	-0.0110642	0.00236451	0.00468782
0.0688	-0.0107348	0.00178168	0.00374955
0.069	-0.0108859	0.00116067	0.0038977
0.0692	-0.0110202	0.00254716	0.00384302
0.0694	-0.0108041	0.00207226	0.00392591
0.0696	-0.0110432	0.00167541	0.00424161
0.0698	-0.0109698	0.00267999	0.00441974
0.07	-0.0110474	0.00161231	0.00459082
0.0702	-0.0109698	0.00192282	0.00454672
0.0704	-0.0109216	0.00211211	0.00415166
0.0706	-0.0111229	0.00145789	0.00447265
0.0708	-0.0113558	0.00124701	0.00432098
0.071	-0.010867	0.00176342	0.00440034
0.0712	-0.0109572	0.00092986	0.00446736
0.0714	-0.0110621	0.00146951	0.00523632
0.0716	-0.0108376	0.00139147	0.00467724
0.0718	-0.0110474	0.00150272	0.00389064
0.072	-0.0110747	0.00155752	0.00380951
0.0722	-0.0109971	0.00151601	0.00404232
0.0724	-0.0110432	0.0005081	0.00429276
0.0726	-0.0109971	0.00172523	0.00397177
0.0728	-0.0110684	0.0015625	0.00441798
0.073	-0.0109887	0.0017053	0.00459434
0.0732	-0.0110432	0.00140143	0.00355202
0.0734	-0.0112782	0.0005546	0.00508288
0.0736	-0.0113411	0.00137155	0.00494002
0.0738	-0.0112929	0.00129683	0.0038783
0.074	-0.0110621	0.00155254	0.00418517
0.0742	-0.0111062	0.00144295	0.00437918
0.0744	-0.0111208	0.00124535	0.00424867
0.0746	-0.0113223	0.00101455	0.0044462
0.0748	-0.0113621	0.00141472	0.00428394
0.075	-0.0111964	0.00097802	0.0045432
0.0752	-0.0112782	0.00059943	0.00408994
0.0754	-0.0110411	0.00082525	0.00434038
0.0756	-0.0111901	0.00053135	0.00431039
0.0758	-0.0114146	0.00067083	0.00439858
0.076	-0.0112027	0.00095145	0.00384831
0.0762	-0.0111649	0.0002308	0.00480069
0.0764	-0.0113432	0.00105108	0.00440034
0.0766	-0.0111481	0.00081363	0.00388006
0.0768	-0.0112803	0.00124867	0.00456436
0.077	-0.0112803	0.00177172	0.00417459
0.0772	-0.0110999	0.00226156	0.00426101
0.0774	-0.0110978	0.00102617	0.00504408
0.0776	-0.0113642	0.00196599	0.00382362
0.0778	-0.0112425	0.00187467	0.00421868
0.078	-0.0112216	0.00133336	0.00431039
0.0782	-0.011232	0.00108096	0.00398764
0.0784	-0.0111208	0.0016339	0.00369311
0.0786	-0.0111901	0.00060275	0.00478306
0.0788	-0.0110285	0.00085182	0.00410404
0.079	-0.0111355	0.00075883	0.00453085
0.0792	-0.0110537	0.00140642	0.00472662
0.0794	-0.011039	0.0014197	0.00323632
0.0796	-0.0109782	0.00086178	0.00417988
0.0798	-0.0112845	0.00080035	0.0038342
0.08	-0.0110411	0.00016937	0.0039365
0.0802	-0.0110684	0.00074721	0.00320987
0.0804	-0.0111502	0.00019427	0.00414461
0.0806	-0.0109551	0.00121712	0.00295766
0.0808	-0.0111041	0.00045497	0.00382539
0.081	-0.0112216	0.0008402	0.00403879
0.0812	-0.0109446	0.00132007	0.00422574
0.0814	-0.0113244	2.1586e-05	0.00253615
0.0816	-0.0112299	0.00072396	0.00339152
0.0818	-0.0110957	0.00049648	0.00393826
0.082	-0.0110747	0.00065256	0.0043827
0.0822	-0.0112698	0.00083522	0.00394179
0.0824	-0.0111733	0.00152431	0.00395942
0.0826	-0.0112488	0.00026235	0.00341093
0.0828	-0.011146	0.0012055	0.00406172
0.083	-0.0111817	0.00072895	0.00415695
0.0832	-0.0112782	0.00056788	0.00408112
0.0834	-0.0107474	0.00097303	0.00340211
0.0836	-0.0109195	0.00127026	0.00377248
0.0838	-0.0110076	0.00126694	0.00416754
0.084	-0.0109174	0.00115569	0.00392239
0.0842	-0.0110285	0.00104942	0.00318694
0.0844	-0.0109278	0.0017933	0.00354849
0.0846	-0.0109761	0.00149276	0.00403173
0.0848	-0.0110034	0.00150604	0.00347971
0.085	-0.0110055	0.002499	0.0039947
0.0852	-0.0108649	0.00148944	0.00362962
0.0854	-0.0111083	0.00221174	0.00395061
0.0856	-0.0110999	0.00128686	0.00423985
0.0858	-0.0108733	0.00196267	0.00343914
0.086	-0.0110453	0.00158409	0.00354849
0.0862	-0.0108754	0.0022848	0.00438447
0.0864	-0.0109992	0.00235288	0.00387477
0.0866	-0.0111062	0.00238941	0.0034656
0.0868	-0.0109195	0.00192614	0.00400881
0.087	-0.0108754	0.00111417	0.00405819
0.0872	-0.011039	0.00181655	0.003679
0.0874	-0.010867	0.00185972	0.00428394
0.0876	-0.0110013	0.00090828	0.00388535
0.0878	-0.0111062	0.00134332	0.00432627
0.088	-0.010953	0.0015791	0.00437036
0.0882	-0.0108083	0.00119554	0.00414108
0.0884	-0.0110705	0.00147782	0.00447618
0.0886	-0.0110013	0.00141638	0.00497706
0.0888	-0.0109908	0.0014745	0.00353791
0.089	-0.0110957	0.00149608	0.00364197
0.0892	-0.0108272	0.00186304	0.00414108
0.0894	-0.0110223	0.00063098	0.00367195
0.0896	-0.0108209	0.00191286	0.004485
0.0898	-0.0109845	0.00099628	0.00410052
0.09	-0.0109929	0.00105108	0.0046596
0.0902	-0.0108544	0.00099462	0.00455378
0.0904	-0.0111229	0.00070736	0.004582
0.0906	-0.0112216	0.00132837	0.00402821
0.0908	-0.0109132	0.00118889	0.00461727
0.091	-0.0110432	0.0010544	0.00407759
0.0912	-0.0109614	0.00083023	0.004485
0.0914	-0.0108104	0.00154756	0.00519046
0.0916	-0.0110684	0.00093318	0.00462962
0.0918	-0.0109278	0.00210049	0.00415695
0.092	-0.011016	0.00089831	0.00274602
0.0922	-0.0109551	0.00063596	0.00384302
0.0924	-0.0109971	0.00046161	0.00436683
0.0926	-0.010888	0.0008485	0.00438976
0.0928	-0.0110244	0.00122709	0.00381304
0.093	-0.0109006	0.00187965	0.00453614
0.0932	-0.0108272	0.00039187	0.00365431
0.0934	-0.0114271	0.00061437	0.003679
0.0936	-0.0111272	0.00137487	0.0044462
0.0938	-0.0111418	0.00126362	0.00359611
0.094	-0.0113348	0.00148114	0.0043245
0.0942	-0.011188	0.00131177	0.0041887
0.0944	-0.0113265	0.00131177	0.00415872
0.0946	-0.0114712	0.00145291	0.00404937
0.0948	-0.0111565	0.00122709	0.00473544
0.095	-0.0114167	0.00024907	0.00374602
0.0952	-0.0113663	-4.3172e-05	0.00430334
0.0954	-0.0113327	0.00087341	0.00408288
0.0956	-0.0114859	0.0002059	0.00434919
0.0958	-0.0113516	0.00020922	0.00432098
0.096	-0.0114062	0.00051474	0.00384302
0.0962	-0.0114754	0.00033874	0.00384479
0.0964	-0.0112803	-0.00045829	0.00464725
0.0966	-0.0113327	0.00076049	0.00372662
0.0968	-0.0112572	0.00107266	0.00404937
0.097	-0.0111754	0.00120716	0.00385184
0.0972	-0.0111544	0.00097303	0.00361198
0.0974	-0.0110642	0.00087009	0.00455554
0.0976	-0.0114125	0.00047821	0.00417812
0.0978	-0.0111313	0.00084518	0.00434743
0.098	-0.0112635	0.00045829	0.00392944
0.0982	-0.0114104	0.00044999	0.00427159
0.0984	-0.0111313	0.0008485	0.00411815
0.0986	-0.0114439	-0.00012121	0.00401939
0.0988	-0.0113705	0.0004915	0.00475836
0.099	-0.0113181	0.0009996	0.00414285
0.0992	-0.01106	-9.9628e-06	0.00431392
0.0994	-0.0110936	0.00145125	0.00480951
0.0996	-0.0110894	0.00107764	0.00295061
0.0998	-0.0111922	0.00038689	0.0038536
0.1	-0.00705726	0.00686769	0.0112151
0.1002	0.0157005	0.0273081	0.0193827
0.1004	0.0128117	0.0080981	0.00249558
0.1006	0.00357688	0.00031217	-0.00030688
0.1008	-0.00300836	-0.00332758	-0.00172663
0.101	-0.0071202	-0.00394859	0.00038977
0.1012	-0.00932507	-0.00289087	-0.00041446
0.1014	-0.0107348	-0.00398014	0.00029277
0.1016	-0.0111775	-0.00342721	0.00087654
0.1018	-0.0113936	-0.00266505	0.00121693
0.102	-0.011532	-0.00369952	0.00246207
0.1022	-0.0113726	-0.0032047	0.00295061
0.1024	-0.0110915	-0.00244753	0.00235449
0.1026	-0.0110202	-0.00303201	0.00253791
0.1028	-0.0104957	-0.00189625	0.00334214
0.103	-0.0105418	-0.00141638	0.00242151
0.1032	-0.010437	-0.00230141	0.00313756
0.1034	-0.00981597	-0.00139645	0.00374955
0.1036	-0.00968381	-0.00169368	0.00279012
0.1038	-0.00973206	-0.00109923	0.00392415
0.104	-0.00920549	-0.00053799	0.00336683
0.1042	-0.00900619	-0.00071566	0.00279188
0.1044	-0.00905025	-0.0011258	0.00425748
0.1046	-0.00886564	-0.00094813	0.0033104
0.1048	-0.00857193	-0.00089167	0.00436154
0.105	-0.00881738	-0.00146785	0.0046402
0.1052	-0.00858872	-0.00080367	0.00308641
0.1054	-0.00853207	-0.00087507	0.00371075
0.1056	-0.00849011	-0.00022914	0.00430863
0.1058	-0.00832858	-0.00048652	0.0044656
0.106	-0.00818173	-0.00037859	0.00451321
0.1062	-0.0080097	0.00014778	0.00442503
0.1064	-0.00797613	0.00051973	0.00415695
0.1066	-0.00816704	0.0001428	0.00411639
0.1068	-0.00807683	-0.00036198	0.00500351
0.107	-0.00773068	-0.00054629	0.0036596
0.1072	-0.00789222	-0.00032213	0.00497882
0.1074	-0.00807264	0.00016605	0.00451321
0.1076	-0.00778733	-0.00021752	0.00460316
0.1078	-0.00792998	0.00037859	0.00461022
0.108	-0.0079132	0.00040017	0.00466489
0.1082	-0.00764257	-0.00022914	0.00421516
0.1084	-0.0078167	2.9888e-05	0.00497
0.1086	-0.00779152	0.00052803	0.00452909
0.1088	-0.00744957	-0.0002308	0.00469664
0.109	-0.00746635	0.00034372	0.00501939
0.1092	-0.00766355	0.00080865	0.00427159
0.1094	-0.00758593	0.00059279	0.00463843
0.1096	-0.0075188	-0.00019261	0.00558552
0.1098	-0.00737195	0.00026734	0.00435801
0.11	-0.00749152	3.9851e-05	0.0052857
0.1102	-0.0075167	0.00068411	0.00515519
0.1104	-0.00732579	0.00052139	0.0053245
0.1106	-0.00767404	0.00059445	0.00572662
0.1108	-0.00750411	0.00069574	0.00505642
0.111	-0.00724397	0.00031715	0.0055961
0.1112	-0.0073132	0.00039021	0.00541092
0.1114	-0.00715167	0.0005081	0.00575836
0.1116	-0.00680132	0.00016937	0.00574954
0.1118	-0.00720202	0.00017103	0.0055767
0.112	-0.007116	0.00113576	0.0039365
0.1122	-0.00708454	7.4721e-05	0.00487477
0.1124	-0.00723768	0.0007854	0.0042275
0.1126	-0.00687055	0.00017601	0.00510933
0.1128	-0.00706356	0.00034372	0.00560845
0.113	-0.00678034	0.00053799	0.00453085
0.1132	-0.00683489	0.00048984	0.00515342
0.1134	-0.00732369	0.00032877	0.00501057
0.1136	-0.00689153	0.00049814	0.00445854
0.1138	-0.00687055	0.00099794	0.00476013
0.114	-0.00675936	0.00130015	0.00550263
0.1142	-0.00680342	0.00094813	0.00461903
0.1144	-0.00674258	0.00132505	0.00504055
0.1146	-0.00687894	0.00060939	0.00491004
0.1148	-0.00671111	0.00087009	0.00539328
0.115	-0.00686636	0.00088835	0.00519223
0.1152	-0.00670902	-6.6419e-05	0.00505466
0.1154	-0.0066272	0.00117395	0.00433861
0.1156	-0.00659783	5.9777e-05	0.00494178
0.1158	-0.00618035	0.00120052	0.00500528
0.116	-0.00645937	0.00088835	0.00507935
0.1162	-0.00674468	0.00047489	0.00462962
0.1164	-0.00667335	0.00066253	0.00578482
0.1166	-0.00661881	0.00023911	0.00506877
0.1168	-0.00654958	0.00144129	0.00494355
0.117	-0.00623699	0.00134498	0.00560316
0.1172	-0.00634189	0.00137321	0.00491357
0.1174	-0.00615727	0.00105108	0.00490122
0.1176	-0.0063272	0.00132837	0.00472485
0.1178	-0.00620343	0.00181157	0.00527864
0.118	-0.00634189	0.00127524	0.00545325
0.1182	-0.00627895	0.00136158	0.00430158
0.1184	-0.00602721	0.00130181	0.0052469
0.1186	-0.00634189	0.00166877	0.0048924
0.1188	-0.00628944	0.00192614	0.00516224
0.119	-0.00648035	0.00185308	0.00540563
0.1192	-0.00639224	0.00115569	0.00525924
0.1194	-0.00634398	0.00230805	0.00471956
0.1196	-0.00645307	0.00104111	0.00454143
0.1198	-0.00631042	0.00104942	0.00527864
0.12	-0.00648664	0.00156416	0.00467547
0.1202	-0.00637545	0.00099462	0.00459082
0.1204	-0.00633769	0.00174515	0.00453438
0.1206	-0.0062349	0.00202245	0.00431392
0.1208	-0.00631881	0.00191784	0.00499117
0.121	-0.00633559	0.00234126	0.00483773
0.1212	-0.00624958	0.00266671	0.00390122
0.1214	-0.00640902	0.00159903	0.00467547
0.1216	-0.00638175	0.00203075	0.00401233
0.1218	-0.00620762	0.00142966	0.00454496
0.122	-0.00645727	0.00112912	0.00558552
0.1222	-0.00615937	0.00204902	0.00551674
0.1224	-0.00611112	0.00104609	0.00444443
0.1226	-0.00635657	0.00177006	0.00465784
0.1228	-0.00617615	0.00224661	0.00510757
0.123	-0.0063251	0.00225159	0.00477776
0.1232	-0.00626427	0.00237945	0.00471251
0.1234	-0.00562441	0.00301541	0.00483244
0.1236	-0.00599783	0.00219016	0.00471251
0.1238	-0.00591812	0.00173021	0.00473367
0.124	-0.00597476	0.00176508	0.00521339
0.1242	-0.00590763	0.00170032	0.0043439
0.1244	-0.0059349	0.00194939	0.0050088
0.1246	-0.00570833	0.0017219	0.00486418
0.1248	-0.00607965	0.00176176	0.00453614
0.125	-0.00591602	0.00253221	0.00527335
0.1252	-0.00587826	0.00243425	0.00451145
0.1254	-0.00594329	0.00176342	0.00419752
0.1256	-0.00578175	0.00227318	0.00507759
0.1258	-0.0059286	0.0025455	0.00462256
0.126	-0.00601042	0.00265841	0.00468782
0.1262	-0.00568945	0.00228978	0.00540916
0.1264	-0.00582581	0.00283276	0.00483597
0.1266	-0.00590763	0.00280785	0.00474425
0.1268	-0.00582161	0.00288423	0.00504584
0.127	-0.00596637	0.00172523	0.00465607
0.1272	-0.00620133	0.00224329	0.00516753
0.1274	-0.00595168	0.00221506	0.00551145
0.1276	-0.00601881	0.00226488	0.00422574
0.1278	-0.00620972	0.0029905	0.00480775
0.128	-0.00608804	0.00298054	0.00541797
0.1282	-0.00610692	0.00315323	0.00491357
0.1284	-0.00617825	0.00316817	0.00467547
0.1286	-0.00584469	0.00301707	0.00507406
0.1288	-0.00589084	0.00486351	0.00476895
0.129	-0.00585308	0.00273147	0.00526101
0.1292	-0.00600413	0.00247244	0.00488888
0.1294	-0.00585518	0.00391372	0.00508817
0.1296	-0.00616357	0.00244421	0.00538976
0.1298	-0.00568315	0.00283276	0.00489593
0.13	-0.00571882	0.00292076	0.0053245
0.1302	-0.00601881	0.00206728	0.00556612
0.1304	-0.00568106	0.00266505	0.00512697
0.1306	-0.00585308	0.00286099	0.0056208
0.1308	-0.00584049	0.00272981	0.00479893
0.131	-0.00577546	0.00258867	0.0053245
0.1312	-0.00601462	0.00311836	0.00555378
0.1314	-0.00572301	0.00296393	0.00537036
0.1316	-0.00594119	0.00238941	0.00660492
0.1318	-0.00593909	0.00265177	0.00517459
0.132	-0.00585728	0.00174183	0.00392768
0.1322	-0.00582371	0.00215695	0.00540563
0.1324	-0.00570203	0.00235288	0.00501762
0.1326	-0.00598944	0.00275638	0.00567723
0.1328	-0.00554469	0.00201249	0.00570545
0.133	-0.00588035	0.00229975	0.00500175
0.1332	-0.00554889	0.00235786	0.00561021
0.1334	-0.00605658	0.00277962	0.00516224
0.1336	-0.00598735	0.00225491	0.00518517
0.1338	-0.00556567	0.00250066	0.00528217
0.134	-0.00593909	0.00294567	0.00543208
0.1342	-0.00582371	0.00222005	0.00515519
0.1344	-0.00557197	0.00182485	0.00547441
0.1346	-0.0057335	0.00288257	0.00523984
0.1348	-0.00554469	0.00208389	0.0048342
0.135	-0.00544609	0.00153427	0.00534566
0.1352	-0.00557406	0.00234624	0.00510051
0.1354	-0.0054356	0.00165549	0.00528923
0.1356	-0.00566008	0.00221672	0.0055767
0.1358	-0.00548805	0.00223997	0.00517282
0.136	-0.00576917	0.00289752	0.0046402
0.1362	-0.00552581	0.00186138	0.00511639
0.1364	-0.0057377	0.00171526	0.0055961
0.1366	-0.00542931	0.0014197	0.0053051
0.1368	-0.005637	0.00269826	0.00547794
0.137	-0.0054377	0.00318644	0.00509346
0.1372	-0.00531602	0.0029191	0.00490298
0.1374	-0.00556148	0.0027763	0.00459082
0.1376	-0.00564329	0.00270822	0.00528923
0.1378	-0.00555728	0.0024907	0.00521515
0.138	-0.00550064	0.00244421	0.00485007
0.1382	-0.0058363	0.0019112	0.00505466
0.1384	-0.0058384	0.00231137	0.00496824
0.1386	-0.00578385	0.00165549	0.00520986
0.1388	-0.00587406	0.00330765	0.00569134
0.139	-0.0058342	0.00219846	0.00498764
0.1392	-0.00589504	0.00161563	0.00592238
0.1394	-0.00579854	0.00219846	0.0050917
0.1396	-0.00603769	0.00207392	0.00484655
0.1398	-0.0060356	0.00109757	0.00516753
0.14	-0.00600832	0.00176508	0.00535095
0.1402	-0.00605238	0.00121048	0.00449205
0.1404	-0.00614049	0.00148612	0.00501057
0.1406	-0.00591602	0.0017219	0.00547618
0.1408	-0.00609434	0.00157246	0.00474778
0.141	-0.00606077	0.0022599	0.00502997
0.1412	-0.00607336	0.00301043	0.00465784
0.1414	-0.00616357	0.00182984	0.0044021
0.1416	-0.00606287	0.00220842	0.00476542
0.1418	-0.00596007	0.00230141	0.00465431
0.142	-0.00609434	0.00135826	0.0059894
0.1422	-0.00594749	0.00292242	0.00558376
0.1424	-0.00582161	0.00293405	0.00480422
0.1426	-0.00622231	0.0023313	0.00494708
0.1428	-0.00616986	0.00186969	0.00545325
0.143	-0.00596427	0.00170696	0.00483949
0.1432	-0.00621601	0.00232798	0.00516401
0.1434	-0.0057335	0.00232798	0.00468605
0.1436	-0.00575868	0.00263516	0.00489769
0.1438	-0.00600832	0.00253055	0.00558552
0.144	-0.00592651	0.00149774	0.00476365
0.1442	-0.00585308	0.00191618	0.00431039
0.1444	-0.00578595	0.00257206	0.00486595
0.1446	-0.00586567	0.00281283	0.00428041
0.1448	-0.00590972	0.00210879	0.00453614
0.145	-0.0059307	0.002411	0.00488888
0.1452	-0.00587826	0.0026418	0.00467371
0.1454	-0.00608175	0.00287095	0.00452556
0.1456	-0.00604399	0.00189459	0.0049894
0.1458	-0.00591182	0.00161896	0.00491709
0.146	-0.00609014	0.00214698	0.00518164
0.1462	-0.00583	0.0022682	0.00538623
0.1464	-0.00581952	0.00257539	0.0046014
0.1466	-0.00585308	0.00313662	0.00468076
0.1468	-0.00569154	0.00220676	0.00544619
0.147	-0.00572931	0.00069241	0.00457494
0.1472	-0.00582791	0.00214532	0.00517282
0.1474	-0.00570203	0.00261856	0.00537741
0.1476	-0.00571882	0.00229809	0.00495766
0.1478	-0.00590343	0.00189791	0.00495413
0.148	-0.0058363	0.00242926	0.00511815
0.1482	-0.00560343	0.00270988	0.00521692
0.1484	-0.00565169	0.00326116	0.00502291
0.1486	-0.0055426	0.00323957	0.00547441
0.1488	-0.00548805	0.00255214	0.00453438
0.149	-0.0054419	0.00280619	0.004873
0.1492	-0.00562441	0.00342554	0.00449558
0.1494	-0.00542511	0.00364971	0.00490122
0.1496	-0.00560134	0.00344049	0.00478306
0.1498	-0.00541253	0.00274807	0.00547265
0.15	-0.00554679	0.00374103	0.00522221
0.1502	-0.00559294	0.00338569	0.00597176
0.1504	-0.00541462	0.00274475	0.00526806
0.1506	-0.00565378	0.00317315	0.00523279
0.1508	-0.00547756	0.00337075	0.00540739
0.151	-0.00517966	0.00253387	0.00526983
0.1512	-0.00541253	0.00301707	0.00466136
0.1514	-0.00539574	0.00351853	0.00586242
0.1516	-0.00518176	0.00280619	0.00569663
0.1518	-0.00539784	0.00294069	0.00520986
0.152	-0.00524889	0.00287427	0.00441621
0.1522	-0.00535169	0.00256044	0.0042275
0.1524	-0.00519645	0.00249236	0.00519752
0.1526	-0.0050475	0.00199256	0.0050529
0.1528	-0.00528875	0.00179497	0.00504408
0.153	-0.00499295	0.00288589	0.00558023
0.1532	-0.00507477	0.00318644	0.00497177
0.1534	-0.0052384	0.00255214	0.00510757
0.1536	-0.00540623	0.00260195	0.00559434
0.1538	-0.00520064	0.00216857	0.00516048
0.154	-0.0053412	0.00255712	0.00500351
0.1542	-0.00520484	0.00293903	0.00550087
0.1544	-0.00531812	0.00221174	0.00457847
0.1546	-0.00525309	0.00229643	0.00523455
0.1548	-0.00509365	0.00294899	0.00570545
0.155	-0.00515239	0.00219182	0.00479011
0.1552	-0.00523421	0.00218019	0.00528041
0.1554	-0.00501603	0.00233628	0.00554672
0.1556	-0.00503071	0.00256542	0.00492238
0.1558	-0.0049405	0.00249734	0.00483597
0.156	-0.00498456	0.00226986	0.00499999
0.1562	-0.00498036	0.00261192	0.00512344
0.1564	-0.00500344	0.00189127	0.00508288
0.1566	-0.00491953	0.00141306	0.00508993
0.1568	-0.00512931	0.00231967	0.00580069
0.157	-0.00502862	0.00231469	0.00512697
0.1572	-0.00509785	0.00226654	0.0048342
0.1574	-0.00505589	0.00250232	0.00476718
0.1576	-0.00520064	0.00193444	0.00511992
0.1578	-0.00511673	0.00295065	0.00489417
0.158	-0.00503281	0.00203573	0.00441092
0.1582	-0.00525728	0.00200252	0.00457847
0.1584	-0.00497617	0.00267169	0.00487124
0.1586	-0.00509785	0.00197596	0.00406701
0.1588	-0.00505169	0.00199256	0.00499999
0.159	-0.00495519	0.00230639	0.00498059
0.1592	-0.00513141	0.00124369	0.00518341
0.1594	-0.00513561	0.00171526	0.00542503
0.1596	-0.00531602	0.00213702	0.00479364
0.1598	-0.00536637	0.00131509	0.00566489
0.16	-0.00522162	0.0025455	0.00435978
0.1602	-0.0051377	0.00246081	0.00386242
0.1604	-0.00520274	0.00232299	0.00483244
0.1606	-0.0053433	0.00279789	0.00516401
0.1608	-0.00529505	0.0024824	0.00424337
0.161	-0.00538735	0.00242262	0.00462609
0.1612	-0.00541462	0.00252391	0.00498059
0.1614	-0.00546497	0.00351023	0.00375837
0.1616	-0.00545029	0.00267335	0.0043633
0.1618	-0.00575658	0.00281283	0.00465254
0.162	-0.00548176	0.00237613	0.00515872
0.1622	-0.00537267	0.00177504	0.00502997
0.1624	-0.00571252	0.00249734	0.00477247
0.1626	-0.00565169	0.00229809	0.00465254
0.1628	-0.00545239	0.0019826	0.00480951
0.163	-0.00551952	0.0027049	0.00492062
0.1632	-0.00557197	0.00220676	0.0047954
0.1634	-0.00529085	0.00181489	0.00526806
0.1636	-0.00549854	0.00342388	0.00437918
0.1638	-0.0054377	0.001697	0.0043245
0.164	-0.00539994	0.00134498	0.00494531
0.1642	-0.00547337	0.00260195	0.00429981
0.1644	-0.0050433	0.00299548	0.00466842
0.1646	-0.00528036	0.00266837	0.00523103
0.1648	-0.00529295	0.00288091	0.00417988
0.165	-0.00521742	0.00358495	0.00501233
0.1652	-0.00529714	0.00258369	0.00455731
0.1654	-0.00542721	0.00316153	0.00452909
0.1656	-0.00519435	0.00274143	0.00458023
0.1658	-0.00546917	0.00330267	0.00551498
0.166	-0.00541462	0.00316153	0.0045238
0.1662	-0.00517966	0.00309843	0.00490651
0.1664	-0.00542092	0.00361982	0.00494531
0.1666	-0.00508316	0.00395191	0.00448676
0.1668	-0.0050391	0.00245251	0.0045626
0.167	-0.00521323	0.00264512	0.00522044
0.1672	-0.00520693	0.00271652	0.00455202
0.1674	-0.0051398	0.0030702	0.00514813
0.1676	-0.00530134	0.00277796	0.00503526
0.1678	-0.00490064	0.00265675	0.00470193
0.168	-0.00511673	0.00281947	0.00530334
0.1682	-0.00533071	0.00282446	0.00483773
0.1684	-0.00519015	0.00224495	0.00424337
0.1686	-0.00493631	0.00322131	0.00525924
0.1688	-0.00508526	0.00288257	0.00507759
0.169	-0.00490064	0.00265509	0.00419576
0.1692	-0.00485449	0.00309843	0.00475484
0.1694	-0.00515449	0.00203241	0.00426807
0.1696	-0.00498456	0.00307851	0.00499293
0.1698	-0.00493211	0.00379749	0.00519928
0.17	-0.0048419	0.00275638	0.00489769
0.1702	-0.00467407	0.00186637	0.00546559
0.1704	-0.00492792	0.00249568	0.00470545
0.1706	-0.00479785	0.0029656	0.00526983
0.1708	-0.00478736	0.00267999	0.00514284
0.171	-0.00481463	0.00234624	0.00479716
0.1712	-0.00473491	0.00257372	0.0058536
0.1714	-0.00477897	0.00279291	0.00540739
0.1716	-0.00492582	0.00251063	0.00554143
0.1718	-0.00508945	0.00158409	0.00573191
0.172	-0.00495939	0.00245085	0.00353791
0.1722	-0.0053391	0.0027763	0.00534743
0.1724	-0.00512092	0.00272483	0.00472133
0.1726	-0.00512302	0.00395523	0.00512521
0.1728	-0.00505379	0.00320304	0.00527159
0.173	-0.00501603	0.00302205	0.0049312
0.1732	-0.00522582	0.00298054	0.00515695
0.1734	-0.00560973	0.00223167	0.00477776
0.1736	-0.0056349	0.00285102	0.00487477
0.1738	-0.00571252	0.00248738	0.00497177
0.174	-0.00550274	0.00258535	0.00470369
0.1742	-0.00580483	0.00163224	0.00517812
0.1744	-0.00578385	0.00133336	0.00550439
0.1746	-0.00551532	0.00222171	0.00485184
0.1748	-0.0056349	0.00232632	0.00488888
0.175	-0.00577126	0.00206396	0.00533861
0.1752	-0.00559085	0.0014994	0.0048536
0.1754	-0.00586357	0.0028394	0.00510581
0.1756	-0.00559924	0.00208223	0.00502997
0.1758	-0.00557406	0.00260029	0.00521163
0.176	-0.00584049	0.00285766	0.00517106
0.1762	-0.00564959	0.00230971	0.00484478
0.1764	-0.00560134	0.00220676	0.00542327
0.1766	-0.00567896	0.00129849	0.00446207
0.1768	-0.00557197	0.00189293	0.00521163
0.177	-0.0058342	0.0032678	0.00471956
0.1772	-0.00564959	0.00210215	0.00464902
0.1774	-0.00543351	0.00154257	0.00554143
0.1776	-0.00560553	0.0026883	0.00484302
0.1778	-0.00558036	0.0024907	0.0052275
0.178	-0.00551952	0.00214865	0.00448676
0.1782	-0.00584469	0.00267667	0.00533861
0.1784	-0.00551113	0.00225824	0.00483949
0.1786	-0.00550274	0.00272815	0.00537036
0.1788	-0.00527197	0.00259697	0.0045626
0.179	-0.00547127	0.00151767	0.00517988
0.1792	-0.00557406	0.00210215	0.00497529
0.1794	-0.00529924	0.00227816	0.00495942
0.1796	-0.00550274	0.00191618	0.00511462
0.1798	-0.00530973	0.00264845	0.00498588
0.18	-0.00543351	0.0026966	0.00469487
0.1802	-0.00546707	0.00230805	0.00508111
0.1804	-0.0052426	0.00285766	0.00428923
0.1806	-0.00546917	0.00182319	0.00477953
0.1808	-0.00530763	0.00219514	0.00464196
0.181	-0.00532651	0.00282944	0.00455554
0.1812	-0.00549015	0.00187301	0.00486947
0.1814	-0.0055363	0.00280785	0.00410052
0.1816	-0.00569784	0.0029822	0.00499469
0.1818	-0.00569154	0.00264346	0.00496824
0.182	-0.00549644	0.00167043	0.00560845
0.1822	-0.00552162	0.00205566	0.00492238
0.1824	-0.00543351	0.00231635	0.00497882
0.1826	-0.00530554	0.00210879	0.00467194
0.1828	-0.00555099	0.00246413	0.00499822
0.183	-0.00546288	0.00175511	0.00484655
0.1832	-0.00545029	0.00235288	0.00461551
0.1834	-0.00545868	0.00221506	0.00488182
0.1836	-0.00521952	0.00278294	0.00540916
0.1838	-0.00528665	0.00223665	0.00450969
0.184	-0.0054377	0.00219182	0.0050335
0.1842	-0.00540414	0.00260693	0.00486595
0.1844	-0.00530134	0.00245915	0.0044268
0.1846	-0.00551323	0.00256044	0.00491533
0.1848	-0.00530344	0.0042508	0.00484655
0.185	-0.00534749	0.00353846	0.00459963
0.1852	-0.00537896	0.00286929	0.00481127
0.1854	-0.00526568	0.00321799	0.00422574
0.1856	-0.00537477	0.002856	0.00443032
0.1858	-0.00564959	0.00329935	0.00525395
0.186	-0.00536637	0.00317315	0.00457494
0.1862	-0.00507267	0.00349694	0.00423456
0.1864	-0.00538106	0.00370782	0.00486242
0.1866	-0.00535169	0.0046709	0.00481304
0.1868	-0.00542511	0.00405486	0.00411639
0.187	-0.00545868	0.00286099	0.00486771
0.1872	-0.00534959	0.00295729	0.00487477
0.1874	-0.00528246	0.00289586	0.00453791
0.1876	-0.0053391	0.00316319	0.00498588
0.1878	-0.00521323	0.00348864	0.00452203
0.188	-0.00532232	0.00319142	0.00460845
0.1882	-0.00558875	0.00366631	0.00516224
0.1884	-0.00532232	0.0035534	0.00447794
0.1886	-0.00522582	0.00330433	0.00466313
0.1888	-0.0053391	0.0041329	0.00499293
0.189	-0.00525309	0.0032512	0.00396648
0.1892	-0.00518386	0.00365303	0.00514637
0.1894	-0.00549015	0.00421925	0.0046402
0.1896	-0.00536008	0.00284604	0.00498235
0.1898	-0.00542302	0.00273977	0.00516048
0.19	-0.00548385	0.00357831	0.00489064
0.1902	-0.00515449	0.00363974	0.00525572
0.1904	-0.00538316	0.00334916	0.00470545
0.1906	-0.00523421	0.00330931	0.00466136
0.1908	-0.00519225	0.00232299	0.00487124
0.191	-0.00506428	0.00275472	0.00519752
0.1912	-0.00469505	0.0026335	0.00470545
0.1914	-0.00476218	0.00343551	0.00468253
0.1916	-0.00485659	0.00305194	0.005873
0.1918	-0.00463212	0.00438363	0.00485889
0.192	-0.00497197	0.00370948	0.00371075
0.1922	-0.00467407	0.00363808	0.00447265
0.1924	-0.00492162	0.00298718	0.00458023
0.1926	-0.0049489	0.00307685	0.00546383
0.1928	-0.00457967	0.00315323	0.00438447
0.193	-0.00472442	0.0033475	0.0049312
0.1932	-0.00451044	0.0031333	0.00555907
0.1934	-0.00481673	0.00332426	0.00485007
0.1936	-0.00500134	0.00262686	0.00526983
0.1938	-0.00468456	0.0032678	0.00503173
0.194	-0.00471184	0.0039187	0.00507406
0.1942	-0.00493001	0.00348366	0.00492591
0.1944	-0.00463421	0.00293073	0.00558023
0.1946	-0.0049447	0.00339067	0.00528394
0.1948	-0.00483561	0.00334916	0.00502997
0.195	-0.00471393	0.00254218	0.00485007
0.1952	-0.00500973	0.00302039	0.00482715
0.1954	-0.00498456	0.0027763	0.00562961
0.1956	-0.00486078	0.00352683	0.00505995
0.1958	-0.00504959	0.0034189	0.00497882
0.196	-0.00488596	0.00269494	0.00434919
0.1962	-0.00496568	0.00363974	0.0049506
0.1964	-0.00506428	0.00237281	0.00506701
0.1966	-0.00481883	0.00183648	0.00499117
0.1968	-0.00500344	0.00346374	0.00539857
0.197	-0.00500554	0.00428567	0.00500175
0.1972	-0.00480204	0.00305028	0.00499293
0.1974	-0.0051377	0.00334584	0.00418341
0.1976	-0.00509994	0.00357499	0.00487829
0.1978	-0.00522791	0.00384066	0.00499469
0.198	-0.00513561	0.00325286	0.0050476
0.1982	-0.0056391	0.00326448	0.00489593
0.1984	-0.00521113	0.00206064	0.00467547
0.1986	-0.00533491	0.00340894	0.00474249
0.1988	-0.00536008	0.00264679	0.00486418
0.199	-0.00518805	0.00268332	0.00513579
0.1992	-0.00524679	0.00279955	0.00443385
0.1994	-0.00510414	0.00196267	0.00491533
0.1996	-0.0051398	0.00247908	0.00438094
0.1998	-0.00519645	0.00337905	0.0046402
0.2	-0.00510414	0.00291744	0.00481304
0.2002	-0.00499085	0.00379915	0.00463491
0.2004	-0.00533491	0.00374768	0.00424337
0.2006	-0.0050475	0.00223001	0.00472838
0.2008	-0.00520064	0.00325784	0.0041305
0.201	-0.00519015	0.00330433	0.00428217
0.2012	-0.00515239	0.00179663	0.00450969
0.2014	-0.00502232	0.00247908	0.00325749
0.2016	-0.00504959	0.00237779	0.00392591
0.2018	-0.00510624	0.00161563	0.00347265
0.202	-0.00483561	0.00279125	0.00568781
0.2022	-0.0051419	0.0029822	0.00493297
0.2024	-0.0049447	0.00201083	0.00410934
0.2026	-0.00486708	0.0027049	0.00449381
0.2028	-0.00507896	0.00250232	0.00501586
0.203	-0.00479785	0.00260859	0.00435625
0.2032	-0.00495939	0.00290582	0.0048924
0.2034	-0.00458177	0.00209219	0.00456789
0.2036	-0.00446429	0.00311006	0.00423103
0.2038	-0.00472232	0.00307519	0.0042275
0.204	-0.00476009	0.00293737	0.00478835
0.2042	-0.00463841	0.00403494	0.00399999
0.2044	-0.00467827	0.00401003	0.00389417
0.2046	-0.00460065	0.00264679	0.00498235
0.2048	-0.00442862	0.0029191	0.00436859
0.205	-0.00475799	0.00452477	0.00445149
0.2052	-0.00455659	0.00362646	0.00414108
0.2054	-0.00446429	0.00313496	0.00406172
0.2056	-0.00476848	0.00298386	0.00457847
0.2058	-0.00457757	0.00313828	0.00450263
0.206	-0.00464261	0.00416445	0.0040917
0.2062	-0.00463841	0.00405486	0.00450792
0.2064	-0.00465729	0.00431556	0.00480951
0.2066	-0.00465729	0.00430891	0.00423103
0.2068	-0.00475799	0.00443843	0.00488182
0.207	-0.00468037	0.00292906	0.00519399
0.2072	-0.00469715	0.00337905	0.00387653
0.2074	-0.00486288	0.00282446	0.00436507
0.2076	-0.00442652	0.00329271	0.00454496
0.2078	-0.00463631	0.00418936	0.00449205
0.208	-0.00486498	0.00299548	0.00465784
0.2082	-0.00473701	0.00387553	0.00497353
0.2084	-0.00473491	0.00431057	0.00433332
0.2086	-0.00491113	0.00361484	0.00428747
0.2088	-0.00483561	0.00303035	0.00461727
0.209	-0.00472862	0.00264512	0.0038783
0.2092	-0.00497407	0.00357167	0.0040529
0.2094	-0.00491113	0.00318312	0.00416225
0.2096	-0.0050433	0.00353181	0.00491357
0.2098	-0.00500973	0.00402331	0.00494531
0.21	-0.00492582	0.00327776	0.00480775
0.2102	-0.00506638	0.003213	0.00497882
0.2104	-0.0050391	0.00351189	0.0060864
0.2106	-0.00485869	0.00395855	0.00505642
0.2108	-0.00495309	0.00417109	0.0049312
0.211	-0.00486498	0.003751	0.00558552
0.2112	-0.00466568	0.00323127	0.00479187
0.2114	-0.00480414	0.00385561	0.00514108
0.2116	-0.00480414	0.00276468	0.0058148
0.2118	-0.00477897	0.00249402	0.00459963
0.212	-0.00488176	0.00207392	0.00429628
0.2122	-0.00473491	0.00255214	0.00486771
0.2124	-0.00472232	0.00254052	0.00419399
0.2126	-0.00477058	0.00273147	0.00525748
0.2128	-0.00458386	0.00335414	0.00411815
0.213	-0.00460694	0.00240602	0.00460316
0.2132	-0.00449785	0.00255048	0.00515342
0.2134	-0.00453561	0.00302039	0.00472133
0.2136	-0.00491953	0.00306522	0.00465078
0.2138	-0.00456498	0.00267667	0.00528746
0.214	-0.00466149	0.00339566	0.00475484
0.2142	-0.00452093	0.00274973	0.0051499
0.2144	-0.004351	0.00252723	0.00495766
0.2146	-0.00465309	0.00318146	0.0047178
0.2148	-0.00438876	0.00320802	0.00529981
0.215	-0.00441394	0.00307685	0.00469487
0.2152	-0.00426709	0.00309677	0.00496295
0.2154	-0.00432373	0.00280287	0.00529981
0.2156	-0.00440135	0.00267999	0.00517635
0.2158	-0.00436778	0.00280121	0.00518693
0.216	-0.00420834	0.00267169	0.00539152
0.2162	-0.00468876	0.00255546	0.00505819
0.2164	-0.00431114	0.00262852	0.00542679
0.2166	-0.00437198	0.00251561	0.00462609
0.2168	-0.00453561	0.00334086	0.00548323
0.217	-0.00434471	0.00388715	0.00473191
0.2172	-0.00455449	0.00305858	0.00461727
0.2174	-0.00439925	0.00304364	0.00547265
0.2176	-0.00462582	0.00253553	0.00523632
0.2178	-0.00461114	0.00218518	0.00562256
0.218	-0.00442023	0.0031333	0.00460669
0.2182	-0.00466568	0.0021885	0.00497353
0.2184	-0.00438666	0.00244089	0.00505642
0.2186	-0.00466358	0.00335913	0.00481656
0.2188	-0.00450834	0.00251561	0.00519575
0.219	-0.00450834	0.00280453	0.00534743
0.2192	-0.00481883	0.00292574	0.00460493
0.2194	-0.00468247	0.0025538	0.00469487
0.2196	-0.00478946	0.00288423	0.00473367
0.2198	-0.00491113	0.00201747	0.00401057
0.22	-0.00496778	0.00217687	0.00452732
0.2202	-0.004844	0.00232798	0.0045432
0.2204	-0.00492372	0.00191784	0.00400704
0.2206	-0.00476638	0.00172357	0.00467018
0.2208	-0.00476218	0.00231801	0.00452909
0.221	-0.0050412	0.00247244	0.00399999
0.2212	-0.00488386	0.00223167	0.00434214
0.2214	-0.00505169	0.00306024	0.00458905
0.2216	-0.00527407	0.00190456	0.00382362
0.2218	-0.0051398	0.00206064	0.0046984
0.222	-0.00526987	0.00220842	0.0057566
0.2222	-0.0053433	0.00220012	0.00468076
0.2224	-0.00519645	0.00253553	0.00480598
0.2226	-0.00502232	0.00241598	0.00465784
0.2228	-0.00529505	0.00082857	0.00466313
0.223	-0.00486078	0.00202743	0.00487477
0.2232	-0.005337	0.00229145	0.00366842
0.2234	-0.00498456	0.00156582	0.00443738
0.2236	-0.00478526	0.00273147	0.00432803
0.2238	-0.00492792	0.00195603	0.00417636
0.224	-0.0048503	0.00113244	0.0047954
0.2242	-0.00487967	0.00167043	0.00436683
0.2244	-0.00477687	0.00172357	0.00343562
0.2246	-0.00481253	0.00181323	0.00466665
0.2248	-0.00473701	0.00212374	0.0046014
0.225	-0.0049405	0.00168704	0.00447441
0.2252	-0.0048419	0.00293239	0.00463314
0.2254	-0.00468456	0.00248904	0.00375837
0.2256	-0.00479785	0.0022848	0.0044215
0.2258	-0.00469715	0.00272317	0.00476365
0.226	-0.00463212	0.00203905	0.003873
0.2262	-0.00495729	0.00195437	0.00448323
0.2264	-0.00493001	0.00245085	0.00491709
0.2266	-0.00496778	0.00223997	0.00404761
0.2268	-0.00488806	0.00261358	0.00443209
0.227	-0.00475379	0.00094647	0.00478306
0.2272	-0.00478946	0.00237115	0.00426807
0.2274	-0.00490694	0.00282944	0.00458023
0.2276	-0.00468247	0.00277132	0.00480069
0.2278	-0.00499505	0.00313662	0.0043245
0.228	-0.00477477	0.00282612	0.00467018
0.2282	-0.00479785	0.00269826	0.00495589
0.2284	-0.00499715	0.00322795	0.00437036
0.2286	-0.00500344	0.00234956	0.00464196
0.2288	-0.00497407	0.00182153	0.00449911
0.229	-0.00509155	0.00341392	0.00413755
0.2292	-0.00511882	0.00347038	0.00424514
0.2294	-0.00476218	0.00228646	0.00426277
0.2296	-0.00496568	0.00220012	0.00449029
0.2298	-0.00491953	0.00183814	0.00489593
0.23	-0.00513561	0.00219182	0.00423103
0.2302	-0.00520274	0.0028394	0.0054021
0.2304	-0.00499505	0.00178832	0.00499293
0.2306	-0.00526148	0.00262022	0.00454849
0.2308	-0.00524889	0.00258037	0.00476895
0.231	-0.00506008	0.00221174	0.00517812
0.2312	-0.00528875	0.00199256	0.00484302
0.2314	-0.00522372	0.00289586	0.00585889
0.2316	-0.00513141	0.0032512	0.00541797
0.2318	-0.00524889	0.0034023	0.00554143
0.232	-0.00520274	0.00387553	0.00427336
0.2322	-0.00487547	0.00287593	0.00398941
0.2324	-0.00510833	0.00329271	0.00480951
0.2326	-0.00528036	0.00232632	0.00486242
0.2328	-0.00508945	0.00186637	0.0047954
0.233	-0.00529085	0.00191784	0.00476718
0.2332	-0.00520693	0.00168371	0.00485713
0.2334	-0.00535379	0.00219182	0.00471075
0.2336	-0.00540623	0.00235952	0.00500704
0.2338	-0.00519015	0.00225658	0.00492944
0.234	-0.00521742	0.00276966	0.00472662
0.2342	-0.00497197	0.00286763	0.00541268
0.2344	-0.00516498	0.00229145	0.0046208
0.2346	-0.00499715	0.00219348	0.00532979
0.2348	-0.00511673	0.00223167	0.00504055
0.235	-0.00497827	0.00193611	0.00427159
0.2352	-0.00540623	0.00262354	0.00480422
0.2354	-0.00508945	0.00174681	0.00539505
0.2356	-0.00513351	0.00252225	0.00499293
0.2358	-0.00529714	0.00288589	0.00529099
0.236	-0.00483981	0.00300545	0.00447794
0.2362	-0.00501183	0.00396686	0.00473544
0.2364	-0.00476428	0.00276302	0.00486242
0.2366	-0.00473072	0.00203739	0.00453791
0.2368	-0.00496148	0.00306522	0.00488006
0.237	-0.00497617	0.00387719	0.00455731
0.2372	-0.00493421	0.00322629	0.0050088
0.2374	-0.00508526	0.00319806	0.00412697
0.2376	-0.00496568	0.00335913	0.00474602
0.2378	-0.00502022	0.00272981	0.00479364
0.238	-0.00483561	0.00334418	0.00439152
0.2382	-0.00506008	0.00280121	0.00482009
0.2384	-0.00485449	0.00345377	0.00474425
0.2386	-0.00495729	0.00380911	0.00453085
0.2388	-0.00496778	0.00432552	0.00444267
0.239	-0.00471393	0.00265509	0.00441798
0.2392	-0.00483561	0.00311836	0.0049312
0.2394	-0.00476009	0.00244919	0.00466136
0.2396	-0.00495519	0.00293405	0.00432098
0.2398	-0.00499085	0.00301209	0.00429628
0.24	-0.00478107	0.00216193	0.00410757
0.2402	-0.00485239	0.0024276	0.0039947
0.2404	-0.00478736	0.00307519	0.00456083
0.2406	-0.00468037	0.00201913	0.00455731
0.2408	-0.00485869	0.00255048	0.00398412
0.241	-0.00473491	0.00261856	0.00415695
0.2412	-0.00490274	0.0022051	0.00482538
0.2414	-0.00489435	0.00231967	0.00328923
0.2416	-0.00489435	0.00305028	0.00381304
0.2418	-0.00488596	0.00295895	0.00441092
0.242	-0.00501183	0.00281449	0.00512521
0.2422	-0.00489855	0.00333256	0.00497706
0.2424	-0.00496568	0.00244255	0.00460316
0.2426	-0.00491533	0.00328108	0.00423279
0.2428	-0.00482932	0.00311836	0.00482891
0.243	-0.00507267	0.0021968	0.00429981
0.2432	-0.00495729	0.00299382	0.00434038
0.2434	-0.00470974	0.00330433	0.00504231
0.2436	-0.00470344	0.00287759	0.00451851
0.2438	-0.00482512	0.00419766	0.00437918
0.244	-0.00492582	0.00359823	0.00509875
0.2442	-0.00491113	0.00315655	0.00402821
0.2444	-0.00482512	0.00396686	0.00453085
0.2446	-0.00480204	0.00440854	0.0053633
0.2448	-0.00506008	0.00434212	0.00412345
0.245	-0.00489855	0.00499137	0.00494355
0.2452	-0.00476009	0.00366133	0.00429276
0.2454	-0.0047475	0.00402995	0.00418341
0.2456	-0.00462163	0.00506277	0.00493826
0.2458	-0.00498036	0.0035534	0.00439858
0.246	-0.00492792	0.00358495	0.00397706
0.2462	-0.00465939	0.00394361	0.00448323
0.2464	-0.00491113	0.00399342	0.00525748
0.2466	-0.00477477	0.00447662	0.00467371
0.2468	-0.00478107	0.00365635	0.00433861
0.247	-0.00502862	0.00302703	0.00549205
0.2472	-0.00463002	0.00456463	0.00427865
0.2474	-0.0044538	0.00471075	0.0046402
0.2476	-0.0046447	0.0049183	0.00543032
0.2478	-0.00453981	0.00423087	0.00450087
0.248	-0.00445589	0.00422755	0.0048924
0.2482	-0.00487757	0.00377756	0.00501057
0.2484	-0.00447687	0.00326614	0.00454143
0.2486	-0.00429855	0.00257871	0.00457142
0.2488	-0.00453981	0.00307187	0.00470369
0.249	-0.00426079	0.0027846	0.00414814
0.2492	-0.00423352	0.00315489	0.00423456
0.2494	-0.00443492	0.00338901	0.00413755
0.2496	-0.00418107	0.00261358	0.00529981
0.2498	-0.00427967	0.00319308	0.00518517
0.25	-0.00430904	0.00319308	0.00478482
0.2502	-0.00404051	0.00311836	0.00399999
0.2504	-0.00417268	0.00218019	0.00482186
0.2506	-0.00452932	0.0029274	0.00532803
0.2508	-0.00410974	0.00302039	0.00483949
0.251	-0.00429855	0.00330599	0.00538976
0.2512	-0.004158	0.00365137	0.00453085
0.2514	-0.00397338	0.00340396	0.0053051
0.2516	-0.00438247	0.0031881	0.00416754
0.2518	-0.00426499	0.00335082	0.00516577
0.252	-0.00432792	0.00389048	0.00443209
0.2522	-0.0043489	0.00362646	0.00432627
0.2524	-0.00428597	0.00384896	0.00400528
0.2526	-0.00441394	0.00325618	0.00514108
0.2528	-0.00436569	0.00427902	0.00433332
0.253	-0.00417478	0.00307685	0.00444796
0.2532	-0.00443282	0.00320636	0.00525043
0.2534	-0.00455449	0.00338071	0.00446207
0.2536	-0.00477897	0.00280453	0.00455731
0.2538	-0.00487547	0.00345045	0.0046402
0.254	-0.00467827	0.002856	0.00482715
0.2542	-0.00482302	0.00253221	0.00529628
0.2544	-0.00495939	0.00274807	0.00498588
0.2546	-0.00468876	0.00300545	0.00459258
0.2548	-0.00503281	0.00197098	0.00516577
0.255	-0.0049489	0.0028477	0.004776
0.2552	-0.00475799	0.00269162	0.00454849
0.2554	-0.00499295	0.00205566	0.00507759
0.2556	-0.00502232	0.00224993	0.00502468
0.2558	-0.00496358	0.00252723	0.00469487
0.256	-0.00519854	0.00193777	0.00503173
0.2562	-0.00497827	0.00177006	0.00462609
0.2564	-0.0052405	0.00300046	0.00502468
0.2566	-0.00503491	0.00220676	0.004679
0.2568	-0.00514819	0.00278959	0.00490828
0.257	-0.00531602	0.00428567	0.0045626
0.2572	-0.00518805	0.00258037	0.00468782
0.2574	-0.00538945	0.00369288	0.00451321
0.2576	-0.00519435	0.00350193	0.00424514
0.2578	-0.00519435	0.00270822	0.00503879
0.258	-0.00519225	0.00230971	0.00458905
0.2582	-0.00526148	0.00289918	0.00457318
0.2584	-0.00515239	0.00308681	0.00536683
0.2586	-0.00525099	0.00288921	0.00487653
0.2588	-0.00516917	0.00311006	0.00441269
0.259	-0.00533071	0.00220012	0.00520281
0.2592	-0.00525099	0.00232133	0.00435449
0.2594	-0.00523001	0.0024907	0.00431039
0.2596	-0.00512722	0.00296892	0.00506171
0.2598	-0.00510204	0.00308681	0.00439329
0.26	-0.00519645	0.00273313	0.00412168
0.2602	-0.00525519	0.00259863	0.0046984
0.2604	-0.00529505	0.00279789	0.0044021
0.2606	-0.00505169	0.00280287	0.00501762
0.2608	-0.00524889	0.00296227	0.00498588
0.261	-0.00527407	0.00372775	0.00445149
0.2612	-0.00520274	0.00263018	0.00456612
0.2614	-0.00532442	0.00253055	0.00416048
0.2616	-0.0052405	0.00340728	0.00396648
0.2618	-0.00546917	0.00307851	0.00421868
0.262	-0.00556357	0.00288091	0.00550263
0.2622	-0.00559085	0.00290914	0.00536859
0.2624	-0.0055426	0.00265343	0.00527335
0.2626	-0.0054377	0.00250565	0.00427688
0.2628	-0.00538525	0.00332758	0.00444443
0.263	-0.0056349	0.00267667	0.00485713
0.2632	-0.00547756	0.00305526	0.00416048
0.2634	-0.00537267	0.00321965	0.00497882
0.2636	-0.00524679	0.00338403	0.00459963
0.2638	-0.00549015	0.00372609	0.00437036
0.264	-0.00570413	0.0029988	0.0044603
0.2642	-0.00559294	0.00339234	0.00432274
0.2644	-0.00549225	0.00358661	0.00441269
0.2646	-0.0055363	0.00272483	0.00479893
0.2648	-0.00546288	0.00338735	0.0045626
0.265	-0.00551742	0.00385561	0.00456436
0.2652	-0.0057398	0.00355008	0.004776
0.2654	-0.00562861	0.00300545	0.00441445
0.2656	-0.0056412	0.0031167	0.00479364
0.2658	-0.00597056	0.00338569	0.00479364
0.266	-0.00555518	0.00386557	0.00409346
0.2662	-0.00572301	0.0029739	0.00508464
0.2664	-0.00581952	0.00473731	0.00538799
0.2666	-0.00560134	0.00461776	0.00465078
0.2668	-0.00578175	0.00338071	0.0044656
0.267	-0.00579434	0.00318478	0.00490651
0.2672	-0.00548805	0.00373439	0.00446736
0.2674	-0.00566008	0.00389712	0.00484655
0.2676	-0.0056328	0.00436537	0.00477776
0.2678	-0.00543351	0.00429065	0.00407406
0.268	-0.00556357	0.00408309	0.00499646
0.2682	-0.00544819	0.00381243	0.00480951
0.2684	-0.0055363	0.00350857	0.00433685
0.2686	-0.00537057	0.00429563	0.00533155
0.2688	-0.00545868	0.00454636	0.00389064
0.269	-0.00525728	0.00456961	0.00463667
0.2692	-0.00526358	0.00430725	0.00467371
0.2694	-0.00533491	0.00393697	0.00444267
0.2696	-0.0053433	0.0040615	0.00496119
0.2698	-0.00543141	0.00408641	0.00522044
0.27	-0.00525099	0.00349362	0.00462433
0.2702	-0.00509785	0.00373439	0.00526454
0.2704	-0.00512931	0.00421759	0.00555554
0.2706	-0.00505379	0.00394195	0.00483949
0.2708	-0.005144	0.00327776	0.0056208
0.271	-0.00523421	0.00395025	0.0047178
0.2712	-0.00490694	0.00328607	0.00535272
0.2714	-0.0050475	0.00451149	0.00522221
0.2716	-0.00502652	0.00350193	0.00584654
0.2718	-0.00497827	0.0044185	0.00492062
0.272	-0.00497407	0.0040532	0.00397177
0.2722	-0.00501393	0.00340562	0.0039947
0.2724	-0.00475589	0.0044019	0.00451145
0.2726	-0.00496987	0.00464931	0.00528217
0.2728	-0.00476009	0.00456795	0.00466665
0.273	-0.00476638	0.00378753	0.00458376
0.2732	-0.00488806	0.00470244	0.00535977
0.2734	-0.00482302	0.00444507	0.00427512
0.2736	-0.00536008	0.00409305	0.00502997
0.2738	-0.00498666	0.00459451	0.00512697
0.274	-0.00497407	0.00454304	0.00426277
0.2742	-0.00499924	0.00536829	0.00519928
0.2744	-0.00501183	0.00484857	0.00484831
0.2746	-0.00491743	0.00444341	0.00520457
0.2748	-0.00519435	0.00446998	0.00554672
0.275	-0.00502862	0.00360321	0.00424161
0.2752	-0.00491323	0.00423585	0.00509875
0.2754	-0.00505379	0.00400837	0.00501057
0.2756	-0.00499505	0.00427238	0.004679
0.2758	-0.00493001	0.0039901	0.00488888
0.276	-0.00485239	0.00454802	0.00484655
0.2762	-0.00477058	0.00495317	0.00459611
0.2764	-0.00482302	0.00428235	0.00506877
0.2766	-0.00476009	0.00335082	0.00468958
0.2768	-0.00500344	0.00429729	0.00472485
0.277	-0.00490274	0.00492329	0.00523103
0.2772	-0.00490904	0.00467754	0.00487653
0.2774	-0.00491113	0.00407977	0.00481127
0.2776	-0.00506008	0.00337407	0.00492591
0.2778	-0.0050391	0.00367129	0.00494178
0.278	-0.00490064	0.00314659	0.00442856
0.2782	-0.00500554	0.00393531	0.00529275
0.2784	-0.00478107	0.00428567	0.00433861
0.2786	-0.00489435	0.00336577	0.00489064
0.2788	-0.00511253	0.00342222	0.00458023
0.279	-0.00488176	0.00374934	0.00467194
0.2792	-0.0047517	0.00346706	0.00575483
0.2794	-0.00479155	0.00378587	0.00459434
0.2796	-0.00489645	0.00435707	0.00497882
0.2798	-0.00502862	0.00342721	0.00431745
0.28	-0.00482093	0.00452976	0.00441092
0.2802	-0.00489016	0.00352517	0.00422221
0.2804	-0.00480204	0.00276966	0.00427512
0.2806	-0.00453352	0.00446832	0.00431392
0.2808	-0.00458596	0.00406815	0.00380422
0.281	-0.00481883	0.00409139	0.00410934
0.2812	-0.00463421	0.0045447	0.00441445
0.2814	-0.00478526	0.00478381	0.00362786
0.2816	-0.00458596	0.00393531	0.00398764
0.2818	-0.00438037	0.0034189	0.00362433
0.282	-0.00460904	0.0046327	0.00600175
0.2822	-0.00462372	0.00380247	0.00542856
0.2824	-0.00457128	0.00422921	0.00431568
0.2826	-0.00457757	0.0049017	0.00461022
0.2828	-0.00445799	0.0036962	0.00440387
0.283	-0.00423981	0.00443843	0.00445501
0.2832	-0.00452722	0.00494653	0.00430687
0.2834	-0.00422513	0.00423253	0.00440034
0.2836	-0.00402583	0.0037593	0.00370193
0.2838	-0.00399646	0.0037045	0.00455554
0.284	-0.00396499	0.00327112	0.00374426
0.2842	-0.00392723	0.00421261	0.00387653
0.2844	-0.004051	0.00371613	0.00468253
0.2846	-0.00399436	0.00441186	0.00417988
0.2848	-0.00403422	0.00438197	0.00388888
0.285	-0.0040573	0.00397184	0.00456436
0.2852	-0.00410765	0.00427072	0.00440034
0.2854	-0.00407828	0.00475558	0.00454849
0.2856	-0.00430485	0.00485853	0.00482715
0.2858	-0.00420415	0.00487181	0.00474249
0.286	-0.00411814	0.0048303	0.00448676
0.2862	-0.00412233	0.00356004	0.00505113
0.2864	-0.00409716	0.00535833	0.00449911
0.2866	-0.00424191	0.00420762	0.00412521
0.2868	-0.00444121	0.00379583	0.00444972
0.287	-0.00420625	0.00325286	0.00424161
0.2872	-0.00427128	0.00359989	0.00399117
0.2874	-0.00436569	0.00415117	0.00441092
0.2876	-0.00412443	0.00378088	0.0050282
0.2878	-0.00433002	0.0034737	0.00416225
0.288	-0.00427128	0.00441684	0.00491709
0.2882	-0.00437408	0.00369288	0.00504055
0.2884	-0.00452512	0.00317813	0.00462785
0.2886	-0.00432583	0.00412294	0.00519046
0.2888	-0.00433002	0.00344215	0.00427688
0.289	-0.00450834	0.00409305	0.00463667
0.2892	-0.00457757	0.00365469	0.00463138
0.2894	-0.00447478	0.00402663	0.00410228
0.2896	-0.00479155	0.00297556	0.00494178
0.2898	-0.00462372	0.00347702	0.00438094
0.29	-0.00471603	0.0038224	0.00525924
0.2902	-0.00496778	0.00431057	0.00547265
0.2904	-0.00492162	0.00438862	0.00435978
0.2906	-0.00525519	0.00392202	0.00491533
0.2908	-0.00509785	0.00398346	0.00510581
0.291	-0.00485869	0.00360321	0.00523808
0.2912	-0.00508736	0.00354178	0.00494002
0.2914	-0.00505379	0.00358661	0.00499117
0.2916	-0.00504959	0.00259033	0.00453614
0.2918	-0.0049468	0.00320802	0.00491004
0.292	-0.00505799	0.00379915	0.00418694
0.2922	-0.00474121	0.00347702	0.00424161
0.2924	-0.00485449	0.00416777	0.00515166
0.2926	-0.00471813	0.00320138	0.00446736
0.2928	-0.0049405	0.00379417	0.00435801
0.293	-0.00485659	0.00436703	0.00539505
0.2932	-0.00471184	0.00414287	0.00447441
0.2934	-0.00491323	0.00380413	0.00489593
0.2936	-0.00529924	0.00414619	0.00527335
0.2938	-0.00489225	0.00368956	0.00489417
0.294	-0.00497197	0.00389048	0.0042275
0.2942	-0.00478526	0.00390376	0.00519399
0.2944	-0.00486498	0.00348864	0.00472838
0.2946	-0.00480834	0.00372443	0.00473191
0.2948	-0.00467617	0.00365303	0.00534919
0.295	-0.0046447	0.00292408	0.00464725
0.2952	-0.00450205	0.00269992	0.00480422
0.2954	-0.00459016	0.00330931	0.00525395
0.2956	-0.0047433	0.00279291	0.00415519
0.2958	-0.00459855	0.00236949	0.00501762
0.296	-0.00450624	0.00298386	0.00464725
0.2962	-0.00460904	0.00288423	0.0044215
0.2964	-0.0044496	0.00321799	0.00466665
0.2966	-0.0045461	0.00188795	0.00462433
0.2968	-0.00458596	0.00338735	0.00423808
0.297	-0.00453142	0.0049183	0.00453262
0.2972	-0.00444121	0.00354012	0.00458552
0.2974	-0.00431743	0.00268332	0.0044603
0.2976	-0.00461533	0.00244753	0.00458552
0.2978	-0.00476428	0.00361318	0.00477247
0.298	-0.00463421	0.0031964	0.00455731
0.2982	-0.00488806	0.00258701	0.00453614
0.2984	-0.00450415	0.00276634	0.00433685
0.2986	-0.00468037	0.00299382	0.00410404
0.2988	-0.00453352	0.0024824	0.00425396
0.299	-0.00480414	0.00246745	0.00497529
0.2992	-0.00461953	0.00297224	0.00506701
0.2994	-0.00468666	0.00350359	0.00499646
0.2996	-0.00482093	0.00290914	0.00446912
0.2998	-0.00480414	0.0031333	0.0042857
0.3	-0.00473491	0.00292242	0.00512697
0.3002	-0.00510624	0.00233296	0.00451321
0.3004	-0.00469505	0.00294235	0.00387477
0.3006	-0.00470764	0.00227982	0.0045432
0.3008	-0.00483141	0.00270158	0.00394708
0.301	-0.00473701	0.00324455	0.00452909
0.3012	-0.0049489	0.00279955	0.00516048
0.3014	-0.0050433	0.00380745	0.00411815
0.3016	-0.00492582	0.00365303	0.00374778
0.3018	-0.00498246	0.00373107	0.00439152
0.302	-0.00490484	0.00311006	0.00538976
0.3022	-0.00474121	0.00379085	0.00493297
0.3024	-0.00501393	0.00416279	0.00483949
0.3026	-0.00498666	0.00363144	0.00425043
0.3028	-0.00493001	0.0040366	0.00455378
0.303	-0.00495309	0.00366797	0.00491357
0.3032	-0.00497617	0.00361318	0.00449911
0.3034	-0.00483141	0.0042757	0.00451498
0.3036	-0.00452722	0.00289918	0.00482538
0.3038	-0.00462582	0.00461942	0.00458023
0.304	-0.004651	0.00283608	0.00501939
0.3042	-0.00487127	0.00331429	0.00454496
0.3044	-0.0047517	0.00375598	0.00404055
0.3046	-0.00467198	0.00359657	0.00486066
0.3048	-0.00487127	0.00381409	0.0044656
0.305	-0.00463421	0.00443511	0.00412521
0.3052	-0.00491533	0.00386723	0.0045626
0.3054	-0.00481883	0.00405984	0.00453085
0.3056	-0.0046468	0.00431057	0.0045044
0.3058	-0.0047475	0.00385893	0.00473367
0.306	-0.00485869	0.00411132	0.00465254
0.3062	-0.00443911	0.00460282	0.00448147
0.3064	-0.00465519	0.00364307	0.00467724
0.3066	-0.0047454	0.00459783	0.00465254
0.3068	-0.00463631	0.00495982	0.0044656
0.307	-0.00493421	0.0029025	0.00534743
0.3072	-0.00472442	0.00405154	0.00474073
0.3074	-0.00470135	0.00375598	0.00487653
0.3076	-0.00471813	0.00429231	0.004679
0.3078	-0.0048503	0.00442183	0.0050141
0.308	-0.00467407	0.00327444	0.00499999
0.3082	-0.00460275	0.00381243	0.00534743
0.3084	-0.00446848	0.00386723	0.0047178
0.3086	-0.00446638	0.00345875	0.00444796
0.3088	-0.00449156	0.00412792	0.00476013
0.309	-0.0043552	0.00375432	0.00407406
0.3092	-0.00456708	0.00312334	0.00456965
0.3094	-0.00457547	0.00399675	0.00459258
0.3096	-0.00438037	0.00402331	0.00480069
0.3098	-0.00437827	0.00331429	0.00510581
0.31	-0.00461324	0.003839	0.0047178
0.3102	-0.00466149	0.00317149	0.00523455
0.3104	-0.00448946	0.00396022	0.00554143
0.3106	-0.00467827	0.00334584	0.00495413
0.3108	-0.00443701	0.00352019	0.00528041
0.311	-0.00448107	0.00298552	0.00488006
0.3112	-0.00432163	0.00292242	0.00500704
0.3114	-0.00438037	0.00407645	0.00536154
0.3116	-0.0044496	0.00337241	0.00607229
0.3118	-0.00429646	0.00394195	0.00468429
0.312	-0.00446219	0.00416279	0.00433508
0.3122	-0.00445799	0.00327112	0.00421339
0.3124	-0.00431743	0.00344049	0.00441092
0.3126	-0.00464051	0.00354178	0.00476542
0.3128	-0.00429855	0.00366465	0.00499293
0.313	-0.00417058	0.00330931	0.00504408
0.3132	-0.00430694	0.00302703	0.00470369
0.3134	-0.00429016	0.00363808	0.00467547
0.3136	-0.00477687	0.00306688	0.00486066
0.3138	-0.00439086	0.00379251	0.00443032
0.314	-0.00436988	0.00335747	0.00438447
0.3142	-0.00456708	0.00426242	0.00509699
0.3144	-0.00440345	0.00300711	0.0044656
0.3146	-0.00428806	0.00338735	0.00442856
0.3148	-0.00436778	0.00268664	0.00516577
0.315	-0.00432583	0.00305692	0.00436507
0.3152	-0.00409506	0.00418106	0.00474778
0.3154	-0.0042524	0.00347038	0.0051111
0.3156	-0.00419156	0.00387719	0.00407759
0.3158	-0.00412023	0.00404988	0.0049118
0.316	-0.00428597	0.00314825	0.00462785
0.3162	-0.00400485	0.00319142	0.00447971
0.3164	-0.00398387	0.00254384	0.00435625
0.3166	-0.00407828	0.00259697	0.00467547
0.3168	-0.00396709	0.00278128	0.00478129
0.317	-0.00417897	0.0034106	0.00508641
0.3172	-0.00391674	0.00343551	0.00410052
0.3174	-0.00393562	0.00239439	0.00502644
0.3176	-0.00408667	0.00250731	0.00461727
0.3178	-0.00411394	0.00227982	0.00495589
0.318	-0.00390415	0.0024027	0.00475836
0.3182	-0.00407198	0.00204902	0.00410228
0.3184	-0.004051	0.00195603	0.00510581
0.3186	-0.00404261	0.00255878	0.00391357
0.3188	-0.00421674	0.00243923	0.00439152
0.319	-0.00391254	0.00179995	0.00477953
0.3192	-0.00403002	0.00239938	0.00456436
0.3194	-0.00413492	0.00214532	0.0047372
0.3196	-0.00410345	0.0022134	0.00399117
0.3198	-0.00411604	0.00282113	0.00444443
0.32	-0.00417478	0.00269162	0.00444796
0.3202	-0.0040594	0.00278128	0.00417636
0.3204	-0.00421883	0.00306356	0.00435978
0.3206	-0.00416219	0.00219514	0.00426101
0.3208	-0.0041496	0.00337407	0.00389064
0.321	-0.00397338	0.00352351	0.00425219
0.3212	-0.00416429	0.00306356	0.00405466
0.3214	-0.00422932	0.00274807	0.00411639
0.3216	-0.00402793	0.00288589	0.00388535
0.3218	-0.00449995	0.00318976	0.00366489
0.322	-0.00432792	0.00294235	0.00528217
0.3222	-0.00427338	0.00316983	0.00513226
0.3224	-0.00441184	0.00381908	0.00479187
0.3226	-0.00446848	0.00339234	0.00413932
0.3228	-0.00437198	0.00395357	0.00502115
0.323	-0.00441394	0.00361152	0.00430334
0.3232	-0.00445589	0.00329769	0.00451321
0.3234	-0.00431114	0.0040366	0.00497706
0.3236	-0.0039566	0.00374934	0.00409523
0.3238	-0.00404681	0.00442515	0.0046984
0.324	-0.00424191	0.00402663	0.0046596
0.3242	-0.0042482	0.00292242	0.00395766
0.3244	-0.00427338	0.00378088	0.00484655
0.3246	-0.00443492	0.00418438	0.00479187
0.3248	-0.00443911	0.00366299	0.0038536
0.325	-0.00427338	0.00401667	0.0050476
0.3252	-0.00449785	0.00396022	0.00460845
0.3254	-0.00442023	0.00381575	0.00458552
0.3256	-0.00423142	0.00423087	0.00484831
0.3258	-0.00449575	0.003213	0.00396824
0.326	-0.00443911	0.0036796	0.00461374
0.3262	-0.0044454	0.00446334	0.00494355
0.3264	-0.00434261	0.00362812	0.00458729
0.3266	-0.00421674	0.00515409	0.00407759
0.3268	-0.0044538	0.00460946	0.00476895
0.327	-0.00449575	0.00374435	0.00456436
0.3272	-0.00403002	0.00346374	0.00471075
0.3274	-0.00447058	0.004196	0.00453262
0.3276	-0.00440345	0.00312002	0.00494355
0.3278	-0.00422303	0.00358495	0.00398588
0.328	-0.0043489	0.00438529	0.00492238
0.3282	-0.00434051	0.00371945	0.00453438
0.3284	-0.00429855	0.00385561	0.00410228
0.3286	-0.0042482	0.00291744	0.00483773
0.3288	-0.00451044	0.0037676	0.00414814
0.329	-0.00441394	0.00384066	0.00389417
0.3292	-0.00433422	0.00420596	0.00435625
0.3294	-0.00439506	0.00449489	0.00441092
0.3296	-0.00427967	0.00410135	0.00489946
0.3298	-0.00423352	0.00419102	0.00493649
0.33	-0.00438666	0.00474396	0.00427865
0.3302	-0.00423142	0.00414453	0.00485889
0.3304	-0.00426709	0.00384564	0.00485184
0.3306	-0.00449366	0.00472569	0.00471956
0.3308	-0.00440135	0.00397184	0.00534566
0.331	-0.00446009	0.00347868	0.00443914
0.3312	-0.00449366	0.00318478	0.00593649
0.3314	-0.00414121	0.00413955	0.00521868
0.3316	-0.00426499	0.0035617	0.00498588
0.3318	-0.00408037	0.00395689	0.00523984
0.332	-0.00422093	0.00385395	0.00440739
0.3322	-0.00411184	0.00369454	0.00354673
0.3324	-0.00401534	0.00409803	0.00419576
0.3326	-0.00407408	0.00364141	0.00439152
0.3328	-0.00426918	0.0050445	0.00421692
0.333	-0.00408667	0.00416777	0.00482715
0.3332	-0.00419786	0.00411962	0.00417636
0.3334	-0.00426709	0.0039021	0.00429805
0.3336	-0.00453352	0.00386225	0.00472309
0.3338	-0.00416429	0.00364971	0.00447441
0.334	-0.00412863	0.00479211	0.00479893
0.3342	-0.00436569	0.00471075	0.00473544
0.3344	-0.00419156	0.0039021	0.00444796
0.3346	-0.00402163	0.00380413	0.00461374
0.3348	-0.00410345	0.00380247	0.00529981
0.335	-0.00412653	0.00389712	0.00429276
0.3352	-0.00414751	0.00350857	0.00518517
0.3354	-0.00443072	0.00316983	0.00453614
0.3356	-0.00437198	0.00315987	0.00436859
0.3358	-0.00412233	0.00302039	0.00520633
0.336	-0.00438666	0.00289253	0.00455202
0.3362	-0.00442862	0.00326614	0.00441621
0.3364	-0.00433422	0.00224661	0.00445501
0.3366	-0.00447478	0.00188961	0.00481833
0.3368	-0.00425869	0.00228314	0.00476718
0.337	-0.00439086	0.003751	0.00512344
0.3372	-0.00436988	0.00373107	0.004776
0.3374	-0.00438666	0.00365469	0.00447618
0.3376	-0.0042566	0.00406482	0.00461022
0.3378	-0.00447058	0.00419434	0.00509346
0.338	-0.00419576	0.00414121	0.00414637
0.3382	-0.00448317	0.00306356	0.00523455
0.3384	-0.00433632	0.00412792	0.00444972
0.3386	-0.00412443	0.00379417	0.00480069
0.3388	-0.00426499	0.00336909	0.00477247
0.339	-0.0044496	0.00435043	0.00430158
0.3392	-0.00432583	0.0036248	0.00527864
0.3394	-0.00443911	0.00273479	0.00467547
0.3396	-0.00423771	0.00393365	0.0046596
0.3398	-0.00436778	0.0039187	0.00490298
0.34	-0.00451673	0.00277464	0.0047178
0.3402	-0.00451463	0.00357001	0.00397353
0.3404	-0.00442862	0.00372111	0.00512344
0.3406	-0.00450415	0.00295729	0.00436507
0.3408	-0.00445799	0.00391538	0.00456083
0.341	-0.00438457	0.00402995	0.00425572
0.3412	-0.00451883	0.00329437	0.00507935
0.3414	-0.0044538	0.0035368	0.00374602
0.3416	-0.00422932	0.00369454	0.0039171
0.3418	-0.00451254	0.00259199	0.00342856
0.342	-0.00447897	0.00350857	0.00519399
0.3422	-0.00456289	0.00403826	0.00566665
0.3424	-0.00455659	0.00292242	0.00473367
0.3426	-0.00462792	0.00373439	0.00451321
0.3428	-0.00467827	0.00443013	0.00462962
0.343	-0.00448317	0.00413456	0.00427336
0.3432	-0.00451883	0.00431057	0.00434567
0.3434	-0.00446219	0.00406316	0.00539681
0.3436	-0.00413282	0.00361152	0.00392591
0.3438	-0.00454401	0.00401169	0.00464373
0.344	-0.00481673	0.00359823	0.00482715
0.3442	-0.00473491	0.00363808	0.00433508
0.3444	-0.00452512	0.00361152	0.00489946
0.3446	-0.0047475	0.00403992	0.00464196
0.3448	-0.00469295	0.00449323	0.00436154
0.345	-0.00453352	0.00395689	0.00487124
0.3452	-0.00482722	0.00424249	0.00484126
0.3454	-0.00466988	0.00493657	0.00399999
0.3456	-0.00450834	0.00483528	0.00496295
0.3458	-0.00471184	0.00394361	0.00505113
0.346	-0.00468876	0.00426242	0.00411463
0.3462	-0.00458806	0.00418604	0.00517988
0.3464	-0.00458596	0.00384232	0.00478658
0.3466	-0.00444121	0.0044102	0.00439329
0.3468	-0.00469925	0.0045995	0.0050917
0.347	-0.0047496	0.00275804	0.00542503
0.3472	-0.00444121	0.00249402	0.00457494
0.3474	-0.00463212	0.00310009	0.00537917
0.3476	-0.00463841	0.00342721	0.00537565
0.3478	-0.00441603	0.00348366	0.00471427
0.348	-0.00465939	0.00302371	0.0047954
0.3482	-0.0047496	0.00296393	0.00463843
0.3484	-0.00455449	0.00389214	0.0048148
0.3486	-0.00469295	0.00332758	0.00489769
0.3488	-0.00468666	0.00467256	0.00476542
0.349	-0.00447478	0.00350027	0.00510228
0.3492	-0.00457338	0.0038938	0.00434567
0.3494	-0.00469505	0.00442016	0.00466489
0.3496	-0.00436149	0.00405486	0.00547265
0.3498	-0.00452722	0.00399675	0.00493826
0.35	-0.00459645	0.00479543	0.00493473
0.3502	-0.00458386	0.00367295	0.00570545
0.3504	-0.00476009	0.00435209	0.00437212
0.3506	-0.00443701	0.00455632	0.00544972
0.3508	-0.00450834	0.0046078	0.00540386
0.351	-0.00456918	0.00428235	0.00452556
0.3512	-0.00438457	0.00385727	0.00562256
0.3514	-0.00449575	0.00437035	0.00523455
0.3516	-0.0043531	0.00372775	0.00647264
0.3518	-0.00417897	0.00370948	0.00557141
0.352	-0.00438457	0.00383402	0.00460493
0.3522	-0.00451463	0.00338735	0.00418517
0.3524	-0.00443911	0.0038224	0.00500351
0.3526	-0.0045524	0.00246413	0.00478482
0.3528	-0.00428387	0.00309013	0.00494002
0.353	-0.00428177	0.00412294	0.0048924
0.3532	-0.00420834	0.00352019	0.004679
0.3534	-0.00429436	0.00530353	0.00519928
0.3536	-0.00473281	0.00421261	0.00429981
0.3538	-0.00452722	0.00415947	0.00514813
0.354	-0.00428387	0.00512586	0.00477247
0.3542	-0.00440974	0.00485853	0.00462609
0.3544	-0.00453771	0.004465	0.00494708
0.3546	-0.00426918	0.00428733	0.00544443
0.3548	-0.00439086	0.00452145	0.00523103
0.355	-0.00430904	0.00321965	0.00480598
0.3552	-0.00422513	0.00432718	0.00515342
0.3554	-0.00447058	0.00428069	0.00455025
0.3556	-0.00407828	0.00390044	0.00533508
0.3558	-0.0043468	0.00390542	0.00482715
0.356	-0.00451883	0.00450983	0.00521163
0.3562	-0.00416848	0.00405818	0.00494884
0.3564	-0.00450624	0.00416943	0.00466313
0.3566	-0.00456079	0.00267833	0.00459258
0.3568	-0.00425869	0.0031416	0.00502468
0.357	-0.00451044	0.00497808	0.00486947
0.3572	-0.0044538	0.00390708	0.00467547
0.3574	-0.00446219	0.00432054	0.00463843
0.3576	-0.00458386	0.00356668	0.00461198
0.3578	-0.00461953	0.00351023	0.00505466
0.358	-0.00449366	0.00363476	0.00505113
0.3582	-0.00473911	0.00296227	0.00485889
0.3584	-0.00473701	0.00408973	0.00433508
0.3586	-0.00443492	0.00332758	0.00502644
0.3588	-0.00465939	0.00415947	0.00433156
0.359	-0.00447897	0.00307353	0.00470722
0.3592	-0.00457757	0.00312666	0.00552732
0.3594	-0.00470974	0.00359325	0.00425043
0.3596	-0.00449575	0.00300711	0.00504937
0.3598	-0.00442862	0.00328773	0.00471956
0.36	-0.00440764	0.00343551	0.00385008
0.3602	-0.00442443	0.0030619	0.00470898
0.3604	-0.00459435	0.00291412	0.00430687
0.3606	-0.00447268	0.00302869	0.00404761
0.3608	-0.00431324	0.00215529	0.00489593
0.361	-0.0045461	0.00367295	0.00425396
0.3612	-0.00459435	0.00362148	0.00394884
0.3614	-0.00452722	0.00293239	0.0045432
0.3616	-0.00449575	0.00331263	0.00373544
0.3618	-0.00429226	0.00384066	0.0035432
0.362	-0.00442023	0.00347868	0.00517459
0.3622	-0.00438247	0.00353181	0.00498235
0.3624	-0.00438666	0.00364307	0.00395237
0.3626	-0.00414751	0.00326116	0.00518517
0.3628	-0.00439086	0.00356502	0.00383597
0.363	-0.00417478	0.00420264	0.00466665
0.3632	-0.00422723	0.00325618	0.00509346
0.3634	-0.00422723	0.00342056	0.00450969
0.3636	-0.00403212	0.00335414	0.00477424
0.3638	-0.00411394	0.00354676	0.00435449
0.364	-0.00418107	0.00348366	0.00413932
0.3642	-0.00412653	0.00352683	0.00527335
0.3644	-0.00409296	0.00387885	0.00429276
0.3646	-0.00411814	0.00401169	0.00481833
0.3648	-0.00412233	0.00438696	0.00497529
0.365	-0.00399017	0.00394527	0.0045432
0.3652	-0.00421464	0.00422257	0.00464549
0.3654	-0.00410135	0.00293239	0.00462962
0.3656	-0.00401114	0.00364971	0.00460845
0.3658	-0.00439925	0.00353015	0.00525043
0.366	-0.00412023	0.00432054	0.00497353
0.3662	-0.00403002	0.00429895	0.00418165
0.3664	-0.00432583	0.00491332	0.00500528
0.3666	-0.00424191	0.00409969	0.00534566
0.3668	-0.00429855	0.00393863	0.00400175
0.367	-0.00433841	0.00306522	0.00507406
0.3672	-0.0040552	0.0031333	0.004679
0.3674	-0.00421464	0.00356004	0.00425219
0.3676	-0.00422303	0.00293903	0.00496471
0.3678	-0.00423142	0.00264346	0.00498764
0.368	-0.00428387	0.00349362	0.00431745
0.3682	-0.00436569	0.00270988	0.00505466
0.3684	-0.00413072	0.00389214	0.00413403
0.3686	-0.00436569	0.00391206	0.0043439
0.3688	-0.00420834	0.00394195	0.00505995
0.369	-0.00423352	0.00396852	0.0045432
0.3692	-0.00453981	0.00375266	0.00390828
0.3694	-0.00461743	0.00323957	0.00475131
0.3696	-0.00427338	0.00400837	0.00452556
0.3698	-0.00453981	0.00399176	0.00460493
0.37	-0.0044454	0.00371613	0.00508464
0.3702	-0.00450624	0.00430227	0.00490651
0.3704	-0.00457338	0.00405818	0.00500175
0.3706	-0.00427548	0.0044019	0.00474602
0.3708	-0.00456498	0.00489008	0.00532979
0.371	-0.00453142	0.00456961	0.00485713
0.3712	-0.00448526	0.00430559	0.00514284
0.3714	-0.0045524	0.0049565	0.00470545
0.3716	-0.00460484	0.00431389	0.00585007
0.3718	-0.00436359	0.00397848	0.00523984
0.372	-0.00462372	0.00451647	0.00422221
0.3722	-0.00456079	0.00405154	0.00496824
0.3724	-0.00443492	0.00520723	0.00468429
0.3726	-0.0045503	0.00412958	0.00472662
0.3728	-0.00452722	0.00526534	0.00486066
0.373	-0.00427757	0.00464433	0.00511286
0.3732	-0.00443911	0.0039901	0.00489064
0.3734	-0.00440345	0.00428401	0.0051499
0.3736	-0.00465519	0.00443677	0.00477247
0.3738	-0.00457967	0.00405652	0.00496471
0.374	-0.00440135	0.00331927	0.00568429
0.3742	-0.00438666	0.00368458	0.00486771
0.3744	-0.00431743	0.00438696	0.00511462
0.3746	-0.00436569	0.00370616	0.00505642
0.3748	-0.00443911	0.00420596	0.00535801
0.375	-0.0043489	0.00437035	0.00542327
0.3752	-0.00433632	0.00438529	0.00447265
0.3754	-0.00461324	0.00500797	0.0046596
0.3756	-0.00450624	0.00472901	0.00545501
0.3758	-0.00440555	0.00360654	0.00544443
0.376	-0.00438457	0.00418106	0.00506171
0.3762	-0.00432583	0.00453972	0.00457142
0.3764	-0.00429226	0.00382738	0.00463314
0.3766	-0.00440345	0.00370948	0.0050335
0.3768	-0.00440135	0.00352351	0.00419223
0.377	-0.00443492	0.00493989	0.00546207
0.3772	-0.00456918	0.00440024	0.00463314
0.3774	-0.00456498	0.00406981	0.00515872
0.3776	-0.00449785	0.00420098	0.00459082
0.3778	-0.00467407	0.00498971	0.00477776
0.378	-0.00456498	0.00430891	0.00492591
0.3782	-0.00481883	0.00485355	0.00515342
0.3784	-0.0048482	0.00424083	0.00529981
0.3786	-0.00471813	0.003839	0.00525572
0.3788	-0.004844	0.00458621	0.00444267
0.379	-0.00479155	0.00492827	0.00502468
0.3792	-0.00493421	0.00350027	0.0052081
0.3794	-0.00477267	0.00404822	0.00485889
0.3796	-0.00490694	0.00445836	0.00513932
0.3798	-0.0047475	0.00402829	0.00458376
0.38	-0.00507057	0.00500465	0.00504408
0.3802	-0.00496568	0.00398512	0.00497353
0.3804	-0.00503281	0.00445836	0.00447618
0.3806	-0.00490904	0.00531848	0.0046402
0.3808	-0.00512722	0.00418438	0.00484126
0.381	-0.0052426	0.00409305	0.0046208
0.3812	-0.00524679	0.00435043	0.00544267
0.3814	-0.00534959	0.00373273	0.00467018
0.3816	-0.00558875	0.00351853	0.0046402
0.3818	-0.00539365	0.00397516	0.00411463
0.382	-0.00534749	0.00382406	0.00520986
0.3822	-0.00537686	0.00383236	0.00515519
0.3824	-0.00542092	0.00479709	0.00527159
0.3826	-0.00517966	0.00340728	0.00499999
0.3828	-0.00526987	0.00356502	0.00485889
0.383	-0.00528665	0.0044899	0.00523455
0.3832	-0.00542511	0.00415449	0.00418517
0.3834	-0.00540833	0.00424083	0.00492591
0.3836	-0.00493211	0.00389712	0.00511992
0.3838	-0.00505589	0.00378421	0.00429452
0.384	-0.00511043	0.00508767	0.00508993
0.3842	-0.00507687	0.00440356	0.00492944
0.3844	-0.00503701	0.00474396	0.00429981
0.3846	-0.00507267	0.00514081	0.00485713
0.3848	-0.00499924	0.00493159	0.00409523
0.385	-0.00515449	0.00495982	0.00405643
0.3852	-0.00521952	0.0046792	0.00532803
0.3854	-0.00495309	0.00466923	0.00392415
0.3856	-0.00513561	0.00487679	0.00473544
0.3858	-0.00521533	0.00479543	0.00486418
0.386	-0.00513561	0.00435873	0.00436507
0.3862	-0.00523631	0.00459783	0.00461727
0.3864	-0.00509155	0.00466093	0.00518341
0.3866	-0.00511253	0.00486019	0.00454849
0.3868	-0.00531602	0.00465761	0.00438447
0.387	-0.00505379	0.00357499	0.0053439
0.3872	-0.00506428	0.0045447	0.00515519
0.3874	-0.00522372	0.00435707	0.00412345
0.3876	-0.00502862	0.0045995	0.00553967
0.3878	-0.00516288	0.0054563	0.00522397
0.388	-0.00540204	0.00443013	0.00464902
0.3882	-0.00516917	0.00478713	0.00578834
0.3884	-0.00506218	0.00568544	0.00476718
0.3886	-0.00534539	0.00589632	0.0050476
0.3888	-0.00505799	0.00550777	0.00508641
0.389	-0.00507896	0.00538158	0.00427159
0.3892	-0.00529505	0.00490004	0.00537565
0.3894	-0.00507687	0.00476388	0.00484655
0.3896	-0.0049489	0.00527863	0.00503526
0.3898	-0.0052447	0.00437865	0.00563667
0.39	-0.00504959	0.00562732	0.00447265
0.3902	-0.0050475	0.00546294	0.0053051
0.3904	-0.005337	0.00502624	0.00588534
0.3906	-0.00515239	0.0057502	0.00491886
0.3908	-0.00516917	0.00570205	0.00510051
0.391	-0.00517337	0.00487679	0.00552732
0.3912	-0.00498456	0.00468418	0.00497353
0.3914	-0.00492162	0.00520058	0.00542327
0.3916	-0.00499085	0.00529689	0.00560492
0.3918	-0.00490064	0.00476056	0.00523103
0.392	-0.00510624	0.00522715	0.00416048
0.3922	-0.00490904	0.00429231	0.00397177
0.3924	-0.00477477	0.00521885	0.00498235
0.3926	-0.00506428	0.00519394	0.00460845
0.3928	-0.00488176	0.00432718	0.00491357
0.393	-0.00470764	0.00527198	0.00454672
0.3932	-0.00476848	0.00536995	0.00540034
0.3934	-0.00490484	0.00508435	0.00465078
0.3936	-0.00506847	0.00511092	0.00487829
0.3938	-0.00498456	0.0045364	0.00543561
0.394	-0.00461953	0.0053135	0.00391886
0.3942	-0.00480414	0.00509099	0.0046984
0.3944	-0.00470344	0.00502624	0.00487124
0.3946	-0.00460275	0.00397682	0.00404055
0.3948	-0.00458177	0.00499303	0.00472133
0.395	-0.00459435	0.00447828	0.00523455
0.3952	-0.00451463	0.00461776	0.00483244
0.3954	-0.00470135	0.00443677	0.00521163
0.3956	-0.00455449	0.00497974	0.00408112
0.3958	-0.00470135	0.00421095	0.00425219
0.396	-0.00473491	0.00387553	0.00470369
0.3962	-0.00473072	0.00449323	0.00473896
0.3964	-0.0048503	0.00373605	0.00517812
0.3966	-0.00470764	0.00314825	0.00476718
0.3968	-0.00446429	0.00312168	0.00452556
0.397	-0.00475799	0.00443345	0.00480775
0.3972	-0.00456498	0.0046244	0.00472133
0.3974	-0.00470344	0.00455632	0.00474073
0.3976	-0.00464051	0.00415615	0.00498059
0.3978	-0.0046489	0.00459617	0.00526806
0.398	-0.00460904	0.00375764	0.0044462
0.3982	-0.00459226	0.00323459	0.00462433
0.3984	-0.00472023	0.00505612	0.00449734
0.3986	-0.00443282	0.0044816	0.00443209
0.3988	-0.00466149	0.00491498	0.00471251
0.399	-0.00463841	0.00471075	0.00423985
0.3992	-0.00478526	0.00445171	0.0053439
0.3994	-0.00490904	0.00524376	0.00515872
[truncated: 35,500 more rows]

## Sheet: Fig.S1C
MMTV-PyMT WT			MMTV-PyMT BK-KO
ctrl	+ IBTX		ctrl	+ IBTX
-51.5	-34.7		-44	-37.6
-45.7	-32.5		-25.9	-39.8
-40	-26		-36	-23.1
-44.5	-27		-28.5	-31.2
-52.3	-29.1		-31.1	-30.5
-55.6	-37.6		-34.5	-30.5
-36.3	-34.8		-32	-38.1
-54.2	-19.9		-25.7	-40
-37.3	-27.7			-32.5
				-29

## Sheet: Fig.S1D
MMTV-PyMT WT			MMTV-PyMT BK-KO
ctrl	+ IBTX		ctrl	+ IBTX
1.92403	2.08058		1.93237	2.14162
1.793	1.80318		2.04828	1.87478
1.79895	1.86204		1.92628	2.0462
1.74453	1.97708		1.79306	1.66545
1.94391	2.09646		1.72746	1.84012
2.0161	1.76614		1.99803	2.05404
2.09635	2.09157		1.91378	2.07987
1.90656	1.85027		1.88448	1.8118
1.70078	1.87288		1.99317	2.03732
1.57811	2.04903		1.79674	1.98899
2.02596	1.86768		1.82344	2.21202
1.83457	1.88146		1.46166	1.93416
1.69621	1.7322		1.97831	1.76555
2.06135	1.74553		1.96885	1.98723
1.77367	1.93605		1.94324	1.84398
1.82224	1.86208		1.96526	1.78622
1.8589	1.91287		1.73122	1.80647
1.59245	2.00565		1.92186	1.78724
1.70692	1.66351		1.99593	1.93956
1.86095	2.07345		1.94224	1.67136
1.90207	1.64306		2.11611	2.17339
1.75529	1.87067		1.89912	1.90941
1.6936	1.86315		2.0171	1.83316
1.83498	1.91371		2.00087	1.86135
1.78576	2.10928		1.99048	1.72674
1.76752	1.68704		2.0827	1.89462
1.76177	1.80359		1.73553	1.72835
2.20287	2.31181		2.07013	1.93049
1.99184	2.24413		1.82041	1.95623
1.86836	2.0425		2.06239	1.78123
1.43891	1.84523		1.88955	1.72681
1.69781	1.89431		1.77285	1.79213
1.63906	1.73358		2.00982	1.99587
1.65181	1.67571		2.05661	1.7941
1.83284	1.64018		1.79823	1.87813
1.79979	1.60097			1.55506
1.88785	1.94804
1.98706	1.92125
1.85226	1.84962
1.7921	1.77613
1.66901	1.75205
1.72897	1.51361
1.70198	1.85929
1.69886	1.58841
1.87755	1.711
1.74977	1.86091
1.97164	1.73877
1.81676	1.72085
1.74862	1.64542
1.58836	1.73061
1.59494
1.72213
1.58076
1.77784
1.81792
1.89413
1.50793
1.70819
1.45821
1.58864
1.45709
1.6304

## Sheet: Fig.S1F
	MDA-MB-453
Time (sec)	ctrl	+ PAX	+ IBTX
0	0.0399629	-0.0197112	0.018542
0.0002	0.0396913	-0.0195717	0.018582
0.0004	0.0394275	-0.0194378	0.0185019
0.0006	0.0394693	-0.0197474	0.0185778
0.0008	0.0396443	-0.0193876	0.0184027
0.001	0.0394249	-0.019792	0.0184787
0.0012	0.0395059	-0.019223	0.0184407
0.0014	0.0395633	-0.0194685	0.018447
0.0016	0.0395137	-0.0193067	0.0182339
0.0018	0.0395059	-0.0196972	0.0184006
0.002	0.0390932	-0.0192983	0.0183099
0.0022	0.0394275	-0.019541	0.0183014
0.0024	0.0392786	-0.0194518	0.0184133
0.0026	0.0390958	-0.0194573	0.0184681
0.0028	0.0391219	-0.0195271	0.018409
0.003	0.0394197	-0.0195048	0.0184723
0.0032	0.0390906	-0.019223	0.0183964
0.0034	0.0392159	-0.0196191	0.0183985
0.0036	0.0390827	-0.0194685	0.0184512
0.0038	0.0388503	-0.0196247	0.0184238
0.004	0.0389521	-0.0197893	0.0185462
0.0042	0.0386518	-0.0193569	0.0184006
0.0044	0.0392447	-0.0196805	0.0183753
0.0046	0.0389678	-0.0194378	0.0183901
0.0048	0.0391167	-0.0195131	0.0184238
0.005	0.039007	-0.0197279	0.0183436
0.0052	0.0391585	-0.0193848	0.0183141
0.0054	0.0391611	-0.0194043	0.0184386
0.0056	0.0393413	-0.0196303	0.0183943
0.0058	0.0396782	-0.0195075	0.0184365
0.006	0.0395137	-0.0194406	0.0183584
0.0062	0.0391794	-0.0196498	0.0183837
0.0064	0.0393465	-0.0192983	0.0184618
0.0066	0.0391454	-0.0194434	0.0183605
0.0068	0.0392316	-0.0196693	0.0184744
0.007	0.0392734	-0.01929	0.0185124
0.0072	0.0390175	-0.0196749	0.0183457
0.0074	0.0390827	-0.0193569	0.0183056
0.0076	0.0392212	-0.0194936	0.0184555
0.0078	0.0389626	-0.0195326	0.0183837
0.008	0.0392238	-0.0195131	0.0183246
0.0082	0.0390697	-0.0193458	0.0183626
0.0084	0.0392159	-0.0196861	0.0182529
0.0086	0.0393256	-0.0193151	0.0182698
0.0088	0.0392499	-0.0195243	0.0183922
0.009	0.0389417	-0.0196247	0.0182445
0.0092	0.0391637	-0.019396	0.0182234
0.0094	0.0395738	-0.0194573	0.0182276
0.0096	0.039592	-0.0193904	0.0182782
0.0098	0.0395764	-0.0192788	0.0183542
0.01	0.0395059	-0.0193792	0.018217
0.0102	0.0394197	-0.0193569	0.0183141
0.0104	0.0400308	-0.019276	0.0184597
0.0106	0.0393988	-0.0194992	0.0183879
0.0108	0.0398872	-0.0192426	0.0183099
0.011	0.039989	-0.0193458	0.0183204
0.0112	0.0397905	-0.0197335	0.0183162
0.0114	0.0399394	-0.0193625	0.0182951
0.0116	0.0401301	-0.0191868	0.0183563
0.0118	0.0395267	-0.0196052	0.0183141
0.012	0.0398689	-0.0194852	0.018255
0.0122	0.0398819	-0.0193848	0.0184301
0.0124	0.039579	-0.0196498	0.0182297
0.0126	0.0395947	-0.0194797	0.0182803
0.0128	0.0397644	-0.0194852	0.0183964
0.013	0.0394902	-0.0196135	0.0183225
0.0132	0.0395294	-0.0194964	0.01835
0.0134	0.0394745	-0.0193597	0.0184766
0.0136	0.0391428	-0.0196637	0.0182677
0.0138	0.039451	-0.0193904	0.018255
0.014	0.0396208	-0.0193988	0.0183436
0.0142	0.0390697	-0.0193513	0.0182128
0.0144	0.039767	-0.0194936	0.0183099
0.0146	0.0394144	-0.0193095	0.0184133
0.0148	0.0393518	-0.0194936	0.0183901
0.015	0.0396991	-0.0194267	0.0184639
0.0152	0.039357	-0.0191477	0.0184027
0.0154	0.0393126	-0.0194685	0.0183795
0.0156	0.0393309	-0.0194824	0.0184597
0.0158	0.0393753	-0.0192286	0.0183964
0.016	0.0395999	-0.0196358	0.0184934
0.0162	0.0393518	-0.0194239	0.0184491
0.0164	0.0394406	-0.019237	0.0184723
0.0166	0.0397357	-0.019647	0.0183415
0.0168	0.039592	-0.0195996	0.0182888
0.017	0.039592	-0.0193374	0.0183162
0.0172	0.0396835	-0.019739	0.018447
0.0174	0.0393544	-0.0195187	0.0183626
0.0176	0.0396234	-0.0193458	0.0184407
0.0178	0.0395503	-0.0195326	0.0183647
0.018	0.0396443	-0.019343	0.0184449
0.0182	0.039451	-0.01929	0.0184069
0.0184	0.0393178	-0.0195522	0.0182782
0.0186	0.038785	-0.0192649	0.0183922
0.0188	0.0387014	-0.0193764	0.0184301
0.019	0.039007	-0.019898	0.0184344
0.0192	0.0387197	-0.0193039	0.0184069
0.0194	0.0390227	-0.0193932	0.0185335
0.0196	0.0391141	-0.0195801	0.0182487
0.0198	0.0389234	-0.0193318	0.0184702
0.02	0.0393753	-0.0192091	0.0183415
0.0202	0.0391402	-0.0194964	0.0184133
0.0204	0.0387484	-0.0194518	0.0184238
0.0206	0.0390201	-0.0194797	0.0184702
0.0208	0.0385421	-0.0194713	0.0184744
0.021	0.0387902	-0.0192537	0.0184323
0.0212	0.0390827	-0.0194824	0.0184639
0.0214	0.0388607	-0.0193792	0.0184723
0.0216	0.0391402	-0.0191979	0.0183373
0.0218	0.0386309	-0.0194601	0.018466
0.022	0.0389469	-0.0192509	0.0184196
0.0222	0.0387902	-0.0193792	0.018428
0.0224	0.038866	-0.0195271	0.0184006
0.0226	0.0390279	-0.0190473	0.0183732
0.0228	0.039276	-0.019488	0.0183605
0.023	0.0395085	-0.0192705	0.0183774
0.0232	0.0388216	-0.0192705	0.0184048
0.0234	0.0391977	-0.0194629	0.0184196
0.0236	0.0391036	-0.0196916	0.0182846
0.0238	0.0391271	-0.0193848	0.0184344
0.024	0.0393596	-0.0195912	0.0185356
0.0242	0.038866	-0.0193123	0.0184133
0.0244	0.0392107	-0.0195075	0.0183837
0.0246	0.0392342	-0.0194099	0.0184534
0.0248	0.0389861	-0.0194629	0.0184217
0.025	0.0391898	-0.0195717	0.0184133
0.0252	0.0389913	-0.0194406	0.0184112
0.0254	0.0392812	-0.0192593	0.018466
0.0256	0.0395555	-0.0193653	0.0184998
0.0258	0.0394615	-0.0196721	0.0183816
0.026	0.0391507	-0.0193876	0.0183837
0.0262	0.0390801	-0.0196693	0.0184512
0.0264	0.0390827	-0.019343	0.0183352
0.0266	0.0389809	-0.0194824	0.0184112
0.0268	0.0392185	-0.0192509	0.0185272
0.027	0.0392786	-0.0192509	0.0183901
0.0272	0.0390383	-0.0198144	0.0183584
0.0274	0.0390723	-0.0191505	0.018409
0.0276	0.0387406	-0.0194518	0.0183753
0.0278	0.0390436	-0.0197	0.0184787
0.028	0.0393283	-0.0195271	0.0184723
0.0282	0.0387145	-0.0194127	0.0184133
0.0284	0.0392029	-0.0196777	0.0185525
0.0286	0.0396887	-0.0193039	0.0184744
0.0288	0.0393387	-0.0196163	0.0184027
0.029	0.0394693	-0.0195828	0.0184618
0.0292	0.0395764	-0.0193513	0.0182402
0.0294	0.0390723	-0.0196721	0.0183457
0.0296	0.0389313	-0.0194657	0.0183795
0.0298	0.0389156	-0.019555	0.0182719
0.03	0.038738	-0.0196498	0.0184112
0.0302	0.0392865	-0.0196693	0.0184449
0.0304	0.0388346	-0.0193904	0.0183879
0.0306	0.0386466	-0.0194573	0.0184301
0.0308	0.0392055	-0.0195577	0.0184069
0.031	0.0392368	-0.0193681	0.0184512
0.0312	0.039101	-0.0197474	0.0184534
0.0314	0.0392943	-0.0195828	0.0183985
0.0316	0.0391533	-0.0194462	0.0182255
0.0318	0.0387223	-0.0197223	0.0184766
0.032	0.0394092	-0.0196024	0.0184238
0.0322	0.0389287	-0.0193039	0.0183668
0.0324	0.0390749	-0.0197056	0.0183858
0.0326	0.0393596	-0.0196442	0.0183394
0.0328	0.0392786	-0.0194267	0.0182993
0.033	0.0389626	-0.0197084	0.0184744
0.0332	0.0394588	-0.0196247	0.0183922
0.0334	0.0395842	-0.0193625	0.0184512
0.0336	0.0394301	-0.0195605	0.0184386
0.0338	0.0392081	-0.019449	0.0183542
0.034	0.0393413	-0.019488	0.0183985
0.0342	0.0389731	-0.019382	0.0184723
0.0344	0.0393909	-0.019435	0.0183689
0.0346	0.0388712	-0.0194016	0.0184449
0.0348	0.0393909	-0.0196275	0.0183964
0.035	0.0395476	-0.0196693	0.0184112
0.0352	0.039088	-0.0192342	0.0183689
0.0354	0.0394823	-0.0195354	0.0184977
0.0356	0.0391089	-0.0197586	0.0183415
0.0358	0.0390958	-0.0194183	0.0184723
0.036	0.0395006	-0.019647	0.0183943
0.0362	0.03937	-0.0194713	0.0183563
0.0364	0.0392055	-0.0195187	0.0185019
0.0366	0.03972	-0.0196777	0.0184133
0.0368	0.0394771	-0.0192203	0.0183099
0.037	0.0393465	-0.0194629	0.0184323
0.0372	0.0393962	-0.019555	0.0183922
0.0374	0.0393465	-0.0193541	0.018504
0.0376	0.0392969	-0.0193513	0.0184702
0.0378	0.0397487	-0.0195633	0.0184744
0.038	0.0393126	-0.0194378	0.0185631
0.0382	0.0391637	-0.0195828	0.018447
0.0384	0.0391507	-0.0195438	0.0184217
0.0386	0.0392055	-0.0192509	0.018447
0.0388	0.0391089	-0.0193764	0.0184323
0.039	0.0390775	-0.0196805	0.0184808
0.0392	0.0391428	-0.0192816	0.0184512
0.0394	0.0389104	-0.0194183	0.0183415
0.0396	0.0389469	-0.0194936	0.0184998
0.0398	0.0391219	-0.019131	0.0185863
0.04	0.0396678	-0.0197	0.018542
0.0402	0.0388451	-0.0195048	0.0184428
0.0404	0.0389104	-0.0192983	0.0184744
0.0406	0.0394719	-0.0194908	0.0186053
0.0408	0.0393596	-0.0193402	0.0183521
0.041	0.0392447	-0.0193792	0.0184597
0.0412	0.0392447	-0.0193876	0.0184977
0.0414	0.0389626	-0.0191645	0.0184512
0.0416	0.0391611	-0.0194155	0.0183478
0.0418	0.0391663	-0.0191784	0.0184407
0.042	0.0387719	-0.019343	0.0184787
0.0422	0.0391219	-0.0192956	0.0185188
0.0424	0.0390436	-0.0192398	0.0184998
0.0426	0.0389965	-0.0194685	0.0183985
0.0428	0.0390148	-0.0192426	0.0184112
0.043	0.0395581	-0.019435	0.0184618
0.0432	0.0392708	-0.0191505	0.0185209
0.0434	0.0391402	-0.0193764	0.0183267
0.0436	0.0392891	-0.0193709	0.0183689
0.0438	0.0391689	-0.0197056	0.0183858
0.044	0.0391559	-0.0192705	0.0184407
0.0442	0.0396782	-0.0193904	0.0186053
0.0444	0.0392212	-0.0195661	0.0184407
0.0446	0.0391977	-0.019449	0.0183901
0.0448	0.0390749	-0.0194601	0.0184344
0.045	0.0391324	-0.0195661	0.0183901
0.0452	0.0397723	-0.019276	0.01835
0.0454	0.0393309	-0.0195661	0.018523
0.0456	0.0396286	-0.0193681	0.0183162
0.0458	0.039707	-0.0192788	0.018428
0.046	0.0394092	-0.019541	0.0184639
0.0462	0.0394823	-0.0194378	0.0184175
0.0464	0.0394092	-0.0192788	0.0183858
0.0466	0.0391454	-0.019594	0.0184829
0.0468	0.0393935	-0.0195271	0.0183668
0.047	0.0393544	-0.0193402	0.0184259
0.0472	0.0390175	-0.0195912	0.0182824
0.0474	0.0388425	-0.0191087	0.0182951
0.0476	0.0390253	-0.0194378	0.0182972
0.0478	0.0385734	-0.0194518	0.0184871
0.048	0.0389861	-0.0192928	0.018274
0.0482	0.0390827	-0.0193402	0.0184048
0.0484	0.0390279	-0.0194518	0.0184217
0.0486	0.0397879	-0.0193541	0.0182698
0.0488	0.0394771	-0.0194629	0.0184259
0.049	0.0390122	-0.0194294	0.0182993
0.0492	0.0393779	-0.0194741	0.0182972
0.0494	0.0395868	-0.0193123	0.0184407
0.0496	0.0392081	-0.0195075	0.0183626
0.0498	0.0394902	-0.0192454	0.0183267
0.05	0.0392395	-0.0195773	0.0184723
0.0502	0.0389861	-0.0192509	0.0183605
0.0504	0.0393361	-0.0195912	0.0182761
0.0506	0.0390331	-0.0195131	0.0183331
0.0508	0.0389182	-0.0191952	0.0182571
0.051	0.039545	-0.0193653	0.0183352
0.0512	0.0391585	-0.0194992	0.0183879
0.0514	0.0389861	-0.0193486	0.0183626
0.0516	0.0394432	-0.0194629	0.0182276
0.0518	0.0391271	-0.0195661	0.018428
0.052	0.0392159	-0.0195187	0.0184217
0.0522	0.0393779	-0.0194629	0.0183014
0.0524	0.0390331	-0.0196163	0.0184576
0.0526	0.0391924	-0.019541	0.0183141
0.0528	0.0390201	-0.0190947	0.0183711
0.053	0.0391741	-0.0195884	0.0185462
0.0532	0.0389678	-0.0194406	0.0184787
0.0534	0.0389313	-0.0195522	0.0183689
0.0536	0.0386884	-0.0193988	0.0184133
0.0538	0.0386544	-0.0190055	0.0184787
0.054	0.0393831	-0.0195438	0.0184344
0.0542	0.0391141	-0.0193123	0.0184766
0.0544	0.039148	-0.0191394	0.0185145
0.0546	0.0392264	-0.0194378	0.0184955
0.0548	0.0391167	-0.0194434	0.0185293
0.055	0.0394171	-0.0193597	0.0185441
0.0552	0.0391898	-0.019488	0.0184534
0.0554	0.0390592	-0.0194294	0.0185504
0.0556	0.0393727	-0.0193011	0.0185061
0.0558	0.0389469	-0.0195633	0.0185567
0.056	0.0390697	-0.0193932	0.0183732
0.0562	0.0392891	-0.0195215	0.0185567
0.0564	0.0393779	-0.0196303	0.0184702
0.0566	0.0390044	-0.0192872	0.0183879
0.0568	0.0391872	-0.019396	0.018428
0.057	0.0390619	-0.0195996	0.0183436
0.0572	0.0392708	-0.0192621	0.0185757
0.0574	0.0393727	-0.0193458	0.0183901
0.0576	0.0391611	-0.0195689	0.0183816
0.0578	0.0389208	-0.0193458	0.0184048
0.058	0.0396103	-0.0193151	0.0184386
0.0582	0.0392891	-0.0195243	0.0184259
0.0584	0.0391715	-0.0191952	0.0185061
0.0586	0.0385996	-0.0194099	0.0184217
0.0588	0.0389835	-0.0195438	0.0183605
0.059	0.0392029	-0.0193235	0.018523
0.0592	0.0390592	-0.019382	0.0183879
0.0594	0.0388764	-0.0194155	0.018542
0.0596	0.0394406	-0.0190808	0.0184702
0.0598	0.0390383	-0.019488	0.0184766
0.06	0.0391507	-0.0192398	0.0186074
0.0602	0.0392395	-0.0192621	0.0183668
0.0604	0.0389469	-0.019541	0.0184555
0.0606	0.0392734	-0.0192537	0.0185504
0.0608	0.0389913	-0.0194211	0.0183816
0.061	0.0392368	-0.0193876	0.0183478
0.0612	0.0394615	-0.019343	0.0184238
0.0614	0.0390801	-0.0194322	0.0184344
0.0616	0.0394458	-0.0193569	0.0183542
0.0618	0.039545	-0.0190027	0.0184175
0.062	0.0391794	-0.0193597	0.0182824
0.0622	0.0392969	-0.0194769	0.0184154
0.0624	0.0393674	-0.0190445	0.01835
0.0626	0.038879	-0.019555	0.0184112
0.0628	0.0390801	-0.0192007	0.0183436
0.063	0.0392865	-0.0191812	0.0185251
0.0632	0.0391637	-0.0192677	0.0183373
0.0634	0.0393518	-0.0191728	0.0183985
0.0636	0.0392891	-0.019488	0.0183204
0.0638	0.0392812	-0.0193179	0.0183668
0.064	0.0393622	-0.0195048	0.0185061
0.0642	0.0394928	-0.0191505	0.0183225
0.0644	0.0394745	-0.0196414	0.0183647
0.0646	0.0391715	-0.0191477	0.018485
0.0648	0.0393596	-0.0194713	0.0183732
0.065	0.0393439	-0.0194462	0.0184702
0.0652	0.0395137	-0.0193709	0.0184112
0.0654	0.0396991	-0.0195466	0.0183647
0.0656	0.0394432	-0.0193151	0.0183183
0.0658	0.0395738	-0.0195745	0.0184386
0.066	0.0395999	-0.0193653	0.0183922
0.0662	0.0389939	-0.0192007	0.0183014
0.0664	0.039276	-0.0195131	0.0184344
0.0666	0.0392421	-0.0192007	0.0182677
0.0668	0.0391533	-0.0192454	0.0184639
0.067	0.0396051	-0.0194462	0.0183605
0.0672	0.0389156	-0.0194657	0.018274
0.0674	0.0388007	-0.0192203	0.018331
0.0676	0.0391297	-0.0192147	0.0183858
0.0678	0.0393439	-0.0195326	0.0183415
0.068	0.0392421	-0.0194406	0.0182993
0.0682	0.0393727	-0.0193876	0.0183225
0.0684	0.0393361	-0.0196303	0.0182487
0.0686	0.0396364	-0.0191979	0.018312
0.0688	0.039579	-0.0195661	0.0183373
0.069	0.0391297	-0.019449	0.0183246
0.0692	0.0390357	-0.0194294	0.0182824
0.0694	0.0395137	-0.0194601	0.0183943
0.0696	0.0389156	-0.0193513	0.0182107
0.0698	0.0393387	-0.0196721	0.0183605
0.07	0.0393518	-0.0194322	0.0182466
0.0702	0.0390906	-0.019237	0.0184112
0.0704	0.0393518	-0.0196275	0.0184555
0.0706	0.0390697	-0.0195354	0.0183141
0.0708	0.0390932	-0.0192481	0.0183099
0.071	0.0393204	-0.0196609	0.018428
0.0712	0.0389652	-0.0196135	0.0182719
0.0714	0.039088	-0.0194518	0.0182297
0.0716	0.0394406	-0.019555	0.0184702
0.0718	0.0390514	-0.0193737	0.0183837
0.072	0.0392159	-0.0196749	0.0183816
0.0722	0.0394223	-0.0197307	0.0185504
0.0724	0.0388242	-0.0195884	0.0183078
0.0726	0.0389965	-0.0194546	0.0184069
0.0728	0.0391454	-0.0196693	0.0184723
0.073	0.0389939	-0.0194099	0.0185145
0.0732	0.039276	-0.0196693	0.0183605
0.0734	0.039485	-0.0196275	0.0185799
0.0736	0.0390357	-0.0191979	0.0182761
0.0738	0.0389626	-0.0195048	0.0184766
0.074	0.0392865	-0.0194992	0.0182909
0.0742	0.0392525	-0.0191477	0.0184259
0.0744	0.0390383	-0.0196219	0.018331
0.0746	0.0392133	-0.0194629	0.0184323
0.0748	0.0392342	-0.0192454	0.0183373
0.075	0.0392603	-0.0195522	0.0183668
0.0752	0.0394588	-0.0192705	0.0183331
0.0754	0.039357	-0.0192677	0.0184407
0.0756	0.0392603	-0.0197028	0.0184998
0.0758	0.0393831	-0.0194685	0.0183162
0.076	0.0392473	-0.0194797	0.0183478
0.0762	0.0396678	-0.0196303	0.0184576
0.0764	0.0391741	-0.0193597	0.018485
0.0766	0.03937	-0.0194713	0.0183711
0.0768	0.0394066	-0.0196191	0.0183605
0.077	0.0392891	-0.0193513	0.0183436
0.0772	0.0396652	-0.0195438	0.0184027
0.0774	0.0394118	-0.0196777	0.0183584
0.0776	0.0394301	-0.019343	0.0183521
0.0778	0.0390906	-0.0193095	0.0183563
0.078	0.039673	-0.0196609	0.0183267
0.0782	0.0394693	-0.0192872	0.0182149
0.0784	0.0393256	-0.019184	0.0185567
0.0786	0.0388085	-0.0193737	0.0184259
0.0788	0.0392629	-0.01929	0.0184871
0.079	0.0395868	-0.0193095	0.0184449
0.0792	0.0392081	-0.0196163	0.0183078
0.0794	0.0396182	-0.0193207	0.0183753
0.0796	0.0397696	-0.0193011	0.0183985
0.0798	0.0394197	-0.0193764	0.0182888
0.08	0.0396338	-0.0194294	0.0184048
0.0802	0.0396495	-0.0194852	0.018293
0.0804	0.0394118	-0.0191143	0.0184217
0.0806	0.0395764	-0.0195884	0.0184555
0.0808	0.0392917	-0.0195271	0.0182824
0.081	0.0394771	-0.0193653	0.0184449
0.0812	0.0394615	-0.0194155	0.0183985
0.0814	0.0394902	-0.0194434	0.0183879
0.0816	0.0394615	-0.0193681	0.0184154
0.0818	0.0394406	-0.0193095	0.0183563
0.082	0.0390697	-0.0193346	0.0184112
0.0822	0.0393491	-0.0190613	0.0183521
0.0824	0.0393674	-0.0194462	0.0183478
0.0826	0.0389077	-0.0191896	0.0184618
0.0828	0.0388399	-0.0192788	0.0183964
0.083	0.0394562	-0.0193625	0.018331
0.0832	0.0392603	-0.0193513	0.0182972
0.0834	0.0391715	-0.0191756	0.0183879
0.0836	0.0392238	-0.0195717	0.0183732
0.0838	0.0390044	-0.0195856	0.0183014
0.084	0.0390775	-0.0191756	0.0183774
0.0842	0.0390383	-0.019555	0.0182782
0.0844	0.0394406	-0.0192175	0.0182635
0.0846	0.0390671	-0.0192649	0.0183689
0.0848	0.0396129	-0.0196247	0.0182023
0.085	0.0390566	-0.019039	0.0182993
0.0852	0.0389391	-0.0195773	0.01835
0.0854	0.0389652	-0.0192928	0.0183689
0.0856	0.0387719	-0.0193402	0.0183478
0.0858	0.0392264	-0.0193318	0.0182508
0.086	0.0386884	-0.0193764	0.0182297
0.0862	0.0387876	-0.019184	0.0182824
0.0864	0.0387798	-0.0193764	0.0181559
0.0866	0.0388007	-0.0193318	0.018236
0.0868	0.0388425	-0.0192063	0.0184386
0.087	0.0391637	-0.0193458	0.0182867
0.0872	0.039276	-0.0193179	0.0183014
0.0874	0.039276	-0.0191282	0.0184259
0.0876	0.0394275	-0.0193904	0.0183162
0.0878	0.03896	-0.0193039	0.0183542
0.088	0.0390305	-0.0191728	0.018217
0.0882	0.0391193	-0.0192509	0.0181812
0.0884	0.0392264	-0.0194741	0.0183711
0.0886	0.0392943	-0.019223	0.0182466
0.0888	0.0391376	-0.0193486	0.0183415
0.089	0.0396103	-0.0193318	0.0183056
0.0892	0.0394823	-0.0193569	0.0182213
0.0894	0.039848	-0.0194155	0.0181833
0.0896	0.0395189	-0.0192147	0.0183225
0.0898	0.0395267	-0.0194992	0.0181664
0.09	0.0398898	-0.0191673	0.0182381
0.0902	0.0393178	-0.0193597	0.0183141
0.0904	0.039485	-0.0193709	0.0182529
0.0906	0.0396025	-0.0192816	0.0182255
0.0908	0.0395816	-0.0190166	0.018312
0.091	0.0396599	-0.019541	0.0182318
0.0912	0.0395503	-0.0195382	0.0182002
0.0914	0.0395973	-0.0194016	0.0182297
0.0916	0.0397696	-0.0193541	0.0182149
0.0918	0.039054	-0.0193988	0.0182339
0.092	0.03931	-0.019329	0.0182044
0.0922	0.0396573	-0.0195438	0.0182424
0.0924	0.0394432	-0.0193709	0.0182846
0.0926	0.0393909	-0.0192063	0.018312
0.0928	0.0396756	-0.0194964	0.0181664
0.093	0.0392499	-0.0196303	0.0182381
0.0932	0.039545	-0.0194127	0.0183246
0.0934	0.0399916	-0.0196247	0.0180925
0.0936	0.0393805	-0.0191199	0.0182867
0.0938	0.0397409	-0.0192621	0.0183056
0.094	0.0398454	-0.0193067	0.0181073
0.0942	0.0394536	-0.0194155	0.0182571
0.0944	0.0397043	-0.019223	0.0182635
0.0946	0.03972	-0.0194071	0.0183246
0.0948	0.0395607	-0.0191254	0.0184048
0.095	0.0396051	-0.0192816	0.0183352
0.0952	0.0397487	-0.0193262	0.0184027
0.0954	0.0393909	-0.0191422	0.0183099
0.0956	0.0396521	-0.0193904	0.0183521
0.0958	0.0394797	-0.0194546	0.0183795
0.096	0.0396808	-0.019223	0.018312
0.0962	0.039498	-0.0195801	0.0182782
0.0964	0.0400334	-0.0191784	0.0184913
0.0966	0.0397043	-0.0191896	0.0183457
0.0968	0.0398375	-0.0195801	0.0182656
0.097	0.0394379	-0.0191282	0.0183225
0.0972	0.0394693	-0.0192956	0.018293
0.0974	0.0394719	-0.0195745	0.0183373
0.0976	0.0391141	-0.0191784	0.018428
0.0978	0.0393831	-0.0189943	0.0182888
0.098	0.0393831	-0.019382	0.0182318
0.0982	0.0393047	-0.0190194	0.0182508
0.0984	0.0394066	-0.0191952	0.0183753
0.0986	0.0389809	-0.0193792	0.0183183
0.0988	0.0392238	-0.0192621	0.0184175
0.099	0.0392081	-0.019184	0.018447
0.0992	0.0388503	-0.0193681	0.0184133
0.0994	0.0391428	-0.0189609	0.0183183
0.0996	0.0393909	-0.019131	0.0184323
0.0998	0.039088	-0.0192509	0.01835
0.1	0.0398245		0.0222744
0.1002	0.0385604		0.053267
0.1004	0.0296803	-0.0102809	0.0494945
0.1006	0.0248119	-0.0240595	0.037046
0.1008	0.0231613	-0.0263187	0.0295557
0.101	0.0234016	-0.026196	0.0257959
0.1012	0.0239318	-0.0261291	0.0237197
0.1014	0.0242452	-0.0256409	0.0230255
0.1016	0.0248511	-0.0254541	0.0225993
0.1018	0.0257548	-0.024966	0.0227006
0.102	0.0259324	-0.025111	0.0225318
0.1022	0.026682	-0.0250022	0.0226331
0.1024	0.0268256	-0.0245281	0.0227154
0.1026	0.0271991	-0.0246619	0.0228103
0.1028	0.0275204	-0.0242519	0.0228293
0.103	0.028108	-0.0242017	0.0228989
0.1032	0.0280767	-0.024026	0.0231268
0.1034	0.0288576	-0.0240232	0.0231711
0.1036	0.0285364	-0.0242826	0.0233716
0.1038	0.028505	-0.0239563	0.0234602
0.104	0.0294296	-0.0237276	0.0235277
0.1042	0.0292755	-0.0238782	0.0236627
0.1044	0.0297091	-0.0235574	0.0235636
0.1046	0.0296673	-0.0237053	0.0237176
0.1048	0.030106	-0.023457	0.023994
0.105	0.0303542	-0.0232841	0.0240003
0.1052	0.0305239	-0.0232757	0.0238948
0.1054	0.0312369	-0.0234291	0.024167
0.1056	0.0317045	-0.0229829	0.0241754
0.1058	0.0322555	-0.0232283	0.0242176
0.106	0.0322373	-0.0230135	0.0243126
0.1062	0.0324305	-0.0228267	0.0243843
0.1064	0.0323783	-0.0231837	0.0243569
0.1066	0.0323626	-0.022796	0.024416
0.1068	0.03312	-0.0226872	0.0246755
0.107	0.0335196	-0.0228992	0.0246903
0.1072	0.0336476	-0.022584	0.0247367
0.1074	0.0338775	-0.022598	0.0248907
0.1076	0.0340342	-0.0226231	0.0250553
0.1078	0.0339114	-0.0226147	0.0251165
0.108	0.0339349	-0.0224278	0.0252578
0.1082	0.0342431	-0.0224195	0.0251734
0.1084	0.0345487	-0.0226063	0.0251397
0.1086	0.0350658	-0.0222493	0.025241
0.1088	0.0350058	-0.0225199	0.0253422
0.109	0.0353113	-0.0223888	0.0255026
0.1092	0.035912	-0.0224027	0.0254498
0.1094	0.0358938	-0.0222214	0.0253802
0.1096	0.0354837	-0.0221015	0.0254119
0.1098	0.0360792	-0.0222828	0.0254984
0.11	0.0365101	-0.0219592	0.025473
0.1102	0.0369385	-0.0221154	0.0255659
0.1104	0.0372179	-0.0223302	0.025606
0.1106	0.0370821	-0.0220039	0.025568
0.1108	0.0372075	-0.0219564	0.0259541
0.111	0.0373459	-0.0221405	0.0258781
0.1112	0.0369907	-0.0219509	0.0260976
0.1114	0.0372284	-0.0218979	0.0260237
0.1116	0.0371788	-0.021976	0.0260891
0.1118	0.0368627	-0.0219537	0.0260491
0.112	0.0372963	-0.0219509	0.0262221
0.1122	0.0369933	-0.0220011	0.0260512
0.1124	0.0372232	-0.0218923	0.0261334
0.1126	0.0379362	-0.021697	0.0263529
0.1128	0.0380929	-0.0219927	0.0262643
0.113	0.0379623	-0.0218895	0.0262664
0.1132	0.0380694	-0.0217919	0.0263001
0.1134	0.0376698	-0.0219369	0.0262347
0.1136	0.0376123	-0.021513	0.0263318
0.1138	0.0376437	-0.0216943	0.0263782
0.114	0.0374008	-0.0218895	0.0263803
0.1142	0.0375522	-0.0217556	0.0265006
0.1144	0.0377925	-0.0216664	0.0265048
0.1146	0.037628	-0.0217696	0.0265976
0.1148	0.0382313	-0.0213986	0.0266673
0.115	0.0382705	-0.0217194	0.0265618
0.1152	0.0380354	-0.0216803	0.0266335
0.1154	0.0385865	-0.0215994	0.0266272
0.1156	0.0384063	-0.0216134	0.0265449
0.1158	0.0381529	-0.0217724	0.0267833
0.116	0.0386466	-0.0213791	0.0267939
0.1162	0.0389339	-0.0215158	0.0269563
0.1164	0.039054	-0.0216022	0.0269141
0.1166	0.0391872	-0.0214237	0.0268909
0.1168	0.0388294	-0.0215213	0.0268508
0.117	0.0387745	-0.0214962	0.026912
0.1172	0.0389887	-0.0212675	0.0270154
0.1174	0.0389678	-0.0214879	0.0270534
0.1176	0.0391741	-0.0214711	0.0271652
0.1178	0.0395503	-0.0212117	0.0270154
0.118	0.0396208	-0.0214293	0.0272855
0.1182	0.0392421	-0.02146	0.0270217
0.1184	0.0396103	-0.0211532	0.0272391
0.1186	0.0397487	-0.0213958	0.027296
0.1188	0.0402842	-0.0212954	0.0272032
0.119	0.0405323	-0.0210583	0.0274585
0.1192	0.0405349	-0.0213568	0.0272369
0.1194	0.0400308	-0.0213121	0.0273002
0.1196	0.0394693	-0.0210723	0.0274416
0.1198	0.0394432	-0.0212759	0.0271631
0.12	0.0399551	-0.0209747	0.0274163
0.1202	0.0400256	-0.0209858	0.0273509
0.1204	0.040211	-0.0210388	0.0273108
0.1206	0.0405976	-0.0208324	0.0274226
0.1208	0.0402319	-0.0210974	0.0274458
0.121	0.0409658	-0.021181	0.0273192
0.1212	0.0410181	-0.0206874	0.0275239
0.1214	0.04042	-0.0210388	0.0274184
0.1216	0.0406289	-0.020785	0.0273382
0.1218	0.0406263	-0.020679	0.0273783
0.122	0.0408509	-0.0210388	0.0275576
0.1222	0.0413263	-0.020718	0.0275408
0.1224	0.0413811	-0.0208436	0.0273994
0.1226	0.0414281	-0.020732	0.027545
0.1228	0.0418721	-0.0208296	0.0275197
0.123	0.0420184	-0.0205061	0.0274184
0.1232	0.0420393	-0.0208798	0.0273699
0.1234	0.0423579	-0.0206372	0.0273045
0.1236	0.0423658	-0.0209914	0.027372
0.1238	0.0420941	-0.0210695	0.0274332
0.124	0.042209	-0.0208045	0.027526
0.1242	0.0419113	-0.0209328	0.0275809
0.1244	0.0420158	-0.0208436	0.0274205
0.1246	0.0420367	-0.0205842	0.0275049
0.1248	0.0430056	-0.0208882	0.0274859
0.125	0.0428176	-0.0208603	0.0274733
0.1252	0.0433504	-0.0204865	0.0275703
0.1254	0.043037	-0.0207906	0.0274986
0.1256	0.0431545	-0.0204614	0.0276484
0.1258	0.0430918	-0.0206344	0.0274711
0.126	0.0430422	-0.0205116	0.0275049
0.1262	0.043212	-0.0203053	0.0276209
0.1264	0.0433608	-0.0206539	0.0276104
0.1266	0.0435071	-0.020361	0.027642
0.1268	0.0436769	-0.02064	0.0277876
0.127	0.0437422	-0.020573	0.027623
0.1272	0.0429221	-0.0202578	0.0277412
0.1274	0.0433608	-0.0204085	0.0277075
0.1276	0.0436716	-0.0203331	0.0275281
0.1278	0.0433452	-0.0206874	0.0277518
0.128	0.0433295	-0.0202299	0.027737
0.1282	0.0440634	-0.0204224	0.0276927
0.1284	0.0440504	-0.0205367	0.027756
0.1286	0.0443037	-0.0202048	0.0279205
0.1288	0.0435254	-0.0204614	0.0278404
0.129	0.0436246	-0.020269	0.0278762
0.1292	0.0435384	-0.0203108	0.027834
0.1294	0.0439198	-0.020255	0.0279353
0.1296	0.0438179	-0.0203555	0.027948
0.1298	0.0437709	-0.0202467	0.027853
0.13	0.043831	-0.0203304	0.027794
0.1302	0.0439589	-0.0199901	0.0278762
0.1304	0.043972	-0.020361	0.0278214
0.1306	0.0432877	-0.0201769	0.0277961
0.1308	0.0435384	-0.0198534	0.0279016
0.131	0.0437631	-0.0202467	0.0278298
0.1312	0.043481	-0.0203025	0.0278573
0.1314	0.0437761	-0.0200486	0.0280661
0.1316	0.0437422	-0.0202746	0.0278383
0.1318	0.0434496	-0.0201714	0.0278868
0.132	0.0439485	-0.0202355	0.028005
0.1322	0.0440112	-0.0204029	0.0278994
0.1324	0.0436377	-0.0201937	0.0280999
0.1326	0.0440504	-0.019965	0.0280556
0.1328	0.0439276	-0.0203248	0.0279712
0.133	0.0434862	-0.0202467	0.028102
0.1332	0.0440033	-0.0201016	0.0282117
0.1334	0.0438466	-0.0203331	0.028045
0.1336	0.0437631	-0.0199371	0.0281906
0.1338	0.0438571	-0.0197669	0.0282624
0.134	0.04375	-0.0202634	0.0281991
0.1342	0.0433791	-0.020018	0.0285451
0.1344	0.0441548	-0.0199203	0.0284544
0.1346	0.0441444	-0.0200319	0.0284417
0.1348	0.0441914	-0.0199343	0.0283721
0.135	0.0439589	-0.0198646	0.0284902
0.1352	0.0437396	-0.0201435	0.028275
0.1354	0.0434993	-0.0200905	0.0283214
0.1356	0.0436116	-0.0197669	0.0282223
0.1358	0.0435437	-0.0201518	0.0283742
0.136	0.0439015	-0.0200347	0.028429
0.1362	0.0441836	-0.0198701	0.0285345
0.1364	0.0442358	-0.0200068	0.0283805
0.1366	0.0437526	-0.0199845	0.0284143
0.1368	0.0441444	-0.0198255	0.0283067
0.137	0.0438257	-0.0201267	0.0284058
0.1372	0.0445257	-0.019845	0.0285134
0.1374	0.0445231	-0.0199873	0.0284206
0.1376	0.044463	-0.0202188	0.0285599
0.1378	0.0449906	-0.0198952	0.0284459
0.138	0.0445649	-0.0198952	0.0285493
0.1382	0.0450063	-0.0202244	0.0285683
0.1384	0.0448574	-0.019859	0.0285767
0.1386	0.0446432	-0.0199064	0.0283278
0.1388	0.0445179	-0.0202522	0.0285472
0.139	0.0445623	-0.0198952	0.0284311
0.1392	0.0444082	-0.0197753	0.0286063
0.1394	0.0449802	-0.0200961	0.028486
0.1396	0.0449593	-0.0196637	0.0286316
0.1398	0.0451943	-0.0198227	0.0286084
0.14	0.0454973	-0.0199203	0.0286696
0.1402	0.0450193	-0.0197614	0.0286295
0.1404	0.0452309	-0.0198701	0.0287666
0.1406	0.0456488	-0.0197558	0.0286843
0.1408	0.0451107	-0.0198785	0.0286548
0.141	0.0455156	-0.019753	0.0287455
0.1412	0.0450507	-0.0198478	0.0288995
0.1414	0.045069	-0.0196303	0.0287434
0.1416	0.0449175	-0.019739	0.0287898
0.1418	0.0450951	-0.0198395	0.0288721
0.142	0.0455103	-0.0196609	0.0287983
0.1422	0.0452335	-0.019898	0.0287835
0.1424	0.0453641	-0.0195494	0.0287519
0.1426	0.0445596	-0.0198116	0.0288109
0.1428	0.045351	-0.0196163	0.0288152
0.143	0.0451813	-0.0194741	0.0287772
0.1432	0.0453536	-0.0196916	0.0287877
0.1434	0.0458055	-0.0196163	0.0288299
0.1436	0.0459282	-0.0197558	0.0288109
0.1438	0.0460327	-0.0199482	0.0288679
0.144	0.0461659	-0.0195801	0.0288426
0.1442	0.0464584	-0.0195884	0.0287139
0.1444	0.0467666	-0.019594	0.0287244
0.1446	0.0465603	-0.0195299	0.0287941
0.1448	0.0466857	-0.0196888	0.028754
0.145	0.0467039	-0.0196414	0.0287709
0.1452	0.0466125	-0.019488	0.0287519
0.1454	0.0464558	-0.0197363	0.0287329
0.1456	0.0468189	-0.0196052	0.0288911
0.1458	0.0466256	-0.0194741	0.0287329
0.146	0.0463801	-0.0195494	0.0288953
0.1462	0.0465524	-0.0195605	0.0289924
0.1464	0.0461737	-0.0196442	0.0288088
0.1466	0.046051	-0.0197642	0.029024
0.1468	0.0460693	-0.0194434	0.0291148
0.147	0.0460118	-0.0195103	0.0290831
0.1472	0.0461346	-0.0195326	0.0289544
0.1474	0.0457141	-0.0193541	0.0289312
0.1476	0.0455547	-0.0195522	0.0289966
0.1478	0.0457167	-0.0196079	0.0289185
0.148	0.0452779	-0.0197279	0.0289101
0.1482	0.0449436	-0.0195801	0.0289333
0.1484	0.0450481	-0.0196833	0.0290367
0.1486	0.0453641	-0.0193486	0.0289882
0.1488	0.0448652	-0.0196442	0.0289671
0.149	0.0452257	-0.0196554	0.0290325
0.1492	0.0456096	-0.0194518	0.0290135
0.1494	0.0456174	-0.0195773	0.0290114
0.1496	0.0457036	-0.0196247	0.0290662
0.1498	0.0456253	-0.0194936	0.0290473
0.15	0.0454659	-0.0195048	0.0288637
0.1502	0.0455965	-0.0194741	0.0290789
0.1504	0.0455913	-0.0194546	0.0289671
0.1506	0.0458682	-0.0195773	0.028965
0.1508	0.0459387	-0.0193625	0.029081
0.151	0.0456984	-0.019541	0.0289143
0.1512	0.0460771	-0.0195828	0.0289143
0.1514	0.0461372	-0.0192788	0.0290916
0.1516	0.0460379	-0.0194071	0.0290114
0.1518	0.0457689	-0.019488	0.0290304
0.152	0.0464741	-0.0194239	0.029119
0.1522	0.0460301	-0.0194769	0.0290683
0.1524	0.0456958	-0.0196079	0.0293215
0.1526	0.0461319	-0.0193207	0.0292836
0.1528	0.0461946	-0.0195968	0.0291232
0.153	0.046589	-0.0193513	0.0292287
0.1532	0.0463409	-0.0194099	0.029081
0.1534	0.0459674	-0.0194127	0.0289861
0.1536	0.0463539	-0.0192398	0.0292097
0.1538	0.0467457	-0.0190864	0.0291633
0.154	0.04632	-0.0194099	0.0291633
0.1542	0.0460249	-0.0193039	0.0293152
0.1544	0.0470147	-0.019223	0.0292224
0.1546	0.0468032	-0.0195243	0.0292393
0.1548	0.0466961	-0.0192677	0.0293469
0.155	0.0468189	-0.0191756	0.0292646
0.1552	0.0466282	-0.0193039	0.0294312
0.1554	0.0468998	-0.0191059	0.0291654
0.1556	0.0465237	-0.0192649	0.0291759
0.1558	0.0465472	-0.0193597	0.0293743
0.156	0.0469181	-0.0192063	0.0292899
0.1562	0.0473046	-0.0195689	0.0294186
0.1564	0.0471427	-0.0193932	0.0294692
0.1566	0.0473229	-0.0191366	0.0292688
0.1568	0.0470539	-0.0195661	0.0292329
0.157	0.0473125	-0.0191171	0.0294101
0.1572	0.0479524	-0.0191561	0.0292371
0.1574	0.0478192	-0.0194211	0.0292139
0.1576	0.0479602	-0.0191059	0.0292941
0.1578	0.0479315	-0.0191254	0.0292751
0.158	0.0471532	-0.019329	0.0293152
0.1582	0.0475632	-0.0192342	0.0292983
0.1584	0.0468241	-0.0191728	0.0291633
0.1586	0.0466909	-0.0193569	0.0291738
0.1588	0.0470748	-0.0190278	0.0294418
0.159	0.0472498	-0.0191701	0.0291464
0.1592	0.0473073	-0.0193346	0.029368
0.1594	0.0473673	-0.0192426	0.0293258
0.1596	0.0473308	-0.0189664	0.0293047
0.1598	0.0470643	-0.0193095	0.0293848
0.16	0.0473334	-0.0191728	0.0293574
0.1602	0.0470487	-0.0192203	0.0293785
0.1604	0.0469233	-0.0193235	0.0294291
0.1606	0.0472446	-0.0191031	0.0295135
0.1608	0.0473203	-0.0193318	0.0294439
0.161	0.0475945	-0.0189636	0.02956
0.1612	0.0476833	-0.0189971	0.0296507
0.1614	0.0476651	-0.0192258	0.0295157
0.1616	0.0473725	-0.0189664	0.0294376
0.1618	0.0469729	-0.019184	0.029638
0.162	0.0471636	-0.0190139	0.0293848
0.1622	0.0473621	-0.0188995	0.0294967
0.1624	0.0474666	-0.0191701	0.0294207
0.1626	0.0472132	-0.0191115	0.0294692
0.1628	0.0467039	-0.018986	0.0293764
0.163	0.0466465	-0.0188883	0.0293553
0.1632	0.0458473	-0.0190027	0.0294481
0.1634	0.0460693	-0.0188158	0.029446
0.1636	0.0461999	-0.0192426	0.029503
0.1638	0.0464584	-0.0191115	0.029408
0.164	0.0469285	-0.0190613	0.0293975
0.1642	0.0463278	-0.0192454	0.0294249
0.1644	0.0461372	-0.0189051	0.0294671
0.1646	0.0459961	-0.0190306	0.0293616
0.1648	0.0462599	-0.0192091	0.029311
0.165	0.0463043	-0.018972	0.0293701
0.1652	0.046179	-0.018972	0.0292329
0.1654	0.0459152	-0.0190055	0.02933
0.1656	0.0462547	-0.018721	0.0294819
0.1658	0.0464062	-0.019184	0.0293785
0.166	0.0465237	-0.0190278	0.0293426
0.1662	0.0468789	-0.0187963	0.0292941
0.1664	0.0467274	-0.0191003	0.0293532
0.1666	0.0467979	-0.0189915	0.029349
0.1668	0.0468815	-0.0187572	0.0294376
0.167	0.0466778	-0.0191003	0.0292688
0.1672	0.0463095	-0.0187823	0.0292815
0.1674	0.0470095	-0.018721	0.029197
0.1676	0.0465211	-0.0189497	0.0291823
0.1678	0.0467274	-0.0190334	0.0291612
0.168	0.0469442	-0.0190027	0.0294038
0.1682	0.0463122	-0.0188158	0.0291633
0.1684	0.0470696	-0.0189943	0.0292941
0.1686	0.0474169	-0.0187294	0.0293173
0.1688	0.0468633	-0.0189776	0.0291548
0.169	0.0468293	-0.0190222	0.0294017
0.1692	0.0469991	-0.0188298	0.0293722
0.1694	0.0467588	-0.0189469	0.0294165
0.1696	0.0469651	-0.0189664	0.0296422
0.1698	0.0473125	-0.0186011	0.0294587
0.17	0.0471244	-0.0189915	0.0293785
0.1702	0.0475397	-0.0186931	0.0294967
0.1704	0.0476024	-0.0189134	0.0294123
0.1706	0.0475554	-0.0187098	0.0293004
0.1708	0.0477225	-0.0186764	0.0294228
0.171	0.0479602	-0.0185983	0.0293026
0.1712	0.0477721	-0.0189302	0.0293722
0.1714	0.0479497	-0.0186819	0.0294017
0.1716	0.0479106	-0.0185815	0.0293447
0.1718	0.0478165	-0.0189218	0.0292477
0.172	0.0477695	-0.0187572	0.0293722
0.1722	0.0480359	-0.0186513	0.0292857
0.1724	0.0479733	-0.0189441	0.0292772
0.1726	0.0483676	-0.0188521	0.0291802
0.1728	0.0485296	-0.0186652	0.029311
0.173	0.0478818	-0.0190947	0.0293321
0.1732	0.04813	-0.018866	0.0293996
0.1734	0.0482005	-0.0187294	0.0292625
0.1736	0.0481926	-0.0186485	0.0292815
0.1738	0.0487516	-0.0184728	0.029389
0.174	0.048796	-0.0186736	0.0293532
0.1742	0.0486837	-0.018654	0.0293532
0.1744	0.0489605	-0.0186485	0.0294439
0.1746	0.0486497	-0.0186234	0.0294819
0.1748	0.0490389	-0.018707	0.0295768
0.175	0.0493784	-0.0184058	0.029292
0.1752	0.0490728	-0.0188911	0.0291781
0.1754	0.0493	-0.0187321	0.0294819
0.1756	0.0492635	-0.01847	0.0293637
0.1758	0.0491277	-0.0188075	0.0293258
0.176	0.0492818	-0.0187545	0.0293405
0.1762	0.0490232	-0.0185369	0.0293658
0.1764	0.0489866	-0.0188019	0.0295346
0.1766	0.0492374	-0.0186485	0.0292139
0.1768	0.0488926	-0.018654	0.0292266
0.177	0.0488691	-0.0188632	0.0293975
0.1772	0.0487934	-0.0185258	0.0294312
0.1774	0.0485844	-0.018654	0.0294988
0.1776	0.0491486	-0.018813	0.0295557
0.1778	0.0491721	-0.0186373	0.0294249
0.178	0.0490937	-0.0186875	0.0294988
0.1782	0.0489814	-0.0187768	0.0294017
0.1784	0.0488195	-0.0186959	0.0292772
0.1786	0.0486393	-0.0184755	0.0294376
0.1788	0.0485087	-0.0187154	0.0292055
0.179	0.0482762	-0.0185955	0.0292772
0.1792	0.0487934	-0.0188521	0.0293426
0.1794	0.0489109	-0.0186373	0.0294038
0.1796	0.0482867	-0.018403	0.0294186
0.1798	0.0487516	-0.0188298	0.0295178
0.18	0.0485661	-0.0185453	0.0293764
0.1802	0.0487855	-0.0186652	0.0293236
0.1804	0.0492086	-0.0187517	0.0294334
0.1806	0.0489762	-0.0184142	0.0294756
0.1808	0.0486419	-0.0187266	0.0294924
0.181	0.048971	-0.0187126	0.0293469
0.1812	0.048796	-0.0184923	0.0294545
0.1814	0.0489318	-0.0186234	0.0294101
0.1816	0.0492765	-0.0187126	0.0293975
0.1818	0.0490963	-0.0183138	0.0294144
0.182	0.0491172	-0.0186094	0.0292793
0.1822	0.0489109	-0.0184755	0.0293764
0.1824	0.048856	-0.01847	0.0293912
0.1826	0.0485505	-0.0186317	0.0295114
0.1828	0.0484225	-0.0185732	0.0294144
0.183	0.0484643	-0.0184253	0.029427
0.1832	0.0484982	-0.0185648	0.0294882
0.1834	0.0488508	-0.0184839	0.0294228
0.1836	0.0484538	-0.018668	0.029389
0.1838	0.0487019	-0.0187349	0.0294587
0.184	0.0484852	-0.0183026	0.0294777
0.1842	0.0484381	-0.0186345	0.0295114
0.1844	0.0487934	-0.0184225	0.0294101
0.1846	0.0480255	-0.0185285	0.0294777
0.1848	0.0481169	-0.0186094	0.0296338
0.185	0.0479628	-0.0183361	0.0295958
0.1852	0.0480412	-0.0184393	0.0295199
0.1854	0.0483546	-0.0183668	0.0295515
0.1856	0.049206	-0.0182608	0.0295811
0.1858	0.0490493	-0.0185258	0.0296043
0.186	0.0488012	-0.0183082	0.0296211
0.1862	0.0495273	-0.0183863	0.0292625
0.1864	0.048796	-0.0186066	0.0293827
0.1866	0.0490493	-0.0183556	0.0293131
0.1868	0.0493105	-0.0184198	0.0294481
0.187	0.0494776	-0.0184895	0.0294059
0.1872	0.0498694	-0.018364	0.0294988
0.1874	0.0499321	-0.0183668	0.0293806
0.1876	0.0502742	-0.0184588	0.029408
0.1878	0.0504806	-0.0186262	0.0295262
0.188	0.0500131	-0.0185369	0.0292793
0.1882	0.0500052	-0.0183891	0.0295009
0.1884	0.0504962	-0.0186289	0.0295536
0.1886	0.0503813	-0.0182552	0.0293447
0.1888	0.0498825	-0.0184532	0.0294608
0.189	0.0501698	-0.0184449	0.0295832
0.1892	0.0506764	-0.0184532	0.0294608
0.1894	0.0502821	-0.0184811	0.0295874
0.1896	0.0506164	-0.0184309	0.0294481
0.1898	0.0504362	-0.0184728	0.0294101
0.19	0.0506712	-0.0184895	0.0294903
0.1902	0.050585	-0.0183723	0.0293912
0.1904	0.0499791	-0.0185871	0.0293131
0.1906	0.0503291	-0.0186066	0.0293701
0.1908	0.0502951	-0.0181604	0.0292899
0.191	0.0498877	-0.0186429	0.0294123
0.1912	0.0504127	-0.0184839	0.0294228
0.1914	0.0501933	-0.0184811	0.0293469
0.1916	0.0498172	-0.0187545	0.0293869
0.1918	0.0498302	-0.0184951	0.0294186
0.192	0.0496918	-0.0184532	0.0293933
0.1922	0.0496396	-0.0186819	0.0293258
0.1924	0.0494724	-0.0185425	0.0293258
0.1926	0.0499922	-0.018615	0.0294291
0.1928	0.0493209	-0.0186178	0.0293384
0.193	0.0496474	-0.0185732	0.02956
0.1932	0.0494881	-0.0186345	0.0294671
0.1934	0.0492713	-0.0185564	0.0295114
0.1936	0.0494045	-0.0181492	0.0295389
0.1938	0.0492765	-0.0184365	0.0293511
0.194	0.0486184	-0.0183472	0.0295009
0.1942	0.0490075	-0.0182329	0.0295705
0.1944	0.0493497	-0.0184811	0.0295157
0.1946	0.0493836	-0.0183891	0.0294523
0.1948	0.0497493	-0.0182468	0.0296211
0.195	0.049697	-0.0186624	0.0295009
0.1952	0.0498929	-0.0183138	0.0295916
0.1954	0.0500366	-0.0182664	0.0294523
0.1956	0.0497858	-0.0186066	0.0295072
0.1958	0.0498799	-0.0181213	0.0296422
0.196	0.0498903	-0.0184058	0.0295916
0.1962	0.0499478	-0.0185285	0.0296422
0.1964	0.0498746	-0.0182357	0.029714
0.1966	0.0501985	-0.0184616	0.0296296
0.1968	0.0498302	-0.0184923	0.0296254
0.197	0.0502011	-0.0182162	0.0297161
0.1972	0.0499896	-0.0183807	0.029522
0.1974	0.0500888	-0.0184895	0.0297245
0.1976	0.0504962	-0.0181604	0.0295431
0.1978	0.050188	-0.0183528	0.029522
0.198	0.0501567	-0.0184365	0.0298638
0.1982	0.0499112	-0.0182162	0.0295726
0.1984	0.0498485	-0.0183863	0.0296908
0.1986	0.0501645	-0.0184588	0.0297245
0.1988	0.0504257	-0.0182162	0.0295283
0.199	0.050619	-0.0185843	0.0296275
0.1992	0.0509115	-0.0184979	0.0295579
0.1994	0.0503317	-0.0181687	0.029446
0.1996	0.050188	-0.0184058	0.029503
0.1998	0.050222	-0.0183166	0.0294291
0.2	0.0499713	-0.0182413	0.0295009
0.2002	0.050141	-0.0183974	0.0296908
0.2004	0.0499295	-0.0181799	0.0296254
0.2006	0.0495351	-0.0183863	0.0297076
0.2008	0.0504623	-0.0183389	0.0295346
0.201	0.0503892	-0.018297	0.0294988
0.2012	0.0502768	-0.0181604	0.0296676
0.2014	0.0509011	-0.0183054	0.029638
0.2016	0.0505798	-0.0181548	0.0295241
0.2018	0.0503944	-0.0182217	0.0295726
0.202	0.050491	-0.01847	0.0292604
0.2022	0.0503134	-0.0181157	0.0292667
0.2024	0.0504283	-0.0183194	0.0293658
0.2026	0.05035	-0.0183361	0.0294545
0.2028	0.0508828	-0.0181576	0.0293236
0.203	0.0505668	-0.0180934	0.0293848
0.2032	0.0504884	-0.0181771	0.0295009
0.2034	0.0508253	-0.0179986	0.0293405
0.2036	0.0504884	-0.0184755	0.0294291
0.2038	0.0506242	-0.0183779	0.0293975
0.204	0.0504675	-0.0180042	0.0294312
0.2042	0.0504466	-0.0183221	0.0295705
0.2044	0.0502925	-0.0180851	0.0293089
0.2046	0.050188	-0.0182301	0.0293933
0.2048	0.0502246	-0.0182022	0.0295199
0.205	0.0501228	-0.0179093	0.0292414
0.2052	0.050269	-0.0182719	0.0294312
0.2054	0.0503656	-0.0182831	0.0294819
0.2056	0.0506007	-0.0180795	0.0293215
0.2058	0.0498929	-0.0184532	0.0293047
0.206	0.0496761	-0.0180767	0.0293152
0.2062	0.0500522	-0.0179317	0.0291232
0.2064	0.0499608	-0.0184086	0.0292034
0.2066	0.0501619	-0.0180153	0.0293827
0.2068	0.050222	-0.0181464	0.0293806
0.207	0.0500575	-0.0182719	0.0294692
0.2072	0.0501384	-0.0179986	0.0295178
0.2074	0.0496161	-0.0181353	0.0292962
0.2076	0.0496108	-0.0182385	0.0293047
0.2078	0.0498537	-0.0182022	0.0294165
0.208	0.0494724	-0.0180683	0.0293279
0.2082	0.0497754	-0.0180098	0.0294439
0.2084	0.0501933	-0.0182887	0.0294608
0.2086	0.0504727	-0.0180376	0.0294186
0.2088	0.0503578	-0.0181743	0.0293848
0.209	0.0506033	-0.0182022	0.0294439
0.2092	0.0502455	-0.0180627	0.0294291
0.2094	0.0502455	-0.0181799	0.0296296
0.2096	0.0505694	-0.0178452	0.0295009
0.2098	0.0501045	-0.0182357	0.0295072
0.21	0.0501619	-0.0180795	0.0295051
0.2102	0.0503239	-0.018099	0.0294819
0.2104	0.0497649	-0.0182691	0.029465
0.2106	0.0503683	-0.0180767	0.0295093
0.2108	0.0503186	-0.017993	0.0294988
0.211	0.050034	-0.0182524	0.0296127
0.2112	0.050478	-0.017887	0.0295557
0.2114	0.0505772	-0.0182245	0.0294376
0.2116	0.0503735	-0.0180962	0.029465
0.2118	0.0503735	-0.0178508	0.0294566
0.212	0.0499086	-0.0183194	0.0293363
0.2122	0.050034	-0.0179874	0.0294481
0.2124	0.0502821	-0.0179093	0.0296148
0.2126	0.0500026	-0.0179205	0.0293827
0.2128	0.0500601	-0.0179958	0.0294882
0.213	0.050666	-0.0179066	0.0295114
0.2132	0.0507809	-0.0181074	0.0295093
0.2134	0.0503918	-0.0180962	0.0293616
0.2136	0.0504753	-0.0178787	0.0295621
0.2138	0.0500131	-0.0179986	0.0295135
0.214	0.050572	-0.0178089	0.0294798
0.2142	0.050632	-0.0178536	0.0297203
0.2144	0.0506347	-0.0179651	0.0295114
0.2146	0.0506059	-0.0178703	0.0297815
0.2148	0.0506947	-0.0177169	0.0296654
0.215	0.0507208	-0.0181799	0.0296043
0.2152	0.0510343	-0.0178284	0.0296823
0.2154	0.0510029	-0.0179038	0.0296676
0.2156	0.050888	-0.0179847	0.0296718
0.2158	0.0510656	-0.0178284	0.0296633
0.216	0.0509037	-0.0179372	0.0297266
0.2162	0.0510708	-0.0178898	0.0295789
0.2164	0.0509664	-0.017636	0.0298132
0.2166	0.0507078	-0.017887	0.029541
0.2168	0.0508306	-0.0180098	0.0294523
0.217	0.0510865	-0.017742	0.0295726
0.2172	0.0509977	-0.0180293	0.0296085
0.2174	0.0512432	-0.0179233	0.0296486
0.2176	0.0509716	-0.0177615	0.0297161
0.2178	0.0507626	-0.0180237	0.0297182
0.218	0.0503839	-0.0180153	0.0296718
0.2182	0.0506608	-0.0177643	0.0297731
0.2184	0.0503212	-0.0179289	0.0296127
0.2186	0.0497754	-0.0178424	0.0298153
0.2188	0.0502951	-0.0177448	0.0297309
0.219	0.050303	-0.0179372	0.0296254
0.2192	0.0506738	-0.0179847	0.0297372
0.2194	0.0509037	-0.0178145	0.0295979
0.2196	0.0512641	-0.0181046	0.0296823
0.2198	0.0515514	-0.0179651	0.0296127
0.22	0.0510578	-0.0177476	0.0296992
0.2202	0.0515122	-0.0180321	0.0297752
0.2204	0.0510865	-0.0177559	0.0297414
0.2206	0.051426	-0.0180823	0.0296254
0.2208	0.0508932	-0.0181576	0.0296422
0.221	0.0508384	-0.0181297	0.0296233
0.2212	0.0510108	-0.0178982	0.0296865
0.2214	0.0506556	-0.0182524	0.0297414
0.2216	0.0509742	-0.0178061	0.0295262
0.2218	0.0509298	-0.0180655	0.0297076
0.222	0.0509925	-0.0182636	0.0296676
0.2222	0.0513477	-0.0177476	0.0297414
0.2224	0.0504283	-0.0181074	0.0297477
0.2226	0.0505694	-0.0181297	0.0298406
0.2228	0.0509951	-0.0177504	0.0298912
0.223	0.0509115	-0.0181743	0.0298026
0.2232	0.0508253	-0.0178508	0.0297435
0.2234	0.0513607	-0.0180125	0.0297688
0.2236	0.0512719	-0.018311	0.0296633
0.2238	0.0511361	-0.0180934	0.0297688
0.224	0.0509115	-0.0181994	0.0297351
0.2242	0.0512981	-0.0182524	0.0296254
0.2244	0.0513268	-0.0180042	0.0298068
0.2246	0.0510447	-0.0181632	0.0295726
0.2248	0.051554	-0.0182217	0.0295789
0.225	0.0517212	-0.0179344	0.0297878
0.2252	0.0513999	-0.0182691	0.0297435
0.2254	0.0515592	-0.0181911	0.029695
0.2256	0.051238	-0.0179149	0.0296085
0.2258	0.0511831	-0.0182022	0.0295853
0.226	0.0508984	-0.0181074	0.0296718
0.2262	0.0509115	-0.0180488	0.029657
0.2264	0.0512981	-0.0182273	0.0296359
0.2266	0.0513346	-0.0179986	0.0297541
0.2268	0.0511962	-0.018099	0.0298132
0.227	0.0512484	-0.0182134	0.0296802
0.2272	0.0510552	-0.0179735	0.0297456
0.2274	0.0506216	-0.0181938	0.0295579
0.2276	0.0508906	-0.0181687	0.0297055
0.2278	0.0503552	-0.0183305	0.0298174
0.228	0.050444	-0.0180655	0.0298005
0.2282	0.0509899	-0.0180878	0.0297499
0.2284	0.0507652	-0.0183166	0.0298279
0.2286	0.0508723	-0.0178619	0.0297794
0.2288	0.0507757	-0.0181911	0.0297984
0.229	0.0505929	-0.0182162	0.0299735
0.2292	0.0506268	-0.0180739	0.0298364
0.2294	0.0506843	-0.018258	0.0297963
0.2296	0.0506582	-0.0182273	0.0297351
0.2298	0.0510055	-0.0181855	0.0296064
0.23	0.051238	-0.01835	0.0296697
0.2302	0.0506843	-0.0179986	0.0297034
0.2304	0.0510108	-0.0183277	0.0297963
0.2306	0.051029	-0.0181241	0.0298089
0.2308	0.0507444	-0.0178508	0.0298469
0.231	0.051238	-0.0181883	0.0298321
0.2312	0.0511701	-0.0182385	0.0298237
0.2314	0.0508567	-0.01794	0.0299229
0.2316	0.0511701	-0.0181687	0.0297435
0.2318	0.0512667	-0.018007	0.0297161
0.232	0.0509742	-0.017993	0.0297309
0.2322	0.0511544	-0.0181994	0.0296211
0.2324	0.0510238	-0.0181715	0.0297857
0.2326	0.0509507	-0.0179958	0.0298258
0.2328	0.0512432	-0.0182747	0.0297309
0.233	0.0509585	-0.0182245	0.0298258
0.2332	0.050935	-0.0179428	0.0297878
0.2334	0.0512563	-0.0181966	0.0296591
0.2336	0.0508932	-0.0179261	0.0297372
0.2338	0.0512432	-0.0179819	0.0297456
0.234	0.0515201	-0.0180376	0.0295768
0.2342	0.0509846	-0.0179289	0.0296507
0.2344	0.0504153	-0.0178731	0.0295937
0.2346	0.0505642	-0.0181492	0.0297731
0.2348	0.0510082	-0.0178564	0.0296317
0.235	0.0509481	-0.0179902	0.0296908
0.2352	0.0512223	-0.0182636	0.0296697
0.2354	0.0508645	-0.0178982	0.0296887
0.2356	0.0511884	-0.0180014	0.0295557
0.2358	0.0508619	-0.018152	0.029771
0.236	0.0515201	-0.0179149	0.0296465
0.2362	0.051413	-0.0182998	0.0296528
0.2364	0.0512406	-0.0180655	0.0297878
0.2366	0.051588	-0.0178675	0.0296718
0.2368	0.0517603	-0.0181771	0.0295811
0.237	0.0514966	-0.0181074	0.0295579
0.2372	0.0513738	-0.0180209	0.0296971
0.2374	0.0515357	-0.018046	0.0298406
0.2376	0.0509951	-0.0179344	0.0296992
0.2378	0.0517812	-0.017954	0.0297288
0.238	0.0515305	-0.0181436	0.0297393
0.2382	0.0515592	-0.0180655	0.0297731
0.2384	0.0513555	-0.0179066	0.0297731
0.2386	0.0510865	-0.0180237	0.0296338
0.2388	0.0514652	-0.0180014	0.029752
0.239	0.0518413	-0.0178229	0.0298406
0.2392	0.051601	-0.0182078	0.0297794
0.2394	0.0519614	-0.0179623	0.0296528
0.2396	0.0514051	-0.0177922	0.0299292
0.2398	0.0515514	-0.0181632	0.0298469
0.24	0.0515697	-0.0178033	0.0298933
0.2402	0.0517969	-0.0179986	0.029887
0.2404	0.0515096	-0.0180739	0.0297583
0.2406	0.0517603	-0.0179317	0.0297878
0.2408	0.051144	-0.0181102	0.0298364
0.241	0.0511831	-0.0181129	0.0297309
0.2412	0.0508018	-0.0176081	0.0297857
0.2414	0.050619	-0.0180655	0.0297815
0.2416	0.0511178	-0.0177727	0.0296528
0.2418	0.0508984	-0.0177699	0.0298026
0.242	0.0509846	-0.0180376	0.0296338
0.2422	0.0514861	-0.0179233	0.0297667
0.2424	0.0510447	-0.0177755	0.0295515
0.2426	0.0509899	-0.0181269	0.029714
0.2428	0.0509951	-0.0176723	0.0296465
0.243	0.0506556	-0.0179428	0.029657
0.2432	0.0505432	-0.0179177	0.0296992
0.2434	0.0512066	-0.0177643	0.029619
0.2436	0.0510395	-0.0179205	0.0297351
0.2438	0.0510761	-0.0179986	0.0298701
0.244	0.0512563	-0.0178508	0.0296422
0.2442	0.0513686	-0.0181241	0.0298068
0.2444	0.050982	-0.0179484	0.0297288
0.2446	0.051204	-0.0177336	0.0297288
0.2448	0.0504623	-0.0181353	0.0298047
0.245	0.0506843	-0.0178675	0.0298089
0.2452	0.0506086	-0.0177615	0.0298448
0.2454	0.0503709	-0.0181241	0.0299123
0.2456	0.0506007	-0.0177894	0.0298849
0.2458	0.0507548	-0.0180572	0.0298575
0.246	0.050141	-0.0180739	0.0297878
0.2462	0.0498328	-0.0178591	0.0296064
0.2464	0.0502011	-0.0181548	0.0298807
0.2466	0.0502742	-0.0178898	0.0298174
0.2468	0.0503761	-0.0177308	0.0299651
0.247	0.0502612	-0.0181213	0.0299461
0.2472	0.0502742	-0.0179093	0.029733
0.2474	0.0501228	-0.0180962	0.0298743
0.2476	0.0499948	-0.0179428	0.029925
0.2478	0.050491	-0.0181408	0.0297836
0.248	0.0502742	-0.0179735	0.0297815
0.2482	0.0500757	-0.0177476	0.0299714
0.2484	0.0505955	-0.018099	0.0298743
0.2486	0.0507914	-0.0178452	0.029944
0.2488	0.050303	-0.0181297	0.0300853
0.249	0.0507418	-0.0180432	0.029771
0.2492	0.0508175	-0.0179289	0.0298912
0.2494	0.0505563	-0.0179958	0.0300199
0.2496	0.0505328	-0.0178815	0.0298258
0.2498	0.0503944	-0.0179763	0.0301317
0.25	0.0499896	-0.0178731	0.0299925
0.2502	0.0505015	-0.017834	0.0299883
0.2504	0.0504074	-0.0180823	0.0299967
0.2506	0.0502638	-0.0178954	0.0299292
0.2508	0.0502977	-0.0177085	0.02983
0.251	0.0509507	-0.0179428	0.0300431
0.2512	0.0508671	-0.0178145	0.0298891
0.2514	0.050935	-0.0179344	0.0298364
0.2516	0.0511779	-0.0180153	0.0299566
0.2518	0.0513398	-0.0178061	0.0297899
0.252	0.0521234	-0.0182106	0.0299144
0.2522	0.0518047	-0.0178173	0.0299862
0.2524	0.0513033	-0.0179205	0.0299018
0.2526	0.0513999	-0.0179847	0.0299904
0.2528	0.0513607	-0.0178033	0.0299461
0.253	0.0513033	-0.0179874	0.0298532
0.2532	0.0516585	-0.017848	0.0297731
0.2534	0.0517368	-0.0178842	0.0298912
0.2536	0.0518674	-0.0175914	0.0299039
0.2538	0.0524185	-0.0178145	0.0298174
0.254	0.0525413	-0.0177002	0.0299925
0.2542	0.0524577	-0.0176248	0.0297477
0.2544	0.0526614	-0.0179623	0.0298912
0.2546	0.0525517	-0.0178061	0.0297562
0.2548	0.0526196	-0.0178284	0.0298174
0.255	0.0529278	-0.0179177	0.0298216
0.2552	0.0525413	-0.017597	0.0298933
0.2554	0.0527058	-0.0178368	0.0298553
0.2556	0.0527058	-0.0179317	0.0299418
0.2558	0.0526431	-0.0176974	0.0299207
0.256	0.0524316	-0.0180014	0.029868
0.2562	0.0524446	-0.0178508	0.0299608
0.2564	0.0522487	-0.0176639	0.0298427
0.2566	0.0524942	-0.0178591	0.0298701
0.2568	0.0522357	-0.0178787	0.0298342
0.257	0.0522252	-0.0176667	0.0296739
0.2572	0.0523689	-0.0179623	0.029771
0.2574	0.0522096	-0.0179121	0.0299925
0.2576	0.0521051	-0.0175718	0.029944
0.2578	0.0521521	-0.0177866	0.0297646
0.258	0.0520633	-0.0178396	0.0299165
0.2582	0.0526457	-0.0176946	0.0296422
0.2584	0.0521887	-0.0178061	0.0298005
0.2586	0.0518439	-0.0178675	0.029887
0.2588	0.0521077	-0.0177643	0.0298195
0.259	0.0517891	-0.0178787	0.0299313
0.2592	0.0520267	-0.0179066	0.0298659
0.2594	0.0523663	-0.0177866	0.0299798
0.2596	0.0523402	-0.0177755	0.0299355
0.2598	0.0525308	-0.0179121	0.0299524
0.26	0.0521834	-0.0174714	0.0298511
0.2602	0.0521652	-0.0177169	0.0299777
0.2604	0.0521834	-0.0178145	0.0299039
0.2606	0.0520476	-0.0176639	0.0299186
0.2608	0.052254	-0.0180516	0.0297984
0.261	0.0522749	-0.0176751	0.0298385
0.2612	0.0520032	-0.0178284	0.0299608
0.2614	0.0522592	-0.0178145	0.0300241
0.2616	0.0523976	-0.0174686	0.0297562
0.2618	0.0524002	-0.0177559	0.029906
0.262	0.0524342	-0.0176193	0.0298532
0.2622	0.052651	-0.0175691	0.0300452
0.2624	0.0522096	-0.0176165	0.029887
0.2626	0.0520868	-0.0177587	0.030041
0.2628	0.0521364	-0.0175356	0.0299376
0.263	0.0519144	-0.0175997	0.0300474
0.2632	0.0519379	-0.0173794	0.0299587
0.2634	0.0521234	-0.0179512	0.0298596
0.2636	0.0517342	-0.0177755	0.0299165
0.2638	0.0519066	-0.0177782	0.0299376
0.264	0.0521051	-0.0179484	0.0298427
0.2642	0.0519197	-0.0176862	0.0300284
0.2644	0.0519327	-0.0177504	0.0300073
0.2646	0.0517995	-0.0178564	0.0297224
0.2648	0.051857	-0.0177978	0.029887
0.265	0.0520111	-0.0176862	0.0297921
0.2652	0.0517421	-0.0179679	0.029733
0.2654	0.051541	-0.017597	0.0298385
0.2656	0.0516559	-0.0177197	0.0298068
0.2658	0.0514025	-0.0178536	0.0295874
0.266	0.0511178	-0.0176109	0.0297203
0.2662	0.0513111	-0.0177922	0.0295979
0.2664	0.051191	-0.0177057	0.0297731
0.2666	0.0510421	-0.0175746	0.0298005
0.2668	0.0512171	-0.0178675	0.0297288
0.267	0.0511048	-0.0176053	0.0296823
0.2672	0.0511152	-0.0178033	0.029638
0.2674	0.0513216	-0.0175858	0.0297224
0.2676	0.0513398	-0.0176806	0.0297731
0.2678	0.0512093	-0.0178089	0.029868
0.268	0.0515645	-0.0177029	0.0299165
0.2682	0.0516219	-0.0176974	0.0300495
0.2684	0.0520711	-0.0178564	0.0299229
0.2686	0.0520973	-0.0176193	0.0299418
0.2688	0.0516141	-0.0177559	0.0299925
0.269	0.0518361	-0.0175914	0.0299629
0.2692	0.0523715	-0.0177615	0.0298237
0.2694	0.0522461	-0.0175356	0.0299587
0.2696	0.0521573	-0.0175858	0.0298786
0.2698	0.0523689	-0.0179121	0.0299334
0.27	0.0520058	-0.0175384	0.0299967
0.2702	0.0522801	-0.0178033	0.0299292
0.2704	0.0525439	-0.0178536	0.0299545
0.2706	0.0522514	-0.0175495	0.0300853
0.2708	0.0527058	-0.0175467	0.0299524
0.271	0.0525961	-0.0179205	0.030117
0.2712	0.0520738	-0.0174659	0.0301655
0.2714	0.0525622	-0.0177727	0.0300621
0.2716	0.0519536	-0.0177866	0.0299482
0.2718	0.0521678	-0.0176472	0.0301465
0.272	0.0525256	-0.0178257	0.0301149
0.2722	0.0523375	-0.0177085	0.0298575
0.2724	0.0524002	-0.0176137	0.0299376
0.2726	0.0524577	-0.0178229	0.029868
0.2728	0.0522644	-0.0177113	0.029906
0.273	0.0522958	-0.0174937	0.0300368
0.2732	0.0525543	-0.017901	0.0299102
0.2734	0.0522461	-0.0177922	0.02983
0.2736	0.0521756	-0.0176193	0.0298975
0.2738	0.0523663	-0.0176248	0.0298089
0.274	0.0526588	-0.0176332	0.0298575
0.2742	0.052651	-0.0175133	0.0300157
0.2744	0.0531002	-0.0176248	0.0299819
0.2746	0.0530375	-0.0175133	0.0301085
0.2748	0.0524707	-0.0175607	0.0299271
0.275	0.0526875	-0.0176388	0.0299608
0.2752	0.0523637	-0.0174519	0.0300326
0.2754	0.0523245	-0.0178731	0.0299229
0.2756	0.0518805	-0.0176667	0.0298321
0.2758	0.0521913	-0.0173961	0.0299397
0.276	0.0524237	-0.017834	0.0298891
0.2762	0.0522984	-0.0176639	0.0298068
0.2764	0.0519745	-0.0173682	0.0300706
0.2766	0.0521547	-0.0177476	0.029925
0.2768	0.052079	-0.0175384	0.0297878
0.277	0.0522174	-0.0175412	0.0298975
0.2772	0.0524394	-0.0178926	0.0299334
0.2774	0.0524995	-0.0175746	0.0298553
0.2776	0.0523245	-0.0176555	0.0298153
0.2778	0.052886	-0.017728	0.0297731
0.278	0.0524211	-0.0176667	0.029849
0.2782	0.0523715	-0.0174937	0.0296612
0.2784	0.052079	-0.0177141	0.0297245
0.2786	0.0518126	-0.0176611	0.0298786
0.2788	0.0518178	-0.0175802	0.0298258
0.279	0.0521782	-0.017781	0.0298575
0.2792	0.0522096	-0.0175886	0.0298933
0.2794	0.0527424	-0.0174937	0.0297625
0.2796	0.0521208	-0.0178675	0.0298786
0.2798	0.0523898	-0.0176639	0.0299313
0.28	0.0522305	-0.0175077	0.029752
0.2802	0.0520711	-0.0177392	0.0298596
0.2804	0.052476	-0.0175579	0.0297963
0.2806	0.0522592	-0.0176025	0.0298701
0.2808	0.0520294	-0.017781	0.0298279
0.281	0.0518126	-0.0174184	0.0298279
0.2812	0.0519771	-0.0177336	0.0300685
0.2814	0.0518935	-0.0173515	0.0300748
0.2816	0.0519536	-0.0176221	0.0299376
0.2818	0.0519693	-0.0176165	0.0299608
0.282	0.0522017	-0.0176165	0.0299862
0.2822	0.0519667	-0.0174017	0.0300368
0.2824	0.0518491	-0.0175384	0.0299102
0.2826	0.0515305	-0.0175161	0.0300621
0.2828	0.0515723	-0.0175328	0.0300094
0.283	0.0520476	-0.017742	0.0301317
0.2832	0.0514208	-0.0173376	0.0300769
0.2834	0.0517055	-0.0174157	0.0300431
0.2836	0.0516062	-0.0178536	0.0301444
0.2838	0.0515018	-0.0175356	0.0300579
0.284	0.0518491	-0.0175244	0.030136
0.2842	0.0518309	-0.0177364	0.0299186
0.2844	0.0520032	-0.01753	0.0300157
0.2846	0.0517159	-0.0176695	0.0301149
0.2848	0.0521155	-0.0175942	0.0300917
0.285	0.0518178	-0.0175635	0.0298933
0.2852	0.0517812	-0.0178312	0.0299397
0.2854	0.0516402	-0.017544	0.0299714
0.2856	0.0521887	-0.0174463	0.029887
0.2858	0.0520999	-0.0178926	0.0299862
0.286	0.0520294	-0.01753	0.0300157
0.2862	0.052583	-0.0175997	0.0300917
0.2864	0.0521913	-0.0178424	0.0300579
0.2866	0.05257	-0.0175272	0.0301128
0.2868	0.0525282	-0.0176248	0.0300199
0.287	0.0524081	-0.0177755	0.0300853
0.2872	0.0526588	-0.0173264	0.0299735
0.2874	0.0528077	-0.017689	0.030022
0.2876	0.0525491	-0.0176137	0.0301613
0.2878	0.0525961	-0.0177978	0.0301528
0.288	0.0523793	-0.0176444	0.030176
0.2882	0.0525752	-0.017636	0.0301402
0.2884	0.0532647	-0.0177531	0.030136
0.2886	0.052758	-0.017491	0.030195
0.2888	0.0527345	-0.0177029	0.0301444
0.289	0.0524629	-0.0175997	0.0300769
0.2892	0.0530088	-0.0177141	0.0302225
0.2894	0.0530636	-0.017583	0.0301339
0.2896	0.0535259	-0.0176137	0.0302119
0.2898	0.0531942	-0.0177364	0.0301613
0.29	0.0532099	-0.0177057	0.0300157
0.2902	0.0533901	-0.0173906	0.0302056
0.2904	0.0532987	-0.0176862	0.0302731
0.2906	0.0528991	-0.017583	0.0301085
0.2908	0.0533483	-0.017438	0.0301592
0.291	0.0528808	-0.0176751	0.0302056
0.2912	0.0525465	-0.0177392	0.0300663
0.2914	0.052617	-0.0175942	0.0301001
0.2916	0.0521965	-0.0177782	0.0301064
0.2918	0.0525334	-0.0177476	0.0299967
0.292	0.0530088	-0.0175356	0.0299819
0.2922	0.0527894	-0.0178229	0.0301212
0.2924	0.0530375	-0.0176751	0.0301676
0.2926	0.052826	-0.01753	0.0301613
0.2928	0.052664	-0.0177169	0.0302436
0.293	0.0526431	-0.0174937	0.0300917
0.2932	0.0528495	-0.017848	0.0301191
0.2934	0.0520607	-0.0177838	0.0301254
0.2936	0.052933	-0.0173794	0.0301507
0.2938	0.0531812	-0.0175858	0.0301803
0.294	0.0529513	-0.0176081	0.0299946
0.2942	0.0527215	-0.0173376	0.0300389
0.2944	0.0525413	-0.0175607	0.0302372
0.2946	0.0524995	-0.0176778	0.0301718
0.2948	0.0530662	-0.0175077	0.0303111
0.295	0.0524786	-0.0178424	0.0301887
0.2952	0.0522566	-0.0175746	0.0301381
0.2954	0.0529774	-0.0172957	0.0300832
0.2956	0.0524159	-0.0176751	0.0301233
0.2958	0.0526483	-0.0174631	0.0301655
0.296	0.0527972	-0.0174854	0.0301634
0.2962	0.05292	-0.0177559	0.0301845
0.2964	0.0531394	-0.0174408	0.0301549
0.2966	0.0532987	-0.0173041	0.0302879
0.2968	0.0529278	-0.0178257	0.0300157
0.297	0.0529383	-0.0175914	0.0300895
0.2972	0.0533326	-0.0174184	0.030176
0.2974	0.0525961	-0.0176611	0.0300452
0.2976	0.053108	-0.0173599	0.0302225
0.2978	0.0526823	-0.0174184	0.0302035
0.298	0.0528834	-0.0177113	0.0300642
0.2982	0.052698	-0.0174463	0.0301592
0.2984	0.052758	-0.0172929	0.0302457
0.2986	0.0525386	-0.0175774	0.0300959
0.2988	0.0531133	-0.0173822	0.0301592
0.299	0.052617	-0.0172762	0.0300305
0.2992	0.0529148	-0.0175523	0.0300537
0.2994	0.0528416	-0.0174659	0.030136
0.2996	0.0528573	-0.0173125	0.0301043
0.2998	0.0529383	-0.0175356	0.0302288
0.3	0.0531629	-0.0174073	0.0301507
0.3002	0.0527998	-0.0172957	0.0302035
0.3004	0.0530245	-0.017597	0.0301296
0.3006	0.0526405	-0.0173013	0.0301423
0.3008	0.0528024	-0.0174603	0.0302056
0.301	0.0525935	-0.0175746	0.0302182
0.3012	0.0526483	-0.0173292	0.0302773
0.3014	0.0525178	-0.0174296	0.0300874
0.3016	0.0530088	-0.0175161	0.0301845
0.3018	0.0527163	-0.017279	0.0301803
0.302	0.0531028	-0.0175412	0.0302225
0.3022	0.0533979	-0.017385	0.0302372
0.3024	0.0530245	-0.017544	0.0301001
0.3026	0.0530584	-0.0176806	0.030214
0.3028	0.0530897	-0.0173933	0.0301085
0.303	0.0532569	-0.0175272	0.0302752
0.3032	0.0529383	-0.0175216	0.0301803
0.3034	0.0529957	-0.0173655	0.0300853
0.3036	0.052792	-0.0175105	0.0301149
0.3038	0.0532987	-0.0176778	0.0301043
0.304	0.0532099	-0.0172901	0.0302963
0.3042	0.0534241	-0.0176583	0.0301064
0.3044	0.0535207	-0.0174324	0.0301676
0.3046	0.0534998	-0.0174631	0.0302647
0.3048	0.0534267	-0.017438	0.0300621
0.305	0.0535207	-0.0173069	0.0300495
0.3052	0.0539229	-0.0176248	0.0301486
0.3054	0.0538889	-0.0172873	0.030117
0.3056	0.0541841	-0.0173236	0.0301001
0.3058	0.053774	-0.0175774	0.0302963
0.306	0.0534005	-0.017279	0.0301929
0.3062	0.0538158	-0.0175523	0.0300621
0.3064	0.0538811	-0.0174491	0.0301064
0.3066	0.0539125	-0.0173152	0.0302035
0.3068	0.0539699	-0.0176053	0.0302246
0.307	0.0539281	-0.017424	0.0302415
0.3072	0.0541292	-0.0176946	0.0302182
0.3074	0.0537845	-0.017226	0.030117
0.3076	0.054158	-0.0174408	0.0302647
0.3078	0.0542233	-0.0175077	0.030098
0.308	0.0538158	-0.0174435	0.0300452
0.3082	0.0538419	-0.0175607	0.0300474
0.3084	0.0543773	-0.0175886	0.0301149
0.3086	0.0541188	-0.0174491	0.0301339
0.3088	0.0542677	-0.0175607	0.0300727
0.309	0.0543512	-0.017689	0.0299693
0.3092	0.0541789	-0.0175272	0.0300516
0.3094	0.0542363	-0.0175188	0.0299925
0.3096	0.0541893	-0.0175802	0.0301043
0.3098	0.0541971	-0.0176723	0.030233
0.31	0.0541031	-0.01753	0.0302351
0.3102	0.0543826	-0.0176611	0.0300347
0.3104	0.0541997	-0.0175774	0.0301106
0.3106	0.0542885	-0.0175356	0.0301971
0.3108	0.0540195	-0.0177448	0.0301929
0.311	0.0539804	-0.0176834	0.0302351
0.3112	0.0541501	-0.0177392	0.0302394
0.3114	0.0542938	-0.017728	0.030098
0.3116	0.0536121	-0.0174937	0.0300621
0.3118	0.0539986	-0.0176918	0.0299777
0.312	0.0537453	-0.0178145	0.0298406
0.3122	0.0535155	-0.0177085	0.0300769
0.3124	0.0539542	-0.0177002	0.029887
0.3126	0.0539725	-0.0177169	0.0300347
0.3128	0.0540561	-0.0175216	0.0301571
0.313	0.0541266	-0.0180098	0.0301613
0.3132	0.054218	-0.0177225	0.0300938
0.3134	0.0538472	-0.0174965	0.0300157
0.3136	0.0542154	-0.0178145	0.029868
0.3138	0.0544635	-0.0175579	0.0298954
0.314	0.0544191	-0.017636	0.029925
0.3142	0.0543382	-0.0177727	0.0298743
0.3144	0.0545053	-0.0177615	0.0302119
0.3146	0.054474	-0.0173208	0.0299629
0.3148	0.054662	-0.0177894	0.0300474
0.315	0.0545811	-0.0177699	0.0301571
0.3152	0.0545288	-0.0175691	0.0299777
0.3154	0.0547352	-0.0179344	0.030041
0.3156	0.0543251	-0.0175942	0.0301697
0.3158	0.0543042	-0.0177057	0.0300009
0.316	0.0545236	-0.0178787	0.0301254
0.3162	0.0542441	-0.0176193	0.0301592
0.3164	0.0540483	-0.017781	0.0302077
0.3166	0.0542102	-0.017834	0.0303111
0.3168	0.0540169	-0.0175523	0.0299946
0.317	0.0538785	-0.0177308	0.0300748
0.3172	0.0541945	-0.0176611	0.0301106
0.3174	0.0536722	-0.0175272	0.029887
0.3176	0.0539151	-0.017901	0.0299904
0.3178	0.0535938	-0.0176918	0.030136
0.318	0.0539673	-0.0175161	0.0300685
0.3182	0.0537923	-0.0179177	0.0300642
0.3184	0.0537427	-0.017597	0.0300305
0.3186	0.0532021	-0.017371	0.0300009
0.3188	0.05368	-0.0176834	0.0299988
0.319	0.0534737	-0.0176834	0.0300284
0.3192	0.0536225	-0.0175105	0.0299482
0.3194	0.0538393	-0.0178033	0.0300621
0.3196	0.053727	-0.0176862	0.0298385
0.3198	0.0539882	-0.0175495	0.0301064
0.32	0.0540953	-0.0176276	0.0300009
0.3202	0.0538733	-0.017424	0.0298743
0.3204	0.0539569	-0.0176416	0.0299693
0.3206	0.0539098	-0.017583	0.0300938
0.3208	0.0541083	-0.0176137	0.0301444
0.321	0.0544427	-0.0176053	0.0298912
0.3212	0.0540509	-0.0176025	0.0300938
0.3214	0.0540692	-0.0173794	0.0299756
0.3216	0.0542363	-0.0176165	0.0301106
0.3218	0.0535781	-0.0171758	0.0302035
0.322	0.0541841	-0.0173878	0.0301043
0.3222	0.0540274	-0.017583	0.0302246
0.3224	0.0542259	-0.0172455	0.0300685
0.3226	0.0541423	-0.0175356	0.0300516
0.3228	0.0543747	-0.017491	0.0299229
0.323	0.0543329	-0.0173989	0.0299229
0.3232	0.0542546	-0.0172093	0.0298427
0.3234	0.0543747	-0.0175691	0.0298933
0.3236	0.0538785	-0.0175691	0.0297857
0.3238	0.054077	-0.0175914	0.0300052
0.324	0.0540248	-0.0175635	0.0301001
0.3242	0.0541371	-0.0174993	0.029925
0.3244	0.0540874	-0.01765	0.0299144
0.3246	0.0536957	-0.0175579	0.0299904
0.3248	0.0536696	-0.0172929	0.0298638
0.325	0.0537218	-0.0176221	0.0299693
0.3252	0.0535259	-0.0173906	0.0300263
0.3254	0.0537035	-0.0175216	0.0298532
0.3256	0.0536591	-0.0176639	0.0300558
0.3258	0.0536461	-0.0173041	0.0300621
0.326	0.0537897	-0.0173933	0.0300579
0.3262	0.053539	-0.0174603	0.0302457
0.3264	0.0535781	-0.0172483	0.0301064
0.3266	0.0537897	-0.01753	0.03006
0.3268	0.0537584	-0.0174352	0.0302541
0.327	0.0533535	-0.0173459	0.0302267
0.3272	0.0538289	-0.017597	0.0302267
0.3274	0.0539464	-0.0172455	0.0302858
0.3276	0.0534554	-0.0174352	0.0302246
0.3278	0.0537557	-0.0174212	0.030176
0.328	0.0535076	-0.0173292	0.0302267
0.3282	0.0537218	-0.0172511	0.0300326
0.3284	0.0546229	-0.0175384	0.0300347
0.3286	0.0544453	-0.0173906	0.0301254
0.3288	0.0543565	-0.0176053	0.030079
0.329	0.05438	-0.0175718	0.0301444
0.3292	0.0543408	-0.0171702	0.0300895
0.3294	0.0540248	-0.0176639	0.0300431
0.3296	0.0540587	-0.0172455	0.0301634
0.3298	0.0539647	-0.0176472	0.0301022
0.33	0.053599	-0.0174631	0.0300663
0.3302	0.0540378	-0.0175691	0.0303195
0.3304	0.0536382	-0.0173738	0.030079
0.3306	0.0536434	-0.017597	0.0300621
0.3308	0.0537688	-0.017477	0.030003
0.331	0.0534815	-0.0172176	0.0299207
0.3312	0.0539255	-0.0176444	0.0299503
0.3314	0.0538445	-0.0172567	0.0300642
0.3316	0.0534476	-0.0172734	0.0299946
0.3318	0.0542102	-0.0175412	0.0299524
0.332	0.0542833	-0.0174854	0.0301064
0.3322	0.0537584	-0.017371	0.03006
0.3324	0.0542259	-0.0176583	0.030136
0.3326	0.0542859	-0.0174686	0.0302014
0.3328	0.0538106	-0.0173961	0.0300474
0.333	0.0544217	-0.0177364	0.0302182
0.3332	0.0542755	-0.0175161	0.0300685
0.3334	0.0536826	-0.0174547	0.0299102
0.3336	0.0541423	-0.017279	0.0301571
0.3338	0.0542624	-0.017265	0.0300009
0.334	0.0539777	-0.0173543	0.030117
0.3342	0.0539908	-0.0177002	0.0301402
0.3344	0.0541292	-0.0174184	0.0302119
0.3346	0.0537349	-0.0171925	0.0301085
0.3348	0.054171	-0.0175356	0.0300748
0.335	0.0538785	-0.0175133	0.0300347
0.3352	0.0538472	-0.0174017	0.0300537
0.3354	0.0540457	-0.0177085	0.0300832
0.3356	0.0537009	-0.017332	0.0300811
0.3358	0.0540091	-0.0175021	0.0300178
0.336	0.0541867	-0.0177782	0.0301887
0.3362	0.054218	-0.0174686	0.0300115
0.3364	0.0543904	-0.0175746	0.0301929
0.3366	0.0544191	-0.0176974	0.03006
0.3368	0.0542938	-0.017385	0.029925
0.337	0.0546255	-0.0176221	0.0301339
0.3372	0.0547221	-0.0177002	0.0299651
0.3374	0.0541345	-0.0173878	0.0301549
0.3376	0.0542259	-0.017477	0.0301697
0.3378	0.0541632	-0.0176248	0.030098
0.338	0.0544427	-0.0174686	0.0301697
0.3382	0.0543329	-0.0176193	0.0301381
0.3384	0.0540639	-0.0177755	0.0301317
0.3386	0.0538393	-0.0174854	0.030176
0.3388	0.0543356	-0.0175105	0.0300769
0.339	0.0540796	-0.0176165	0.0301444
0.3392	0.0540874	-0.0172288	0.0302204
0.3394	0.0545341	-0.0176248	0.0298975
0.3396	0.0545132	-0.0177141	0.0299714
0.3398	0.0546594	-0.0174659	0.0299841
0.34	0.0545158	-0.0175244	0.0301592
0.3402	0.0545471	-0.0175997	0.0300938
0.3404	0.0543303	-0.0175607	0.0299946
0.3406	0.0542572	-0.0176583	0.0300685
0.3408	0.0545132	-0.017597	0.0300241
0.341	0.0541318	-0.0173989	0.0299841
0.3412	0.0545262	-0.017583	0.0299461
0.3414	0.0543068	-0.0175412	0.0299334
0.3416	0.0547717	-0.0174324	0.0299756
0.3418	0.0540979	-0.0175467	0.0300748
0.342	0.0543904	-0.0175077	0.0299207
0.3422	0.0541501	-0.0173961	0.0299608
0.3424	0.0542285	-0.0173794	0.0299355
0.3426	0.0539464	-0.0175216	0.0300115
0.3428	0.0546098	-0.0171005	0.029906
0.343	0.054602	-0.0174686	0.0298786
0.3432	0.0544583	-0.0173404	0.0300811
0.3434	0.0548031	-0.0174659	0.0299418
0.3436	0.0545889	-0.0177671	0.0300347
0.3438	0.0545732	-0.0174324	0.0298807
0.344	0.054568	-0.0176332	0.0299883
0.3442	0.0543408	-0.0177894	0.0300811
0.3444	0.0540639	-0.017226	0.0299672
0.3446	0.0545079	-0.0176695	0.0299883
0.3448	0.0540535	-0.0176416	0.0300199
0.345	0.0545236	-0.0172316	0.0298891
0.3452	0.0541371	-0.017544	0.0299229
0.3454	0.0541188	-0.0175551	0.0300853
0.3456	0.0544191	-0.0171814	0.0299271
0.3458	0.0540013	-0.0175412	0.0299819
0.346	0.0539464	-0.0175272	0.0300642
0.3462	0.0541057	-0.0172901	0.0300621
0.3464	0.0540744	-0.0175551	0.0299967
0.3466	0.054205	-0.017265	0.0301465
0.3468	0.0542546	-0.0175328	0.0300642
0.347	0.0544714	-0.0175942	0.029925
0.3472	0.0545941	-0.0174184	0.0299925
0.3474	0.0546725	-0.0172427	0.0299165
0.3476	0.0545053	-0.0173682	0.0299672
0.3478	0.054474	-0.0174882	0.0299186
0.348	0.0547665	-0.0174631	0.0300241
0.3482	0.0543643	-0.0175105	0.0300094
0.3484	0.054884	-0.0176444	0.0301549
0.3486	0.0550773	-0.0172344	0.0300284
0.3488	0.0546072	-0.0176639	0.0298912
0.349	0.0550042	-0.0175579	0.0301254
0.3492	0.0549311	-0.0174519	0.0300811
0.3494	0.0545785	-0.0174491	0.0301486
0.3496	0.0548736	-0.017212	0.0302309
0.3498	0.0549337	-0.0175858	0.0299355
0.35	0.0548527	-0.0175495	0.0300558
0.3502	0.0552027	-0.0172037	0.0301317
0.3504	0.0548449	-0.0176639	0.0300769
0.3506	0.0549311	-0.0173906	0.0302098
0.3508	0.0550904	-0.0172455	0.0301296
0.351	0.0548475	-0.0176695	0.0301929
0.3512	0.0546855	-0.017477	0.0301128
0.3514	0.0549154	-0.0174742	0.0301613
0.3516	0.0545236	-0.0176806	0.0300516
0.3518	0.0548971	-0.0173404	0.0301634
0.352	0.0549807	-0.0175384	0.0301106
0.3522	0.0548057	-0.0175858	0.0301993
0.3524	0.0547822	-0.0175886	0.0301971
0.3526	0.0548919	-0.0175272	0.0301971
0.3528	0.0544792	-0.0177587	0.0301212
0.353	0.0547038	-0.017424	0.030347
0.3532	0.0549572	-0.0175188	0.0300959
0.3534	0.0549624	-0.0176276	0.0301845
0.3536	0.0548893	-0.0173041	0.0302457
0.3538	0.055012	-0.0173097	0.0301676
0.354	0.0550434	-0.017544	0.0302309
0.3542	0.0548031	-0.0175328	0.0302562
0.3544	0.0550512	-0.0173682	0.0301128
0.3546	0.0547325	-0.017491	0.0301444
0.3548	0.0549258	-0.0173599	0.0300874
0.355	0.0551374	-0.0173487	0.0301866
0.3552	0.054696	-0.0174101	0.0301592
0.3554	0.0546881	-0.0171981	0.0300495
0.3556	0.0545158	-0.0175328	0.0301528
0.3558	0.0547352	-0.0175188	0.0300853
0.356	0.0546411	-0.0171144	0.0301381
0.3562	0.0547717	-0.0175997	0.0302119
0.3564	0.0545027	-0.0176527	0.0301317
0.3566	0.0548318	-0.0172483	0.030214
0.3568	0.0546255	-0.0176137	0.0300052
0.357	0.0545027	-0.0175746	0.0301402
0.3572	0.0547665	-0.0172762	0.0301317
0.3574	0.0547874	-0.0176304	0.0300115
0.3576	0.0551583	-0.0175467	0.030003
0.3578	0.054884	-0.0174129	0.0301528
0.358	0.0549676	-0.0175523	0.0301022
0.3582	0.0550329	-0.0176946	0.0302583
0.3584	0.0549232	-0.0173682	0.030309
0.3586	0.0546516	-0.0175635	0.0301423
0.3588	0.0551792	-0.017636	0.0302035
0.359	0.055093	-0.0173794	0.0300748
0.3592	0.0546986	-0.0173571	0.0302351
0.3594	0.0550329	-0.0176332	0.0302689
0.3596	0.0549206	-0.0173989	0.0303174
0.3598	0.0551478	-0.0174547	0.0302773
0.36	0.0547848	-0.0176304	0.0300474
0.3602	0.0547952	-0.017318	0.0302457
0.3604	0.0543617	-0.0175746	0.0302668
0.3606	0.0537923	-0.0176639	0.0302984
0.3608	0.0539804	-0.0174659	0.0301929
0.361	0.0544087	-0.0176388	0.0301993
0.3612	0.0541841	-0.0174129	0.0302098
0.3614	0.0543251	-0.0173264	0.0300748
0.3616	0.0540404	-0.0176611	0.0301191
0.3618	0.054252	-0.0173152	0.0301381
0.362	0.0544191	-0.0174993	0.030079
0.3622	0.0544087	-0.0175328	0.030117
0.3624	0.0541997	-0.0173069	0.0301444
0.3626	0.0541815	-0.0176388	0.0302816
0.3628	0.0543538	-0.0175188	0.030195
0.363	0.0540718	-0.0173013	0.0302689
0.3632	0.0538341	-0.0175467	0.0302541
0.3634	0.0541893	-0.0173961	0.0302351
0.3636	0.0540927	-0.017636	0.0302647
0.3638	0.0545132	-0.0176332	0.0302204
0.364	0.0542598	-0.0174854	0.0302689
0.3642	0.0546881	-0.0175635	0.0300347
0.3644	0.0545889	-0.0176778	0.0301718
0.3646	0.05479	-0.0173292	0.0302161
0.3648	0.0544766	-0.0177113	0.0302372
0.365	0.0547482	-0.0174882	0.0301085
0.3652	0.0542233	-0.0175188	0.0301339
0.3654	0.0543565	-0.0174631	0.0302288
0.3656	0.0544087	-0.0173376	0.0303934
0.3658	0.053855	-0.0176081	0.0302689
0.366	0.0540848	-0.0174101	0.0302668
0.3662	0.0539177	-0.0174129	0.0302288
0.3664	0.0541109	-0.0176723	0.0301971
0.3666	0.0543042	-0.0174993	0.0303955
0.3668	0.0540796	-0.0172427	0.0304356
0.367	0.0543982	-0.0175635	0.0302773
0.3672	0.0545602	-0.0173878	0.0301739
0.3674	0.0544818	-0.0174854	0.0302056
0.3676	0.0544035	-0.0175133	0.0303216
0.3678	0.0545367	-0.017544	0.0302837
0.368	0.0542859	-0.0173487	0.0301887
0.3682	0.0541371	-0.0173404	0.0302562
0.3684	0.0546594	-0.0173906	0.030252
0.3686	0.054521	-0.0172846	0.0302689
0.3688	0.0545732	-0.0174547	0.030195
0.369	0.0546934	-0.0174408	0.0303259
0.3692	0.0549049	-0.0172371	0.0301423
0.3694	0.0545941	-0.0174603	0.0303259
0.3696	0.0545053	-0.0172065	0.0302246
0.3698	0.0543121	-0.0175216	0.0301296
0.37	0.0544975	-0.0172316	0.0302014
0.3702	0.054427	-0.017318	0.0302879
0.3704	0.0541919	-0.0175216	0.0301866
0.3706	0.0544348	-0.0172539	0.030214
0.3708	0.0539569	-0.0171841	0.0302731
0.371	0.0542859	-0.0175049	0.0301845
0.3712	0.0545315	-0.0174073	0.0302204
0.3714	0.0542729	-0.0173292	0.0302858
0.3716	0.0545184	-0.0175272	0.0302204
0.3718	0.0545759	-0.0173515	0.0302077
0.372	0.0543486	-0.0177922	0.0301275
0.3722	0.0546176	-0.017438	0.0301718
0.3724	0.0545967	-0.0175858	0.0302879
0.3726	0.0543826	-0.0173766	0.0301803
0.3728	0.0544975	-0.0175718	0.0301824
0.373	0.0546229	-0.0174882	0.0302773
0.3732	0.0543303	-0.0172873	0.0301528
0.3734	0.0542598	-0.0176555	0.030117
0.3736	0.0546516	-0.0172176	0.0302731
0.3738	0.0542729	-0.0172288	0.0301592
0.374	0.0545706	-0.0174937	0.0299904
0.3742	0.0546229	-0.0173961	0.0300769
0.3744	0.0541423	-0.0174798	0.0299735
0.3746	0.0541762	-0.0175495	0.0299503
0.3748	0.0542206	-0.017318	0.0299925
0.375	0.0538785	-0.0174101	0.0300284
0.3752	0.0545288	-0.0174742	0.0299967
0.3754	0.0540169	-0.017212	0.030117
0.3756	0.0537375	-0.0175077	0.0299756
0.3758	0.054205	-0.0173878	0.0300263
0.376	0.0542389	-0.0171981	0.0299629
0.3762	0.0540639	-0.0175607	0.0300157
0.3764	0.0538681	-0.0175886	0.0300832
0.3766	0.0541867	-0.0174826	0.0299229
0.3768	0.0541292	-0.0176053	0.0298469
0.377	0.0544818	-0.0173515	0.0298996
0.3772	0.053949	-0.0174631	0.0299819
0.3774	0.0538237	-0.0176109	0.0300178
0.3776	0.0536957	-0.0175746	0.0300199
0.3778	0.0537819	-0.0171925	0.0300136
0.378	0.0539203	-0.0176723	0.0301212
0.3782	0.0538524	-0.0174519	0.0300199
0.3784	0.0535259	-0.0174268	0.0299672
0.3786	0.054043	-0.0176053	0.0298596
0.3788	0.0541109	-0.017491	0.0299777
0.379	0.0538132	-0.0170977	0.0301001
0.3792	0.0542859	-0.0175746	0.0298996
0.3794	0.0541606	-0.0174463	0.0298659
0.3796	0.0540692	-0.0171646	0.0299271
0.3798	0.0545236	-0.017544	0.0298427
0.38	0.0540065	-0.0171981	0.0298406
0.3802	0.0542833	-0.0173543	0.0298553
0.3804	0.0541658	-0.0175105	0.0298469
0.3806	0.0541266	-0.017212	0.0298764
0.3808	0.0544688	-0.0174798	0.0297245
0.381	0.053949	-0.0174826	0.0297351
0.3812	0.0542415	-0.0172678	0.0298469
0.3814	0.0543251	-0.0172455	0.0297857
0.3816	0.0546725	-0.0174686	0.0298153
0.3818	0.0549702	-0.0172148	0.0300305
0.382	0.0545262	-0.017385	0.0299081
0.3822	0.0545184	-0.0172065	0.0298912
0.3824	0.0543356	-0.0173013	0.0297414
0.3826	0.0537453	-0.017371	0.0299376
0.3828	0.0540796	-0.0173431	0.0297731
0.383	0.0541606	-0.017067	0.0297878
0.3832	0.0537949	-0.0174686	0.0299524
0.3834	0.0542154	-0.0171005	0.0298469
0.3836	0.0541815	-0.0173264	0.0298575
0.3838	0.0543016	-0.0174686	0.0298912
0.384	0.0540483	-0.0173013	0.0297688
0.3842	0.0540979	-0.0175495	0.0299081
0.3844	0.0537557	-0.017385	0.0296887
0.3846	0.0542755	-0.0171897	0.029906
0.3848	0.0541736	-0.017477	0.0297878
0.385	0.0541919	-0.0171814	0.0297921
0.3852	0.0544139	-0.017067	0.0298195
0.3854	0.0543121	-0.0174045	0.0297372
0.3856	0.05444	-0.0170586	0.0298427
0.3858	0.05438	-0.0173766	0.0298722
0.386	0.0543852	-0.017173	0.0297921
0.3862	0.0544374	-0.0171256	0.0298828
0.3864	0.054252	-0.017332	0.0298385
0.3866	0.0541789	-0.0170224	0.0298828
0.3868	0.0546542	-0.0171981	0.030003
0.387	0.0545497	-0.0171535	0.0300832
0.3872	0.0546777	-0.0170503	0.0298132
0.3874	0.0550329	-0.017226	0.0299461
0.3876	0.0550016	-0.017173	0.0300748
0.3878	0.0547508	-0.0172009	0.0299018
0.388	0.0547769	-0.0171646	0.0299482
0.3882	0.0548083	-0.0171563	0.030079
0.3884	0.0547979	-0.0173906	0.0299229
0.3886	0.0549311	-0.0170391	0.0299819
0.3888	0.0548449	-0.0173459	0.0299629
0.389	0.0543121	-0.017318	0.0299566
0.3892	0.0544609	-0.0172093	0.0300284
0.3894	0.0544583	-0.0172734	0.030003
0.3896	0.0541684	-0.0172232	0.0300241
0.3898	0.0543643	-0.0174965	0.0300157
0.39	0.0537793	-0.0171367	0.0298575
0.3902	0.0541162	-0.0172901	0.0298891
0.3904	0.0545158	-0.0173571	0.0299418
0.3906	0.0540901	-0.0170977	0.0300009
0.3908	0.0542102	-0.0172706	0.0300874
0.391	0.0544635	-0.0173208	0.0299967
0.3912	0.0543538	-0.0172511	0.0299313
0.3914	0.054474	-0.0171507	0.0300368
0.3916	0.0544035	-0.0176695	0.030003
0.3918	0.0542938	-0.0172371	0.0299672
0.392	0.0541893	-0.017226	0.0301507
0.3922	0.0542494	-0.0175384	0.0300452
0.3924	0.0541893	-0.0171563	0.0300832
0.3926	0.0545053	-0.0175077	0.0302942
0.3928	0.0545184	-0.0174993	0.030214
0.393	0.0541527	-0.0171897	0.0301929
0.3932	0.054568	-0.0177002	0.0302541
0.3934	0.0550982	-0.0173627	0.0301592
0.3936	0.0544505	-0.017159	0.0301697
0.3938	0.0547456	-0.0174519	0.0303027
0.394	0.0549702	-0.0173264	0.0300769
0.3942	0.0548031	-0.017424	0.0302225
0.3944	0.0549467	-0.0171646	0.0301528
0.3946	0.0548579	-0.0173264	0.0300326
0.3948	0.0550094	-0.0171284	0.0301212
0.395	0.0551504	-0.0174686	0.0301803
0.3952	0.05514	-0.017371	0.0301782
0.3954	0.0555083	-0.0171367	0.0301296
0.3956	0.055281	-0.0175886	0.030252
0.3958	0.0551478	-0.0171172	0.0300516
0.396	0.0553568	-0.017265	0.0301697
0.3962	0.0552915	-0.0175133	0.0301634
0.3964	0.0553411	-0.0170503	0.0301106
0.3966	0.0556362	-0.0172399	0.0302056
0.3968	0.0554665	-0.0174435	0.0299735
0.397	0.0552967	-0.0170698	0.0300073
0.3972	0.0554769	-0.0172846	0.0301128
0.3974	0.0554142	-0.0176025	0.0300769
0.3976	0.0553959	-0.0170949	0.0303216
0.3978	0.0553254	-0.0171367	0.0300895
0.398	0.0556832	-0.0173682	0.0301845
0.3982	0.0552889	-0.0173069	0.0300621
0.3984	0.0551139	-0.0169666	0.0302309
0.3986	0.0547717	-0.0172093	0.0301866
0.3988	0.0549467	-0.0170475	0.0302605
0.399	0.0549911	-0.0172427	0.0302309
0.3992	0.05514	-0.0171507	0.0302626
0.3994	0.0554064	-0.017081	0.030233
[truncated: 35,502 more rows]

## Sheet: Fig.S1G
	MCF-7
Time (sec)	ctrl	+ PAX	+ IBTX
0	0.0014447	-0.0309067	-0.00334215
0.0002	0.00130511	-0.0340225	-0.00224057
0.0004	0.001422	-0.0321093	-0.00756155
0.0006	0.00110651	-0.034427	-0.00239013
0.0008	0.00127447	-0.0321749	-0.00451852
0.001	0.00112239	-0.0344817	-0.00173148
0.0012	0.00130965	-0.0329949	-0.00683962
0.0014	0.00149236	-0.0321421	-0.00395479
0.0016	0.00115417	-0.0344598	-0.00291935
0.0018	0.00113488	-0.0316283	-0.00599977
0.002	0.00121091	-0.0336508	-0.00663254
0.0022	0.00095216	-0.0328418	-0.00125978
0.0024	0.00108494	-0.034438	-0.00374482
0.0026	0.00121205	-0.0319672	-0.00844167
0.0028	0.00103614	-0.0323389	-0.00295962
0.003	0.00125064	-0.0335415	-0.00491256
0.0032	0.00107019	-0.0330932	-0.0072049
0.0034	0.00116892	-0.0337492	-0.00254832
0.0036	0.00121545	-0.0337711	-0.00543028
0.0038	0.00097259	-0.0344052	-0.0067332
0.004	0.00103841	-0.0300758	-0.00633916
0.0042	0.00143335	-0.0314971	-0.00234986
0.0044	0.00147421	-0.0330058	-0.00989703
0.0046	0.00133121	-0.0335524	-0.00649735
0.0048	0.00121999	-0.0336727	-0.00633916
0.005	0.00109289	-0.0329511	-0.00842729
0.0052	0.00116212	-0.035739	-0.00341694
0.0054	0.00141519	-0.0362637	-0.00383974
0.0056	0.00107813	-0.035564	-0.00800161
0.0058	0.00125404	-0.0337602	-0.00509089
0.006	0.00122113	-0.0355203	-0.00570352
0.0062	0.0010997	-0.0365699	-0.00847331
0.0064	0.00140157	-0.0353891	-0.0033968
0.0066	0.00114509	-0.0374117	-0.00578693
0.0068	0.00110537	-0.0340335	-0.0086804
0.007	0.00126085	-0.0317048	-0.00402957
0.0072	0.00107246	-0.0347769	-0.00634204
0.0074	0.00114282	-0.0329621	-0.00807639
0.0076	0.0011973	-0.0334978	-0.0046422
0.0078	0.00112126	-0.0338695	-0.00591924
0.008	0.00123361	-0.0330604	-0.00864013
0.0082	0.00129036	-0.0351377	-0.00359238
0.0084	0.00123475	-0.0366573	-0.0072049
0.0086	0.00117914	-0.0332244	-0.0103486
0.0088	0.00131305	-0.0329839	-0.0035665
0.009	0.00135731	-0.0361544	-0.00909457
0.0092	0.00107359	-0.0314861	-0.00516855
0.0094	0.00130171	-0.0359467	-0.00179763
0.0096	0.00123248	-0.0348644	-0.00862575
0.0098	0.00112126	-0.0321093	-0.00669581
0.01	0.00119049	-0.036384	-0.00333928
0.0102	0.0012756	-0.0352251	-0.00908019
0.0104	0.00114509	-0.0340553	-0.00451277
0.0106	0.00140384	-0.0370946	-0.0023326
0.0108	0.00122113	-0.0348097	-0.00717326
0.011	0.00128241	-0.0326559	-0.00520306
0.0112	0.00119049	-0.0353563	-0.00178325
0.0114	0.00116779	-0.0325575	-0.0083295
0.0116	0.00110537	-0.0324482	-0.00380522
0.0118	0.00147875	-0.0362419	-0.00651749
0.012	0.00116665	-0.0337929	-0.00563449
0.0122	0.00146513	-0.0333884	-0.00611769
0.0124	0.00129944	-0.0330386	-0.00755292
0.0126	0.00140384	-0.0354657	-0.00406696
0.0128	0.0014708	-0.0343942	-0.002091
0.013	0.00125518	-0.0341974	-0.0053066
0.0132	0.00132213	-0.0320656	-0.00433732
0.0134	0.00129944	-0.0358264	-0.00369305
0.0136	0.00127901	-0.0340772	-0.00507651
0.0138	0.00166373	-0.0325575	-0.00570064
0.014	0.00145378	-0.0360669	-0.00143523
0.0142	0.00107813	-0.0359358	-0.00581857
0.0144	0.00118708	-0.0323936	-0.00446675
0.0146	0.00112353	-0.0352033	0.00058675
0.0148	0.00123475	-0.0337274	-0.00563737
0.015	0.00135845	-0.0321202	-0.00352048
0.0152	0.00120297	-0.0343068	-0.00742925
0.0154	0.00129376	-0.0312456	-0.00415037
0.0156	0.00138342	-0.0328855	-0.00083122
0.0158	0.00106792	-0.0341865	-0.00679648
0.016	0.0015457	-0.0303601	-0.00467096
0.0162	0.00123702	-0.0326013	-0.00049183
0.0164	0.00133235	-0.0310707	-0.00633629
0.0166	0.00141065	-0.0283922	-0.00318971
0.0168	0.00124496	-0.0348862	-0.00431144
0.017	0.00122794	-0.0347769	-0.00681661
0.0172	0.00149804	-0.0340991	-0.00104119
0.0174	0.00138001	-0.0342412	-0.00460769
0.0176	0.00135164	-0.0323936	-0.00597676
0.0178	0.00125744	-0.0339569	-0.00074494
0.018	0.0015423	-0.0331588	-0.00685113
0.0182	0.00147988	-0.0338039	-0.0047515
0.0184	0.00146059	-0.0328309	-0.00184365
0.0186	0.00138796	-0.0345145	-0.00847331
0.0188	0.00128582	-0.0329402	0.00018408
0.019	0.0013471	-0.0343396	-0.00237287
0.0192	0.00142541	-0.0340772	-0.00637368
0.0194	0.00117914	-0.0304257	-0.00573228
0.0196	0.00143108	-0.033782	-0.00174298
0.0198	0.00123248	-0.0325903	-0.00503336
0.02	0.00138115	-0.0316611	-0.00473999
0.0202	0.00132554	-0.0338039	-0.00506788
0.0204	0.00127787	-0.0303929	-0.00543891
0.0206	0.00143903	-0.0314096	-0.00636217
0.0208	0.00112239	-0.0323608	-0.00433157
0.021	0.00142768	-0.0330823	-0.00483491
0.0212	0.00129603	-0.0329949	-0.00402957
0.0214	0.00131532	-0.0312347	-0.00197308
0.0216	0.00149577	-0.0352798	-0.00758456
0.0218	0.00120751	-0.0309067	-0.00168546
0.022	0.00125404	-0.0337711	-0.00633916
0.0222	0.00121772	-0.0334103	-0.00342269
0.0224	0.00108494	-0.03411	-0.00366429
0.0226	0.00123248	-0.0333338	-0.00803325
0.0228	0.00117573	-0.0318251	-0.00315232
0.023	0.00110197	-0.0360997	-0.00569202
0.0232	0.00118027	-0.0327543	-0.00564887
0.0234	0.00119503	-0.031836	-0.00295674
0.0236	0.00106906	-0.0358155	-0.0102882
0.0238	0.00083527	-0.0343942	-0.00758744
0.024	0.00101345	-0.0295183	-0.00406408
0.0242	0.00143449	-0.0329949	-0.00794409
0.0244	0.00143789	-0.0336727	-0.00258859
0.0246	0.00132554	-0.0306443	-0.0077974
0.0248	0.00111672	-0.0350283	-0.0110389
0.025	0.00115077	-0.0330932	-0.0048838
0.0252	0.00127447	-0.0351486	-0.00262885
0.0254	0.00119389	-0.0342412	-0.00632478
0.0256	0.00127787	-0.0364059	-0.00570352
0.0258	0.00127787	-0.0334322	-0.00418488
0.026	0.00112466	-0.035728	-0.00790094
0.0262	0.00127447	-0.0351486	-0.00670444
0.0264	0.0013244	-0.0340881	-0.00410147
0.0266	0.00108154	-0.0397731	-0.0076277
0.0268	0.00122567	-0.0342849	-0.00242177
0.027	0.00115077	-0.02989	-0.00829498
0.0272	0.00108494	-0.0347331	-0.00774563
0.0274	0.00132894	-0.0332463	-0.00220893
0.0276	0.00131986	-0.036384	-0.00838127
0.0278	0.00097486	-0.034274	-0.00775138
0.028	0.00125971	-0.0317267	-0.0031063
0.0282	0.00123021	-0.0353235	-0.00860849
0.0284	0.00105771	-0.0347222	-0.00457605
0.0286	0.00130171	-0.0341974	-0.00444662
0.0288	0.00121659	-0.0342302	-0.00700069
0.029	0.00104409	-0.0359904	-0.00744938
0.0292	0.00128355	-0.0351814	-0.00551369
0.0294	0.00117346	-0.0360451	-0.00931029
0.0296	0.00130738	-0.036384	-0.00493557
0.0298	0.00130738	-0.0344708	-0.00390014
0.03	0.00123134	-0.0358374	-0.00855097
0.0302	0.00118027	-0.0343724	-0.00531811
0.0304	0.00147648	-0.0324482	-0.00181776
0.0306	0.00126652	-0.0379474	-0.00597676
0.0308	0.00102933	-0.0344817	-0.00692591
0.031	0.00140952	-0.0310598	-0.00155603
0.0312	0.00117006	-0.0355094	-0.00815117
0.0314	0.00130397	-0.0335634	-0.00201622
0.0316	0.00121886	-0.0347878	-0.00587034
0.0318	0.00110424	-0.0362091	-0.00785205
0.032	0.00143449	-0.034438	-0.00117637
0.0322	0.00135618	-0.0312347	-0.00819432
0.0324	0.00128128	-0.0344489	-0.0077974
0.0326	0.00136639	-0.035083	-0.00367004
0.0328	0.00131873	-0.0324264	-0.00460193
0.033	0.00125971	-0.0348425	-0.00530085
0.0332	0.00138342	-0.0331807	-0.00176887
0.0334	0.00145945	-0.0334322	-0.00327888
0.0336	0.00142087	-0.0342631	-0.00692303
0.0338	0.00133235	-0.0327325	0.00079671
0.034	0.00147534	-0.0351158	-0.00729694
0.0342	0.00112807	-0.0338476	-0.00551081
0.0344	0.00101799	-0.0315408	-0.00119363
0.0346	0.00122453	-0.0353235	-0.00698631
0.0348	0.00135731	-0.0343505	0.0010642
0.035	0.00126425	-0.0308848	-0.0072049
0.0352	0.00123475	-0.0338148	-0.00528359
0.0354	0.00125177	-0.0317923	-0.00539577
0.0356	0.0012756	-0.0319453	-0.00399218
0.0358	0.00133575	-0.0333228	-0.00693741
0.036	0.00143903	-0.0301852	-0.00218879
0.0362	0.00130511	-0.0341537	-0.00839277
0.0364	0.0014708	-0.0296276	-0.00268638
0.0366	0.00129376	-0.0304585	-0.00459906
0.0368	0.00130057	-0.0316064	-0.00501611
0.037	0.00140838	-0.0364496	-0.00484929
0.0372	0.00126879	-0.0323717	-0.00195582
0.0374	0.00140384	-0.032328	-0.00553958
0.0376	0.00144583	-0.0323826	-0.00511677
0.0378	0.00119616	-0.0312347	-0.00159342
0.038	0.00160358	-0.034919	-0.00736884
0.0382	0.00141633	-0.0329183	-0.00191843
0.0384	0.00118027	-0.0314643	-0.00486079
0.0386	0.00145945	-0.0348862	-0.00465658
0.0388	0.00126085	-0.0305131	0.00099517
0.039	0.00126198	-0.0340881	-0.00304303
0.0392	0.00135958	-0.0312456	-0.00635642
0.0394	0.00131873	-0.0315408	-0.00646572
0.0396	0.0014708	-0.0347222	-0.00084561
0.0398	0.00106111	-0.0323498	-0.00683962
0.04	0.00147307	-0.0312566	-0.00020709
0.0402	0.00122453	-0.0334322	-0.00673896
0.0404	0.00138115	-0.0321749	-0.0037592
0.0406	0.00129263	-0.032328	-0.00542165
0.0408	0.00128355	-0.032481	-0.00446387
0.041	0.00121999	-0.0327981	-0.00228946
0.0412	0.00124723	-0.0319672	-0.00459618
0.0414	0.00147988	-0.0326341	-0.00399505
0.0416	0.00126652	-0.0348316	-0.00253969
0.0418	0.00124723	-0.0304475	-0.00660377
0.042	0.00140725	-0.0336399	-0.00727681
0.0422	0.00116665	-0.0315299	0.0008945
0.0424	0.0012007	-0.0332791	-0.00712437
0.0426	0.00126312	-0.033618	-0.0058991
0.0428	0.0011485	-0.0316064	-0.00431431
0.043	0.00113601	-0.0340553	-0.00831799
0.0432	0.00131873	-0.0321202	-0.0051139
0.0434	0.00106792	-0.0319344	-0.00486942
0.0436	0.0012495	-0.0343396	-0.0071934
0.0438	0.0010021	-0.0319016	-0.00426829
0.044	0.00093741	-0.0283922	-0.00554245
0.0442	0.0015423	-0.0329949	-0.00608606
0.0444	0.00133462	-0.0332135	-0.00446387
0.0446	0.00129036	-0.0326122	-0.0063104
0.0448	0.00126198	-0.0343287	-0.00870053
0.045	0.00115758	-0.032645	-0.00599689
0.0452	0.00131192	-0.0352361	-0.00370456
0.0454	0.00133916	-0.0364387	-0.00609181
0.0456	0.00108835	-0.0347659	-0.00214277
0.0458	0.00128014	-0.0340881	-0.00957777
0.046	0.00137774	-0.0350502	-0.00522032
0.0462	0.00111105	-0.0355422	-0.00388863
0.0464	0.00135845	-0.0354875	-0.00733433
0.0466	0.00127674	-0.0376959	-0.0066009
0.0468	0.0010316	-0.0327106	-0.00286758
0.047	0.00120297	-0.033301	-0.0109066
0.0472	0.00126425	-0.0332572	-0.00462782
0.0474	0.00106225	-0.0347331	-0.00533824
0.0476	0.00111785	-0.0328527	-0.0094541
0.0478	0.00124042	-0.0354438	-0.00166532
0.048	0.00103841	-0.0315408	-0.00501898
0.0482	0.00116098	-0.0351049	-0.00850782
0.0484	0.0012461	-0.0338695	-0.00357225
0.0486	0.00114509	-0.0328637	-0.00871779
0.0488	0.00131192	-0.0361544	-0.00655488
0.049	0.00118027	-0.0328637	-0.00318684
0.0492	0.00118254	-0.0346129	-0.00836401
0.0494	0.00139023	-0.0349627	-0.00647722
0.0496	0.00114055	-0.0314861	-0.00327025
0.0498	0.00120524	-0.0354547	-0.0101501
0.05	0.0013925	-0.0356624	-0.00559422
0.0502	0.0012495	-0.0322624	-0.00294811
0.0504	0.00128695	-0.0352689	-0.00851358
0.0506	0.00133008	-0.0357608	-0.00468822
0.0508	0.00127106	-0.0330386	-0.00291647
0.051	0.00138682	-0.0359576	-0.00811091
0.0512	0.00118481	-0.0353891	-0.00467671
0.0514	0.00126312	-0.0331151	-0.00350322
0.0516	0.00125518	-0.0356406	-0.00739185
0.0518	0.00128582	-0.0357171	-0.00196445
0.052	0.00133008	-0.0333775	-0.0052951
0.0522	0.00126085	-0.033782	-0.00781466
0.0524	0.00130965	-0.0334431	-0.00349172
0.0526	0.0014969	-0.0333884	-0.00508801
0.0528	0.0013471	-0.0351595	-0.0033249
0.053	0.00136639	-0.0342412	-0.00536988
0.0532	0.00143789	-0.032317	-0.00670444
0.0534	0.00128014	-0.0352579	-0.00142948
0.0536	0.00138682	-0.033126	-0.00353774
0.0538	0.00156954	-0.0338695	-0.00324724
0.054	0.00148669	-0.0341428	-0.00264036
0.0542	0.00124837	-0.0340553	-0.00558847
0.0544	0.0011746	-0.0329183	-0.00211977
0.0546	0.0012495	-0.0341865	-0.00265474
0.0548	0.00137434	-0.0338148	-0.00176887
0.055	0.00122113	-0.0327434	-0.00395191
0.0552	0.00115304	-0.0346238	-0.00598827
0.0554	0.00150258	-0.0309177	-0.00738898
0.0556	0.00122226	-0.0321749	-0.00013806
0.0558	0.00122226	-0.032645	-0.00682237
0.056	0.00127901	-0.0316501	-0.00359814
0.0562	0.00126539	-0.0327325	-0.00362115
0.0564	0.00148329	-0.0320437	-0.00621836
0.0566	0.00138342	-0.0274739	-0.00537851
0.0568	0.00119957	-0.0332682	-0.00138633
0.057	0.00140611	-0.0342959	-0.00775138
0.0572	0.00134597	-0.0352361	-0.00542453
0.0574	0.0012983	-0.0360451	-0.00107283
0.0576	0.00147988	-0.0316392	-0.00638806
0.0578	0.00120865	-0.0335306	-0.00302577
0.058	0.00155705	-0.0323389	-0.00465658
0.0582	0.00132554	-0.0308192	-0.00589335
0.0584	0.00118141	-0.0339788	0.00050334
0.0586	0.00142314	-0.032	-0.00510815
0.0588	0.00150031	-0.0325466	-0.00422515
0.059	0.00117914	-0.0343833	-0.00130292
0.0592	0.00134143	-0.0317595	-0.00733721
0.0594	0.00130965	-0.0329074	-0.00616084
0.0596	0.00121886	-0.0324919	-0.00109584
0.0598	0.0013505	-0.0330058	-0.00622987
0.06	0.00140952	-0.0333884	-0.00121951
0.0602	0.00121886	-0.0315189	-0.00798148
0.0604	0.00140838	-0.0330604	-0.00251956
0.0606	0.00120184	-0.0310488	-0.00610907
0.0608	0.00130397	-0.0318797	-0.00389151
0.061	0.00134597	-0.0340991	-0.00170272
0.0612	0.00128468	-0.0346457	-0.00740911
0.0614	0.0013993	-0.0310707	-0.00425966
0.0616	0.00127333	-0.0345364	-0.00254257
0.0618	0.00124837	-0.0326887	-0.00809653
0.062	0.00107246	-0.0339788	-0.00416763
0.0622	0.00129717	-0.0322296	-0.00239301
0.0624	0.00131986	-0.034438	-0.00581569
0.0626	0.00109402	-0.0316283	-0.00267775
0.0628	0.00130738	-0.031016	-0.00485504
0.063	0.00128922	-0.0323826	-0.00515992
0.0632	0.00122567	-0.0312456	-0.00266624
0.0634	0.00112466	-0.0323608	-0.00672745
0.0636	0.0013437	-0.033782	-0.00448976
0.0638	0.00099415	-0.0332791	-0.00556834
0.064	0.00107813	-0.0319234	-0.00637943
0.0642	0.0013698	-0.0330604	-0.00639381
0.0644	0.00132894	-0.0320984	-0.00339105
0.0646	0.00125177	-0.0330932	-0.00803613
0.0648	0.00134824	-0.0343724	-0.00522607
0.065	0.00128922	-0.0342521	-0.0063104
0.0652	0.00130057	-0.0340444	-0.00555683
0.0654	0.00132667	-0.035411	-0.00585884
0.0656	0.00120411	-0.0327653	-0.00456167
0.0658	0.00123361	-0.036384	-0.00672745
0.066	0.00126312	-0.0335962	-0.00274678
0.0662	0.00104522	-0.0332682	-0.00522032
0.0664	0.00121772	-0.0353235	-0.0078463
0.0666	0.00122907	-0.0372695	-0.00222618
0.0668	0.0009567	-0.0341428	-0.00875518
0.067	0.00136072	-0.0319125	-0.00648585
0.0672	0.00116325	-0.0334759	-0.00300851
0.0674	0.00108721	-0.0359139	-0.00983088
0.0676	0.00126539	-0.033782	-0.00635354
0.0678	0.00108948	-0.0332026	-0.003276
0.068	0.00110651	-0.0335743	-0.00838415
0.0682	0.00131305	-0.0353235	-0.00726243
0.0684	0.00120638	-0.0318469	-0.00310918
0.0686	0.00111105	-0.0339788	-0.0102163
0.0688	0.00129603	-0.0332572	-0.00625575
0.069	0.00123248	-0.0314205	-0.00352335
0.0692	0.00114055	-0.0357827	-0.00860274
0.0694	0.00127447	-0.0350065	-0.00499022
0.0696	0.00118368	-0.0318907	-0.00405833
0.0698	0.00126198	-0.0342959	-0.00491832
0.07	0.00134824	-0.0354438	-0.00613495
0.0702	0.00115077	-0.0330495	-0.00425679
0.0704	0.00134483	-0.0366026	-0.0064916
0.0706	0.0013244	-0.0331042	-0.00430568
0.0708	0.0012234	-0.0333884	-0.00403532
0.071	0.00143108	-0.0348534	-0.00902266
0.0712	0.00129263	-0.034755	-0.00416763
0.0714	0.00091131	-0.0322077	-0.00173435
0.0716	0.00133802	-0.0375538	-0.00619535
0.0718	0.00126993	-0.0334322	-0.00468247
0.072	0.00114169	-0.0329293	-0.00364703
0.0722	0.00132894	-0.0341974	-0.00919811
0.0724	0.00138569	-0.0328965	-0.00320697
0.0726	0.0012983	-0.0330714	-0.00495858
0.0728	0.00148442	-0.0350502	-0.00574379
0.073	0.00122453	-0.0323936	-0.00242464
0.0732	0.00131532	-0.0343942	-0.00738035
0.0734	0.00152641	-0.0346676	-0.00284457
0.0736	0.00130397	-0.0319562	-0.00326737
0.0738	0.00155932	-0.0330058	-0.00645996
0.074	0.00139703	-0.034427	-0.00138058
0.0742	0.00125404	-0.0344161	-0.00444662
0.0744	0.0008784	-0.0329183	-0.00587322
0.0746	0.00128695	-0.0337274	0.00050334
0.0748	0.00121205	-0.0325029	-0.00309192
0.075	0.00135845	-0.0331151	-0.00593074
0.0752	0.00128582	-0.0320437	-0.00373044
0.0754	0.00114509	-0.0320218	-0.00503049
0.0756	0.00141065	-0.0328637	-0.00391452
0.0758	0.00125064	-0.0321312	-0.00249367
0.076	0.00124269	-0.0316392	-0.00551081
0.0762	0.00144924	-0.0329839	-0.00249942
0.0764	0.00126425	-0.0294089	-0.00365278
0.0766	0.00149009	-0.0294636	-0.00614646
0.0768	0.0012495	-0.0345473	0.0002905
0.077	0.0011973	-0.0355422	-0.00695179
0.0772	0.00153095	-0.0348425	-0.00444662
0.0774	0.00124269	-0.0344817	-0.0010642
0.0776	0.00128695	-0.0305787	-0.00587322
0.0778	0.00139023	-0.0343833	-0.00437184
0.078	0.00145151	-0.0309067	-0.0016078
0.0782	0.001422	-0.0333556	-0.00834963
0.0784	0.00117687	-0.0334103	-0.00132881
0.0786	0.00138909	-0.0326013	-0.00496146
0.0788	0.00132554	-0.0324592	-0.00551369
0.079	0.00127447	-0.0329293	-0.00199034
0.0792	0.00138796	-0.0311691	-0.00674183
0.0794	0.00113147	-0.0322296	-0.00785492
0.0796	0.00133235	-0.0307755	0.00114185
0.0798	0.00117573	-0.0322514	-0.00621261
0.08	0.00130397	-0.0333447	-0.00368155
0.0802	0.00131759	-0.0317485	-0.00433445
0.0804	0.00124383	-0.0328855	-0.00322998
0.0806	0.0013471	-0.0305131	-0.00803613
0.0808	0.00129149	-0.0333994	-0.00412448
0.081	0.00132667	-0.0320546	-0.00191555
0.0812	0.00136526	-0.033618	-0.00774563
0.0814	0.00144356	-0.0317813	-0.00203348
0.0816	0.00137207	-0.0343942	-0.00569489
0.0818	0.00138001	-0.0312894	-0.00812529
0.082	0.00119843	-0.0337929	-0.00258571
0.0822	0.00123815	-0.0335524	-0.00617234
0.0824	0.00131078	-0.0334978	-0.00420789
0.0826	0.00112126	-0.0331479	-0.00457892
0.0828	0.00114963	-0.031672	-0.00769098
0.083	0.00127447	-0.0335415	-0.00352335
0.0832	0.00113715	-0.0322514	-0.00705534
0.0834	0.00118368	-0.0335087	-0.00669581
0.0836	0.00126312	-0.0347878	-0.0029136
0.0838	0.00092152	-0.0312019	-0.00867752
0.084	0.00093173	-0.0310488	-0.00541302
0.0842	0.00138909	-0.0333338	-0.00418201
0.0844	0.0012949	-0.0333556	-0.00893925
0.0846	0.00124383	-0.0341319	-0.00734008
0.0848	0.00124837	-0.032973	-0.00634779
0.085	0.00125971	-0.0322624	-0.00715888
0.0852	0.00129944	-0.0358046	-0.00218304
0.0854	0.00125177	-0.0333556	-0.00500173
0.0856	0.00113601	-0.0353782	-0.00771687
0.0858	0.0013437	-0.0351814	-0.00481477
0.086	0.00115304	-0.0335415	-0.00480902
0.0862	0.00118708	-0.0352579	-0.0060084
0.0864	0.0013993	-0.0350721	-0.00218592
0.0866	0.00101572	-0.0372149	-0.00540152
0.0868	0.00116552	-0.0350611	-0.00727393
0.087	0.00130624	-0.0301305	-0.00154452
0.0872	0.00115985	-0.0307755	-0.00994017
0.0874	0.00111105	-0.0340007	-0.00597388
0.0876	0.00128128	-0.0349299	-0.00449551
0.0878	0.00105771	-0.0347441	-0.00758168
0.088	0.00118254	-0.034274	-0.00543316
0.0882	0.001321	-0.034591	-0.00378221
0.0884	0.00112012	-0.0326778	-0.00879832
0.0886	0.00121886	-0.0352142	-0.00629027
0.0888	0.00135164	-0.0328965	-0.00295099
0.089	0.00106225	-0.0347113	-0.00792683
0.0892	0.00134937	-0.0361981	-0.00597388
0.0894	0.00135618	-0.0355531	-0.00266912
0.0896	0.00108608	-0.0322296	-0.00664692
0.0898	0.00132327	-0.0356734	-0.00726818
0.09	0.00133689	-0.0338148	-0.00242177
0.0902	0.00109402	-0.0355859	-0.006854
0.0904	0.00134483	-0.0355859	-0.00599402
0.0906	0.00137434	-0.0341428	-0.00211401
0.0908	0.00126766	-0.0355422	-0.00889611
0.091	0.00130624	-0.0348534	-0.00577255
0.0912	0.00116552	-0.0332791	-0.00216003
0.0914	0.00119389	-0.0365043	-0.00747526
0.0916	0.00118368	-0.0349299	-0.00138633
0.0918	0.00123021	-0.0329074	-0.0064801
0.092	0.00145718	-0.0335524	-0.00914922
0.0922	0.0013732	-0.0343833	-0.00179188
0.0924	0.00123021	-0.0334978	-0.00687414
0.0926	0.00153889	-0.0334431	-0.00618097
0.0928	0.00133348	-0.0348316	-0.00202773
0.093	0.00143676	-0.0315736	-0.0045818
0.0932	0.00136753	-0.0347441	-0.00409572
0.0934	0.00144583	-0.0338804	-0.00302002
0.0936	0.00122226	-0.03329	-0.00577255
0.0938	0.00152641	-0.0352251	-0.00037103
0.094	0.00141973	-0.033946	-0.00629027
0.0942	0.00132213	-0.0347988	-0.00345433
0.0944	0.00099983	-0.0353673	-0.00356362
0.0946	0.00134937	-0.0307209	-0.00570927
0.0948	0.00136072	-0.0324482	-0.00011217
0.095	0.00131759	-0.032973	-0.0067217
0.0952	0.00123134	-0.0302726	-0.0064916
0.0954	0.0013925	-0.0324045	-0.00681949
0.0956	0.00123588	-0.0315408	-0.00052635
0.0958	0.00128695	-0.0313877	-0.00687414
0.096	0.00140725	-0.032153	-0.00334215
0.0962	0.0012495	-0.0335196	-0.0063104
0.0964	0.00135391	-0.0287639	-0.00409572
0.0966	0.00123021	-0.0306881	-0.00096353
0.0968	0.00124383	-0.0337602	-0.008922
0.097	0.00147421	-0.0346129	-0.00204786
0.0972	0.00126425	-0.0350611	-0.00453003
0.0974	0.00121772	-0.0331042	-0.00253969
0.0976	0.00141973	-0.0325903	-0.00056661
0.0978	0.00130284	-0.0348316	-0.00654625
0.098	0.00158769	-0.0334431	-0.00237287
0.0982	0.00137774	-0.0329293	-0.00566038
0.0984	0.00128468	-0.0340881	-0.00423953
0.0986	0.00145718	-0.0309614	0.00048896
0.0988	0.00142995	-0.0330714	-0.00329613
0.099	0.00121999	-0.0335743	-0.00365278
0.0992	0.001422	-0.0308302	-0.00685113
0.0994	0.00120524	-0.0324373	-0.00398355
0.0996	0.00140952	-0.0346238	-0.00286183
0.0998	0.00122226	-0.0327981	-0.00809653
0.1	0.00318787	-0.034438	0.00672745
0.1002	0.00228564	-0.0965029	-0.0145651
0.1004	-0.00322646	-0.0860184	-0.0223827
0.1006	-0.0036021	-0.070986	-0.0191498
0.1008	-0.00368041	-0.0639453	-0.0128682
0.101	-0.00361799	-0.0585446	-0.0127704
0.1012	-0.00320036	-0.0582056	-0.0139381
0.1014	-0.00313567	-0.0510119	-0.00819144
0.1016	-0.00290415	-0.0523785	-0.0146255
0.1018	-0.00293139	-0.0475681	-0.0116745
0.102	-0.00297678	-0.0466717	-0.00823458
0.1022	-0.0026681	-0.0475463	-0.0128365
0.1024	-0.0028145	-0.0490659	-0.0099488
0.1026	-0.00264654	-0.0476119	-0.0114761
0.1028	-0.00263178	-0.0446382	-0.0118241
0.103	-0.0025444	-0.0468575	-0.0086919
0.1032	-0.0023492	-0.0448896	-0.012894
0.1034	-0.00219372	-0.0442774	-0.0109468
0.1036	-0.00228451	-0.0453816	-0.010478
0.1038	-0.00204165	-0.0432606	-0.00741199
0.104	-0.00229699	-0.044671	-0.0132162
0.1042	-0.00189411	-0.0429873	-0.00820582
0.1044	-0.00153209	-0.0443867	-0.00893063
0.1046	-0.00170799	-0.0476775	-0.0132248
0.1048	-0.00179424	-0.0446382	-0.00887598
0.105	-0.0015457	-0.0448131	-0.0106276
0.1052	-0.00148215	-0.0457205	-0.00940232
0.1054	-0.00155138	-0.0447694	-0.00887023
0.1056	-0.00125404	-0.0459392	-0.0103285
0.1058	-0.00136526	-0.0467591	-0.0104809
0.106	-0.00130511	-0.0437089	-0.00698343
0.1062	-0.00093514	-0.0478961	-0.0129027
0.1064	-0.00117346	-0.0473495	-0.00928728
0.1066	-0.00108608	-0.0466826	-0.00662103
0.1068	-0.00091358	-0.0466279	-0.0129372
0.107	-0.00094649	-0.0401886	-0.0091032
0.1072	-0.00089769	-0.0436761	-0.0076881
0.1074	-0.00073086	-0.0453379	-0.0116084
0.1076	-0.00087726	-0.042397	-0.00581857
0.1078	-0.00053226	-0.0435449	-0.00948573
0.108	-0.00055609	-0.0459282	-0.0114502
0.1082	-0.00050502	-0.044179	-0.00867464
0.1084	-0.00037564	-0.0414786	-0.00904855
0.1086	-0.00025308	-0.0447803	-0.0118759
0.1088	-0.00044941	-0.0418066	-0.00539001
0.109	-0.00027918	-0.0436542	-0.00908882
0.1092	-6.3553e-05	-0.0445507	-0.0115998
0.1094	-0.00013959	-0.0426156	-0.00581569
0.1096	-7.1497e-05	-0.0439713	-0.00816843
0.1098	0.00018158	-0.0454581	-0.0108606
0.11	-0.000101	-0.041096	-0.00593074
0.1102	0.00012824	-0.0443758	-0.00929303
0.1104	0.00035408	-0.0445398	-0.0102853
0.1106	6.4688e-05	-0.0413146	-0.005948
0.1108	0.00031777	-0.0439822	-0.00770824
0.111	0.00018385	-0.0438291	-0.0105183
0.1112	0.00034727	-0.0421674	-0.00605729
0.1114	0.00048119	-0.0425282	-0.00821157
0.1116	0.00024286	-0.0430529	-0.00820582
0.1118	0.00057084	-0.0426921	-0.0064197
0.112	0.00067525	-0.0406368	-0.0111137
0.1122	0.00065482	-0.0437417	-0.00522607
0.1124	0.00070362	-0.0418175	-0.00960078
0.1126	0.00084662	-0.0423314	-0.00712437
0.1128	0.00094195	-0.042222	-0.00844167
0.113	0.00094876	-0.0402104	-0.00213415
0.1132	0.00095216	-0.0412818	-0.00725667
0.1134	0.00081938	-0.0443976	-0.0038685
0.1136	0.00117233	-0.0402651	-0.00536413
0.1138	0.0011746	-0.0436105	-0.00855097
0.114	0.00130851	-0.04337	-0.00233548
0.1142	0.00110878	-0.0421236	-0.00971583
0.1144	0.00068093	-0.0417301	-0.00569777
0.1146	0.00101458	-0.0416645	-0.00308042
0.1148	0.00118708	-0.0373023	-0.0058272
0.115	0.00136299	-0.0423314	-0.00302289
0.1152	0.00121432	-0.0404509	-0.00944259
0.1154	0.00128922	-0.0380676	-0.00722503
0.1156	0.00136753	-0.0424735	-0.00278992
0.1158	0.00134029	-0.0376631	-0.0079182
0.116	0.00165238	-0.0411834	-0.00580419
0.1162	0.00145037	-0.0389532	-0.00664979
0.1164	0.00164671	-0.0369416	-0.00676484
0.1166	0.00166146	-0.0382316	-0.00268925
0.1168	0.00156386	-0.0380458	-0.00835251
0.117	0.0017148	-0.0439166	-0.00539001
0.1172	0.00160472	-0.0394123	-0.0061896
0.1174	0.00169097	-0.0416645	-0.00458755
0.1176	0.00192702	-0.040287	-0.00825184
0.1178	0.00181354	-0.0407461	-0.00347158
0.118	0.00187822	-0.0390516	-0.00846756
0.1182	0.00194632	-0.0387017	-0.00591924
0.1184	0.00184418	-0.0403307	-0.00233548
0.1186	0.00197809	-0.0383519	-0.00993442
0.1188	0.00199058	-0.0404181	-0.00126266
0.119	0.00192702	-0.0379255	-0.00619535
0.1192	0.00229245	-0.039959	-0.00975035
0.1194	0.00203143	-0.0391828	-0.00759607
0.1196	0.00214719	-0.0384612	-0.0008226
0.1198	0.00201781	-0.0416973	-0.00816268
0.12	0.002255	-0.0369416	-0.00401806
0.1202	0.00220847	-0.0386799	-0.00652036
0.1204	0.00224933	-0.0399808	-0.00742349
0.1206	0.00212676	-0.0365043	-0.00393178
0.1208	0.00234012	-0.0374226	-0.00924701
0.121	0.00223911	-0.0371274	-0.00280143
0.1212	0.0023753	-0.0410522	-0.00947135
0.1214	0.00253759	-0.0366901	-0.00400368
0.1216	0.00229245	-0.0403198	-0.00931891
0.1218	0.00242183	-0.0395545	-0.00530085
0.122	0.00241048	-0.0394889	-0.00604291
0.1222	0.0023299	-0.0376522	-0.00625
0.1224	0.00238438	-0.0408773	-0.00404107
0.1226	0.00253986	-0.0385705	-0.00805051
0.1228	0.00238211	-0.0377724	-0.00687989
0.123	0.00244453	-0.0378927	-0.00413599
0.1232	0.00258071	-0.0363621	-0.00923263
0.1234	0.00245361	-0.0408555	-0.00780603
0.1236	0.00267604	-0.0389313	-0.00585596
0.1238	0.00260001	-0.0378271	-0.00967844
0.124	0.00225046	-0.0375538	-0.00849057
0.1242	0.00280769	-0.0374554	-0.00542165
0.1244	0.00314815	-0.0368541	-0.0102652
0.1246	0.00280428	-0.0397403	-0.00557409
0.1248	0.0028406	-0.0394779	-0.00844455
0.125	0.00289507	-0.0373351	-0.00773125
0.1252	0.00275548	-0.0414677	-0.0029855
0.1254	0.00290302	-0.0401011	-0.00585021
0.1256	0.00295636	-0.0353126	-0.00770536
0.1258	0.00289961	-0.0415114	-0.00492407
0.126	0.00294501	-0.0400027	-0.00782041
0.1262	0.00288032	-0.0373789	-0.00718477
0.1264	0.00292912	-0.0411397	-0.00238438
0.1266	0.00312205	-0.0424298	-0.00908306
0.1268	0.00294614	-0.0403744	-0.0076766
0.127	0.00285762	-0.038811	-0.00331052
0.1272	0.00316064	-0.0374007	-0.00773125
0.1274	0.00296317	-0.0390406	-0.00612345
0.1276	0.00304715	-0.0389969	-0.00322998
0.1278	0.00324235	-0.0377396	-0.00860561
0.128	0.00300629	-0.0398387	-0.00442936
0.1282	0.00321284	-0.03915	-0.00465658
0.1284	0.00339555	-0.0367776	-0.00757881
0.1286	0.00307779	-0.04044	-0.00352335
0.1288	0.00335356	-0.0397513	-0.00565462
0.129	0.00353061	-0.036701	-0.00662391
0.1292	0.00322646	-0.0409648	-0.00163656
0.1294	0.00340577	-0.0408008	-0.00558847
0.1296	0.0035533	-0.0359795	-0.00735159
0.1298	0.00343301	-0.0399043	-0.00161643
0.13	0.00345116	-0.0382426	-0.00555108
0.1302	0.00340463	-0.0371384	-0.00835251
0.1304	0.00345911	-0.0383081	-0.00322423
0.1306	0.00357033	-0.0364496	-0.00310343
0.1308	0.0033774	-0.0388876	-0.00776576
0.131	0.00361799	-0.0403526	-0.00272952
0.1312	0.00373942	-0.0369525	-0.00491256
0.1314	0.0034557	-0.0368432	-0.00503336
0.1316	0.00364636	-0.0399699	-0.00324724
0.1318	0.0037224	-0.0362091	-0.00647147
0.132	0.00371105	-0.036548	-0.00408709
0.1322	0.00371446	-0.0382753	-0.00432869
0.1324	0.00378368	-0.0378818	-0.00576104
0.1326	0.00373148	-0.0384065	-0.00245341
0.1328	0.00383816	-0.0386908	-0.00448401
0.133	0.00404471	-0.0357062	-0.00639093
0.1332	0.00368949	-0.037193	-0.00041993
0.1334	0.00393462	-0.0398497	-0.00689427
0.1336	0.00383702	-0.0365589	-0.00367292
0.1338	0.00390965	-0.037521	0.00108721
0.134	0.00418997	-0.0376194	-0.00599402
0.1342	0.00374623	-0.0379036	-0.00182639
0.1344	0.00369176	-0.0382426	-0.00413023
0.1346	0.00388015	-0.0353673	-0.0035061
0.1348	0.00385518	-0.0371056	0.00028762
0.135	0.00407535	-0.0374991	-0.00501898
0.1352	0.00396413	-0.0363512	-0.00653187
0.1354	0.00398683	-0.0351595	-0.00469397
0.1356	0.00402428	-0.0368541	-0.0020191
0.1358	0.00413096	-0.0342959	-0.00704096
0.136	0.00399931	-0.0368432	-0.00128279
0.1362	0.00408329	-0.0334212	-0.00551081
0.1364	0.00391873	-0.0368978	-0.00252819
0.1366	0.00415138	-0.0311582	-0.00079096
0.1368	0.00426147	-0.0366245	-0.00572653
0.137	0.00404244	-0.0390078	-0.0005925
0.1372	0.00422402	-0.0381442	-0.00521457
0.1374	0.00412301	-0.0356406	-0.0013777
0.1376	0.00424331	-0.0340007	-0.00395766
0.1378	0.00423536	-0.0389532	-0.00753566
0.138	0.00425579	-0.0347988	-0.00211114
0.1382	0.0043341	-0.0370509	-0.0045329
0.1384	0.00423763	-0.0376959	-0.00472273
0.1386	0.00437155	-0.032973	-0.00141222
0.1388	0.00423083	-0.0358155	-0.00591348
0.139	0.00420472	-0.035739	-0.00168833
0.1392	0.00439652	-0.0330604	-0.00483203
0.1394	0.00425239	-0.0364387	-0.00693454
0.1396	0.00430119	-0.0358264	-0.00141509
0.1398	0.00439311	-0.0341209	-0.00576967
0.14	0.00433183	-0.0356734	-0.00354061
0.1402	0.00439311	-0.033137	-0.00144673
0.1404	0.00414571	-0.0362309	-0.00514841
0.1406	0.00448277	-0.0347988	-0.00581857
0.1408	0.00438063	-0.0337055	-0.00476875
0.141	0.00437382	-0.036384	-0.00169121
0.1412	0.00439879	-0.0341865	-0.00563737
0.1414	0.00466548	-0.0339132	-0.0025512
0.1416	0.00439425	-0.0364715	-0.00015819
0.1418	0.00442829	-0.0341428	-0.00553095
0.142	0.0045066	-0.0360451	-0.00308042
0.1422	0.00427849	-0.0366573	-0.00565462
0.1424	0.00451114	-0.0350393	-0.00357225
0.1426	0.00441014	-0.0372477	-0.00227796
0.1428	0.0043829	-0.0345692	-0.00632766
0.143	0.00449866	-0.0350283	-0.00542165
0.1432	0.00445326	-0.0344708	-0.00398355
0.1434	0.00442943	-0.0341209	-0.00539289
0.1436	0.00445553	-0.0356624	-0.00362402
0.1438	0.00435226	-0.0353782	-0.00235849
0.144	0.0043602	-0.0340116	-0.00605154
0.1442	0.0045554	-0.0357171	-0.00248217
0.1444	0.00480167	-0.0333994	-0.00626726
0.1446	0.00470293	-0.0365917	-0.0063708
0.1448	0.00471088	-0.0359139	-0.00412448
0.145	0.00443851	-0.0352579	-0.00649735
0.1452	0.00469499	-0.0374117	-0.0010642
0.1454	0.00474492	-0.0373679	-0.00287908
0.1456	0.00463711	-0.0368978	-0.00356075
0.1458	0.00480621	-0.0366026	-0.00633341
0.146	0.00473244	-0.034427	-0.00255983
0.1462	0.00453611	-0.0366136	-0.00429418
0.1464	0.00468818	-0.0396419	-0.00514266
0.1466	0.00467002	-0.0383409	-0.00243902
0.1468	0.00460647	-0.0372586	-0.00547055
0.147	0.00471542	-0.0333119	-0.00479464
0.1472	0.00460307	-0.0339351	-0.00120513
0.1474	0.0047506	-0.0351814	-0.00683962
0.1476	0.00479032	-0.0363949	-0.00341981
0.1478	0.00464279	-0.03411	-0.00336229
0.148	0.00465413	-0.0362637	-0.00710999
0.1482	0.00479372	-0.036548	-0.00269788
0.1484	0.00477443	-0.0335524	-0.00231247
0.1486	0.00479599	-0.0354984	-0.00587609
0.1488	0.0050173	-0.0357608	-0.00223481
0.149	0.00488678	-0.0339132	-0.00246203
0.1492	0.00480167	-0.0373789	-0.00515416
0.1494	0.00498211	-0.0362091	-0.00251381
0.1496	0.00482096	-0.0365152	-0.00214277
0.1498	0.00487771	-0.0372477	-0.00699206
0.15	0.00494239	-0.0339679	-0.00039692
0.1502	0.00494239	-0.0361872	-0.00287908
0.1504	0.00486182	-0.0373679	-0.00617809
0.1506	0.00492764	-0.0350174	-0.00342844
0.1508	0.00493331	-0.0382426	-0.00095202
0.151	0.00502978	-0.0371384	-0.00583007
0.1512	0.0049458	-0.0331151	-0.00253106
0.1514	0.00485955	-0.0359139	-9.2039e-05
0.1516	0.00503432	-0.035728	-0.00538714
0.1518	0.00512624	-0.0336617	-0.00190405
0.152	0.00492197	-0.0363512	-0.00124827
0.1522	0.00525902	-0.0362747	-0.00612345
0.1524	0.00507404	-0.0332026	-0.00064139
0.1526	0.00520342	-0.0356515	-0.0054648
0.1528	0.00516823	-0.0360014	-0.00125978
0.153	0.00511716	-0.033137	-0.00033076
0.1532	0.00517504	-0.0353563	-0.00316958
0.1534	0.00523179	-0.0366026	-0.00399793
0.1536	0.0051898	-0.033137	0.00092039
0.1538	0.0053884	-0.0361981	-0.00489818
0.154	0.00541223	-0.0352798	-0.00085711
0.1542	0.00516596	-0.03622	-0.00084561
0.1544	0.00483572	-0.0359904	-0.0044121
0.1546	0.00523746	-0.0326887	-0.00055798
0.1548	0.00497757	-0.0342193	0.00196157
0.155	0.00530102	-0.0322077	-0.004461
0.1552	0.00511036	-0.0357062	-0.00292223
0.1554	0.00518185	-0.0315845	-0.00266049
0.1556	0.0053884	-0.0337164	-0.00290785
0.1558	0.00523406	-0.0329293	0.00073631
0.156	0.00514213	-0.0339351	-0.00294811
0.1562	0.00534755	-0.0334212	-0.00318684
0.1564	0.00534528	-0.0315408	-3.1638e-05
0.1566	0.00529307	-0.0311472	-0.004159
0.1568	0.00527832	-0.0329293	-0.00255695
0.157	0.00524087	-0.0363512	0.00027324
0.1572	0.00536457	-0.0347441	-0.00369593
0.1574	0.0050729	-0.034427	-0.0030459
0.1576	0.00529875	-0.0313877	0.0015359
0.1578	0.00533166	-0.0358483	-0.0045818
0.158	0.00528059	-0.0354329	0.00112747
0.1582	0.00537932	-0.0331151	-0.00423953
0.1584	0.00528059	-0.0339897	-0.00366717
0.1586	0.00519661	-0.0323717	0.00157041
0.1588	0.00545536	-0.0325575	-0.00130867
0.159	0.00531236	-0.0348972	-0.0018494
0.1592	0.00542926	-0.0319125	-0.00365566
0.1594	0.00527264	-0.0334212	-0.00014669
0.1596	0.00540429	-0.0356952	-0.00267775
0.1598	0.00533166	-0.0314424	-0.00663829
0.16	0.00560516	-0.0337164	0.00031926
0.1602	0.00531463	-0.0328199	-0.00520306
0.1604	0.00537251	-0.0325903	-0.00014381
0.1606	0.0054338	-0.0340335	-0.00561436
0.1608	0.00531123	-0.0325794	-0.00288196
0.161	0.00539067	-0.0326341	-5.4648e-05
0.1612	0.00529534	-0.0354875	-0.00454441
0.1614	0.00557225	-0.0324701	-0.00072193
0.1616	0.00530669	-0.034274	-0.00325587
0.1618	0.00537251	-0.032809	-0.00502186
0.162	0.00540656	-0.0332791	-1.7257e-05
0.1622	0.005486	-0.0341756	-0.00436321
0.1624	0.00525675	-0.0329511	-0.00343707
0.1626	0.00532258	-0.0347441	-0.00068166
0.1628	0.00541904	-0.0319781	-0.00370456
0.163	0.00530669	-0.0341865	-0.00333928
0.1632	0.00537138	-0.035411	-0.00181201
0.1634	0.00548146	-0.0317157	-0.00496146
0.1636	0.00529534	-0.0351814	-0.00398355
0.1638	0.00540996	-0.0321312	-0.00122814
0.164	0.00504453	-0.032481	-0.00610619
0.1642	0.00525449	-0.0326341	-0.00337379
0.1644	0.00582533	-0.0327762	-0.00490681
0.1646	0.00545649	-0.0329839	-0.00518868
0.1648	0.00552572	-0.033782	-0.00345433
0.165	0.0054826	-0.0327325	-0.00606592
0.1652	0.00546103	-0.0364387	-4.8896e-05
0.1654	0.00554728	-0.0330167	0.00090025
0.1656	0.00561765	-0.0336945	-0.00523182
0.1658	0.00544741	-0.0364824	-0.00302289
0.166	0.00546103	-0.0352142	-0.00013518
0.1662	0.0055348	-0.033137	-0.00588185
0.1664	0.00541223	-0.0375538	-0.00348596
0.1666	0.00562332	-0.0373351	-0.00055223
0.1668	0.00550416	-0.0358155	-0.0064312
0.167	0.00550075	-0.0326559	-0.00235274
0.1672	0.00557566	-0.0326231	-0.0022722
0.1674	0.00549621	-0.0333447	-0.00522607
0.1676	0.0054599	-0.035411	-0.00096353
0.1678	0.00583214	-0.0330823	-0.0050046
0.168	0.00549281	-0.0338367	-0.00517142
0.1682	0.00545195	-0.033782	-0.00111022
0.1684	0.00573794	-0.0336289	-0.00349172
0.1686	0.00545195	-0.0341865	-0.00523757
0.1688	0.00557679	-0.0345036	-0.00148125
0.169	0.00569255	-0.0326669	-0.00290497
0.1692	0.00564034	-0.0343505	-0.0047141
0.1694	0.00558133	-0.0343068	0.0001093
0.1696	0.00573113	-0.032973	-0.0022003
0.1698	0.0055575	-0.0349737	-0.00520881
0.17	0.00559495	-0.0343396	-0.00094052
0.1702	0.00582419	-0.0337164	-0.00322423
0.1704	0.00569482	-0.036712	-0.00425391
0.1706	0.00562786	-0.0337492	0.00161643
0.1708	0.00586164	-0.0349299	-0.0019587
0.171	0.00569028	-0.035903	-0.00157616
0.1712	0.00584122	-0.0335743	0.00131155
0.1714	0.00560857	-0.0337274	-0.00139784
0.1716	0.00552459	-0.036384	-0.00206512
0.1718	0.0057822	-0.0329293	-0.00158191
0.172	0.00579923	-0.0328309	-0.00293948
0.1722	0.00578561	-0.0352033	-0.00019846
0.1724	0.00588434	-0.0340335	-0.00428555
0.1726	0.00578447	-0.032153	-0.00184365
0.1728	0.00598194	-0.0348316	0.00159917
0.173	0.00584349	-0.0328309	-0.00345433
0.1732	0.00572659	-0.0326778	-0.00239013
0.1734	0.00601826	-0.0356952	0.00025311
0.1736	0.00577199	-0.0316283	-0.00190693
0.1738	0.00602507	-0.0330167	-0.00064139
0.174	0.00606819	-0.034755	-0.00222043
0.1742	0.00582192	-0.0332572	-0.00121664
0.1744	0.00541677	-0.0348425	-0.00050046
0.1746	0.00581398	-0.0322733	0.0010642
0.1748	0.00591385	-0.0338585	-0.00202197
0.175	0.00577085	-0.0321858	0.00192994
0.1752	0.00594336	-0.0313768	-0.00379947
0.1754	0.0057334	-0.0327981	-0.0031063
0.1756	0.00598194	-0.0327653	0.00155603
0.1758	0.00579469	-0.0312894	-0.00376208
0.176	0.0058503	-0.0322952	-0.00283306
0.1762	0.00587753	-0.031672	0.00097791
0.1764	0.00578447	-0.0312675	-0.0038081
0.1766	0.00596265	-0.0305241	-0.00057237
0.1768	0.00585484	-0.0324482	-0.00274103
0.177	0.00596946	-0.035564	-0.00237575
0.1772	0.00596832	-0.0353345	0.00196157
0.1774	0.0057334	-0.0318469	-0.00420214
0.1776	0.00590477	-0.0321202	-0.00071905
0.1778	0.00586959	-0.0325685	0.00060688
0.178	0.00600804	-0.0320328	-0.00490681
0.1782	0.00601258	-0.0330167	-0.00178613
0.1784	0.00576518	-0.0345801	-0.00042855
0.1786	0.00585597	-0.0305897	-0.00260872
0.1788	0.00610451	-0.0322952	0.00299701
0.179	0.00579923	-0.0325903	-0.00147837
0.1792	0.00598194	-0.0318032	-0.00474862
0.1794	0.00583895	-0.0312675	-0.00287908
0.1796	0.00597513	-0.0297916	0.000302
0.1798	0.00584916	-0.0329511	-0.00140071
0.18	0.0059252	-0.0315299	-0.00230672
0.1802	0.00582419	-0.0295511	0.00171997
0.1804	0.00586845	-0.0346457	-0.00414749
0.1806	0.00599216	-0.0308848	-0.00133168
0.1808	0.00578447	-0.030218	0.00035665
0.181	0.00599443	-0.0331698	-0.00299413
0.1812	0.00581171	-0.0350939	0.00116199
0.1814	0.00614196	-0.0296932	-0.00403244
0.1816	0.00589683	-0.0322405	-0.00226358
0.1818	0.00599102	-0.0332135	-0.00059538
0.182	0.00584803	-0.0326013	-0.00437471
0.1822	0.00573227	-0.032645	-0.00025023
0.1824	0.00589456	-0.0340335	0.00040555
0.1826	0.00564488	-0.0320328	-0.00392315
0.1828	0.00575951	-0.0317157	-0.00278992
0.183	0.00593201	-0.0337164	-0.00107283
0.1832	0.00597059	-0.0314096	-0.00465083
0.1834	0.00589683	-0.0318469	-0.00449264
0.1836	0.00591612	-0.0336617	-0.00021859
0.1838	0.00570957	-0.0343614	-0.00442936
0.184	0.00575497	-0.0293871	-0.00324149
0.1842	0.00592066	-0.03118	0.00099229
0.1844	0.00626793	-0.032	-0.00450414
0.1846	0.00602961	-0.0330386	-0.00299988
0.1848	0.00609316	-0.033465	-0.00300851
0.185	0.00590477	-0.0323936	-0.00348596
0.1852	0.0059059	-0.0335196	-4.8896e-05
0.1854	0.00612494	-0.0348316	-0.00072193
0.1856	0.00587867	-0.0334103	-0.00374482
0.1858	0.00608749	-0.0316829	-0.00348884
0.186	0.00601712	-0.0347878	-0.00237287
0.1862	0.00579582	-0.0337383	-0.00459906
0.1864	0.00607841	-0.0332026	-0.00014093
0.1866	0.00599443	-0.0362965	-0.00343419
0.1868	0.00572773	-0.0329293	-0.00251956
0.187	0.00618622	-0.0320546	0.00077658
0.1872	0.0060228	-0.0325357	-0.00539577
0.1874	0.00584122	-0.0330167	-0.0031552
0.1876	0.00611813	-0.0315189	0.00096641
0.1878	0.00616125	-0.0335306	-0.00563737
0.188	0.00584689	-0.0306334	-0.00130005
0.1882	0.00613742	-0.0348425	-0.00125978
0.1884	0.00615444	-0.0320109	-0.00476875
0.1886	0.00591612	-0.0315189	-0.00250805
0.1888	0.006218	-0.0341209	-3.1638e-05
0.189	0.00605798	-0.0335306	-0.00522895
0.1892	0.00597059	-0.0325466	-0.00070755
0.1894	0.00621573	-0.0350721	-5.7524e-06
0.1896	0.00606933	-0.033946	-0.00363553
0.1898	0.00614763	-0.0312456	-0.00118212
0.19	0.00616125	-0.0345254	-0.00022722
0.1902	0.00609202	-0.0320765	-0.00462494
0.1904	0.00605911	-0.0338367	-0.00028187
0.1906	0.00631106	-0.0341537	-0.00014669
0.1908	0.00609429	-0.031989	-0.00553958
0.191	0.00624637	-0.0349409	0.00085423
0.1912	0.0062214	-0.0341647	1.1505e-05
0.1914	0.00600464	-0.0327215	-0.00334503
0.1916	0.00614423	-0.0322733	0.00164231
0.1918	0.00618508	-0.0348753	-0.00387138
0.192	0.00620665	-0.0306662	-0.00082835
0.1922	0.00646086	-0.0331479	-0.00167971
0.1924	0.00613515	-0.033301	-0.0051254
0.1926	0.00623388	-0.031989	0.0010757
0.1928	0.00643362	-0.0330932	0.00027899
0.193	0.00633035	-0.0342521	-0.00167395
0.1932	0.0062668	-0.0302835	0.00028187
0.1934	0.00628949	-0.031191	0.00102681
0.1936	0.00623956	-0.0336508	-0.00250805
0.1938	0.0064688	-0.0309614	0.00354636
0.194	0.00637347	-0.0344052	-0.00440347
0.1942	0.00630198	-0.0339241	-0.00157904
0.1944	0.00596038	-0.0320984	0.00089738
0.1946	0.0061204	-0.0327325	-0.00092039
0.1948	0.00614763	-0.0326669	0.00164519
0.195	0.00627474	-0.0318797	0.0013662
0.1952	0.0062929	-0.0305787	-0.00641107
0.1954	0.00618508	-0.0317048	0.0002905
0.1956	0.00637007	-0.0301742	-0.00065002
0.1958	0.00617941	-0.0315845	-0.00022434
0.196	0.00631673	-0.030218	0.00181776
0.1962	0.00620778	-0.0306334	-0.00132593
0.1964	0.00630198	-0.0287639	-0.00138346
0.1966	0.00634964	-0.0296276	0.00336229
0.1968	0.00615785	-0.0287967	-0.00348309
0.197	0.00629176	-0.0367557	-0.00072768
0.1972	0.00640525	-0.0313877	0.00136332
0.1974	0.00616012	-0.0319672	-0.00396054
0.1976	0.00630879	-0.0310707	-0.00070467
0.1978	0.00626907	-0.0309286	0.00075932
0.198	0.00630311	-0.0342959	-0.0023326
0.1982	0.00633716	-0.0296276	0.00120801
0.1984	0.00617941	-0.0301742	-0.00356362
0.1986	0.00627588	-0.0331042	0.00164231
0.1988	0.00638028	-0.0296057	5.4648e-05
0.199	0.00620551	-0.0328527	-0.0015474
0.1992	0.00635305	-0.0319234	-0.00255695
0.1994	0.0062214	-0.0301742	-4.3143e-05
0.1996	0.00634964	-0.0315299	0.00159917
0.1998	0.0061499	-0.0328309	-0.00281293
0.2	0.00640071	-0.0304694	-0.00031926
0.2002	0.00615558	-0.0320328	-0.00167395
0.2004	0.00618282	-0.0332354	-0.00062414
0.2006	0.00635418	-0.0289716	-0.0012569
0.2008	0.00620778	-0.0312347	-0.00255695
0.201	0.00628495	-0.0316939	0.00243902
0.2012	0.00647448	-0.0333994	-0.00258571
0.2014	0.00633148	-0.0302835	-0.00034514
0.2016	0.0063451	-0.0323061	-0.00105269
0.2018	0.00643589	-0.0309614	-0.00328751
0.202	0.00621459	-0.0301086	-0.00199896
0.2022	0.00618055	-0.0307099	0.00218304
0.2024	0.00638936	-0.029879	-0.00302002
0.2026	0.0061953	-0.0317704	-0.00157041
0.2028	0.0063678	-0.0290263	0.00012655
0.203	0.00609543	-0.0317267	-0.00293373
0.2032	0.00618735	-0.0296823	0.00020133
0.2034	0.00630311	-0.0298572	-0.00380235
0.2036	0.00621232	-0.0335743	-0.00199034
0.2038	0.00609656	-0.0322733	-0.00092902
0.204	0.00601599	-0.0303491	-0.00282444
0.2042	0.00608862	-0.0270693	-0.00280143
0.2044	0.00674571	-0.0308083	0.00178613
0.2046	0.0062963	-0.0310816	-0.00490393
0.2048	0.00623275	-0.030863	-0.00398642
0.205	0.00621913	-0.0334868	-8.6286e-05
0.2052	0.00635305	-0.0324373	-0.00090888
0.2054	0.00626112	-0.0334759	-0.00186091
0.2056	0.00645405	-0.0330277	-0.00211977
0.2058	0.00626339	-0.0316064	-0.00229809
0.206	0.00634851	-0.0334431	-0.00168833
0.2062	0.00641433	-0.0329293	0.00097503
0.2064	0.00600691	-0.0322624	-0.00451565
0.2066	0.00625658	-0.0377178	-0.00071618
0.2068	0.00631787	-0.0332354	0.00093477
0.207	0.0062929	-0.0285781	-0.00547918
0.2072	0.00625091	-0.0312675	0.00017545
0.2074	0.00638255	-0.0328637	-0.00144386
0.2076	0.00620324	-0.0327325	-0.00522607
0.2078	0.00645178	-0.032973	1.1505e-05
0.208	0.00630425	-0.0313222	-0.00212264
0.2082	0.00628382	-0.0304366	-0.00379659
0.2084	0.00644611	-0.0330386	0.00216578
0.2086	0.00641887	-0.0320984	-0.00168546
0.2088	0.00617601	-0.0318797	-0.00406121
0.209	0.00631446	-0.0341974	0.00026461
0.2092	0.00646086	-0.0313768	-0.00123677
0.2094	0.00627361	-0.0362309	-0.00260297
0.2096	0.00642	-0.033946	0.00223769
0.2098	0.00659591	-0.0310816	-0.00163944
0.21	0.00623615	-0.0335743	-0.00325299
0.2102	0.00647788	-0.0334103	-9.2039e-05
0.2104	0.00649604	-0.0323608	0.00185515
0.2106	0.00642795	-0.0335634	-0.00348884
0.2108	0.00639617	-0.0327871	0.00180051
0.211	0.00640979	-0.0300321	-0.00023873
0.2112	0.00656413	-0.0331151	-0.00397492
0.2114	0.00630425	-0.0332135	0.00309192
0.2116	0.00637574	-0.0306553	0.00015819
0.2118	0.00657435	-0.034755	-0.00289059
0.212	0.00652895	-0.0323389	0.00254257
0.2122	0.00647448	-0.029562	-0.0053555
0.2124	0.00659591	-0.0321421	0.00095778
0.2126	0.00656413	-0.0321749	-0.000604
0.2128	0.00642227	-0.030535	-0.00229809
0.213	0.00661974	-0.0334978	0.00337667
0.2132	0.0065142	-0.0292231	-0.00118787
0.2134	0.00646313	-0.0318579	0.00017257
0.2136	0.0067128	-0.0310598	0.00226358
0.2138	0.00657548	-0.0280752	0.00026749
0.214	0.00674571	-0.0324701	-0.00184077
0.2142	0.00667989	-0.035739	0.00302577
0.2144	0.0060716	-0.0310488	0.00042855
0.2146	0.00645178	-0.0328746	0.00348309
0.2148	0.00646426	-0.0326559	0.00277842
0.215	0.00650285	-0.0291575	-0.00135469
0.2152	0.00652555	-0.0308411	-0.00012655
0.2154	0.00643022	-0.0308958	-0.0016682
0.2156	0.0064166	-0.0293105	-0.00105269
0.2158	0.0066379	-0.0316501	0.00330764
0.216	0.00637347	-0.0307974	-0.00198746
0.2162	0.00664925	-0.0310488	-0.00107858
0.2164	0.00637574	-0.0301742	0.00266337
0.2166	0.00649945	-0.0267523	-0.00209676
0.2168	0.006664	-0.0292231	0.00032501
0.217	0.00650512	-0.0359904	0.00379084
0.2172	0.00662088	-0.0306006	-0.00220318
0.2174	0.00660045	-0.0333775	1.1505e-05
0.2176	0.0063644	-0.0316064	0.00228083
0.2178	0.00666287	-0.0311144	-0.00198171
0.218	0.00663223	-0.0313331	0.00083122
0.2182	0.00659591	-0.0311363	-6.04e-05
0.2184	0.0064688	-0.0289279	-0.00182064
0.2186	0.00656413	-0.032164	0.00228371
0.2188	0.00660272	-0.0299337	0.00065865
0.219	0.00646426	-0.0301961	0.00174298
0.2192	0.00661066	-0.0314533	-0.00090025
0.2194	0.00658456	-0.0289498	-0.00097216
0.2196	0.00654371	-0.0323826	0.00309192
0.2198	0.00653917	-0.0320984	-0.00296537
0.22	0.00649604	-0.0296823	-0.00025886
0.2202	0.00655846	-0.0318579	-8.0534e-05
0.2204	0.00646994	-0.0292668	-0.00089738
0.2206	0.0066345	-0.0288295	-0.00082547
0.2208	0.00648923	-0.0310707	-4.3143e-05
0.221	0.00649718	-0.0307755	0.00192418
0.2212	0.006462	-0.0325794	-0.00323286
0.2214	0.00672188	-0.0283922	0.00105269
0.2216	0.00654144	-0.0315845	-0.00010067
0.2218	0.00647788	-0.0300977	-0.00281868
0.222	0.00664244	-0.0304366	0.0014985
0.2222	0.00641093	-0.0327434	-0.00064139
0.2224	0.00645065	-0.0300868	0.0008226
0.2226	0.00647902	-0.031836	0.00100667
0.2228	0.00642341	-0.0299665	-0.00373332
0.223	0.00650626	-0.0310926	-0.00033364
0.2232	0.00656867	-0.0322405	-0.00027036
0.2234	0.00634964	-0.0299228	-0.00362977
0.2236	0.006563	-0.0317048	-0.00136045
0.2238	0.00639958	-0.0313331	-0.00104119
0.224	0.00619189	-0.0298462	-0.00200472
0.2242	0.00637347	-0.0305787	0.0019702
0.2244	0.0068104	-0.0301196	-0.00382536
0.2246	0.00657094	-0.0313003	-0.00244478
0.2248	0.00649264	-0.0322733	-0.00132593
0.225	0.00662996	-0.0296057	-0.0036269
0.2252	0.00639504	-0.034274	-0.00030775
0.2254	0.00665379	-0.0338148	0.00086861
0.2256	0.00649718	-0.0317595	-0.00491832
0.2258	0.00652214	-0.0325247	0.00106132
0.226	0.00666854	-0.0323717	-0.00142085
0.2262	0.00640185	-0.0307755	-0.00496721
0.2264	0.00647334	-0.032153	-0.00071618
0.2266	0.00669465	-0.0372695	-0.00075932
0.2268	0.00638369	-0.0341756	-0.00083122
0.227	0.00650739	-0.0288623	0.00074781
0.2272	0.00669918	-0.0303273	-0.00408422
0.2274	0.00633943	-0.0297369	-0.00166532
0.2276	0.00659024	-0.0326341	0.00095778
0.2278	0.00649491	-0.0318579	-0.00430568
0.228	0.00640979	-0.0288186	-0.00057812
0.2282	0.0066606	-0.0317157	0.0022118
0.2284	0.00648356	-0.0323389	-0.00487517
0.2286	0.00659591	-0.0299993	-0.00126553
0.2288	0.00669691	-0.0329074	-0.00052635
0.229	0.00654825	-0.0316064	-0.00382536
0.2292	0.00656754	-0.0316939	0.00084848
0.2294	0.00666854	-0.0339897	0.00092326
0.2296	0.00673437	-0.031508	-0.00326162
0.2298	0.00654938	-0.0309614	0.00012943
0.23	0.00667762	-0.0347878	0.00339105
0.2302	0.00667876	-0.0310379	-0.00228659
0.2304	0.00655052	-0.0327543	-0.00062126
0.2306	0.0068104	-0.0331042	0.00445525
0.2308	0.00659024	-0.0313877	-0.00422227
0.231	0.00670826	-0.032481	0.00107858
0.2312	0.00667195	-0.0338257	0.0028043
0.2314	0.00655846	-0.0307864	-0.00302577
0.2316	0.0066867	-0.032317	0.00311493
0.2318	0.00654598	-0.0311363	-0.00064427
0.232	0.00669465	-0.0305569	-0.00239301
0.2322	0.00684558	-0.0328637	0.00236424
0.2324	0.00665038	-0.0322405	-0.00355212
0.2326	0.00672983	-0.029879	0.00072193
0.2328	0.0067616	-0.0336508	0.00071042
0.233	0.00669124	-0.0304694	0.00026461
0.2332	0.00679451	-0.0304366	-0.00163081
0.2334	0.00671848	-0.0333556	0.00371606
0.2336	0.00676274	-0.0316939	-0.00095202
0.2338	0.00685353	-0.0288951	0.00073343
0.234	0.00697269	-0.0342084	0.002672
0.2342	0.00689211	-0.032328	-0.00181489
0.2344	0.00626453	-0.0315627	0.00366141
0.2346	0.00667195	-0.0325138	-0.00034802
0.2348	0.0066833	-0.0287311	0.00561723
0.235	0.00681835	-0.0319125	-0.002091
0.2352	0.00655052	-0.0285125	0.00119938
0.2354	0.00688644	-0.0294417	-0.00314082
0.2356	0.00657889	-0.0302507	0.00258571
0.2358	0.00679451	-0.029715	-0.00038254
0.236	0.0068592	-0.030218	-0.0010642
0.2362	0.00667308	-0.0306881	0.00436896
0.2364	0.00672983	-0.0268725	-0.00251668
0.2366	0.00661407	-0.0280424	0.00375345
0.2368	0.00682402	-0.02989	-0.0002301
0.237	0.00677409	-0.0321858	0.00048896
0.2372	0.00668103	-0.0342084	0.00245628
0.2374	0.00685126	-0.0313222	-0.00251381
0.2376	0.00673323	-0.0277034	0.00144961
0.2378	0.00673437	-0.031836	0.00033939
0.238	0.00684218	-0.0307755	0.00360676
0.2382	0.00680473	-0.0299774	-0.00271802
0.2384	0.00682402	-0.031836	0.00410147
0.2386	0.00664131	-0.0298572	-0.0014266
0.2388	0.00693978	-0.0308302	0.00152439
0.239	0.00669011	-0.0323061	0.0018983
0.2392	0.00684445	-0.029398	-0.00091176
0.2394	0.0066345	-0.0289716	-0.00139208
0.2396	0.00666287	-0.0323389	0.00349747
0.2398	0.00671053	-0.028742	-0.0015589
0.24	0.00685126	-0.0301305	-0.00017545
0.2402	0.0065664	-0.0302289	0.001487
0.2404	0.00682856	-0.0285125	-0.00014093
0.2406	0.00660612	-0.0300758	0.00144673
0.2408	0.00674571	-0.0282829	-0.00182639
0.241	0.00665038	-0.0304257	0.00183502
0.2412	0.00674231	-0.0312456	-0.00190117
0.2414	0.00669238	-0.0279112	0.00264899
0.2416	0.00695794	-0.029879	-0.00252819
0.2418	0.00668443	-0.0308739	-0.00056661
0.242	0.00677749	-0.0278893	0.00094627
0.2422	0.00675593	-0.0306115	-0.00036815
0.2424	0.00655506	-0.0311691	0.00263461
0.2426	0.00671621	-0.0305241	-0.00322135
0.2428	0.00655392	-0.0286655	-0.00075069
0.243	0.00666968	-0.0311582	0.0008226
0.2432	0.00670599	-0.031344	-0.00192131
0.2434	0.00652441	-0.0289388	-0.00169984
0.2436	0.00670145	-0.0314861	9.2039e-05
0.2438	0.00665492	-0.0302617	-0.00167683
0.244	0.00638369	-0.0295948	-0.00073631
0.2442	0.00664244	-0.0297916	0.00329038
0.2444	0.0070317	-0.0290044	-0.0045214
0.2446	0.00676955	-0.0322733	-0.00288196
0.2448	0.00679224	-0.0310488	-0.00039404
0.245	0.00674344	-0.0306881	-0.00325587
0.2452	0.00668784	-0.0327762	0.00125978
0.2454	0.00677522	-0.0312347	-0.00062701
0.2456	0.00662655	-0.0313987	-0.00141222
0.2458	0.00662088	-0.0326559	-0.00186954
0.246	0.00688984	-0.0315299	0.00132593
0.2462	0.00660272	-0.0326778	-0.0024304
0.2464	0.00670259	-0.032645	-0.00151576
0.2466	0.00680359	-0.0330277	0.00107858
0.2468	0.00650853	-0.0344489	-0.00410147
0.247	0.00677182	-0.027605	-0.00167108
0.2472	0.00690006	-0.0299665	0.00061838
0.2474	0.00659591	-0.0319016	-0.00413311
0.2476	0.00668216	-0.0301305	-0.00173723
0.2478	0.0069534	-0.0287639	0.00111884
0.248	0.00656413	-0.0326669	-0.0044725
0.2482	0.00678203	-0.0325575	-0.00087724
0.2484	0.00684899	-0.0296823	0.00123965
0.2486	0.00663677	-0.0329074	-0.00293948
0.2488	0.00680473	-0.0305241	-0.00178613
0.249	0.00682516	-0.0288623	0.00322998
0.2492	0.00670599	-0.0325794	-0.00281293
0.2494	0.00692049	-0.032164	0.00138346
0.2496	0.00686374	-0.0316064	0.00264611
0.2498	0.0067582	-0.0325794	-0.0022003
0.25	0.00688417	-0.0317376	0.00068166
0.2502	0.00683991	-0.0324264	0.0024908
0.2504	0.00669011	-0.0344598	-0.00231247
0.2506	0.00695567	-0.0308083	-0.00072193
0.2508	0.00678771	-0.0315955	0.00477738
0.251	0.00678771	-0.0326669	-0.00167971
0.2512	0.00678997	-0.0302507	-0.00050909
0.2514	0.00679905	-0.0321968	0.00333353
0.2516	0.00664812	-0.0306771	0.00129717
0.2518	0.00693751	-0.0291684	-0.00119363
0.252	0.00687963	-0.0300321	0.00191843
0.2522	0.00694318	-0.0326669	-0.00145249
0.2524	0.00704305	-0.0286109	-0.00129142
0.2526	0.00684331	-0.0322842	0.00130005
0.2528	0.00709072	-0.0292668	-0.00172572
0.253	0.00694886	-0.0294527	0.00508226
0.2532	0.00690914	-0.0311691	-2.301e-05
0.2534	0.00693751	-0.0306881	-0.00055223
0.2536	0.00707823	-0.0300649	0.00442648
0.2538	0.00680359	-0.0323061	0.00017257
0.254	0.00742891	-0.0310379	-0.00097503
0.2542	0.00698631	-0.0331588	0.00459618
0.2544	0.00666287	-0.0313877	-0.00074494
0.2546	0.00698063	-0.0305241	0.00383686
0.2548	0.00677068	-0.0298353	0.00328463
0.255	0.00705894	-0.0309177	0.00138921
0.2552	0.00686147	-0.026796	0.00299413
0.2554	0.0066867	-0.0306334	-0.00215716
0.2556	0.00707823	-0.0293324	-0.00023873
0.2558	0.00678657	-0.0282501	0.00401519
0.256	0.00689665	-0.0321749	-0.00091463
0.2562	0.00691141	-0.0273427	0.00294236
0.2564	0.00678544	-0.0283266	-0.00075932
0.2566	0.00707823	-0.0275941	0.00012655
0.2568	0.00686828	-0.0271021	-0.0008945
0.257	0.00693524	-0.0334978	0.00524908
0.2572	0.00715087	-0.030852	8.6286e-06
0.2574	0.0068365	-0.0297806	0.0007737
0.2576	0.00692503	-0.0309067	0.00123102
0.2578	0.00692389	-0.0283485	0.00013806
0.258	0.00686034	-0.0311144	0.00239013
0.2582	0.00708958	-0.0294745	-0.00260872
0.2584	0.00682743	-0.0283485	0.00232973
0.2586	0.00678317	-0.0316501	-0.0010038
0.2588	0.00711795	-0.0303819	0.0013777
0.259	0.00677976	-0.0293215	0.00305453
0.2592	0.00694886	-0.0309177	8.6286e-05
0.2594	0.00706348	-0.0268835	-0.00088587
0.2596	0.00683764	-0.0309942	0.00276979
0.2598	0.00699312	-0.0294636	0.0001812
0.26	0.00701128	-0.0284687	-0.00174011
0.2602	0.00678317	-0.0305022	0.00429993
0.2604	0.00702489	-0.0277362	-0.00111884
0.2606	0.00680359	-0.0294199	-0.00096353
0.2608	0.00692049	-0.0297806	0.0035176
0.261	0.00692956	-0.0304475	-0.00119938
0.2612	0.00696588	-0.030218	-0.00068741
0.2614	0.00700787	-0.0284578	0.00325299
0.2616	0.00694545	-0.0310379	-0.00306029
0.2618	0.00697836	-0.0284031	0.00159054
0.262	0.00675593	-0.0295183	-0.00262023
0.2622	0.00685466	-0.0304147	0.00295962
0.2624	0.00684558	-0.0280205	-0.00089738
0.2626	0.00675366	-0.0304475	-0.00043718
0.2628	0.00690914	-0.0290919	-0.00054648
0.263	0.00682402	-0.0304913	-0.00232398
0.2632	0.00687963	-0.0329293	0.00251093
0.2634	0.00711001	-0.0283703	-0.00234699
0.2636	0.00676955	-0.0308739	-0.00131443
0.2638	0.00684899	-0.0292996	0.00184365
0.264	0.00672188	-0.0296276	-0.00260872
0.2642	0.00677976	-0.0313877	2.301e-05
0.2644	0.00719286	-0.0304694	0.0017171
0.2646	0.0070805	-0.0301742	-0.00567188
0.2648	0.0068785	-0.0317376	-0.00382248
0.265	0.00687736	-0.0308958	0.00108145
0.2652	0.0070056	-0.0322842	0.00011792
0.2654	0.006807	-0.0310926	-0.00115336
0.2656	0.00695453	-0.0316064	0.00069604
0.2658	0.00696475	-0.0306553	-0.00200184
0.266	0.00690687	-0.0320437	-0.00210538
0.2662	0.00704078	-0.0304694	0.00254257
0.2664	0.00690687	-0.0330604	-0.00181776
0.2666	0.00672075	-0.0337164	-0.00069604
0.2668	0.00699766	-0.0323608	0.00360389
0.267	0.00685353	-0.028261	-0.00444662
0.2672	0.00687396	-0.0300758	-0.00084848
0.2674	0.00703397	-0.0287639	-0.00031638
0.2676	0.00675139	-0.0312347	-0.00398642
0.2678	0.00693637	-0.0307864	0.00186091
0.268	0.00703511	-0.0293761	0.00061551
0.2682	0.00677409	-0.0325247	-0.00364128
0.2684	0.00690233	-0.0319672	0.00189542
0.2686	0.00706802	-0.0300321	-0.00085423
0.2688	0.00691708	-0.0317267	-0.00374195
0.269	0.00698177	-0.031191	0.00164231
0.2692	0.00703851	-0.029726	0.00199896
0.2694	0.0068592	-0.0328309	-0.00144673
0.2696	0.00697269	-0.0296167	0.00192706
0.2698	0.00711682	-0.0313877	0.00092326
0.27	0.00692956	-0.0335743	-0.00100667
0.2702	0.0070022	-0.0305131	-2.0133e-05
0.2704	0.00711115	-0.0321421	0.00271514
0.2706	0.00698063	-0.0319781	-0.00113898
0.2708	0.00705667	-0.0291028	0.00283594
0.271	0.00690687	-0.032164	0.00218017
0.2712	0.0069307	-0.0306771	-0.00259434
0.2714	0.00698177	-0.0306881	0.00421077
0.2716	0.00684445	-0.0317267	-0.0004832
0.2718	0.00698177	-0.0318141	-0.00142948
0.272	0.0072462	-0.030371	0.00428555
0.2722	0.00694205	-0.0323389	-0.00109296
0.2724	0.00711115	-0.0317595	5.7524e-05
0.2726	0.00717924	-0.029715	0.00140934
0.2728	0.00704192	-0.0319562	-0.00121951
0.273	0.00727457	-0.0316283	0.00488092
0.2732	0.00718718	-0.0290044	0.00060688
0.2734	0.00719513	-0.0305131	0.0011361
0.2736	0.00718491	-0.0300977	0.00439772
0.2738	0.00710093	-0.0288732	0.00053497
0.274	0.00742664	-0.0322842	0.00185515
0.2742	0.00709753	-0.0305897	0.00168258
0.2744	0.00666287	-0.0311254	-0.00121664
0.2746	0.00703511	-0.0324373	0.00623274
0.2748	0.00698631	-0.0284797	0.00216578
0.275	0.00703851	-0.0314205	0.00056086
0.2752	0.00714065	-0.0296932	0.00143235
0.2754	0.00713952	-0.0289607	0.00019846
0.2756	0.00702262	-0.0292668	-0.00161355
0.2758	0.00722236	-0.0295729	0.00405833
0.276	0.00696361	-0.0279439	-0.00054073
0.2762	0.00726208	-0.0299884	-7.1905e-05
0.2764	0.00701695	-0.0288842	0.00407559
0.2766	0.00691141	-0.0240847	-0.00274678
0.2768	0.00725981	-0.0292449	0.00186378
0.277	0.00698971	-0.0307755	0.00304303
0.2772	0.00705894	-0.0314424	-0.00157041
0.2774	0.00725641	-0.0313659	0.00386275
0.2776	0.00689665	-0.0274192	-0.00014093
0.2778	0.00717129	-0.0314096	-0.000604
0.278	0.00708277	-0.0301852	0.0033968
0.2782	0.00707596	-0.0294855	-0.00141797
0.2784	0.00711115	-0.0325466	0.00104119
0.2786	0.00696021	-0.0300977	0.00406696
0.2788	0.00715087	-0.0289607	-8.6286e-05
0.279	0.00698177	-0.030218	0.0042913
0.2792	0.007152	-0.0281079	-0.00062989
0.2794	0.00714519	-0.0292777	-0.00219455
0.2796	0.00713044	-0.0301086	0.00340831
0.2798	0.00697723	-0.0270365	0.00032214
0.28	0.00714746	-0.0308192	-0.00170559
0.2802	0.0073472	-0.0279986	0.00275253
0.2804	0.00697836	-0.0304257	-0.00098942
0.2806	0.00715995	-0.0284031	-9.7791e-05
0.2808	0.00706915	-0.029234	0.00229234
0.281	0.00701922	-0.0296057	-0.00148125
0.2812	0.00703397	-0.030863	0.00065865
0.2814	0.00714746	-0.0271896	0.00276979
0.2816	0.00719059	-0.0303929	0.00083698
0.2818	0.0069341	-0.0296276	-0.00069029
0.282	0.00716335	-0.0282391	-1.7257e-05
0.2822	0.00691368	-0.0306553	0.00425966
0.2824	0.00702036	-0.0282282	-0.00183502
0.2826	0.00697836	-0.0319672	0.0007248
0.2828	0.006908	-0.0273864	0.00157616
0.283	0.00697836	-0.0290372	-0.00127416
0.2832	0.00707369	-0.029879	0.00191268
0.2834	0.00679451	-0.029398	-0.00363553
0.2836	0.00696248	-0.0303491	3.4514e-05
0.2838	0.00709639	-0.0297806	0.00088875
0.284	0.0067128	-0.0292887	-0.0018983
0.2842	0.00689892	-0.0285343	0.00203923
0.2844	0.00731429	-0.0283266	-0.00230384
0.2846	0.00704759	-0.0317267	-0.00064139
0.2848	0.00706462	-0.028753	-0.00060688
0.285	0.00713498	-0.0305678	-0.00374482
0.2852	0.00705894	-0.0318251	0.00221756
0.2854	0.00724279	-0.029081	0.00472849
0.2856	0.00706008	-0.0320984	-0.00195295
0.2858	0.00706008	-0.0306443	-0.00044869
0.286	0.00716562	-0.0284031	0.00270076
0.2862	0.00703057	-0.0329074	-0.00299413
0.2864	0.00698063	-0.0317376	-0.00065865
0.2866	0.00715768	-0.0334212	0.00341118
0.2868	0.00686488	-0.033618	-0.00396917
0.287	0.00693524	-0.0282829	-0.0001812
0.2872	0.00721215	-0.0274301	0.00249367
0.2874	0.00693524	-0.0320328	-0.00367579
0.2876	0.00702149	-0.0298353	-0.00034802
0.2878	0.00718832	-0.0299337	0.00247354
0.288	0.00697723	-0.0315627	-0.00261447
0.2882	0.00713271	-0.0316173	0.0023326
0.2884	0.00725301	-0.0290372	0.00217154
0.2886	0.00698631	-0.0306334	-0.00277842
0.2888	0.00709639	-0.0306662	0.00025598
0.289	0.00719059	-0.0298025	0.00156178
0.2892	0.00703624	-0.0324373	-0.00192994
0.2894	0.00715768	-0.029562	0.00216003
0.2896	0.00720534	-0.0306006	0.00255695
0.2898	0.00689325	-0.0312238	-0.00249942
0.29	0.0071486	-0.0309832	0.00177462
0.2902	0.00721782	-0.0318469	0.00250805
0.2904	0.0071259	-0.0313331	-0.00193281
0.2906	0.00729046	-0.0285343	0.0018379
0.2908	0.0070998	-0.0322514	0.00307467
0.291	0.00703738	-0.0325138	-0.00192131
0.2912	0.00729159	-0.02989	0.001185
0.2914	0.00713952	-0.0320765	0.00299413
0.2916	0.00693524	-0.0318141	-0.00083985
0.2918	0.00733472	-0.0295183	0.00157904
0.292	0.00715881	-0.0320874	0.00274678
0.2922	0.00714973	-0.0322514	-0.00211689
0.2924	0.00728024	-0.0288951	0.00162506
0.2926	0.00719059	-0.0304366	8.6286e-06
0.2928	0.0073211	-0.0316501	-0.00011505
0.293	0.00730748	-0.030054	0.00313507
0.2932	0.00721782	-0.0301852	-0.0013662
0.2934	0.0073926	-0.0313768	0.00281293
0.2936	0.00722463	-0.030207	0.00375058
0.2938	0.00738465	-0.0316829	-0.00050334
0.294	0.00776484	-0.0291247	0.00332202
0.2942	0.00724506	-0.0328855	0.00421364
0.2944	0.00692503	-0.0307318	0.00038254
0.2946	0.00704646	-0.0302617	0.00363553
0.2948	0.00697609	-0.0293215	0.00236712
0.295	0.00728932	-0.0296823	0.0038081
0.2952	0.0071747	-0.0301852	-0.0019098
0.2954	0.00687169	-0.0269163	0.00463069
0.2956	0.00719513	-0.0291903	0.00011217
0.2958	0.00720761	-0.0288951	0.00402094
0.296	0.00712476	-0.0301742	0.00044006
0.2962	0.00729273	-0.0283047	-0.000302
0.2964	0.00711342	-0.02696	0.00464795
0.2966	0.00727343	-0.0268288	-0.00054648
0.2968	0.00735174	-0.0267086	0.00307179
0.297	0.00709753	-0.0315955	0.00093764
0.2972	0.00724847	-0.030699	0.00186091
0.2974	0.00720648	-0.0310926	0.00373907
0.2976	0.00718945	-0.0300758	-0.00051197
0.2978	0.0072757	-0.0304803	0.00322135
0.298	0.00730407	-0.0294089	0.00175161
0.2982	0.00718832	-0.0285781	-0.00150713
0.2984	0.00729954	-0.0297369	0.00434883
0.2986	0.00721782	-0.0268835	-0.00050046
0.2988	0.0072269	-0.0295401	0.00234986
0.299	0.00714746	-0.0301196	0.00435458
0.2992	0.00738125	-0.0285015	-0.00127128
0.2994	0.00713725	-0.029715	-0.00098942
0.2996	0.0071747	-0.030207	0.00468534
0.2998	0.00726549	-0.0277909	0.00084561
0.3	0.00705667	-0.0299884	0.00046019
0.3002	0.00725301	-0.0287311	0.00334503
0.3004	0.00708391	-0.0281626	-0.00171997
0.3006	0.00724052	-0.0293215	0.00130867
0.3008	0.00737784	-0.0273645	-0.0019587
0.301	0.00711568	-0.030043	0.00428267
0.3012	0.00718605	-0.0297478	-0.00018695
0.3014	0.00742437	-0.0285562	0.00187816
0.3016	0.00713725	-0.0295073	0.00105844
0.3018	0.00725868	-0.0293433	-0.00068741
0.302	0.00730634	-0.0282938	0.00379372
0.3022	0.0070317	-0.0313549	-0.0009434
0.3024	0.00706121	-0.0271896	0.00275828
0.3026	0.00723144	-0.0307755	-0.00090888
0.3028	0.00697156	-0.0294745	0.00023585
0.303	0.00709639	-0.0284797	0.00193856
0.3032	0.00718945	-0.0298353	-0.00125115
0.3034	0.00707142	-0.0282501	-5.7524e-06
0.3036	0.00713384	-0.0309067	0.00306604
0.3038	0.00723371	-0.0310488	-0.00151001
0.304	0.00683424	-0.02696	-0.00175736
0.3042	0.00701922	-0.0276816	0.00264324
0.3044	0.00744707	-0.0282829	-0.00306316
0.3046	0.00727797	-0.0309286	-0.00105844
0.3048	0.00715654	-0.0320109	0.00099229
0.305	0.00726095	-0.0302398	-0.00357225
0.3052	0.00720874	-0.0311691	0.00361827
0.3054	0.00721669	-0.0298681	0.00404682
0.3056	0.00731429	-0.0297806	-0.00155315
0.3058	0.00701809	-0.0327325	-0.00059825
0.306	0.00724847	-0.0298025	0.0024304
0.3062	0.00720988	-0.0296823	-0.00139208
0.3064	0.00715995	-0.0325247	0.00012943
0.3066	0.00740054	-0.0334759	0.00230384
0.3068	0.00717016	-0.0322186	-0.00261447
0.307	0.00707256	-0.028753	0.00228659
0.3072	0.00724279	-0.0270365	0.0004113
0.3074	0.00718037	-0.030535	-0.0010153
0.3076	0.00714406	-0.0309614	0.0030459
0.3078	0.00732337	-0.0291356	-0.00115911
0.308	0.00711795	-0.0309286	-0.00022434
0.3082	0.00719172	-0.0309504	0.00326737
0.3084	0.00730861	-0.0291138	-0.00311206
0.3086	0.00708164	-0.0336289	0.0008226
0.3088	0.00701468	-0.0290919	0.00146111
0.309	0.00735741	-0.0307537	-0.00266624
0.3092	0.00716335	-0.0312675	-0.0014985
0.3094	0.00716789	-0.0290044	0.00406408
0.3096	0.00728024	-0.0307099	-0.00080821
0.3098	0.00720421	-0.0321421	0.00046307
0.31	0.00721328	-0.030054	0.00315232
0.3102	0.00737671	-0.0322842	-0.00188967
0.3104	0.00717924	-0.0331698	0.00067303
0.3106	0.0073018	-0.029398	0.00326737
0.3108	0.00735174	-0.0327215	-0.00166532
0.311	0.00716335	-0.0320874	0.00049471
0.3112	0.00736195	-0.0300868	0.00398067
0.3114	0.00731088	-0.0316283	-0.00146974
0.3116	0.00720421	-0.030852	0.0035061
0.3118	0.00707937	-0.0267304	0.00243615
0.312	0.00748566	-0.0311472	-0.00120513
0.3122	0.0072723	-0.0306553	0.00299413
0.3124	0.00758779	-0.0286655	-0.00097216
0.3126	0.00729727	-0.0292449	-0.00053497
0.3128	0.00748112	-0.0306115	0.00527784
0.313	0.0073994	-0.028917	0.00115624
0.3132	0.00720307	-0.0313331	0.00306891
0.3134	0.00745615	-0.0288404	0.00468534
0.3136	0.00731769	-0.0313659	3.4514e-05
0.3138	0.00742324	-0.0291247	0.00518005
0.314	0.00759914	-0.0284031	0.00093189
0.3142	0.00751743	-0.0332463	0.00176024
0.3144	0.00705327	-0.0296604	0.00140647
0.3146	0.00709639	-0.0302507	0.00550794
0.3148	0.00719286	-0.0295073	0.00206512
0.315	0.00731883	-0.0281845	0.00466809
0.3152	0.00730067	-0.0260963	-0.00363265
0.3154	0.00725868	-0.029234	0.00484929
0.3156	0.00739713	-0.0273427	0.00018695
0.3158	0.00722804	-0.0287967	0.0024419
0.316	0.00737784	-0.0284031	-8.6286e-06
0.3162	0.0073733	-0.0271349	0.00506213
0.3164	0.00725868	-0.0295511	-0.00076507
0.3166	0.00734153	-0.0253201	0.00280718
0.3168	0.00748792	-0.0276925	0.00088875
0.317	0.00720421	-0.0313112	-0.00122239
0.3172	0.00743913	-0.0312784	0.00463932
0.3174	0.00733926	-0.0283485	0.00027612
0.3176	0.00721669	-0.0309723	0.00442361
0.3178	0.00745728	-0.0297916	0.00049183
0.318	0.00727684	-0.0294745	0.00215428
0.3182	0.00733245	-0.0301961	0.00579556
0.3184	0.00727003	-0.0275395	-0.00065865
0.3186	0.00724847	-0.0304147	0.00275253
0.3188	0.00742437	-0.0308083	0.00534399
0.319	0.00728932	-0.0280314	0.00103543
0.3192	0.00736422	-0.0293543	0.00153877
0.3194	0.00727797	-0.0286436	-0.00081109
0.3196	0.00741416	-0.0262385	0.00612057
0.3198	0.00713952	-0.0312566	3.7391e-05
0.32	0.00726208	-0.0278784	0.0023326
0.3202	0.00727116	-0.0286983	0.00192994
0.3204	0.00717583	-0.0306881	0.00031063
0.3206	0.00735401	-0.0283485	0.00392027
0.3208	0.00714633	-0.0289279	-0.00223481
0.321	0.00719513	-0.0285671	0.00401231
0.3212	0.00728365	-0.0313112	0.00055798
0.3214	0.00731429	-0.0280533	0.00041417
0.3216	0.00725074	-0.0291247	0.00320122
0.3218	0.00730861	-0.0301961	-0.00048033
0.322	0.00718264	-0.027605	-0.00068454
0.3222	0.00715541	-0.0317267	0.002091
0.3224	0.00733472	-0.0276816	0.00301714
0.3226	0.0070805	-0.0310816	-0.00331052
0.3228	0.00715541	-0.0280861	0.0012569
0.323	0.00729386	-0.0311254	0.00033076
0.3232	0.00705781	-0.0286546	-0.00015819
0.3234	0.00716562	-0.0313768	0.00279855
0.3236	0.00731088	-0.0271459	-0.00158191
0.3238	0.00700447	-0.0286218	-7.7658e-05
0.324	0.00699312	-0.0276597	0.0028532
0.3242	0.00710774	-0.0265336	-0.00250805
0.3244	0.00737671	-0.028589	0.00121088
0.3246	0.0074187	-0.0287858	3.7391e-05
0.3248	0.00739486	-0.0296604	-0.00348884
0.325	0.00708277	-0.0303054	0.0021514
0.3252	0.0073245	-0.0307427	0.00086861
0.3254	0.00733018	-0.0291793	-8.6286e-06
0.3256	0.00727797	-0.0315955	0.00025311
0.3258	0.00735628	-0.0301961	0.00084273
0.326	0.00725868	-0.0293105	-0.0010642
0.3262	0.00708391	-0.0318251	0.0018379
0.3264	0.00731429	-0.0300868	0.00013231
0.3266	0.00728819	-0.033618	-0.00232685
0.3268	0.00712817	-0.0341865	0.00195007
0.327	0.00738692	-0.0277144	-0.00159054
0.3272	0.00717924	-0.0265446	-0.00161068
0.3274	0.00717697	-0.0310051	0.002672
0.3276	0.00749019	-0.0294636	-0.00309768
0.3278	0.00710661	-0.0279002	0.00049471
0.328	0.00721896	-0.0310598	0.00289059
0.3282	0.00735968	-0.0307099	-0.00219455
0.3284	0.00718605	-0.0294199	-0.0002416
0.3286	0.00747658	-0.032	0.00200472
0.3288	0.00737784	-0.028753	-0.00165382
0.329	0.00723485	-0.0297369	0.00014669
0.3292	0.00730294	-0.0314205	0.00121664
0.3294	0.00743232	-0.0291247	-0.00100955
0.3296	0.00723485	-0.0302945	-0.00019558
0.3298	0.00731883	-0.0304694	0.00409284
0.33	0.00744139	-0.0275722	-0.00079096
0.3302	0.00733018	-0.0311472	0.00023585
0.3304	0.00734266	-0.0307099	0.00557409
0.3306	0.00750495	-0.0288842	0.00060976
0.3308	0.00731656	-0.0294964	0.00178037
0.331	0.00725187	-0.0306881	0.0049327
0.3312	0.0075197	-0.0272443	-0.00188104
0.3314	0.00723258	-0.0320656	0.00304878
0.3316	0.00725868	-0.0310926	0.0036988
0.3318	0.00725074	-0.0276378	-0.00033364
0.332	0.00734833	-0.032153	0.00528359
0.3322	0.00747998	-0.0312128	-0.0010642
0.3324	0.00733131	-0.028425	7.4781e-05
0.3326	0.00753445	-0.0275613	0.00201047
0.3328	0.0074221	-0.031016	0.00025023
0.333	0.00733245	-0.0288732	0.00442073
0.3332	0.00756283	-0.0308848	0.00388863
0.3334	0.00747771	-0.0276925	-0.00120801
0.3336	0.00751743	-0.0291684	0.00609468
0.3338	0.00753219	-0.0291356	0.00068454
0.334	0.00759347	-0.0286218	0.00172285
0.3342	0.00752538	-0.0325794	0.00562299
0.3344	0.00715881	-0.0292777	0.00059825
0.3346	0.00723598	-0.0285343	0.00343132
0.3348	0.00721555	-0.02989	0.00693741
0.335	0.00752765	-0.0299446	0.00139496
0.3352	0.00731429	-0.0273099	0.00174298
0.3354	0.00738919	-0.0290044	-0.00162793
0.3356	0.00738919	-0.0266976	0.00261447
0.3358	0.00718264	-0.0275722	0.00115336
0.336	0.00741075	-0.0277144	0.00540439
0.3362	0.00741075	-0.0282938	-0.00062414
0.3364	0.00725868	-0.0286983	0.00411585
0.3366	0.00752197	-0.0235053	-0.00031063
0.3368	0.00741302	-0.0268179	0.00349459
0.337	0.00742891	-0.0301961	0.00371894
0.3372	0.00747317	-0.0312347	-6.9029e-05
0.3374	0.00730407	-0.0281626	0.00395766
0.3376	0.00738579	-0.02907	0.00100955
0.3378	0.00747771	-0.0294855	0.00301427
0.338	0.00733472	-0.0264243	0.00218017
0.3382	0.0075197	-0.0307209	-0.00013231
0.3384	0.007396	-0.0286546	0.00446387
0.3386	0.00725868	-0.029234	0.00114473
0.3388	0.00749587	-0.0296604	0.00302289
0.339	0.00727457	-0.0281735	0.00427405
0.3392	0.00742551	-0.0300102	-0.00109008
0.3394	0.00741302	-0.0266758	-0.00068454
0.3396	0.0073472	-0.0291247	0.00520881
0.3398	0.0073438	-0.0295183	0.00035377
0.34	0.00737898	-0.0267523	-0.00027612
0.3402	0.00742097	-0.0291793	0.00479751
0.3404	0.00728819	-0.0295073	0.00075357
0.3406	0.00740508	-0.0283157	0.00099517
0.3408	0.00725301	-0.0299993	0.00320697
0.341	0.00740508	-0.0296823	0.00061263
0.3412	0.0072496	-0.0298572	0.00075644
0.3414	0.00742437	-0.0273973	0.00335078
0.3416	0.00741643	-0.0304038	0.00169696
0.3418	0.00752538	-0.0296385	0.00062414
0.342	0.0071974	-0.0281517	0.00286183
0.3422	0.00730975	-0.0309286	0.00259434
0.3424	0.0073994	-0.0278674	0.00095778
0.3426	0.00719399	-0.0317376	0.00400368
0.3428	0.00728138	-0.0280861	-0.00152727
0.343	0.00739146	-0.0308848	0.0010038
0.3432	0.00711909	-0.0297478	0.00122814
0.3434	0.00734266	-0.0299009	-0.00240451
0.3436	0.0072984	-0.0278784	0.00297112
0.3438	0.00718037	-0.0308083	-0.00102105
0.344	0.00718378	-0.0299993	0.00052635
0.3442	0.00711001	-0.0274192	0.00436321
0.3444	0.00758893	-0.030054	-0.00188967
0.3446	0.00755034	-0.0306225	-0.00120513
0.3448	0.00752878	-0.0271787	0.00011505
0.345	0.00725301	-0.0308958	-0.00135469
0.3452	0.00741983	-0.0316501	0.00222906
0.3454	0.0073733	-0.0302289	0.00374195
0.3456	0.00721328	-0.0320328	-0.00212264
0.3458	0.00740621	-0.0324919	0.00118787
0.346	0.00745047	-0.0284797	0.00306604
0.3462	0.0073018	-0.0316392	-0.00221756
0.3464	0.00738352	-0.0310707	0.00198171
0.3466	0.0073211	-0.0334759	0.00279567
0.3468	0.00720874	-0.0329183	-0.00157329
0.347	0.00740848	-0.026468	0.00184077
0.3472	0.00717129	-0.0279986	0.00079671
0.3474	0.00725187	-0.0298462	-0.00017257
0.3476	0.00737784	-0.0281298	0.00317821
0.3478	0.00735514	-0.0304366	0.00174298
0.348	0.00731429	-0.0314205	-0.00186954
0.3482	0.00739713	-0.0294745	0.00309768
0.3484	0.00728024	-0.0299774	-0.00077945
0.3486	0.00735968	-0.0307646	-0.00087149
0.3488	0.0075912	-0.0278784	0.00409572
0.349	0.00722917	-0.0309395	-0.00142372
0.3492	0.00747544	-0.0288623	0.00033364
0.3494	0.00748792	-0.0300102	0.00460481
0.3496	0.00723712	-0.0326231	0.0006644
0.3498	0.00752765	-0.0295511	0.00042568
0.35	0.00742891	-0.0293324	0.00449264
0.3502	0.00738125	-0.0308192	-0.00091176
0.3504	0.00756056	-0.030699	-0.00099804
0.3506	0.00737444	-0.0281517	0.00303152
0.3508	0.00729273	-0.0326122	0.00103543
0.351	0.00756056	-0.0280205	0.00037103
0.3512	0.0073699	-0.0286109	0.00391164
0.3514	0.00753219	-0.0307646	0.00188104
0.3516	0.00725981	-0.0285015	-0.00113323
0.3518	0.00736082	-0.027933	0.00471986
0.352	0.00741756	-0.0316173	-4.3143e-05
0.3522	0.00755829	-0.0284359	0.00241601
0.3524	0.00741075	-0.0283375	-8.0534e-05
0.3526	0.00758779	-0.030863	0.00222618
0.3528	0.00755829	-0.0290591	-4.6019e-05
0.353	0.00742551	-0.0281298	0.00402094
0.3532	0.00774327	-0.0312784	0.00151864
0.3534	0.00728932	-0.0272005	0.00144098
0.3536	0.00750381	-0.0300321	0.00602566
0.3538	0.0076173	-0.0298244	-4.0267e-05
0.354	0.00770015	-0.0280096	0.00596813
0.3542	0.00760709	-0.0315517	0.00047745
0.3544	0.0073211	-0.0328746	0.00358376
0.3546	0.0071747	-0.0288295	0.00376783
0.3548	0.00756623	-0.0281626	0.00643983
0.355	0.00741643	-0.0295401	0.00172572
0.3552	0.00740167	-0.0271131	0.00253682
0.3554	0.00746182	-0.0290919	-0.00057524
0.3556	0.00749927	-0.0281517	0.00446963
0.3558	0.00737898	-0.0265008	0.00235274
0.356	0.0075912	-0.0281079	0.00065578
0.3562	0.00744366	-0.0272224	0.00478313
0.3564	0.00744026	-0.0276816	1.4381e-05
0.3566	0.00755602	-0.0252108	0.00387138
0.3568	0.00746977	-0.0246313	0.00168833
0.357	0.00740281	-0.032153	0.00094915
0.3572	0.00748112	-0.0301414	0.00465083
0.3574	0.00752424	-0.0280533	-0.00046595
0.3576	0.00749019	-0.0293105	0.00429418
0.3578	0.00732564	-0.0269054	0.00023297
0.358	0.00754013	-0.0292231	0.00421652
0.3582	0.00747431	-0.0309504	-0.00025311
0.3584	0.00745274	-0.0284359	0.00402957
0.3586	0.0073994	-0.02778	0.00166532
0.3588	0.00756737	-0.0314643	0.00318971
0.359	0.00747771	-0.0264025	0.00422515
0.3592	0.00741189	-0.0299556	0.00092902
0.3594	0.00756737	-0.0280642	-0.00098366
0.3596	0.00738125	-0.0275176	0.00610331
0.3598	0.00754807	-0.0287092	0.00147262
0.36	0.00745161	-0.0263915	2.0133e-05
0.3602	0.00757758	-0.0286983	0.00566038
0.3604	0.00741302	-0.0292668	-0.00092902
0.3606	0.00750722	-0.0288951	0.00301139
0.3608	0.00743005	-0.0292012	-0.00162218
0.361	0.00756964	-0.0280096	0.00270651
0.3612	0.00743005	-0.0305787	0.00191843
0.3614	0.00753332	-0.0271131	0.00230384
0.3616	0.0075685	-0.028917	-0.00179188
0.3618	0.00755488	-0.0279877	0.00339393
0.362	0.00739033	-0.028097	-0.00131443
0.3622	0.00754013	-0.0301414	0.00165957
0.3624	0.00733926	-0.0275176	0.00442361
0.3626	0.00726095	-0.0303491	-0.00249655
0.3628	0.00744707	-0.027616	0.0021399
0.363	0.0072008	-0.0301414	0.00384549
0.3632	0.00735514	-0.0300321	-0.00091463
0.3634	0.00736763	-0.0268069	0.0011246
0.3636	0.0072496	-0.030043	0.00406408
0.3638	0.00733585	-0.0288514	-0.00192994
0.364	0.00724733	-0.0277034	0.00137483
0.3642	0.00706462	-0.028589	0.00089162
0.3644	0.00765021	-0.0296495	-0.00074781
0.3646	0.00772965	-0.028753	0.00347446
0.3648	0.00738011	-0.0297697	-0.00215428
0.365	0.00735287	-0.0298353	0.00015532
0.3652	0.00753105	-0.0289935	0.00325012
0.3654	0.00730634	-0.0318688	0.00291647
0.3656	0.00750495	-0.0295729	-0.00023873
0.3658	0.00745274	-0.0297697	0.0033968
0.366	0.00744026	-0.0313331	0.00058675
0.3662	0.00749019	-0.0309723	0.00104694
0.3664	0.00730634	-0.0296495	0.00169984
0.3666	0.00745728	-0.0337602	0.00046019
0.3668	0.00757304	-0.0307537	0.00017832
0.367	0.00733699	-0.026971	0.00490969
0.3672	0.00741189	-0.02989	-0.00222043
0.3674	0.00763546	-0.0287202	0.000302
0.3676	0.00736763	-0.0280533	0.00360101
0.3678	0.00746069	-0.0287311	-0.00322998
0.368	0.0076661	-0.0289279	2.8762e-05
0.3682	0.00742324	-0.0296713	0.0022607
0.3684	0.00747544	-0.0306553	-0.00291072
0.3686	0.0076627	-0.0278237	0.00261735
0.3688	0.00748452	-0.0300977	0.00313794
0.369	0.00752992	-0.0310488	-0.00077082
0.3692	0.00759347	-0.0290919	0.00216003
0.3694	0.00751176	-0.0316501	0.00276979
0.3696	0.00744253	-0.0301305	-0.00122239
0.3698	0.00763319	-0.0280096	0.00151289
0.37	0.00736649	-0.0296495	0.00515992
0.3702	0.00757872	-0.030054	-0.00023297
0.3704	0.00772625	-0.0288186	0.00070467
0.3706	0.00744253	-0.0306881	0.00666993
0.3708	0.00778072	-0.0293652	-0.0010153
0.371	0.00763092	-0.0284906	0.00100667
0.3712	0.00747544	-0.0302945	0.0049931
0.3714	0.00762071	-0.0287092	0.00046307
0.3716	0.00737103	-0.0285671	0.00524045
0.3718	0.00750949	-0.0307427	0.00073056
0.372	0.00757872	-0.0303929	0.00114185
0.3722	0.00762184	-0.0281189	0.00324149
0.3724	0.00749587	-0.0302726	-0.00111022
0.3726	0.00775235	-0.0299337	0.00361252
0.3728	0.00766837	-0.0269928	0.00099804
0.373	0.00744593	-0.0308083	0.00360676
0.3732	0.00770128	-0.0281626	0.00058099
0.3734	0.0075163	-0.0292231	0.00515416
0.3736	0.00776824	-0.0292777	-4.3143e-05
0.3738	0.00755829	-0.0270037	0.00548493
0.374	0.00783066	-0.0290372	0.00265762
0.3742	0.00766837	-0.0318579	0.00123389
0.3744	0.00746296	-0.0305678	0.00616659
0.3746	0.00743345	-0.0281517	0.00159342
0.3748	0.00761049	-0.028742	0.00332202
0.375	0.00758666	-0.0272224	0.00382248
0.3752	0.007497	-0.0288623	-0.00088875
0.3754	0.0076888	-0.029081	2.301e-05
0.3756	0.00754013	-0.0256372	0.0047515
0.3758	0.00757191	-0.0273208	-0.00011217
0.376	0.00775349	-0.0281954	0.00544179
0.3762	0.00752651	-0.0263806	0.00058099
0.3764	0.00750835	-0.026971	0.0027324
0.3766	0.00768426	-0.0231445	0.00431719
0.3768	0.00757077	-0.0275285	0.00273527
0.377	0.0075912	-0.0318688	4.3143e-05
0.3772	0.00764567	-0.0293105	0.00724229
0.3774	0.00746523	-0.0299556	-0.00188392
0.3776	0.00770809	-0.0287202	0.00605154
0.3778	0.00746863	-0.0287748	0.0028043
0.378	0.00757418	-0.029726	0.00164807
0.3782	0.00774554	-0.0305787	0.00402669
0.3784	0.00747204	-0.0286874	0.00027899
0.3786	0.0074448	-0.0293871	0.00203348
0.3788	0.00780002	-0.0294527	0.00615796
0.379	0.00751176	-0.0268397	0.00243902
0.3792	0.00743232	-0.0303819	0.00274965
0.3794	0.00762978	-0.0260307	-0.00049183
0.3796	0.00758552	-0.029398	0.00519443
0.3798	0.00776257	-0.0282063	0.00023873
0.38	0.00754126	-0.0263368	-0.00022434
0.3802	0.0075946	-0.0301524	0.00510527
0.3804	0.00743005	-0.0278018	0.00050334
0.3806	0.00765135	-0.0273099	0.00367004
0.3808	0.00744366	-0.0286327	-0.00104119
0.381	0.00763205	-0.0275176	0.00443511
0.3812	0.00742891	-0.0297588	0.00204498
0.3814	0.0075685	-0.0290919	0.0022118
0.3816	0.00778072	-0.0306553	0.00278992
0.3818	0.00736649	-0.029398	0.00230097
0.382	0.00753672	-0.0305787	-0.00211689
0.3822	0.00762071	-0.0284578	0.00286183
0.3824	0.00745047	-0.0287311	0.00310918
0.3826	0.00750381	-0.0288951	9.4915e-05
0.3828	0.00754807	-0.0287092	0.00213415
0.383	0.00750041	-0.0285671	-0.0001697
0.3832	0.00741302	-0.0298572	0.00119363
0.3834	0.0076173	-0.0273973	0.00300851
0.3836	0.00743799	-0.0296276	0.00024735
0.3838	0.00744026	-0.0295073	-0.00030488
0.384	0.00743345	-0.0269054	0.00203348
0.3842	0.00728138	-0.0275941	0.00314945
0.3844	0.00765702	-0.030054	-0.00213702
0.3846	0.00790443	-0.0289935	0.00192418
0.3848	0.00758552	-0.0309067	-0.00193281
0.385	0.00756964	-0.0297806	-0.00018983
0.3852	0.00764	-0.0282173	0.00622411
0.3854	0.00751062	-0.031344	0.00039404
0.3856	0.00760028	-0.0327762	0.00105557
0.3858	0.00772171	-0.0288623	0.00108145
0.386	0.00746523	-0.0315627	0.00090313
0.3862	0.00761617	-0.0296167	0.00123102
0.3864	0.00769334	-0.0284469	0.00387138
0.3866	0.00737103	-0.0338476	-0.00270939
0.3868	0.00765702	-0.0312238	-0.00033939
0.387	0.00769561	-0.0266758	0.00467959
0.3872	0.00748112	-0.028917	-0.00195582
0.3874	0.00759347	-0.0296495	0.00283019
0.3876	0.00753219	-0.0300977	0.00183502
0.3878	0.0076173	-0.0293871	-0.0024908
0.388	0.00770242	-0.0299556	0.00403244
0.3882	0.00752878	-0.027605	-0.0015963
0.3884	0.00754807	-0.0305897	-0.00109584
0.3886	0.0075685	-0.0287748	0.00396054
0.3888	0.00760368	-0.0292887	-0.00092039
0.389	0.00755602	-0.0314861	0.00110159
0.3892	0.00768653	-0.0279549	0.0054159
0.3894	0.007497	-0.031836	-0.00111597
0.3896	0.00750949	-0.0310926	0.00116199
0.3898	0.0076888	-0.0273427	0.00472273
0.39	0.00763659	-0.0313877	0.00096928
0.3902	0.0075424	-0.0319344	8.0534e-05
0.3904	0.00769901	-0.0278784	0.00468534
0.3906	0.00771717	-0.0313331	-0.00075644
0.3908	0.00755375	-0.0294855	0.00212552
0.391	0.00782725	-0.0265774	0.00524908
0.3912	0.00773873	-0.0296167	0.00115911
0.3914	0.00762865	-0.030863	0.00455016
0.3916	0.00762525	-0.0265774	0.00340543
0.3918	0.00757418	-0.0304913	-0.00170272
0.392	0.00776824	-0.031027	0.00534975
0.3922	0.00757985	-0.0274411	0.00045156
0.3924	0.00765362	-0.0289388	-0.00121664
0.3926	0.00782385	-0.0277362	0.00467096
0.3928	0.00771717	-0.0277253	0.00281868
0.393	0.00785676	-0.0294855	0.00083698
0.3932	0.00763432	-0.0280314	0.00572078
0.3934	0.00769107	-0.0275067	0.00056086
0.3936	0.00796798	-0.0307427	0.00219455
0.3938	0.0075912	-0.0284359	0.00583583
0.394	0.00804175	-0.0278237	0.00164807
0.3942	0.00785222	-0.0322077	0.00498447
0.3944	0.00751289	-0.0281735	0.00429418
0.3946	0.00737671	-0.0292012	0.00124827
0.3948	0.00767858	-0.0303382	0.00850207
0.395	0.00763886	-0.0260854	0.00139208
0.3952	0.00764567	-0.0285015	0.00134319
0.3954	0.00772171	-0.0286546	0.00073919
0.3956	0.00761049	-0.027124	0.00451565
0.3958	0.00783293	-0.0275395	0.0002416
0.396	0.0076661	-0.0276597	0.00498734
0.3962	0.00752197	-0.0277472	-0.0005321
0.3964	0.00777164	-0.0268725	0.00480327
0.3966	0.00757645	-0.0249593	0.00373332
0.3968	0.00784087	-0.0253857	0.00063852
0.397	0.00767858	-0.0306881	0.00402382
0.3972	0.00763546	-0.0305022	0.00281868
0.3974	0.00779661	-0.027288	0.00148988
0.3976	0.00757531	-0.0311472	0.00729982
0.3978	0.00770469	-0.0282173	0.00153877
0.398	0.00763205	-0.0289716	0.00157904
0.3982	0.00768993	-0.0289935	0.00564024
0.3984	0.00771263	-0.026643	0.00079383
0.3986	0.00744253	-0.0292996	0.00172285
0.3988	0.00784201	-0.026479	0.0074954
0.399	0.0076434	-0.0276597	0.00228946
0.3992	0.00750495	-0.0310379	0.00134031
0.3994	0.00770242	-0.0268835	0.00094915
[truncated: 35,502 more rows]

## Sheet: Fig.S1H
MCF-7
mtRFP	RFP-GPI
0.85	-0.03
0.84	-0.071
0.811	-0.003
0.867	-0.03
0.898	-0.012
0.878	-0.085
0.795	0.016
0.785	-0.033
0.739	-0.015
0.824	-0.082
0.893	-0.033
0.861	-0.074
0.903	-0.017
0.847	-0.004
0.896	-0.112
0.836	-0.139
0.877
0.896

## Sheet: Fig.S1J
	MCF-7 + BKCa - RFP
Time (sec)	ctrl	+ PAX	+ IBTX
0	-0.0774643	-0.00808601	-0.0288979
0.0002	-0.0764118	-0.00793977	-0.0284922
0.0004	-0.074985	-0.00844887	-0.0290653
0.0006	-0.0773473	-0.00835409	-0.0289858
0.0008	-0.0740963	-0.00785041	-0.0294398
0.001	-0.0762948	-0.00820516	-0.0299931
0.0012	-0.0791951	-0.00749296	-0.0291419
0.0014	-0.075102	-0.00795873	-0.0292497
0.0016	-0.0787507	-0.00761482	-0.029122
0.0018	-0.0755464	-0.00740901	-0.0284269
0.002	-0.0742366	-0.00827827	-0.029437
0.0022	-0.0760609	-0.00886861	-0.0294994
0.0024	-0.0744939	-0.00827286	-0.0291192
0.0026	-0.0740729	-0.00857344	-0.0290624
0.0028	-0.0764351	-0.00809142	-0.029122
0.003	-0.0766223	-0.0079831	-0.0285915
0.0032	-0.0754762	-0.00839742	-0.0286681
0.0034	-0.0779086	-0.0077096	-0.0290936
0.0036	-0.0741898	-0.00791269	-0.0285092
0.0038	-0.0771836	-0.00786124	-0.0292894
0.004	-0.0744705	-0.00786666	-0.0293235
0.0042	-0.0733946	-0.00801831	-0.028861
0.0044	-0.0755464	-0.00744963	-0.0289234
0.0046	-0.0752657	-0.00758232	-0.0292923
0.0048	-0.0752657	-0.00757149	-0.0285688
0.005	-0.0770199	-0.00806163	-0.0286624
0.0052	-0.0740261	-0.00806705	-0.0287844
0.0054	-0.0744003	-0.00834597	-0.0283077
0.0056	-0.0739091	-0.00813746	-0.0287248
0.0058	-0.0787507	-0.0079154	-0.0284978
0.006	-0.0784466	-0.00796144	-0.0291504
0.0062	-0.0740963	-0.00766356	-0.0294171
0.0064	-0.0744237	-0.0080508	-0.0282822
0.0066	-0.075406	-0.00803185	-0.0289972
0.0068	-0.0743769	-0.00795602	-0.0279247
0.007	-0.0751254	-0.00793977	-0.0287617
0.0072	-0.0781893	-0.00786124	-0.0284581
0.0074	-0.0742132	-0.00724112	-0.0281176
0.0076	-0.0778151	-0.00798039	-0.02818
0.0078	-0.0749149	-0.00798581	-0.0279275
0.008	-0.0759908	-0.00830535	-0.0281488
0.0082	-0.074681	-0.00793707	-0.0283786
0.0084	-0.0734414	-0.0076419	-0.0282964
0.0086	-0.0754762	-0.00794519	-0.0284609
0.0088	-0.0770433	-0.00764731	-0.0284212
0.009	-0.0756399	-0.00780438	-0.0284553
0.0092	-0.0761077	-0.00830535	-0.0282822
0.0094	-0.0757101	-0.00809413	-0.0287588
0.0096	-0.0736752	-0.00845971	-0.0284099
0.0098	-0.0770199	-0.00829994	-0.0281971
0.01	-0.0739325	-0.00770418	-0.0284184
0.0102	-0.0753826	-0.0082214	-0.0290029
0.0104	-0.0748447	-0.00802643	-0.0281942
0.0106	-0.0762948	-0.00764731	-0.0284411
0.0108	-0.0750786	-0.00786666	-0.0286085
0.011	-0.0759674	-0.00814558	-0.0282737
0.0112	-0.0746342	-0.00831618	-0.0281176
0.0114	-0.0722953	-0.00744422	-0.0286567
0.0116	-0.0734414	-0.00790999	-0.0288213
0.0118	-0.0778385	-0.00782875	-0.0290426
0.012	-0.0748447	-0.00808871	-0.0283418
0.0122	-0.0771368	-0.00745505	-0.0283276
0.0124	-0.0746342	-0.00771772	-0.0286794
0.0126	-0.0749149	-0.0079154	-0.0283276
0.0128	-0.074985	-0.00792894	-0.0283843
0.013	-0.0739325	-0.00798852	-0.0286964
0.0132	-0.07709	-0.00794519	-0.0287447
0.0134	-0.0769263	-0.00814287	-0.0287929
0.0136	-0.0762247	-0.00886861	-0.0285148
0.0138	-0.0749149	-0.00885778	-0.0284893
0.014	-0.0769497	-0.00870342	-0.0291759
0.0142	-0.0756399	-0.00850303	-0.028478
0.0144	-0.0777917	-0.00825119	-0.0286
0.0146	-0.0805516	-0.00947249	-0.0288752
0.0148	-0.0758504	-0.00904192	-0.029071
0.015	-0.0781191	-0.00862218	-0.0285744
0.0152	-0.075523	-0.00890652	-0.028651
0.0154	-0.0777683	-0.00885778	-0.0282567
0.0156	-0.0780022	-0.00864114	-0.028844
0.0158	-0.0728333	-0.00890652	-0.0290965
0.016	-0.0752189	-0.00855719	-0.0297093
0.0162	-0.0755698	-0.00819703	-0.0283645
0.0164	-0.0757803	-0.00832972	-0.028302
0.0166	-0.0748915	-0.00834326	-0.0285744
0.0168	-0.0778619	-0.00856802	-0.0284382
0.017	-0.0765989	-0.00929647	-0.0286312
0.0172	-0.076365	-0.00870342	-0.0290936
0.0174	-0.0772304	-0.00893902	-0.0293518
0.0176	-0.0747745	-0.0086276	-0.0289745
0.0178	-0.0751254	-0.00810496	-0.0288213
0.018	-0.0789144	-0.00889027	-0.0284723
0.0182	-0.0757335	-0.00847054	-0.0290284
0.0184	-0.0782127	-0.00831077	-0.0292015
0.0186	-0.0776748	-0.00853553	-0.0285205
0.0188	-0.0734881	-0.00826473	-0.0287049
0.019	-0.0776748	-0.00832431	-0.0293462
0.0192	-0.0796628	-0.00875487	-0.028041
0.0194	-0.075523	-0.00853553	-0.028844
0.0196	-0.0773707	-0.00795061	-0.0285461
0.0198	-0.0763416	-0.00816183	-0.0285546
0.02	-0.073722	-0.00857073	-0.0285971
0.0202	-0.0788208	-0.00770147	-0.0281403
0.0204	-0.0744939	-0.00836222	-0.028844
0.0206	-0.0751488	-0.00809955	-0.0287447
0.0208	-0.0749382	-0.00788832	-0.0281432
0.021	-0.0770199	-0.00822682	-0.0288695
0.0212	-0.0761311	-0.00836763	-0.0290142
0.0214	-0.0769029	-0.00810496	-0.0285007
0.0216	-0.0778853	-0.00803997	-0.0283134
0.0218	-0.0746576	-0.00779896	-0.0284638
0.022	-0.0762247	-0.00831618	-0.0281659
0.0222	-0.0754762	-0.00889569	-0.0289575
0.0224	-0.0759908	-0.00790186	-0.0289858
0.0226	-0.0759674	-0.00800477	-0.0288894
0.0228	-0.0751955	-0.00842721	-0.0296214
0.023	-0.0754762	-0.00803455	-0.0289064
0.0232	-0.078353	-0.00855719	-0.028739
0.0234	-0.0729268	-0.00865739	-0.0284978
0.0236	-0.0765521	-0.00821599	-0.0288213
0.0238	-0.0757803	-0.00860052	-0.0287929
0.024	-0.072997	-0.00871155	-0.0290312
0.0242	-0.0754528	-0.00809955	-0.0283333
0.0244	-0.075406	-0.00771501	-0.0292951
0.0246	-0.072997	-0.00746588	-0.0288525
0.0248	-0.0768561	-0.00739818	-0.0278566
0.025	-0.074681	-0.00824307	-0.0287588
0.0252	-0.077511	-0.00780708	-0.0294597
0.0254	-0.0752189	-0.00752275	-0.0284638
0.0256	-0.0728333	-0.0076094	-0.028844
0.0258	-0.0761545	-0.00753087	-0.0292582
0.026	-0.0786337	-0.00783687	-0.028966
0.0262	-0.0778385	-0.00765002	-0.0288667
0.0264	-0.0749382	-0.00781521	-0.0289518
0.0266	-0.0739793	-0.00814016	-0.0293377
0.0268	-0.0760609	-0.00830806	-0.0289064
0.027	-0.0725994	-0.00754983	-0.0284893
0.0272	-0.0780022	-0.00752816	-0.0288667
0.0274	-0.0750318	-0.0071003	-0.0297774
0.0276	-0.0765989	-0.00757149	-0.0286312
0.0278	-0.0746108	-0.00811579	-0.0287276
0.028	-0.0739559	-0.00793977	-0.0289546
0.0282	-0.0767626	-0.00855448	-0.0281659
0.0284	-0.0728333	-0.00841367	-0.0287645
0.0286	-0.0744939	-0.00847866	-0.0286255
0.0288	-0.0770199	-0.00848679	-0.0292554
0.029	-0.0723655	-0.00855448	-0.0292185
0.0292	-0.0742366	-0.00815912	-0.027692
0.0294	-0.0748213	-0.00799935	-0.0288582
0.0296	-0.07426	-0.00851116	-0.0285915
0.0298	-0.0766223	-0.00837576	-0.0280864
0.03	-0.0748915	-0.00857615	-0.0288667
0.0302	-0.0749382	-0.00785312	-0.0290993
0.0304	-0.0730204	-0.00783146	-0.0288355
0.0306	-0.0770433	-0.00814558	-0.0289972
0.0308	-0.073418	-0.00773126	-0.0280382
0.031	-0.0764351	-0.00814016	-0.0287021
0.0312	-0.076248	-0.00834055	-0.0288156
0.0314	-0.0768561	-0.00844075	-0.0275104
0.0316	-0.0754294	-0.00799664	-0.0294341
0.0318	-0.0747277	-0.0075065	-0.0295334
0.032	-0.0759674	-0.00789916	-0.0286198
0.0322	-0.0772538	-0.00802643	-0.0286681
0.0324	-0.0750786	-0.0076094	-0.0285773
0.0326	-0.0774877	-0.00779354	-0.0284723
0.0328	-0.0756165	-0.00771772	-0.0290312
0.033	-0.0762247	-0.0077448	-0.0287844
0.0332	-0.0771602	-0.00760399	-0.0297434
0.0334	-0.0770667	-0.00756607	-0.0290908
0.0336	-0.0744003	-0.00761211	-0.0291447
0.0338	-0.0771134	-0.00767439	-0.0280836
0.034	-0.0760375	-0.00811038	-0.0292611
0.0342	-0.0768094	-0.00782604	-0.028617
0.0344	-0.0771602	-0.00831077	-0.0282737
0.0346	-0.078353	-0.00821328	-0.0293206
0.0348	-0.077511	-0.00789374	-0.0293859
0.035	-0.0785635	-0.00809413	-0.0289915
0.0352	-0.0771368	-0.00819432	-0.0302257
0.0354	-0.0787507	-0.00807247	-0.0288497
0.0356	-0.077932	-0.00791269	-0.0295391
0.0358	-0.0744939	-0.00822953	-0.0287049
0.036	-0.0733244	-0.00759857	-0.0287106
0.0362	-0.0812299	-0.00790186	-0.0293518
0.0364	-0.0747745	-0.00780167	-0.0285631
0.0366	-0.0764118	-0.00771772	-0.0286681
0.0368	-0.0749149	-0.00838659	-0.0291958
0.037	-0.0785168	-0.00851386	-0.0295902
0.0372	-0.0759674	-0.00763648	-0.0282737
0.0374	-0.079733	-0.00831347	-0.0301009
0.0376	-0.075406	-0.00769877	-0.0290397
0.0378	-0.0760609	-0.00760669	-0.0286368
0.038	-0.0791483	-0.00762294	-0.0289348
0.0382	-0.0790781	-0.00744692	-0.0295136
0.0384	-0.0765053	-0.00757691	-0.0289943
0.0386	-0.0773941	-0.00804268	-0.028478
0.0388	-0.0751488	-0.00745776	-0.028617
0.039	-0.0779086	-0.00765273	-0.029122
0.0392	-0.0776046	-0.0072357	-0.029366
0.0394	-0.0753826	-0.00734131	-0.029
0.0396	-0.0769497	-0.00743068	-0.0285546
0.0398	-0.0776046	-0.00797227	-0.0291674
0.04	-0.0759206	-0.00809684	-0.0283333
0.0402	-0.0790781	-0.00832431	-0.028895
0.0404	-0.0764585	-0.00798039	-0.0296895
0.0406	-0.0776748	-0.00777188	-0.0288241
0.0408	-0.0767158	-0.00785312	-0.0279616
0.041	-0.0772772	-0.00784229	-0.0290823
0.0412	-0.0757101	-0.00828098	-0.0289177
0.0414	-0.0764351	-0.00773397	-0.0301236
0.0416	-0.0760375	-0.00774209	-0.0293887
0.0418	-0.0753593	-0.00739006	-0.028651
0.042	-0.077628	-0.00757961	-0.0287447
0.0422	-0.0751488	-0.00729528	-0.0295306
0.0424	-0.0753593	-0.00741172	-0.0285461
0.0426	-0.0773239	-0.00713551	-0.0297235
0.0428	-0.0746576	-0.00714634	-0.0292327
0.043	-0.0779788	-0.00737381	-0.0295391
0.0432	-0.0754762	-0.0071003	-0.0294824
0.0434	-0.0773941	-0.00670765	-0.0290369
0.0436	-0.0739559	-0.00706239	-0.0293093
0.0438	-0.0745172	-0.00714092	-0.0294597
0.044	-0.0745406	-0.00739818	-0.028861
0.0442	-0.077511	-0.00766356	-0.0282935
0.0444	-0.0757335	-0.00725466	-0.0291759
0.0446	-0.0740027	-0.00734673	-0.0293377
0.0448	-0.0751488	-0.00718154	-0.0294909
0.045	-0.074143	-0.00765002	-0.0295051
0.0452	-0.07426	-0.00847054	-0.0283872
0.0454	-0.0740963	-0.00792082	-0.0285546
0.0456	-0.0744705	-0.00755524	-0.029366
0.0458	-0.0759206	-0.00715446	-0.0294143
0.046	-0.0772772	-0.00768793	-0.0297093
0.0462	-0.0777683	-0.00704073	-0.0294965
0.0464	-0.0715468	-0.00753087	-0.0287588
0.0466	-0.0755464	-0.00760128	-0.0294256
0.0468	-0.0738624	-0.00750108	-0.0290029
0.047	-0.0768561	-0.00707322	-0.0286113
0.0472	-0.0764351	-0.00714905	-0.0291305
0.0474	-0.072997	-0.00741714	-0.0286397
0.0476	-0.0762247	-0.00737922	-0.0289461
0.0478	-0.0751955	-0.00757149	-0.0296044
0.048	-0.0758504	-0.00828369	-0.0290369
0.0482	-0.0755931	-0.00763107	-0.029366
0.0484	-0.0751254	-0.00784229	-0.0288298
0.0486	-0.0735583	-0.00782062	-0.0289177
0.0488	-0.074985	-0.00868718	-0.0284042
0.049	-0.071617	-0.00872238	-0.0290653
0.0492	-0.0733946	-0.00827827	-0.0289688
0.0494	-0.0730671	-0.0077773	-0.0288156
0.0496	-0.0752423	-0.00767439	-0.0295306
0.0498	-0.0741664	-0.00800206	-0.0286113
0.05	-0.07426	-0.00801018	-0.0290227
0.0502	-0.0738858	-0.00796685	-0.0293377
0.0504	-0.075406	-0.00785854	-0.0290114
0.0506	-0.07709	-0.00739006	-0.0289887
0.0508	-0.0743068	-0.00727091	-0.0292384
0.051	-0.0781191	-0.00678347	-0.028895
0.0512	-0.0759674	-0.00721675	-0.0287957
0.0514	-0.0771602	-0.00711384	-0.0295618
0.0516	-0.0748681	-0.00717613	-0.0290029
0.0518	-0.0771134	-0.00718967	-0.0296072
0.052	-0.0746108	-0.0075417	-0.0287844
0.0522	-0.0770199	-0.00684846	-0.0274707
0.0524	-0.0765053	-0.00769877	-0.0284978
0.0526	-0.0764118	-0.00793436	-0.0294852
0.0528	-0.0764819	-0.00770689	-0.0285404
0.053	-0.0723889	-0.00810225	-0.0289603
0.0532	-0.0767626	-0.00801831	-0.0289688
0.0534	-0.0744471	-0.00754712	-0.0293008
0.0536	-0.0758738	-0.00800477	-0.0289291
0.0538	-0.0769731	-0.00812392	-0.0294455
0.054	-0.0747511	-0.00764731	-0.0296327
0.0542	-0.0754996	-0.00831347	-0.0282652
0.0544	-0.0785402	-0.00825661	-0.0292298
0.0546	-0.0768795	-0.0085599	-0.0285234
0.0548	-0.075523	-0.00877112	-0.0292951
0.055	-0.0767158	-0.00744422	-0.0291703
0.0552	-0.0762948	-0.00744151	-0.028651
0.0554	-0.0790781	-0.00812121	-0.0288383
0.0556	-0.0786805	-0.00825932	-0.0282794
0.0558	-0.0731841	-0.00759857	-0.0292497
0.056	-0.0741664	-0.00788291	-0.0293462
0.0562	-0.0751488	-0.00799935	-0.0289007
0.0564	-0.0736519	-0.00772314	-0.0290114
0.0566	-0.0777917	-0.00775022	-0.0286993
0.0568	-0.0758036	-0.00724924	-0.0280098
0.057	-0.0753125	-0.00727632	-0.029454
0.0572	-0.0784232	-0.00725737	-0.0300328
0.0574	-0.0762247	-0.00717071	-0.0292781
0.0576	-0.0760843	-0.00710843	-0.0292213
0.0578	-0.0789144	-0.00720321	-0.0289858
0.058	-0.0756633	-0.00702177	-0.0284354
0.0582	-0.0779086	-0.00769335	-0.0289717
0.0584	-0.0789144	-0.00829181	-0.0291078
0.0586	-0.0759674	-0.00845429	-0.0281829
0.0588	-0.075406	-0.0082864	-0.029542
0.059	-0.0777449	-0.00821057	-0.0296413
0.0592	-0.0760375	-0.00794248	-0.0286595
0.0594	-0.0783998	-0.00843804	-0.029088
0.0596	-0.0778151	-0.00845971	-0.0290057
0.0598	-0.0786805	-0.00800206	-0.0291646
0.06	-0.0765287	-0.00789645	-0.0290511
0.0602	-0.0782127	-0.00787478	-0.0290029
0.0604	-0.0755464	-0.00798852	-0.0296668
0.0606	-0.0781659	-0.00815641	-0.0295249
0.0608	-0.0776981	-0.0082891	-0.0289404
0.061	-0.077511	-0.00763919	-0.029559
0.0612	-0.0746108	-0.00790457	-0.0293972
0.0614	-0.0771602	-0.0080833	-0.0287674
0.0616	-0.0770199	-0.00802914	-0.0289036
0.0618	-0.074681	-0.00820245	-0.0293121
0.062	-0.0763182	-0.00825661	-0.028268
0.0622	-0.0754996	-0.00816995	-0.0289915
0.0624	-0.0757335	-0.00826744	-0.0293802
0.0626	-0.0744237	-0.00799123	-0.0297462
0.0628	-0.0772538	-0.00793977	-0.0286908
0.063	-0.076786	-0.00755253	-0.0287163
0.0632	-0.0747745	-0.00753629	-0.0288723
0.0634	-0.072576	-0.00795602	-0.0290993
0.0636	-0.075406	-0.00788562	-0.0285461
0.0638	-0.0733946	-0.00818078	-0.029454
0.064	-0.075523	-0.00874133	-0.0297576
0.0642	-0.0750084	-0.00854636	-0.0295079
0.0644	-0.0761545	-0.00791811	-0.0278367
0.0646	-0.0762013	-0.00812662	-0.0289291
0.0648	-0.075523	-0.00780979	-0.0289291
0.065	-0.0732309	-0.00835409	-0.0292809
0.0652	-0.0733946	-0.00834326	-0.0294767
0.0654	-0.072459	-0.00800206	-0.0286822
0.0656	-0.0754528	-0.0085274	-0.0285574
0.0658	-0.078774	-0.00860323	-0.0299221
0.066	-0.078774	-0.00868988	-0.0291731
0.0662	-0.0781425	-0.00867634	-0.0287588
0.0664	-0.0747511	-0.00826744	-0.0297973
0.0666	-0.0785869	-0.0080156	-0.0287645
0.0668	-0.0740729	-0.00833785	-0.0284836
0.067	-0.0748213	-0.00833243	-0.0292923
0.0672	-0.076365	-0.00816995	-0.028512
0.0674	-0.0763182	-0.00808601	-0.0284155
0.0676	-0.0732543	-0.00793707	-0.0295476
0.0678	-0.0786103	-0.00756878	-0.0284553
0.068	-0.0736519	-0.00795873	-0.0291986
0.0682	-0.0726695	-0.00772584	-0.0287957
0.0684	-0.0747979	-0.00791811	-0.0286908
0.0686	-0.0735349	-0.00793977	-0.0294341
0.0688	-0.074564	-0.00783687	-0.0276438
0.069	-0.0760609	-0.00780708	-0.0279701
0.0692	-0.0737454	-0.00835139	-0.0286056
0.0694	-0.074564	-0.00806976	-0.029715
0.0696	-0.0739325	-0.00813475	-0.0286368
0.0698	-0.0739325	-0.00851386	-0.0293774
0.07	-0.0759674	-0.00853011	-0.0288128
0.0702	-0.0753359	-0.00810225	-0.0289858
0.0704	-0.0759674	-0.00778813	-0.0292384
0.0706	-0.0752423	-0.00785312	-0.028129
0.0708	-0.0747277	-0.00793977	-0.0283389
0.071	-0.0774409	-0.00780708	-0.0299931
0.0712	-0.0739091	-0.00842992	-0.0281205
0.0714	-0.0768795	-0.00872509	-0.0289121
0.0716	-0.0745172	-0.00820516	-0.0287248
0.0718	-0.074985	-0.00837847	-0.0283389
0.072	-0.0778385	-0.00828369	-0.0287163
0.0722	-0.0741664	-0.00775563	-0.0288695
0.0724	-0.0761545	-0.00844346	-0.0289773
0.0726	-0.0739793	-0.00828098	-0.0295646
0.0728	-0.0725058	-0.00836763	-0.0292554
0.073	-0.0759908	-0.00830806	-0.029193
0.0732	-0.0776748	-0.00812662	-0.0288582
0.0734	-0.0776748	-0.00834055	-0.0290227
0.0736	-0.0748213	-0.00842179	-0.0294001
0.0738	-0.0758738	-0.00805893	-0.0283843
0.074	-0.0760609	-0.00841367	-0.0291986
0.0742	-0.0771368	-0.00799935	-0.029122
0.0744	-0.0765521	-0.00769335	-0.0290483
0.0746	-0.0769263	-0.00807788	-0.0296044
0.0748	-0.078049	-0.00790999	-0.0281347
0.075	-0.0733478	-0.00732236	-0.029122
0.0752	-0.0779788	-0.00783146	-0.0294455
0.0754	-0.0784934	-0.00832701	-0.0282992
0.0756	-0.0782361	-0.0081185	-0.029332
0.0758	-0.0760843	-0.00842179	-0.0285517
0.076	-0.0758504	-0.0086953	-0.0293178
0.0762	-0.0776981	-0.00841638	-0.0291589
0.0764	-0.0760375	-0.00814558	-0.0287986
0.0766	-0.077511	-0.00793436	-0.0291362
0.0768	-0.0742834	-0.00765544	-0.0284893
0.077	-0.0791015	-0.00736298	-0.0286908
0.0772	-0.0766924	-0.0077096	-0.0293008
0.0774	-0.0755698	-0.00827556	-0.0285744
0.0776	-0.0786805	-0.00757961	-0.0286908
0.0778	-0.0781191	-0.00745505	-0.0295136
0.078	-0.074681	-0.00728986	-0.0293802
0.0782	-0.077207	-0.00723029	-0.0291504
0.0784	-0.0764819	-0.00733319	-0.0292157
0.0786	-0.075406	-0.00808601	-0.028966
0.0788	-0.0752189	-0.00808871	-0.0295363
0.079	-0.0764351	-0.00800747	-0.0292923
0.0792	-0.0780958	-0.00769606	-0.0283106
0.0794	-0.0773239	-0.00782333	-0.0288099
0.0796	-0.074681	-0.00803726	-0.028512
0.0798	-0.0756399	-0.00805622	-0.0295618
0.08	-0.0770433	-0.00792623	-0.0286936
0.0802	-0.0781659	-0.00853282	-0.0288156
0.0804	-0.0759674	-0.00815641	-0.0291589
0.0806	-0.0781893	-0.00746588	-0.0293121
0.0808	-0.074985	-0.00776917	-0.0289149
0.081	-0.0783297	-0.00800747	-0.0288355
0.0812	-0.078891	-0.00746588	-0.0298597
0.0814	-0.0752423	-0.00758232	-0.0302853
0.0816	-0.0774175	-0.00844887	-0.028844
0.0818	-0.0776514	-0.00845429	-0.0291845
0.082	-0.0764585	-0.00841909	-0.0294171
0.0822	-0.0757569	-0.00835139	-0.0286454
0.0824	-0.076786	-0.00844617	-0.0293944
0.0826	-0.0764819	-0.00786395	-0.028878
0.0828	-0.0782595	-0.00818349	-0.0287361
0.083	-0.0790781	-0.00796956	-0.0300186
0.0832	-0.0746576	-0.00805622	-0.0285631
0.0834	-0.0752657	-0.00803726	-0.0292355
0.0836	-0.0765989	-0.00768523	-0.0299931
0.0838	-0.0759206	-0.00721133	-0.0297746
0.084	-0.0733478	-0.00723841	-0.0290227
0.0842	-0.0758036	-0.00754712	-0.0292469
0.0844	-0.0768795	-0.00778542	-0.0292639
0.0846	-0.0754762	-0.0069297	-0.0289121
0.0848	-0.0754528	-0.00732777	-0.0296271
0.085	-0.0736519	-0.00802914	-0.0294398
0.0852	-0.0762247	-0.00782604	-0.0285404
0.0854	-0.0702371	-0.00808059	-0.0291901
0.0856	-0.074143	-0.00801831	-0.0288071
0.0858	-0.0804347	-0.00782875	-0.028285
0.086	-0.074681	-0.00814016	-0.0288241
0.0862	-0.0744471	-0.00781792	-0.0285007
0.0864	-0.0740963	-0.00798852	-0.0287333
0.0866	-0.073418	-0.0083216	-0.0289575
0.0868	-0.0755931	-0.00814829	-0.0286227
0.087	-0.0732543	-0.00759857	-0.028617
0.0872	-0.0763182	-0.00776917	-0.0289092
0.0874	-0.0771368	-0.00756337	-0.0283304
0.0876	-0.0731139	-0.00761211	-0.0282084
0.0878	-0.0751721	-0.00782604	-0.0295817
0.088	-0.0736752	-0.00727632	-0.0286198
0.0882	-0.0749616	-0.00725195	-0.0291816
0.0884	-0.0752189	-0.00734402	-0.029349
0.0886	-0.0755698	-0.00710572	-0.0282538
0.0888	-0.0772304	-0.00727632	-0.0293348
0.089	-0.0703306	-0.00726278	-0.028983
0.0892	-0.07426	-0.00726549	-0.0293036
0.0894	-0.0741898	-0.00706239	-0.0294426
0.0896	-0.0744705	-0.00701906	-0.0291163
0.0898	-0.0780022	-0.00693512	-0.0281687
0.09	-0.0751254	-0.00678889	-0.0287475
0.0902	-0.0764819	-0.00701906	-0.0283474
0.0904	-0.0728333	-0.00711655	-0.0290965
0.0906	-0.0756399	-0.00735756	-0.0294284
0.0908	-0.0748681	-0.00698386	-0.028634
0.091	-0.0778853	-0.00630687	-0.0286737
0.0912	-0.077511	-0.00686742	-0.0287475
0.0914	-0.0768328	-0.00622292	-0.0281602
0.0916	-0.0740963	-0.00691887	-0.0291107
0.0918	-0.0757803	-0.00677535	-0.0287503
0.092	-0.076248	-0.00679159	-0.0293065
0.0922	-0.0752423	-0.00686471	-0.0295817
0.0924	-0.0751721	-0.00715988	-0.028529
0.0926	-0.0734881	-0.00736027	-0.0285489
0.0928	-0.076669	-0.00715717	-0.0286936
0.093	-0.0752189	-0.00757691	-0.028024
0.0932	-0.0753125	-0.00746588	-0.0291646
0.0934	-0.0759908	-0.00705698	-0.0296214
0.0936	-0.0762013	-0.00749025	-0.0291476
0.0938	-0.0747979	-0.00762294	-0.0286652
0.094	-0.077511	-0.00699469	-0.0287503
0.0942	-0.0778619	-0.00758232	-0.0286539
0.0944	-0.0767392	-0.0073034	-0.0291788
0.0946	-0.0764118	-0.0076094	-0.0289007
0.0948	-0.0775578	-0.00793977	-0.0281942
0.095	-0.077511	-0.00687013	-0.0290908
0.0952	-0.07847	-0.00705968	-0.0287617
0.0954	-0.0807621	-0.00735756	-0.0288525
0.0956	-0.0774877	-0.00741443	-0.0292213
0.0958	-0.0752657	-0.00729528	-0.0288411
0.096	-0.0762948	-0.00730882	-0.028634
0.0962	-0.0759206	-0.0071003	-0.0291277
0.0964	-0.0765521	-0.00713821	-0.0286454
0.0966	-0.0749616	-0.00684305	-0.0282652
0.0968	-0.0726227	-0.00637727	-0.0291759
0.097	-0.0782829	-0.00731965	-0.0284127
0.0972	-0.0776981	-0.0070976	-0.0292866
0.0974	-0.0754528	-0.00749025	-0.0292185
0.0976	-0.0777683	-0.00807788	-0.0283843
0.0978	-0.0780256	-0.00758232	-0.0291447
0.098	-0.0754294	-0.0078477	-0.0295193
0.0982	-0.0772538	-0.00824036	-0.0284695
0.0984	-0.0786805	-0.00811038	-0.028722
0.0986	-0.0768795	-0.00824848	-0.0285773
0.0988	-0.0758036	-0.00834597	-0.0286255
0.099	-0.0748213	-0.00758232	-0.0297661
0.0992	-0.0778619	-0.00795602	-0.0291022
0.0994	-0.0799903	-0.00788291	-0.0277885
0.0996	-0.0735583	-0.00784229	-0.0288638
0.0998	-0.0782829	-0.00779896	-0.0288638
0.1	-0.0676877	-0.00225845	-0.0282084
0.1002	-0.116711	-0.00934521	-0.0153526
0.1004	-0.118839	-0.0151701	-0.0143993
0.1006	-0.113717	-0.0140381	-0.0206243
0.1008	-0.111378	-0.0129441	-0.0260436
0.101	-0.109226	-0.0128656	-0.0281517
0.1012	-0.110466	-0.0129224	-0.0297661
0.1014	-0.106537	-0.0124269	-0.0310457
0.1016	-0.1078	-0.0121913	-0.0296554
0.1018	-0.109647	-0.0113708	-0.0309606
0.102	-0.107098	-0.0118013	-0.0313323
0.1022	-0.10635	-0.0113139	-0.0306485
0.1024	-0.109063	-0.0111514	-0.0301888
0.1026	-0.109764	-0.0107804	-0.0306343
0.1028	-0.108127	-0.0103634	-0.0300073
0.103	-0.110583	-0.0106613	-0.0303052
0.1032	-0.107051	-0.0106261	-0.0303789
0.1034	-0.10801	-0.0100493	-0.0293008
0.1036	-0.110022	-0.0101901	-0.0294058
0.1038	-0.105367	-0.0107994	-0.0299023
0.104	-0.106233	-0.0108481	-0.0301293
0.1042	-0.10104	-0.0103444	-0.0297831
0.1044	-0.106513	-0.00976495	-0.0299562
0.1046	-0.101859	-0.0096133	-0.0290568
0.1048	-0.0970876	-0.00889298	-0.0293972
0.105	-0.0961988	-0.00882528	-0.029803
0.1052	-0.0960585	-0.00918815	-0.0287787
0.1054	-0.092901	-0.00912857	-0.0301236
0.1056	-0.0963626	-0.00799664	-0.029732
0.1058	-0.0996604	-0.00853824	-0.028895
0.106	-0.0971578	-0.00806163	-0.0292923
0.1062	-0.0978127	-0.00789645	-0.0291986
0.1064	-0.0940003	-0.00804268	-0.0292838
0.1066	-0.0980699	-0.00765815	-0.0299846
0.1068	-0.0965263	-0.00747671	-0.0289092
0.107	-0.0958246	-0.00829452	-0.0287815
0.1072	-0.0947955	-0.00789103	-0.0289802
0.1074	-0.0971578	-0.00763107	-0.0283588
0.1076	-0.0921525	-0.00777459	-0.0290029
0.1078	-0.0909831	-0.00797498	-0.0281148
0.108	-0.0928308	-0.0085274	-0.0282226
0.1082	-0.0912638	-0.00804809	-0.0288553
0.1084	-0.0954504	-0.00799664	-0.0292355
0.1086	-0.0929712	-0.00850845	-0.0286737
0.1088	-0.0955439	-0.00863843	-0.0285489
0.109	-0.0968537	-0.00888486	-0.0280467
0.1092	-0.0918017	-0.00897151	-0.0281744
0.1094	-0.091942	-0.00888486	-0.0285092
0.1096	-0.090679	-0.00859781	-0.0282311
0.1098	-0.0909129	-0.00858969	-0.028373
0.11	-0.0908895	-0.00798852	-0.0288979
0.1102	-0.090679	-0.00834868	-0.028478
0.1104	-0.0893459	-0.00791811	-0.028024
0.1106	-0.0887845	-0.00793165	-0.0276892
0.1108	-0.0869368	-0.00789645	-0.0275502
0.111	-0.0879893	-0.00816454	-0.0283957
0.1112	-0.0877554	-0.00842179	-0.0282992
0.1114	-0.0887144	-0.0079154	-0.0271416
0.1116	-0.0880361	-0.00857073	-0.0278935
0.1118	-0.0892055	-0.00887673	-0.0285063
0.112	-0.0900241	-0.00841367	-0.0285773
0.1122	-0.0887377	-0.00831618	-0.0287532
0.1124	-0.0936494	-0.0085599	-0.0283531
0.1126	-0.091638	-0.00861406	-0.0278452
0.1128	-0.0900709	-0.00827015	-0.0285971
0.113	-0.0894394	-0.0080156	-0.0275161
0.1132	-0.0919186	-0.00779896	-0.0280978
0.1134	-0.0924098	-0.0076419	-0.0278736
0.1136	-0.0891587	-0.0076094	-0.0277034
0.1138	-0.0881296	-0.00768793	-0.0276353
0.114	-0.0917549	-0.00775563	-0.0282879
0.1142	-0.0890652	-0.00773397	-0.0276012
0.1144	-0.0859778	-0.00787749	-0.0270139
0.1146	-0.0891354	-0.00819162	-0.0289376
0.1148	-0.0889716	-0.00824578	-0.0277346
0.115	-0.0885506	-0.0081537	-0.0270678
0.1152	-0.0890418	-0.00809684	-0.0284723
0.1154	-0.0905387	-0.00810225	-0.0285007
0.1156	-0.0900241	-0.00832431	-0.028146
0.1158	-0.0859311	-0.00740901	-0.028058
0.116	-0.0845277	-0.00699198	-0.0277828
0.1162	-0.0850423	-0.00761753	-0.0277942
0.1164	-0.0840366	-0.00769606	-0.0273686
0.1166	-0.0830074	-0.00766356	-0.0276863
0.1168	-0.0844108	-0.00814829	-0.0277232
0.117	-0.0856738	-0.00747671	-0.0276381
0.1172	-0.0846915	-0.007168	-0.0273657
0.1174	-0.0844342	-0.00801289	-0.0283134
0.1176	-0.083522	-0.00783146	-0.0278254
0.1178	-0.0853931	-0.00813746	-0.0274367
0.118	-0.0833817	-0.00846783	-0.0282396
0.1182	-0.0840132	-0.00796415	-0.0280268
0.1184	-0.0827502	-0.00779625	-0.027797
0.1186	-0.0834285	-0.00813475	-0.027709
0.1188	-0.0828905	-0.00759857	-0.0276495
0.119	-0.0854867	-0.00825661	-0.0272267
0.1192	-0.0863521	-0.00784229	-0.0282737
0.1194	-0.0845043	-0.00777459	-0.0278992
0.1196	-0.083639	-0.00809142	-0.0277516
0.1198	-0.0841535	-0.00787208	-0.0279559
0.12	-0.0803645	-0.00794519	-0.0279048
0.1202	-0.0830542	-0.00840555	-0.0272863
0.1204	-0.0845043	-0.00853553	-0.0280921
0.1206	-0.0829139	-0.00827827	-0.0274537
0.1208	-0.080879	-0.0085274	-0.0277176
0.121	-0.0822824	-0.00826202	-0.0274906
0.1212	-0.0814872	-0.00858156	-0.0275587
0.1214	-0.0799435	-0.00831618	-0.0284042
0.1216	-0.0829373	-0.00811308	-0.0273147
0.1218	-0.0824695	-0.00759586	-0.0277828
0.122	-0.0799903	-0.0080833	-0.0276693
0.1222	-0.0820953	-0.00826202	-0.0274282
0.1224	-0.0791249	-0.00756066	-0.027326
0.1226	-0.0821888	-0.00738464	-0.0271161
0.1228	-0.0824227	-0.00669682	-0.027587
0.123	-0.0818614	-0.00733319	-0.0272125
0.1232	-0.0813468	-0.00720321	-0.0272806
0.1234	-0.0791483	-0.00701094	-0.026733
0.1236	-0.0802709	-0.00688637	-0.0285489
0.1238	-0.0823526	-0.00689721	-0.0279247
0.124	-0.0803411	-0.00686742	-0.0271756
0.1242	-0.0797564	-0.00772584	-0.0271359
0.1244	-0.0808557	-0.00741172	-0.0283333
0.1246	-0.0782127	-0.00803185	-0.0272608
0.1248	-0.0796862	-0.00738464	-0.0270167
0.125	-0.0801072	-0.00766898	-0.0276977
0.1252	-0.0776748	-0.00774751	-0.0269401
0.1254	-0.0744237	-0.00737922	-0.0272749
0.1256	-0.079312	-0.00697032	-0.0269288
0.1258	-0.0819783	-0.00717883	-0.0267359
0.126	-0.0803879	-0.0073359	-0.027902
0.1262	-0.0781659	-0.00711384	-0.0271359
0.1264	-0.0787507	-0.00718425	-0.0277573
0.1266	-0.0797564	-0.00741172	-0.0273544
0.1268	-0.0785635	-0.00704073	-0.0268096
0.127	-0.0808089	-0.00737381	-0.0271416
0.1272	-0.0798733	-0.00773397	-0.0270054
0.1274	-0.0781659	-0.00723299	-0.0262251
0.1276	-0.0814638	-0.00767981	-0.027099
0.1278	-0.0768328	-0.00733048	-0.0275615
0.128	-0.0795459	-0.00707322	-0.0273686
0.1282	-0.0762714	-0.00726007	-0.0267415
0.1284	-0.0763182	-0.00762565	-0.0275927
0.1286	-0.0740729	-0.00756337	-0.0271955
0.1288	-0.0756633	-0.00804539	-0.0278878
0.129	-0.0755698	-0.00857886	-0.026977
0.1292	-0.0747277	-0.00889298	-0.0266365
0.1294	-0.0773239	-0.00830264	-0.0273232
0.1296	-0.0769029	-0.00796415	-0.0268238
0.1298	-0.0771134	-0.00806976	-0.0273487
0.13	-0.0764819	-0.00756607	-0.0277857
0.1302	-0.0747511	-0.00746046	-0.0274622
0.1304	-0.074564	-0.00654788	-0.0269089
0.1306	-0.0751721	-0.00724924	-0.0274821
0.1308	-0.0746342	-0.0074713	-0.0268153
0.131	-0.0796628	-0.00707052	-0.0277772
0.1312	-0.0791249	-0.00720862	-0.0275927
0.1314	-0.0773941	-0.00659933	-0.0273714
0.1316	-0.0754528	-0.00685388	-0.0277743
0.1318	-0.0780022	-0.00670494	-0.0278254
0.132	-0.0757101	-0.00712468	-0.0273203
0.1322	-0.0750552	-0.00709218	-0.0278992
0.1324	-0.0780958	-0.00713551	-0.0275473
0.1326	-0.0757101	-0.00647747	-0.0268295
0.1328	-0.0769965	-0.00690804	-0.0276466
0.133	-0.0738156	-0.00718967	-0.0261514
0.1332	-0.076248	-0.00738193	-0.0272352
0.1334	-0.0762247	-0.00744151	-0.0277289
0.1336	-0.0777917	-0.00699198	-0.0280637
0.1338	-0.0753593	-0.00652892	-0.0272324
0.134	-0.0789378	-0.00647205	-0.0273913
0.1342	-0.0780256	-0.00663453	-0.0271104
0.1344	-0.0760375	-0.00636644	-0.0269855
0.1346	-0.0771134	-0.00640165	-0.0278169
0.1348	-0.0775812	-0.00632582	-0.0272551
0.135	-0.0760609	-0.00599274	-0.0269231
0.1352	-0.0791249	-0.00656142	-0.0272664
0.1354	-0.077511	-0.00632041	-0.0278197
0.1356	-0.0803411	-0.00684575	-0.0274792
0.1358	-0.07426	-0.00634478	-0.0273402
0.136	-0.0771602	-0.00653163	-0.0269203
0.1362	-0.078891	-0.00651538	-0.0279048
0.1364	-0.0798265	-0.00706239	-0.0268891
0.1366	-0.075406	-0.00724112	-0.027448
0.1368	-0.0771602	-0.00734673	-0.0268749
0.137	-0.0776514	-0.00755253	-0.027587
0.1372	-0.0741664	-0.00674285	-0.0277346
0.1374	-0.0755931	-0.00710572	-0.0271416
0.1376	-0.0758504	-0.00720862	-0.0278055
0.1378	-0.07709	-0.00680243	-0.0271671
0.138	-0.0779086	-0.00655871	-0.0271161
0.1382	-0.0750084	-0.00655329	-0.0270792
0.1384	-0.0739325	-0.00643685	-0.0273147
0.1386	-0.0764351	-0.00674014	-0.0271217
0.1388	-0.0733244	-0.00718696	-0.0274821
0.139	-0.0759908	-0.00729257	-0.0270763
0.1392	-0.0764585	-0.00699198	-0.0272835
0.1394	-0.0742366	-0.00735214	-0.027221
0.1396	-0.0749616	-0.00691075	-0.0272437
0.1398	-0.0762714	-0.00698386	-0.0264606
0.14	-0.073418	-0.00715988	-0.0277743
0.1402	-0.0768328	-0.00748213	-0.0275331
0.1404	-0.0758504	-0.0079154	-0.0270934
0.1406	-0.0736519	-0.00792353	-0.0276211
0.1408	-0.0758504	-0.00752275	-0.0274452
0.141	-0.0748213	-0.00752545	-0.0265713
0.1412	-0.0724824	-0.00766085	-0.0275473
0.1414	-0.0731841	-0.00691887	-0.0271019
0.1416	-0.0756867	-0.00709218	-0.0267642
0.1418	-0.0732543	-0.00699469	-0.0270309
0.142	-0.0736986	-0.00721675	-0.0273601
0.1422	-0.0744237	-0.00764461	-0.0271558
0.1424	-0.0755698	-0.00805893	-0.0277147
0.1426	-0.0757101	-0.00747942	-0.0269487
0.1428	-0.076786	-0.0081862	-0.0271501
0.143	-0.0751488	-0.00772584	-0.027675
0.1432	-0.0738624	-0.00846783	-0.0270167
0.1434	-0.0731841	-0.00864114	-0.0268522
0.1436	-0.0730438	-0.00819432	-0.0268437
0.1438	-0.073839	-0.00806163	-0.0260663
0.144	-0.0698395	-0.00816995	-0.0271416
0.1442	-0.0732075	-0.00785583	-0.0266961
0.1444	-0.0694418	-0.00820786	-0.0267472
0.1446	-0.0704476	-0.0085274	-0.0266025
0.1448	-0.0691144	-0.00765273	-0.0266139
0.145	-0.0708686	-0.0085599	-0.0264124
0.1452	-0.0693249	-0.00822682	-0.027343
0.1454	-0.0705645	-0.00778813	-0.026855
0.1456	-0.0728566	-0.00728715	-0.026855
0.1458	-0.0727397	-0.00712738	-0.0277431
0.146	-0.0741196	-0.00760669	-0.0267898
0.1462	-0.0696991	-0.00794519	-0.027519
0.1464	-0.0709855	-0.00793165	-0.0280495
0.1466	-0.0722485	-0.00797498	-0.0270508
0.1468	-0.0729502	-0.00726278	-0.0273288
0.147	-0.0717106	-0.00758232	-0.0270111
0.1472	-0.0733712	-0.00729799	-0.0269742
0.1474	-0.0719912	-0.00753087	-0.0270054
0.1476	-0.071617	-0.00819432	-0.026384
0.1478	-0.0725994	-0.00779625	-0.0269316
0.148	-0.0697693	-0.00764731	-0.0269714
0.1482	-0.0721784	-0.00772584	-0.0266621
0.1484	-0.0700734	-0.00719508	-0.0273232
0.1486	-0.0726461	-0.00714363	-0.0268238
0.1488	-0.0709154	-0.00742526	-0.0270451
0.149	-0.0677345	-0.00748484	-0.0273799
0.1492	-0.0701903	-0.00770147	-0.027187
0.1494	-0.0703306	-0.00762836	-0.0272154
0.1496	-0.0721082	-0.00736839	-0.0266763
0.1498	-0.0700967	-0.00785583	-0.0265089
0.15	-0.0715702	-0.007845	-0.0268437
0.1502	-0.0694185	-0.00838117	-0.0272324
0.1504	-0.0706347	-0.0094102	-0.0267529
0.1506	-0.0719445	-0.00915295	-0.0272608
0.1508	-0.0708452	-0.00868447	-0.0271189
0.151	-0.0702605	-0.007845	-0.0264777
0.1512	-0.069629	-0.00803997	-0.0269572
0.1514	-0.0714767	-0.00728174	-0.0268494
0.1516	-0.0690442	-0.00789916	-0.0269118
0.1518	-0.0696056	-0.00771501	-0.0269458
0.152	-0.0721784	-0.00767981	-0.0271161
0.1522	-0.0709855	-0.00736568	-0.0267274
0.1524	-0.0721316	-0.00705156	-0.0274083
0.1526	-0.0725058	-0.00740089	-0.0271388
0.1528	-0.0710323	-0.00796956	-0.0274225
0.153	-0.0704242	-0.00780167	-0.0270877
0.1532	-0.0721784	-0.00797498	-0.0271842
0.1534	-0.0741898	-0.00858427	-0.0278424
0.1536	-0.0727163	-0.00831618	-0.0259187
0.1538	-0.074143	-0.0082539	-0.02717
0.154	-0.0736986	-0.00834868	-0.028041
0.1542	-0.0717807	-0.00816454	-0.0277289
0.1544	-0.0744471	-0.00784229	-0.0267813
0.1546	-0.0710323	-0.00821057	-0.0271586
0.1548	-0.0702371	-0.00780979	-0.0262819
0.155	-0.0728566	-0.0079154	-0.0271331
0.1552	-0.0721082	-0.00808601	-0.0264436
0.1554	-0.0733712	-0.00797769	-0.0275388
0.1556	-0.0746108	-0.00840284	-0.0268181
0.1558	-0.0677578	-0.00828369	-0.0268267
0.156	-0.069208	-0.00771501	-0.0267642
0.1562	-0.0707984	-0.00691075	-0.0266621
0.1564	-0.0717807	-0.00681055	-0.0267046
0.1566	-0.0703072	-0.0066589	-0.0264862
0.1568	-0.0690208	-0.00633936	-0.0268068
0.157	-0.0691378	-0.00711655	-0.0267075
0.1572	-0.0706581	-0.00681597	-0.026455
0.1574	-0.0705879	-0.007168	-0.0261741
0.1576	-0.0705411	-0.00745776	-0.0270593
0.1578	-0.0735349	-0.00690262	-0.0272069
0.158	-0.0696991	-0.00698928	-0.0263046
0.1582	-0.0691846	-0.00675368	-0.0267813
0.1584	-0.0719445	-0.00650726	-0.0272522
0.1586	-0.0710089	-0.00663453	-0.0263557
0.1588	-0.0706347	-0.00697303	-0.0271586
0.159	-0.0723421	-0.00705156	-0.0271217
0.1592	-0.0681321	-0.00723841	-0.0267954
0.1594	-0.0718275	-0.00748754	-0.0269884
0.1596	-0.0726695	-0.00792353	-0.0265401
0.1598	-0.070354	-0.00844075	-0.0268238
0.16	-0.0721082	-0.00801289	-0.0269515
0.1602	-0.0691612	-0.00739276	-0.0267302
0.1604	-0.0681087	-0.00739818	-0.0270536
0.1606	-0.0701201	-0.00801289	-0.0272125
0.1608	-0.0715936	-0.00817266	-0.0262734
0.161	-0.0698395	-0.00830264	-0.0276041
0.1612	-0.0687869	-0.00792082	-0.0260946
0.1614	-0.0712194	-0.00768523	-0.0270338
0.1616	-0.0696056	-0.00772314	-0.027763
0.1618	-0.0706581	-0.00788291	-0.0267699
0.162	-0.0713364	-0.00781792	-0.0261741
0.1622	-0.0702371	-0.00825119	-0.0265741
0.1624	-0.0707516	-0.00779084	-0.0273175
0.1626	-0.0712194	-0.00716529	-0.027065
0.1628	-0.0683192	-0.00657766	-0.0268153
0.163	-0.0709387	-0.00614439	-0.0258818
0.1632	-0.0709387	-0.00661287	-0.0266053
0.1634	-0.0685531	-0.0066562	-0.026699
0.1636	-0.0687869	-0.00591963	-0.0268465
0.1638	-0.0658166	-0.00630958	-0.0265429
0.164	-0.0705879	-0.00685929	-0.0273203
0.1642	-0.0694886	-0.00669952	-0.0264124
0.1644	-0.069933	-0.00674285	-0.0267727
0.1646	-0.0690208	-0.00629874	-0.0265571
0.1648	-0.0695588	-0.0068268	-0.0265344
0.165	-0.0677578	-0.0075417	-0.027292
0.1652	-0.0701201	-0.00752004	-0.0269004
0.1654	-0.0671029	-0.00711114	-0.0259698
0.1656	-0.0657932	-0.00723299	-0.0262422
0.1658	-0.0709855	-0.00715717	-0.0269827
0.166	-0.0671731	-0.0067266	-0.0267359
0.1662	-0.0692313	-0.0077096	-0.0269855
0.1664	-0.0710323	-0.00773668	-0.0265543
0.1666	-0.0669626	-0.0077773	-0.0271643
0.1668	-0.069512	-0.00775292	-0.0270877
0.167	-0.067828	-0.00821057	-0.0266905
0.1672	-0.0675941	-0.0087982	-0.026994
0.1674	-0.0674772	-0.00831347	-0.0270934
0.1676	-0.0671029	-0.0084922	-0.0272863
0.1678	-0.0671497	-0.0090338	-0.027048
0.168	-0.0697459	-0.00860594	-0.0264181
0.1682	-0.0665182	-0.00804539	-0.0267188
0.1684	-0.0679683	-0.00802372	-0.0268068
0.1686	-0.0684361	-0.00744692	-0.0271047
0.1688	-0.0675239	-0.00743338	-0.0263244
0.169	-0.0685998	-0.00778542	-0.0266252
0.1692	-0.0708452	-0.00793707	-0.0266536
0.1694	-0.0656996	-0.00670765	-0.0269685
0.1696	-0.0701903	-0.00729799	-0.027221
0.1698	-0.0676409	-0.00763919	-0.025774
0.17	-0.0671263	-0.00711655	-0.026245
0.1702	-0.0666586	-0.00694866	-0.0268096
0.1704	-0.0671497	-0.00715988	-0.0270167
0.1706	-0.0680619	-0.0072005	-0.0270593
0.1708	-0.0678748	-0.0075417	-0.026821
0.171	-0.0693249	-0.00715175	-0.0263131
0.1712	-0.0659803	-0.00737922	-0.026733
0.1714	-0.0703774	-0.00697032	-0.0271274
0.1716	-0.0664247	-0.00688908	-0.0271104
0.1718	-0.0709154	-0.00676451	-0.0270735
0.172	-0.0662609	-0.00672931	-0.0269401
0.1722	-0.0687636	-0.00639623	-0.0262791
0.1724	-0.0661674	-0.00572195	-0.0269373
0.1726	-0.0693717	-0.00587901	-0.0267841
0.1728	-0.0673602	-0.00703531	-0.0271189
0.173	-0.0683192	-0.00770147	-0.0268238
0.1732	-0.0685998	-0.00790728	-0.0263642
0.1734	-0.0676643	-0.0076771	-0.0273118
0.1736	-0.0688571	-0.00772855	-0.0267046
0.1738	-0.0688571	-0.00737381	-0.0263897
0.174	-0.0705177	-0.00674014	-0.0265599
0.1742	-0.0729736	-0.00596295	-0.0266536
0.1744	-0.07005	-0.00585464	-0.0261514
0.1746	-0.067407	-0.00583297	-0.0267756
0.1748	-0.0687636	-0.00570841	-0.027187
0.175	-0.0697225	-0.00544032	-0.0262195
0.1752	-0.0695588	-0.00536991	-0.0265486
0.1754	-0.0713364	-0.00530763	-0.0262195
0.1756	-0.0706113	-0.00565966	-0.0264294
0.1758	-0.0660738	-0.00609835	-0.0272976
0.176	-0.0698395	-0.00571382	-0.0263528
0.1762	-0.0677578	-0.00579506	-0.0276495
0.1764	-0.0687402	-0.00583839	-0.0265202
0.1766	-0.0677812	-0.00586547	-0.0262535
0.1768	-0.0676877	-0.00689721	-0.0267983
0.177	-0.0698161	-0.00704885	-0.0267756
0.1772	-0.0684127	-0.00690804	-0.0263471
0.1774	-0.0685297	-0.00704885	-0.0272324
0.1776	-0.0670328	-0.00673744	-0.0267359
0.1778	-0.0718743	-0.00658308	-0.0270082
0.178	-0.0689273	-0.00751462	-0.0267501
0.1782	-0.0709855	-0.00737652	-0.0269401
0.1784	-0.0704476	-0.00668057	-0.0265429
0.1786	-0.0673368	-0.00676451	-0.0265316
0.1788	-0.0699798	-0.00638269	-0.0260719
0.179	-0.0711025	-0.0070976	-0.0266649
0.1792	-0.06867	-0.00785312	-0.0265401
0.1794	-0.0685764	-0.00732236	-0.0259244
0.1796	-0.071734	-0.00698386	-0.025862
0.1798	-0.0696056	-0.00722216	-0.026611
0.18	-0.0699096	-0.00706239	-0.0270622
0.1802	-0.0687869	-0.00669952	-0.0253768
0.1804	-0.0682256	-0.00701365	-0.0265571
0.1806	-0.0715001	-0.0073359	-0.0265117
0.1808	-0.0668691	-0.00690804	-0.0261031
0.181	-0.066144	-0.00678618	-0.027099
0.1812	-0.0711492	-0.0067266	-0.0266621
0.1814	-0.0677812	-0.00646393	-0.0261854
0.1816	-0.0665884	-0.00669682	-0.0272409
0.1818	-0.0665416	-0.00617959	-0.0262138
0.182	-0.0649278	-0.00626083	-0.0266025
0.1822	-0.0666352	-0.00623917	-0.0271813
0.1824	-0.0673134	-0.00605773	-0.0266394
0.1826	-0.0655593	-0.00671577	-0.0266195
0.1828	-0.070775	-0.00699469	-0.0267075
0.183	-0.0696524	-0.0069297	-0.0262791
0.1832	-0.0707516	-0.00749567	-0.0268976
0.1834	-0.0703072	-0.0072005	-0.0270054
0.1836	-0.0688337	-0.007168	-0.0256974
0.1838	-0.0679917	-0.00742255	-0.027048
0.184	-0.0679683	-0.00768252	-0.0263443
0.1842	-0.0645769	-0.0073386	-0.0255016
0.1844	-0.0687869	-0.00727361	-0.0266621
0.1846	-0.0658399	-0.00736298	-0.0268238
0.1848	-0.0688103	-0.00727361	-0.0253853
0.185	-0.0662142	-0.00846241	-0.0263954
0.1852	-0.0640858	-0.00835409	-0.0261883
0.1854	-0.0649512	-0.00802643	-0.0253881
0.1856	-0.0660504	-0.00853824	-0.0259187
0.1858	-0.0682724	-0.00833243	-0.0264408
0.186	-0.0680151	-0.00848137	-0.0259953
0.1862	-0.0678748	-0.0077773	-0.0266479
0.1864	-0.0653254	-0.00786395	-0.0260918
0.1866	-0.0670562	-0.00860864	-0.0257939
0.1868	-0.0666586	-0.00887132	-0.0270394
0.187	-0.0670562	-0.00924502	-0.0264351
0.1872	-0.0662843	-0.0085951	-0.0266564
0.1874	-0.0672901	-0.00851928	-0.0264323
0.1876	-0.0666118	-0.00835139	-0.0258024
0.1878	-0.0635011	-0.00806434	-0.0268947
0.188	-0.0645302	-0.00785583	-0.0265004
0.1882	-0.066682	-0.00756066	-0.0264777
0.1884	-0.0657932	-0.00795602	-0.0265798
0.1886	-0.0662376	-0.00743068	-0.0263273
0.1888	-0.0678982	-0.0073711	-0.0260038
0.189	-0.0660504	-0.0075417	-0.0267472
0.1892	-0.0650681	-0.00782333	-0.0267727
0.1894	-0.0647641	-0.0082214	-0.026228
0.1896	-0.0663311	-0.00750108	-0.0264408
0.1898	-0.0667521	-0.00714092	-0.026106
0.19	-0.0677812	-0.00665078	-0.0264408
0.1902	-0.0642027	-0.00678618	-0.0261798
0.1904	-0.0679917	-0.00678076	-0.0266649
0.1906	-0.0646939	-0.00683763	-0.0265855
0.1908	-0.0691144	-0.00731423	-0.0263131
0.191	-0.0653955	-0.00782875	-0.0268692
0.1912	-0.0672901	-0.00803455	-0.0268011
0.1914	-0.0649979	-0.00739006	-0.0264209
0.1916	-0.0649044	-0.00748484	-0.0269345
0.1918	-0.0688571	-0.00827286	-0.026228
0.192	-0.0666586	-0.00763648	-0.0257967
0.1922	-0.0667521	-0.00749567	-0.0268749
0.1924	-0.0673368	-0.00720321	-0.0263386
0.1926	-0.0683426	-0.0078802	-0.0259159
0.1928	-0.067945	-0.00768523	-0.0272381
0.193	-0.0638753	-0.00776917	-0.0263415
0.1932	-0.0673134	-0.00731965	-0.0265231
0.1934	-0.0669626	-0.00740901	-0.0262592
0.1936	-0.0675006	-0.00727903	-0.0273828
0.1938	-0.0689273	-0.00749025	-0.0258648
0.194	-0.0673134	-0.00751192	-0.0259982
0.1942	-0.0674772	-0.00745505	-0.026994
0.1944	-0.0699798	-0.0078802	-0.025862
0.1946	-0.0663311	-0.00752275	-0.0265032
0.1948	-0.0691612	-0.00763919	-0.0265174
0.195	-0.0678514	-0.00707864	-0.0253683
0.1952	-0.0654657	-0.00658308	-0.0257116
0.1954	-0.0712662	-0.00630958	-0.0267103
0.1956	-0.0691378	-0.00671036	-0.0258875
0.1958	-0.0637116	-0.00699198	-0.0254052
0.196	-0.0667053	-0.00690262	-0.0263699
0.1962	-0.0684595	-0.00723299	-0.0262876
0.1964	-0.0651383	-0.00672119	-0.0263103
0.1966	-0.0680619	-0.00667786	-0.0271473
0.1968	-0.0676175	-0.00647205	-0.0256208
0.197	-0.0649979	-0.00619313	-0.0267245
0.1972	-0.0682958	-0.00636915	-0.0264067
0.1974	-0.0647407	-0.00694053	-0.0261939
0.1976	-0.0683659	-0.0066589	-0.0257655
0.1978	-0.0697927	-0.00651267	-0.0265146
0.198	-0.0652084	-0.00759045	-0.025862
0.1982	-0.069933	-0.00736839	-0.0272466
0.1984	-0.0686232	-0.00705427	-0.0263443
0.1986	-0.0669626	-0.00713009	-0.0265032
0.1988	-0.069208	-0.00609294	-0.0270565
0.199	-0.0666586	-0.00655329	-0.0265486
0.1992	-0.0671731	-0.00661558	-0.0258762
0.1994	-0.0689741	-0.00614439	-0.0267132
0.1996	-0.067828	-0.00640435	-0.026455
0.1998	-0.0653955	-0.0069649	-0.0249739
0.2	-0.0683192	-0.00691616	-0.0263784
0.2002	-0.0691846	-0.00698115	-0.0257683
0.2004	-0.0669626	-0.00694595	-0.0257541
0.2006	-0.0678046	-0.00644497	-0.0260833
0.2008	-0.0690442	-0.0065912	-0.0255385
0.201	-0.0647874	-0.00656412	-0.0266678
0.2012	-0.0671029	-0.00635561	-0.0264975
0.2014	-0.0671965	-0.00678618	-0.0258989
0.2016	-0.0681087	-0.00664807	-0.0259584
0.2018	-0.0655125	-0.00602253	-0.0266053
0.202	-0.0696056	-0.00659391	-0.0264181
0.2022	-0.0667989	-0.00641248	-0.0265231
0.2024	-0.0680385	-0.00593046	-0.0258903
0.2026	-0.0694185	-0.00541324	-0.0262819
0.2028	-0.0638519	-0.00581943	-0.0263244
0.203	-0.0682256	-0.00641789	-0.026106
0.2032	-0.0644132	-0.00647747	-0.0266365
0.2034	-0.0656762	-0.00615793	-0.0275502
0.2036	-0.0653955	-0.00656142	-0.0265514
0.2038	-0.0662609	-0.00632312	-0.0260776
0.204	-0.0650447	-0.00598733	-0.0261344
0.2042	-0.0658867	-0.00653705	-0.0257258
0.2044	-0.0668925	-0.00700552	-0.0263273
0.2046	-0.0665182	-0.00640706	-0.0271586
0.2048	-0.0699798	-0.00643956	-0.0265599
0.205	-0.0678748	-0.00669411	-0.0266734
0.2052	-0.0664247	-0.00650997	-0.0261031
0.2054	-0.0651149	-0.00653434	-0.0265458
0.2056	-0.061513	-0.00678076	-0.0265798
0.2058	-0.0689507	-0.00715717	-0.0262705
0.206	-0.0669626	-0.00669952	-0.025513
0.2062	-0.0682958	-0.006556	-0.026367
0.2064	-0.0670562	-0.00643414	-0.0267302
0.2066	-0.068249	-0.00637998	-0.0268238
0.2068	-0.0660037	-0.00653163	-0.0267557
0.207	-0.0660271	-0.00714905	-0.0254477
0.2072	-0.0676175	-0.0074713	-0.0261514
0.2074	-0.0668457	-0.00667786	-0.0264323
0.2076	-0.0681321	-0.00624458	-0.0263727
0.2078	-0.0678514	-0.00573549	-0.0271019
0.208	-0.065723	-0.0054701	-0.0266734
0.2082	-0.0655593	-0.00579777	-0.0268096
0.2084	-0.0656762	-0.00617418	-0.0264521
0.2086	-0.0646003	-0.00615793	-0.0260861
0.2088	-0.0660271	-0.00645851	-0.0266791
0.209	-0.0646003	-0.00580589	-0.0269685
0.2092	-0.0653254	-0.0057734	-0.0262876
0.2094	-0.0658633	-0.00600087	-0.0267699
0.2096	-0.0654657	-0.00489872	-0.026716
0.2098	-0.0669158	-0.00570299	-0.0263755
0.21	-0.0648576	-0.00597379	-0.0262195
0.2102	-0.0665182	-0.00667244	-0.0264578
0.2104	-0.0645536	-0.00679701	-0.0260634
0.2106	-0.0654891	-0.006556	-0.0263613
0.2108	-0.0646237	-0.00663453	-0.0262223
0.211	-0.067945	-0.00690262	-0.0258478
0.2112	-0.0672199	-0.00722758	-0.0267302
0.2114	-0.0664715	-0.00723299	-0.0262251
0.2116	-0.0644366	-0.00730069	-0.0265543
0.2118	-0.0684829	-0.00636644	-0.0260351
0.212	-0.0643898	-0.00612814	-0.0264975
0.2122	-0.0642261	-0.00627166	-0.0264323
0.2124	-0.064343	-0.00608481	-0.0260776
0.2126	-0.0664013	-0.00616334	-0.0267586
0.2128	-0.0661908	-0.00635832	-0.0266791
0.213	-0.0650681	-0.0064883	-0.0264181
0.2132	-0.0657932	-0.00630145	-0.0261741
0.2134	-0.0670562	-0.00664536	-0.0258591
0.2136	-0.065606	-0.0068268	-0.0263926
0.2138	-0.0676409	-0.00723299	-0.0262507
0.214	-0.0682256	-0.00723029	-0.0264351
0.2142	-0.0674772	-0.00745505	-0.02635
0.2144	-0.0653254	-0.00728986	-0.0263017
0.2146	-0.0663779	-0.00759045	-0.0263103
0.2148	-0.0683426	-0.00756878	-0.026367
0.215	-0.0668691	-0.00685388	-0.0265117
0.2152	-0.0686934	-0.00674014	-0.0265741
0.2154	-0.0637817	-0.0074713	-0.0262734
0.2156	-0.066144	-0.00752275	-0.0264323
0.2158	-0.0612791	-0.00762023	-0.0268295
0.216	-0.0645769	-0.00742797	-0.0265543
0.2162	-0.0672433	-0.00802372	-0.0266025
0.2164	-0.0686232	-0.00760669	-0.02574
0.2166	-0.0666352	-0.00762565	-0.0254108
0.2168	-0.0686232	-0.00824578	-0.0262195
0.217	-0.0669626	-0.00824578	-0.0259755
0.2172	-0.0650915	-0.00829994	-0.0259726
0.2174	-0.0664013	-0.0081185	-0.0265032
0.2176	-0.0662142	-0.00729799	-0.025791
0.2178	-0.0664013	-0.00712197	-0.0259159
0.218	-0.0663779	-0.00669682	-0.0262308
0.2182	-0.0625655	-0.00656412	-0.025913
0.2184	-0.0656996	-0.00710572	-0.0255385
0.2186	-0.0658399	-0.00768793	-0.0262932
0.2188	-0.0644366	-0.00764461	-0.0264862
0.219	-0.0700032	-0.0085274	-0.0261769
0.2192	-0.0638519	-0.00831077	-0.0256265
0.2194	-0.0648342	-0.00804809	-0.0255158
0.2196	-0.0666352	-0.00839471	-0.0261826
0.2198	-0.0686466	-0.00872509	-0.0263046
0.22	-0.0639688	-0.00816724	-0.0264067
0.2202	-0.0688805	-0.0078802	-0.0260237
0.2204	-0.0668457	-0.00824036	-0.0268039
0.2206	-0.0635011	-0.00773397	-0.0262989
0.2208	-0.0661908	-0.00774751	-0.0261287
0.221	-0.0642027	-0.00775022	-0.0260748
0.2212	-0.0635478	-0.00795331	-0.025757
0.2214	-0.0669392	-0.00767981	-0.0271274
0.2216	-0.0675239	-0.00761753	-0.0264436
0.2218	-0.0648342	-0.00789374	-0.02696
0.222	-0.0698161	-0.00802101	-0.0260804
0.2222	-0.065723	-0.00831618	-0.0261429
0.2224	-0.0674304	-0.00843804	-0.0266337
0.2226	-0.0667521	-0.00829181	-0.0266564
0.2228	-0.0642729	-0.00816724	-0.0268181
0.223	-0.0666118	-0.00808601	-0.026611
0.2232	-0.0663311	-0.00846783	-0.0259953
0.2234	-0.0662843	-0.00813204	-0.0254818
0.2236	-0.0671965	-0.00753899	-0.0269118
0.2238	-0.0660271	-0.00753629	-0.0261627
0.224	-0.0659101	-0.00728715	-0.0256378
0.2242	-0.0666118	-0.00685929	-0.0262649
0.2244	-0.0640624	-0.00622292	-0.0265032
0.2246	-0.0646939	-0.00594942	-0.0258535
0.2248	-0.0670094	-0.00616605	-0.0267898
0.225	-0.0656294	-0.00634207	-0.0265344
0.2252	-0.0634777	-0.00651267	-0.0259641
0.2254	-0.0636882	-0.00620126	-0.0265231
0.2256	-0.0635011	-0.00599816	-0.0262791
0.2258	-0.0720146	-0.00622834	-0.0255924
0.226	-0.0648576	-0.00652892	-0.0261826
0.2262	-0.0635712	-0.00641248	-0.0264493
0.2264	-0.0663077	-0.00644768	-0.0261003
0.2266	-0.0641325	-0.00607398	-0.0266337
0.2268	-0.0653722	-0.00593046	-0.0268607
0.227	-0.0649746	-0.00650726	-0.0267501
0.2272	-0.0667053	-0.00684846	-0.0260577
0.2274	-0.0653254	-0.00645039	-0.0261712
0.2276	-0.0681087	-0.00663453	-0.0264011
0.2278	-0.0670328	-0.00667515	-0.0257116
0.228	-0.067945	-0.00663182	-0.0262138
0.2282	-0.0647641	-0.00713009	-0.025757
0.2284	-0.0656762	-0.00694595	-0.0256435
0.2286	-0.0676643	-0.00719237	-0.0258648
0.2288	-0.0631034	-0.00698115	-0.0261769
0.229	-0.0649512	-0.00664807	-0.0264152
0.2292	-0.0630567	-0.00681597	-0.0268039
0.2294	-0.0652084	-0.00663724	-0.0271047
0.2296	-0.0667989	-0.00598462	-0.0266592
0.2298	-0.0639454	-0.00648018	-0.0269742
0.23	-0.0669158	-0.00637457	-0.0260492
0.2302	-0.0648342	-0.00657496	-0.0262847
0.2304	-0.0667521	-0.00648559	-0.0261457
0.2306	-0.0654189	-0.00700282	-0.025791
0.2308	-0.0671263	-0.00708135	-0.0261003
0.231	-0.0663311	-0.00666703	-0.0265401
0.2312	-0.0654423	-0.00696761	-0.0260237
0.2314	-0.0663077	-0.00686471	-0.0263926
0.2316	-0.0638987	-0.00724653	-0.0264493
0.2318	-0.064881	-0.00687013	-0.025496
0.232	-0.0636414	-0.00667515	-0.0273288
0.2322	-0.0649044	-0.00688637	-0.0266252
0.2324	-0.0667287	-0.00775022	-0.0259811
0.2326	-0.0648342	-0.00825661	-0.0264152
0.2328	-0.0661206	-0.00767169	-0.026106
0.233	-0.0637817	-0.00716259	-0.0252037
0.2332	-0.0634777	-0.00749025	-0.0258762
0.2334	-0.0627526	-0.00790186	-0.0255953
0.2336	-0.0668691	-0.00745776	-0.0258478
0.2338	-0.0638285	-0.00715988	-0.0250505
0.234	-0.0674772	-0.00785312	-0.02553
0.2342	-0.0667755	-0.00789374	-0.02574
0.2344	-0.0647641	-0.0079831	-0.0258563
0.2346	-0.0656528	-0.00802372	-0.0261514
0.2348	-0.0653955	-0.00850303	-0.0252775
0.235	-0.064343	-0.00847866	-0.0259698
0.2352	-0.0662142	-0.00795061	-0.0253825
0.2354	-0.0677345	-0.00762294	-0.0262166
0.2356	-0.0659335	-0.00775022	-0.0265855
0.2358	-0.0636882	-0.0074388	-0.0257088
0.236	-0.0654657	-0.00758774	-0.0266309
0.2362	-0.0655125	-0.00787208	-0.0267245
0.2364	-0.0641559	-0.0072682	-0.0260889
0.2366	-0.0674538	-0.00700552	-0.0265174
0.2368	-0.0627292	-0.00728445	-0.0261769
0.237	-0.0683192	-0.00721404	-0.0263188
0.2372	-0.0660271	-0.00682951	-0.0271047
0.2374	-0.0650915	-0.00731423	-0.0270224
0.2376	-0.065606	-0.00690262	-0.0260265
0.2378	-0.0652786	-0.00666703	-0.0267444
0.238	-0.0655125	-0.00727632	-0.0261741
0.2382	-0.0680619	-0.00695949	-0.026262
0.2384	-0.0669392	-0.00739276	-0.0263159
0.2386	-0.0644366	-0.0072357	-0.0261485
0.2388	-0.0680151	-0.00686742	-0.0265429
0.239	-0.0655359	-0.00689991	-0.0268891
0.2392	-0.0674304	-0.0064206	-0.0264152
0.2394	-0.0667521	-0.00610919	-0.0251753
0.2396	-0.0639922	-0.00614981	-0.0260237
0.2398	-0.0644132	-0.0066589	-0.0261996
0.24	-0.0642963	-0.00711114	-0.0259925
0.2402	-0.0650447	-0.00715446	-0.0257229
0.2404	-0.0666118	-0.00716529	-0.026611
0.2406	-0.0636882	-0.00734673	-0.0253569
0.2408	-0.0634777	-0.00760128	-0.0263585
0.241	-0.0659335	-0.00734944	-0.0263103
0.2412	-0.0649278	-0.00688096	-0.0254789
0.2414	-0.0645769	-0.00758774	-0.0260776
0.2416	-0.0640858	-0.00760128	-0.0260464
0.2418	-0.0667989	-0.0070651	-0.0259301
0.242	-0.0628462	-0.00664266	-0.026489
0.2422	-0.0661908	-0.00617147	-0.0265004
0.2424	-0.0661674	-0.00656683	-0.0258449
0.2426	-0.0626824	-0.0066562	-0.0262649
0.2428	-0.0675473	-0.00671848	-0.0258223
0.243	-0.0657464	-0.00662641	-0.0267018
0.2432	-0.0655125	-0.00712468	-0.0268777
0.2434	-0.0643898	-0.00725737	-0.0259301
0.2436	-0.0659101	-0.00677264	-0.0257315
0.2438	-0.0630099	-0.00664266	-0.0266706
0.244	-0.0642027	-0.00669682	-0.0257088
0.2442	-0.0621679	-0.00723029	-0.0265287
0.2444	-0.0668925	-0.00680513	-0.026211
0.2446	-0.0634309	-0.00600087	-0.0253683
0.2448	-0.0657464	-0.00632041	-0.0259357
0.245	-0.0645769	-0.00596837	-0.0257683
0.2452	-0.0629631	-0.0067591	-0.0258223
0.2454	-0.0621211	-0.00675639	-0.0262791
0.2456	-0.0631502	-0.00652892	-0.0259982
0.2458	-0.0661206	-0.00595483	-0.0257683
0.246	-0.0671029	-0.00583297	-0.0257286
0.2462	-0.0656528	-0.00570028	-0.0250363
0.2464	-0.0650681	-0.00596025	-0.0261315
0.2466	-0.0671263	-0.00626625	-0.0265968
0.2468	-0.0663077	-0.00646122	-0.0258676
0.247	-0.0655125	-0.0072005	-0.0263982
0.2472	-0.0648576	-0.00713821	-0.0259442
0.2474	-0.0664948	-0.00705698	-0.0262024
0.2476	-0.0629163	-0.00731153	-0.0268181
0.2478	-0.0679683	-0.00666432	-0.0254506
0.248	-0.0664481	-0.00668328	-0.0257144
0.2482	-0.0640858	-0.00666974	-0.0261485
0.2484	-0.0665416	-0.005638	-0.0266053
0.2486	-0.0654891	-0.00608211	-0.0256747
0.2488	-0.0654891	-0.00569757	-0.026384
0.249	-0.0664948	-0.00586005	-0.0258279
0.2492	-0.0637349	-0.00658579	-0.0259556
0.2494	-0.0675941	-0.00663995	-0.0264833
0.2496	-0.0649512	-0.0069622	-0.0257088
0.2498	-0.0671731	-0.0069622	-0.0264521
0.25	-0.0681087	-0.00623104	-0.0265429
0.2502	-0.0672199	-0.00560009	-0.0249597
0.2504	-0.0657932	-0.00617959	-0.0263131
0.2506	-0.0632906	-0.00641248	-0.0254648
0.2508	-0.0664715	-0.00652892	-0.0252434
0.251	-0.0646237	-0.00701094	-0.0262592
0.2512	-0.066682	-0.00729257	-0.0249427
0.2514	-0.0649512	-0.00705156	-0.0258166
0.2516	-0.0620509	-0.00771501	-0.0257797
0.2518	-0.0663311	-0.00739547	-0.0259357
0.252	-0.0652786	-0.00697032	-0.0263528
0.2522	-0.0633607	-0.00633395	-0.0261826
0.2524	-0.064343	-0.00637998	-0.0253796
0.2526	-0.063922	-0.00700011	-0.0260946
0.2528	-0.061092	-0.00681867	-0.0259499
0.253	-0.0649512	-0.00707052	-0.0249228
0.2532	-0.064343	-0.00718154	-0.0259017
0.2534	-0.0637817	-0.00735214	-0.0257031
0.2536	-0.063618	-0.00691887	-0.0260776
0.2538	-0.065302	-0.00679972	-0.0253995
0.254	-0.0661674	-0.00668057	-0.0265968
0.2542	-0.0653488	-0.00715175	-0.0261883
0.2544	-0.0632438	-0.00711655	-0.026228
0.2546	-0.0671029	-0.0068268	-0.0266451
0.2548	-0.0659335	-0.00676993	-0.0261287
0.255	-0.0640156	-0.00673202	-0.0263046
0.2552	-0.0668925	-0.00685659	-0.0259386
0.2554	-0.069512	-0.00758232	-0.0257541
0.2556	-0.0690208	-0.00774751	-0.0251129
0.2558	-0.0631736	-0.00782875	-0.025269
0.256	-0.0650915	-0.00710843	-0.0263528
0.2562	-0.065606	-0.0079479	-0.0261258
0.2564	-0.0654891	-0.00762023	-0.0254846
0.2566	-0.0644366	-0.0074713	-0.0258166
0.2568	-0.0666118	-0.00704344	-0.0257315
0.257	-0.0670328	-0.00727632	-0.0250931
0.2572	-0.0648342	-0.00753087	-0.0267274
0.2574	-0.0649044	-0.00762836	-0.0262904
0.2576	-0.0655359	-0.00788291	-0.0258421
0.2578	-0.0637116	-0.00831347	-0.0259017
0.258	-0.0670094	-0.00799935	-0.0254903
0.2582	-0.0679917	-0.00713009	-0.0259329
0.2584	-0.0651149	-0.00813204	-0.0260606
0.2586	-0.0684127	-0.00870071	-0.0259982
0.2588	-0.0652552	-0.00787749	-0.0263188
0.259	-0.0667989	-0.0070326	-0.0264266
0.2592	-0.0700032	-0.00813746	-0.0260719
0.2594	-0.0644132	-0.00866822	-0.0258223
0.2596	-0.0662142	-0.00907712	-0.0263188
0.2598	-0.0685063	-0.00880903	-0.0262251
0.26	-0.0644834	-0.009069	-0.0260833
0.2602	-0.0641092	-0.00916649	-0.0261826
0.2604	-0.0658633	-0.00958081	-0.0261202
0.2606	-0.0621913	-0.00895256	-0.0254364
0.2608	-0.0658166	-0.00890381	-0.0264919
0.261	-0.0688571	-0.00863572	-0.0265741
0.2612	-0.0642963	-0.00866551	-0.0263017
0.2614	-0.0639688	-0.00940208	-0.0269543
0.2616	-0.0660037	-0.00863572	-0.0260067
0.2618	-0.0651617	-0.00880091	-0.0274168
0.262	-0.0656294	-0.0085274	-0.026489
0.2622	-0.0642495	-0.00909337	-0.0260407
0.2624	-0.0648576	-0.00857344	-0.0261826
0.2626	-0.0666118	-0.00738464	-0.0268238
0.2628	-0.0656762	-0.0071328	-0.0260748
0.263	-0.0638753	-0.00715446	-0.026577
0.2632	-0.0664247	-0.00719779	-0.0261173
0.2634	-0.0627526	-0.00749567	-0.0262365
0.2636	-0.0665416	-0.00783958	-0.0272239
0.2638	-0.0652084	-0.00779625	-0.0273345
0.264	-0.0655827	-0.00752816	-0.026018
0.2642	-0.061396	-0.00682138	-0.0262819
0.2644	-0.0620977	-0.00682409	-0.02614
0.2646	-0.0639454	-0.00725466	-0.0262138
0.2648	-0.06446	-0.00733048	-0.026821
0.265	-0.0634777	-0.00813204	-0.0260776
0.2652	-0.060554	-0.00868176	-0.025913
0.2654	-0.0619808	-0.00832972	-0.0263471
0.2656	-0.0659569	-0.00814558	-0.025774
0.2658	-0.0673134	-0.00764461	-0.0264238
0.266	-0.0675239	-0.0073386	-0.0261514
0.2662	-0.0664013	-0.00766085	-0.0253598
0.2664	-0.0645068	-0.00762565	-0.0265117
0.2666	-0.0635712	-0.00684305	-0.0262535
0.2668	-0.0627058	-0.00746046	-0.0258875
0.267	-0.0639922	-0.0066914	-0.0265231
0.2672	-0.0666352	-0.00669682	-0.0251044
0.2674	-0.0631034	-0.00717342	-0.0259584
0.2676	-0.0669392	-0.00690804	-0.0261712
0.2678	-0.0633841	-0.00741984	-0.0253172
0.268	-0.0643664	-0.00723029	-0.0251867
0.2682	-0.0645068	-0.00635019	-0.0257627
0.2684	-0.0613025	-0.00641789	-0.0247895
0.2686	-0.0653254	-0.00674556	-0.0254335
0.2688	-0.0627994	-0.0070326	-0.0258818
0.269	-0.0628929	-0.00681597	-0.0256293
0.2692	-0.0658867	-0.00731423	-0.0266507
0.2694	-0.0621679	-0.00779354	-0.0264862
0.2696	-0.0636648	-0.00755253	-0.0255867
0.2698	-0.0616767	-0.00779625	-0.0260691
0.27	-0.063197	-0.0084245	-0.0258223
0.2702	-0.0619106	-0.00949415	-0.0267046
0.2704	-0.0651617	-0.0102091	-0.0260946
0.2706	-0.0620743	-0.0088984	-0.0257769
0.2708	-0.0635478	-0.00849762	-0.0256265
0.271	-0.0633607	-0.00839201	-0.0261258
0.2712	-0.0635946	-0.0082214	-0.0256038
0.2714	-0.06446	-0.00862218	-0.0261656
0.2716	-0.0612089	-0.0084245	-0.0259669
0.2718	-0.0649979	-0.00930459	-0.0257343
0.272	-0.0658166	-0.00945624	-0.0260464
0.2722	-0.0672667	-0.00911233	-0.0251924
0.2724	-0.0623082	-0.0089661	-0.0255726
0.2726	-0.0666118	-0.00851928	-0.0260606
0.2728	-0.0659335	-0.00810225	-0.0257173
0.273	-0.0587531	-0.0081185	-0.0253853
0.2732	-0.0663311	-0.00796144	-0.0260322
0.2734	-0.0649278	-0.00759586	-0.024937
0.2736	-0.0614428	-0.00734402	-0.0253484
0.2738	-0.0664247	-0.00709489	-0.0251413
0.274	-0.0642495	-0.00665349	-0.0247441
0.2742	-0.0635244	-0.00609835	-0.0261968
0.2744	-0.0672901	-0.00648018	-0.0255896
0.2746	-0.0657932	-0.00637998	-0.0264408
0.2748	-0.0628695	-0.00671036	-0.025862
0.275	-0.064881	-0.0067239	-0.0252179
0.2752	-0.0634075	-0.00643143	-0.0258506
0.2754	-0.0664715	-0.00639081	-0.0253087
0.2756	-0.0629397	-0.00620126	-0.0252491
0.2758	-0.061396	-0.0058411	-0.0257882
0.276	-0.0671731	-0.00584651	-0.0250817
0.2762	-0.0660504	-0.00671577	-0.0261457
0.2764	-0.0624018	-0.00720321	-0.025513
0.2766	-0.0683192	-0.0065885	-0.0249767
0.2768	-0.0644132	-0.00664807	-0.0265571
0.277	-0.0647173	-0.00606586	-0.0256605
0.2772	-0.0660972	-0.00606044	-0.0261883
0.2774	-0.0641793	-0.00650997	-0.0264578
0.2776	-0.0686934	-0.00646935	-0.0259301
0.2778	-0.0692781	-0.00700011	-0.025652
0.278	-0.0664715	-0.00705968	-0.0263131
0.2782	-0.0688337	-0.00666432	-0.0264238
0.2784	-0.0672667	-0.00686742	-0.0258166
0.2786	-0.0636648	-0.00708135	-0.0257059
0.2788	-0.0646705	-0.00691345	-0.0262847
0.279	-0.0667053	-0.00720591	-0.0258932
0.2792	-0.0635011	-0.00681326	-0.0260549
0.2794	-0.0677812	-0.00679159	-0.0254052
0.2796	-0.0683893	-0.00685117	-0.0257882
0.2798	-0.062776	-0.00656954	-0.0261372
0.28	-0.066682	-0.00640165	-0.0263358
0.2802	-0.0665884	-0.00662912	-0.0260407
0.2804	-0.0647173	-0.00633124	-0.026733
0.2806	-0.0662142	-0.007845	-0.0264748
0.2808	-0.0657932	-0.00822682	-0.0256151
0.281	-0.0650681	-0.00692429	-0.0270338
0.2812	-0.0656528	-0.00682951	-0.0261826
0.2814	-0.0642495	-0.00675097	-0.0262053
0.2816	-0.0649278	-0.00674556	-0.026506
0.2818	-0.0658867	-0.0067943	-0.0253399
0.282	-0.0614662	-0.00600899	-0.026123
0.2822	-0.0643197	-0.00599816	-0.0261854
0.2824	-0.0647641	-0.00623646	-0.0259613
0.2826	-0.06446	-0.00604419	-0.0268579
0.2828	-0.0671029	-0.00756878	-0.0267557
0.283	-0.0667287	-0.00802372	-0.0254108
0.2832	-0.0634075	-0.00712738	-0.0261627
0.2834	-0.0630567	-0.00736839	-0.025669
0.2836	-0.0642027	-0.00717613	-0.0255499
0.2838	-0.0629163	-0.00714363	-0.0257996
0.284	-0.0637349	-0.00695407	-0.0258166
0.2842	-0.062355	-0.00667515	-0.0251441
0.2844	-0.0655125	-0.00663453	-0.0261003
0.2846	-0.0667989	-0.00705427	-0.0256378
0.2848	-0.0638987	-0.00686742	-0.0254279
0.285	-0.0643898	-0.00745234	-0.0262535
0.2852	-0.0599927	-0.0085951	-0.0261457
0.2854	-0.0613025	-0.00806976	-0.0253513
0.2856	-0.0638051	-0.00771231	-0.0263982
0.2858	-0.0691144	-0.00752816	-0.0253371
0.286	-0.0621679	-0.00648289	-0.0258421
0.2862	-0.0637116	-0.00704073	-0.0259442
0.2864	-0.061934	-0.00678347	-0.0256974
0.2866	-0.0617001	-0.00642873	-0.0263528
0.2868	-0.064343	-0.00723841	-0.0263897
0.287	-0.0650447	-0.00705156	-0.0259159
0.2872	-0.0630099	-0.00711655	-0.0266819
0.2874	-0.0646471	-0.00724112	-0.025618
0.2876	-0.0634777	-0.00728174	-0.0256946
0.2878	-0.0656996	-0.00718967	-0.0251867
0.288	-0.063197	-0.00741984	-0.026018
0.2882	-0.0623316	-0.00740089	-0.0255726
0.2884	-0.0661206	-0.00707864	-0.0258052
0.2886	-0.061513	-0.00751462	-0.0246419
0.2888	-0.061934	-0.00736027	-0.0254789
0.289	-0.0649512	-0.00750379	-0.0252633
0.2892	-0.0641092	-0.00797769	-0.0253371
0.2894	-0.0638051	-0.00749296	-0.0255782
0.2896	-0.0614896	-0.007474	-0.0258279
0.2898	-0.0639454	-0.00738193	-0.0254392
0.29	-0.0656528	-0.00727632	-0.0264975
0.2902	-0.0636882	-0.00758774	-0.0260577
0.2904	-0.0650213	-0.00753087	-0.0252803
0.2906	-0.064881	-0.00721404	-0.0262024
0.2908	-0.0654891	-0.00728986	-0.0263585
0.291	-0.0630333	-0.00730611	-0.0260152
0.2912	-0.064881	-0.00792623	-0.0255243
0.2914	-0.0625421	-0.00715717	-0.0261656
0.2916	-0.0623784	-0.00727903	-0.0253087
0.2918	-0.0662843	-0.00673202	-0.0258506
0.292	-0.0654423	-0.00707593	-0.0265316
0.2922	-0.0640858	-0.00742255	-0.0253229
0.2924	-0.0657464	-0.00699198	-0.025408
0.2926	-0.0652084	-0.00688367	-0.0257116
0.2928	-0.0623082	-0.00651538	-0.0261798
0.293	-0.0647874	-0.00646122	-0.0254477
0.2932	-0.0645302	-0.00683492	-0.0251271
0.2934	-0.0642963	-0.00715175	-0.0260833
0.2936	-0.0643664	-0.00722487	-0.0260691
0.2938	-0.0643664	-0.00650997	-0.0254562
0.294	-0.0646471	-0.00706239	-0.0249654
0.2942	-0.0660504	-0.00749025	-0.0260464
0.2944	-0.0638987	-0.00760399	-0.0256038
0.2946	-0.0668691	-0.00763919	-0.0248576
0.2948	-0.0660271	-0.0076094	-0.0264152
0.295	-0.067407	-0.00740901	-0.0256889
0.2952	-0.0688805	-0.00665349	-0.0260152
0.2954	-0.0689741	-0.00672931	-0.0256123
0.2956	-0.0659569	-0.00771231	-0.0255045
0.2958	-0.0666118	-0.00840555	-0.0254733
0.296	-0.0665182	-0.00845158	-0.026228
0.2962	-0.0676409	-0.00897964	-0.0255896
0.2964	-0.0704242	-0.00851928	-0.0248774
0.2966	-0.0686466	-0.00781521	-0.0254761
0.2968	-0.0654657	-0.0078802	-0.0251697
0.297	-0.066565	-0.00783687	-0.0258393
0.2972	-0.0653254	-0.00767981	-0.0256009
0.2974	-0.0676877	-0.00748754	-0.0255641
0.2976	-0.0669626	-0.00767981	-0.0266876
0.2978	-0.0653722	-0.00701365	-0.0261996
0.298	-0.0685764	-0.00756066	-0.0250987
0.2982	-0.0668925	-0.00663453	-0.0256151
0.2984	-0.0644366	-0.00643414	-0.025791
0.2986	-0.0659569	-0.00710572	-0.0256293
0.2988	-0.0663311	-0.00671306	-0.0257059
0.299	-0.0626357	-0.00691075	-0.0262081
0.2992	-0.0642729	-0.00701365	-0.0252094
0.2994	-0.0633841	-0.0066589	-0.0253059
0.2996	-0.0631502	-0.00603065	-0.0251583
0.2998	-0.0657698	-0.00691345	-0.0252463
0.3	-0.0648342	-0.00715988	-0.0259783
0.3002	-0.0617001	-0.00737922	-0.0257116
0.3004	-0.0654891	-0.00715175	-0.0259216
0.3006	-0.0624953	-0.0073034	-0.0262507
0.3008	-0.0624719	-0.0070299	-0.0255158
0.301	-0.0644366	-0.0072682	-0.0247781
0.3012	-0.0651617	-0.0070299	-0.0252151
0.3014	-0.0663311	-0.00639894	-0.0252633
0.3016	-0.0643197	-0.00735485	-0.0253768
0.3018	-0.0652084	-0.00732777	-0.0264635
0.302	-0.0633841	-0.00766898	-0.0255641
0.3022	-0.0642027	-0.00828369	-0.0264096
0.3024	-0.0622147	-0.00795061	-0.0258137
0.3026	-0.0647407	-0.00820245	-0.0258705
0.3028	-0.0667287	-0.00708135	-0.0263528
0.303	-0.063618	-0.00730882	-0.0263131
0.3032	-0.0675707	-0.00772043	-0.0255158
0.3034	-0.0656762	-0.00767439	-0.0264323
0.3036	-0.0646237	-0.00778542	-0.0250789
0.3038	-0.0642027	-0.00773668	-0.0254903
0.304	-0.0624018	-0.00795602	-0.0263159
0.3042	-0.0652318	-0.00762294	-0.0253484
0.3044	-0.0636882	-0.00785312	-0.0255782
0.3046	-0.0637349	-0.0074388	-0.025269
0.3048	-0.0614896	-0.00736568	-0.0248292
0.305	-0.0635478	-0.00724924	-0.0251073
0.3052	-0.0601798	-0.00739276	-0.0263954
0.3054	-0.0627058	-0.00720591	-0.0258591
0.3056	-0.0653955	-0.00718967	-0.0250505
0.3058	-0.0680853	-0.00687013	-0.025669
0.306	-0.0632204	-0.0074388	-0.0252973
0.3062	-0.0634543	-0.0071003	-0.025042
0.3064	-0.0633373	-0.00680513	-0.0256804
0.3066	-0.0658166	-0.00656412	-0.0249966
0.3068	-0.0646003	-0.00606586	-0.0256009
0.307	-0.0646939	-0.0059792	-0.0263131
0.3072	-0.0655593	-0.00718967	-0.0254108
0.3074	-0.065606	-0.00676722	-0.0250675
0.3076	-0.0671731	-0.006556	-0.0259698
0.3078	-0.0664948	-0.00673473	-0.025669
0.308	-0.0632906	-0.00686742	-0.0250079
0.3082	-0.0654657	-0.00700011	-0.0256038
0.3084	-0.0642261	-0.00704344	-0.0254619
0.3086	-0.065723	-0.00649372	-0.0264493
0.3088	-0.0642261	-0.00596566	-0.0260549
0.309	-0.0646003	-0.00564612	-0.0258449
0.3092	-0.0621211	-0.00639081	-0.0252746
0.3094	-0.0649512	-0.00655058	-0.025862
0.3096	-0.0633139	-0.00608481	-0.0257286
0.3098	-0.0644834	-0.00625	-0.025496
0.31	-0.0655125	-0.00601711	-0.0264323
0.3102	-0.0628695	-0.00638811	-0.0253428
0.3104	-0.06446	-0.00618501	-0.0264096
0.3106	-0.065723	-0.00683221	-0.0258024
0.3108	-0.0643664	-0.00676993	-0.0249853
0.311	-0.0650681	-0.00663182	-0.0259584
0.3112	-0.0659335	-0.00679159	-0.0253513
0.3114	-0.0630567	-0.00607127	-0.0249342
0.3116	-0.0629397	-0.00678347	-0.026106
0.3118	-0.0642729	-0.00666432	-0.0253059
0.312	-0.0622147	-0.00634207	-0.0253115
0.3122	-0.0621445	-0.00610648	-0.0259896
0.3124	-0.0646237	-0.00698386	-0.0254194
0.3126	-0.06308	-0.00726549	-0.025164
0.3128	-0.062355	-0.00780438	-0.0259187
0.313	-0.0613259	-0.00679972	-0.0246448
0.3132	-0.0669158	-0.00668598	-0.0253683
0.3134	-0.0643197	-0.00704344	-0.0258591
0.3136	-0.0646237	-0.00657225	-0.0259925
0.3138	-0.0638753	-0.00697032	-0.0254108
0.314	-0.0662376	-0.0076094	-0.0256662
0.3142	-0.0656996	-0.00720862	-0.025791
0.3144	-0.0672667	-0.00717613	-0.0256463
0.3146	-0.0676175	-0.00773668	-0.0264833
0.3148	-0.0646705	-0.00715988	-0.0264124
0.315	-0.0647173	-0.00650726	-0.0255243
0.3152	-0.0681087	-0.00659391	-0.0257882
0.3154	-0.0674772	-0.00630958	-0.0260804
0.3156	-0.0656294	-0.00694866	-0.0261429
0.3158	-0.0635244	-0.00797498	-0.0260521
0.316	-0.0612791	-0.0076094	-0.0259755
0.3162	-0.0659803	-0.00690533	-0.0256038
0.3164	-0.0643197	-0.0070976	-0.0255981
0.3166	-0.0631736	-0.00688096	-0.0253342
0.3168	-0.0648342	-0.00694053	-0.0262223
0.317	-0.0645536	-0.00741172	-0.02574
0.3172	-0.063922	-0.0072005	-0.0260124
0.3174	-0.0655593	-0.00807517	-0.026472
0.3176	-0.0637817	-0.00789374	-0.0257627
0.3178	-0.0657464	-0.00752004	-0.0260124
0.318	-0.0666352	-0.00761753	-0.0259329
0.3182	-0.0657932	-0.00730069	-0.0263528
0.3184	-0.0639688	-0.00743338	-0.0257854
0.3186	-0.0658166	-0.00749025	-0.0263159
0.3188	-0.0660504	-0.00756337	-0.0260124
0.319	-0.0676175	-0.00745776	-0.0253938
0.3192	-0.0667521	-0.00692429	-0.0262223
0.3194	-0.0636882	-0.00744422	-0.0253342
0.3196	-0.067828	-0.00789645	-0.0254676
0.3198	-0.0662142	-0.00838659	-0.0261287
0.32	-0.0629397	-0.00807247	-0.0261996
0.3202	-0.0670328	-0.00725466	-0.0250306
0.3204	-0.0655359	-0.0071003	-0.0265316
0.3206	-0.064039	-0.00630958	-0.026018
0.3208	-0.0664481	-0.00645851	-0.0257371
0.321	-0.0644834	-0.00736298	-0.0262819
0.3212	-0.0618872	-0.00694866	-0.025652
0.3214	-0.066565	-0.00711114	-0.0259641
0.3216	-0.0624953	-0.00730611	-0.0256151
0.3218	-0.0659101	-0.00776646	-0.0256463
0.322	-0.0658633	-0.00785041	-0.0255782
0.3222	-0.0616299	-0.00796144	-0.0259017
0.3224	-0.062659	-0.00753629	-0.0257003
0.3226	-0.0643197	-0.00793165	-0.0266365
0.3228	-0.0645068	-0.00732236	-0.0261003
0.323	-0.0647641	-0.00717071	-0.0250108
0.3232	-0.0635946	-0.00772314	-0.0256492
0.3234	-0.0624018	-0.00767439	-0.0257769
0.3236	-0.0639688	-0.00746317	-0.0257144
0.3238	-0.0652552	-0.00714634	-0.0261769
0.324	-0.0607178	-0.00725195	-0.0259187
0.3242	-0.0622848	-0.00700011	-0.0256378
0.3244	-0.0612089	-0.00782062	-0.0254761
0.3246	-0.0614896	-0.00731965	-0.0259641
0.3248	-0.0628695	-0.00742526	-0.025164
0.325	-0.0611855	-0.00835139	-0.0260577
0.3252	-0.0611154	-0.0082187	-0.0250533
0.3254	-0.062659	-0.00756337	-0.0252066
0.3256	-0.0629865	-0.007474	-0.0261117
0.3258	-0.0681788	-0.00662912	-0.0259414
0.326	-0.0622614	-0.00693782	-0.02553
0.3262	-0.0655359	-0.00683763	-0.0260492
0.3264	-0.062776	-0.0072357	-0.0248973
0.3266	-0.061934	-0.0073386	-0.0261457
0.3268	-0.0644366	-0.00705156	-0.0257315
0.327	-0.0632672	-0.00727903	-0.0266848
0.3272	-0.0638519	-0.00667786	-0.0253768
0.3274	-0.0638051	-0.00665078	-0.0255073
0.3276	-0.0631268	-0.00679972	-0.0253853
0.3278	-0.062238	-0.0067266	-0.0253201
0.328	-0.0633373	-0.00689991	-0.0252917
0.3282	-0.0610218	-0.00722487	-0.0256747
0.3284	-0.0636882	-0.00710301	-0.0259045
0.3286	-0.0666352	-0.00710572	-0.0257627
0.3288	-0.0635946	-0.00758774	-0.0255215
0.329	-0.0625655	-0.0067591	-0.0257315
0.3292	-0.0642729	-0.00690533	-0.0246334
0.3294	-0.0620977	-0.00778	-0.0259272
0.3296	-0.0627994	-0.00841638	-0.0259556
0.3298	-0.0629397	-0.00852199	-0.0250391
0.33	-0.0632906	-0.00906629	-0.0263727
0.3302	-0.0620275	-0.00972433	-0.0257769
0.3304	-0.0644834	-0.00946707	-0.0252037
0.3306	-0.0643197	-0.00949144	-0.0262819
0.3308	-0.0630567	-0.00908795	-0.0258081
0.331	-0.0646471	-0.00853553	-0.0263557
0.3312	-0.0616767	-0.00904192	-0.0259811
0.3314	-0.0635478	-0.00888486	-0.0254704
0.3316	-0.0639454	-0.00863572	-0.025496
0.3318	-0.0630099	-0.0090365	-0.0256236
0.332	-0.0662376	-0.00940208	-0.025391
0.3322	-0.0680151	-0.00889298	-0.0254704
0.3324	-0.0650447	-0.00906088	-0.0254931
0.3326	-0.0652084	-0.00939396	-0.02513
0.3328	-0.0649278	-0.010033	-0.0259244
0.333	-0.0639454	-0.00958622	-0.0251214
0.3332	-0.0660504	-0.00938312	-0.0251214
0.3334	-0.0663779	-0.00907712	-0.0258194
0.3336	-0.0604839	-0.00829723	-0.0259528
0.3338	-0.0651617	-0.00899047	-0.0253059
0.334	-0.0640156	-0.00899047	-0.0264692
0.3342	-0.0644834	-0.00847325	-0.02614
0.3344	-0.0663077	-0.00848408	-0.0250874
0.3346	-0.0656996	-0.00837847	-0.0261826
0.3348	-0.0630099	-0.00829452	-0.026211
0.335	-0.0666118	-0.00801289	-0.0251441
0.3352	-0.0664948	-0.00770418	-0.0261088
0.3354	-0.0649512	-0.00793707	-0.0267529
0.3356	-0.065302	-0.00851116	-0.0253399
0.3358	-0.0612323	-0.00854907	-0.0263046
0.336	-0.0612557	-0.00883882	-0.0254335
0.3362	-0.0651383	-0.00921252	-0.0257371
0.3364	-0.0639454	-0.0088307	-0.0256747
0.3366	-0.0626123	-0.00762023	-0.0251271
0.3368	-0.0633139	-0.00766085	-0.0260124
0.337	-0.0645068	-0.00771772	-0.0264635
0.3372	-0.0642495	-0.00765815	-0.0258818
0.3374	-0.0635478	-0.00800747	-0.0254676
0.3376	-0.0655593	-0.00766085	-0.0263982
0.3378	-0.0623316	-0.00749025	-0.0261883
0.338	-0.0657464	-0.00716529	-0.0259102
0.3382	-0.06446	-0.00724653	-0.0258223
0.3384	-0.0649278	-0.0082214	-0.0252349
0.3386	-0.0638285	-0.00835951	-0.0261003
0.3388	-0.0632438	-0.00777459	-0.026001
0.339	-0.0649979	-0.00715446	-0.0256634
0.3392	-0.0659569	-0.0072682	-0.0255385
0.3394	-0.0623316	-0.00731965	-0.0249654
0.3396	-0.0646471	-0.00695949	-0.0255953
0.3398	-0.0673602	-0.00727091	-0.0261031
0.34	-0.0646705	-0.00721133	-0.025984
0.3402	-0.0663545	-0.00728445	-0.0257229
0.3404	-0.0649278	-0.00741984	-0.025652
0.3406	-0.0607412	-0.00771772	-0.0258676
0.3408	-0.0675473	-0.00777459	-0.0257627
0.341	-0.0652552	-0.00810496	-0.0263131
0.3412	-0.0616767	-0.00807517	-0.0259669
0.3414	-0.0657464	-0.00743609	-0.026001
0.3416	-0.0651617	-0.00837847	-0.0270508
0.3418	-0.0639688	-0.00840013	-0.0257343
0.342	-0.0647641	-0.0084922	-0.0258194
0.3422	-0.0635478	-0.00789103	-0.0260975
0.3424	-0.0630333	-0.00767981	-0.0263784
0.3426	-0.0659803	-0.00771231	-0.0261003
0.3428	-0.0645068	-0.00728715	-0.0263074
0.343	-0.0653955	-0.00771501	-0.025198
0.3432	-0.0639922	-0.00790728	-0.0265146
0.3434	-0.0649044	-0.00782875	-0.0260719
0.3436	-0.0622848	-0.00766627	-0.0254307
0.3438	-0.0640858	-0.00795602	-0.0255953
0.344	-0.0622614	-0.00766085	-0.0259414
0.3442	-0.062238	-0.00860323	-0.025181
0.3444	-0.0634543	-0.00807517	-0.02635
0.3446	-0.0647874	-0.00790186	-0.0257854
0.3448	-0.0637817	-0.00787749	-0.0255272
0.345	-0.0627994	-0.00749567	-0.0256605
0.3452	-0.0597588	-0.00745234	-0.0260237
0.3454	-0.0630567	-0.00692429	-0.025879
0.3456	-0.0621913	-0.00667515	-0.0264238
0.3458	-0.0646705	-0.00642602	-0.025198
0.346	-0.0649512	-0.00651538	-0.0262989
0.3462	-0.0629631	-0.00689991	-0.0262734
0.3464	-0.0627058	-0.00719779	-0.0262365
0.3466	-0.0624719	-0.00703802	-0.0257598
0.3468	-0.0641092	-0.00666703	-0.0259811
0.347	-0.0643664	-0.00668598	-0.0257059
0.3472	-0.0642261	-0.00673473	-0.025669
0.3474	-0.0634543	-0.00614168	-0.0266195
0.3476	-0.0651617	-0.0062825	-0.0259726
0.3478	-0.0635011	-0.00658037	-0.0267586
0.348	-0.0638051	-0.00618501	-0.0260889
0.3482	-0.0616299	-0.0065208	-0.0260634
0.3484	-0.0632204	-0.0063854	-0.0259868
0.3486	-0.0638285	-0.00598191	-0.025913
0.3488	-0.0617469	-0.00661016	-0.0250931
0.349	-0.0626357	-0.006862	-0.0261258
0.3492	-0.06308	-0.00660474	-0.0260691
0.3494	-0.0612323	-0.00638269	-0.025425
0.3496	-0.0632672	-0.00611731	-0.026699
0.3498	-0.0617469	-0.00700823	-0.0254676
0.35	-0.0636882	-0.00698657	-0.0256719
0.3502	-0.0615598	-0.00674556	-0.0259698
0.3504	-0.0625889	-0.00710301	-0.0255981
0.3506	-0.0634075	-0.0070326	-0.0261571
0.3508	-0.0659101	-0.00734131	-0.0256577
0.351	-0.0661674	-0.00689179	-0.0260152
0.3512	-0.0654189	-0.00658579	-0.0264606
0.3514	-0.0656996	-0.00609835	-0.0251498
0.3516	-0.0637116	-0.00663453	-0.0251214
0.3518	-0.0645068	-0.00680784	-0.0262393
0.352	-0.0644366	-0.00644227	-0.0257939
0.3522	-0.0647173	-0.00639081	-0.0258308
0.3524	-0.0626824	-0.00623646	-0.0262819
0.3526	-0.0660037	-0.00681867	-0.0255584
0.3528	-0.0635478	-0.0070299	-0.0252519
0.353	-0.0617703	-0.00698657	-0.0255215
0.3532	-0.0639922	-0.00699469	-0.0258648
0.3534	-0.0647173	-0.00703802	-0.026506
0.3536	-0.0625889	-0.006862	-0.0254676
0.3538	-0.064039	-0.00669952	-0.0256151
0.354	-0.0637583	-0.00742526	-0.0260124
0.3542	-0.0638519	-0.0066589	-0.026506
0.3544	-0.0637349	-0.00616064	-0.0256747
0.3546	-0.0636414	-0.00671036	-0.0257996
0.3548	-0.0639922	-0.00685388	-0.0260918
0.355	-0.0645302	-0.0067266	-0.0263159
0.3552	-0.0649278	-0.00655058	-0.0257173
0.3554	-0.0663077	-0.00652351	-0.0267954
0.3556	-0.0632672	-0.00677535	-0.0257513
0.3558	-0.0592209	-0.00710301	-0.0262053
0.356	-0.062659	-0.00714634	-0.0261372
0.3562	-0.0653254	-0.00669411	-0.025391
0.3564	-0.0618638	-0.00631228	-0.0259925
0.3566	-0.0618638	-0.00649372	-0.0257059
0.3568	-0.0645536	-0.00683221	-0.0267813
0.357	-0.0638051	-0.00613897	-0.0268011
0.3572	-0.0620275	-0.00658037	-0.0260975
0.3574	-0.0638051	-0.00725466	-0.0257031
0.3576	-0.0619574	-0.0073034	-0.0261996
0.3578	-0.0631736	-0.00731965	-0.0257882
0.358	-0.0656996	-0.00731965	-0.0258875
0.3582	-0.0649512	-0.00670494	-0.0258989
0.3584	-0.0646939	-0.00691075	-0.0255697
0.3586	-0.065185	-0.00689991	-0.0257116
0.3588	-0.063197	-0.00632312	-0.027065
0.359	-0.0624018	-0.00709218	-0.0264777
0.3592	-0.0660504	-0.00651267	-0.026262
0.3594	-0.0618872	-0.00613085	-0.0257598
0.3596	-0.064343	-0.00654517	-0.0254279
0.3598	-0.063922	-0.00721404	-0.0264521
0.36	-0.0623316	-0.00642602	-0.0258052
0.3602	-0.0649979	-0.00694595	-0.0266053
0.3604	-0.0679917	-0.00724653	-0.0260691
0.3606	-0.0640156	-0.00732236	-0.0264578
0.3608	-0.065302	-0.00708947	-0.0257627
0.361	-0.0676877	-0.00678076	-0.0251555
0.3612	-0.063922	-0.00677264	-0.0256548
0.3614	-0.0650681	-0.00707864	-0.025669
0.3616	-0.0641092	-0.00636915	-0.0258818
0.3618	-0.0630333	-0.00654788	-0.0264323
0.362	-0.0672199	-0.00772855	-0.0248774
0.3622	-0.0657932	-0.00771231	-0.0259414
0.3624	-0.0652552	-0.00824578	-0.0265202
0.3626	-0.06446	-0.00813746	-0.0259272
0.3628	-0.0649044	-0.00768523	-0.0263755
0.363	-0.0678982	-0.00795061	-0.0257315
0.3632	-0.0642027	-0.00748213	-0.0252548
0.3634	-0.0659335	-0.00699469	-0.0258024
0.3636	-0.0635946	-0.00721675	-0.0259357
0.3638	-0.0663077	-0.00710301	-0.0249767
0.364	-0.0622848	-0.00747671	-0.0260549
0.3642	-0.0637583	-0.00722216	-0.0260748
0.3644	-0.0634309	-0.0069297	-0.0261684
0.3646	-0.0632672	-0.00643143	-0.0260861
0.3648	-0.0620509	-0.0057761	-0.0262195
0.365	-0.0635946	-0.00570841	-0.0257485
0.3652	-0.0603903	-0.00703531	-0.0266876
0.3654	-0.0614896	-0.00704885	-0.0254023
0.3656	-0.0636414	-0.0066589	-0.0254988
0.3658	-0.0640858	-0.00695136	-0.0263131
0.366	-0.0637583	-0.0071003	-0.0254619
0.3662	-0.0614194	-0.00663995	-0.0264011
0.3664	-0.0617235	-0.00671036	-0.0265174
0.3666	-0.0623316	-0.00644227	-0.0258989
0.3668	-0.0598758	-0.00640165	-0.0259045
0.367	-0.0636648	-0.0064206	-0.0260833
0.3672	-0.0624953	-0.00629874	-0.0254108
0.3674	-0.0628695	-0.00690533	-0.0251753
0.3676	-0.062776	-0.00694866	-0.0259187
0.3678	-0.0619808	-0.00676722	-0.0261599
0.368	-0.0606242	-0.00709218	-0.0263046
0.3682	-0.0622614	-0.00700823	-0.0264067
0.3684	-0.0612791	-0.00610106	-0.0250363
0.3686	-0.0624953	-0.00711926	-0.0258081
0.3688	-0.0647874	-0.00727632	-0.0252661
0.369	-0.0633373	-0.00753629	-0.0248973
0.3692	-0.06446	-0.00838117	-0.0263074
0.3694	-0.0630099	-0.00780438	-0.0256265
0.3696	-0.0657698	-0.00756337	-0.0259414
0.3698	-0.0645536	-0.00807788	-0.0259584
0.37	-0.0642495	-0.00810767	-0.0252434
0.3702	-0.0603903	-0.00806976	-0.0262024
0.3704	-0.0645068	-0.00859781	-0.026123
0.3706	-0.0607412	-0.00752004	-0.0250533
0.3708	-0.0651383	-0.00714634	-0.0259357
0.371	-0.0617703	-0.00742797	-0.025425
0.3712	-0.0666586	-0.00669952	-0.0253881
0.3714	-0.063197	-0.00669411	-0.0258847
0.3716	-0.0632906	-0.00703531	-0.0254165
0.3718	-0.0625655	-0.0069649	-0.0245057
0.372	-0.0635946	-0.00730611	-0.0262564
0.3722	-0.0601564	-0.0066237	-0.0260606
0.3724	-0.0632906	-0.00669952	-0.0260492
0.3726	-0.0640156	-0.00741443	-0.0264266
0.3728	-0.0631502	-0.00701094	-0.0254194
0.373	-0.0617703	-0.0072005	-0.0253087
0.3732	-0.0629631	-0.00723841	-0.0251952
0.3734	-0.0652318	-0.00702177	-0.0258932
0.3736	-0.0624719	-0.00691075	-0.0259641
0.3738	-0.0636648	-0.00706781	-0.0250874
0.374	-0.0635011	-0.00724924	-0.0256208
0.3742	-0.0631268	-0.00766898	-0.0259584
0.3744	-0.0639922	-0.00762565	-0.0260833
0.3746	-0.0661908	-0.00708406	-0.0258364
0.3748	-0.0625187	-0.0074036	-0.0257059
0.375	-0.065723	-0.00716259	-0.0262904
0.3752	-0.0640624	-0.00655329	-0.0259357
0.3754	-0.0662376	-0.00649913	-0.0262762
0.3756	-0.0656528	-0.00673202	-0.0255612
0.3758	-0.0638285	-0.00727091	-0.0253002
0.376	-0.0634075	-0.00712468	-0.0264266
0.3762	-0.063197	-0.00687013	-0.0260975
0.3764	-0.0659803	-0.00640706	-0.0254023
0.3766	-0.0640858	-0.00648289	-0.0258081
0.3768	-0.069512	-0.00763107	-0.0248746
0.377	-0.0643664	-0.00719779	-0.0251867
0.3772	-0.0635011	-0.00738464	-0.0260407
0.3774	-0.0647173	-0.0070326	-0.0254534
0.3776	-0.063922	-0.00734944	-0.0250221
0.3778	-0.0634543	-0.00762565	-0.0258251
0.378	-0.0657932	-0.00768252	-0.0258336
0.3782	-0.0645536	-0.00734944	-0.0262251
0.3784	-0.0676175	-0.0075417	-0.0261514
0.3786	-0.0656996	-0.00746317	-0.0256861
0.3788	-0.0636414	-0.00749296	-0.026506
0.379	-0.0698629	-0.00736027	-0.0271643
0.3792	-0.0626824	-0.00656683	-0.0265287
0.3794	-0.0641559	-0.00642331	-0.0256861
0.3796	-0.0657464	-0.00659662	-0.025618
0.3798	-0.0618638	-0.00617147	-0.0259811
0.38	-0.0616533	-0.00659662	-0.026367
0.3802	-0.0638051	-0.0073711	-0.0257996
0.3804	-0.0643898	-0.0069622	-0.0254137
0.3806	-0.0586127	-0.00649372	-0.0263046
0.3808	-0.0631502	-0.00611189	-0.0265146
0.381	-0.0641325	-0.0059088	-0.026245
0.3812	-0.0651617	-0.00635832	-0.0263244
0.3814	-0.0648576	-0.00598462	-0.025862
0.3816	-0.0653254	-0.00622834	-0.0252009
0.3818	-0.0631736	-0.00632853	-0.0258535
0.382	-0.0640156	-0.00581131	-0.0266365
0.3822	-0.0636882	-0.00530221	-0.0256804
0.3824	-0.0634309	-0.00567862	-0.025896
0.3826	-0.0646705	-0.00547552	-0.0257201
0.3828	-0.0636882	-0.00571924	-0.0262535
0.383	-0.0663311	-0.00613085	-0.0259272
0.3832	-0.0666586	-0.00595212	-0.0264436
0.3834	-0.0620743	-0.00669952	-0.0247441
0.3836	-0.0640156	-0.00643143	-0.0255953
0.3838	-0.0641325	-0.00680513	-0.0265599
0.384	-0.0634777	-0.00698657	-0.0258052
0.3842	-0.0651149	-0.00693512	-0.0260549
0.3844	-0.0618872	-0.00695136	-0.0262138
0.3846	-0.0627058	-0.0070976	-0.0260748
0.3848	-0.0635011	-0.00690804	-0.0262393
0.385	-0.0614194	-0.00656142	-0.0261996
0.3852	-0.0606944	-0.00661287	-0.0255782
0.3854	-0.062238	-0.00596566	-0.0261542
0.3856	-0.0627292	-0.00577881	-0.0258875
0.3858	-0.0667989	-0.00588713	-0.0256889
0.386	-0.06446	-0.00620938	-0.0254562
0.3862	-0.0606476	-0.00654517	-0.02513
0.3864	-0.0621913	-0.00653705	-0.0256236
0.3866	-0.0645302	-0.00574903	-0.0268352
0.3868	-0.0614194	-0.0049935	-0.0259074
0.387	-0.0613727	-0.00596837	-0.0258308
0.3872	-0.0606476	-0.00633666	-0.0256776
0.3874	-0.0636414	-0.00571111	-0.0255101
0.3876	-0.0621913	-0.0058086	-0.0255612
0.3878	-0.0624485	-0.00625271	-0.0257967
0.388	-0.0650915	-0.00619855	-0.0253853
0.3882	-0.0648576	-0.00675368	-0.0268267
0.3884	-0.0591507	-0.00694324	-0.0249427
0.3886	-0.0625187	-0.00637998	-0.0252491
0.3888	-0.0655359	-0.0066562	-0.0260889
0.389	-0.0646705	-0.00674014	-0.0256293
0.3892	-0.0638753	-0.00666703	-0.0254733
0.3894	-0.0613493	-0.00651809	-0.0258081
0.3896	-0.0639922	-0.00664536	-0.0261372
0.3898	-0.0660271	-0.00641789	-0.0257683
0.39	-0.0653955	-0.00686742	-0.0254619
0.3902	-0.0610686	-0.00647476	-0.0248292
0.3904	-0.0653254	-0.00569487	-0.0260124
0.3906	-0.0621445	-0.00568133	-0.0253456
0.3908	-0.0654657	-0.00566779	-0.0250817
0.391	-0.0625889	-0.00574632	-0.0258279
0.3912	-0.0659569	-0.00599545	-0.025374
0.3914	-0.0625421	-0.00623917	-0.0254562
0.3916	-0.0640156	-0.00616605	-0.0260606
0.3918	-0.0704008	-0.0059088	-0.0254222
0.392	-0.0652318	-0.00619313	-0.0264323
0.3922	-0.0633373	-0.00578964	-0.0252661
0.3924	-0.0650213	-0.00619042	-0.0261031
0.3926	-0.0611388	-0.00622292	-0.0252463
0.3928	-0.0649512	-0.0060469	-0.0259868
0.393	-0.0623316	-0.00615251	-0.0253683
0.3932	-0.0660972	-0.00591421	-0.025391
0.3934	-0.0660972	-0.00585734	-0.0253569
0.3936	-0.0629397	-0.00589796	-0.0262308
0.3938	-0.0660972	-0.00606857	-0.0255612
0.394	-0.0633373	-0.00570028	-0.0260521
0.3942	-0.0637583	-0.00506932	-0.0261571
0.3944	-0.0674772	-0.00505037	-0.0258762
0.3946	-0.0633373	-0.00571653	-0.0256577
0.3948	-0.0647173	-0.00578964	-0.0252633
0.395	-0.0650915	-0.00526971	-0.0248519
0.3952	-0.067828	-0.00457106	-0.0255158
0.3954	-0.0643197	-0.00469021	-0.0256066
0.3956	-0.0618872	-0.0050287	-0.0256719
[truncated: 35,521 more rows]

## Sheet: Fig.S1K
	MCF-7 + BKCa-DEC - RFP
[truncated: 37,501 more rows]

## Sheet: Fig.S1L
MCF-7
[truncated: 19 more rows]
