# Supplementary material for: mitoBKCa is functionally expressed in murine and human breast cancer cells and potentially contributes to metabolic reprogramming
Source: eLife. 2024 May 29;12:RP92511. doi: 10.7554/eLife.92511 (PMC11136494; doi:10.7554/eLife.92511)
Supplement: Figure 1—source data 1. [file elife-92511-fig1-data1.xlsx]

## Sheet: Fig.1A
	MMTV-PyMT WT ctrl
Voltage (mV)	Cell1	Cell2	Cell3	Cell4	Cell5	Cell6	Cell7	Cell8	Cell9	Cell10	Cell11	Cell12	Cell13	Cell14	Cell15
-100	0.0220762	0.0227599	0.0211268	-0.0272431	0.0059824	0.0148613	-0.047333	0.0124753	-0.024833	0.0197949	0.0138288	-0.00500455	-0.0121837	0.0253196	-0.00710219
-80	0.00924223	0.0097806	0.0108191	-0.0096248	0.00868035	0.00763312	-0.0138876	0.00463366	-0.00369763	0.00859621	0.00454374	-0.00122839	-0.00241799	0.00630906	-0.00202277
-60	0.0155059	0.00695099	0.00981165	0.0179445	0.0582991	0.0171492	0.024988	0.00189109	0.027626	0.00977918	0.00183443	0.00292539	0.00671978	0.00215397	0.00575367
-40	0.013053	0.0234775	0.0241787	0.0517129	0.180059	0.0481879	0.0670351	0.00725743	0.0722526	0.0266561	0.00354657	0.00864422	0.018463	0.0233741	0.0148637
-20	0.0171266	0.0397786	0.0420937	0.0823817	0.304399	0.0797732	0.109563	0.0154455	0.119611	0.0402997	0.00383819	0.0159691	0.0302718	0.0472485	0.025472
0	0.02212	0.0576174	0.0604468	0.115008	0.426979	0.106297	0.150889	0.0223762	0.159684	0.0521293	0.00745061	0.0248408	0.0427366	0.0742079	0.0356608
20	0.043145	0.101087	0.120018	0.141109	0.534311	0.136465	0.198222	0.0629703	0.202186	0.0742114	0.0368768	0.0370792	0.0575445	0.133685	0.0465987
40	0.110819	0.148657	0.201489	0.169657	0.656891	0.179186	0.239068	0.127723	0.23133	0.106467	0.0720602	0.0518653	0.0770384	0.242079	0.0608331
60	0.159877	0.217347	0.301358	0.203915	0.768328	0.244989	0.297934	0.226733	0.279296	0.158517	0.111007	0.066424	0.0955951	0.372429	0.0695235
80	0.341656	0.299364	0.423127	0.254486	0.891496	0.323952	0.362806	0.338614	0.318761	0.209779	0.16651	0.0832575	0.112465	0.505837	0.0788133
100	0.670171	0.393685	0.543145	0.294454	1.02053	0.427212	0.439692	0.480198	0.37037	0.277603	0.216369	0.102821	0.135895	0.619789	0.0999401
120	0.989926	0.484929	0.692072	0.333605	1.15543	0.704596	0.468525	0.59505	0.416515	0.343849	0.292568	0.126479	0.163074	0.758755	0.143093
140	1.20456	0.582325	0.836618	0.376835	1.29619	0.860498	0.540605	0.70198	0.480874	0.410883	0.361242	0.151501	0.208997	0.908838	0.193287
160	1.55935	0.685872	0.989926	0.442088	1.48974	0.979955	0.691975	0.843564	0.591985	0.5	0.424271	0.178799	0.258669	1.05892	0.226251
180	1.76522	0.813	1.11257	0.491843	1.61877	1.1723	0.699183	1.0198	0.789314	0.606467	0.531515	0.208826	0.348641	1.22846	0.268205
MAX. Cond.	1.76522	0.813	1.11257	0.491843	1.61877	1.1723	0.699183	1.0198	0.789314	0.606467	0.531515	0.208826	0.348641	1.22846	0.268205
	MMTV-PyMT WT + PAX
Voltage (mV)	Cell1	Cell2	Cell3	Cell4	Cell5	Cell6	Cell7	Cell8	Cell9	Cell10	Cell11	Cell12	Cell13	Cell14	Cell15	Cell16	Cell17
-100	0.00142296	0.0142857	0.0147597	0.00192418	-0.000225915	-0.00329664	0.00739819	0.00222034	0.0112155	0.00460878	0	0	0	0	0	0	0
-80	0.00320903	0.00253189	0.00348746	0.00182049	-5.53103e-05	-0.000204893	0.00681131	0.00110735	0.00595028	0.00473282	0.00455556	0.00896424	0.00855615	0.00444733	0.00526316	0.00588748	0.00934744
-60	0.00212954	0.00104024	0.00766719	0.0021431	0.000102441	0.00923547	0.00666904	0.00214145	0.00307301	-0.000197519	0.00238889	0.00456227	0.00257431	0.00202211	0.00419121	0.00194136	0.00376784
-40	0.00556428	0.00192345	0.0212905	0.00577255	0.000181771	0.0247706	0.0401921	0.00803043	0.00863183	-0.00292939	0.00249306	0.00266338	0.001853	0.00140442	0.00114437	0.000824089	0.000891454
-20	0.00938175	0.00618253	0.00722309	0.0116373	0.000259673	0.0363914	0.0711364	0.0134404	0.00929732	-0.00456107	0.00504861	0.0106658	0.00609377	0.00150845	-0.00344761	0.00471474	0.0054353
0	0.0149166	0.0117763	0.0176332	0.0201636	0.000457024	0.0496024	0.096212	0.0235278	0.0156586	-0.0069084	0.010625	0.0196054	0.0149235	0.000469441	-0.00845002	0.00782092	0.00649351
20	0.0213935	0.018842	0.0280826	0.0374467	0.00108154	0.0629969	0.108483	0.0386024	0.0334703	-0.00725191	0.0181944	0.0313194	0.0246238	0.00457087	-0.0100917	0.00990491	0.00484207
40	0.0268891	0.0296369	0.0825496	0.0630257	0.00233706	0.075841	0.158456	0.0555086	0.0604815	-0.00703244	0.0286806	0.0646116	0.0447706	0.00537711	-0.015548	0.0115689	0.000301427
60	0.0331698	0.048577	0.152821	0.0980528	0.00340171	0.0899083	0.199182	0.0822767	0.0961049	-0.00682252	0.0419444	0.124538	0.0669071	0.000262679	-0.00584259	0.0117274	0.00464967
80	0.045633	0.0698724	0.22466	0.153243	0.00546611	0.102141	0.240085	0.106791	0.140341	0.0032729	0.0585417	0.17016	0.0999876	-0.00446684	-0.00118783	0.0106973	0.00103094
100	0.0645731	0.0940137	0.261233	0.225832	0.00867307	0.114985	0.298773	0.133277	0.193971	0.0736641	0.0784722	0.225647	0.136799	-0.00347854	-0.00753259	0.00236133	0.00899471
120	0.0860648	0.113837	0.333072	0.306487	0.0141522	0.126606	0.355682	0.153283	0.254453	0.105916	0.1	0.293465	0.186544	0.00115084	-0.000975374	0.00306656	0.0381594
140	0.119725	0.135427	0.28605	0.568038	0.0220722	0.138838	0.441046	0.185123	0.322959	0.149809	0.122222	0.369914	0.24002	0.0141092	0.000690488	0.00207607	0.0610871
160	0.131501	0.159961	0.339603	0.584169	0.0332381	0.151682	0.517517	0.211045	0.385594	0.219466	0.146528	0.459926	0.282303	0.0209363	0.00550459	0.0102219	0.0833734
180	0.199215	0.187439	0.445402	0.632561	0.0353155	0.166361	0.647341	0.247957	0.448229	0.287214	0.180556	0.519112	0.313394	0.0293888	0.0255432	0.022504	0.0803271
MAX. Cond.	0.199215	0.187439	0.445402	0.632561	0.0353155	0.166361	0.647341	0.247957	0.448229	0.287214	0.180556	0.519112	0.313394	0.0293888	0.0255432	0.022504	0.0803271
	MMTV-PyMT WT + IBTX
Voltage (mV)	Cell1	Cell2	Cell3	Cell4	Cell5	Cell6	Cell7	Cell8	Cell9	Cell10	Cell11	Cell12	Cell13	Cell14	Cell15	Cell16	Cell17
-100	0.00378106	0.00070678	0.00013231	-0.00076038	0.0187637	0.00224588	0.0123955	0.0176669	0.00861014	0.0213615	0.0198578	0.00028342	0.00289514	0.0112773	0.0163357	0.00787293	0.00039387
-80	0.00198055	0.00049029	0.00043744	0.0002031	0.0020204	0.00533654	0.0160167	0.00755814	0.00664336	0.0122066	0.0106398	0.00046658	0.00130954	0.00322741	0.00467509	0.00648481	0.00023733
-60	0.00190853	0.00075772	0.00073807	0.00356178	0.0162232	0.00370879	0.0152507	0.00365716	0.0126967	0.0105634	0.00282045	0.00116979	-0.00040229	0.00010903	0.00015794	0.00530387	7.019e-05
-40	0.00412315	0.00222541	0.00213771	0.0122561	0.0538108	0.00684753	0.0140669	0.00842086	0.0260052	0.0120892	0.00531988	0.00318182	-0.00191887	0.00108411	0.0015704	0.00406768	8.5003e-05
-20	0.010839	0.00445718	0.00345185	0.0230615	0.10062	0.011195	0.0139276	0.0177982	0.041521	0.019777	0.0134831	0.00508021	-0.00215452	0.00144548	0.00209386	0.00391575	0.00090894
0	0.0212459	0.00694046	0.00435644	0.0351676	0.156431	0.0146978	0.0145543	0.0333833	0.0598776	0.0232394	0.0327906	0.00744652	-0.00079785	0.0163863	0.0237365	0.00406077	0.00217135
20	0.0399712	0.0112385	0.00553555	0.0482741	0.210042	0.0412088	0.0172702	0.0557014	0.0758304	0.0433685	0.062371	0.00926471	0.00037031	0.0325857	0.0472022	0.00104282	0.0029793
40	0.0684192	0.0150907	0.0079658	0.0615308	0.270054	0.0598901	0.0189415	0.0952738	0.0861014	0.0745305	0.0983719	0.0123396	0.00730517	0.0735202	0.106498	0.00211326	0.00767548
60	0.10839	0.0182108	0.0110261	0.0755378	0.340068	0.070055	0.0207521	0.136534	0.086757	0.118545	0.133914	0.015508	0.0112439	0.0570717	0.0826715	0.00056215	0.0112776
80	0.155564	0.0213626	0.0146265	0.092046	0.428086	0.0831044	0.0201254	0.182296	0.110577	0.173122	0.182298	0.0187166	0.0200303	0.0697819	0.101083	0.00023066	0.014644
100	0.205257	0.0244827	0.0192619	0.108554	0.534107	0.119505	0.0233287	0.262566	0.10271	0.236502	0.236184	0.0217914	0.0299613	0.0971963	0.140794	-0.00068923	0.0326544
120	0.255672	0.0276345	0.0255626	0.128564	0.630126	0.155907	0.0211699	0.330083	0.157998	0.31338	0.307269	0.0292781	0.0383774	0.128972	0.186823	-7.0442e-06	0.0388823
140	0.315088	0.034384	0.0325382	0.146573	0.740148	0.114698	0.0182451	0.399475	0.194493	0.400235	0.364595	0.0393048	0.0302979	0.133333	0.193141	0.00128453	0.0350109
160	0.383507	0.0385228	0.040189	0.164082	0.85217	0.135302	0.0219359	0.478245	0.206949	0.495305	0.481541	0.0470588	0.02508	0.165732	0.240072	-0.00178177	0.0388823
180	0.450126	0.0442534	0.0490549	0.185093	0.938188	0.147665	0.0224234	0.560765	0.215035	0.598592	0.582435	0.0554813	0.0110083	0.202492	0.293321	-0.00241022	0.0336644
MAX. Cond.	0.450126	0.0442534	0.0490549	0.185093	0.938188	0.147665	0.0224234	0.560765	0.215035	0.598592	0.582435	0.0554813	0.0110083	0.202492	0.293321	-0.00241022	0.0336644

## Sheet: Fig.1B
	MMTV-PyMT BK-KO ctrl
Voltage (mV)	Cell1	Cell2	Cell3	Cell4	Cell5	Cell6	Cell7	Cell8	Cell9	Cell10	Cell11	Cell12	Cell13	Cell14	Cell15	Cell16
-100	0.00675219	0.00648315	0.00744966	0.0110123	0.00395795	0.00917722	0.00727032	0.0012627	-0.00398389	0.00471868	0.00192604	0.0133653	0.000236567	0.000280352	0.00648671	0.0123745
-80	0.00382624	0.00373048	0.00298658	0.00422025	0.00124314	0.00289873	0.00407799	0.000821791	-0.00462847	0.00509377	0.00210067	0.00746438	0.000210821	0.000268472	0.00217601	0.0139895
-60	0.00814765	0.00373048	0.000677852	0.00410397	0.00185558	0.0029557	0.00282882	0.000378578	0.00849597	0.00147037	0.00334874	0.00487959	0.000233209	0.000817296	0.00123261	0.0150589
-40	0.0192888	0.0164339	0.00345638	0.0125171	0.00534735	0.00949367	0.00288169	0.00146814	0.0239928	0.00452363	0.0129943	0.00510654	0.000241418	0.00201235	0.00344305	0.013553
-20	0.0333108	0.0284306	0.00993289	0.022777	0.0103291	0.0164557	0.00126239	0.00154201	0.0355416	0.00855214	0.0309707	0.00586307	0.000402985	0.00361131	0.00501308	0.016172
0	0.0346613	0.0513558	0.0189262	0.0300958	0.0148995	0.0226582	-0.0026768	0.00738689	0.0434199	0.0141035	0.0484335	0.00688438	0.000421642	0.004823	0.00964055	0.0202532
20	0.0477155	0.0566968	0.0333557	0.0463064	0.026691	0.0362658	0.000540648	0.0109418	0.0641898	0.0306827	0.0713919	0.0180305	0.000514925	0.00631979	0.0161135	0.0257529
40	0.0970065	0.0879211	0.0561745	0.0875513	0.0510969	0.0651899	0.00590879	0.0136657	0.107431	0.084021	0.0924499	0.0321523	0.000619403	0.00791162	0.0279576	0.0301179
60	0.155751	0.133114	0.0865772	0.144323	0.0903108	0.108228	0.0300066	0.0190905	0.138765	0.150038	0.12378	0.070609	0.000824627	0.00881445	0.0424184	0.0336098
80	0.205267	0.161052	0.120134	0.20383	0.135283	0.152532	0.0826173	0.0226454	0.173679	0.250563	0.15357	0.119909	0.000936567	0.012402	0.0605977	0.0371017
100	0.270088	0.186524	0.158389	0.247606	0.196527	0.207595	0.0898876	0.0302401	0.220233	0.337584	0.143297	0.15887	0.00102612	0.017819	0.078777	0.0456133
120	0.310601	0.253903	0.200671	0.307114	0.265996	0.261392	0.0912095	0.0496307	0.31513	0.44036	0.17925	0.204262	0.00109328	0.0230459	0.0994353	0.0460498
140	0.324105	0.312243	0.245638	0.384405	0.360146	0.31962	0.0746861	0.0535549	0.435094	0.544636	0.193118	0.282436	0.00127612	0.0342124	0.131662	0.0504147
160	0.393878	0.360723	0.298658	0.43844	0.459781	0.386709	0.085922	0.0648661	0.501343	0.630158	0.155624	0.377002	0.00123881	0.0444286	0.162512	0.056962
180	0.477155	0.43221	0.358389	0.51368	0.564899	0.439241	0.118969	0.0727147	0.583706	0.716429	0.187468	0.393393	0.00139179	0.06201	0.199697	0.0582715
MAX. Cond.	0.477155	0.43221	0.358389	0.51368	0.564899	0.439241	0.118969	0.0727147	0.583706	0.716429	0.187468	0.393393	0.00139179	0.06201	0.199697	0.0582715
	MMTV-PyMT BK-KO + PAX
Voltage (mV)	Cell1	Cell2	Cell3	Cell4	Cell5	Cell6	Cell7	Cell8	Cell9	Cell10	Cell11	Cell12	Cell13	Cell14	Cell15	Cell16	Cell17
-100	0.00892812	0.0218771	0.00788927	-0.00035054	0.0145308	0.00625512	0.0143073	0.0131287	0.00640939	0.00675381	0.0129486	0.021863	0.00269231	-0.00121382	0.0121642	0.00326608	0.00633369
-80	0.000750831	0.0111699	0.00304498	0.0001496	0.00486179	0.00383775	0.0133232	0.0046281	0.00191607	0.00282498	0.0068005	0.0149346	0.00190635	-4.7432e-05	0.00459702	0.00131148	0.00278427
-60	0.018419	0.00210839	0.00629758	0.00211979	0.00603081	0.0063917	0.0149129	0.00753247	0.00671974	0.00152505	0.00446675	0.0316397	0.000174749	0.00283847	-0.0013209	0.000245902	0.00151966
-40	0.0405475	-0.00456048	0.0129412	0.0056859	0.00831421	0.0129746	0.0160484	0.0100118	0.0203751	0.00421932	0.006399	0.0155504	0.00145485	0.00810457	-0.00433582	0.000184952	0.00532412
-20	0.0775134	-0.00152677	0.0154325	0.00897047	0.0125642	0.0269052	0.01514	0.0201181	0.0318446	0.00878722	0.0194981	0.0117013	0.00477425	0.0131653	-0.00692537	0.000886927	0.0111583
0	0.0894091	-0.00439524	0.0197232	0.012117	0.0233803	0.0491669	0.018698	0.0243211	0.039131	0.0181554	0.0351317	0.0381062	0.00801003	0.0213819	-0.00850746	0.00250525	0.0217853
20	0.131747	0.00852611	0.0434256	0.0152084	0.0255654	0.0897296	0.0191522	0.0356553	0.0711105	0.0400145	0.072522	0.0104696	0.0151338	0.0399627	0.00397761	0.0129887	0.0520723
40	0.173958	0.02538	0.0532872	0.0182998	0.0457773	0.135755	0.0163512	0.0517119	0.0709756	0.0598402	0.120954	0.0143187	0.0308528	0.0698413	0.0353731	0.032871	0.0899044
60	0.21361	0.0542631	0.202422	0.0213083	0.0836884	0.187107	0.0196821	0.083353	0.116583	0.0748003	0.178419	0.0135489	0.0545151	0.120448	0.0643284	0.0651534	0.112646
80	0.221284	0.0951751	0.262976	0.0239304	0.121272	0.255395	0.0182438	0.117591	0.14438	0.0951344	0.25345	0.008699	0.0766722	0.168067	0.0932836	0.104666	0.148778
100	0.217447	0.150033	0.264706	0.0268838	0.186824	0.345534	0.0188494	0.177804	0.176764	0.120552	0.281054	0.0082371	0.110368	0.213819	0.137313	0.155107	0.182784
120	0.223842	0.210839	0.226644	0.0292575	0.235988	0.408358	0.0211961	0.250295	0.232087	0.142338	0.33877	0.00877598	0.140468	0.268908	0.191045	0.20681	0.205101
140	0.291635	0.288169	0.33737	0.0311896	0.304818	0.476646	0.0267979	0.299882	0.318446	0.162672	0.371393	0.0112394	0.191472	0.338002	0.245522	0.261034	0.248672
160	0.300588	0.366821	0.247405	0.0331217	0.362723	0.558591	0.0198335	0.340024	0.41155	0.187364	0.439147	0.00831409	0.239967	0.380019	0.312687	0.308113	0.301807
180	0.500128	0.486451	0.427336	0.0350538	0.473069	0.659656	0.0248297	0.391972	0.506005	0.222222	0.481807	0.00808314	0.250836	0.404295	0.383582	0.359395	0.356004
MAX. Cond.	0.500128	0.486451	0.427336	0.0350538	0.473069	0.659656	0.0248297	0.391972	0.506005	0.222222	0.481807	0.00808314	0.250836	0.404295	0.383582	0.359395	0.356004
	MMTV-PyMT BK-KO + IBTX
Voltage (mV)	Cell1	Cell2	Cell3	Cell4	Cell5	Cell6	Cell7	Cell8	Cell9	Cell10	Cell11	Cell12	Cell13	Cell14	Cell15	Cell16	Cell17	Cell18	Cell19
-100	0.00020411	0.0702532	0.0157636	0.00539419	0.00242096	0.0121872	0.0129213	0.00402397	0.00396285	0.00365517	0.0141427	-0.0199672	0	0	0	0	0	0	0
-80	0.00270378	0.0275949	0.0120338	0.00435685	0.00139115	0.0069786	0.0141152	0.001875	0.00383901	0.00230172	0.00659753	0.00228392	0.0188841	0.0126803	0.00644928	0.00237085	0.00650215	0.00312587	0.00860841
-60	0.0218688	0.0051962	0.014145	0.00459025	0.00277326	0.00149438	0.0172051	0.00051798	0.00396285	0.00137069	0.00598963	0.00556619	0.0157082	0.00584435	0.0638587	0.00270295	0.00553648	0.00124476	0.00279612
-40	0.0286282	0.0176582	0.0165377	0.00484959	0.00552846	0.00541893	0.0133427	0.0013613	0.00460268	0.00296552	0.0151261	0.0158643	0.0157082	0.00096905	0.00789855	0.00302583	0.00482117	0.00211888	0.001411
-20	0.0616302	0.0579114	0.0103448	0.00596473	0.0109304	0.0187885	0.0141854	0.0035274	0.00400413	0.00541379	0.0277132	0.0273523	0.015794	0.00122596	0.00721014	0.00531365	0.0066166	0.00748252	0.00542395
0	0.100862	0.134177	0.0106967	0.00560166	0.0278229	0.0205296	0.0150983	0.00586473	0.00458204	0.00965517	0.0411228	0.0385667	0.0127039	0.00261418	0.00780797	0.00725092	0.00562232	0.0146853	0.0101618
20	0.176276	0.26962	0.0159747	0.00549793	0.0438121	0.0414944	0.0143258	0.0146832	0.00474716	0.022069	0.0613267	0.0601751	0.020515	0.0109075	0.00836051	0.0129151	0.00575823	0.0276224	0.0236893
40	0.220013	0.385443	0.0135116	0.00521266	0.0587172	0.0654334	0.0151685	0.0354024	0.00408669	0.0409483	0.107456	0.0754923	0.0150215	0.0256911	0.0106884	0.0461255	0.00729614	0.055035	0.0338511
60	0.290258	0.491139	0.0205489	0.00606846	0.0837398	0.103736	0.0148174	0.0595034	0.00474716	0.0634483	0.16324	0.0856127	0.0138197	0.0432692	0.010779	0.071679	0.00815451	0.0881119	0.0633657
80	0.365805	0.510127	0.0215341	0.0060166	0.102078	0.147262	0.0155197	0.0894692	0.00610939	0.1	0.264616	0.0972374	0.0122747	0.0695613	0.0172101	0.0801661	0.00901288	0.11958	0.101618
100	0.446653	0.478481	0.0274455	0.0061722	0.129178	0.184258	0.0155197	0.116438	0.00536636	0.137931	0.2968	0.118435	0.0134764	0.115835	0.0167573	0.0931734	0.00751073	0.167133	0.149515
120	0.500994	0.517089	0.0247713	0.0063278	0.151762	0.241567	0.0169944	0.15625	0.00668731	0.172414	0.33971	0.130197	0.0138197	0.169772	0.0193841	0.123616	0.00951359	0.215385	0.189644
140	0.552684	0.651899	0.0199156	0.0060944	0.195122	0.310482	0.0176264	0.193493	0.00569659	0.2	0.407652	0.153173	0.0118455	0.19982	0.0197464	0.154982	0.0112303	0.278322	0.23754
160	0.510272	0.696203	0.0246305	0.00835062	0.231256	0.393181	0.0185393	0.250428	0.0051806	0.232759	0.514929	0.184628	0.0146781	0.219351	0.0200181	0.187269	0.00965665	0.336364	0.291262
180	0.516899	0.816456	0.0128079	0.00718361	0.284553	0.472978	0.0158708	0.310788	0.00650155	0.262931	0.674057	0.202407	0.0139914	0.235877	0.0222826	0.22417	0.0149499	0.395105	0.327508
MAX. Cond.	0.516899	0.816456	0.0128079	0.00718361	0.284553	0.472978	0.0158708	0.310788	0.00650155	0.262931	0.674057	0.202407	0.0139914	0.235877	0.0222826	0.22417	0.0149499	0.395105	0.327508

## Sheet: Fig.1C
MMTV-PyMT
WT	BK-KO
4.79775	4.97895
5.85718	4.48378
6.0571	3.94078
5.48251	5.50216
5.26452	6.20985
4.57772	5.34263
4.38517	5.42037
4.79857	5.69549
4.4932	4.34172
4.6486	5.16684
3.44874	4.17645
3.28197	4.08436
3.40163	5.17092
3.24433	4.09215
3.07327	4.39409
5.69397	3.72486
7.20492	3.66286
5.84755	4.09172
4.83333	7.92195
5.78997	5.90385
4.59597	6.0232
4.02738	5.78557
4.03258	6.09619
4.12487	6.94282
4.09371	6.99597
3.62918	7.32194
3.49251	6.50107
4.02702	6.15359
3.54489	4.10505
3.63481	4.71599

## Sheet: Fig.1D
	MDA-MB-453 ctrl
Voltage (mV)	Cell1	Cell2	Cell3	Cell4	Cell5	Cell6	Cell7	Cell8	Cell9	Cell10	Cell11	Cell12	Cell13	Cell14	Cell15	Cell16	Cell17	Cell18	Cell19	Cell20	Cell21	Cell22	Cell23	Cell24	Cell25	Cell26	Cell27	Cell28	Cell29	Cell30
-100	0.0144202	0.00613105	0.0075102	0.00106318	0.0108492	-0.00254112	-0.00030414	-0.00972727	0.0149049	-0.00051868	0.0162207	0.00114099	0.00263046	0.0204484	-0.0186501	-0.0418908	-0.00344114	-0.00869565	-0.0253015	0.00706953	-0.0273636	0.0169603	0.00234578	-0.00321951	-0.00492907	-0.00010939	-0.0026677	0.000136328	-0.00659743	-0.0124601
-80	0.0249247	0.00354914	0.0237143	1.1981e-05	0.00787809	-0.00152961	0.00108273	0.00141818	0.00573384	0.00025846	0.00083612	-0.00261749	-0.00077032	0.00533172	-0.00567496	-0.010269	-0.0012445	-0.0026913	-0.00794442	-0.00239151	-0.00930303	0.00708979	-0.00114448	-0.00290854	-0.0006516	0.000961714	-0.00045815	0.000275253	0.00237019	-0.00424332
-60	0.0158509	0.00381435	0.0359184	0.0233081	0.00782059	0.00476974	0.00504866	0.0198182	0.0135361	0.00116044	0.00682274	0.00907793	0.0123536	0.00301424	0.0108348	0.0309699	0.0022458	0.00386957	0.0121133	0.00540131	0.0165454	0.00511569	0.00660714	0.00884146	0.00286126	0.00265269	0.00177653	0.000573877	0.0238241	0.00618101
-40	0.0292922	0.00587363	0.0657143	0.0601104	0.0142419	0.0185033	0.0136456	0.0472727	0.0340684	0.00659341	0.0233278	0.0296252	0.0335108	0.00902757	0.0327709	0.0920945	0.00719276	0.0119565	0.0352648	0.0208819	0.0484849	0.0180429	0.025974	0.0363415	0.00692474	0.00371468	0.011676	0.00132433	0.067807	0.0157959
-20	0.0628765	0.0134945	0.127755	0.113269	0.0224267	0.0414474	0.0235199	0.0767273	0.0631179	0.0264176	0.0494147	0.0602023	0.055733	0.0189337	0.0547957	0.161369	0.0139457	0.0204783	0.0582066	0.0503966	0.0809091	0.0447888	0.0551136	0.0731707	0.0123106	0.00448496	0.0338295	0.00183069	0.154551	0.0264901
0	0.0798193	0.0389236	0.204898	0.169086	0.0369944	0.0728618	0.0324412	0.112727	0.0775665	0.0610989	0.083612	0.0979179	0.0937167	0.0348379	0.0781527	0.236349	0.0274256	0.0298696	0.0845569	0.0892441	0.125758	0.0851199	0.0909091	0.122561	0.0225535	0.00925251	0.062053	0.00482991	0.261454	0.041452
20	0.0997741	0.0795632	0.293469	0.241259	0.0603795	0.108553	0.0492701	0.155455	0.113308	0.101099	0.12709	0.147531	0.14022	0.0684641	0.124334	0.325183	0.0442432	0.0400435	0.120739	0.132991	0.181818	0.175971	0.130682	0.177439	0.0379899	0.0201459	0.0958825	0.0136328	0.379963	0.0723571
40	0.201807	0.128705	0.288163	0.304641	0.0960322	0.145559	0.0746148	0.225455	0.186312	0.145055	0.177258	0.208209	0.214413	0.113299	0.178508	0.410758	0.0633894	0.0543478	0.156004	0.181988	0.246364	0.2993	0.178571	0.238415	0.0538591	0.0376481	0.131065	0.0276552	0.572389	0.110621
60	0.310617	0.185647	0.518367	0.325087	0.142419	0.179276	0.107056	0.316364	0.28289	0.18989	0.23495	0.279595	0.312389	0.169646	0.232682	0.475143	0.084088	0.0778261	0.190089	0.229818	0.321212	0.450011	0.229708	0.302439	0.0702092	0.0619872	0.169341	0.0347962	0.714722	0.148884
80	0.406627	0.24805	0.477551	0.374157	0.195515	0.217928	0.143958	0.42	0.4	0.236484	0.299331	0.364069	0.447284	0.242351	0.288632	0.530562	0.11229	0.104348	0.229418	0.285814	0.409091	0.621949	0.284091	0.37439	0.0937725	0.088423	0.166441	0.0536224	0.818571	0.187147
100	0.557229	0.316693	0.644898	0.415048	0.258769	0.254112	0.186334	0.542727	0.531559	0.293626	0.369565	0.469958	0.596379	0.318085	0.346359	0.669112	0.142044	0.137391	0.266125	0.338311	0.49697	0.812991	0.344968	0.447561	0.123107	0.116682	0.193311	0.0745261	0.891875	0.223694
120	0.756777	0.397036	0.677551	0.507054	0.327775	0.289474	0.233171	0.685455	0.680608	0.356484	0.448161	0.581797	0.805822	0.402908	0.40675	0.831296	0.172574	0.172609	0.322496	0.405973	0.578788	1.02738	0.417208	0.52378	0.162539	0.146308	0.224241	0.0773825	1.00794	0.25509
140	0.92244	0.4883	0.746939	0.7156	0.398697	0.321546	0.287916	0.837273	0.844106	0.403956	0.531773	0.705532	0.969116	0.489246	0.463588	0.994295	0.198706	0.208696	0.380178	0.459636	0.678788	1.27574	0.526786	0.603049	0.192594	0.166819	0.257104	0.0967281	1.41723	0.28207
160	1.14458	0.572543	0.869388	0.834185	0.48687	0.352796	0.344688	1.00909	1.01141	0.487912	0.612876	0.824509	1.09336	0.59073	0.529307	1.17359	0.233894	0.250435	0.432617	0.514466	0.766667	1.52622	0.586039	0.689024	0.222409	0.17639	0.26677	0.121137	1.41723	0.301692
180	1.44578	0.684087	0.979592	0.950726	0.57696	0.373355	0.403487	1.18182	1.23194	0.575824	0.699833	0.967281	1.15016	0.698273	0.591474	1.36104	0.263907	0.29087	0.503409	0.578628	0.845455	1.8149	0.62987	0.77439	0.257273	0.163628	0.303499	0.128798	1.42944	0.252637
MAX. Cond.	1.44578	0.684087	0.979592	0.950726	0.57696	0.373355	0.403487	1.18182	1.23194	0.575824	0.699833	0.967281	1.15016	0.698273	0.591474	1.36104	0.263907	0.29087	0.503409	0.578628	0.845455	1.8149	0.62987	0.77439	0.257273	0.163628	0.303499	0.128798	1.42944	0.252637
	MDA-MB-453 + PAX
Voltage (mV)	Cell1	Cell2	Cell3	Cell4	Cell5	Cell6	Cell7	Cell8	Cell9	Cell10	Cell11	Cell12	Cell13	Cell14	Cell15	Cell16	Cell17	Cell18	Cell19	Cell20	Cell21	Cell22
-100	0.0151485	0.00164984	0.00848444	0.00221022	0.0031775	4.20898e-06	-0.0092665	0.00147829	0.00645564	0.013542	0.00267218	0.000978321	0.00368712	0.00264286	0.00340509	0.00438053	-0.00298578	3.43784e-05	-0.00158289	0.00146541	0.00398497	0.00501623
-80	0.0113109	0.00129525	0.00420839	0.000448691	0.00100634	0.000320824	-0.00229829	0.00128672	0.00226989	0.00285008	0.00104683	0.000422457	0.001167	0.001125	0.00142857	0.00176991	-0.00025765	0.00030113	-0.00148128	0.000855346	0.00326637	0.0018442
-60	0.0019592	-0.00011647	0.00109202	0.00122559	0.00203645	0.00259014	0.00627139	0.002053	0.000188671	0.00152059	0.000804408	0.000372429	0.000623742	0.00188393	0.00114481	0.00138643	0.00107712	0.000707255	0.00326738	0.000874214	0.00081496	0.00156388
-40	-0.0048576	0.00228761	0.00202977	0.00327378	0.00689382	0.00682119	0.0169927	0.00648148	-0.00100791	0.00784185	0.00213223	0.00100889	0.00205734	0.00564286	0.00365949	0.00440266	0.00254201	0.00146919	0.011016	0.00213837	0.00127878	0.000658011
-20	-0.00626136	0.00849544	0.0034912	0.00540091	0.0138273	0.0129507	0.0282396	0.0123882	-0.00259059	0.0142504	0.00393939	0.00193997	0.00394366	0.0104464	0.010274	0.0079646	0.00461008	0.00411958	0.0231551	0.00389937	0.00455659	0.0110947
0	-0.00320137	0.0139375	0.00797023	0.0107187	0.0240095	0.0211921	0.0374083	0.0200511	-0.00354019	0.0260297	0.00716253	0.0028627	0.00658954	0.0146429	0.0120352	0.0174041	0.00646273	0.0073642	0.0413369	0.00603774	0.00961947	0.0262614
20	0.0284791	0.0232701	0.0142084	0.0200249	0.0377179	0.0292862	0.0476773	0.034802	0.000574761	0.030313	0.0139394	0.00480823	0.00870221	0.0275893	0.0229941	0.0333333	0.0109436	0.0115202	0.0550802	0.0091195	0.0215581	0.0399823
40	0.0644314	0.0423541	0.0258457	0.0341088	0.0586371	0.043635	0.0612469	0.0501277	0.0089546	0.0448105	0.0266116	0.00814341	0.0151911	0.0472321	0.041683	0.0627581	0.0193882	0.0216187	0.0609626	0.0142767	0.0416463	0.0719976
60	0.121188	0.0650086	0.0377537	0.0490237	0.0871632	0.0695364	0.0808068	0.0676884	0.0217409	0.0907743	0.0426997	0.0128127	0.022334	0.071875	0.0709393	0.0973451	0.031969	0.034342	0.0764706	0.0220755	0.0703903	0.0991443
80	0.206019	0.0952967	0.0520974	0.0681346	0.117274	0.0927152	0.0987775	0.0855683	0.0335693	0.144975	0.0600551	0.0190384	0.0315392	0.0973214	0.0998043	0.139381	0.0508402	0.0499453	0.084492	0.0359748	0.111383	0.130865
100	0.29388	0.125092	0.0657645	0.0897383	0.152139	0.117734	0.118582	0.105683	0.0508122	0.191104	0.0798898	0.0261256	0.0445674	0.121429	0.129159	0.188053	0.0723826	0.0699964	0.0935829	0.0523899	0.156949	0.182945
120	0.39083	0.15341	0.0824087	0.11425	0.191363	0.140545	0.138142	0.12931	0.0737193	0.204283	0.104683	0.0341857	0.0628773	0.15625	0.172211	0.237463	0.0956484	0.0944222	0.102674	0.072327	0.213947	0.243435
140	0.465563	0.186654	0.107307	0.137516	0.23336	0.163355	0.165037	0.155492	0.0953769	0.247117	0.132231	0.0439133	0.0809859	0.186607	0.237769	0.29056	0.129255	0.118483	0.107487	0.0943396	0.284174	0.299498
160	0.529186	0.210539	0.134641	0.163274	0.277734	0.195732	0.185819	0.185185	0.119117	0.253707	0.163085	0.0555864	0.10161	0.222321	0.276908	0.35472	0.156829	0.145461	0.180214	0.11761	0.359301	0.377693
180	0.594829	0.22556	0.165088	0.191525	0.321315	0.238411	0.206601	0.218391	0.145773	0.311367	0.199449	0.0669817	0.121227	0.263393	0.325832	0.417404	0.187419	0.172803	0.212834	0.147799	0.439327	0.436707
MAX. Cond.	0.594829	0.22556	0.165088	0.191525	0.321315	0.238411	0.206601	0.218391	0.145773	0.311367	0.199449	0.0669817	0.121227	0.263393	0.325832	0.417404	0.187419	0.172803	0.212834	0.147799	0.439327	0.436707
	MDA-MB-453 + IBTX
Voltage (mV)	Cell1	Cell2	Cell3	Cell4	Cell5	Cell6	Cell7	Cell8	Cell9	Cell10	Cell11	Cell12	Cell13	Cell14	Cell15	Cell16	Cell17	Cell18	Cell19	Cell20	Cell21	Cell22	Cell23	Cell24
-100	-0.0146604	0.0115953	0.00435473	0.00947323	0.00453958	0.012154	0.0183794	0.0136616	0.00304133	0.00512488	0.000923077	0.00237427	0.00632764	0.00109692	0.000122671	0.00291789	-5.58046e-05	-0.0606834	0.00288153	0.00946619	0.0151321	0.00532081	0.00039774	0.0290237
-80	-0.000318	0.0112114	0.00367968	0.0104921	0.00287022	0.00267724	0.00600132	0.0049792	0.00181898	0.00190809	0.000615385	0.00103509	0.00190994	0.000579295	0.000118372	0.00129032	0.000354101	-0.0161233	0.000948795	0.00319573	0.00840673	0.00158581	0.000217344	0.0109235
-60	0.0262307	0.00908044	0.00344805	0.0119662	0.00263866	0.00119514	-0.00270751	-0.000252427	0.00186263	0.00105894	0.000992556	1.96491e-05	0.00159938	0.000121366	0.000616222	0.000458211	0.000428059	0.0235664	0.00124498	0.000740214	0.0108086	0.00333855	0.000560748	-0.00130343
-40	0.0497664	0.0100595	0.00873594	0.0159332	0.00235864	0.00911546	-0.006917	-0.000443135	0.00397264	0.00175824	0.000818859	-9.76608e-05	0.00477484	0.000204846	0.000802522	0.000412023	0.000856118	0.0581304	0.00717871	0.00235587	0.0268215	0.0112154	0.00145186	0.000960422
-20	0.0402443	0.0120752	0.0180013	0.0221114	0.0103931	0.0250169	-0.00942029	0.00171983	0.00512224	0.00227772	0.00159801	-0.000128947	0.00892857	0.00259912	0.00138722	0.00214809	0.00192739	0.0877848	0.022992	0.00525267	0.0466773	0.0274735	0.00260813	0.00688654
0	0.0524614	0.0167403	0.0343481	0.030349	0.0307485	0.0479406	-0.00889328	0.00894591	0.00745052	0.00335664	0.0109677	0.000406433	0.0128882	0.012489	0.00587561	0.00368035	0.004684	0.113904	0.0457831	0.0123132	0.0630104	0.0486872	0.00386872	0.00163852
20	0.0585699	0.0280284	0.0536069	0.0407544	0.0624663	0.070898	-0.00102767	0.0212899	0.0106228	0.00836164	0.0351861	0.00333333	0.026087	0.0273128	0.0184293	0.00762463	0.0109144	0.143755	0.0753012	0.031032	0.0856685	0.0775517	0.00665073	0.0247493
40	0.0610852	0.0403148	0.0800794	0.0593974	0.103931	0.0992573	0.0185112	0.035853	0.0177532	0.0216783	0.0694789	0.0101754	0.0472826	0.0440529	0.0406993	0.0146628	0.0194307	0.168892	0.103414	0.0562278	0.128102	0.102939	0.0131928	0.0437995
60	0.0639598	0.0597044	0.0986102	0.0791242	0.144857	0.125253	0.0447299	0.05319	0.0293946	0.0425574	0.11067	0.0185965	0.074146	0.0627753	0.061049	0.0228739	0.027342	0.202278	0.128012	0.0896797	0.186549	0.13615	0.0208433	0.0733509
80	0.0641394	0.0867729	0.117803	0.099935	0.188476	0.149561	0.0889328	0.0728155	0.0455471	0.0659341	0.160794	0.0278363	0.104814	0.0817181	0.0862711	0.0380499	0.035186	0.231736	0.157631	0.12669	0.258607	0.179099	0.0276027	0.11372
100	0.0679123	0.10693	0.158173	0.121396	0.231018	0.174207	0.148221	0.0950069	0.0627183	0.0944056	0.212407	0.0374269	0.142081	0.101101	0.122098	0.0615836	0.0432541	0.263158	0.187249	0.170107	0.334668	0.215615	0.0362965	0.112137
120	0.068631	0.140142	0.188617	0.138955	0.281099	0.202566	0.200264	0.117198	0.0844005	0.127872	0.272953	0.0482456	0.180124	0.120705	0.156492	0.0909091	0.0506499	0.288688	0.213353	0.217082	0.41233	0.260824	0.0428168	0.11372
140	0.06917	0.17105	0.199206	0.159549	0.333333	0.236327	0.23913	0.138696	0.108847	0.15984	0.333002	0.0587719	0.225155	0.138106	0.192319	0.129032	0.0569251	0.318146	0.247992	0.262633	0.502002	0.293862	0.046729	0.14723
160	0.096299	0.205414	0.234282	0.173206	0.376414	0.26266	0.290514	0.160888	0.135768	0.202797	0.395533	0.0692982	0.271739	0.156608	0.226139	0.171554	0.0614074	0.335821	0.282129	0.303203	0.592474	0.330377	0.0499891	0.248021
180	0.096299	0.247648	0.249504	0.172773	0.399569	0.294058	0.361001	0.18932	0.168801	0.236763	0.46402	0.0818713	0.315994	0.17489	0.255374	0.244868	0.0654415	0.32011	0.325803	0.353737	0.68695	0.366893	0.0560748	0.353562
MAX. Cond.	0.096299	0.247648	0.249504	0.172773	0.399569	0.294058	0.361001	0.18932	0.168801	0.236763	0.46402	0.0818713	0.315994	0.17489	0.255374	0.244868	0.0654415	0.32011	0.325803	0.353737	0.68695	0.366893	0.0560748	0.353562

## Sheet: Fig.1E
	MCF-7 ctrl
Voltage (mV)	Cell1	Cell2	Cell3	Cell4	Cell5	Cell6	Cell7	Cell8	Cell9	Cell10	Cell11	Cell12	Cell13	Cell14	Cell15	Cell16
-100	-0.00744354	-0.00524397	-0.00212703	0.00025162	-0.00068999	0.0229634	-0.00031891	0.00016288	0.0012374	0.0260896	-0.00622995	-0.0111408	-0.0111408	-0.0192496	-0.00530856	0.117034
-80	-0.00149955	5.4263e-05	-0.00036216	0.00097493	0.00075451	0.012508	0.0005088	0.00065059	0.00163153	0.00907857	-0.00379679	-0.00540107	-0.00540107	0.00876253	-0.00289317	0.0390112
-60	0.00614273	0.00298123	0.0011973	0.00199629	0.00322581	0.00840282	0.00157625	0.00100546	0.0016407	0.00648469	0.00255793	0.00480392	0.00480392	-0.00715451	0.00509622	0.00432599
-40	0.0119241	0.00468633	0.00278378	0.00285051	0.00694369	0.00221937	0.00259531	0.00116015	0.0020165	0.0164379	0.00989305	0.0178253	0.0178253	0.0195992	-0.0186463	0.00019699
-20	0.0166215	0.00647721	0.00443243	0.00363974	0.0119191	-0.00223861	0.00360704	0.00135123	0.00229148	0.0303122	0.0123886	0.0297683	0.0297683	0.0591937	0.0256138	0.0029355
0	0.0230352	0.00715282	0.00643243	0.00464253	0.0179333	-0.00601668	0.00453812	0.00174249	0.00255729	0.0443372	0.0132799	0.0469697	0.0469697	0.0932184	0.0406768	0.00155079
20	0.0330623	0.00873995	0.00837838	0.00706592	0.0252597	-0.00391276	0.00514663	0.00213376	0.00270394	0.0892776	0.0237077	0.0606061	0.0606061	0.135167	0.0593895	-0.00038625
40	0.0455285	0.0113673	0.0105135	0.00893222	0.0351011	0.00368185	0.00625367	0.00309827	0.00323556	0.155331	0.0275401	0.0758467	0.0758467	0.156141	0.075647	-0.002163
60	0.0595303	0.0147989	0.0132973	0.0114206	0.0486605	0.0179602	0.00740469	0.00404914	0.00412466	0.239783	0.0336898	0.100713	0.100713	0.162433	0.0975448	-0.00276168
80	0.0816622	0.0187668	0.0164324	0.014299	0.0663751	0.0392559	0.00872434	0.00605096	0.00459212	0.339315	0.0402852	0.12656	0.12656	0.185738	0.123424	0.00141174
100	0.103884	0.0217694	0.0195135	0.018663	0.0924002	0.0641437	0.0102639	0.00932666	0.00702108	0.459961	0.0606952	0.153298	0.153298	0.230016	0.124088	-0.00208575
120	0.130985	0.0273458	0.0236487	0.0238626	0.122471	0.0981398	0.0121701	0.0140582	0.0114574	0.592671	0.0708556	0.183601	0.183601	0.316942	0.116788	0.0285825
140	0.150858	0.0315281	0.0272973	0.0294336	0.158557	0.137267	0.0147361	0.0191993	0.0281393	0.734429	0.0971479	0.213012	0.213012	0.377534	0.12077	0.0683662
160	0.177055	0.0360322	0.0318919	0.0357475	0.199016	0.186658	0.0167155	0.0242948	0.0338222	0.891268	0.123886	0.243316	0.243316	0.447448	0.151958	0.0911549
180	0.233966	0.0427882	0.0378378	0.0442897	0.254784	0.238615	0.0201613	0.0301638	0.0449129	1.05263	0.228164	0.278966	0.278966	0.603589	0.191108	0.132677
MAX. Cond.	0.233966	0.0427882	0.0378378	0.0442897	0.254784	0.238615	0.0201613	0.0301638	0.0449129	1.05263	0.228164	0.278966	0.278966	0.603589	0.191108	0.132677
	MCF-7 + PAX
Voltage (mV)	Cell1	Cell2	Cell3	Cell4	Cell5	Cell6	Cell7	Cell8	Cell9	Cell10	Cell11	Cell12	Cell13	Cell14	Cell15	Cell16	Cell17	Cell18	Cell19
-100	0.0267668	0.0560317	0.00121613	0.00837619	0.00459168	0.00655786	0.0267668	0.0560317	0.00121613	0.00837619	0.00459168	0.00655786	0.00403047	0.0101206	0.00048782	0.0143905	0.0125962	0.00909677	-0.00137187
-80	0.0270318	0.0206349	0.00152016	0.00652094	0.00302003	0.00366963	0.0270318	0.0206349	0.00152016	0.00652094	0.00302003	0.00366963	0.0083795	0.0079242	0.00073086	0.0161893	0.0102169	0.00903226	9.4011e-05
-60	0.0239399	-0.0062381	0.00202247	0.00382072	0.00278377	0.00186944	0.0239399	-0.0062381	0.00297422	0.00382072	0.00278377	0.00316518	0.00921053	0.00620155	0.00088167	0.0199253	0.0111966	0.0105807	0.00152507
-40	0.0276502	-0.0178571	0.00307997	0.00181301	0.00313303	0.00077052	0.0276502	-0.0178571	0.00812954	0.00181301	0.0040678	0.00648863	0.0201523	0.0118863	0.00153132	0.0297495	0.0258223	0.0220645	0.00360724
-20	0.0269435	-0.011746	0.00404494	-0.00030492	0.00213662	-0.00206726	0.0269435	-0.011746	0.0124256	0.00118846	0.0042527	0.00946588	0.03241	0.0185616	0.00269142	0.0589456	0.0395381	0.0347742	0.00502786
0	0.030477	-0.0278571	0.00609385	-0.0025349	0.00357473	-0.00041345	0.030477	-0.0278571	0.01692	-3.2513e-05	0.00418079	0.0140455	0.0443906	0.0238157	0.00344548	0.0733361	0.0568929	0.0492903	0.00738162
20	0.0305654	-0.0103175	0.00727032	-0.00892726	0.0117103	-0.00107814	0.0338339	-0.0103175	0.02115	-0.00367377	0.0117103	0.0138477	0.0560249	0.0282084	0.00507541	0.0992113	0.0713786	0.0623226	0.0086351
40	0.0281802	0.0101587	0.00846001	-0.00764144	0.0250642	0.00230465	0.0424028	0.0101587	0.0261071	-0.00578619	0.0250642	0.0137488	0.0664127	0.0348837	0.00597448	0.128546	0.0853744	0.0825807	0.0111421
60	0.0311837	0.0473016	0.00958361	-0.00010562	0.0422188	0.00594461	0.0430212	0.0473016	0.0311302	-0.00010562	0.0423215	0.0156281	0.0713296	0.0420327	0.0075406	0.156358	0.0972708	0.0993548	0.0126741
80	0.0305654	0.124603	0.0128883	0.00857825	0.0676939	0.0130564	0.0523852	0.124603	0.037343	0.00857825	0.0676939	0.0130564	0.0851801	0.0490956	0.0100348	0.177114	0.106368	0.103226	0.0146936
100	0.0363958	0.184127	0.0145407	0.0211242	0.104777	0.034817	0.0638693	0.184127	0.040846	0.0211242	0.104777	0.034817	0.0962604	0.0512489	0.011891	0.195102	0.135759	0.129032	0.016922
120	0.0408127	0.20873	0.0167217	0.0262675	0.149974	0.0623145	0.0623675	0.215873	0.0440846	0.0262675	0.149974	0.0623145	0.103878	0.0572782	0.012239	0.211706	0.157453	0.139355	0.0192201
140	0.0339223	0.255556	0.0187706	0.0319618	0.224961	0.0967359	0.0716431	0.255556	0.0491738	0.0319618	0.224961	0.0978239	0.122576	0.0650301	0.0114269	0.221392	0.183345	0.156774	0.0213788
160	0.0363958	0.326984	0.0221414	0.0383909	0.305085	0.163205	0.0603357	0.326984	0.0553206	0.0391256	0.305085	0.163205	0.15097	0.0809647	0.0111949	0.262903	0.207838	0.181935	0.0310585
180	0.0433746	0.172222	0.0249835	0.039493	0.518747	0.193867	0.0629859	0.172222	0.0579643	0.0409625	0.520801	0.193867	0.180748	0.0977606	0.0132251	0.28781	0.23373	0.24129	0.0807799
MAX. Cond.	0.0433746	0.172222	0.0249835	0.039493	0.518747	0.193867	0.0629859	0.172222	0.0579643	0.0409625	0.520801	0.193867	0.180748	0.0977606	0.0132251	0.28781	0.23373	0.24129	0.0807799
	MCF-7 + PAX
Voltage (mV)	Cell1	Cell2	Cell3	Cell4	Cell5	Cell6	Cell7	Cell8	Cell9	Cell10	Cell11	Cell12	Cell13	Cell14	Cell15
-100	-0.00368088	-0.00755124	-0.00813043	0.0161443	-0.0004745	0.0146847	0.00105409	0.0015657	0.0162113	0.00087248	0.0153705	0.00079324	0.0154013	-0.00100259	0.0171032
-80	-0.00056048	-0.00065534	-0.0018087	0.0177588	0.00063415	0.0146847	0.00121359	0.00160298	0.0105191	0.00136242	0.011919	0.00120266	0.0161244	0.00161404	0.0181818
-60	0.00332949	0.00682309	0.00313043	0.0164292	0.00126829	0.0185586	0.00140777	0.00190121	0.0121585	0.00155034	0.00998619	0.00125384	0.0169197	0.00485391	0.018567
-40	0.00541475	0.0187433	0.00695652	0.0186135	0.00222616	0.0164865	0.00153259	0.00189189	0.0204463	0.00241611	0.0104004	0.00189867	0.0219812	0.00782281	0.0193374
-20	0.00915899	0.0300701	0.0104783	0.0197531	0.00303769	0.0192793	0.00182386	0.00228332	0.0350182	0.00258389	0.0146342	0.00310133	0.023355	0.0110862	0.0187981
0	0.0123272	0.045712	0.0140435	0.0254511	0.00421729	0.0187387	0.0018932	0.00286114	0.0555556	0.0038255	0.0194662	0.00430399	0.0248735	0.0122526	0.0231125
20	0.0121544	0.0552859	0.0177391	0.0287749	0.00669623	0.0236937	0.00249653	0.0027959	0.140255	0.00751678	0.0312011	0.00542477	0.0279827	0.015787	0.0231125
40	0.0212558	0.0608145	0.021	0.0377968	0.00784922	0.0199099	0.00312067	0.00303821	0.234517	0.00973154	0.0501611	0.00696008	0.0330441	0.0201461	0.0201849
60	0.0402074	0.0775351	0.0251304	0.0433998	0.00997783	0.0221622	0.00429958	0.00316869	0.325592	0.0102013	0.0736309	0.00726714	0.0339118	0.0281574	0.025963
80	0.0685484	0.102211	0.029087	0.0396961	0.0106874	0.0186486	0.00569348	0.00342032	0.452641	0.0090604	0.103543	0.0101842	0.0384671	0.039114	0.0255008
100	0.100806	0.111516	0.0327391	0.0549857	0.0123282	0.0228829	0.00852982	0.00418453	0.614754	0.0111409	0.139439	0.010696	0.0433839	0.0472432	0.0261941
120	0.0985023	0.110437	0.0369565	0.0534663	0.0165854	0.0225225	0.012344	0.00501398	0.79235	0.0102013	0.181316	0.013306	0.0508315	0.0686852	0.0251926
140	0.106567	0.112325	0.0418261	0.0622982	0.0203548	0.0242342	0.0192788	0.00702703	0.997268	0.0132886	0.228256	0.0162743	0.0577006	0.0942507	0.0279661
160	0.134793	0.109763	0.046087	0.054226	0.025765	0.0215315	0.0269071	0.00978565	1.23406	0.0156376	0.278417	0.0206755	0.0680405	0.113101	0.0293528
180	0.134793	0.112729	0.05	0.0624881	0.0308204	0.0225225	0.0404993	0.0131407	1.49818	0.0166443	0.329959	0.0484647	0.0655098	0.127238	0.0287365
MAX. Cond.	0.134793	0.112729	0.05	0.0624881	0.0308204	0.0225225	0.0404993	0.0131407	1.49818	0.0166443	0.329959	0.0484647	0.0655098	0.127238	0.0287365

## Sheet: Fig.1G
MCF-7
+BKCa - RFP	+BKCa-DEC - RFP
0.071	0.236
0.149	0.279
0.127	0.173
0.128	0.06
0.051	0.153
0.082	0.116
0.117	0.209
0.161	0.024
0.005	0.134
0.122	0.103
0.054	0.111
0.149	0.181
0.149	0.145
0.107	0.243
0.126	0.056
0.037	0.121
0.081	0.311
	0.293
	0.029
	0.279
	0.08
	0.055

## Sheet: Fig.1H
	MCF-7 + BKCa - RFP ctrl																						MCF-7 + BKCa-DEC - RFP ctrl
Voltage (mV)	Cell1	Cell2	Cell3	Cell4	Cell5	Cell6	Cell7	Cell8	Cell9	Cell10	Cell11	Cell12	Cell13	Cell14	Cell15	Cell16	Cell17	Cell18				Voltage (mV)	Cell1	Cell2	Cell3	Cell4	Cell5	Cell6	Cell7	Cell8	Cell9	Cell10	Cell11	Cell12	Cell13	Cell14	Cell15	Cell16	Cell17	Cell18
-100	-0.0481872	-0.108303	-0.160856	-0.114563	-0.000880358	-0.000429816	0.00122037	-0.00718969	-0.00809181	-0.0490988	-0.0169157	-0.0171156	-0.0152115	0.0385694	0.0389365	-0.0261976	-0.0260049	-0.234022				-100	0.00208531	0.0387511	0.0168856	-0.00315789	0.00435327	-0.00648975	-0.00518407	-0.00335945	0.0263413	-0.00175379	0.00676859	-0.00444156	0.0190187	-0.00338315	0.0232023	-0.0371403	-0.0341876	0.00808811
-80	-0.0144562	-0.0390794	-0.0717844	-0.0527613	0.00111286	0.000712488	0.00128183	-0.00151846	-0.00441044	-0.0227109	-0.0116231	0.0185056	-0.010573	0.0153226	0.0249571	-0.0143713	-0.0183757	-0.0775968				-80	0.00170616	0.0254362	0.00885645	-0.000993328	0.0016968	-0.00168155	-0.000965976	-0.00222174	0.00639163	3.32209e-05	0.00291869	-0.00272727	0.0129907	-0.00146286	0.0133269	-0.0228417	-0.0209124	0.00521586
-60	0.0244809	0.0377256	0.117492	0.0775805	0.00277307	0.00242014	0.001554	0.00626941	0.00533753	0.0193944	0.017746	0.0188532	0.0217599	-0.0165147	-0.0253002	0.0149701	0.0495488	0.0762283				-60	0.0018128	0.0213958	0.00997567	0.00358784	0.00368567	0.0123883	0.00484061	0.00507674	0.00524889	0.00711636	0.00312717	0.00306493	-0.0110748	0.00171196	0.0146692	0.0329137	0.017427	0.00812335
-40	0.0720483	0.114621	0.377967	0.236686	0.00437152	0.0053243	0.00166813	0.0286437	0.0193519	0.0461428	0.211706	-0.0241529	0.105048	-0.0202665	0.02753	0.0367515	0.248564	0.232654				-40	0.00472156	0.0401286	0.0213625	0.0134915	0.00979138	0.0348135	0.0112697	0.0183535	0.020337	0.0322934	0.00801946	0.0122078	0.0176168	0.00370018	0.020326	0.116906	0.0329062	0.0193833
-20	0.132321	0.186823	0.662174	0.404339	0.00655122	0.00712488	0.00251975	0.0790291	0.0830783	0.066907	0.609174	0.0215465	0.227149	-0.01669	0.0451115	0.0647455	0.521739	0.384563				-20	0.0200829	0.0651974	0.0347932	0.0405486	0.0190542	0.060825	0.0197488	0.0379951	0.057331	0.0820405	0.0165393	0.0338312	0.0220561	0.00625	0.0402205	0.216727	0.062532	0.0384141
0	0.187481	0.250903	0.961031	0.576923	0.00939695	0.0102614	0.00295874	0.120787	0.339334	0.0908435	1.06891	0.0227628	0.365621	0.0157433	0.0772727	0.0988024	0.817884	0.539209				0	0.0515403	0.0982553	0.0530414	0.101557	0.0310153	0.0965581	0.028872	0.0661157	0.116212	0.160202	0.0305768	0.0772727	0.0283645	0.00951087	0.0680729	0.333633	0.103024	0.0688987
20	0.247908	0.318592	1.27161	0.729783	0.0192541	0.0148112	0.00585601	0.172553	0.760576	0.127614	1.41137	0.0703736	0.511596	0.0434783	0.149228	0.166916	1.12387	0.695224				20	0.0918246	0.169881	0.0807786	0.198666	0.0547983	0.144509	0.0440056	0.100032	0.209181	0.231872	0.0579569	0.120779	0.05	0.0136775	0.117929	0.456835	0.177858	0.109956
40	0.348621	0.387184	1.58805	0.876068	0.0402034	0.0240077	0.013345	0.236972	1.35014	0.204758	1.53591	0.0775847	0.656889	0.0936185	0.256432	0.269087	1.4274	0.845764				40	0.135071	0.284665	0.133333	0.311342	0.0867872	0.199685	0.0623591	0.189975	0.33895	0.298482	0.0977067	0.119481	0.0785047	0.0192935	0.193193	0.582734	0.271656	0.171454
60	0.354819	0.448556	1.90155	0.979619	0.0825866	0.0420136	0.0368745	0.323249	1.90819	0.321557	1.57742	0.172024	0.811733	0.170056	0.403087	0.400449	1.73913	1.0661				60	0.181872	0.434343	0.200973	0.424759	0.129624	0.287704	0.0904798	0.174949	0.493899	0.358347	0.147325	0.0974026	0.116822	0.0271286	0.290508	0.714029	0.388006	0.251982
80	0.477223	0.518051	2.17697	1.10947	0.157423	0.0764763	0.100966	0.406074	2.37624	0.484499	1.87837	0.246742	0.961801	0.267532	0.586621	0.557635	2.01805	1.34802				80	0.227488	0.617998	0.284672	0.532987	0.180807	0.366527	0.125577	0.203928	0.67209	0.418212	0.205698	0.0818182	0.161215	0.037183	0.405561	0.840827	0.53306	0.336564
100	0.560892	0.601083	2.56666	1.25082	0.272463	0.122943	0.194908	0.495801	2.82628	0.656092	2.23122	0.302346	1.11869	0.382188	0.795883	0.74476	2.30517	1.68332				100	0.270735	0.831038	0.408759	0.642698	0.240612	0.461114	0.164216	0.235054	0.865776	0.337268	0.271022	0.0397403	0.211682	0.0475543	0.527325	0.971223	0.697078	0.461674
120	0.70344	0.650722	2.80105	1.38889	0.425042	0.172314	0.339772	0.568273	3.31233	0.857967	2.69822	0.438749	1.27558	0.515428	1.03774	0.946856	2.53486	2.0802				120	0.308057	1.0652	0.525547	0.733877	0.308762	0.559643	0.210368	0.290866	1.0614	0.251265	0.343294	0.0325325	0.266822	0.0597826	0.680729	1.07914	0.886725	0.577974
140	0.875426	0.730144	3.13507	1.47436	0.645435	0.24395	0.518876	0.651099	3.66337	1.11031	3.26899	0.45265	1.43929	0.673212	1.31218	1.17141	2.78917	2.58656				140	0.334716	1.32231	0.642336	0.837658	0.38943	0.672622	0.257594	0.388537	1.26089	0.275717	0.425295	0.0194156	0.321028	0.0729167	0.858102	1.20504	1.09175	0.699559
160	0.926557	0.805957	3.51597	1.55161	0.883991	0.443369	0.732221	0.593581	3.9514	1.37707	3.72561	0.559513	1.59618	0.848527	1.62093	1.41467	3.00246	3.01081				160	0.356635	1.5978	0.80292	0.919199	0.45758	0.828954	0.358484	0.505528	1.46426	0.305228	0.508687	0.0157143	0.386449	0.0837862	1.03068	1.32194	1.31215	0.835242
180	1.00558	0.911552	3.75037	1.45957	1.14071	0.620523	0.895522	0.582078	4.28443	1.62942	4.3379	1.21633	1.75307	1.04488	1.92967	1.67665	3.28138	3.38032				180	0.404028	1.90083	0.958637	1.01557	0.546592	0.931424	0.430396	0.640764	1.65601	0.337268	0.600417	0.015	0.445794	0.0978261	1.28955	1.46583	1.55305	1.00969
MAX. Cond.	1.00558	0.911552	3.75037	1.45957	1.14071	0.620523	0.895522	0.582078	4.28443	1.62942	4.3379	1.21633	1.75307	1.04488	1.92967	1.67665	3.28138	3.38032				MAX. Cond.	0.404028	1.90083	0.958637	1.01557	0.546592	0.931424	0.430396	0.640764	1.65601	0.337268	0.600417	0.015	0.445794	0.0978261	1.28955	1.46583	1.55305	1.00969
	MCF-7 + BKCa - RFP + PAX																						MCF-7 + BKCa-DEC - RFP + PAX
Voltage (mV)	Cell1	Cell2	Cell3	Cell4	Cell5	Cell6	Cell7	Cell8	Cell9	Cell10	Cell11	Cell12	Cell13	Cell14								Voltage (mV)	Cell1	Cell2	Cell3	Cell4	Cell5	Cell6	Cell7	Cell8	Cell9	Cell10	Cell11	Cell12	Cell13	Cell14	Cell15	Cell16	Cell17	Cell18	Cell19	Cell20	Cell21
-100	0.0123948	0.00354045	0.00178143	0.0107555	-0.00131864	0.00987601	0.0555892	0.00026896	0.000378957	0.000535938	0.000244845	0.00372617	-0.00208456	0.00925238								-100	0.0185908	0.00323775	0.0169034	0.0242117	0.00217638	0.00237801	0.0409384	0.0185908	0.00323775	0.0169034	0.0242117	0.00217703	0.00237801	0.0409384	-0.000594884	0.00265672	0.0112045	0.000722222	-0.003618	0.00298058	-0.0073589
-80	0.00798745	0.00375405	0.00363234	0.00446456	0.000354602	0.011464	0.0172675	0.000652854	0.00102421	0.000804688	0.00742268	0.00285095	0.00299902	0.00505409								-80	0.0202037	0.00207288	0.0134943	0.0113363	0.00228401	0.00187325	0.012313	0.0202037	0.00207288	0.0134943	0.0113363	0.00228469	0.00187325	0.0177925	0.00121356	0.00163433	0.00656396	0.000407071	-0.000758494	0.00152427	0.00172747
-60	0.0132078	0.00307443	0.00358181	0.00582267	0.00184841	0.00593866	0.00304453	0.000961689	0.00261639	0.00126563	0.0123196	0.00163778	0.00605703	0.00274503								-60	0.0232598	0.00158901	0.0116004	0.0139264	0.00201495	0.00145261	0.030074	0.0232598	0.00183393	0.0125	0.0139264	0.00235646	0.00254066	0.0305464	0.00145152	0.00152985	0.0080112	0.000350505	0.00365473	0.00235922	0.00486436
-40	0.0137641	0.00376052	0.00508528	0.00914767	0.00354215	0.00467696	0.0195395	0.0019312	0.00785847	0.0030625	0.031701	0.00306759	0.0132743	0.00850961								-40	0.0213922	0.00261649	0.0192708	0.026464	0.00310314	0.0023051	0.0177925	0.0213922	0.00366189	0.0227273	0.0297673	0.00569976	0.0068424	0.0177925	0.00195122	0.00158209	0.015873	0.00126263	0.0102847	0.00746602	0.00997817
-20	0.0026815	0.00500971	0.00607075	0.018108	0.00433101	0.00804873	0.041654	0.00329945	0.0138734	0.00501563	0.0463402	0.00405546	0.020059	0.0107864								-20	0.0217317	0.00442055	0.0306345	0.0465465	0.0041435	0.00351654	0.0273973	0.0217317	0.00657109	0.0306345	0.0548048	0.00825359	0.0114414	0.0277122	0.00226056	0.00236567	0.022409	0.00198485	0.0157025	0.0135922	0.0178983
0	0.0141777	0.00776699	0.0111813	0.0327818	0.0053751	0.00928867	0.071342	0.00418296	0.0193669	0.00751562	0.0685567	0.00461872	0.0253687	0.0156628								0	0.0252971	0.00818399	0.0492424	0.0750751	0.00675635	0.00802019	0.0530625	0.0252971	0.00818399	0.0492424	0.0810811	0.0122608	0.0177229	0.0530625	0.00176086	0.00364925	0.0263305	0.00277273	0.023416	0.0237864	0.0330527
20	0.0336614	0.0115858	0.0157296	0.0454262	0.0070379	0.011638	0.132384	0.0054183	0.0219739	0.00953125	0.0881443	0.00643847	0.0490659	0.0190538								20	0.0234295	0.0143369	0.0748106	0.108859	0.0133333	0.0134044	0.0881751	0.0234295	0.0143369	0.0748106	0.108859	0.0174641	0.0228267	0.0881751	0.00187983	0.00235821	0.0329599	0.00331818	0.0313131	0.0349515	0.0430309
40	0.0526316	0.018123	0.0243209	0.058695	0.0102475	0.022841	0.190851	0.00666927	0.0271881	0.0124219	0.0974227	0.0210572	0.100295	0.0339093								40	0.0248727	0.0236559	0.113163	0.138514	0.0255306	0.0214246	0.124075	0.0248727	0.0236559	0.113163	0.138514	0.0255383	0.0275939	0.124547	0.00240333	0.0056791	0.0373483	0.004	0.0456382	0.0503883	0.0767072
60	0.0957067	0.0265372	0.0371447	0.0655635	0.0141918	0.0517729	0.262042	0.00759187	0.0329609	0.015	0.116495	0.0433276	0.163225	0.0442435								60	0.0282683	0.0360215	0.162405	0.18018	0.0354559	0.0372406	0.170052	0.0282683	0.0360215	0.163826	0.18018	0.0354665	0.0373528	0.170052	0.00553242	0.0109701	0.0398693	0.00565657	0.0606061	0.0725243	0.116932
80	0.122236	0.0388997	0.0476943	0.0760225	0.01628	0.0987601	0.336262	0.0089914	0.0391061	0.0182031	0.135567	0.0675043	0.230088	0.0432747								80	0.0269949	0.0525687	0.221591	0.220345	0.0449028	0.0566461	0.255078	0.0291171	0.0525687	0.222538	0.220345	0.0449163	0.0566461	0.255078	0.00705532	0.0181343	0.0575163	0.0130808	0.0808081	0.0970874	0.193015
100	0.195407	0.0570874	0.060897	0.0942866	0.0193349	0.150533	0.431687	0.00961689	0.0475791	0.0217187	0.147423	0.0961872	0.303835	0.0663653								100	0.0286078	0.0734767	0.289773	0.322447	0.0572795	0.0762759	0.327507	0.039219	0.0734767	0.29214	0.322447	0.0575957	0.0762759	0.330657	0.000145152	0.0265672	0.0727358	0.0229798	0.100092	0.117476	0.255067
120	0.265297	0.0809061	0.0777006	0.128005	0.021075	0.208614	0.510451	0.0107115	0.052514	0.0246094	0.173196	0.136915	0.377581	0.0996286								120	0.0278438	0.0943847	0.366477	0.435435	0.0699552	0.101514	0.445599	0.0410866	0.0943847	0.366477	0.435435	0.0699761	0.101514	0.445599	0.00722189	0.0328358	0.0912232	0.0242424	0.12213	0.121359	0.314936
140	0.348025	0.101618	0.0865445	0.159226	0.0238979	0.221884	0.583157	0.0124316	0.0581006	0.0278906	0.197938	0.189775	0.412979	0.125949								140	0.0279287	0.119474	0.445549	0.431682	0.0831091	0.149187	0.481814	0.0528862	0.120072	0.448864	0.431682	0.083134	0.149187	0.481814	0.0102439	0.0467164	0.111111	0.0106566	0.142332	0.124272	0.303711
160	0.420767	0.128155	0.111181	0.192007	0.0258314	0.287144	0.658891	0.0400313	0.0590317	0.0332031	0.292268	0.233969	0.438545	0.125949								160	0.0278438	0.14098	0.535038	0.465465	0.0950673	0.228267	0.661313	0.0437182	0.14098	0.535038	0.465465	0.0950957	0.228267	0.669186	0.0270077	0.0666418	0.131653	0.0136869	0.178145	0.135922	0.318054
180	0.503495	0.160518	0.130133	0.231033	0.029621	0.339352	0.71645	0.0752932	0.0690875	0.0369531	0.246392	0.306759	0.520157	0.133053								180	0.0291171	0.168459	0.625	0.503003	0.110613	0.233875	0.784128	0.0471986	0.168459	0.625	0.503003	0.110646	0.233875	0.784128	0.0370018	0.112687	0.154995	0.0177778	0.216713	0.15534	0.408481
MAX. Cond.	0.503495	0.160518	0.130133	0.231033	0.029621	0.339352	0.71645	0.0752932	0.0690875	0.0369531	0.246392	0.306759	0.520157	0.133053								MAX. Cond.	0.0291171	0.168459	0.625	0.503003	0.110613	0.233875	0.784128	0.0471986	0.168459	0.625	0.503003	0.110646	0.233875	0.784128	0.0370018	0.112687	0.154995	0.0177778	0.216713	0.15534	0.408481
	MCF-7 + BKCa - RFP + IBTX																						MCF-7 + BKCa-DEC - RFP + IBTX
Voltage (mV)	Cell1	Cell2	Cell3	Cell4	Cell5	Cell6	Cell7	Cell8	Cell9	Cell10	Cell11	Cell12	Cell13	Cell14	Cell15	Cell16	Cell17	Cell18	Cell19			Voltage (mV)	Cell1	Cell2	Cell3	Cell4	Cell5	Cell6	Cell7	Cell8	Cell9	Cell10	Cell11	Cell12	Cell13	Cell14	Cell15	Cell16	Cell17	Cell18
-100	0.0123948	0.00354045	0.00178143	0.0107555	-0.00131864	0.00987601	0.0555892	0.0165791	0.0103102	-0.00372881	0.00507402	0.00307225	0.0157855	0.0009688	0.0146596	0.0019531	0.00587748	0.00271194	0.00508398			-100	-0.0120522	-0.0070497	-0.00130678	0.00607965	0.0403226	0.00451031	0.00918004	0.014735	0.0122694	-0.00172009	0.00699422	0.00194006	0.00564063	0.0383348	0.00889328	0.00055142	0.00984496	0.00350347
-80	0.00798745	0.00375405	0.00379027	0.00446456	0.0003546	0.011464	0.0172675	0.00784636	0.0118613	-0.00016949	0.00371793	0.00688724	0.0126888	0.00112753	0.012247	0.00146161	0.00385762	0.00221546	0.00229233			-80	0.00860395	0.00070497	0.0008687	0.00647169	0.0211346	0.00347938	0.00793226	0.0161328	0.00539668	9.4573e-05	0.00456647	0.00356467	0.00345313	0.0137766	0.00434783	0.00148359	0.00796512	0.00112051
-60	0.0132078	0.00307443	0.00358181	0.0104277	0.00246713	0.00593866	0.00569524	0.00216349	0.00967153	0.00267927	0.0031077	0.00289669	0.0135196	0.00130816	0.00615416	0.00154835	0.0035596	0.00264637	0.00249206			-60	0.0206562	0.0111385	0.00296204	0.00518979	0.0259455	0.00453608	0.0124777	0.0135119	0.00027491	0.00167248	0.00287861	0.00681388	0.00242188	0.00956873	0.00115283	0.00259956	0.0117248	0.00119299
-40	0.0137641	0.00376052	0.00508528	0.0252888	0.00668987	0.00467696	0.0230233	-0.00191399	0.0207117	0.00847458	0.00666742	0.0012154	0.0151813	0.00148878	0.00443672	0.00122711	0.00559603	0.00374707	0.00562869			-40	0.0309006	0.030349	0.00856254	0.0207218	0.0325361	0.0078866	0.0293226	0.0105416	-0.00203875	0.00311647	0.00242775	0.012082	0.00325	0.0166217	-0.00040646	0.00370678	0.0161628	0.00066445
-20	0.00302382	0.00500971	0.00682249	0.0408992	0.0116009	0.00804873	0.0434717	-0.00699278	0.0347628	0.0142764	0.00934569	0.00149899	0.0174471	0.00264915	0.00985484	0.00132027	0.0100993	0.00529274	0.0118021			-20	0.027151	0.058865	0.0113628	0.0260112	0.0143771	0.0139948	0.0502674	0.0139196	-0.00367159	0.00428435	0.00171098	0.0195584	0.00453125	0.0289009	-0.00136364	0.00564551	0.0224806	0.00080942
0	0.0141777	0.00776699	0.0111813	0.0630659	0.016628	0.00928867	0.071342	-0.00485883	0.0494525	0.01897	0.0119787	0.00528697	0.0207704	0.00310345	0.0143325	0.00121426	0.0168874	0.00604215	0.0216977			0	0.0291597	0.115968	0.00769135	0.0322962	-0.00154894	0.0186082	0.0660428	0.0151427	-0.00281365	0.00590289	0.00243931	0.0288644	0.00882813	0.0438754	0.00071805	0.00595186	0.0327519	0.00075204
20	0.0336614	0.0115858	0.0159191	0.075242	0.0226218	0.011638	0.132384	-0.00042022	0.067427	0.0241851	0.0117527	0.00681972	0.0255287	0.00430213	0.0206502	0.00098619	0.0284768	0.00590164	0.0349523			20	0.0204218	0.140289	0.0120971	0.0384567	0.0656285	0.0244588	0.0868984	0.019569	0.00062177	0.00764837	0.00945665	0.0414827	0.0164063	0.0619946	0.0108696	0.00761488	0.0542636	0.00092721
40	0.0526316	0.018123	0.0245104	0.0922573	0.0303944	0.022841	0.192366	0.00400525	0.079927	0.0294655	0.0172901	-0.00177583	0.0261329	0.00580186	0.0306686	0.00158047	0.0406457	0.0101171	0.0585565			40	0.0793438	0.161791	0.0158058	0.044804	0.108732	0.028866	0.112299	0.0288876	0.00690959	0.0097112	0.0250867	0.0607256	0.0285938	0.0871518	0.0251647	0.00844639	0.071124	0.00144669
60	0.0957067	0.0278317	0.0385344	0.107712	0.0370456	0.0517729	0.263557	0.0377544	0.0912409	0.0342894	0.0435077	0.0140446	0.0267372	0.00527094	0.0435494	0.00175072	0.0599338	0.0112881	0.0935089			60	0.075996	0.17166	0.0266335	0.369633	0.0870412	0.0425258	0.12656	0.0476412	0.0129151	0.0124088	0.047052	0.0828076	0.0508594	0.11171	0.0428854	0.00835886	0.0877907	0.00305044
80	0.122236	0.0418123	0.0476943	0.118639	0.0429234	0.0987601	0.336262	0.0627052	0.107664	0.0391134	0.0785399	0.0188386	0.0410876	0.00727969	0.0619505	0.00242853	0.0778974	0.0134895	0.127553			80	0.177101	0.204441	0.0379589	0.0821406	0.0344828	0.0613402	0.150624	0.06523	0.0298893	0.0145985	0.0752601	0.10347	0.08125	0.155735	0.0625165	0.0105908	0.107946	0.00588946
100	0.195407	0.0599353	0.0612761	0.135342	0.0487239	0.150533	0.431687	0.0554826	0.125912	0.0446545	0.120918	0.0396354	0.0365559	0.0076081	0.0852586	0.00362994	0.0968543	0.0163934	0.154335			100	0.243723	0.223828	0.0500311	0.0759179	0.109288	0.0809278	0.174688	0.0955154	0.0478782	0.0170422	0.0936416	0.129811	0.113281	0.205151	0.0909091	0.0108534	0.155426	0.0110843
120	0.265297	0.0854369	0.0777006	0.146113	0.0541377	0.208614	0.510451	0.0521996	0.136861	0.0488918	0.16386	0.0657664	0.0490181	0.0111658	0.111225	0.00510761	0.116722	0.0153162	0.189741			120	0.201875	0.242157	0.0708152	0.417548	0.0653504	0.107216	0.188948	0.0786255	0.0668819	0.0195494	0.0863584	0.15205	0.147656	0.256065	0.123188	0.012779	0.238372	0.0172757
140	0.348025	0.107443	0.0865445	0.159226	0.0599381	0.221884	0.583157	0.0682863	0.155109	0.0567797	0.205673	0.0958812	0.046148	0.0100711	0.139031	0.00764536	0.126656	0.013911	0.22424			140	0.287914	0.274233	0.131923	0.326696	0.101224	0.119588	0.210339	0.150844	0.0922509	0.0216439	0.0796532	0.182965	0.1875	0.321953	0.157444	0.01593	0.348837	0.0220477
160	0.420767	0.138511	0.111181	0.192007	0.0653519	0.287144	0.658891	0.0518713	0.167883	0.0649283	0.242965	0.111411	0.0537009	0.0125889	0.17154	0.00941214	0.144868	0.015363	0.265093			160	0.395045	0.29362	0.168015	0.127567	0.170467	0.126289	0.249554	0.188701	0.114391	0.026436	0.10659	0.225552	0.217188	0.401318	0.20751	0.0217943	0.410853	0.0288734
180	0.504921	0.168285	0.134555	0.234155	0.0711524	0.339352	0.71645	0.00426789	0.185219	0.0646024	0.297209	0.118163	0.0497734	0.0195402	0.208546	0.0106971	0.166391	0.0155035	0.315025			180	0.448611	0.316884	0.170504	0.301805	0.229143	0.144588	0.287879	0.239371	0.150369	0.0336401	0.115607	0.266562	0.247656	0.468703	0.29249	0.0253392	0.48062	0.0302024
MAX. Cond.	0.504921	0.168285	0.134555	0.234155	0.0711524	0.339352	0.71645	0.00426789	0.185219	0.0646024	0.297209	0.118163	0.0497734	0.0195402	0.208546	0.0106971	0.166391	0.0155035	0.315025			MAX. Cond.	0.448611	0.316884	0.170504	0.301805	0.229143	0.144588	0.287879	0.239371	0.150369	0.0336401	0.115607	0.266562	0.247656	0.468703	0.29249	0.0253392	0.48062	0.0302024
