# Supplementary material for: mitoBKCa is functionally expressed in murine and human breast cancer cells and potentially contributes to metabolic reprogramming
Source: eLife. 2024 May 29;12:RP92511. doi: 10.7554/eLife.92511 (PMC11136494; doi:10.7554/eLife.92511)
Supplement: Figure 2—figure supplement 1—source data 1. [file elife-92511-fig2-figsupp1-data1.xlsx]

## Sheet: Fig.S2A
MMTV-PyMT WT + PAX					MMTV-PyMT BK-KO + PAX
Time (min)	Average	SD	N (cells)		Average	SD	N (cells)
0	0.243471	0.0306835	300		0.245778	0.0483838	300
0.0501217	0.244203	0.0317649	300		0.246309	0.0481594	300
0.100088	0.244212	0.0315422	300		0.246507	0.0479522	300
0.150048	0.244375	0.0310761	300		0.24714	0.0489083	300
0.200153	0.243988	0.0309026	300		0.246874	0.0481904	300
0.250078	0.243857	0.0308011	300		0.246997	0.0470202	300
0.300157	0.243474	0.0305277	300		0.246515	0.0452719	300
0.350123	0.243451	0.0305399	300		0.246174	0.0439007	300
0.400072	0.243237	0.0301937	300		0.246039	0.0425538	300
0.450043	0.243103	0.0300359	300		0.246089	0.041567	300
0.500152	0.243384	0.0298745	300		0.245588	0.0411769	300
0.550037	0.244298	0.0297729	300		0.245185	0.0407692	300
0.600183	0.245915	0.032863	300		0.244969	0.0404116	300
0.650123	0.246391	0.032902	300		0.244304	0.0401772	300
0.700082	0.246889	0.0328226	300		0.24397	0.0400641	300
0.75008	0.246816	0.032354	300		0.243483	0.0401755	300
0.800122	0.246636	0.0319738	300		0.243281	0.0401147	300
0.850065	0.246463	0.0311776	300		0.243156	0.0401127	300
0.900163	0.246085	0.030702	300		0.242994	0.0401795	300
0.950037	0.246062	0.0299234	300		0.243042	0.0400961	300
1.00017	0.245653	0.0294002	300		0.242885	0.0401306	300
1.05016	0.245752	0.0290628	300		0.242925	0.0403288	300
1.10013	0.245455	0.0287894	300		0.242921	0.0406166	300
1.15008	0.245503	0.0284134	300		0.243116	0.0409979	300
1.20015	0.245647	0.0284253	300		0.243396	0.041566	300
1.25016	0.245916	0.0284626	300		0.243093	0.0423109	300
1.30004	0.245823	0.0285643	300		0.243406	0.042211	300
1.35003	0.245203	0.028294	300		0.243162	0.0421899	300
1.40004	0.244597	0.0284546	300		0.243121	0.0419812	300
1.45009	0.244472	0.0284819	300		0.242986	0.0418514	300
1.50004	0.244209	0.0284366	300		0.242888	0.0414451	300
1.55017	0.244306	0.0286493	300		0.242621	0.0412467	300
1.60017	0.244582	0.0284333	300		0.242659	0.0410509	300
1.65015	0.245633	0.0283842	300		0.242357	0.0411735	300
1.70017	0.246415	0.0286435	300		0.242342	0.0406937	300
1.75012	0.246792	0.0287707	300		0.242635	0.0406034	300
1.80003	0.247026	0.0290461	300		0.242693	0.0405379	300
1.85005	0.246736	0.0292878	300		0.242697	0.0405463	300
1.90018	0.246624	0.0294487	300		0.242758	0.0407385	300
1.95011	0.246886	0.0295778	300		0.243002	0.040705	300
2.00005	0.247438	0.0294686	300		0.242901	0.0409303	300
2.05016	0.246891	0.0289675	300		0.243263	0.0416381	300
2.10013	0.246151	0.0290566	300		0.243848	0.0433114	300
2.15019	0.245207	0.0288697	300		0.244264	0.0443619	300
2.20017	0.244985	0.0286237	300		0.244738	0.0438495	300
2.25005	0.244775	0.0288371	300		0.244815	0.0431318	300
2.30008	0.244429	0.0291911	300		0.244663	0.0426423	300
2.35011	0.243959	0.0291474	300		0.244519	0.0421652	300
2.40016	0.243809	0.0288143	300		0.244716	0.0415807	300
2.45018	0.243894	0.0290482	300		0.244778	0.0413504	300
2.50011	0.243875	0.0289744	300		0.244698	0.0411233	300
2.5501	0.243411	0.029278	300		0.244629	0.040964	300
2.60015	0.243452	0.0291384	300		0.244444	0.0408314	300
2.65004	0.243126	0.0293022	300		0.244095	0.0407601	300
2.70015	0.243388	0.0294561	300		0.243997	0.040661	300
2.75019	0.243846	0.0293483	300		0.243915	0.0410668	300
2.80017	0.243671	0.0296197	300		0.244077	0.0416179	300
2.85008	0.244045	0.0302904	300		0.244029	0.0418756	300
2.90003	0.244129	0.0306416	300		0.244097	0.0417678	300
2.95019	0.244316	0.0303462	300		0.243866	0.0413511	300
3.00008	0.244194	0.0302201	300		0.243946	0.0411843	300
3.05006	0.244139	0.0299162	300		0.244152	0.0407522	300
3.10016	0.244046	0.030068	300		0.244196	0.040587	300
3.15006	0.244085	0.0303069	300		0.244628	0.0408189	300
3.20011	0.244323	0.0306621	300		0.245277	0.0413347	300
3.25004	0.244794	0.0306496	300		0.245584	0.0416358	300
3.30004	0.244831	0.0308273	300		0.245622	0.0409453	300
3.35009	0.244686	0.0310861	300		0.24545	0.0401212	300
3.40017	0.244615	0.0311034	300		0.245452	0.039707	300
3.45011	0.244481	0.0311693	300		0.245341	0.039462	300
3.50014	0.24444	0.0309881	300		0.245367	0.0394576	300
3.55009	0.244258	0.030658	300		0.245357	0.0393987	300
3.60017	0.244285	0.0304488	300		0.245467	0.0396265	300
3.65013	0.244029	0.0301183	300		0.245439	0.0396437	300
3.70008	0.244311	0.0302701	300		0.245359	0.0394718	300
3.75003	0.243929	0.030569	300		0.245199	0.0394041	300
3.80004	0.244064	0.0303619	300		0.245301	0.0392109	300
3.85008	0.244103	0.0307048	300		0.245396	0.0390434	300
3.90017	0.243828	0.0306681	300		0.245695	0.0389084	300
3.95014	0.243911	0.0304258	300		0.245416	0.0390802	300
4.00013	0.244221	0.0302094	300		0.245063	0.0392532	300
4.05012	0.243997	0.0300478	300		0.24518	0.039574	300
4.10013	0.244405	0.0297222	300		0.244759	0.0405917	300
4.15018	0.245025	0.0295827	300		0.245071	0.0416877	300
4.20015	0.24638	0.0299764	300		0.244959	0.0424206	300
4.25009	0.247191	0.0297846	300		0.244889	0.0423786	300
4.30012	0.247662	0.0297268	300		0.244696	0.0422956	300
4.35015	0.247502	0.0293402	300		0.24485	0.0423334	300
4.40016	0.247289	0.0290485	300		0.244739	0.0421473	300
4.45018	0.246813	0.0288272	300		0.244578	0.0419353	300
4.50009	0.246223	0.0285443	300		0.244308	0.041331	300
4.55016	0.245967	0.0286736	300		0.24447	0.0409464	300
4.60009	0.245893	0.0287442	300		0.244445	0.0406712	300
4.65003	0.245553	0.028853	300		0.24396	0.0404411	300
4.70011	0.245195	0.0288874	300		0.24404	0.0403749	300
4.75017	0.245005	0.0290902	300		0.243998	0.0405229	300
4.80006	0.24511	0.0292831	300		0.243953	0.0405813	300
4.85007	0.245137	0.0296081	300		0.244165	0.0409553	300
4.90003	0.245289	0.0308586	300		0.244347	0.0412856	300
4.95011	0.245595	0.0315217	300		0.244789	0.042345	300
5.00014	0.24542	0.0316783	300		0.245514	0.0435771	300
5.05013	0.245675	0.032032	300		0.245702	0.0445851	300
5.10016	0.245682	0.0321583	300		0.24598	0.0452517	300
5.15003	0.245903	0.032452	300		0.246082	0.0462193	300
5.20019	0.245925	0.0329	300		0.246461	0.0471086	300
5.25017	0.264206	0.0765664	300		0.246402	0.0474767	300
5.30011	0.361256	0.316103	300		0.246584	0.0475664	300
5.35012	0.357133	0.302349	300		0.246618	0.0475178	300
5.40004	0.361328	0.298642	300		0.246577	0.0477102	300
5.45005	0.385035	0.304109	300		0.265518	0.0826872	300
5.50016	0.492605	0.380759	300		0.350831	0.200027	300
5.55007	0.521468	0.389284	300		0.418686	0.277838	300
5.60008	0.53529	0.385653	300		0.472187	0.295647	300
5.65012	0.694818	0.361765	300		0.50036	0.27218	300
5.7001	0.825591	0.32791	300		0.56359	0.235751	300
5.75016	0.806573	0.314937	300		0.585916	0.22615	300
5.80007	0.785702	0.306616	300		0.580215	0.217976	300
5.85014	0.77023	0.302315	300		0.579711	0.210948	300
5.90006	0.760843	0.299506	300		0.582254	0.207182	300
5.95007	0.75449	0.298236	300		0.587548	0.20227	300
6.00009	0.748868	0.298565	300		0.590063	0.198052	300
6.05015	0.743131	0.298339	300		0.589939	0.194737	300
6.10015	0.736659	0.298833	300		0.587467	0.193027	300
6.15003	0.731142	0.300699	300		0.581426	0.192003	300
6.20006	0.724924	0.301543	300		0.576923	0.191578	300
6.25013	0.717197	0.303698	300		0.57339	0.192709	300
6.30018	0.710705	0.306102	300		0.569236	0.193424	300
6.35008	0.705796	0.307372	300		0.564462	0.192474	300
6.40003	0.701059	0.309174	300		0.55853	0.191278	300
6.45009	0.696274	0.311127	300		0.552639	0.188874	300
6.50016	0.690724	0.313119	300		0.546347	0.186604	300
6.55008	0.686404	0.315443	300		0.540374	0.185348	300
6.60011	0.681816	0.316086	300		0.534559	0.184282	300
6.65007	0.678779	0.317504	300		0.530149	0.18367	300
6.70012	0.676751	0.318678	300		0.526471	0.183111	300
6.75009	0.672974	0.318721	300		0.52177	0.181994	300
6.80013	0.670798	0.319837	300		0.516987	0.180416	300
6.85013	0.66881	0.322326	300		0.512396	0.178454	300
6.90004	0.665454	0.321764	300		0.508532	0.1766	300
6.95005	0.662624	0.323369	300		0.504614	0.174952	300
7.00009	0.659251	0.324608	300		0.500733	0.174183	300
7.05008	0.65623	0.32583	300		0.496497	0.172917	300
7.10014	0.653541	0.327265	300		0.49252	0.171343	300
7.15018	0.651	0.328467	300		0.488565	0.169819	300
7.20017	0.647377	0.329494	300		0.48424	0.168324	300
7.25019	0.643706	0.330602	300		0.480168	0.167229	300
7.30007	0.641131	0.332516	300		0.476296	0.165634	300
7.35012	0.638257	0.334055	300		0.472321	0.164325	300
7.40015	0.635704	0.334867	300		0.470014	0.164961	300
7.45018	0.633576	0.335891	300		0.465616	0.163276	300
7.50009	0.631945	0.336469	300		0.461246	0.160709	300
7.55019	0.628958	0.33728	300		0.458795	0.161408	300
7.60016	0.626174	0.33784	300		0.455354	0.160479	300
7.65011	0.62275	0.338552	300		0.451247	0.158863	300
7.70009	0.619247	0.339022	300		0.448281	0.157339	300
7.75009	0.617424	0.341054	300		0.445678	0.157263	300
7.80014	0.61394	0.341536	300		0.444143	0.15708	300
7.85005	0.611349	0.342845	300		0.440647	0.155604	300
7.90006	0.608182	0.3429	300		0.438418	0.155042	300
7.95003	0.606022	0.343303	300		0.436182	0.154676	300
8.00015	0.603508	0.343505	300		0.433474	0.153968	300
8.0501	0.602153	0.34411	300		0.431147	0.153304	300
8.10005	0.599819	0.344134	300		0.427867	0.152071	300
8.15015	0.598308	0.345272	300		0.424827	0.150719	300
8.20017	0.59514	0.344572	300		0.422778	0.151286	300
8.25014	0.592993	0.345177	300		0.419926	0.150533	300
8.30005	0.591655	0.34586	300		0.41737	0.148961	300
8.3501	0.589284	0.345465	300		0.414623	0.148391	300
8.40014	0.588187	0.345784	300		0.412559	0.147056	300
8.45019	0.586416	0.346067	300		0.410357	0.147567	300
8.50016	0.585826	0.345342	300		0.40869	0.147669	300
8.55007	0.583795	0.344929	300		0.406716	0.146675	300
8.60003	0.581824	0.345102	300		0.403939	0.145366	300
8.65005	0.580091	0.344964	300		0.402384	0.145148	300
8.70007	0.577481	0.344684	300		0.400373	0.144027	300
8.75016	0.575409	0.34429	300		0.39858	0.143995	300
8.80011	0.573731	0.344516	300		0.396379	0.143695	300
8.85008	0.572073	0.344486	300		0.393629	0.142768	300
8.90006	0.570231	0.343955	300		0.391843	0.142354	300
8.95008	0.568488	0.34356	300		0.390197	0.142869	300
9.00003	0.567051	0.343783	300		0.388025	0.141792	300
9.05019	0.565504	0.342992	300		0.385873	0.141511	300
9.10019	0.564643	0.343122	300		0.384107	0.142113	300
9.15017	0.563988	0.342623	300		0.381911	0.140687	300
9.20025	0.563151	0.342126	300		0.379682	0.139714	300
9.25012	0.562224	0.341293	300		0.378059	0.140204	300
9.30016	0.560573	0.340301	300		0.375645	0.138895	300
9.35017	0.55939	0.339927	300		0.374171	0.139023	300
9.40009	0.558	0.339518	300		0.372343	0.139044	300
9.45014	0.557056	0.339487	300		0.370475	0.13811	300
9.50011	0.5559	0.339294	300		0.36833	0.137413	300
9.55023	0.555224	0.339639	300		0.36612	0.136361	300
9.6002	0.552861	0.337971	300		0.364511	0.136562	300
9.65012	0.551911	0.337677	300		0.362551	0.136009	300
9.70016	0.551254	0.337666	300		0.360391	0.134719	300
9.75015	0.549848	0.336213	300		0.35792	0.13409	300
9.80006	0.549733	0.336249	300		0.356679	0.134342	300
9.85003	0.549256	0.33607	300		0.355161	0.134741	300
9.90008	0.548384	0.335332	300		0.352495	0.133249	300
9.95017	0.547304	0.334694	300		0.350303	0.132081	300
10	0.546445	0.333951	300		0.349951	0.13316	300
10.0501	0.545549	0.333759	300		0.348739	0.132524	300
10.1002	0.544736	0.332424	300		0.347691	0.132103	300
10.1501	0.474864	0.285613	300		0.34732	0.132623	300
10.2	0.475025	0.285588	300		0.346358	0.132012	300
10.2501	0.474268	0.285015	300		0.345323	0.130832	300
10.3001	0.474465	0.286071	300		0.34435	0.129535	300
10.3501	0.474386	0.285747	300		0.343425	0.128686	300
10.4001	0.474202	0.284955	300		0.3426	0.127238	300
10.4501	0.474061	0.286145	300		0.341312	0.125875	300
10.5001	0.387122	0.235991	300		0.340514	0.125907	300
10.5501	0.385284	0.234633	300		0.339484	0.125038	300
10.6	0.383509	0.232727	300		0.337253	0.123249	300
10.6501	0.382883	0.232971	300		0.335368	0.121668	300
10.7002	0.38138	0.231676	300		0.332941	0.119229	300
10.75	0.379581	0.229	300		0.330887	0.116396	300
10.8002	0.376607	0.225017	300		0.328152	0.112873	300
10.8501	0.374299	0.220674	300		0.325379	0.109543	300
10.9002	0.371192	0.216652	300		0.322117	0.106076	300
10.9502	0.367758	0.211779	300		0.318101	0.102023	300
11.0001	0.363539	0.206174	300		0.314519	0.0985286	300
11.0501	0.359955	0.199942	300		0.31045	0.0949736	300
11.1002	0.354753	0.192994	300		0.307011	0.0917764	300
11.15	0.35038	0.187143	300		0.303513	0.0882583	300
11.2001	0.346567	0.181611	300		0.299283	0.0851916	300
11.25	0.344208	0.177655	300		0.295442	0.0821331	300
11.3001	0.340493	0.172966	300		0.29172	0.0792414	300
11.35	0.337529	0.168185	300		0.287839	0.0764468	300
11.4002	0.335059	0.164231	300		0.284567	0.0738301	300
11.4502	0.332438	0.159914	300		0.28119	0.0714288	300
11.5001	0.33074	0.156568	300		0.278207	0.0690781	300
11.5502	0.328104	0.152502	300		0.276015	0.0674276	300
11.6001	0.325155	0.148555	300		0.274063	0.0658119	300
11.6501	0.322259	0.144298	300		0.272218	0.0642984	300
11.7002	0.319137	0.140509	300		0.271076	0.0633013	300
11.7501	0.316018	0.137181	300		0.270071	0.0622083	300
11.8001	0.313229	0.133848	300		0.268895	0.0613517	300
11.85	0.310002	0.130326	300		0.268176	0.0605499	300
11.9001	0.306786	0.127239	300		0.267273	0.0598868	300
11.9501	0.304085	0.124302	300		0.266522	0.0595167	300
12.0001	0.301772	0.121355	300		0.26606	0.0591785	300
12.0501	0.30007	0.117886	300		0.265172	0.0588342	300
12.1002	0.298049	0.115162	300		0.264392	0.0581224	300
12.1502	0.296611	0.112674	300		0.263678	0.0573664	300
12.2002	0.29529	0.110453	300		0.262641	0.0569303	300
12.2501	0.293834	0.10821	300		0.262491	0.0569588	300
12.3001	0.292829	0.105956	300		0.261887	0.0567049	300
12.3501	0.292042	0.10424	300		0.261716	0.0562826	300
12.4001	0.290935	0.101911	300		0.261265	0.0561881	300
12.4501	0.290811	0.100776	300		0.261065	0.0558978	300
12.5002	0.289826	0.0991259	300		0.261001	0.055964	300
12.5501	0.289499	0.0980703	300		0.260856	0.0559547	300
12.6001	0.289358	0.0971458	300		0.260381	0.05596	300
12.6501	0.288995	0.0951419	300		0.260267	0.0559086	300
12.7001	0.289565	0.0953333	300		0.260036	0.0555316	300
12.7501	0.289542	0.0936291	300		0.259659	0.0550679	300
12.8001	0.289592	0.0923224	300		0.259341	0.0552615	300
12.8501	0.289504	0.0919912	300		0.25915	0.0551894	300
12.9002	0.289528	0.0908024	300		0.258802	0.0550405	300
12.9501	0.289311	0.0895988	300		0.25866	0.055274	300
13.0001	0.289453	0.088799	300		0.258386	0.0555797	300
13.0501	0.289013	0.0875408	300		0.258358	0.0557953	300
13.1002	0.288995	0.0867975	300		0.258209	0.0561996	300
13.1501	0.288804	0.0861343	300		0.258029	0.0560794	300
13.2002	0.288639	0.0854847	300		0.258079	0.055982	300
13.2502	0.288651	0.0848204	300		0.258025	0.0558789	300
13.3001	0.288332	0.0843468	300		0.25813	0.0557943	300
13.3502	0.288598	0.0841067	300		0.257789	0.0552996	300
13.4	0.288763	0.0840698	300		0.257387	0.0552302	300
13.4501	0.289068	0.0840344	300		0.257047	0.0550827	300
13.5001	0.289013	0.0836437	300		0.256979	0.0551213	300
13.5501	0.288806	0.083074	300		0.256532	0.0553651	300
13.6001	0.288556	0.082393	300		0.256428	0.05521	300
13.6502	0.289006	0.0823625	300		0.256871	0.0550293	300
13.7001	0.289204	0.0822523	300		0.256562	0.0545817	300
13.7501	0.28883	0.0816584	300		0.256554	0.0544017	300
13.8002	0.288663	0.080863	300		0.256503	0.0542748	300
13.8501	0.28879	0.0801031	300		0.256448	0.0540296	300
13.9	0.288083	0.0790606	300		0.256219	0.0537392	300
13.9501	0.287525	0.0782129	300		0.25603	0.053635	300
14.0001	0.287497	0.0777896	300		0.256047	0.0532939	300
14.05	0.2873	0.0773136	300		0.255656	0.0529818	300
14.1001	0.286983	0.0766818	300		0.255819	0.0526872	300
14.1501	0.286978	0.0766633	300		0.255707	0.0526526	300
14.2001	0.287415	0.076544	300		0.255539	0.05229	300
14.2501	0.287116	0.0762804	300		0.255472	0.0522014	300
14.3002	0.286834	0.075636	300		0.255395	0.0520269	300
14.3502	0.287403	0.0758141	300		0.254872	0.0519468	300
14.4001	0.287358	0.0747728	300		0.255007	0.0518197	300
14.4501	0.287478	0.0753652	300		0.254513	0.0515808	300
14.5001	0.287608	0.0752954	300		0.254347	0.0515594	300
14.5501	0.287879	0.0751969	300		0.254533	0.0512345	300
14.6	0.287766	0.0750959	300		0.254262	0.0507591	300
14.6502	0.287303	0.0743052	300		0.254345	0.0507599	300
14.7001	0.287079	0.0742615	300		0.254032	0.0504342	300
14.7502	0.287195	0.0738586	300		0.254036	0.0502148	300
14.8001	0.286981	0.0738975	300		0.25411	0.0501793	300
14.85	0.286902	0.0733479	300		0.25411	0.0498701	300
14.9001	0.286758	0.0727528	300		0.254115	0.0493646	300
14.95	0.286508	0.0724131	300		0.254297	0.0492248	300

## Sheet: Fig.S2B
MMTV-PyMT WT + IBTX					MMTV-PyMT BK-KO + IBTX
Time (min)	Average	SD	N (cells)		Average	SD	N (cells)
0	0.272891	0.0528429	318		0.239402	0.0152638	304
0.0501217	0.272238	0.0518699	318		0.239623	0.0150609	304
0.100088	0.271222	0.0502723	318		0.239626	0.0150576	304
0.150048	0.270685	0.0499253	318		0.239746	0.0149833	304
0.200153	0.270498	0.0485492	318		0.239542	0.0149607	304
0.250078	0.271265	0.0528217	318		0.239828	0.0146133	304
0.300157	0.271072	0.0567118	318		0.239937	0.0143407	304
0.350123	0.269557	0.0522866	318		0.240031	0.0140859	304
0.400072	0.269058	0.0507527	318		0.239822	0.0141976	304
0.450043	0.269146	0.0510578	318		0.239871	0.013739	304
0.500152	0.26924	0.0513152	318		0.239984	0.0138152	304
0.550037	0.268421	0.0500908	318		0.240243	0.0137623	304
0.600183	0.268128	0.0490859	318		0.240413	0.0134298	304
0.650123	0.267325	0.0484589	318		0.240694	0.0132055	304
0.700082	0.267677	0.0488835	318		0.240506	0.0134216	304
0.75008	0.268209	0.0503694	318		0.240752	0.0134416	304
0.800122	0.267828	0.050483	318		0.240833	0.0135031	304
0.850065	0.26736	0.0489336	318		0.241184	0.0134262	304
0.900163	0.267179	0.0482955	318		0.241464	0.013157	304
0.950037	0.267332	0.048326	318		0.24139	0.0133453	304
1.00017	0.267456	0.0486322	318		0.242048	0.0131173	304
1.05016	0.26703	0.0491777	318		0.241593	0.0129877	304
1.10013	0.266726	0.0469585	318		0.241504	0.0129306	304
1.15008	0.265979	0.0459902	318		0.241617	0.0124777	304
1.20015	0.266473	0.0471738	318		0.241854	0.0124997	304
1.25016	0.266552	0.0492098	318		0.24158	0.0123323	304
1.30004	0.267386	0.0525222	318		0.241527	0.0122736	304
1.35003	0.268478	0.0570269	318		0.241985	0.0122541	304
1.40004	0.268443	0.0590334	318		0.241854	0.0120982	304
1.45009	0.268375	0.0564429	318		0.241649	0.012171	304
1.50004	0.268084	0.0536282	318		0.241897	0.0121459	304
1.55017	0.267403	0.0524826	318		0.242004	0.0122001	304
1.60017	0.267042	0.0505622	318		0.241937	0.0120615	304
1.65015	0.266308	0.0494759	318		0.241952	0.0121025	304
1.70017	0.265559	0.0484023	318		0.242486	0.0119913	304
1.75012	0.266346	0.0496822	318		0.241964	0.0121127	304
1.80003	0.267102	0.050705	318		0.242206	0.0121541	304
1.85005	0.267562	0.0517544	318		0.242692	0.0122477	304
1.90018	0.268031	0.0520168	318		0.242566	0.0123607	304
1.95011	0.26795	0.0520013	318		0.242889	0.0128656	304
2.00005	0.267803	0.0510658	318		0.242689	0.0130633	304
2.05016	0.268387	0.051075	318		0.243124	0.0130157	304
2.10013	0.268321	0.0510791	318		0.242983	0.013389	304
2.15019	0.268039	0.0504594	318		0.243649	0.0136388	304
2.20017	0.268324	0.0504339	318		0.243414	0.0140991	304
2.25005	0.268332	0.0493049	318		0.243781	0.0158626	304
2.30008	0.268705	0.0499151	318		0.244206	0.0196991	304
2.35011	0.269291	0.0507585	318		0.244546	0.0208244	304
2.40016	0.268902	0.0493258	318		0.244767	0.0196854	304
2.45018	0.269253	0.0499394	318		0.244748	0.017797	304
2.50011	0.269411	0.050729	318		0.244364	0.0163022	304
2.5501	0.269897	0.0516819	318		0.244234	0.0151723	304
2.60015	0.271281	0.0561859	318		0.244055	0.014999	304
2.65004	0.271772	0.0603526	318		0.244418	0.0191568	304
2.70015	0.270331	0.0545674	318		0.244687	0.0255215	304
2.75019	0.269398	0.0516374	318		0.244504	0.0263901	304
2.80017	0.269282	0.0509481	318		0.2444	0.0237097	304
2.85008	0.269775	0.0516208	318		0.24425	0.0211871	304
2.90003	0.270104	0.0530902	318		0.243682	0.0188771	304
2.95019	0.270051	0.0536813	318		0.243577	0.0170682	304
3.00008	0.269981	0.052473	318		0.242974	0.015803	304
3.05006	0.270011	0.0531033	318		0.243021	0.0148479	304
3.10016	0.270574	0.0547176	318		0.242972	0.0144516	304
3.15006	0.27024	0.0540731	318		0.242943	0.0140618	304
3.20011	0.270523	0.0529736	318		0.242817	0.0139219	304
3.25004	0.271352	0.0545368	318		0.242607	0.0139392	304
3.30004	0.272112	0.0562842	318		0.242376	0.0139353	304
3.35009	0.272427	0.0563944	318		0.242884	0.0141133	304
3.40017	0.272671	0.0569939	318		0.242355	0.0146636	304
3.45011	0.273036	0.057367	318		0.243079	0.0144957	304
3.50014	0.273526	0.0580315	318		0.243183	0.0145015	304
3.55009	0.273755	0.0580842	318		0.242553	0.0148537	304
3.60017	0.273822	0.0580389	318		0.242926	0.0149878	304
3.65013	0.273265	0.0562586	318		0.243026	0.015748	304
3.70008	0.273119	0.055063	318		0.243508	0.0156873	304
3.75003	0.272992	0.0541983	318		0.243373	0.0159928	304
3.80004	0.272269	0.0531257	318		0.243521	0.0165921	304
3.85008	0.271857	0.052853	318		0.24391	0.0166071	304
3.90017	0.272108	0.0523262	318		0.243837	0.0158621	304
3.95014	0.272079	0.0521644	318		0.243221	0.0159117	304
4.00013	0.272374	0.0526937	318		0.242927	0.0155098	304
4.05012	0.272929	0.0533026	318		0.243143	0.0152139	304
4.10013	0.273256	0.0532751	318		0.242907	0.0151841	304
4.15018	0.273375	0.0527712	318		0.24307	0.0155758	304
4.20015	0.272939	0.0518691	318		0.243028	0.0157339	304
4.25009	0.272731	0.0511261	318		0.243047	0.0158645	304
4.30012	0.272594	0.0506004	318		0.242825	0.0163781	304
4.35015	0.272442	0.0499208	318		0.243718	0.0218158	304
4.40016	0.27219	0.0493857	318		0.24378	0.0261377	304
4.45018	0.271773	0.0484655	318		0.243371	0.025118	304
4.50009	0.271589	0.0480512	318		0.242817	0.024102	304
4.55016	0.271401	0.0483245	318		0.242555	0.0225768	304
4.60009	0.27143	0.0484773	318		0.242193	0.0197863	304
4.65003	0.271293	0.0488257	318		0.241939	0.0185844	304
4.70011	0.270985	0.0493229	318		0.242835	0.0193034	304
4.75017	0.270904	0.0497911	318		0.242738	0.0230934	304
4.80006	0.271291	0.0504824	318		0.242822	0.0245732	304
4.85007	0.272025	0.0518843	318		0.242221	0.0231805	304
4.90003	0.272674	0.0530682	318		0.242223	0.0207498	304
4.95011	0.273399	0.0557452	318		0.242004	0.0180309	304
5.00014	0.274047	0.0562216	318		0.241463	0.016254	304
5.05013	0.272933	0.0553777	318		0.241242	0.0153359	304
5.10016	0.27275	0.0548316	318		0.241441	0.0147588	304
5.15003	0.27262	0.0539036	318		0.24064	0.0141375	304
5.20019	0.273285	0.0540945	318		0.240939	0.0136837	304
5.25017	0.273241	0.0541951	318		0.240892	0.0135546	304
5.30011	0.273344	0.0544185	318		0.24092	0.0134952	304
5.35012	0.27296	0.0536295	318		0.240469	0.0134681	304
5.40004	0.272891	0.0522025	318		0.24057	0.0133557	304
5.45005	0.337049	0.198103	318		0.241678	0.0173213	304
5.50016	0.368693	0.247257	318		0.251861	0.0521277	304
5.55007	0.373775	0.224441	318		0.289077	0.145879	304
5.60008	0.436311	0.258053	318		0.378006	0.270536	304
5.65012	0.463484	0.252598	318		0.486372	0.408254	304
5.7001	0.491571	0.254553	318		0.531455	0.41009	304
5.75016	0.497682	0.234059	318		0.568284	0.415596	304
5.80007	0.50492	0.221975	318		0.57308	0.391075	304
5.85014	0.518692	0.222212	318		0.585703	0.38552	304
5.90006	0.532871	0.224256	318		0.589556	0.37837	304
5.95007	0.536156	0.220028	318		0.594966	0.373873	304
6.00009	0.537863	0.21369	318		0.598499	0.369535	304
6.05015	0.540887	0.212455	318		0.599608	0.364221	304
6.10015	0.542976	0.211904	318		0.599669	0.359847	304
6.15003	0.545246	0.211253	318		0.59711	0.355611	304
6.20006	0.545526	0.211793	318		0.594102	0.352675	304
6.25013	0.54323	0.211877	318		0.58987	0.348099	304
6.30018	0.540168	0.212234	318		0.584056	0.340339	304
6.35008	0.537784	0.213813	318		0.578663	0.336251	304
6.40003	0.538217	0.217227	318		0.573868	0.330001	304
6.45009	0.535928	0.218997	318		0.568552	0.324334	304
6.50016	0.535156	0.221939	318		0.56284	0.320099	304
6.55008	0.533926	0.22366	318		0.557028	0.31513	304
6.60011	0.531934	0.224737	318		0.54886	0.308501	304
6.65007	0.529595	0.225179	318		0.541165	0.302428	304
6.70012	0.527822	0.226404	318		0.532771	0.297951	304
6.75009	0.524966	0.227837	318		0.524827	0.291363	304
6.80013	0.522986	0.230579	318		0.518177	0.286283	304
6.85013	0.519376	0.231732	318		0.510362	0.280048	304
6.90004	0.518002	0.234735	318		0.502771	0.274238	304
6.95005	0.516234	0.236439	318		0.497158	0.269635	304
7.00009	0.513101	0.237775	318		0.490071	0.264148	304
7.05008	0.510976	0.239717	318		0.483946	0.259361	304
7.10014	0.508315	0.24038	318		0.477515	0.253751	304
7.15018	0.506355	0.242622	318		0.471905	0.24859	304
7.20017	0.50505	0.2448	318		0.466668	0.244716	304
7.25019	0.503577	0.245726	318		0.461086	0.241039	304
7.30007	0.501776	0.24677	318		0.456252	0.237289	304
7.35012	0.498799	0.247091	318		0.451057	0.232805	304
7.40015	0.49584	0.247553	318		0.446366	0.230124	304
7.45018	0.493552	0.248256	318		0.441712	0.226463	304
7.50009	0.492256	0.249843	318		0.436494	0.222035	304
7.55019	0.489429	0.251161	318		0.431848	0.217867	304
7.60016	0.486374	0.251321	318		0.426715	0.214815	304
7.65011	0.482684	0.250485	318		0.421358	0.211443	304
7.70009	0.480521	0.250954	318		0.416887	0.20738	304
7.75009	0.479135	0.25273	318		0.413394	0.204164	304
7.80014	0.477634	0.252936	318		0.409128	0.201155	304
7.85005	0.475734	0.253713	318		0.404995	0.198665	304
7.90006	0.473636	0.253578	318		0.401469	0.194719	304
7.95003	0.472549	0.254765	318		0.397667	0.191825	304
8.00015	0.470079	0.254216	318		0.394136	0.188904	304
8.0501	0.467564	0.254785	318		0.389464	0.185621	304
8.10005	0.464615	0.254398	318		0.386943	0.18353	304
8.15015	0.462513	0.2535	318		0.383391	0.180578	304
8.20017	0.460097	0.252853	318		0.379378	0.176976	304
8.25014	0.458218	0.252501	318		0.376677	0.173978	304
8.30005	0.455102	0.251196	318		0.374433	0.171214	304
8.3501	0.452398	0.249154	318		0.371122	0.168958	304
8.40014	0.450159	0.248452	318		0.368	0.166817	304
8.45019	0.447917	0.247559	318		0.365342	0.163162	304
8.50016	0.445792	0.246685	318		0.362249	0.161163	304
8.55007	0.443669	0.24559	318		0.359319	0.158856	304
8.60003	0.441478	0.244662	318		0.356805	0.155984	304
8.65005	0.439668	0.243592	318		0.354122	0.153085	304
8.70007	0.437692	0.242029	318		0.351209	0.150521	304
8.75016	0.435827	0.240611	318		0.349307	0.147924	304
8.80011	0.433294	0.238364	318		0.346747	0.146219	304
8.85008	0.430756	0.236725	318		0.343939	0.143293	304
8.90006	0.428401	0.235906	318		0.342038	0.141157	304
8.95008	0.42612	0.23411	318		0.339591	0.138581	304
9.00003	0.424359	0.23254	318		0.33782	0.135933	304
9.05019	0.42201	0.230161	318		0.335369	0.133388	304
9.10019	0.419983	0.227997	318		0.333864	0.130597	304
9.15017	0.417703	0.226201	318		0.331683	0.128682	304
9.20025	0.416198	0.225469	318		0.329612	0.126264	304
9.25012	0.414936	0.224939	318		0.327583	0.123805	304
9.30016	0.412788	0.223129	318		0.325768	0.121287	304
9.35017	0.410954	0.221458	318		0.323962	0.11928	304
9.40009	0.408964	0.219462	318		0.321743	0.11732	304
9.45014	0.407308	0.218431	318		0.319628	0.114628	304
9.50011	0.40563	0.216604	318		0.318159	0.111634	304
9.55023	0.404077	0.214828	318		0.315461	0.110207	304
9.6002	0.40222	0.2135	318		0.314527	0.107467	304
9.65012	0.401045	0.211923	318		0.312806	0.106644	304
9.70016	0.398966	0.210322	318		0.310659	0.103908	304
9.75015	0.397281	0.208659	318		0.30891	0.101811	304
9.80006	0.395164	0.205863	318		0.306763	0.0995487	304
9.85003	0.393375	0.204062	318		0.305764	0.0979949	304
9.90008	0.392004	0.202108	318		0.305635	0.0963342	304
9.95017	0.390046	0.200326	318		0.303864	0.0956118	304
10	0.388544	0.199043	318		0.302776	0.0938348	304
10.0501	0.38656	0.196323	318		0.301579	0.09214	304
10.1002	0.385181	0.195237	318		0.299898	0.0904651	304
10.1501	0.384318	0.194272	318		0.298296	0.0889793	304
10.2	0.382364	0.192877	318		0.297703	0.0877299	304
10.2501	0.381496	0.191511	318		0.296137	0.0862782	304
10.3001	0.380125	0.189551	318		0.295655	0.0851345	304
10.3501	0.37904	0.187834	318		0.294727	0.0831944	304
10.4001	0.377759	0.186215	318		0.293707	0.0818569	304
10.4501	0.376582	0.184539	318		0.292917	0.0804032	304
10.5001	0.375751	0.183259	318		0.291909	0.0786181	304
10.5501	0.375552	0.182077	318		0.290777	0.0771602	304
10.6	0.374425	0.180894	318		0.289864	0.0757387	304
10.6501	0.373002	0.178786	318		0.288852	0.0753345	304
10.7002	0.371792	0.177137	318		0.287848	0.0732296	304
10.75	0.369941	0.17523	318		0.286222	0.0719146	304
10.8002	0.368903	0.173577	318		0.285109	0.0704008	304
10.8501	0.367446	0.172171	318		0.282929	0.068641	304
10.9002	0.365594	0.169912	318		0.281744	0.0657296	304
10.9502	0.363473	0.16774	318		0.279413	0.06388	304
11.0001	0.360784	0.16533	318		0.277362	0.0620383	304
11.0501	0.358274	0.16261	318		0.275622	0.0605113	304
11.1002	0.355635	0.159905	318		0.273694	0.0583735	304
11.15	0.352864	0.15683	318		0.271724	0.0564182	304
11.2001	0.349937	0.153672	318		0.269968	0.0542429	304
11.25	0.346852	0.150532	318		0.268156	0.0523323	304
11.3001	0.34391	0.147326	318		0.266861	0.0500229	304
11.35	0.340712	0.143756	318		0.265236	0.0479724	304
11.4002	0.338074	0.140179	318		0.263974	0.0465191	304
11.4502	0.335704	0.136446	318		0.262484	0.0445007	304
11.5001	0.334547	0.133876	318		0.261803	0.0428358	304
11.5502	0.332388	0.131414	318		0.260425	0.0417538	304
11.6001	0.330673	0.129113	318		0.258915	0.040837	304
11.6501	0.328426	0.126801	318		0.258732	0.0395379	304
11.7002	0.326914	0.124584	318		0.258181	0.0383473	304
11.7501	0.324616	0.121676	318		0.256743	0.0378318	304
11.8001	0.322732	0.119067	318		0.256476	0.0366525	304
11.85	0.321847	0.117008	318		0.255861	0.0359194	304
11.9001	0.320297	0.114324	318		0.255556	0.0351851	304
11.9501	0.319003	0.111876	318		0.254478	0.0347541	304
12.0001	0.317914	0.109601	318		0.253509	0.034198	304
12.0501	0.317291	0.107794	318		0.253407	0.0332258	304
12.1002	0.316368	0.106007	318		0.253271	0.0323298	304
12.1502	0.315118	0.103613	318		0.25253	0.0314256	304
12.2002	0.313739	0.101069	318		0.251579	0.0304298	304
12.2501	0.312377	0.0986554	318		0.250581	0.0294607	304
12.3001	0.310801	0.096482	318		0.249728	0.0289225	304
12.3501	0.309669	0.0941898	318		0.250342	0.0277291	304
12.4001	0.308052	0.0915463	318		0.249482	0.0273442	304
12.4501	0.306435	0.0888677	318		0.249233	0.0272524	304
12.5002	0.30521	0.0866642	318		0.249086	0.0274563	304
12.5501	0.303517	0.0842692	318		0.248815	0.0261743	304
12.6001	0.302363	0.0822683	318		0.247685	0.0251955	304
12.6501	0.301127	0.0804433	318		0.24727	0.0240148	304
12.7001	0.300422	0.0787187	318		0.246982	0.0230592	304
12.7501	0.299624	0.0773185	318		0.246399	0.0223495	304
12.8001	0.298474	0.0756605	318		0.246158	0.0216925	304
12.8501	0.297482	0.0738535	318		0.245995	0.021285	304
12.9002	0.296662	0.0719953	318		0.24569	0.02087	304
12.9501	0.295679	0.0702333	318		0.245378	0.0207068	304
13.0001	0.294992	0.0685893	318		0.245334	0.0200241	304
13.0501	0.294144	0.0676842	318		0.245008	0.019488	304
13.1002	0.293225	0.0663963	318		0.245226	0.0193098	304
13.1501	0.292224	0.065487	318		0.245325	0.0188146	304
13.2002	0.291361	0.0645031	318		0.244178	0.0191793	304
13.2502	0.29056	0.0632826	318		0.244346	0.0191755	304
13.3001	0.289924	0.0622039	318		0.244519	0.018831	304
13.3502	0.289285	0.0617559	318		0.243946	0.0199696	304
13.4	0.288756	0.0604525	318		0.24453	0.0226447	304
13.4501	0.288405	0.0600711	318		0.245096	0.0256452	304
13.5001	0.288431	0.0595412	318		0.245045	0.0264106	304
13.5501	0.288665	0.0591856	318		0.244893	0.0251053	304
13.6001	0.288038	0.0580821	318		0.244466	0.0229601	304
13.6502	0.287291	0.0564999	318		0.243975	0.0207195	304
13.7001	0.286576	0.0555572	318		0.243819	0.0193205	304
13.7501	0.285992	0.0550543	318		0.243354	0.0180787	304
13.8002	0.285332	0.0540897	318		0.242847	0.0175673	304
13.8501	0.284555	0.0534327	318		0.243308	0.0167886	304
13.9	0.284106	0.0525417	318		0.243217	0.0162239	304
13.9501	0.283308	0.0517768	318		0.242963	0.0163848	304
14.0001	0.282577	0.05102	318		0.24253	0.0165154	304
14.05	0.281784	0.0500893	318		0.242899	0.0161387	304
14.1001	0.281532	0.0497752	318		0.242908	0.0161696	304
14.1501	0.280975	0.049314	318		0.242865	0.0167003	304
14.2001	0.280578	0.0489323	318		0.242579	0.0170358	304
14.2501	0.280013	0.0479796	318		0.242141	0.0178234	304
14.3002	0.279498	0.047411	318		0.243086	0.019655	304
14.3502	0.279031	0.0474291	318		0.24334	0.0208368	304
14.4001	0.278759	0.0471141	318		0.243327	0.0205944	304
14.4501	0.278563	0.0471295	318		0.243832	0.0193593	304
14.5001	0.27847	0.046758	318		0.242619	0.0179699	304
14.5501	0.278348	0.0463979	318		0.242676	0.0167328	304
14.6	0.278085	0.0460799	318		0.242602	0.0162705	304
14.6502	0.277892	0.0460027	318		0.242016	0.0166482	304
14.7001	0.277794	0.0459966	318		0.242482	0.0174629	304
14.7502	0.277157	0.0456482	318		0.243025	0.0178214	304
14.8001	0.27671	0.0449237	318		0.243074	0.017526	304
14.85	0.276308	0.0443031	318		0.243378	0.0167378	304
14.9001	0.275689	0.043568	318		0.243419	0.0162476	304
14.95	0.274849	0.0431735	318		0.24281	0.0162634	304

## Sheet: Fig.S2C
MMTV-PyMT WT				MMTV-PyMT BK-KO
ctrl	+ PAX	+ IBTX		ctrl	+ PAX	+ IBTX
0.282717	0.878867	0.432717		1.03717	0.527967	0.852848
0.269067	1.21533	0.255458		1.08038	0.469783	0.901935
0.494417	1.05998	0.721675		0.988483	0.613933	1.05326
0.618267	0.879717	0.564072		0.95295	0.658167	0.861665
0.312883	1.09983	0.665064		0.988533	0.392933	0.780236
0.277667	0.91125	0.589294		0.855167	0.537383	0.856494
0.2564	0.985517	0.616932		1.0591	0.806833	0.734328
0.336383	0.8819	0.659363		0.962817	0.681483	0.564411
0.343383	0.979017	0.592727		0.890133	0.789683	0.963972
0.450267	1.29567	0.606271		0.644933	0.537767	0.911409
0.45315	1.41205	0.602095		0.9595	0.584317	0.852742
0.469933	1.29193	0.645502		0.987	0.760033	0.704571
0.3579	1.10792	0.9368		0.861533	0.492	0.770868
0.818567	1.4227	0.670533		0.805733	0.73585	0.809548
0.299217	1.23427	0.527342		0.850567	0.59895	0.429042
0.9723	1.24667	0.539635		0.820367	0.48655	0.326545
0.803667	1.15777	0.320165		1.01157	0.750033	0.336612
0.764667	1.2433	0.55409		0.841933	0.96245	0.642026
0.786317	1.26543	0.549893		0.831167	0.816033	0.670766
0.76695	1.1751	0.661249		0.791633	0.5338	0.6987
0.823917	1.0542	0.703554		0.702933	0.620467	0.657477
0.916467	1.26193	0.727546		0.990617	1.07193	0.894432
0.858767	1.21692	0.712138		1.036	0.849733	0.795093
0.811983	1.29008	0.802787		0.798183	0.6068	0.878536
0.643083	1.18435	0.586729		0.335717	0.943217	0.824448
0.707233	1.13007	0.771419		0.271233	0.542467	0.746812
0.731383	1.06	0.632149		1.0957	0.49195	0.986226
0.736433	1.10888	0.635583		0.860733	0.5881	0.791363
0.685917	1.32182	0.609704		0.81325	0.643383	0.9737
0.636017	1.31595	0.914906		0.785933	1.00518	0.938474
0.723617	1.33408	0.796492		0.9003	0.80665	0.845409
0.6049	0.80485	0.599171		0.691667	0.920567	0.85997
0.456333	0.869583	0.528889		0.65725	1.27145	0.997904
0.6349	1.27433	0.574733		0.948	1.12528	0.434637
0.6512	1.15702	0.543132		0.71895	1.13697	0.78297
0.579767	1.22228	0.54665		0.75075	0.794483	0.835596
0.650067	1.30378	0.559516		0.720517	0.8331	0.969673
0.66385	0.671083	0.54682		0.776533	0.556717	0.847359
0.670783	0.952767	0.592409		0.779817	0.651833	0.819403
0.622133	1.32515	0.522595		0.22295	0.62155	0.489573
0.67575	1.3583	0.659194		0.22015	0.761767	0.890278
0.61655	1.2971	0.52482		1.03717	0.7328	0.794712
0.749683	1.24035	0.506042		1.08038	0.621433	0.463377
0.8562	1.16998	0.547117		0.988483	0.636283	0.245348
0.844217	0.988017	0.568269		0.95295	0.346333	0.255628
0.726883	0.76135	0.715804		0.655533	0.74105	0.580646
0.570267	1.11433	0.601311		0.5565	0.621233	0.226273
0.807133	0.977683	0.4251		0.988533	0.60425	0.230936
0.831833	1.17085	0.362787		0.855167	0.883583	0.245433
0.687267	1.01868	0.632128		1.0591	0.608417	0.255034
0.657017	0.786483	0.478531		0.962817	0.732067	0.23988
0.719633	0.943233	0.280362		0.890133	0.830233	0.234094
0.6729	0.733517	0.310161		0.644933	0.937233	0.24804
0.59505	0.617483	0.617864		0.9595	0.8284	0.420903
0.637733	0.797717	0.608496		0.987	1.0506	0.238163
0.908717	1.00562	0.50299		0.861533	0.91725	0.251982
0.784133	0.8807	0.550275		0.805733	0.514583	0.299458
0.763617	1.47747	0.93786		0.850567	0.6674	0.35857
0.659083	0.992467	0.993856		0.820367	0.662683	0.251431
0.641783	1.01863	0.825126		1.01157	0.70185	0.266416
0.619417	1.46495	0.45509		0.841933	0.50915	0.294244
0.70095	1.51557	0.504092		0.831167	0.545217	0.258341
0.724417	1.27948	0.606207		0.791633	0.789167	0.248464
0.672667	0.904567	0.57113		0.702933	0.824117	0.226294
0.665067	0.837567	0.527851		0.990617	0.757533	0.25389
0.657333	1.40068	0.694758		1.036	0.786433	0.297106
0.730683	0.837983	0.68503		0.798183	0.697233	0.239223
0.661883	1.14108	0.684097		0.335717	0.711867	0.230003
0.7498	1.11752	0.623947		0.271233	0.889233	0.234899
0.567167	0.639517	0.766502		1.0957	0.711917	0.239266
0.476983	0.758067	0.885022		0.860733	0.940833	0.248252
0.635917	0.857333	0.648957		0.81325	0.5958	0.23437
0.804067	1.24928	0.872284		0.785933	0.56275	0.243886
0.77575	1.28083	0.825677		0.9003	0.7033	0.239817
0.785583	0.768817	0.759211		0.691667	0.676283	0.239626
0.658467	0.761533	0.720509		0.65725	0.693417	0.239308
1.02578	0.690117	0.843035		0.948	0.440217	0.223751
1.07033	1.13103	0.844922		0.71895	0.988	0.227142
0.93275	0.744433	0.869083		0.75075	0.711033	0.229707
1.03913	0.720267	0.65949		0.720517	0.85055	0.257959
0.89805	0.885133	0.676467		0.776533	0.218583	0.238354
0.776017	0.958367	0.912342		0.779817	0.44675	0.26525
0.85535	0.9232	0.763259		0.22295	0.43745	0.366814
0.836767	1.48845	0.59934		0.22015	0.229583	0.27873
0.7811	1.15207	0.603749		0.605067	0.243333	0.246429
0.831117	1.05683	0.817771		0.618067	0.5353	0.240961
0.797867	1.01182	0.592494		0.610367	0.539333	0.245285
0.705233	0.782967	0.71856		0.512933	0.55655	0.230512
0.5466	0.7226	0.578018		0.417833	0.657617	0.238672
0.696367	0.7947	0.804143		0.7707	0.61805	0.242127
0.46725	0.38855	0.563225		0.517783	0.198083	0.245645
0.534367	0.255133	0.579693		0.63705	0.762517	0.255734
0.484817	0.300283	0.494914		0.635733	0.755583	0.240113
0.68045	0.413233	0.61903		0.683867	0.4154	0.280743
0.497283	0.586283	0.722184		0.746467	0.773217	0.26525
0.688883	0.245467	0.508564		0.446167	0.915367	0.280807
0.892683	0.220233	0.693211		0.537733	0.240483	0.622718
0.93715	0.23875	0.636876		0.592783	0.571	0.240431
0.631283	0.218783	0.522828		0.607733	0.58515	0.242826
0.688983	0.229367	0.603049		0.515167	0.522333	0.239541
0.880133	0.6718	0.646307		0.62805	0.5262	0.232801
0.574383	0.811467	0.752768		0.623817	0.634667	0.251156
0.6323	0.436283	0.720721		0.674933	0.590417	0.434001
0.640017	0.4604	0.420394		0.685283	0.455467	0.285237
0.884717	0.4829	0.527893		0.59585	0.458883	0.70792
0.706333	0.435283	0.4173		0.51635	0.553583	0.263576
0.758317	0.2551	0.514413		0.442667	0.578117	0.432518
0.716967	0.26415	0.516766		0.373417	0.798883	0.23757
0.924817	0.231233	0.527512		0.572	0.608233	0.247489
0.318317	0.215583	0.575666		0.683483	0.5466	0.245666
0.605167	0.436833	0.528148		0.56075	0.626017	0.252321
0.85495	0.20335	0.473169		0.7336	0.619117	0.235154
0.3039	0.28535	0.498072		0.5454	0.659467	0.249227
0.62295	0.4676	0.630729		0.551017	0.692483	0.257005
0.248433	0.30585	0.772457		0.67715	0.561467	0.262707
0.281633	0.34305	1.02105		0.632817	0.621517	0.283054
0.4924	0.412083	0.549067		0.888283	0.576633	0.587535
0.735317	0.2613	0.69514		0.814067	0.607133	0.297106
0.43135	0.267333	0.569117		0.577533	0.654683	0.315884
0.99815	0.2698	0.434658		0.716617	0.5913	0.650822
0.886867	0.283967	0.733459		0.4272	0.4978	0.301408
0.799583	1.02593	0.719535		0.63655	0.515917	0.341699
0.712283	0.965183	0.673987		0.533633	0.541983	0.299267
0.296333	1.03178	0.71538		0.63745	0.3543	0.537876
0.411967	0.969333	0.704804		0.656233	0.442417	0.271651
0.2898	0.9416	0.979867		0.73695	0.258167	0.573525
0.247767	0.842383	0.811604		0.849417	0.61005	0.300899
0.393967	0.79735	0.241851		0.490633	0.636267	0.525223
0.589683	1.06082	0.24378		0.760717	0.601417	0.307639
0.49315	0.974517	0.245009		0.718683	0.654217	0.281379
0.714617	1.02307	0.23153		0.797867	0.431167	0.281888
0.2725	0.957933	0.241872		0.536883	0.627883	0.851047
0.2922	0.889133	0.23793		0.531767	0.568217	0.655845
0.84175	0.9734	0.230003		0.872983	0.611167	0.339198
0.490317	0.985167	0.227863		0.44895	0.552867	0.291319
0.525783	0.809383	0.225849		0.642883	0.508367	0.452271
0.6767	0.95005	0.233204		0.793917	0.499317	0.326757
0.6508	0.955	0.238291		0.7123	0.54845	0.28884
0.691317	1.03122	0.233267		0.80695	0.58415	0.28246
0.625667	0.880833	0.248951		0.727817	0.560617	0.246005
0.56225	0.9729	0.242996		0.744133	0.617567	0.247447
0.738617	0.878167	0.219978		0.897017	0.600033	0.283075
0.735433	1.08075	0.236404		0.9686	0.59475	0.428003
1.00095	1.07647	0.262198		1.03967	0.599533	0.286869
0.76815	0.75875	0.235811		1.01033	0.637517	0.255437
0.907283	0.85435	0.225849		0.62695	0.452367	0.258044
1.19615	0.910283	0.23136		0.790817	0.26425	0.269468
1.31063	0.93395	0.22674		0.291667	0.31055	0.294202
1.22723	0.835217	0.228774		0.596867	0.498067	0.268938
1.16543	0.967867	0.227291		0.514067	0.422033	0.374805
1.17535	0.967517	0.223136		0.760067	0.2863	0.271948
1.19277	0.9496	0.241279		0.717333	0.4568	0.31421
1.20497	0.819683	0.233034		0.534983	0.5414	0.378387
1.14703	0.7867	0.23721		0.806067	0.3292	0.635201
1.11252	0.773683	0.232102		0.756333	0.630733	0.316393
1.181	0.803167	0.231847		0.837933	0.645983	0.583423
1.20813	0.746233	0.22816		0.65795	0.615433	0.283583
1.17892	0.584533	0.24005		0.637033	0.540133	0.291531
1.24437	0.939017	0.236977		0.81365	0.547517	0.363805
0.30125	0.8777	0.226591		0.728017	0.581633	0.261795
1.12812	0.986267	0.224111		0.700867	0.607333	0.248167
1.13493	0.9651	0.218982		0.791617	0.66845	0.246154
1.23568	0.309417	0.234815		0.7855	0.647	0.294562
1.28315	0.31445	0.241237		0.968767	0.627983	0.278433
0.993117	0.8255	0.234158		0.6671	1.0441	0.25656
1.3797	1.01285	0.231		0.797467	0.62085	0.262643
1.05643	1.03373	0.227714		0.808517	0.3686	0.31919
1.11795	0.945	0.226316		0.9936	0.616033	0.288818
1.19443	0.906933	0.237422		0.58385	0.5703	0.447587
1.36378	0.828933	0.239583		1.00147	0.67985	0.442204
1.08618	0.877367	0.233819		0.992117	0.893383	0.277734
1.46087	0.4823	0.235493		0.434017	0.67735	0.266437
1.28935	0.807733	0.234582		0.735633	0.808083	0.315608
1.33663	0.749	0.235408		0.759833	0.638283	0.267454
0.99555	0.58965	0.23153		0.650483	0.703717	0.263003
1.26337	0.621017	0.232187		0.70985	0.664267	0.27945
1.46195	0.658283	0.238545		0.7481	0.643483	0.278433
1.27025	0.727367	0.239711		0.898983	0.693567	0.251558
1.02448	0.720117	0.227015		0.831967	0.665783	0.266543
1.24772	0.6859	0.233331		0.625783	0.67745	0.263533
1.06977	0.651333	0.231339		0.750767	0.682167	0.266437
0.84735	0.636133	0.232928		0.9072	0.665267	0.2924
1.3878	0.720583	0.267772		0.6942	0.704033	0.279811
1.50318	0.69925	0.242529		0.7403	0.649717	0.61903
1.23338	0.6676	0.24005		0.279733	0.752917	0.319233
1.46823	0.6534	0.239032		0.260317	0.721533	0.793631
1.22233	0.699767	0.236934		0.575783	0.738	0.27856
1.46917	0.713733	0.237528		0.285	0.72645	0.269129
1.23715	0.742733	0.236553		0.303717	0.866167	0.275317
0.9577	0.757017	0.235768		0.23525	0.986417	0.265314
1.09022	0.73245	0.24058		0.29685	0.790167	0.274576
1.0538	0.736617	0.223476		0.251583	0.73525	0.26152
1.14617	0.72215	0.271015		0.25545	0.514733	0.254526
1.23972	0.66975	0.397992		0.240633	0.633367	0.258213
1.0774	0.68945	0.306007		0.246483	0.705133	0.291065
1.44093	0.77965	0.261244		0.228867	0.814117	0.345238
1.83553	0.723017	0.796259		0.9638	0.687617	0.656078
1.80072	0.722667	0.801367		0.9264	0.5673	0.277712
1.71118	0.677933	0.480121		1.00878	0.635883	0.263406
0.878717	0.629483	0.887671		0.327967	0.6582	0.251813
1.10302	0.6845	0.685369		0.25845	0.714483	1.09559
1.39302	0.632333	0.957698		0.270533	0.812333	0.75529
1.18852	0.661667	0.781613		0.30125	0.64705	0.871309
1.03457	0.672383	0.69887		0.547733	0.782167	0.894581
0.978333	0.69895	0.336315		0.528033	0.60735	0.779939
1.16942	0.735117	0.492625		0.277933	0.691367	0.722777
1.1591	0.690517	0.38004		0.296767	0.707967	0.853209
1.16815	0.670567	0.515219		0.244067	0.753117	0.924316
1.17083	0.737283	0.839665		0.7153	0.856567	0.692469
1.12495	0.721817	0.322793		0.288083	0.749833	1.10523
0.997183	0.817533	0.476793		0.7641	0.802033	1.18105
1.12233	0.74335	0.312514		0.254283	0.675533	0.57893
1.19918	0.68505	0.355157		0.259667	0.729567	0.618797
1.12678	0.7099	0.609959		0.67835	0.6982	0.745583
1.23102	0.790883	0.414608		0.737617	0.6322	0.967808
1.05567	0.704	0.330868		0.820983	0.666267	0.956575
0.949033	0.69895	0.335595		1.04965	0.790883	0.891062
1.1885	0.744833	0.60307		0.987683	0.6566	0.922388
1.12562	0.718733	0.392036		0.97745	0.912983	0.604724
1.12272	0.645967	0.540907		0.833383	0.591317	0.852827
1.12377	0.716817	0.416431		0.26785	0.6594	0.714278
1.06863	0.735617	0.468358		0.297983	0.829783	0.84613
1.06733	0.995767	0.413485		1.10053	0.7978	0.812155
1.07253	0.7274	0.716546		1.20775	0.288783	0.729009
0.998117	0.688617	0.351046		1.12428	0.295	0.861877
0.845467	0.736217	0.78066		1.14333	0.296567	0.919887
0.739467	0.718217	0.75777		1.10963	0.575433	0.883814
0.704	0.638133	0.456404		0.28755	0.277317	0.923405
0.3149	0.720317	0.541267		0.269083	0.277483	1.16761
0.29105	0.679117	0.323005		0.32475	0.47325	1.03408
0.310067	0.630967	0.326269		0.39465	0.4126	1.00909
0.646183	0.757467	0.557862		0.6137	0.4409	0.718878
0.276367	0.704167	0.282651		0.269967	0.27825	1.24539
0.835267	0.749817	0.281845		0.257333	0.351367	1.05939
0.892583	0.787817	0.666866		0.881067	0.314167	1.02654
0.400683	0.702267	0.334302		0.45205	0.297667	1.11651
0.392133	0.6603	0.285745		0.62715	0.2937	0.984212
0.746417	0.717783	0.359926		0.866367	0.295833	1.01221
1.17568	0.64295	0.294287		1.132	0.278567	0.656671
0.420933	0.736183	0.456277		0.2593	0.3702	0.794309
0.394317	0.690983	0.28956		1.18312	0.748433	0.802384
0.3509	0.683467	0.282969		0.969567	0.68675	0.671656
0.353167	0.719333	0.306007		1.47157	0.227367	0.879554
0.328317	0.67875	0.297487		1.28372	0.300667	0.322687
0.30545	0.6988	0.437626		0.5527	0.5855	0.959309
0.29395	0.515033	1.07334		1.21303	0.2911	0.845727
0.662417	0.581383	0.517571		1.1184	0.259517	0.777841
0.352133	0.739733	0.725999		1.0514	0.278033	0.80781
0.56305	0.72635	0.489531		0.918667	0.3152	0.512485
0.375917	0.3277	0.524375		0.316817	0.548633	1.1426
0.81625	0.6537	0.328219		1.226	0.302633	1.17178
1.00622	0.329633	0.700926		1.10027	0.30025	0.497733
0.3391	0.94865	0.737847		1.3857	0.419983	0.491502
0.657833	0.2965	0.674263		1.4785	0.274517	1.35906
0.304717	0.39895	0.29026		1.28822	0.445717	1.44303
0.335217	0.27135	0.636409		0.897867	0.410217	1.3885
0.333367	0.4611	0.557841		1.13655	0.354983	1.66685
0.279233	0.310367	0.764806		1.0698	0.272767	1.56577
0.31065	0.75895	0.716928		0.893333	0.371233	0.858677
0.283667	0.671867	0.639525		1.02982	0.285033	1.37657
0.358783	0.572433	0.784242		0.269117	0.3439	0.638232
0.329033	0.2925	0.629013		0.272517	0.302567	0.628334
0.41005	0.705133	0.518546		1.35698	0.268483	1.33577
0.355383	0.600933	0.747003		1.43837	0.417183	1.36196
0.327317	0.32455	0.449834		1.1535	0.3399	0.997353
0.350483	0.75115	0.51204		1.17693	0.255883	1.32767
0.298417	0.58	0.689057		0.765733	0.279117	1.36684
0.298817	0.5325	0.743866		0.346433	0.744717	1.40605
0.3136	0.511783	0.592198		0.741217	0.277183	1.56022
0.330367	0.346983	0.644633		0.4021	0.573533	1.23846
0.3522	0.571467	0.742064		1.09168	0.377067	1.28376
0.277833	0.468083	0.604088		1.0554	0.314367	1.14124
0.350983	0.651517	0.431373		1.01637	0.453567	1.2174
0.382	0.7874	0.555361		0.940033	0.271967	1.05596
0.3808	0.398883	0.756498		1.47998	0.2956	1.26404
0.378733	0.621033	0.616253		1.5262	0.416467	1.24211
0.359183	0.823717	0.584991		1.00453	0.3341	0.990973
0.370717	0.3144	0.720912		0.308267	0.6423	0.946528
0.3319	0.309767	0.467997		0.293367	0.484667	1.0422
0.3419	0.318067	0.626681		0.746117	0.3712	1.02656
0.358317	0.3881	0.668138		0.359783	0.817433	1.30872
0.2902	0.71335	0.695394		0.98735	0.2537	1.13416
0.303117	0.330133	0.495275		0.760417	0.26555	1.04816
0.304467	0.258683	0.784729		1.29085	0.249967	0.374275
0.306217	0.259133	0.827224		1.34147	0.283333	0.841001
0.3145	0.2748	0.695754		0.865233	0.323717	0.304714
0.330367	0.609183	0.546248		0.842833	0.4267	0.290196
0.397283	0.2821	0.77659		1.26007	0.256033	0.280574
0.377617	0.450583	0.935486		1.10183	0.700833	0.298165
0.345067	0.802217	0.715656		0.9939	0.387367	0.903186
0.31855	0.3154	0.863997		0.820067	0.71255	0.360562
0.3209	0.296383	0.885976		1.24502	0.94525	1.24904
0.400033	0.770167	0.809209		1.16172	0.689383	0.836825
0.36015	0.543817	0.337184		1.35907	0.402017	0.843184
0.317867	0.524533	0.428915		0.979733	0.445217	1.03033
0.359117	0.279067	0.562334		1.12735	0.2631	0.325697
0.346867	0.309817	0.367556		0.812367	0.340733	0.268344
0.379233	0.7181	0.569816		1.68572	0.336733	0.57291
0.364083	0.637317	0.412849		1.79502	0.299517	1.21992
0.368133	0.63815	0.562186		1.10075	0.551333	1.22433
0.352533		0.302383		1.17058		1.33411
0.410317		0.527385		1.23602		1.63444
0.3845		0.6295		1.20073		1.38576
0.29925		0.527469		1.2409		1.30836
0.351383		0.501188		1.31433
0.355633		1.08955		1.02613
0.35125		0.646901		1.58843
0.291733		0.666082		1.19058
0.363217		0.618373		1.40988
0.3409		0.593003		0.9706
0.321		0.544149		0.911767
0.388417		0.276483		0.885767
0.37385		0.446294		1.27032
0.36205		0.471049		1.20403
0.407383		0.488556		1.44685
0.41525		0.611569		1.37928
0.3922		0.579375		1.27943
0.333		0.550275		0.236733
0.332667				0.339733
0.303283				0.308583
0.310983				0.253683
0.721667				1.08022
0.700733				0.9493
0.745483				1.09457
0.914483				1.13615
0.63625				0.851983
0.5984				0.745567
0.72855				0.7872
0.631883				0.848667
0.798517				1.08002
0.685				0.8732
0.639533				0.9438
0.99665				0.994267
0.78205				0.7882
0.857033				0.60835
0.9332				0.608267
0.596833				0.691633
0.64105				1.08978
0.795467				0.912117
0.870217				1.03583
0.648983				1.14315
0.573433				0.910017
0.782717				1.04202
0.64515				0.7921
0.527883				0.86375
0.711633				0.437967
0.9478				0.293533
0.93875				1.06028
0.60645				0.92545
0.527533				1.11598
0.583567				0.981417
0.5916				0.5057
0.668817				0.281467
0.8819				0.261233
0.6872				0.256367
0.589433				0.265867
0.655917				0.262067
0.746783				0.384083
0.699233				1.3898
0.81415				0.37085
0.697283				0.60745
0.892783				1.22962
0.87335				0.52175
0.743667				0.583467
0.8673				0.317883
0.900133				0.67405
0.903833				0.299817
0.935117				0.772667
0.684				0.69665
0.600933				0.273933
0.878433				0.21775
0.759833				0.237283
0.892333				0.2342
0.635367				0.23775
0.792817				0.9869
0.79015				0.582967
0.7883				1.11092
0.8591				0.682417
0.673317				1.22098
0.796617				0.878267
0.774733				1.17488
0.568167				0.859717
0.654883				0.28565
0.660333				1.25708
0.882267				0.33865
0.28255				1.23052
0.30925				1.07472
0.375983				1.04755
0.288667				0.877733
0.2548				0.285733
0.2973				0.45305
0.476283				0.4662
0.638467				0.569517
0.27765				0.521817
0.604233				0.6261
0.626883				0.407583
0.565783				0.515983
0.550983				0.604867
0.284033				0.467233
0.291017				0.516617
0.608883				0.517483
0.30935				0.561133
0.506033				0.507
0.310683				0.467483
0.309133				0.528817
0.315283				0.644317
0.400467				0.6141
0.488317				0.5557
0.526317				0.501967
0.436467				0.561533
0.58875				0.647383
0.433467				0.60255
0.3138				0.598167
0.795717				0.5891
0.270283				0.618783
0.2754				0.612817
0.74425				0.727717
0.29				0.780367
0.307933				0.499033
0.329				0.57325
0.28605				0.59075
0.282917				0.6607
0.358633				0.469917
0.445667				0.591733
0.510567				0.507017
0.6872				0.484733
0.510583				0.45865
0.28365				0.380783
0.761967				0.381767
0.499117				0.58055
0.515783				0.3551
0.641348				0.464817
0.674411				0.370233
0.419229				0.547883
1.00322				0.447767
0.947313				0.49305
0.876735				0.49215
0.73702				0.506567
1.03169				0.461567
0.777141				0.533667
0.723328				0.385133
0.874785				0.3006
0.899222				0.360117
0.82803				0.32065
0.863827				0.667483
0.846511				0.665883
0.765018				0.28005
0.926923				0.420383
0.927538				0.302283
1.03961				0.492267
1.03616				0.2471
0.760991				0.252733
0.773051				0.272367
0.870843				0.254433
1.08292				0.348417
0.799205				0.265033
0.88659				0.255683
1.05343				0.287567
1.12174				0.24695
0.860839				0.248883
0.995594				0.244667
0.884619				0.237533
0.905135				0.4778
0.921243				0.506833
0.75317				0.480967
0.764658				0.270817
0.841064				0.265833
0.931947				0.254283
0.745286				0.274733
0.870927				0.48745
0.894729				0.275783
0.87222				0.258883
0.901151				0.264683
0.695966				0.615733
0.727843				0.2701
0.87665				0.230417
1.00751				0.2385
0.618733				0.2371
1.11852				0.2382
1.0329				0.234967
0.721696				0.253167
0.77854				0.266667
0.975141				0.2397
0.818662				0.2307
0.981097				0.712
0.640521				0.273133
0.55055				0.273067
0.709467				0.29325
0.919632				0.257733
0.952399				0.259367
0.909671				0.230483
0.722014				0.2726
0.482728				0.25915
0.796005				0.272883
0.574797				0.2635
0.684881				0.270917
0.643764				0.267617
0.824299				0.236383
0.950979				0.265217
0.525223				0.249367
0.464755				0.708333
0.777035				0.5508
0.580625				0.263133
0.556569				0.269083
0.681215				0.268333
0.584589				0.247383
0.697704				0.239583
1.06214				0.27767
0.941505				0.248824
0.957677				0.268938
0.673267				0.249397
0.713452				0.275339
0.56403				0.362915
0.868532				0.296576
0.746176				0.259337
0.606589				0.454178
0.647007				0.405092
0.496928				0.239117
0.500679				0.242657
0.577467				0.254759
0.771504				0.253084
0.571999				0.307406
0.796492				0.305647
0.798484				0.346701
0.477726				0.360922
0.555022				0.262601
0.57539				0.297593
0.744735				0.483385
0.534781				0.430462
0.637406				0.256264
0.639059				0.293375
0.561953				0.259337
0.588446				0.270739
0.564963				0.245878
0.64192				0.240919
0.563818				0.342229
0.549639				0.242212
0.877328				0.319466
0.914843				0.245264
0.680515				0.252809
0.551928				0.248782
0.623226				0.257662
0.704317				0.238969
0.727483				0.256052
0.819234				0.245899
0.613307				0.261138
0.292994				0.279938
0.577277				0.368489
0.398119				0.33729
0.266055				0.303273
0.41713				0.281231
0.262113				0.256391
0.603982				0.248252
0.388348				0.246133
0.259019				0.883029
0.241639				0.849796
0.247849				0.449855
0.270591				0.669876
0.257959				0.995467
0.263343				0.708153
0.248528				0.957359
0.248506				1.37712
0.750775				0.437943
0.717691				0.519225
0.275106				1.00221
0.238015				1.07228
0.538406				1.12285
0.301493				1.02219
0.347888				1.16803
0.460367				0.67651
0.550423				0.660169
0.80639				0.52518
0.332119				0.49146
0.458417				0.590883
0.28405				0.336867
0.299924				0.372855
0.257408				0.482219
0.812727				0.72424
0.261244				0.732421
0.284156				0.676425
0.256073				0.769363
0.243356				0.876078
0.245115				1.18518
0.239244				1.03031
0.276971				1.01721
0.590099				1.09368
0.234582				0.604024
0.370184				0.842103
0.249312				1.22912
0.244988				1.06861
0.265165				0.749186
0.254547				1.32913
0.258171				0.796153
0.582194				1
0.244734				1.08961
0.247256				0.677781
0.260672				0.913634
0.77019				0.270019
0.34314				0.251262
0.604808				0.576047
0.253106				0.245136
0.278963				0.501167
0.252745				0.340872
0.257323				0.30073
0.242466				0.933049
0.268578				0.895238
0.246027				0.675959
0.253975				0.246408
0.257196				0.232738
0.290344				0.590968
0.308275				0.232992
0.296554				0.259782
0.402358				0.223624
0.697132				0.243992
0.663984				0.380633
0.270125				0.24272
0.785068				0.275063
0.26737				0.228308
0.358909				0.224599
0.320992				0.254653
0.322412				0.226316
0.293269				0.226994
0.345599				0.442458
0.605444				0.301408
0.363678				0.250795
0.303506				0.233691
0.318194				0.240007
0.351703				0.295262
0.853357				0.240368
0.369231				0.273791
0.436036				0.256179
0.287377				0.257599
0.292188				0.23526
0.291976				0.230258
0.29062				0.233861
0.59525				0.264
1.09044				0.245073
0.296173				0.228944
0.295834				0.240135
0.283774				0.252639
0.353653				0.596076
0.270125				0.423934
0.250244				0.260397
0.316901				0.518356
0.282948				0.258849
0.531433				0.23846
0.474398				0.247531
0.515622				0.248379
0.34261				0.240982
0.345577				0.250371
0.689693				0.239647
0.339643				0.619348
0.30251				0.421708
0.286975				0.243547
0.321373				0.503583
0.352974				0.206732
0.33231				0.496313
0.324574				0.244988
0.312132				0.247934
0.330508				0.596606
0.565874				0.247023
0.492456				0.214108
0.42972				0.237379
0.758299				0.281188
0.872814				0.258786
0.604363				0.320526
0.48419				0.290578
0.42883				0.510386
0.508013				0.556569
0.689078				0.265822
0.794139				0.246747
0.707009				0.239901
0.866667				0.268472
0.696814				0.256136
0.629246				0.250054
0.877985				0.238206
0.550571				0.28388
0.567082				0.263766
0.562419				0.256518
0.681723				0.248443
0.836423				0.260333
0.732548				0.263851
0.876099				0.247934
0.711756				0.269404
0.908844				0.25815
0.695161				0.261371
0.693486				0.255861
0.515833				0.258023
0.578824				0.230406
0.525223				0.248888
0.924211				0.250244
0.611527				0.241067
0.622463				0.256878
0.849076				0.277183
0.674962				0.273304
0.582978				0.333412
0.597284				0.395576
0.720615				0.304227
0.600527				0.280023
0.697577				0.269044
0.647812				0.266607
0.58798				0.28068
0.686662				0.263809
0.633548				0.297869
0.733438				0.280595
0.553581				0.25514
0.491121				0.303761
0.595313				0.274427
0.619772				0.383219
0.647749				0.250859
0.879151				0.266395
0.755883				0.259358
0.70722				0.278751
0.996399				0.261944
0.844731				0.279662
0.630835				0.273622
0.795008				0.269171
0.4833				0.278094
0.559304				0.255395
0.58461				0.264635
0.585479				0.282142
0.811689				0.256285
0.864315				0.265038
0.812261				0.264593
0.731976				0.263449
0.789286				0.373152
0.48366				0.703766
0.584568				0.614409
0.653641				0.24645
0.342102				0.248676
0.814931				0.470731
0.968889				0.460728
0.58586				0.52003
0.522595				0.446019
0.719386				0.474038
0.822392				0.537155
0.779346				0.38235
0.682656				0.509835
0.599552				0.45473
0.92137				0.351258
0.735261				0.307851
0.806326				0.313531
0.960898				0.349011
0.703745				0.258574
0.876713				0.640754
0.663729				0.535693
0.8566				0.460537
0.527533				0.564793
0.628207				0.742552
0.536392				0.518568
0.615342				0.566806
0.579566				0.513968
0.739012				0.508225
0.689142				0.530649
0.823473				0.492011
0.953395				0.438071
0.789307				0.472046
0.706224				0.635074
0.563754				0.475839
0.581452				0.297339
0.546396				0.369146
0.56687				0.613858
0.70775				0.72939
0.566679				0.688569
0.57893				0.648278
0.549702				0.640945
0.604088				0.53688
0.430377				0.808785
0.610849				0.497182
0.644591				0.266013
0.731976				0.484805
0.674538				0.316329
0.748126				0.719471
0.41446				0.832502
0.908272				0.683037
0.532132				0.291192
0.692808				0.277818
0.68414				0.6004
0.498157				0.235111
0.576916				0.239117
0.33587				0.238926
0.868448				0.426753
0.654213				0.399263
0.584356				0.269129
				0.687128
				0.774683
				0.248845
				0.528508
				0.447947
				0.565174
				0.557269
				0.466874
				0.551631
				0.239138
				0.235345
				0.263555
				0.419483
				0.457824
				0.370481
				0.212582
				0.223242
				0.347888
				0.225298
				0.2484
				0.239032
				0.441631
				0.431246
				0.343755
				0.259252
				0.235726
				0.22621
				0.244267
				0.476666
				0.363614
				0.229283
				0.477323
				0.492647
				0.402379
				0.258701
				0.37667
				0.285533
				0.396911
				0.426096
				0.234942
				0.260926
				0.324701
				0.258531
				0.38377
				0.252194
				0.381566
				0.509094
				0.535354
				0.57592
				0.494554
				0.554026
				0.542051
				0.509518
				0.436205
				0.384766
				0.258383
				0.523485
				0.519818
				0.470795
				0.434743
				0.253296
				0.420627
				0.494978
				0.299161
				0.275084
				0.426096
				0.249397
				0.235578
				0.408716
				0.39087
				0.255119
				0.314782
				0.217689

## Sheet: Fig.S2D
MDA-MB-453
ctrl	+ PAX	+ IBTX
1.9991	1.568	1.033
2.7429	1.8958	1.2272
1.8944	1.8633	1.8165
1.3944	2.1193	2.2845
1.4982	1.585	2.2289
1.3084	1.3098	1.1342
1.2726	1.3657	1.8922
1.1529	1.3321	1.5481
1.4364	1.4314	1.7137
1.4152	1.4254	1.069
1.2631	1.3445	2.3088
1.8809	1.5806	3.1045
2.887	1.7792	2.2408
1.403	1.4574	2.6976
1.2635	1.6524	2.5433
1.6002	1.1002	2.2696
1.34	1.6194	1.6846
1.9246	1.2427	2.4857
1.3876	1.0594	1.2208
1.5319	1.1352	0.7319
1.6134	2.1142	1.0025
2.1368	1.0544	2.4135
1.933	1.1734	0.8461
1.9519	1.2607	1.2349
2.3143	1.8725	0.7672
1.8323	1.6393	0.7195
1.9373	0.9654	0.8506
2.1974	1.6417	1.0679
1.7094	1.4282	2.2493
1.7286	1.8547	0.8894
2.1077	1.3904	2.0525
2.1285	1.8574	0.9681
1.7164	1.9047	1.9653
2.1252	1.662	1.1493
1.7686	1.1099	1.8287
1.4742	0.922	1.6756
0.9998	1.148	0.7038
0.9147	1.2436	0.9196
1.0901	1.6603	0.6759
0.795	1.7453	2.1801
0.8567	1.3228	1.7287
0.8961	0.9991	1.3684
1.1668	1.7448	0.8774
0.8555	1.6396	0.9865
0.8424	1.4432	0.8432
1.5208	0.9339	0.9175
1.7888	0.9313	0.7893
1.8563	0.9748	1.0556
2.2228	0.8005	1.0647
1.2009	0.862	1.5576
1.0235	1.139	0.7203
1.1578	1.2162	0.9913
1.1559	0.9791	1.3375
1.0673	0.9256	1.5855
1.0027	1.1036	1.8069
1.0313	0.8154	1.2651
1.1742	1.1643	1.8501
1.9476	1.9466	1.3019
2.0171	1.2901	0.9877
1.1407	1.8153	0.8389
1.5463	1.1572	1.2287
1.2804	1.1951	1.0611
1.0236	1.3933	1.5725
1.0013	1.2416	0.8769
1.564	1.0756	0.8619
1.6447	1.4603	1.1671
1.6124	1.8613	2.3576
1.5633	0.7302	2.2482
0.9146	1.2093	2.8014
1.2858	0.9096	1.7907
0.8761	0.9943	2.1062
0.8882	2.3952	1.9291
1.0665	2.7192	0.9836
0.8651	0.977	1.8734
0.8419	1.279	2.0912
1.0152	0.7	1.9088
0.9721	1.1236	1.3153
1.8562	1.3464	2.4063
0.9433	1.4766	2.1839
2.4111	2.5218	1.9031
2.3906	1.8482	0.9337
2.7042	1.7865	0.8201
1.501	2.467	0.8706
1.874	1.4165	1.4576
2.2077	1.0187	1.5569
1.5188	1.4434	1.1691
1.0759	1.4281	0.6589
1.6515	1.1879
1.595	0.8255
1.0159	1.2223
1.6076	1.0892
1.504	0.8909
2.6351	1.4796
1.6761	1.3859
1.1034	1.924
0.9898	1.2641
1.1486	0.9433
1.4418	1.0379
1.0507	1.1445
0.9681	1.0925
1.0065	1.2388
1.2029	0.6675
1.2004	0.998
1.3934	1.1925
1.5713	1.8038
1.2919	1.1102
1.107	1.1651
1.1447	1.202
1.0652	0.9327
0.9463	1.0912
2.0367	1.4804
1.5056	1.0043
1.3732	1.2339
1.7864	0.8963
1.4785	1.8319
1.106	0.694
1.4905	0.7084
1.83	1.1109
1.3259	1.181
0.9651	1.1432
0.9567	1.1549
1.2439	1.1588
1.275	1.4867
1.1816	1.3117
1.0368	1.2902
1.8688	0.8597
1.2566	0.7476
0.9759	1.2735
0.9971	1.2555
1.109	1.0698
1.5231	1.0382
1.5245	1.2118
0.8587
0.8811
0.9184
0.9267
1.0154
1.1367
1.864
0.9768
1.056
1.1618
1.0295
0.9494
1.6138
0.9065
1.9564
0.9038
0.8611
0.9781
1.1156

## Sheet: Fig.S2E
MCF-7
ctrl	+ BKCa - RFP	+ BKCa-DEC - RFP
0.608367	0.576067	0.73995
0.648833	0.425267	0.554183
0.63915	0.267567	0.8654
0.6465	0.569367	1.00197
0.636433	0.509133	0.8894
0.452317	0.633667	0.971333
0.614783	0.775333	0.850333
0.533133	1.05078	0.3295
0.4798	0.6579	0.830767
0.451983	0.718767	0.533433
0.2646	0.469483	1.14667
0.549217	0.562917	0.988917
0.703767	1.10938	0.8099
0.460017	0.559083	0.96245
0.85385	0.4525	0.838267
0.511117	0.769017	0.459567
0.45215	0.7846	0.825233
0.618217	0.8729	0.8001
0.4454	0.413233	0.7981
0.513133	0.629483	1.04467
0.549317	0.552533	0.948683
0.519367	0.943167	0.75055
0.306283	0.563683	0.674467
0.541233	0.688933	1.03878
0.565633	0.838333	0.861767
0.64335	0.811367	1.13545
0.255883	0.633983	1.05457
0.3344	0.66965	0.879717
0.2958	0.621167	1.04797
0.307083	0.518483	0.799567
0.2716	0.637417	0.795067
0.661567	0.838333	0.7664
0.666783	0.420367	0.660667
0.753133	0.635983	0.802233
0.744233	0.5241	1.02238
0.8682	0.399667	0.997933
0.86055	0.45895	0.561217
0.358083	0.6578	0.701133
0.39355	0.487117	0.406617
0.49185	0.814833	0.657867
0.5249	0.8667	0.6589
0.668767	0.576767	0.669067
0.64625	0.7154	0.692017
0.528533	0.72665	0.73945
0.823333	0.434933	0.705767
0.803567	0.799967	1.0282
0.68965	0.72625	0.8577
0.420067	0.814233	0.748617
0.5562	0.6633	0.4332
0.593633	0.626033	0.476333
0.351183	0.549483	0.467867
0.467967	0.540567	0.6376
0.421483	0.686517	0.8689
0.369583	0.576633	1.13455
0.361367	0.673633	0.699183
0.360567	0.693483	0.941133
0.441733	0.78375	0.9866
0.42925	0.730717	1.00257
0.390133	0.517783	0.866
0.37035	0.764667	0.787583
0.710817	0.559233	0.5638
0.43095	0.581367	0.807033
0.526133	0.7764	0.745233
0.432	0.85895	0.483883
0.489733	0.561833	0.62495
0.559367	0.552617	0.5976
0.43765	0.439817	0.804733
0.33525	0.552417	0.814833
0.268317	0.429717	0.59955
0.266617	0.312483	0.36185
0.24275	0.467617	0.24045
0.409533	0.545467	0.533367
0.267033	0.5377	0.8657
0.470967	0.3228	0.891
0.457017	0.441833	0.86535
0.435017	0.665833	0.790967
0.381883	0.25375	0.810767
0.512117	0.549667	0.724
0.485883	0.50565	0.74885
0.382133	0.455017	0.86545
0.3667	0.748017	0.617933
0.392433	0.59775	0.8642
0.599467	0.361917	0.636717
0.3229	0.466667	0.664817
0.4227	0.318633	0.750683
0.255333	0.484483	0.58085
0.305567	0.460633	0.800183
0.649117	0.459617	0.457467
0.769983	0.44475	1.01205
0.398033	0.652233	0.90335
0.740367	0.661717	0.60335
0.35915	0.582517
0.555517	0.604133
0.274117	0.4597
0.234533	0.558217
0.223	0.586683
0.19225	0.2581
0.223483	0.715667
0.182483	0.926717
0.223983	0.417617
0.2175	0.452167
0.224767	0.392
0.150867	0.250317
0.165683	0.5691
0.285067	0.9212
0.199183	0.772567
0.177333	0.4619
0.247883	0.522883
0.187033	0.457333
0.218367	0.2873
0.318533	0.7309
	0.513517
	0.492783
	0.381983
	0.62225
	0.708017
	0.74115

## Sheet: Fig.S2F
MMTV-PyMT WT
Time (min)	Average	SD	N (cells)
0	0.161818	0.0779696	109
0.0705417	0.161949	0.0787584	109
0.138198	0.162029	0.0791875	109
0.205815	0.162421	0.0796368	109
0.273613	0.162999	0.0802641	109
0.341265	0.16304	0.0795614	109
0.408622	0.163589	0.0801123	109
0.476422	0.164159	0.0797271	109
0.544235	0.164713	0.0800839	109
0.612032	0.16631	0.0805263	109
0.679617	0.167445	0.0814938	109
0.747188	0.168051	0.0823836	109
0.814683	0.16837	0.0826573	109
0.882327	0.169657	0.0836067	109
0.950263	0.170116	0.0837394	109
1.01814	0.170159	0.0835752	109
1.08529	0.171056	0.0837376	109
1.1534	0.17095	0.0837103	109
1.22131	0.170492	0.0833829	109
1.28906	0.170082	0.083499	109
1.3571	0.169917	0.0843587	109
1.42456	0.169908	0.0849472	109
1.49204	0.168726	0.0845989	109
1.5598	0.167612	0.0839971	109
1.62737	0.165952	0.0840443	109
1.69487	0.165104	0.0841364	109
1.76263	0.162433	0.0835642	109
1.8308	0.161168	0.0839996	109
1.8987	0.159668	0.0831196	109
1.9664	0.158241	0.0831791	109
2.03452	0.156222	0.0813065	109
2.10217	0.153239	0.0785644	109
2.16978	0.152487	0.0786973	109
2.23723	0.148785	0.0761387	109
2.30489	0.146502	0.0742329	109
2.37226	0.144422	0.0734784	109
2.43979	0.141876	0.0722036	109
2.5074	0.139161	0.0710408	109
2.57473	0.137527	0.0705449	109
2.64196	0.135492	0.0689104	109
2.7093	0.135136	0.0679992	109
2.77695	0.14221	0.06868	109
2.84461	0.193868	0.0892353	109
2.91189	0.378081	0.176537	109
2.97954	0.811252	0.231562	109
3.04673	1.09598	0.210189	109
3.11427	1.14127	0.218255	109
3.18204	1.12658	0.224351	109
3.24986	1.09654	0.232351	109
3.31699	1.05127	0.242378	109
3.38471	0.998487	0.250928	109
3.45238	0.938438	0.259319	109
3.51985	0.869822	0.263617	109
3.58717	0.79983	0.265553	109
3.65493	0.731098	0.264909	109
3.72208	0.662274	0.261034	109
3.78962	0.597201	0.253383	109
3.85688	0.535637	0.243865	109
3.92429	0.479958	0.233631	109
3.9919	0.42964	0.221515	109
4.05987	0.382167	0.207453	109
4.12736	0.341569	0.194815	109
4.19471	0.304943	0.182296	109
4.26227	0.27235	0.169424	109
4.32974	0.243168	0.15772	109
4.39753	0.217764	0.146192	109
4.46502	0.195081	0.135449	109
4.53277	0.175224	0.125424	109
4.60017	0.157964	0.116715	109
4.66775	0.142849	0.107566	109
4.73534	0.128811	0.0991776	109
4.80278	0.11719	0.0924353	109
4.86995	0.105743	0.0849111	109
4.93801	0.096509	0.079862	109
5.00522	0.0874915	0.0749588	109
5.07275	0.0800113	0.0709308	109
5.14035	0.0735718	0.0676009	109
5.2077	0.0673128	0.0645654	109
5.27525	0.0614725	0.0612988	109
5.3428	0.0567154	0.0580625	109
5.41047	0.0523809	0.0559318	109
5.47798	0.0484535	0.0539867	109
5.54546	0.0443596	0.051972	109
5.61281	0.0408581	0.0499288	109
5.68048	0.0380049	0.0477093	109
5.74791	0.0348534	0.0456253	109
5.81534	0.0327364	0.0445821	109
5.88257	0.0307302	0.0428555	109
5.94995	0.0281797	0.0410471	109
6.01716	0.0265648	0.0393577	109
6.08446	0.0243268	0.0378396	109
6.15217	0.0229142	0.0366388	109
6.21952	0.0210263	0.0349997	109
6.28709	0.0199317	0.0334838	109
6.35476	0.0184994	0.0322524	109
6.42211	0.0172587	0.0309417	109
6.48953	0.0158994	0.0295462	109
6.55689	0.0154822	0.0283883	109
6.62437	0.0136521	0.0264084	109
6.69208	0.0129777	0.0254513	109
6.75965	0.0120051	0.0242313	109
6.82715	0.0111792	0.0228948	109
6.89447	0.0104688	0.0217957	109
6.96188	0.00963803	0.0207014	109
7.0297	0.00908151	0.0198625	109
7.09713	0.008037	0.0172212	109
7.16465	0.00605712	0.013466	109
7.2322	0.00460274	0.0104148	109
7.29955	0.00372973	0.00810456	109
7.36681	0.00340466	0.00696442	109
7.43399	0.00288678	0.00570994	109
7.50157	0.00295209	0.00519695	109
7.56944	0.00240177	0.00466143	109
7.6373	0.00216792	0.0040615	109
7.70482	0.00208358	0.00368438	109
7.77224	0.002235	0.0030628	109
7.83959	0.001746	0.00216961	109
7.90699	0.00170645	0.0018022	109
7.97447	0.00160991	0.00166732	109
8.04198	0.00114174	0.00201173	109
8.10948	0.00109001	0.00232015	109
8.17713	0.000776751	0.00277393	109
8.24457	0.000881107	0.00302313	109
8.31208	0.00117811	0.00294783	109
8.37946	0.000942077	0.0032871	109
8.44715	0.0010941	0.00333391	109
8.51474	0.00776355	0.00492312	109
8.58228	0.0895041	0.0525044	109
8.64972	0.916127	0.327448	109
8.717	1.55832	0.202069	109
8.78441	1.77865	0.236655	109
8.85197	1.91616	0.268453	109
8.91944	2.03547	0.288862	109
8.98708	2.14471	0.296643	109
9.05493	2.23341	0.295552	109
9.1223	2.30718	0.290913	109
9.19016	2.36598	0.270949	109
9.25745	2.40466	0.257194	109
9.32458	2.42891	0.25038	109
9.39206	2.45806	0.245304	109
9.45953	2.47709	0.241614	109
9.52739	2.49523	0.231212	109
9.59484	2.50981	0.237279	109
9.66243	2.53164	0.2337	109
9.73001	2.54008	0.228374	109
9.79748	2.56555	0.230425	109
9.86486	2.57298	0.22556	109
9.93211	2.58885	0.225148	109
9.9997	2.60291	0.22199	109
10.0669	2.59863	0.219347	109
10.1344	2.61174	0.216473	109
10.2022	2.626	0.220686	109
10.2696	2.62872	0.218129	109
10.3374	2.64274	0.222434	109
10.4048	2.64669	0.217567	109
10.4722	2.6534	0.215595	109
10.5397	2.65127	0.216737	109
10.6072	2.65557	0.211556	109
10.6748	2.6677	0.218187	109
10.7422	2.67015	0.212654	109
10.8099	2.67514	0.212368	109
10.8774	2.68014	0.209554	109
10.9447	2.67656	0.205827	109
11.0122	2.68729	0.217636	109

## Sheet: Fig.S2G
MMTV-PyMT BK-KO
Time (min)	Average	SD	N (cells)
0	0.0967293	0.0461317	93
0.06755	0.0967247	0.0448404	93
0.137298	0.0971033	0.0438485	93
0.204633	0.0985762	0.0434297	93
0.2723	0.0996126	0.0429552	93
0.339838	0.099501	0.0423477	93
0.407132	0.0998819	0.0418923	93
0.47469	0.0994142	0.0419298	93
0.542157	0.100155	0.041673	93
0.609632	0.0998811	0.0415948	93
0.677252	0.100197	0.0411574	93
0.74483	0.100015	0.0413124	93
0.812265	0.100208	0.0417077	93
0.879815	0.100349	0.0413052	93
0.947212	0.0995742	0.041176	93
1.01486	0.0992125	0.0407697	93
1.08226	0.099018	0.0409838	93
1.1497	0.099513	0.0407344	93
1.21735	0.0992038	0.0408958	93
1.28465	0.0988245	0.0409284	93
1.35215	0.0981534	0.0413386	93
1.4196	0.0979881	0.0413662	93
1.48733	0.0977739	0.0414233	93
1.55476	0.0971969	0.0418125	93
1.62221	0.0975686	0.0418905	93
1.68965	0.097169	0.0421439	93
1.75708	0.0973295	0.0420611	93
1.82487	0.0975587	0.0425011	93
1.89226	0.0972833	0.0422457	93
1.95988	0.0969427	0.0426853	93
2.02712	0.0972139	0.0427522	93
2.09475	0.0963487	0.0428058	93
2.16215	0.096268	0.0425515	93
2.22961	0.0969407	0.0428397	93
2.29729	0.0967959	0.0425087	93
2.36482	0.0968551	0.0431826	93
2.43234	0.0971449	0.0433443	93
2.49972	0.0970599	0.0431622	93
2.56711	0.0977083	0.0433376	93
2.63479	0.0973091	0.0433599	93
2.70235	0.0969242	0.043307	93
2.76968	0.0966781	0.0427291	93
2.8373	0.0963474	0.0426857	93
2.90481	0.0969329	0.042105	93
2.97223	0.0967908	0.0419628	93
3.03967	0.0969183	0.0412773	93
3.10715	0.0971374	0.0409853	93
3.17484	0.100003	0.0415175	93
3.24231	0.164652	0.0743985	93
3.30973	0.551469	0.25962	93
3.37729	0.875055	0.310243	93
3.44473	0.891959	0.331269	93
3.51231	0.80568	0.336371	93
3.57978	0.695483	0.327339	93
3.64718	0.589746	0.312999	93
3.71472	0.492952	0.288528	93
3.78213	0.405158	0.255502	93
3.84978	0.33191	0.224869	93
3.91735	0.270408	0.191688	93
3.98477	0.22133	0.163974	93
4.05212	0.183741	0.139272	93
4.11973	0.152722	0.118898	93
4.18727	0.128023	0.101421	93
4.2548	0.10733	0.0870002	93
4.32231	0.0921495	0.0756802	93
4.38979	0.0793545	0.0657488	93
4.45721	0.0684141	0.0581115	93
4.52476	0.0599273	0.0514799	93
4.59233	0.0528737	0.0463525	93
4.65983	0.0460007	0.0417198	93
4.72724	0.0408481	0.0376536	93
4.79482	0.0365332	0.0344507	93
4.86233	0.0324594	0.0316723	93
4.9296	0.0314233	0.0282297	93
4.99718	0.0262693	0.0264777	93
5.06476	0.0239993	0.0243907	93
5.13231	0.0216814	0.0228852	93
5.19972	0.0197928	0.0208293	93
5.26715	0.0178874	0.0194819	93
5.33469	0.0161728	0.0182485	93
5.40213	0.0151264	0.0167811	93
5.46978	0.0136161	0.0156711	93
5.53727	0.0126696	0.0145026	93
5.60461	0.0116378	0.0139635	93
5.6723	0.0110818	0.0129501	93
5.73975	0.0102188	0.0119572	93
5.80733	0.00937592	0.0112713	93
5.87468	0.00879495	0.0105715	93
5.94234	0.00793294	0.00995254	93
6.00985	0.00801571	0.00944984	93
6.07714	0.00750889	0.00889959	93
6.14483	0.00707699	0.00839099	93
6.21217	0.00665552	0.00807495	93
6.2798	0.00609181	0.0076376	93
6.34732	0.00594393	0.00706583	93
6.41472	0.00555384	0.00663809	93
6.48234	0.00553768	0.00628846	93
6.54969	0.00516212	0.00585391	93
6.61721	0.00524115	0.00550984	93
6.68479	0.0044221	0.00514731	93
6.75232	0.00481144	0.00470554	93
6.81962	0.00459411	0.00464121	93
6.8871	0.00422926	0.00435842	93
6.95481	0.00455239	0.00416676	93
7.02209	0.00431512	0.00443647	93
7.08963	0.00428843	0.00430583	93
7.1573	0.00421533	0.00474347	93
7.2247	0.00407325	0.00455781	93
7.29231	0.00438907	0.00454518	93
7.35981	0.00366604	0.00450014	93
7.42735	0.00408264	0.00435739	93
7.4948	0.00414965	0.00478338	93
7.56227	0.00424448	0.00492399	93
7.6298	0.00423273	0.00498837	93
7.6973	0.00396602	0.00479449	93
7.76471	0.00380242	0.00458876	93
7.83219	0.00430537	0.00437186	93
7.89971	0.00433832	0.00400593	93
7.96717	0.00414321	0.00342955	93
8.03487	0.00396844	0.00346643	93
8.10222	0.00385055	0.00384392	93
8.16968	0.00383149	0.00388014	93
8.23732	0.00389515	0.00353226	93
8.30462	0.00409742	0.00371146	93
8.37232	0.00356413	0.00350411	93
8.43966	0.00402001	0.00333526	93
8.50722	0.00343065	0.00348796	93
8.57478	0.00378745	0.00358174	93
8.64215	0.00366891	0.00347675	93
8.70987	0.0036288	0.00395005	93
8.77722	0.00357572	0.00379659	93
8.84471	0.00361827	0.00404903	93
8.91229	0.00393173	0.00448321	93
8.97983	0.00425911	0.00485235	93
9.04734	0.00372622	0.00456122	93
9.11478	0.00377392	0.00425967	93
9.18221	0.0036022	0.00464472	93
9.24963	0.00390894	0.00464204	93
9.31711	0.0036339	0.00459059	93
9.38481	0.00387387	0.00447329	93
9.45217	0.003431	0.00411166	93
9.51981	0.00400098	0.00456829	93
9.58716	0.0296032	0.0181983	93
9.65465	0.278267	0.163775	93
9.7222	0.969074	0.392166	93
9.78983	1.47241	0.361553	93
9.85718	1.75605	0.407467	93
9.92478	1.99393	0.433226	93
9.99215	2.21082	0.425545	93
10.0598	2.33511	0.396781	93
10.1273	2.40271	0.385173	93
10.1947	2.43255	0.37693	93
10.2622	2.46166	0.386541	93
10.3299	2.49179	0.382056	93
10.3972	2.48898	0.380658	93
10.4647	2.51569	0.392525	93
10.5322	2.53658	0.390701	93
10.5997	2.52867	0.385874	93
10.6673	2.56098	0.398828	93
10.7347	2.56078	0.401204	93
10.8023	2.57621	0.400447	93
10.8697	2.58267	0.409158	93
10.9373	2.595	0.405474	93
11.0048	2.60478	0.397913	93

## Sheet: Fig.S2H
MMTV-PyMT WT				MMTV-PyMT BK-KO
ctrl	+ PAX	+ IBTX		ctrl	+ PAX	+ IBTX
0.20007	0.0589693	0.204006		0.107907	0.0665512	0.142946
0.19499	0.100172	0.123122		0.0955064	0.127712	0.105212
0.211237	0.0953676	0.0845766		0.150385	0.0598587	0.0916288
0.216522	0.0683044	0.10178		0.137535	0.0650855	0.0880236
0.263027	0.141324	0.133667		0.0894048	0.0726963	0.0641039
0.298088	0.0664395	0.0888891		0.0870309	0.0620831	0.11529
0.238874	0.087948	0.122714		0.0931332	0.068635	0.139081
0.140808	0.0562446	0.0958217		0.0513052	0.062707	0.0959113
0.195517	0.0909541	0.158957		0.0722415	0.137559	0.0822098
0.313472	0.0572534	0.163619		0.0827196	0.091894	0.100673
0.330714	0.0732216	0.10065		0.0904386	0.0788247	0.107602
0.273857	0.216573	0.123899		0.140212	0.114997	0.09015
0.220121	0.0725029	0.120842		0.092678	0.117445	0.103124
0.262693	0.134265	0.306744		0.109096	0.103079	0.103449
0.16004	0.0602611	0.245021		0.106394	0.0628905	0.120797
0.332218	0.049849	0.120603		0.126979	0.10647	0.116305
0.27619	0.0693216	0.0621397		0.129571	0.0753429	0.121117
0.247658	0.0743427	0.0813436		0.107358	0.0554741	0.0635462
0.30139	0.11246	0.0705733		0.172459	0.0598754	0.0382968
0.353006	0.0659666	0.0617326		0.140192	0.0943235	0.100781
0.274855	0.0889349	0.0976893		0.114069	0.079787	0.0601737
0.310633	0.088479	0.0777005		0.145238	0.0715099	0.0609891
0.197135	0.107388	0.0684552		0.149398	0.0988891	0.0714478
0.245235	0.0623784	0.105025		0.0559313	0.079145	0.0880121
0.176593	0.0672952	0.23941		0.058512	0.0916344	0.0771261
0.219509	0.0823465	0.34993		0.12636	0.117855	0.105052
0.265188	0.0624385	0.216334		0.149269	0.14043	0.10582
0.21552	0.0840691	0.354199		0.127262	0.113833	0.139191
0.309424	0.0461277	0.346589		0.181213	0.144109	0.209577
0.160317	0.0695379	0.16388		0.228267	0.0690294	0.119642
0.240658	0.0680016	0.160461		0.110557	0.11079	0.158637
0.234158	0.0600497	0.0802297		0.116329	0.0650156	0.192293
0.0366596	0.0625237	0.0607077		0.155615	0.120442	0.180751
0.0601266	0.100926	0.0684483		0.042004	0.0676675	0.130517
0.126852	0.0569957	0.106914		0.0943279	0.0732807	0.0859406
0.0474074	0.0607975	0.0648072		0.0983227	0.06741	0.110923
0.0610409	0.0557938	0.127925		0.131311	0.0587925	0.0902533
0.0915539	0.0482094	0.0752189		0.0937137	0.0682716	0.0678524
0.060233	0.0437532	0.0899597		0.0852995	0.0938299	0.107233
0.0625894	0.0432968	0.0647351		0.0588275	0.0744783	0.0869927
0.053368	0.0577731	0.272402		0.155817	0.0498221	0.173322
0.0733039	0.123185	0.0652729		0.10189	0.0540786	0.155703
0.0724224	0.0565745	0.105305		0.162567	0.0595699	0.143424
0.0802428	0.223348	0.11763		0.140964	0.0709903	0.145699
0.120704	0.0494099	0.115837		0.0988617	0.103905	0.100555
0.101156	0.0702199	0.0888775		0.10329	0.0869283	0.099654
0.105431	0.0757241	0.113411		0.112175	0.0695554	0.112729
0.0744511	0.0569093	0.174797		0.0959601	0.0851652	0.0582131
0.095603	0.0545113	0.117707		0.152365	0.0482638	0.0521884
0.0594189	0.0597196	0.130204		0.0821148	0.153784	0.0599942
0.0899669	0.117605	0.147827		0.0602296	0.10247	0.0808232
0.0562491	0.0565729	0.129804		0.0601892	0.0388128	0.0699723
0.0637165	0.101446	0.0889946		0.0787808	0.107096	0.0432919
0.0557651	0.0976633	0.195153		0.0497792	0.111844	0.056968
0.0727409	0.0749263	0.106883		0.0473328	0.153151	0.0645485
0.0799219	0.0701769	0.112536		0.0665469	0.151166	0.0511161
0.087673	0.0681828	0.141263		0.0513794	0.0931367	0.071326
0.0947904	0.08521	0.216232		0.0615742	0.111429	0.102245
0.0567369	0.0736147	0.318425		0.100323	0.126687	0.119198
0.0317116	0.0689673	0.269356		0.123801	0.148756	0.155476
0.115484	0.0659862	0.378		0.0953318	0.117469	0.123032
0.0818316	0.0698308	0.234715		0.0983202	0.0990074	0.115836
0.0557943	0.0706121	0.159117		0.093593	0.1008	0.146637
0.0497034	0.0837032	0.134737		0.0868268	0.0783091	0.12808
0.0978848	0.0997741	0.146672		0.097166	0.113439	0.0904914
0.10537	0.161884	0.400795		0.144711	0.102069	0.10572
0.0778206	0.163017	0.190564		0.100822	0.147155	0.172697
0.106499	0.096178	0.386808		0.0883238	0.103562	0.108711
0.0949321	0.0842647	0.511387		0.0547174	0.0998267	0.122518
0.0834634	0.082689	0.177726		0.098341	0.0826938	0.124374
0.243942	0.0523223	0.264599		0.134162	0.152934	0.0945177
0.293848	0.133716	0.159415		0.129206	0.130312	0.0884948
0.187404	0.197486	0.151606		0.103123	0.117543	0.0996467
0.205863	0.0585807	0.121276		0.0832982	0.123693	0.0812098
0.220826	0.0593429	0.101789		0.0864905	0.112929	0.0919752
0.221253	0.0786895	0.176054		0.146271	0.107941	0.1037
0.199736	0.0633231	0.155059		0.131856	0.0371516	0.0962666
0.217089	0.0602223	0.159433		0.116675	0.0347226	0.0985249
0.162889	0.0745846	0.0969199		0.108781	0.0339178	0.101984
0.165412	0.0741012	0.117751		0.19956	0.0405839	0.0921601
0.164362	0.0834442	0.665964		0.139916	0.173881	0.0964421
0.199053	0.130363	0.680897		0.0459534	0.142454	0.0756428
0.26906	0.0740014	0.318062		0.0298265	0.165604	0.0924579
0.241474	0.144788	0.410968		0.0323266	0.120797	0.0976878
0.172285	0.110589	0.331048		0.0383722	0.151602	0.0898339
0.188999	0.109297	0.267576		0.0354023	0.144609	0.0935346
0.237037	0.344564	0.0519638		0.0352171	0.163241	0.0675888
0.247276	0.150581	0.1245		0.0312783	0.0353028	0.0884571
0.176593	0.101194	0.157753		0.0256748	0.114442	0.0882272
0.13136	0.0971296	0.127519		0.0300041	0.0688283	0.148033
0.188339	0.0763198	0.113745		0.035934	0.089979	0.13676
0.103246	0.0683161	0.105588		0.0449644	0.0690771	0.109149
0.183287	0.179128	0.106936		0.0348628	0.0656975	0.100634
0.183569	0.100778	0.130816			0.0805226	0.0759035
0.166035	0.0692706	0.115834				0.0637488
0.113352	0.137524	0.124237				0.0705614
0.103908	0.0807367	0.0960989				0.0552929
0.0898508	0.297342	0.0745674				0.0672214
0.114589	0.0943787	0.125887				0.0876408
0.263432	0.118141	0.342618				0.0997934
0.0984808	0.0728614	0.156792				0.0757141
0.155564	0.0858053	0.120818				0.0940919
0.215294	0.13234	0.149279				0.0854879
0.184501	0.124839	0.0766787				0.0302614
0.227416	0.0755043	0.135373				0.0985116
0.178166	0.1034	0.13789				0.140746
0.217561	0.0751785	0.115204				0.136631
0.128783	0.157124	0.108211				0.173496
0.171585	0.175716	0.0806112				0.144818
	0.0650132	0.0654444				0.0867032
		0.124702				0.157433
		0.0970027
		0.102823
		0.0840888
		0.215382
		0.0980075
		0.095621
		0.139502
		0.172711
		0.131751
		0.105714
		0.105185
		0.154632

## Sheet: Fig.S2I
MDA-MB-453
ctrl	+ PAX	+ IBTX
0.113792	0.0203743	0.0914367
0.156929	0.0117176	0.123267
0.0908795	0.023284	0.122944
0.114758	0.0144972	0.0806551
0.11678	0.0507956	0.0556387
0.0909615	0.00706789	0.0473524
0.111443	0.00208077	0.0782894
0.123948	0.00785855	0.07064
0.173364	0.00585163	0.0709022
0.116843	0.00200253	0.0568118
0.120729	0.0393561	0.0470098
0.104017	0.0126444	0.118771
0.0919692	0.0088393	0.0810705
0.141007	0.0203694	0.0741687
0.130422	0.0177136	0.0802823
0.111038	0.0158356	0.0874951
0.120485	0.00142405	0.0864816
0.0827051	0.0139825	0.0722212
0.162523	0.00121587	0.0918749
0.125514	0.0255552	0.0531216
0.0977496	0.0221856	0.0831713
0.124077	0.0437634	0.0747922
0.0921226	0.0410268	0.107747
0.098287	0.0412565	0.0849778
0.135002	0.00248165	0.0682336
0.103725	0.0150698	0.0705035
0.0735145	0.0328172	0.0479501
0.132331	0.034942	0.0883988
0.0953116	0.0234859	0.0979632
0.129187	0.023848	0.0463374
0.147063	0.0196722	0.057669
0.148253	0.0540577	0.0536156
0.130148	0.0526842	0.0530078
0.0665103	0.00471727	0.0565698
0.0722022	0.0217693	0.033851
0.113834	0.0258175	0.0279305
0.105552	0.0383366	0.0553114
0.0649809	0.02598	0.0635038
0.106617	0.00267399	0.0609826
0.0943899	0.00267953	0.100572
0.0958689	0.0379184	0.0899681
0.1069	0.0227711	0.133737
0.147866	0.0197162	0.105496
0.0999483	0.0304383	0.111737
0.0781236	0.0318361	0.0724542
0.0995594	0.0265971	0.0856466
0.0839995	0.00291575	0.109173
0.0958159	0.00386035	0.0977537
0.0963458	0.0141948	0.107068
0.0921771	0.00431082	0.0956719
0.0677868	0.0187933	0.101407
0.0554732	0.00411511	0.113034
0.0918931	0.004923	0.0889712
0.122031	0.00325134	0.0924556
0.0639813	0.00403275	0.128704
0.0872427	0.00304652	0.08391
0.094914	0.0266986	0.0880036
0.0915504	0.0157578	0.137345
0.0804117	0.022646	0.0683984
0.112791	0.0406071	0.0845128
0.0907255	0.0765939	0.0769174
0.0724131	0.103522	0.0556866
0.0570623	0.107377	0.0636001
0.0722578	0.11124	0.0801663
0.0602032	0.0663351	0.0592128
0.0629683	0.097376	0.0989396
0.111637	0.094042	0.0719182
0.0686839	0.0832349	0.0793832
0.0978818	0.0546549	0.109118
0.0892491	0.0849248	0.0533995
0.080226	0.096429	0.0959844
0.119939	0.0821283	0.0841792
0.085935	0.0650374	0.0839706
0.105542	0.0758792	0.115857
0.0845328	0.0651332	0.06702
0.0824042	0.0838165	0.0947501
0.0665108	0.115983	0.0949544
0.0988046	0.08825	0.100452
0.0816909	0.126351	0.0674419
0.0930488	0.0967251	0.017256
0.0806306	0.113164	0.0116247
0.0740575	0.0938526	0.0261839
0.0847276	0.0814264	0.0147925
0.0829343	0.046608	0.0160206
0.133162	0.106467	0.0219107
0.0816419	0.0656801	0.0125136
0.0529963	0.0684344	-0.0002148
0.0591283	0.0745278	0.0293322
0.050553	0.0706007	0.022448
0.0413795	0.0521727	0.0057096
0.0630731	0.0762886	-0.00053462
0.0961759	0.0785213	0.00126624
0.0609967	0.0645004	0.0222092
0.0978836	0.0617334	0.0210069
0.0848093	0.109148	0.0149055
0.0848387	0.0776271	-0.00034388
0.0623419	0.104066	-0.00033743
0.0801423	0.0899362	0.0122786
0.0291696	0.0910396	0.0170026
0.115599	0.0776704	0.0132516
0.110111	0.0985834	0.00846118
	0.0853571	-0.00075012
	0.122553	0.0003374
	0.0824786	-5.6723e-05
	0.116145	0.00020423
	0.111469	0.00252961
	0.0996864	0.00964529
		-0.00110833
		0.0140454

## Sheet: Fig.S2J
MCF-7
ctrl	+ PAX	+ IBTX
0.0313133	-0.018296	0.0339545
0.0346231	0.0547141	0.0174236
0.051866	0.0564648	0.0266308
0.0336705	0.0389694	0.0692858
0.0257247	0.0394314	0.0142085
0.0540235	0.0306567	0.0209896
0.0298631	0.0491971	0.0445896
0.0661183	0.0218532	0.0110048
0.0519969	0.0799352	0.0432225
0.0355454	0.0733525	0.067652
0.0189723	0.089536	0.0569387
0.0265101	0.0939769	0.0612875
0.0275547	0.0874543	0.0420679
0.0129571	0.145276	0.0879003
0.0591274	0.0430111	0.0555963
0.0317497	0.0422017	0.0993971
0.0237429	0.0766225	0.0818914
0.0190521	0.00786706	0.0726834
0.00736499	0.031333	0.0768188
0.0148588	0.0119032	0.0571214
0.0124895	0.0610854	0.0520333
0.0134228	0.0934866	0.0921851
-0.034297	0.0472607	0.0533738
-0.00300046	0.0378671	0.0408802
0.0118971	0.0394507	0.0440835
-0.00829531	0.0214161	0.0468208
-0.0390626	0.11699	0.0482695
-0.0278642	0.0590116	0.129097
-0.0565859	0.151832	0.0405721
-0.0125191	0.0268897	0.0701444
0.00583274	0.0551344	0.0446492
0.00239848	0.134894	0.0647106
0.0285771	0.0282852	0.0642481
0.0278667	0.0843778	0.0357837
0.0278606		0.0339289
0.0250783		0.036298
0.0498141
0.0307078
0.042452
0.0255279
0.0486987
0.0388359
0.0370926
0.0507105
0.17953
0.0421213
0.0465391
0.0295676
0.0175372
0.0237782
0.0580577
0.0120607
0.018187

[truncated: 12 more sheets: Fig.S2K, Fig.S2L, Fig.S2M, Fig.S2N, Fig.S2O, Fig.S2P, Fig.S2Q, Fig.S2R, Fig.S2S, Fig.S2T, Fig.S2U, Fig.S2V]
