# Supplementary material for: mitoBKCa is functionally expressed in murine and human breast cancer cells and potentially contributes to metabolic reprogramming
Source: eLife. 2024 May 29;12:RP92511. doi: 10.7554/eLife.92511 (PMC11136494; doi:10.7554/eLife.92511)
Supplement: Figure 2—source data 1. [file elife-92511-fig2-data1.xlsx]

## Sheet: Fig.2A
										Basal ratios
	MMTV-PyMT WT				MMTV-PyMT BK-KO					WT				BK-KO
Time (min)	Average	SD	N (cells)		Average	SD	N (cells)			ctrl	+ PAX	+ IBTX		ctrl	+ PAX	+ IBTX
0	0.281741	0.0550739	784		0.241157	0.0336098	857			0.25829	0.275558	0.221787		0.235467	0.211856	0.233199
0.0501217	0.281634	0.0545915	784		0.241291	0.0331678	857			0.247282	0.275812	0.234737		0.240476	0.228575	0.24701
0.100088	0.281016	0.0541735	784		0.241205	0.0327666	857			0.247038	0.272487	0.281592		0.239787	0.238119	0.261838
0.150048	0.280187	0.0533212	784		0.241182	0.0323552	857			0.271468	0.266893	0.24842		0.226741	0.243784	0.231903
0.200153	0.279453	0.0526065	784		0.241303	0.0321034	857			0.300069	0.252321	0.263694		0.232116	0.201434	0.241757
0.250078	0.278722	0.0524205	784		0.241135	0.0317108	857			0.254374	0.236375	0.21973		0.226114	0.200813	0.235753
0.300157	0.278	0.0517516	784		0.240801	0.0311942	857			0.244814	0.239508	0.267802		0.240219	0.282612	0.236643
0.350123	0.277429	0.0516367	784		0.240963	0.0312833	857			0.255374	0.242165	0.241619		0.251551	0.263343	0.231504
0.400072	0.276772	0.0515844	784		0.241134	0.0334503	857			0.250188	0.279501	0.255774		0.215505	0.20464	0.24863
0.450043	0.276323	0.0516264	784		0.241056	0.0327383	857			0.301743	0.24812	0.287502		0.215136	0.22005	0.245112
0.500152	0.275811	0.0513674	784		0.241027	0.0320521	857			0.275993	0.251054	0.262782		0.243468	0.209336	0.243415
0.550037	0.275902	0.0513896	784		0.240743	0.0310987	857			0.303701	0.240072	0.256672		0.250252	0.220635	0.240819
0.600183	0.275456	0.0523514	784		0.24044	0.030594	857			0.250714	0.236091	0.274199		0.23303	0.231426	0.242435
0.650123	0.275043	0.0519794	784		0.240426	0.0304985	857			0.706616	0.251389	0.271399		0.256697	0.282197	0.237458
0.700082	0.274538	0.051389	784		0.240393	0.0302461	857			0.276212	0.243924	0.267856		0.243701	0.26517	0.227761
0.75008	0.274204	0.0516372	784		0.240391	0.0309985	857			0.250327	0.258196	0.280745		0.2355	0.243303	0.236025
0.800122	0.273944	0.0511614	784		0.240362	0.03095	857			0.221597	0.258843	0.261923		0.237881	0.22687	0.246481
0.850065	0.273538	0.0507163	784		0.240236	0.0305163	857			0.22038	0.255947	0.278106		0.240203	0.223128	0.240781
0.900163	0.273695	0.0510145	784		0.240312	0.0302661	857			0.224337	0.240123	0.238478		0.222435	0.218811	0.23561
0.950037	0.273543	0.0519408	784		0.240315	0.0302485	857			0.241559	0.260759	0.23414		0.234387	0.18278	0.232667
1.00017	0.272995	0.0516015	784		0.2405	0.0305132	857			0.236327	0.241671	0.22668		0.227047	0.257976	0.21686
1.05016	0.273093	0.0519683	784		0.240207	0.0304634	857			0.339952	0.266888	0.237148		0.248165	0.197571	0.228978
1.10013	0.273221	0.0531617	784		0.240039	0.0300725	857			0.304338	0.279507	0.249563		0.255449	0.19455	0.22727
1.15008	0.272641	0.0519919	784		0.240142	0.0296913	857			0.303578	0.263333	0.250563		0.265963	0.182161	0.235402
1.20015	0.272113	0.0507687	784		0.240179	0.0294665	857			0.293996	0.260289	0.225416		0.242116	0.202806	0.235869
1.25016	0.271972	0.0501499	784		0.240279	0.0292642	857			0.297893	0.272961	0.227562		0.215243	0.235323	0.23825
1.30004	0.271553	0.049891	784		0.240273	0.0296824	857			0.292037	0.259137	0.261563		0.241803	0.228222	0.23558
1.35003	0.271484	0.0497365	784		0.239986	0.0293547	857			0.243093	0.253081	0.236744		0.273571	0.236349	0.223499
1.40004	0.270777	0.0491499	784		0.240208	0.0288897	857			0.242681	0.256921	0.284003		0.224381	0.233728	0.224705
1.45009	0.270822	0.0492681	784		0.239847	0.028667	857			0.267688	0.246963	0.233479		0.222813	0.223096	0.238837
1.50004	0.270695	0.049554	784		0.239714	0.0286006	857			0.260236	0.260174	0.210889		0.22996	0.193855	0.248052
1.55017	0.270891	0.0498466	784		0.239815	0.0284876	857			0.302383	0.261173	0.274815		0.222314	0.204044	0.256122
1.60017	0.270785	0.0495795	784		0.239546	0.0282394	857			0.329074	0.270063	0.274989		0.217938	0.200339	0.255015
1.65015	0.270724	0.0496783	784		0.239891	0.0286421	857			0.290817	0.25232	0.273151		0.230368	0.198075	0.229797
1.70017	0.270552	0.049437	784		0.240122	0.029849	857			0.266939	0.239515	0.268795		0.231066	0.205214	0.248387
1.75012	0.270785	0.0493775	784		0.2399	0.0294497	857			0.242217	0.239175	0.279573		0.225303	0.214364	0.224107
1.80003	0.271113	0.0511868	784		0.240059	0.0285533	857			0.27606	0.24973	0.263005		0.21738	0.203092	0.23511
1.85005	0.271689	0.0523674	784		0.239945	0.0287157	857			0.266873	0.32615	0.245761		0.241835	0.264325	0.21686
1.90018	0.271748	0.0524499	784		0.240211	0.0285379	857			0.266599	0.217647	0.252905		0.236086	0.210033	0.216031
1.95011	0.271715	0.0520478	784		0.239726	0.028179	857			0.294166	0.214544	0.243305		0.21598	0.196034	0.220735
2.00005	0.271387	0.051356	784		0.23963	0.0280915	857			0.269402	0.21297	0.232317		0.207698	0.190711	0.223715
2.05016	0.271252	0.0510915	784		0.239858	0.0277278	857			0.256579	0.208255	0.273716		0.235467	0.192613	0.255535
2.10013	0.270853	0.0502035	784		0.239566	0.0280685	857			0.263825	0.222688	0.270032		0.240476	0.193573	0.229804
2.15019	0.270742	0.0494298	784		0.23979	0.0276562	857			0.235431	0.203326	0.259472		0.239787	0.197809	0.236447
2.20017	0.270648	0.0492072	784		0.239578	0.0275282	857			0.231477	0.207768	0.273074		0.226741	0.212275	0.239893
2.25005	0.27078	0.0499248	784		0.239579	0.0272882	857			0.239021	0.236538	0.242531		0.194981	0.18892	0.272537
2.30008	0.271085	0.0514447	784		0.239795	0.027496	857			0.255509	0.184973	0.276883		0.191124	0.192955	0.214278
2.35011	0.27124	0.050663	784		0.240077	0.0282083	857			0.254905	0.217532	0.253081		0.232116	0.201763	0.221801
2.40016	0.270796	0.0498408	784		0.23996	0.0280468	857			0.290788	0.199631	0.273983		0.226114	0.200599	0.23442
2.45018	0.270675	0.0492818	784		0.240565	0.0285268	857			0.232011	0.207287	0.28318		0.240219	0.220946	0.23622
2.50011	0.270597	0.0493412	784		0.240388	0.0280782	857			0.232549	0.248036	0.265918		0.251551	0.188709	0.233118
2.5501	0.270563	0.0491386	784		0.240401	0.0280366	857			0.241802	0.250292	0.255204		0.215505	0.195789	0.225234
2.60015	0.270436	0.0488736	784		0.24041	0.028174	857			0.227627	0.254248	0.245976		0.215136	0.194009	0.227194
2.65004	0.270493	0.0487384	784		0.240266	0.0281405	857			0.23328	0.295267	0.295003		0.243468	0.196473	0.230133
2.70015	0.270326	0.0489939	784		0.240254	0.0281889	857			0.235811	0.197576	0.269074		0.250252	0.202648	0.230018
2.75019	0.270439	0.0491603	784		0.240005	0.0284326	857			0.321345	0.255924	0.322194		0.23303	0.197731	0.22374
2.80017	0.270243	0.0487975	784		0.240434	0.0285388	857			0.262696	0.300744	0.329705		0.256697	0.194893	0.233593
2.85008	0.27038	0.0487375	784		0.240341	0.0294044	857			0.239737	0.231042	0.360293		0.243701	0.224554	0.230774
2.90003	0.270404	0.0487824	784		0.240163	0.0292898	857			0.240588	0.192298	0.27642		0.2355	0.199321	0.243237
2.95019	0.270682	0.0491135	784		0.240223	0.0286739	857			0.239304	0.197969	0.374665		0.237881	0.188372	0.252582
3.00008	0.270835	0.0496682	784		0.2402	0.0283202	857			0.224161	0.206092	0.434599		0.240203	0.196831	0.244106
3.05006	0.27097	0.0499482	784		0.239793	0.0279295	857			0.232024	0.207419	0.417044		0.222435	0.190115	0.2421
3.10016	0.27123	0.0504375	784		0.239949	0.0277836	857			0.247245	0.215306	0.391985		0.234387	0.25676	0.239163
3.15006	0.271445	0.0505142	784		0.239875	0.0279821	857			0.227043	0.219506	0.335718		0.227047	0.218662	0.21809
3.20011	0.271278	0.0503583	784		0.240217	0.0283658	857			0.229066	0.241826	0.323762		0.248165	0.20205	0.224724
3.25004	0.271132	0.0497878	784		0.240146	0.0285108	857			0.215672	0.204583	0.242878		0.255449	0.213649	0.220588
3.30004	0.270995	0.0491588	784		0.240137	0.0286639	857			0.231644	0.207318	0.269184		0.265963	0.191505	0.221702
3.35009	0.270872	0.0491209	784		0.240062	0.0289316	857			0.218281	0.204079	0.393499		0.242116	0.202616	0.226183
3.40017	0.270918	0.0486669	784		0.240061	0.0293129	857			0.237294	0.204258	0.418021		0.215243	0.210693	0.22449
3.45011	0.270835	0.0484789	784		0.240111	0.0286539	857			0.222022	0.235108	0.366857		0.241803	0.191648	0.239766
3.50014	0.270884	0.0492912	784		0.239896	0.0281928	857			0.278838	0.203131	0.293795		0.273571	0.198463	0.242335
3.55009	0.270911	0.0492074	784		0.239753	0.028134	857			0.220812	0.203164	0.294384		0.224381	0.188995	0.235854
3.60017	0.270479	0.0485621	784		0.239878	0.0279714	857			0.217693	0.207085	0.353566		0.222813	0.186114	0.24183
3.65013	0.270461	0.0477671	784		0.239803	0.0281437	857			0.249312	0.202292	0.259558		0.22996	0.200711	0.234863
3.70008	0.27047	0.0476584	784		0.239756	0.028159	857			0.226346	0.203066	0.297539		0.222314	0.184972	0.230264
3.75003	0.270726	0.0483548	784		0.239748	0.0284437	857			0.230936	0.200363	0.252238		0.217938	0.192962	0.231948
3.80004	0.27052	0.0481029	784		0.239916	0.0293479	857			0.236512	0.213876	0.250887		0.230368	0.20795	0.221286
3.85008	0.270523	0.0475872	784		0.239805	0.0293819	857			0.224711	0.209909	0.261023		0.231066	0.210267	0.223244
3.90017	0.270445	0.0469412	784		0.240558	0.029612	857			0.23601	0.200454	0.262994		0.225303	0.203229	0.22865
3.95014	0.270231	0.0468242	784		0.239982	0.0294406	857			0.216344	0.201225	0.284253		0.21738	0.220485	0.235723
4.00013	0.26996	0.0466524	784		0.239779	0.029245	857			0.23526	0.215725	0.282216		0.241835	0.207248	0.232321
4.05012	0.270191	0.0466894	784		0.239319	0.0293991	857			0.226397	0.215797	0.292812		0.236086	0.230691	0.243981
4.10013	0.270079	0.0469644	784		0.240436	0.0296378	857			0.239019	0.200617	0.310651		0.21598	0.231239	0.240709
4.15018	0.270309	0.0467926	784		0.240806	0.0321922	857			0.2343	0.261093	0.289793		0.207698	0.214365	0.241321
4.20015	0.270304	0.0468914	784		0.241249	0.0345961	857			0.225721	0.204844	0.290084		0.264614	0.205235	0.237011
4.25009	0.270521	0.0470676	784		0.241204	0.0387525	857			0.241976	0.20451	0.326114		0.251111	0.206789	0.232585
4.30012	0.270507	0.0471757	784		0.241572	0.0384625	857			0.203928	0.204555	0.453066		0.240707	0.244458	0.242609
4.35015	0.270336	0.0474154	784		0.241648	0.0361177	857			0.21367	0.205238	0.324155		0.198828	0.205849	0.229126
4.40016	0.271232	0.0490873	784		0.2421	0.0341233	857			0.200005	0.229502	0.298811		0.204286	0.205651	0.238498
4.45018	0.273126	0.056384	784		0.243328	0.0359349	857			0.204663	0.214666	0.4468		0.211902	0.180736	0.234897
4.50009	0.276599	0.0697194	784		0.247455	0.0573942	857			0.237609	0.216908	0.349397		0.23462	0.186449	0.236076
4.55016	0.276805	0.0668876	784		0.25322	0.0802266	857			0.248578	0.206666	0.335432		0.247297	0.205021	0.242599
4.60009	0.275285	0.0587203	784		0.255896	0.0916877	857			0.223184	0.213193	0.399549		0.282777	0.20883	0.233987
4.65003	0.274481	0.053552	784		0.253333	0.0773462	857			0.250889	0.194745	0.368559		0.289948	0.238182	0.296352
4.70011	0.273587	0.0513028	784		0.250637	0.0616923	857			0.236246	0.184161	0.307877		0.255708	0.208364	0.237554
4.75017	0.272787	0.0496417	784		0.247672	0.0492423	857			0.225268	0.209154	0.454952		0.193532	0.221359	0.229405
4.80006	0.272268	0.048194	784		0.247063	0.0465271	857			0.254264	0.192337	0.30483		0.243758	0.215205	0.24272
4.85007	0.271791	0.0473496	784		0.243867	0.0347122	857			0.236093	0.218475	0.285686		0.231397	0.194576	0.234357
4.90003	0.271422	0.0464691	784		0.242866	0.0317567	857			0.228151	0.199549	0.308912		0.228314	0.199278	0.229353
4.95011	0.271041	0.0460112	784		0.242218	0.0301531	857			0.23025	0.18906	0.306953		0.259008	0.238822	0.233105
5.00014	0.270673	0.0457352	784		0.24235	0.0304403	857			0.23644	0.210265	0.306826		0.257415	0.247167	0.224856
5.05013	0.270347	0.0454289	784		0.241356	0.0296608	857			0.227693	0.234318	0.258395		0.262589	0.273144	0.233243
5.10016	0.270054	0.0452929	784		0.240898	0.0289095	857			0.231643	0.211557	0.257872		0.299151	0.291729	0.231542
5.15003	0.26988	0.0454186	784		0.240737	0.0285351	857			0.221223	0.221975	0.379819		0.31115	0.240374	0.240344
5.20019	0.269841	0.0455731	784		0.240344	0.0280103	857			0.214284	0.215161	0.269279		0.268251	0.230404	0.260426
5.25017	0.270013	0.0459319	784		0.240311	0.0277626	857			0.234711	0.217856	0.353333		0.194423	0.251467	0.260455
5.30011	0.269869	0.0459726	784		0.24032	0.0280086	857			0.225785	0.212227	0.32127		0.190767	0.268461	0.235632
5.35012	0.270181	0.0460503	784		0.242319	0.0318311	857			0.223177	0.21876	0.362421		0.201974	0.434972	0.243871
5.40004	0.298458	0.139678	784		0.29264	0.205535	857			0.262289	0.215569	0.350057		0.204977	0.325348	0.240688
5.45005	0.379276	0.285117	784		0.344862	0.297846	857			0.197547	0.205001	0.398097		0.201276	0.276878	0.23802
5.50016	0.44366	0.34305	784		0.412536	0.340408	857			0.200702	0.197438	0.306868		0.219082	0.259559	0.243832
5.55007	0.4903	0.352954	784		0.466619	0.394035	857			0.201141	0.196894	0.274873		0.217082	0.338546	0.224958
5.60008	0.587717	0.389467	784		0.474405	0.379847	857			0.208399	0.213877	0.342608		0.21795	0.346041	0.236548
5.65012	0.608731	0.373426	784		0.482418	0.360649	857			0.197534	0.22324	0.299251		0.250018	0.418175	0.235379
5.7001	0.600463	0.33384	784		0.509718	0.35928	857			0.199179	0.218301	0.274698		0.359662	0.367657	0.239738
5.75016	0.661839	0.321609	784		0.530473	0.352036	857			0.20446	0.213569	0.424091		0.331049	0.447586	0.242905
5.80007	0.656735	0.304541	784		0.553344	0.344539	857			0.212212	0.204371	0.367132		0.310939	0.347085	0.266551
5.85014	0.648471	0.295255	784		0.581509	0.339774	857			0.243403	0.199138	0.420336		0.287546	0.369038	0.245973
5.90006	0.643584	0.286721	784		0.624016	0.3388	857			0.268588	0.213511	0.3969		0.199069	0.429596	0.261494
5.95007	0.644317	0.281153	784		0.657438	0.337863	857			0.262369	0.184639	0.347201		0.219876	0.303027	0.26474
6.00009	0.647909	0.277804	784		0.677035	0.336372	857			0.243039	0.219507	0.323773		0.207459	0.271659	0.237891
6.05015	0.650061	0.274841	784		0.68884	0.335066	857			0.220694	0.274528	0.30232		0.224573	0.308892	0.258643
6.10015	0.650979	0.274073	784		0.693984	0.335925	857			0.218653	0.28472	0.264904		0.230452	0.256988	0.258811
6.15003	0.648785	0.270738	784		0.692519	0.332064	857			0.210217	0.282421	0.349873		0.274835	0.266942	0.229931
6.20006	0.644142	0.266093	784		0.69134	0.32814	857			0.197116	0.277612	0.33261		0.315532	0.254203	0.245548
6.25013	0.639651	0.261121	784		0.689876	0.326661	857			0.216234	0.250257	0.28606		0.298786	0.225935	0.243069
6.30018	0.634673	0.258222	784		0.686839	0.324839	857			0.210346	0.254929	0.404246		0.229895	0.325548	0.250752
6.35008	0.628365	0.253744	784		0.683343	0.320802	857			0.217757	0.252984	0.238302		0.300068	0.259765	0.24308
6.40003	0.623573	0.25077	784		0.674685	0.315264	857			0.249242	0.279414	0.244143		0.20812	0.244967	0.28934
6.45009	0.617862	0.246965	784		0.670169	0.313499	857			0.248383	0.276732	0.24494		0.229456	0.258333	0.251538
6.50016	0.641388	0.241312	784		0.656999	0.304958	857			0.209816	0.278086	0.232961		0.330469	0.245328	0.250028
6.55008	0.640124	0.241955	784		0.648079	0.300694	857			0.201958	0.276859	0.239672		0.230159	0.235204	0.265459
6.60011	0.628472	0.233162	784		0.639139	0.297246	857			0.208409	0.282376	0.236176		0.367015	0.245555	0.257493
6.65007	0.617594	0.226641	784		0.628756	0.291475	857			0.227623	0.290087	0.228919		0.199036	0.266071	0.24226
6.70012	0.608583	0.220953	784		0.618378	0.283541	857			0.225102	0.280798	0.227188		0.190034	0.245041	0.245353
6.75009	0.600177	0.21693	784		0.608206	0.277207	857			0.208195	0.283432	0.225526		0.193079	0.250599	0.244849
6.80013	0.59312	0.214143	784		0.597646	0.271099	857			0.212379	0.265321	0.232791		0.190158	0.237709	0.252233
6.85013	0.586201	0.21088	784		0.588475	0.266351	857			0.22366	0.275125	0.235833		0.19199	0.251675	0.244796
6.90004	0.580033	0.209315	784		0.577347	0.260159	857			0.243509	0.301906	0.233184		0.198653	0.247079	0.25712
6.95005	0.573806	0.207252	784		0.566841	0.254665	857			0.276387	0.282628	0.234485		0.194316	0.231713	0.230674
7.00009	0.56776	0.204841	784		0.556413	0.249158	857			0.244244	0.318473	0.220282		0.195021	0.253028	0.232465
7.05008	0.56121	0.202682	784		0.546604	0.244706	857			0.250855	0.283017	0.21418		0.19362	0.248093	0.25758
7.10014	0.555169	0.201755	784		0.536536	0.240569	857			0.230338	0.339185	0.218768		0.188731	0.268526	0.239173
7.15018	0.549017	0.200203	784		0.52855	0.237229	857			0.251331	0.326025	0.22316		0.188156	0.277876	0.237857
7.20017	0.543004	0.198119	784		0.520106	0.233413	857			0.285759	0.261816	0.2209		0.187917	0.381391	0.231835
7.25019	0.536932	0.196721	784		0.51194	0.230107	857			0.275172	0.270994	0.222007		0.192563	0.250973	0.234903
7.30007	0.531017	0.19602	784		0.503611	0.226496	857			0.262491	0.294046	0.222898		0.205751	0.231731	0.244922
7.35012	0.52472	0.194612	784		0.495606	0.223542	857			0.259265	0.285723	0.219797		0.197707	0.269262	0.245487
7.40015	0.5193	0.193186	784		0.488386	0.2209	857			0.291683	0.269253	0.22355		0.190953	0.251497	0.231927
7.45018	0.513935	0.191629	784		0.481747	0.217505	857			0.31351	0.273821	0.21778		0.206231	0.239083	0.25749
7.50009	0.508688	0.190886	784		0.474646	0.213727	857			0.277178	0.281065	0.216715		0.195052	0.248476	0.241884
7.55019	0.502393	0.189425	784		0.468083	0.209596	857			0.282471	0.263482	0.217974		0.202032	0.253948	0.243354
7.60016	0.497411	0.188261	784		0.462416	0.206813	857			0.274886	0.27878	0.224817		0.212856	0.243393	0.252912
7.65011	0.491839	0.185742	784		0.457318	0.204463	857			0.293041	0.283447	0.230033		0.196017	0.249638	0.273803
7.70009	0.487532	0.184718	784		0.451246	0.20171	857			0.290822	0.287097	0.223714		0.195456	0.235242	0.241789
7.75009	0.483348	0.183749	784		0.444463	0.198558	857			0.294248	0.28862	0.221376		0.199069	0.283535	0.248923
7.80014	0.479152	0.182022	784		0.439658	0.196331	857			0.282733	0.284075	0.225876		0.195855	0.234387	0.250598
7.85005	0.475311	0.180502	784		0.434391	0.193525	857			0.273351	0.27935	0.236292		0.185154	0.2904	0.25794
7.90006	0.470703	0.178294	784		0.429213	0.189884	857			0.281329	0.273424	0.234742		0.202753	0.276285	0.246331
7.95003	0.465658	0.17556	784		0.423292	0.186146	857			0.328499	0.300296	0.227879		0.20283	0.269783	0.236466
8.00015	0.461093	0.173822	784		0.418785	0.183775	857			0.249163	0.270484	0.223742		0.199897	0.251128	0.234137
8.0501	0.456662	0.171642	784		0.413908	0.180866	857			0.245103	0.267236	0.220054		0.203449	0.262998	0.236042
8.10005	0.452655	0.169601	784		0.40939	0.178416	857			0.254859	0.290567	0.235209		0.191227	0.374034	0.238765
8.15015	0.449184	0.168207	784		0.40456	0.17609	857			0.256916	0.284413	0.239531		0.195496	0.251895	0.246524
8.20017	0.445118	0.165919	784		0.400216	0.173546	857			0.256091	0.284269	0.231618		0.199059	0.283942	0.237305
8.25014	0.441877	0.163827	784		0.395704	0.171019	857			0.257597	0.297792	0.230071		0.195874	0.301266	0.242319
8.30005	0.438312	0.161777	784		0.391764	0.168939	857			0.252635	0.299638	0.226604		0.235935	0.332929	0.265237
8.3501	0.434206	0.159813	784		0.387406	0.166893	857			0.261129	0.28334	0.225973		0.195434	0.262636	0.259716
8.40014	0.429968	0.157258	784		0.382903	0.164121	857			0.26023	0.2754	0.234674		0.192715	0.239566	0.276529
8.45019	0.42644	0.155176	784		0.379439	0.161944	857			0.249043	0.28356	0.231519		0.192442	0.246064	0.252157
8.50016	0.423054	0.153119	784		0.375477	0.159933	857			0.251891	0.273114	0.226903		0.199017	0.318582	0.235893
8.55007	0.419421	0.150594	784		0.371448	0.158179	857			0.256634	0.289865	0.228311		0.197859	0.255838	0.240161
8.60003	0.416127	0.148706	784		0.368484	0.156492	857			0.265937	0.298303	0.22642		0.191298	0.290317	0.242584
8.65005	0.413291	0.146256	784		0.36551	0.155075	857			0.257967	0.235852	0.224229		0.189149	0.277593	0.227992
8.70007	0.410446	0.144584	784		0.362059	0.152521	857			0.243406	0.233015	0.227218		0.194432	0.269398	0.24217
8.75016	0.407787	0.143046	784		0.359346	0.15079	857			0.265358	0.26556	0.230114		0.212041	0.235986	0.247017
8.80011	0.404817	0.140568	784		0.356332	0.148919	857			0.249744	0.247394	0.236195		0.194732	0.254032	0.232737
8.85008	0.401706	0.138509	784		0.353449	0.147149	857			0.246343	0.229641	0.231		0.200411	0.247691	0.236604
8.90006	0.399822	0.136886	784		0.350992	0.145695	857			0.269408	0.241785	0.225159		0.196344	0.255846	0.244334
8.95008	0.396891	0.135387	784		0.348359	0.144206	857			0.258256	0.236992	0.233265		0.196939	0.248685	0.242132
9.00003	0.394511	0.133354	784		0.346041	0.141879	857			0.273776	0.237207	0.220667		0.197839	0.249397	0.24756
9.05019	0.391891	0.131158	784		0.344194	0.140602	857			0.237951	0.245294	0.22736		0.190484	0.240182	0.249267
9.10019	0.389402	0.129318	784		0.341849	0.138521	857			0.250125	0.25213	0.239478		0.189858	0.250833	0.256513
9.15017	0.387123	0.127709	784		0.339347	0.136823	857			0.259087	0.245807	0.243965		0.196847	0.261206	0.244771
9.20025	0.384662	0.126061	784		0.337801	0.135346	857			0.241618	0.247696	0.238844		0.243337	0.24029	0.257323
9.25012	0.382885	0.124862	784		0.335772	0.134174	857			0.252966	0.241795	0.227977		0.228107	0.24264	0.266868
9.30016	0.380664	0.123621	784		0.33466	0.133688	857			0.259999	0.249296	0.236117		0.217176	0.258712	0.258452
9.35017	0.378681	0.121652	784		0.332136	0.131358	857			0.25639	0.242183	0.236898		0.21933	0.252401	0.242533
9.40009	0.376584	0.120295	784		0.330387	0.130065	857			0.273545	0.245769	0.235884		0.233232	0.252397	0.242031
9.45014	0.374807	0.119156	784		0.328798	0.128139	857			0.259783	0.230414	0.234681		0.222342	0.237723	0.246296
9.50011	0.37289	0.118057	784		0.327155	0.127104	857			0.27755	0.249745	0.225249		0.23586	0.256559	0.258846
9.55023	0.371207	0.116761	784		0.325764	0.125368	857			0.259439	0.243113	0.21781		0.233753	0.261001	0.242842
9.6002	0.369609	0.115528	784		0.324737	0.124696	857			0.267266	0.243047	0.24782		0.242952	0.249141	0.242455
9.65012	0.36803	0.11446	784		0.323232	0.123153	857			0.29166	0.248763	0.247032		0.225454	0.24087	0.236642
9.70016	0.366574	0.113314	784		0.321599	0.121486	857			0.263408	0.23693	0.250681		0.220982	0.239872	0.235777
9.75015	0.365116	0.112188	784		0.320565	0.12055	857			0.245565	0.244398	0.243252		0.207349	0.249717	0.251931
9.80006	0.363463	0.111075	784		0.319391	0.119144	857			0.259304	0.244383	0.255803		0.199221	0.243822	0.243927
9.85003	0.361592	0.109912	784		0.318379	0.117946	857			0.267125	0.246105	0.253892		0.193816	0.246102	0.253654
9.90008	0.35986	0.109047	784		0.317217	0.116686	857			0.26073	0.245355	0.25052		0.191012	0.247626	0.238533
9.95017	0.358399	0.107994	784		0.316128	0.115093	857			0.264413	0.235195	0.260241		0.253521	0.249321	0.229745
10	0.357151	0.107012	784		0.315086	0.11378	857			0.273978	0.228221	0.264877		0.219812	0.229901	0.242748
10.0501	0.355798	0.105782	784		0.314073	0.112878	857			0.318392	0.239641	0.256997		0.223936	0.22989	0.234483
10.1002	0.354602	0.104876	784		0.311542	0.111278	857			0.241502	0.248305	0.268842		0.228047	0.236031	0.226452
10.1501	0.353405	0.104104	784		0.311657	0.10997	857			0.2518	0.242287	0.250226		0.23028	0.243663	0.2246
10.2	0.352201	0.103107	784		0.310579	0.108513	857			0.268024	0.249215	0.249213		0.230801	0.240355	0.244637
10.2501	0.351178	0.101726	784		0.309181	0.107124	857			0.237248	0.271137	0.257877		0.247502	0.251032	0.2517
10.3001	0.350022	0.101163	784		0.307903	0.105872	857			0.237919	0.259045	0.280704		0.226731	0.246214	0.237424
10.3501	0.349018	0.100029	784		0.306971	0.104789	857			0.234416	0.279932	0.277459		0.205917	0.249044	0.242957
10.4001	0.347967	0.0992514	784		0.305896	0.103707	857			0.229628	0.241141	0.278755		0.234289	0.251631	0.231729
10.4501	0.346983	0.0984936	784		0.305004	0.102035	857			0.218053	0.233608	0.264973		0.242091	0.260152	0.250481
10.5001	0.346119	0.0976959	784		0.302885	0.0997548	857			0.236331	0.227135	0.246223		0.213978	0.253482	0.250044
10.5501	0.345552	0.0970707	784		0.30303	0.0994919	857			0.236423	0.237481	0.244216		0.238266	0.246416	0.226717
10.6	0.34496	0.0964397	784		0.301379	0.0985528	857			0.230461	0.254063	0.237694		0.246082	0.246149	0.240544
10.6501	0.343473	0.0953882	784		0.300038	0.0972521	857			0.23712	0.239246	0.24402		0.221665	0.245165	0.247187
10.7002	0.342153	0.0943373	784		0.298155	0.0962753	857			0.236705	0.264159	0.245929		0.222742	0.247546	0.246002
10.75	0.340586	0.0928035	784		0.296848	0.0954736	857			0.243674	0.245308	0.262188		0.219406	0.249415	0.251805
10.8002	0.338576	0.0917962	784		0.295114	0.094978	857			0.221364	0.254599	0.243348		0.29149	0.274797	0.246935
10.8501	0.33666	0.090444	784		0.293523	0.0943978	857			0.213201	0.240004	0.258894		0.282922	0.264472	0.254731
10.9002	0.334858	0.0899498	784		0.290948	0.0930497	857			0.213388	0.248588	0.257305		0.2055	0.313788	0.238596
10.9502	0.333801	0.0893685	784		0.288933	0.0916214	857			0.226123	0.255792	0.245482		0.206978	0.302435	0.247927
11.0001	0.332184	0.0885628	784		0.286966	0.0896064	857			0.226321	0.237784	0.252303		0.21945	0.334896	0.240403
11.0501	0.33101	0.0879494	784		0.285426	0.0884681	857			0.238843	0.232745	0.251025		0.215165	0.240982	0.227443
11.1002	0.329332	0.0870135	784		0.283545	0.0870818	857			0.238203	0.238257	0.252357		0.231851	0.246167	0.223297
11.15	0.328226	0.0861185	784		0.281981	0.085251	857			0.225683	0.248482	0.262963		0.232302	0.259689	0.242669
11.2001	0.326792	0.0850555	784		0.281857	0.0855689	857			0.218283	0.243758	0.248201		0.249762	0.253708	0.238581
11.25	0.325207	0.0836278	784		0.278361	0.081328	857			0.281432	0.25517	0.253025		0.228972	0.250377	0.230547
11.3001	0.323429	0.0821654	784		0.277027	0.0795435	857			0.30977	0.268142	0.259954		0.21734	0.257267	0.231738
11.35	0.321704	0.0806689	784		0.275337	0.0776917	857			0.295855	0.255097	0.259074		0.225557	0.248139	0.232243
11.4002	0.319555	0.078967	784		0.273641	0.0752074	857			0.273617	0.258864	0.245203		0.217445	0.254086	0.227108
11.4502	0.317208	0.0769498	784		0.272455	0.0732367	857			0.274981	0.23999	0.251866		0.221249	0.244983	0.25519
11.5001	0.314628	0.0749884	784		0.270698	0.0713752	857			0.26049	0.235956	0.250779		0.234258	0.241376	0.26246
11.5502	0.312271	0.0726834	784		0.269366	0.0695095	857			0.26548	0.241517	0.236495		0.2202	0.240334	0.270145
11.6001	0.309657	0.0705502	784		0.268382	0.0678257	857			0.261482	0.256777	0.239509		0.235307	0.247352	0.260786
11.6501	0.307508	0.0686298	784		0.266831	0.0657788	857			0.290877	0.231501	0.239983		0.23148	0.247599	0.250043
11.7002	0.305733	0.0674653	784		0.265615	0.063959	857			0.338241	0.234817	0.25892		0.264174	0.246138	0.248959
11.7501	0.304316	0.0660014	784		0.263949	0.0614676	857			0.387172	0.237087	0.257168		0.262897	0.25348	0.246754
11.8001	0.303249	0.065001	784		0.262587	0.0598125	857			0.353464	0.261017	0.250648		0.21875	0.26591	0.234707
11.85	0.302242	0.0641615	784		0.261162	0.0579578	857			0.313639	0.25813	0.252571		0.24636	0.256305	0.226721
11.9001	0.301486	0.0633445	784		0.259875	0.055905	857			0.319879	0.244111	0.249774		0.248562	0.254333	0.222085
11.9501	0.300832	0.0628357	784		0.258485	0.0541212	857			0.272838	0.244589	0.25008		0.212226	0.252958	0.261206
12.0001	0.299913	0.0621008	784		0.257477	0.0522599	857			0.255676	0.221131	0.248969		0.23867	0.255063	0.223641
12.0501	0.299251	0.0615811	784		0.256712	0.0510932	857			0.34381	0.253571	0.244527		0.264663	0.255595	0.245822
12.1002	0.299047	0.0610345	784		0.256359	0.0510844	857			0.343457	0.257572	0.267149		0.228734	0.213376	0.249136
12.1502	0.298708	0.0605458	784		0.255543	0.0498358	857			0.252633	0.265753	0.256502		0.236152	0.244828	0.224058
12.2002	0.298006	0.0599115	784		0.254941	0.0491012	857			0.304623	0.234695	0.271276		0.256973	0.235305	0.240224
12.2501	0.297477	0.0594863	784		0.254203	0.0487523	857			0.271832	0.243706	0.284151		0.215838	0.262769	0.240124
12.3001	0.297333	0.0589227	784		0.253083	0.0470711	857			0.277295	0.256456	0.252853		0.234857	0.249842	0.227476
12.3501	0.297072	0.0587741	784		0.252686	0.0452598	857			0.307446	0.248398	0.311132		0.258403	0.262537	0.247489
12.4001	0.2968	0.0583262	784		0.251211	0.0431263	857			0.265659	0.236122	0.244059		0.234276	0.263706	0.235296
12.4501	0.296172	0.057813	784		0.25143	0.043922	857			0.303351	0.261319	0.252212		0.232547	0.25442	0.247219
12.5002	0.296134	0.0576351	784		0.250788	0.0434327	857			0.332546	0.267375	0.243557		0.231144	0.251851	0.246005
12.5501	0.295645	0.0572525	784		0.25016	0.0415323	857			0.268905	0.254994	0.272884		0.274174	0.247345	0.282482
12.6001	0.295186	0.0568977	784		0.249392	0.0400968	857			0.282056	0.268098	0.271777		0.265822	0.22285	0.270664
12.6501	0.294765	0.056646	784		0.24879	0.0389711	857			0.334802	0.227715	0.241845		0.267267	0.23913	0.243159
12.7001	0.294065	0.0560107	784		0.248271	0.0379865	857			0.268027	0.226653	0.294712		0.242198	0.231574	0.241403
12.7501	0.293511	0.0555144	784		0.247624	0.0370514	857			0.29388	0.238242	0.284101		0.259138	0.236256	0.240302
12.8001	0.292743	0.0550379	784		0.247309	0.0364338	857			0.319831	0.234166	0.26516		0.229761	0.244001	0.259555
12.8501	0.292135	0.0545394	784		0.246793	0.0358731	857			0.237214	0.232809	0.265328		0.270651	0.238872	0.253456
12.9002	0.291496	0.0541282	784		0.246642	0.0355157	857			0.306546	0.24032	0.309636		0.263284	0.250454	0.312366
12.9501	0.291078	0.0537189	784		0.246181	0.0350808	857			0.259093	0.235317	0.267599		0.2598	0.263704	0.248343
13.0001	0.29059	0.0533235	784		0.245919	0.0343725	857			0.295297	0.252459	0.264066		0.247542	0.239917	0.234397
13.0501	0.289835	0.0529531	784		0.245434	0.0338957	857			0.28386	0.237177	0.262719		0.252003	0.243397	0.22583
13.1002	0.289279	0.0525795	784		0.245231	0.033456	857			0.371784	0.238881	0.270292		0.249243	0.23363	0.251046
13.1501	0.288736	0.0522381	784		0.244876	0.032666	857			0.268423	0.245776	0.277347		0.253831	0.240235	0.248838
13.2002	0.288073	0.0516718	784		0.242561	0.0313727	857			0.301807	0.262385	0.273513		0.244939	0.235661	0.238181
13.2502	0.287609	0.051387	784		0.244445	0.0316722	857			0.325543	0.261517	0.262725		0.24582	0.23458	0.255413
13.3001	0.287356	0.0510402	784		0.244057	0.0311707	857			0.309292	0.243366	0.246155		0.233517	0.227279	0.248556
13.3502	0.286699	0.0508405	784		0.24379	0.0307701	857			0.310908	0.248057	0.243718		0.23254	0.241998	0.268615
13.4	0.286244	0.0505092	784		0.243634	0.0303922	857			0.328827	0.244104	0.239419		0.221503	0.24033	0.267742
13.4501	0.285832	0.0502747	784		0.243461	0.0299681	857			0.362263	0.254365	0.238972		0.276156	0.251772	0.258175
13.5001	0.285133	0.0497864	784		0.243619	0.0302488	857			0.373454	0.253117	0.240334		0.282574	0.23415	0.25993
13.5501	0.284422	0.0495428	784		0.242983	0.0299943	857			0.298313	0.24994	0.284652		0.267446	0.218753	0.242335
13.6001	0.283916	0.0489542	784		0.242933	0.0307439	857			0.373671	0.255867	0.266593		0.264868	0.243567	0.24341
13.6502	0.283488	0.0488469	784		0.242872	0.0301585	857			0.420532	0.266396	0.257441		0.304594	0.259543	0.245538
13.7001	0.282952	0.0486189	784		0.242673	0.0296144	857			0.415458	0.264142	0.27117		0.267786	0.28455	0.253227
13.7501	0.282423	0.0482783	784		0.242062	0.0291101	857			0.398703	0.247988	0.255453		0.276155	0.277005	0.256181
13.8002	0.282069	0.047974	784		0.242444	0.0288616	857			0.374577	0.288801	0.241842		0.226102	0.240797	0.292033
13.8501	0.281501	0.0476081	784		0.242069	0.0286875	857			0.391122	0.247837	0.302813		0.254876	0.239176	0.242929
13.9	0.281183	0.04748	784		0.24167	0.0284016	857			0.356565	0.250873	0.319296		0.249524	0.247886	0.253685
13.9501	0.281216	0.0476405	784		0.241533	0.0281542	857			0.369177	0.247841	0.249463		0.243296	0.244072	0.250281
14.0001	0.280974	0.048042	784		0.241427	0.0279375	857			0.385257	0.234697	0.28387		0.255564	0.179645	0.252057
14.05	0.280701	0.0477199	784		0.241276	0.0279736	857			0.303229	0.235908	0.275843		0.292627	0.22973	0.247757
14.1001	0.280213	0.0473672	784		0.241217	0.0277606	857			0.310889	0.259597	0.239136		0.281932	0.24378	0.245817
14.1501	0.279749	0.0470994	784		0.240858	0.0277056	857			0.280722	0.218105	0.256658		0.251655	0.237736	0.231025
14.2001	0.279289	0.047054	784		0.2409	0.0275254	857			0.320287	0.220734	0.258446		0.224987	0.265936	0.236664
14.2501	0.279222	0.0469269	784		0.240952	0.0274507	857			0.334137	0.220537	0.268088		0.220388	0.243565	0.238147
14.3002	0.278389	0.0467037	784		0.240532	0.0270283	857			0.36554	0.225472	0.275017		0.225376	0.241172	0.239573
14.3502	0.278366	0.0466305	784		0.240399	0.0269249	857			0.443108	0.21725	0.274463		0.257479	0.240665	0.235572
14.4001	0.278174	0.0463836	784		0.24037	0.0266852	857			0.374675	0.218026	0.304212		0.2304	0.236081	0.235716
14.4501	0.277831	0.0465106	784		0.240461	0.0267712	857			0.360332	0.269865	0.354858		0.229906	0.258214	0.248972
14.5001	0.277491	0.0461911	784		0.240387	0.0266333	857			0.327074	0.250407	0.290391		0.241398	0.252122	0.242496
14.5501	0.277053	0.0458887	784		0.240051	0.0264551	857			0.331375	0.231774	0.308023		0.266514	0.244521	0.243985
14.6	0.276851	0.0459144	784		0.240199	0.0262209	857			0.404728	0.283566	0.280873		0.245825	0.230922	0.232816
14.6502	0.276756	0.0458473	784		0.239994	0.0261062	857			0.364266	0.264168	0.285843		0.22744	0.253063	0.226502
14.7001	0.276476	0.0457402	784		0.240066	0.0262863	857			0.329181	0.236301	0.252619		0.234837	0.260411	0.232465
14.7502	0.2763	0.0454902	784		0.239642	0.0258921	857			0.377877	0.244259	0.24532		0.247915	0.230286	0.232796
14.8001	0.276339	0.0453642	784		0.239977	0.0262042	857			0.364306	0.239876	0.24825		0.198159	0.239259	0.233137
14.85	0.275909	0.0452502	784		0.239776	0.0260579	857			0.393022	0.26247	0.230717		0.22609	0.277291	0.240258
14.9001	0.275631	0.0451254	784		0.239944	0.0264075	857			0.406016	0.258991	0.242119		0.22543	0.259941	0.257616
14.95	0.275522	0.0449807	784		0.24023	0.0264696	857			0.395392	0.244868	0.236184		0.237186	0.269462	0.255265
										0.391742		0.231185		0.231183		0.246896
										0.390493		0.276441		0.229497		0.263043
										0.389551		0.284554		0.231201		0.268745
										0.314668		0.26896		0.239193		0.254156
										0.363886		0.269552		0.245892
										0.387051		0.324589		0.224721
										0.350098		0.278392		0.250255
										0.301271		0.295552		0.231706
										0.368068		0.303006		0.24249
										0.355644		0.252261		0.245612
										0.333106		0.236579		0.233247
										0.54588		0.240358		0.243865
										0.382149		0.248063		0.259896
										0.376429		0.306977		0.245751
										0.398722		0.246795		0.276172
										0.397337		0.281806		0.255811
										0.461452		0.252337		0.260629
										0.34655		0.282041		0.210848
										0.351033				0.226772
										0.312448				0.229967
										0.332076				0.222718
										0.29944				0.241121
										0.289004				0.24081
										0.256991				0.228793
										0.263189				0.229159
										0.26156				0.222763
										0.246541				0.232159
										0.273936				0.232263
										0.30436				0.234643
										0.255246				0.239492
										0.267156				0.234446
										0.240903				0.231019
										0.278235				0.250523
										0.245287				0.239677
										0.259261				0.235555
										0.264146				0.228984
										0.286991				0.244292
										0.268641				0.224769
										0.254848				0.220697
										0.288149				0.216503
										0.24199				0.23398
										0.231844				0.239283
										0.270835				0.237989
										0.242784				0.249034
										0.33778				0.233698
										0.255247				0.220505
										0.308366				0.208373
										0.271765				0.227617
										0.242911				0.220347
										0.237552				0.222219
										0.24066				0.24416
										0.248979				0.229208
										0.236685				0.241435
										0.258844				0.214583
										0.265907				0.219109
										0.242872				0.224866
										0.260029				0.223442
										0.269819				0.221196
										0.248446				0.257499
										0.256193				0.308562
										0.257285				0.252097
										0.270947				0.237451
										0.272885				0.241724
										0.268692				0.238908
										0.252332				0.271506
										0.259574				0.243429
										0.24678				0.279046
										0.275605				0.245086
										0.259579				0.245597
										0.253693				0.265152
										0.267696				0.206098
										0.274374				0.221625
										0.255583				0.215091
										0.251833				0.212381
										0.254103				0.225399
										0.27045				0.23798
										0.255028				0.238063
										0.256436				0.253208
										0.264382				0.262359
										0.232647				0.238881
										0.248648				0.256666
										0.266708				0.229297
										0.28801				0.248577
										0.273651				0.243946
										0.279803				0.226582
										0.252532				0.222151
										0.249044				0.219623
										0.255269				0.227763
										0.239181				0.227035
										0.235007				0.201554
										0.242158				0.250709
										0.239134				0.263879
										0.29298				0.5002
										0.228264				0.397603
										0.252701				0.402751
										0.270428				0.313068
										0.283682				0.244935
										0.263384				0.267912
										0.254553				0.25725
										0.257751				0.242455
										0.292597				0.238236
										0.254028				0.2534
										0.24871				0.232475
										0.236278				0.229106
										0.233172				0.239104
										0.265192				0.409932
										0.243777				0.321664
										0.242086				0.27417
										0.241317				0.268576
										0.24119				0.248733
										0.24442				0.248235
										0.249787				0.259563
										0.241117				0.305842
										0.261674				0.311473
										0.234922				0.313027
										0.251443				0.263223
										0.297693				0.275502
										0.259141				0.250922
										0.273759				0.353731
										0.249869				0.260646
										0.230869				0.249755
										0.237557				0.255619
										0.255797				0.257673
										0.254041				0.267494
										0.24233				0.259422
										0.256701				0.251005
										0.25993				0.253308
										0.253674				0.236789
										0.670951				0.239603
										0.282673				0.235221
										0.263118				0.239332
										0.301154				0.236421
										0.305678				0.267379
										0.231059				0.240987
										0.34675				0.233305
										0.254577				0.23263
										0.268109				0.229566
										0.300907				0.233478
										0.306129				0.223091
										0.280341				0.22424
										0.305904				0.226831
										0.288204				0.222224
										0.285871				0.218323
										0.285025				0.232875
										0.29886				0.277621
										0.302355				0.298202
										0.295839				0.223584
										0.330652				0.222155
										0.312157				0.226133
										0.249976				0.232018
										0.26672				0.25126
										0.321705				0.256423
										0.272957				0.270842
										0.299598				0.262038
										0.320177				0.258397
										0.272278				0.261384
										0.293001				0.25649
										0.326995				0.260699
										0.376466				0.256407
										0.240908				0.245807
										0.306845				0.242515
										0.369935				0.236362
										0.286744				0.267714
										0.278183				0.236208
										0.284237				0.218588
										0.260522				0.252281
										0.314493				0.255229
										0.336409				0.258215
										0.2892				0.270753
										0.302555				0.277897
										0.302112				0.270213
										0.310893				0.259228
										0.271262				0.265607
										0.247809				0.260414
										0.239119				0.279665
										0.24123				0.226553
										0.293234				0.238361
										0.270129				0.247107
										0.357682				0.248911
										0.351592				0.241684
										0.295935				0.257518
										0.275013				0.25039
										0.306288				0.229301
										0.296484				0.219561
										0.302992				0.206434
										0.280818				0.262586
										0.299954				0.272182
										0.280018				0.279779
										0.242653				0.264171
										0.274123				0.259897
										0.292105				0.231044
										0.300793				0.268618
										0.323504				0.266276
										0.286618				0.282122
										0.352337				0.270342
										0.239571				0.275212
										0.252634				0.272375
										0.254546				0.233669
										0.273357				0.257579
										0.249286				0.247453
										0.247771				0.250862
										0.258247				0.228314
										0.281581				0.25959
										0.289603				0.270454
										0.275722				0.266257
										0.30307				0.238715
										0.267749				0.237628
										0.229071				0.28721
										0.265847				0.255346
										0.283332				0.27827
										0.253695				0.250079
										0.270076				0.291236
										0.329492				0.287657
										0.304862				0.280105
										0.307022				0.232523
										0.302876				0.278995
										0.308467				0.256794
										0.304574				0.242214
										0.310146				0.247726
										0.294376				0.267521
										0.289743				0.26286
										0.277492				0.318582
										0.278401				0.314198
										0.263271				0.289335
										0.333029				0.289426
										0.311154				0.285961
										0.293122				0.321178
										0.298288				0.309733
										0.325982				0.302901
										0.298193				0.271946
										0.273209				0.275368
										0.307656				0.269794
										0.562686				0.293759
										0.288757				0.253625
										0.264946				0.252052
										0.277372				0.291333
										0.249474				0.239857
										0.300343				0.266014
										0.277968				0.251667
										0.27892				0.277734
										0.307131				0.266334
										0.258412				0.256643
										0.264102				0.251895
										0.272691				0.259637
										0.252712				0.254731
										0.276986				0.269407
										0.243427				0.246447
										0.242035				0.277666
										0.232259				0.283752
										0.231151				0.273343
										0.22752				0.291268
										0.234428				0.248925
										0.234279				0.246851
										0.23732				0.254146
										0.246066				0.247567
										0.237267				0.246245
										0.240213				0.245047
										0.236219				0.256495
										0.245327				0.254038
										0.244647				0.225794
										0.243004				0.231452
										0.244391				0.245093
										0.267899				0.219439
										0.232674				0.223205
										0.233404				0.224896
										0.229713				0.235357
										0.26065				0.238678
										0.240912				0.23701
										0.237031				0.232973
										0.258019				0.238492
										0.251984				0.260152
										0.242698				0.251899
										0.24555				0.244816
										0.234888				0.249161
										0.254478				0.284875
										0.25397				0.318245
										0.247426				0.229436
										0.237235				0.252586
										0.242873				0.260245
										0.243824				0.25464
										0.242087				0.275943
										0.240346				0.258724
										0.245232				0.245598
										0.236842				0.233314
										0.229445				0.240481
										0.229556				0.238158
										0.226286				0.24263
										0.227297				0.24678
										0.24276				0.246041
										0.238251				0.242382
										0.241632				0.214621
										0.241438				0.257969
										0.246366				0.256553
										0.259914				0.236685
										0.236892				0.305212
										0.245204				0.219533
										0.256981				0.252167
										0.254818				0.223539
										0.252322				0.211156
										0.243668				0.205441
										0.248843				0.21297
										0.253345				0.212499
										0.244865				0.21713
										0.253046				0.237429
										0.239029				0.221853
										0.26245				0.226353
										0.250565				0.222248
										0.252674				0.227335
										0.248931				0.226931
										0.263948				0.221788
										0.262351				0.21912
										0.266354				0.226051
										0.265906				0.216076
										0.281862				0.215806
										0.256264				0.219504
										0.240064				0.221404
										0.270655				0.225018
										0.233377				0.22192
										0.28696				0.21966
										0.258578				0.222513
										0.272107				0.214175
										0.256508				0.218771
										0.263538				0.221027
										0.247315				0.225791
										0.290355				0.218399
										0.27137				0.219091
										0.271227				0.217202
										0.28116				0.232101
										0.292614				0.218607
										0.312627				0.215019
										0.283499				0.220659
										0.256251				0.225489
										0.264736				0.228063
										0.249213				0.20937
										0.249868				0.213184
										0.252084				0.209328
										0.301426				0.223356
										0.266713				0.207603
										0.275174				0.218899
										0.242918				0.22008
										0.236019				0.222369
										0.254245				0.221582
										0.235665				0.226308
										0.267846				0.226315
										0.239403				0.236071
										0.240236				0.22024
										0.244209				0.224673
										0.259633				0.229611
										0.310465				0.218694
										0.272731				0.216686
										0.266921				0.207906
										0.267958				0.214436
										0.284822				0.210721
										0.273054				0.206466
										0.277458				0.211561
										0.27917				0.193993
										0.276594				0.197159
										0.272005				0.226237
										0.270026				0.221229
										0.284001				0.220144
										0.249675				0.21881
										0.258166				0.206043
										0.268258				0.209245
										0.228253				0.224813
										0.240413				0.231422
										0.260575				0.221765
										0.214883				0.273536
										0.237734				0.270478
										0.258972				0.260966
										0.247474				0.259094
										0.249846				0.245287
										0.253229				0.239304
										0.239136				0.263065
										0.269652				0.254903
										0.245844				0.251186
										0.235194				0.23986
										0.235387				0.284306
										0.230587				0.261079
										0.234805				0.255715
										0.268374				0.248444
										0.263148				0.25851
										0.267365				0.266353
										0.239969				0.246724
										0.244868				0.26404
										0.2994				0.257338
										0.280521				0.258439
										0.245758				0.252923
										0.257757				0.266826
										0.273253				0.231276
										0.259507				0.250959
										0.261416				0.251659
										0.254419				0.238351
										0.334314				0.256931
										0.270073				0.281998
										0.298587				0.257
										0.233656				0.254783
										0.235802				0.255432
										0.250948				0.287215
										0.287298				0.273946
										0.267351				0.270096
										0.259016				0.26615
										0.235222				0.273669
										0.229452				0.267929
										0.24809				0.255454
										0.211925				0.269953
										0.274862				0.246141
										0.352067				0.292503
										0.285098				0.25113
										0.299131				0.253617
										0.237926				0.250706
										0.240299				0.264159
										0.238327				0.255945
										0.230785				0.273113
										0.253791				0.259908
										0.239267				0.261993
										0.233142				0.268647
										0.238355				0.256252
										0.274954				0.257998
										0.285073				0.256414
										0.280886				0.264099
										0.304871				0.279167
										0.282592				0.2583
										0.222456				0.271936
										0.234877				0.263876
										0.232845				0.260794
										0.284943				0.218484
										0.349289				0.237118
										0.332848				0.232504
										0.290403				0.221589
										0.27702				0.23612
										0.276058				0.227786
										0.284562				0.24016
										0.268136				0.233896
										0.292765				0.235532
										0.29339				0.231359
										0.290672				0.241327
										0.269732				0.241297
										0.295283				0.240164
										0.28456				0.240256
										0.2566				0.22436
										0.312409				0.271855
										0.324222				0.235376
										0.249282				0.242142
										0.265782				0.244653
										0.276205				0.241516
										0.262064				0.244834
										0.27134				0.24394
										0.26825				0.243635
										0.269494				0.232141
										0.279172				0.254739
										0.277238				0.252829
										0.277516				0.26455
										0.258194				0.246646
										0.267238				0.255141
										0.282309				0.234927
										0.291465				0.242166
										0.278387				0.254039
										0.278752				0.261593
										0.288693				0.26212
										0.288451				0.2656
										0.301807				0.241952
										0.278176				0.228948
										0.307147				0.231022
										0.287562				0.249474
										0.274811				0.233173
										0.264924				0.275496
										0.300264				0.233851
										0.269329				0.265756
										0.288593				0.24762
										0.300736				0.235911
										0.262023				0.228029
										0.251343				0.225813
										0.299024				0.284378
										0.301967				0.266722
										0.260314				0.256108
										0.277881				0.235873
										0.295167				0.247064
										0.283089				0.23644
										0.468174				0.228354
										0.329565				0.229855
										0.259474				0.229887
										0.338584				0.248042
										0.37179				0.259419
										0.264951				0.215658
														0.231227
														0.312265
														0.234747
														0.232948
														0.233939
														0.23672
														0.233788
														0.23756
														0.236388
														0.225547
														0.226583
														0.230738
														0.226877
														0.229834
														0.230322
														0.21048
														0.226518
														0.22054
														0.225892
														0.238167
														0.227796
														0.227471
														0.228587
														0.228782
														0.241859
														0.227239
														0.222126
														0.219248
														0.234601
														0.228845
														0.2188
														0.256132
														0.24687
														0.235465
														0.228784
														0.230372
														0.245552
														0.225924
														0.232092
														0.224677
														0.221677
														0.232112
														0.231194
														0.236666
														0.230757
														0.246484
														0.238367
														0.236544
														0.235737
														0.235023
														0.224895
														0.225284
														0.226286
														0.218035
														0.220975
														0.246342
														0.220332
														0.218035
														0.223267
														0.235047
														0.233872
														0.234371
														0.237216
														0.256684
														0.238742
														0.273243
														0.252435
														0.233259
														0.231737
														0.241318
														0.228997
														0.284578
														0.21653

## Sheet: Fig.2B
														Basal ratios
	MDA-MB-453 ctrl				MDA-MB-453 + PAX				MDA-MB-453 + IBTX					MDA-MB-453
Time (min)	Average	SD	N (cells)		Average	SD	N (cells)		Average	SD	N (cells)			ctrl	+ PAX	+ IBTX
0	0.455703	0.183897	151		0.368999	0.0334582	132		0.391022	0.0748149	87			0.413551	0.445039	0.322206
0.0504617	0.429957	0.103545	151		0.368779	0.0323165	132		0.38679	0.0653947	87			0.362066	0.41342	0.329715
0.100048	0.420794	0.0948011	151		0.367708	0.0319543	132		0.381536	0.0582892	87			0.485738	0.464723	0.32897
0.15002	0.415185	0.0883065	151		0.367822	0.0315347	132		0.379525	0.0538089	87			0.35193	0.368147	0.344981
0.200158	0.410343	0.0831189	151		0.366192	0.03103	132		0.37764	0.0505241	87			0.39957	0.373081	0.330108
0.250035	0.406673	0.0802365	151		0.365047	0.0312189	132		0.377853	0.0483394	87			0.38226	0.377626	0.285529
0.300268	0.404596	0.0784959	151		0.365841	0.0310034	132		0.375074	0.0460148	87			0.352429	0.379704	0.348119
0.350172	0.402111	0.0763615	151		0.366445	0.0309531	132		0.375553	0.0448537	87			0.36232	0.373307	0.344999
0.400043	0.401109	0.0758676	151		0.366303	0.0314381	132		0.374529	0.0438626	87			0.444205	0.392471	0.368195
0.450088	0.399766	0.0747536	151		0.36688	0.0313919	132		0.373359	0.0428709	87			0.38487	0.361776	0.457446
0.500032	0.399739	0.0743227	151		0.3676	0.0312846	132		0.373253	0.0422848	87			0.374503	0.382071	0.364424
0.55005	0.399673	0.0733482	151		0.365829	0.0311169	132		0.373705	0.0416676	87			0.438051	0.364377	0.444926
0.600205	0.398045	0.0732736	151		0.366092	0.0312239	132		0.372864	0.0412763	87			0.506401	0.368801	0.380566
0.650278	0.397689	0.0742959	151		0.36651	0.0311272	132		0.372449	0.0408695	87			0.365275	0.368418	0.376576
0.700083	0.397951	0.0730664	151		0.366581	0.0310869	132		0.373066	0.0405299	87			0.366942	0.362269	0.394796
0.750152	0.399262	0.073575	151		0.368117	0.0313302	132		0.372882	0.0405707	87			0.391887	0.370421	0.361794
0.800192	0.397201	0.0727952	151		0.367424	0.0312104	132		0.371934	0.0403386	87			0.373957	0.384	0.319411
0.850118	0.396759	0.0719175	151		0.368977	0.0313983	132		0.37294	0.0402997	87			0.346243	0.408793	0.316736
0.900162	0.399404	0.0738728	151		0.367013	0.0314584	132		0.3733	0.0401363	87			0.345843	0.4006	0.377091
0.950055	0.399374	0.0743757	151		0.36733	0.0314579	132		0.37587	0.0403002	87			0.348298	0.417922	0.375491
1.00022	0.401281	0.0755176	151		0.368064	0.0315547	132		0.376144	0.0402405	87			0.404691	0.363992	0.342334
1.05013	0.402036	0.0796376	151		0.368018	0.031427	132		0.375377	0.0398484	87			0.351739	0.370962	0.497359
1.10013	0.399544	0.0781317	151		0.368695	0.0318114	132		0.376514	0.0402112	87			0.358022	0.375563	0.368913
1.15013	0.400515	0.07719	151		0.36933	0.0316811	132		0.376357	0.0397483	87			0.371289	0.361954	0.363768
1.20022	0.402138	0.0767802	151		0.369644	0.0317514	132		0.377606	0.0398365	87			0.388494	0.412803	0.360625
1.25002	0.400652	0.075616	151		0.369418	0.0317706	132		0.377098	0.0400869	87			0.411821	0.35264	0.367903
1.30009	0.401375	0.0756793	151		0.3704	0.031967	132		0.377548	0.0398633	87			0.433164	0.365658	0.373735
1.35009	0.401258	0.0748248	151		0.37108	0.0321765	132		0.377121	0.0397947	87			0.432598	0.352618	0.410422
1.40024	0.403517	0.0751504	151		0.370059	0.0325452	132		0.378032	0.0394558	87			0.3652	0.43613	0.430711
1.45017	0.403832	0.0772385	151		0.371043	0.0330733	132		0.379314	0.0392757	87			0.367686	0.378002	0.393782
1.50004	0.404601	0.0804105	151		0.371461	0.0333367	132		0.378448	0.0396958	87			0.404337	0.398198	0.401491
1.55028	0.402079	0.0777004	151		0.37173	0.034184	132		0.37778	0.0401109	87			0.347298	0.381615	0.359206
1.60012	0.40265	0.076313	151		0.373723	0.035974	132		0.378446	0.0400758	87			0.378876	0.385932	0.354339
1.65028	0.402591	0.0744956	151		0.372789	0.0362001	132		0.377843	0.0397824	87			0.359911	0.385932	0.354388
1.70012	0.402179	0.0741601	151		0.372946	0.0352563	132		0.375855	0.0391428	87			0.403419	0.322012	0.423493
1.75009	0.402086	0.0751602	151		0.373414	0.0349799	132		0.377577	0.0398902	87			0.408978	0.303949	0.420584
1.80013	0.40478	0.0754823	151		0.373423	0.0350329	132		0.376882	0.0398236	87			0.311104	0.329684	0.311845
1.85018	0.402687	0.0747887	151		0.373698	0.0347939	132		0.377514	0.0396673	87			0.358895	0.334639	0.300186
1.90022	0.403062	0.074178	151		0.373677	0.0337642	132		0.378321	0.0396238	87			0.341335	0.368985	0.283418
1.95019	0.403386	0.0748484	151		0.373316	0.0334292	132		0.378446	0.0401384	87			0.332607	0.355551	0.423038
2.00023	0.402836	0.0732624	151		0.372892	0.0327236	132		0.377822	0.0401568	87			0.32186	0.37579	0.394932
2.05024	0.402081	0.0724467	151		0.372839	0.032583	132		0.378675	0.0404707	87			0.333463	0.365524	0.414118
2.10024	0.402372	0.0720126	151		0.37203	0.0326759	132		0.378428	0.0405233	87			0.37137	0.378915	0.366139
2.15028	0.401138	0.0714325	151		0.372118	0.0322574	132		0.378823	0.0403531	87			0.330496	0.370522	0.355438
2.20008	0.401207	0.0700021	151		0.371173	0.0322707	132		0.379478	0.0403515	87			0.332024	0.36175	0.342607
2.25022	0.400845	0.0710064	151		0.371856	0.0322289	132		0.377536	0.0405602	87			0.373925	0.387432	0.338626
2.30026	0.4012	0.0715293	151		0.370921	0.0322805	132		0.377198	0.0401348	87			0.366074	0.386193	0.355814
2.35003	0.401609	0.0707328	151		0.372267	0.0320109	132		0.377746	0.0404233	87			0.361196	0.374805	0.39274
2.40016	0.400812	0.0698611	151		0.372585	0.0323571	132		0.377862	0.0402857	87			0.388661	0.376378	0.385232
2.45023	0.402543	0.0700256	151		0.371661	0.0323392	132		0.376923	0.0408443	87			0.374051	0.380829	0.380903
2.50027	0.402144	0.0694117	151		0.37201	0.0327723	132		0.378698	0.0405097	87			0.46433	0.382249	0.436701
2.55008	0.401748	0.0692616	151		0.372111	0.0327421	132		0.378856	0.0406623	87			0.382588	0.383637	0.400049
2.60011	0.40259	0.0696159	151		0.372276	0.0329855	132		0.37979	0.0409154	87			0.380805	0.326684	0.392681
2.65022	0.402977	0.069354	151		0.373241	0.0333612	132		0.379233	0.041024	87			0.38164	0.315259	0.383578
2.70005	0.402272	0.0689737	151		0.373285	0.0329734	132		0.379564	0.0412493	87			0.460965	0.367503	0.417145
2.75016	0.403483	0.0701434	151		0.373595	0.0333227	132		0.379301	0.0415181	87			0.370573	0.4617	0.380574
2.80026	0.401219	0.0697809	151		0.372012	0.0332153	132		0.37911	0.0417289	87			0.369288	0.415534	0.374394
2.8501	0.401189	0.0692372	151		0.374167	0.033286	132		0.381195	0.0420624	87			0.394407	0.413486	0.385748
2.90027	0.401881	0.0684989	151		0.375239	0.0337185	132		0.380555	0.0419507	87			0.389744	0.410142	0.406878
2.95004	0.401739	0.0692548	151		0.373497	0.0330725	132		0.379494	0.0420395	87			0.400015	0.391547	0.340645
3.00011	0.403536	0.0693367	151		0.374333	0.0332257	132		0.381862	0.042959	87			0.416506	0.368916	0.357474
3.05025	0.402865	0.0691444	151		0.375477	0.0332269	132		0.380793	0.0440672	87			0.373336	0.372403	0.393196
3.10025	0.402076	0.0681946	151		0.373868	0.0335631	132		0.38101	0.0455806	87			0.358955	0.342355	0.365042
3.15006	0.402272	0.0683411	151		0.373356	0.033262	132		0.381532	0.0472378	87			0.361389	0.401713	0.372948
3.20006	0.402551	0.0683772	151		0.373516	0.0337708	132		0.381945	0.0477614	87			0.384041	0.3342	0.373168
3.25017	0.402605	0.0675349	151		0.3743	0.0333237	132		0.383006	0.0492744	87			0.375039	0.542697	0.391136
3.30002	0.402642	0.0684925	151		0.374414	0.0335014	132		0.381953	0.0494525	87			0.363427	0.420323	0.398231
3.35011	0.402091	0.0676336	151		0.375102	0.0334925	132		0.382113	0.0485842	87			0.427583	0.333206	0.406202
3.40021	0.402809	0.0674604	151		0.374952	0.0335083	132		0.381348	0.0488205	87			0.497976	0.3808	0.393198
3.45008	0.402833	0.0678472	151		0.374879	0.0338726	132		0.382278	0.0484478	87			0.357696	0.410027	0.381135
3.50002	0.404017	0.0682257	151		0.375368	0.0334978	132		0.382536	0.0483642	87			0.34615	0.390311	0.392687
3.55009	0.404817	0.0683873	151		0.375418	0.0343713	132		0.383652	0.0487757	87			0.347008	0.397968	0.560254
3.60006	0.404858	0.0679686	151		0.375523	0.0338728	132		0.382297	0.0492905	87			0.37848	0.379765	0.406501
3.65017	0.403783	0.0678213	151		0.37582	0.0336819	132		0.38444	0.0490168	87			0.393692	0.362019	0.35472
3.7002	0.40474	0.0674349	151		0.375588	0.0338853	132		0.38364	0.0481065	87			0.38904	0.363206	0.400922
3.75024	0.405205	0.0678049	151		0.377329	0.034172	132		0.382931	0.0484803	87			0.364413	0.352168	0.382403
3.80021	0.404367	0.0677933	151		0.375157	0.0341901	132		0.383261	0.0476113	87			0.369835	0.346947	0.43171
3.85005	0.405304	0.0675816	151		0.377458	0.0344699	132		0.383539	0.0470529	87			0.371777	0.422387	0.418152
3.90012	0.404817	0.0676346	151		0.377483	0.034405	132		0.383394	0.0468382	87			0.390144	0.365196	0.380304
3.95006	0.403181	0.0675233	151		0.377223	0.0341783	132		0.382416	0.045953	87			0.436377	0.372732	0.380053
4.00011	0.405317	0.0676533	151		0.377892	0.0345229	132		0.382824	0.0454397	87			0.430239	0.317329	0.365491
4.05028	0.404975	0.0671599	151		0.377955	0.0349383	132		0.381618	0.0442213	87			0.455272	0.394095	0.355872
4.10009	0.406379	0.0675054	151		0.377372	0.0347686	132		0.382156	0.0441336	87			0.364441	0.392247	0.393305
4.15022	0.40677	0.0673354	151		0.377822	0.0351503	132		0.382514	0.0437394	87			0.377656	0.370095	0.436063
4.20006	0.405726	0.0677877	151		0.378842	0.0355412	132		0.381759	0.0434117	87			0.412297	0.403957	0.437928
4.2501	0.408275	0.0700639	151		0.378846	0.0350631	132		0.382029	0.0431989	87			0.422043	0.339118	0.376026
4.3002	0.407977	0.071576	151		0.378317	0.0355477	132		0.382136	0.0427857	87			0.42219	0.350076	0.340831
4.35006	0.408833	0.0734264	151		0.378456	0.0357281	132		0.38203	0.0420824	87			0.400579	0.332861
4.40018	0.412092	0.0767145	151		0.378512	0.0363843	132		0.382338	0.0423271	87			0.369252	0.337624
4.45028	0.411197	0.0775834	151		0.378714	0.0361183	132		0.381586	0.0419891	87			0.595258	0.348853
4.50005	0.41167	0.0775561	151		0.379133	0.0361097	132		0.382341	0.0416958	87			0.376035	0.333421
4.55006	0.410803	0.0770678	151		0.377813	0.0358031	132		0.382584	0.0422016	87			0.368099	0.360501
4.6002	0.411098	0.077269	151		0.379111	0.0360632	132		0.383172	0.0419875	87			0.438806	0.385648
4.65017	0.410241	0.0751711	151		0.378973	0.0368136	132		0.381262	0.0421582	87			0.494552	0.360214
4.70024	0.408108	0.0734755	151		0.378061	0.0363515	132		0.38304	0.0419254	87			0.369836	0.362807
4.75028	0.40674	0.0715928	151		0.37896	0.0364709	132		0.382531	0.0417726	87			0.357834	0.353536
4.80028	0.407423	0.0722013	151		0.380704	0.0366943	132		0.381503	0.0417707	87			0.375581	0.389354
4.85008	0.40891	0.0719981	151		0.379161	0.0365864	132		0.384063	0.0422384	87			0.383926	0.350398
4.90002	0.409117	0.0719331	151		0.379745	0.0371872	132		0.383876	0.042109	87			0.360869	0.38018
4.95009	0.408088	0.0714763	151		0.378836	0.036956	132		0.383406	0.0419211	87			0.367473	0.332485
5.00019	0.407911	0.0714409	151		0.380118	0.0368579	132		0.382634	0.0418977	87			0.372767	0.369234
5.05008	0.408884	0.0735498	151		0.377898	0.0371337	132		0.384556	0.0427103	87			0.378193	0.363677
5.10016	0.409269	0.0757577	151		0.379573	0.0373552	132		0.38386	0.042123	87			0.373725	0.358511
5.15027	0.408385	0.0737201	151		0.379221	0.0369013	132		0.383713	0.0432149	87			0.37025	0.375079
5.20007	0.407681	0.072056	151		0.38093	0.0375384	132		0.385767	0.0431184	87			0.379047	0.342572
5.25017	0.407567	0.071464	151		0.378336	0.0368879	132		0.384687	0.0433231	87			0.379192	0.334794
5.30008	0.406367	0.0696922	151		0.379327	0.0367504	132		0.384164	0.0435793	87			0.387077	0.344013
5.35012	0.406644	0.0694542	151		0.38015	0.037084	132		0.383644	0.0436076	87			0.385706	0.344507
5.40002	0.408757	0.0732912	151		0.382464	0.04154	132		0.383389	0.0434315	87			0.457261	0.347837
5.45009	0.457234	0.146668	151		0.444944	0.175497	132		0.382809	0.043341	87			0.412716	0.404602
5.50023	0.553293	0.295548	151		0.540417	0.314286	132		0.384032	0.0442694	87			0.448534	0.408709
5.55004	0.597985	0.361458	151		0.591508	0.367599	132		0.395514	0.0638335	87			0.374473	0.352564
5.60007	0.616589	0.392838	151		0.675242	0.391454	132		0.53194	0.314869	87			0.375143	0.357845
5.65014	0.644193	0.424212	151		0.823127	0.411158	132		0.576271	0.382497	87			0.467838	0.349725
5.70018	0.724345	0.457208	151		0.938875	0.409528	132		0.651928	0.433111	87			0.347536	0.386812
5.7501	0.788923	0.494247	151		1.02434	0.393095	132		0.770866	0.492845	87			0.432369	0.358568
5.80019	0.830623	0.520898	151		1.08984	0.376865	132		0.880798	0.561341	87			0.337839	0.334769
5.85026	0.871668	0.541406	151		1.15239	0.374763	132		0.953097	0.613897	87			0.408382	0.3772
5.90003	0.923572	0.539574	151		1.19601	0.368232	132		0.985287	0.637939	87			0.396269	0.353469
5.95014	1.0399	0.499911	151		1.23393	0.375904	132		1.0111	0.660054	87			0.83198	0.347127
6.00024	1.14422	0.439187	151		1.26215	0.377071	132		1.03381	0.671947	87			0.385182	0.343149
6.05021	1.20728	0.397768	151		1.27119	0.384864	132		1.04377	0.67043	87			0.484951	0.348527
6.10018	1.24221	0.382084	151		1.28105	0.385893	132		1.11202	0.637682	87			0.408911	0.400158
6.15003	1.26934	0.384192	151		1.28104	0.386738	132		1.23161	0.577146	87			0.396997	0.38581
6.20029	1.28473	0.385896	151		1.2853	0.388051	132		1.29039	0.560652	87			0.364914	0.362857
6.25009	1.30642	0.396478	151		1.27783	0.386669	132		1.31497	0.546256	87			0.46324	0.438043
6.30026	1.31762	0.400616	151		1.27397	0.387773	132		1.33642	0.55315	87			0.446266	0.354844
6.35003	1.32419	0.409192	151		1.26904	0.387844	132		1.35588	0.564963	87			0.590988	0.351849
6.40007	1.32672	0.412861	151		1.25686	0.385558	132		1.37679	0.573446	87			0.488094	0.368889
6.45021	1.32374	0.41558	151		1.25017	0.385294	132		1.37864	0.575999	87			0.730011	0.335216
6.50024	1.31333	0.413008	151		1.23272	0.380644	132		1.38164	0.575577	87			0.426641	0.339877
6.55005	1.30278	0.410063	151		1.22695	0.380417	132		1.37986	0.572372	87			0.436913	0.370985
6.60012	1.29288	0.412061	151		1.21309	0.377634	132		1.37879	0.567694	87			0.350116
6.65014	1.27844	0.410795	151		1.20662	0.37875	132		1.36622	0.55985	87			0.430421
6.70003	1.26651	0.408469	151		1.18431	0.370527	132		1.36078	0.55473	87			0.443184
6.75023	1.25054	0.409222	151		1.17221	0.369013	132		1.34825	0.546055	87			0.415968
6.80027	1.23434	0.409575	151		1.15496	0.364624	132		1.33864	0.539654	87			0.446504
6.85008	1.22097	0.405515	151		1.14089	0.36099	132		1.3235	0.534378	87			0.39387
6.90015	1.20306	0.40687	151		1.12436	0.357253	132		1.30455	0.526162	87			0.437061
6.95025	1.18415	0.404693	151		1.1131	0.356018	132		1.28469	0.519855	87			0.443286
7.00002	1.16899	0.403122	151		1.09727	0.352129	132		1.27152	0.510254	87			0.499941
7.05013	1.15424	0.40393	151		1.08125	0.348586	132		1.24741	0.49809	87			0.413171
7.10016	1.14011	0.40025	151		1.06554	0.345578	132		1.22643	0.492844	87			0.40972
7.15023	1.12689	0.400221	151		1.04789	0.341814	132		1.21262	0.488887	87			0.39256
7.20022	1.10837	0.401329	151		1.02768	0.336177	132		1.18873	0.480253	87			0.529693
7.25004	1.08709	0.393396	151		1.01675	0.334211	132		1.17329	0.475016	87			0.435612
7.30018	1.07356	0.39206	151		1.00231	0.330574	132		1.15659	0.464847	87			0.703433
7.35007	1.05743	0.389243	151		0.981458	0.324478	132		1.13807	0.458025	87			0.383675
7.40019	1.04596	0.391085	151		0.967873	0.321168	132		1.11982	0.453225	87			0.370886
7.45003	1.02925	0.391301	151		0.949386	0.315786	132		1.10722	0.44849	87			0.442398
7.50013	1.01054	0.380691	151		0.937901	0.313371	132		1.08539	0.441985	87			0.488148
7.5502	1.00492	0.38255	151		0.924769	0.310713	132		1.07228	0.435442	87
7.60024	0.994384	0.382716	151		0.905088	0.304604	132		1.05808	0.431588	87
7.65008	0.974853	0.380687	151		0.891626	0.301535	132		1.03701	0.426802	87
7.70012	0.96214	0.370971	151		0.881597	0.300042	132		1.02142	0.423141	87
7.7501	0.952737	0.366104	151		0.860076	0.293481	132		1.00832	0.415269	87
7.80023	0.937366	0.360234	151		0.848058	0.290758	132		0.993843	0.407523	87
7.85023	0.931325	0.361126	151		0.834502	0.287247	132		0.979386	0.403482	87
7.90027	0.92405	0.359551	151		0.822576	0.283631	132		0.962513	0.399973	87
7.9501	0.902995	0.353117	151		0.807398	0.279498	132		0.945337	0.396429	87
8.00003	0.89241	0.35174	151		0.796149	0.276419	132		0.933989	0.391504	87
8.05005	0.885464	0.347338	151		0.787209	0.27296	132		0.925661	0.385988	87
8.10008	0.879529	0.347946	151		0.776836	0.26915	132		0.9137	0.380171	87
8.15002	0.866548	0.34193	151		0.761879	0.265437	132		0.899298	0.377538	87
8.20003	0.85103	0.336107	151		0.752128	0.264456	132		0.884568	0.372977	87
8.25009	0.842376	0.33013	151		0.740322	0.260147	132		0.873521	0.369321	87
8.30017	0.831407	0.324814	151		0.72797	0.255032	132		0.865643	0.364265	87
8.35005	0.823928	0.319955	151		0.719871	0.252179	132		0.853633	0.359755	87
8.40009	0.817503	0.320393	151		0.713578	0.251515	132		0.842447	0.356906	87
8.45008	0.803485	0.314725	151		0.703718	0.248452	132		0.832348	0.352409	87
8.50022	0.797508	0.311753	151		0.694174	0.244711	132		0.823103	0.348656	87
8.55004	0.789543	0.306184	151		0.683064	0.240759	132		0.816034	0.345111	87
8.60022	0.787723	0.304916	151		0.675316	0.237963	132		0.80399	0.340297	87
8.65005	0.780869	0.299373	151		0.665227	0.234305	132		0.79809	0.341083	87
8.70012	0.769832	0.297792	151		0.656566	0.231223	132		0.791556	0.336808	87
8.75019	0.761871	0.295808	151		0.648284	0.228058	132		0.782567	0.331585	87
8.80025	0.753844	0.291194	151		0.640196	0.225812	132		0.774991	0.328831	87
8.85028	0.746472	0.285444	151		0.634311	0.223208	132		0.765202	0.323366	87
8.90009	0.744551	0.283294	151		0.625355	0.219652	132		0.759317	0.320581	87
8.95009	0.734134	0.275817	151		0.619679	0.216618	132		0.749076	0.316307	87
9.00016	0.726515	0.273263	151		0.612423	0.214399	132		0.744975	0.313541	87
9.05003	0.720934	0.269558	151		0.607708	0.212857	132		0.739614	0.314353	87
9.10024	0.716114	0.266802	151		0.60185	0.209088	132		0.729279	0.30976	87
9.15016	0.711987	0.266622	151		0.59656	0.20703	132		0.726591	0.312099	87
9.20017	0.708528	0.263059	151		0.589439	0.203902	132		0.72406	0.308681	87
9.25014	0.700891	0.258441	151		0.583668	0.20255	132		0.719416	0.307539	87
9.30011	0.693613	0.255325	151		0.579707	0.200412	132		0.709763	0.304721	87
9.35005	0.69069	0.253256	151		0.573951	0.196188	132		0.703062	0.300993	87
9.40022	0.688629	0.250654	151		0.566967	0.192382	132		0.701854	0.300753	87
9.45006	0.688659	0.248835	151		0.562752	0.191041	132		0.697611	0.29948	87
9.50002	0.680056	0.245439	151		0.560208	0.190524	132		0.687528	0.293882	87
9.55012	0.677428	0.243105	151		0.554227	0.188096	132		0.684862	0.29274	87
9.60023	0.675234	0.240003	151		0.550478	0.186091	132		0.67783	0.290741	87
9.65006	0.671798	0.237357	151		0.545314	0.183459	132		0.677886	0.291145	87
9.70023	0.666543	0.234922	151		0.541803	0.181246	132		0.676392	0.29098	87
9.75014	0.662583	0.23145	151		0.537375	0.178487	132		0.67189	0.28912	87
9.80004	0.65813	0.22611	151		0.5338	0.176207	132		0.664699	0.28311	87
9.85011	0.652575	0.222183	151		0.532994	0.17601	132		0.666149	0.28353	87
9.90005	0.650005	0.219736	151		0.529149	0.173959	132		0.658614	0.278729	87
9.95009	0.650166	0.220583	151		0.525689	0.170795	132		0.657528	0.278719	87
10.0001	0.644052	0.21835	151		0.523218	0.168602	132		0.652999	0.274854	87
10.0502	0.641379	0.215659	151		0.522805	0.168285	132		0.652298	0.276287	87
10.1001	0.636201	0.213	151		0.517742	0.166542	132		0.651905	0.275559	87
10.15	0.635589	0.210363	151		0.515062	0.164579	132		0.649539	0.273347	87
10.2002	0.633199	0.206641	151		0.512957	0.162588	132		0.642961	0.270449	87
10.2502	0.630582	0.206818	151		0.509711	0.160146	132		0.641753	0.26928	87
10.3002	0.630942	0.206821	151		0.507805	0.158634	132		0.636813	0.266172	87
10.3501	0.62715	0.202489	151		0.506555	0.156853	132		0.637811	0.268093	87
10.4001	0.62272	0.200759	151		0.503686	0.156141	132		0.631249	0.263046	87
10.4502	0.618472	0.197434	151		0.50203	0.155652	132		0.632157	0.26078	87
10.5002	0.615897	0.195838	151		0.501186	0.153754	132		0.629447	0.260793	87
10.55	0.610766	0.19376	151		0.496663	0.150343	132		0.625979	0.257496	87
10.6	0.602245	0.190419	151		0.494442	0.147777	132		0.623368	0.254411	87
10.6502	0.597819	0.188469	151		0.488898	0.143034	132		0.618946	0.247478	87
10.7001	0.593474	0.18507	151		0.482553	0.137696	132		0.61842	0.245035	87
10.7502	0.584793	0.182411	151		0.476478	0.133416	132		0.611353	0.239738	87
10.8002	0.578888	0.179526	151		0.470958	0.128687	132		0.603625	0.231909	87
10.8501	0.56785	0.17671	151		0.463686	0.124416	132		0.595814	0.223991	87
10.9002	0.55898	0.174349	151		0.455921	0.118676	132		0.584623	0.216983	87
10.9502	0.555093	0.174804	151		0.451249	0.113607	132		0.574197	0.208287	87
11.0001	0.550041	0.174711	151		0.44292	0.109593	132		0.561709	0.197519	87
11.0501	0.542762	0.174161	151		0.435738	0.10464	132		0.550186	0.191136	87
11.1002	0.533436	0.17259	151		0.429733	0.0996512	132		0.535043	0.185046	87
11.1501	0.530496	0.174573	151		0.422727	0.0947382	132		0.520844	0.176056	87
11.2002	0.52454	0.172842	151		0.415012	0.0897115	132		0.507911	0.169674	87
11.2501	0.518046	0.169197	151		0.409035	0.0847461	132		0.494247	0.163745	87
11.3001	0.514081	0.168664	151		0.401651	0.0793034	132		0.483594	0.158976	87
11.35	0.509407	0.168734	151		0.395552	0.0750009	132		0.470869	0.153591	87
11.4	0.503616	0.167965	151		0.391153	0.0716591	132		0.463105	0.149274	87
11.4502	0.500924	0.169041	151		0.385866	0.0678132	132		0.45219	0.143208	87
11.5001	0.494532	0.163964	151		0.382761	0.0647553	132		0.446434	0.138735	87
11.5502	0.487995	0.160064	151		0.37843	0.061465	132		0.438291	0.131303	87
11.6001	0.484457	0.159328	151		0.373686	0.0582604	132		0.433359	0.126737	87
11.6501	0.476842	0.154564	151		0.372788	0.0551702	132		0.430569	0.121203	87
11.7001	0.470502	0.150549	151		0.369635	0.0523346	132		0.42588	0.116589	87
11.7502	0.465828	0.147061	151		0.367146	0.0495085	132		0.424369	0.111147	87
11.8001	0.464083	0.147159	151		0.366137	0.0467776	132		0.420813	0.105501	87
11.8501	0.457487	0.140796	151		0.364948	0.0447123	132		0.419575	0.102883	87
11.9002	0.453936	0.136455	151		0.362533	0.0426491	132		0.415823	0.0979171	87
11.9501	0.447852	0.130577	151		0.362099	0.0411469	132		0.414551	0.0937788	87
12.0002	0.443905	0.128065	151		0.360727	0.0395365	132		0.411671	0.0892577	87
12.0502	0.438802	0.123996	151		0.358239	0.0388056	132		0.409683	0.0856675	87
12.1001	0.434213	0.117005	151		0.358199	0.0381259	132		0.410226	0.0836241	87
12.1501	0.431134	0.113688	151		0.356866	0.0373708	132		0.408691	0.0798866	87
12.2	0.427439	0.107515	151		0.358048	0.0376584	132		0.407547	0.0770749	87
12.2502	0.424103	0.102438	151		0.356041	0.0370605	132		0.4067	0.0741247	87
12.3002	0.420858	0.0976262	151		0.356295	0.0370066	132		0.406385	0.0730679	87
12.3502	0.418461	0.0935518	151		0.357221	0.0368184	132		0.405841	0.0716605	87
12.4002	0.413195	0.0882988	151		0.357221	0.0365644	132		0.405792	0.0704031	87
12.4501	0.412358	0.0841466	151		0.356331	0.0364003	132		0.404834	0.0692216	87
12.5002	0.409604	0.0810552	151		0.357264	0.0366686	132		0.405107	0.0691192	87
12.5502	0.40485	0.0773451	151		0.356489	0.0364792	132		0.405156	0.0692899	87
12.6001	0.403701	0.0752817	151		0.357111	0.0364759	132		0.405413	0.0682255	87
12.6501	0.400733	0.0723461	151		0.357052	0.0365206	132		0.404211	0.0675165	87
12.7001	0.400428	0.0708031	151		0.356535	0.0366531	132		0.40436	0.0670626	87
12.7503	0.399374	0.0689294	151		0.357189	0.0366139	132		0.403887	0.0672113	87
12.8001	0.397179	0.0672284	151		0.355726	0.036945	132		0.405716	0.0678787	87
12.8501	0.397402	0.0662974	151		0.356208	0.0362929	132		0.405808	0.0675183	87
12.9001	0.395881	0.0653784	151		0.357166	0.0367701	132		0.406072	0.067489	87
12.9501	0.394698	0.0648351	151		0.357542	0.0367218	132		0.404706	0.0681651	87
13.0002	0.395134	0.0641557	151		0.35641	0.0367956	132		0.405666	0.0694534	87
13.0502	0.394538	0.0637755	151		0.357286	0.0368937	132		0.405428	0.0689189	87
13.1	0.39273	0.0631874	151		0.357327	0.0368724	132		0.403613	0.0686697	87
13.1501	0.39549	0.0636371	151		0.355838	0.0365307	132		0.403933	0.068058	87
13.2001	0.392229	0.063242	151		0.357389	0.0370777	132		0.405385	0.0687315	87
13.2501	0.394279	0.0630808	151		0.357839	0.0367761	132		0.403823	0.0678424	87
13.3001	0.39383	0.0632262	151		0.357467	0.037254	132		0.403282	0.0676345	87
13.3502	0.395081	0.062748	151		0.358792	0.03767	132		0.403757	0.0669344	87
13.4002	0.393626	0.0629786	151		0.358268	0.0372246	132		0.404079	0.0670892	87
13.4502	0.394045	0.0631257	151		0.358281	0.0373782	132		0.405052	0.0678288	87
13.5003	0.394456	0.0629003	151		0.359114	0.0379371	132		0.405192	0.0686348	87
13.5501	0.394063	0.0626178	151		0.359885	0.0377844	132		0.405034	0.0694965	87
13.6001	0.394418	0.0626016	151		0.359218	0.0384252	132		0.40361	0.0688886	87
13.6502	0.394885	0.0627608	151		0.360258	0.0389747	132		0.402185	0.0680777	87
13.7003	0.393591	0.0624935	151		0.362124	0.0398283	132		0.403475	0.0675631	87
13.7503	0.395187	0.0624145	151		0.361309	0.0403299	132		0.403121	0.0664271	87
13.8003	0.39308	0.0623809	151		0.363839	0.0414687	132		0.403436	0.0658645	87
13.85	0.394138	0.062477	151		0.364052	0.0431816	132		0.404561	0.0651932	87
13.9001	0.393264	0.0623365	151		0.366388	0.0459084	132		0.402893	0.0653509	87
13.9502	0.392543	0.0625561	151		0.367365	0.0473922	132		0.40277	0.0667756	87
14.0002	0.392729	0.0626471	151		0.369771	0.0491649	132		0.404087	0.0675879	87
14.0501	0.394528	0.0625392	151		0.369679	0.0491441	132		0.403138	0.066604	87
14.1002	0.393865	0.0624987	151		0.371164	0.0512753	132		0.403682	0.067344	87
14.1501	0.393965	0.0624199	151		0.371629	0.0524459	132		0.404687	0.068536	87
14.2002	0.395058	0.0624341	151		0.370968	0.0536051	132		0.40433	0.0687229	87
14.2503	0.393805	0.0626577	151		0.373476	0.0551372	132		0.404346	0.0680623	87
14.3003	0.393086	0.0630472	151		0.371686	0.0550588	132		0.404189	0.0680321	87
14.3501	0.393278	0.0629666	151		0.3742	0.0564244	132		0.403638	0.0677789	87
14.4002	0.394272	0.0632648	151		0.373095	0.0552023	132		0.404366	0.0666641	87
14.4502	0.395331	0.0634959	151		0.373704	0.0549647	132		0.403009	0.0659013	87
14.5002	0.394444	0.0631862	151		0.373253	0.0549253	132		0.402628	0.0649311	87
14.5502	0.396177	0.0635436	151		0.375464	0.0547909	132		0.401718	0.0649323	87
14.6002	0.394425	0.0635443	151		0.37422	0.053954	132		0.403187	0.0655794	87
14.6501	0.393732	0.0634849	151		0.37431	0.0538114	132		0.40314	0.0647754	87
14.7001	0.395605	0.063302	151		0.375656	0.0551561	132		0.403262	0.0650558	87
14.75	0.395252	0.0634083	151		0.37703	0.0575376	132		0.403432	0.065061	87
14.8002	0.394998	0.0638185	151		0.376927	0.0578347	132		0.403141	0.0651166	87
14.8503	0.39649	0.0634449	151		0.377131	0.0573938	132		0.403179	0.0659493	87
14.9003	0.395858	0.0632843	151		0.3751	0.0552984	132		0.4043	0.0651654	87
14.95	0.395701	0.0637372	151		0.375592	0.055106	132		0.402821	0.0646706	87
15.0002	0.396187	0.0635648	151		0.375944	0.0548178	132		0.403618	0.0648693	87

## Sheet: Fig.2C
														Basal ratios
	MCF-7 ctrl				MCF-7 + BKCa - RFP				MCF-7 + BKCa-DEC - RFP					MCF-7
Time (min)	Average	SD	N (cells)		Average	SD	N (cells)		Average	SD	N (cells)			ctrl	+BKCa - RFP	+BKCa-DEC - RFP
0	0.167146	0.0190694	111		0.19507	0.0425511	117		0.204262	0.0435774	91			0.15964	0.164798	0.180738
0.0504617	0.167374	0.0190104	111		0.194693	0.041949	117		0.202649	0.0421443	91			0.161989	0.161248	0.200004
0.100048	0.167853	0.0190317	111		0.194296	0.0413136	117		0.201422	0.0413773	91			0.15311	0.16645	0.180907
0.15002	0.168358	0.0190885	111		0.194169	0.0406979	117		0.200473	0.0410855	91			0.180382	0.180452	0.170077
0.200158	0.168533	0.0192115	111		0.193606	0.0402643	117		0.199422	0.0404814	91			0.167864	0.171279	0.170506
0.250035	0.168826	0.0192979	111		0.193432	0.0398882	117		0.198708	0.0401225	91			0.157118	0.169722	0.166249
0.300268	0.168759	0.01936	111		0.192859	0.0393711	117		0.198525	0.0397681	91			0.175495	0.182268	0.164299
0.350172	0.169514	0.0194351	111		0.192903	0.0388473	117		0.197996	0.0396121	91			0.183222	0.17928	0.147977
0.400043	0.169275	0.0196643	111		0.192547	0.0383867	117		0.197607	0.039488	91			0.190423	0.180327	0.156346
0.450088	0.169001	0.0198262	111		0.192056	0.0380751	117		0.19751	0.0396421	91			0.166525	0.21436	0.169246
0.500032	0.169433	0.0198906	111		0.192179	0.037862	117		0.19757	0.0399296	91			0.184152	0.178942	0.187088
0.55005	0.169481	0.0197957	111		0.192076	0.0377934	117		0.197654	0.0399833	91			0.159538	0.188711	0.186563
0.600205	0.170238	0.019624	111		0.191403	0.0375684	117		0.197478	0.0398189	91			0.172867	0.32103	0.168555
0.650278	0.170083	0.0195572	111		0.191368	0.0369811	117		0.197586	0.0400294	91			0.174857	0.184141	0.186198
0.700083	0.170403	0.0195513	111		0.190826	0.0364466	117		0.197418	0.039943	91			0.166796	0.173017	0.154366
0.750152	0.170467	0.0196398	111		0.190797	0.036115	117		0.197344	0.0397722	91			0.189748	0.159785	0.167417
0.800192	0.17046	0.0197793	111		0.190607	0.0356843	117		0.197222	0.0394678	91			0.205461	0.217754	0.320217
0.850118	0.170373	0.0198801	111		0.191049	0.0354176	117		0.196905	0.0393905	91			0.181157	0.204822	0.202453
0.900162	0.170463	0.0199234	111		0.191019	0.0353212	117		0.196857	0.0392009	91			0.196185	0.20171	0.198231
0.950055	0.170318	0.0198963	111		0.191367	0.0353624	117		0.196464	0.0388709	91			0.157554	0.181955	0.169818
1.00022	0.170517	0.0200116	111		0.191141	0.035254	117		0.196142	0.0387367	91			0.172883	0.182487	0.170567
1.05013	0.170694	0.0200406	111		0.191068	0.0352395	117		0.196523	0.03869	91			0.190731	0.221847	0.181438
1.10013	0.170658	0.020148	111		0.19071	0.0349619	117		0.196501	0.0386692	91			0.198062	0.205349	0.179067
1.15013	0.170953	0.0201524	111		0.190199	0.0344726	117		0.196524	0.0384406	91			0.157249	0.16743	0.170454
1.20022	0.170569	0.0203531	111		0.189798	0.0339387	117		0.196289	0.0383744	91			0.168915	0.173736	0.159461
1.25002	0.170247	0.0205971	111		0.189521	0.0338337	117		0.196587	0.0381893	91			0.181883	0.169709	0.164998
1.30009	0.170769	0.020741	111		0.189343	0.0334222	117		0.196535	0.0381376	91			0.177322	0.164489	0.178172
1.35009	0.170841	0.0209108	111		0.189265	0.0330834	117		0.196874	0.0386116	91			0.170039	0.179662	0.169324
1.40024	0.170995	0.0208508	111		0.188841	0.0327929	117		0.196337	0.0385974	91			0.164251	0.164081	0.17999
1.45017	0.171361	0.0207964	111		0.188626	0.0326142	117		0.196505	0.0382537	91			0.197694	0.160562	0.191282
1.50004	0.17145	0.0206482	111		0.189007	0.0322556	117		0.195551	0.0379597	91			0.17908	0.158403	0.170288
1.55028	0.171335	0.0206033	111		0.18875	0.0319056	117		0.195524	0.0379641	91			0.194279	0.159694	0.222947
1.60012	0.171824	0.0204834	111		0.188846	0.0317098	117		0.195462	0.0377531	91			0.168196	0.1795	0.166178
1.65028	0.172168	0.0204248	111		0.188444	0.0316806	117		0.195012	0.0378785	91			0.170071	0.267705	0.15313
1.70012	0.172543	0.0202189	111		0.188206	0.0314495	117		0.195002	0.0378201	91			0.170285	0.194472	0.183182
1.75009	0.172301	0.0201125	111		0.188415	0.031296	117		0.195009	0.0378604	91			0.1556	0.204362	0.180554
1.80013	0.172649	0.0199185	111		0.188012	0.0309328	117		0.194857	0.037823	91			0.161144	0.177193	0.155809
1.85018	0.172491	0.0202681	111		0.188173	0.0305339	117		0.194735	0.0378611	91			0.167916	0.162089	0.201897
1.90022	0.173527	0.0206526	111		0.188424	0.0303841	117		0.194879	0.0379226	91			0.192641	0.182725	0.186751
1.95019	0.172457	0.0210564	111		0.188353	0.030488	117		0.194754	0.0379545	91			0.185272	0.175228	0.186516
2.00023	0.173307	0.0208833	111		0.188309	0.0305261	117		0.194645	0.0378743	91			0.1715	0.172296	0.186929
2.05024	0.173234	0.0207777	111		0.187924	0.0307955	117		0.194529	0.0376201	91			0.160869	0.167058	0.197312
2.10024	0.173246	0.0206686	111		0.187855	0.0306602	117		0.19432	0.0378988	91			0.178963	0.185042	0.197744
2.15028	0.173423	0.0207622	111		0.187735	0.0305827	117		0.194538	0.0381804	91			0.171437	0.188679	0.202224
2.20008	0.173435	0.020742	111		0.188231	0.0306444	117		0.194518	0.0381719	91			0.147985	0.180815	0.203951
2.25022	0.17369	0.0207014	111		0.187933	0.0305216	117		0.194357	0.038195	91			0.149746	0.178555	0.210806
2.30026	0.173645	0.0207308	111		0.187768	0.0300566	117		0.194131	0.0381776	91			0.140537	0.177285	0.214683
2.35003	0.173994	0.0207488	111		0.188122	0.0300048	117		0.194422	0.038457	91			0.169626	0.189564	0.193448
2.40016	0.174422	0.020876	111		0.188222	0.0300849	117		0.194345	0.0385573	91			0.200228	0.194278	0.249936
2.45023	0.174429	0.02097	111		0.188181	0.0300023	117		0.193848	0.0381894	91			0.164847	0.177411	0.188207
2.50027	0.174188	0.021029	111		0.187691	0.0296708	117		0.193738	0.0379794	91			0.171809	0.174758	0.191375
2.55008	0.174558	0.0210438	111		0.187779	0.029547	117		0.193177	0.037709	91			0.163562	0.166739	0.238828
2.60011	0.174684	0.020977	111		0.187747	0.029613	117		0.193286	0.0378938	91			0.147284	0.187531	0.31362
2.65022	0.174737	0.0210044	111		0.18783	0.0299946	117		0.193208	0.0378507	91			0.132976	0.180568	0.27223
2.70005	0.174488	0.0210224	111		0.188018	0.0306473	117		0.193125	0.0377138	91			0.141246	0.186061	0.194045
2.75016	0.174741	0.0211756	111		0.188368	0.031482	117		0.193029	0.0378198	91			0.153793	0.175597	0.20729
2.80026	0.17478	0.0216077	111		0.188164	0.0323347	117		0.193074	0.0380244	91			0.159477	0.184231	0.190978
2.8501	0.175183	0.0221232	111		0.188426	0.0327985	117		0.193384	0.0378116	91			0.164859	0.169367	0.168975
2.90027	0.175742	0.0226295	111		0.188386	0.0331547	117		0.193653	0.0379399	91			0.176737	0.164036	0.171937
2.95004	0.175206	0.0231094	111		0.188085	0.0331364	117		0.193842	0.0379679	91			0.195979	0.165824	0.184133
3.00011	0.176167	0.0240553	111		0.188196	0.0330467	117		0.194003	0.0382719	91			0.239161	0.209831	0.279205
3.05025	0.176675	0.0255087	111		0.187929	0.0329815	117		0.193665	0.038108	91			0.1811	0.198394	0.259051
3.10025	0.176963	0.0266452	111		0.188053	0.0329473	117		0.193259	0.0380386	91			0.240988	0.176268	0.343763
3.15006	0.176886	0.0269933	111		0.187786	0.0334371	117		0.193315	0.0381404	91			0.17478	0.154247	0.273377
3.20006	0.177186	0.0265391	111		0.187887	0.0335226	117		0.192754	0.0384525	91			0.195423	0.178114	0.19574
3.25017	0.176236	0.025826	111		0.188626	0.0335509	117		0.192877	0.038083	91			0.159237	0.179952	0.231974
3.30002	0.176433	0.0253836	111		0.188574	0.0338179	117		0.192749	0.037916	91			0.176034	0.166335	0.168909
3.35011	0.176685	0.025125	111		0.18858	0.0351899	117		0.192415	0.0384772	91			0.157467	0.179224	0.320988
3.40021	0.196384	0.0345182	111		0.189056	0.0381582	117		0.192315	0.0378086	91			0.160351	0.208724	0.161189
3.45008	0.176832	0.0345099	111		0.18936	0.039369	117		0.192757	0.0382132	91			0.149833	0.194539	0.166794
3.50002	0.177034	0.0345066	111		0.188804	0.0397618	117		0.192923	0.0383462	91			0.14373	0.178121	0.201549
3.55009	0.177063	0.0251063	111		0.188692	0.0398608	117		0.192805	0.0384925	91			0.153497	0.177734	0.198532
3.60006	0.177281	0.025006	111		0.189083	0.0400949	117		0.192216	0.0381567	91			0.163543	0.192756	0.200426
3.65017	0.177306	0.0248352	111		0.188634	0.0398733	117		0.192371	0.0382163	91			0.15845	0.164815	0.168693
3.7002	0.177587	0.0248604	111		0.188351	0.0402253	117		0.192575	0.0383741	91			0.191721	0.178737	0.179015
3.75024	0.177761	0.0250311	111		0.18861	0.040037	117		0.192226	0.0382101	91			0.200018	0.167832	0.237695
3.80021	0.177971	0.0256055	111		0.188743	0.0406095	117		0.192342	0.0382979	91			0.161716	0.174134	0.176938
3.85005	0.178245	0.0265704	111		0.18876	0.0408221	117		0.192627	0.0380899	91			0.170376	0.180595	0.18515
3.90012	0.17881	0.0277708	111		0.188645	0.04051	117		0.193095	0.0385068	91			0.170357	0.215446	0.173264
3.95006	0.178563	0.0285874	111		0.18849	0.0399718	117		0.192905	0.0383044	91			0.149077	0.199299	0.177257
4.00011	0.178431	0.0287457	111		0.188145	0.0393514	117		0.193203	0.0384682	91			0.175267	0.200053	0.184326
4.05028	0.178205	0.0282046	111		0.188131	0.0387031	117		0.193078	0.0385444	91			0.182036	0.158665	0.18726
4.10009	0.177642	0.0277473	111		0.187544	0.0383729	117		0.19337	0.0385507	91			0.242473	0.160783	0.187031
4.15022	0.178419	0.0273581	111		0.187459	0.0379292	117		0.19362	0.0389766	91			0.201364	0.163725	0.191717
4.20006	0.178519	0.0280604	111		0.187132	0.0373366	117		0.193459	0.039146	91			0.216777	0.393701	0.1868
4.2501	0.179337	0.0296285	111		0.187165	0.0370799	117		0.193685	0.0393282	91			0.194041	0.157876	0.177532
4.3002	0.178521	0.0315424	111		0.187438	0.037514	117		0.193971	0.0396958	91			0.196525	0.162916	0.193833
4.35006	0.178878	0.0323755	111		0.187817	0.0378259	117		0.193432	0.0396796	91			0.25813	0.168874	0.192973
4.40018	0.179125	0.032218	111		0.187553	0.0380281	117		0.193618	0.0398588	91			0.167487	0.185251	0.17872
4.45028	0.179476	0.031451	111		0.187849	0.0384186	117		0.193552	0.0396623	91			0.198887	0.207577	0.178366
4.50005	0.179322	0.0310046	111		0.187805	0.0393439	117		0.192944	0.0392337	91			0.197066	0.148693	0.193626
4.55006	0.179422	0.0307646	111		0.187997	0.0404924	117		0.192745	0.039181	91			0.175208	0.158413
4.6002	0.180337	0.03133	111		0.188282	0.0414633	117		0.192714	0.0389558	91			0.228698	0.167043
4.65017	0.18082	0.0332081	111		0.188123	0.0420691	117		0.192914	0.0389474	91			0.180001	0.157499
4.70024	0.181132	0.0356062	111		0.188162	0.0424293	117		0.19261	0.0389738	91			0.185768	0.199342
4.75028	0.181468	0.0377474	111		0.188334	0.0431034	117		0.192302	0.0389873	91			0.187586	0.176208
4.80028	0.181617	0.0387338	111		0.189115	0.045414	117		0.192612	0.0392868	91			0.182218	0.216741
4.85008	0.181752	0.039234	111		0.18909	0.0452775	117		0.19359	0.041744	91			0.209087	0.20836
4.90002	0.18156	0.0394951	111		0.188997	0.0446574	117		0.193724	0.0423617	91			0.177388	0.270961
4.95009	0.182667	0.0395924	111		0.188698	0.0435719	117		0.19356	0.0429329	91			0.151701	0.270019
5.00019	0.182909	0.0393093	111		0.18872	0.0429708	117		0.193169	0.0421779	91			0.140121	0.204991
5.05008	0.182345	0.0389014	111		0.188344	0.0422149	117		0.19278	0.0416443	91			0.136549	0.183111
5.10016	0.18296	0.038719	111		0.188481	0.0418921	117		0.192366	0.040928	91			0.149922	0.205087
5.15027	0.182419	0.0390143	111		0.188317	0.0420293	117		0.192366	0.0412571	91			0.162092	0.175422
5.20007	0.182359	0.0393858	111		0.188386	0.0421722	117		0.192465	0.042119	91			0.159774	0.199971
5.25017	0.182577	0.0397254	111		0.189091	0.0430105	117		0.192588	0.042707	91			0.158679	0.205594
5.30008	0.182864	0.0402418	111		0.193842	0.0455073	117		0.199246	0.0478787	91			0.151394	0.202324
5.35012	0.192459	0.0423282	111		0.275757	0.159196	117		0.298253	0.171021	91			0.161029	0.211613
5.40002	0.258242	0.0868421	111		0.411819	0.200541	117		0.442057	0.249843	91			0.17462	0.211158
5.45009	0.316068	0.137583	111		0.530695	0.196776	117		0.512523	0.292267	91			0.137456	0.233389
5.50023	0.352014	0.174114	111		0.584759	0.190609	117		0.546703	0.302875	91			0.185282	0.294781
5.55004	0.383548	0.194529	111		0.600821	0.181093	117		0.649036	0.266514	91				0.232859
5.60007	0.417131	0.19872	111		0.606032	0.177338	117		0.729749	0.210042	91				0.184429
5.65014	0.437145	0.195237	111		0.603289	0.173837	117		0.756695	0.194332	91				0.213407
5.70018	0.448373	0.19034	111		0.597869	0.170262	117		0.76629	0.189843	91				0.193332
5.7501	0.455182	0.188564	111		0.591435	0.16916	117		0.774808	0.19109	91				0.180931
5.80019	0.473419	0.183195	111		0.584253	0.168675	117		0.783822	0.199746	91				0.201741
5.85026	0.486247	0.175405	111		0.576254	0.168512	117		0.793166	0.209434	91
5.90003	0.492688	0.165331	111		0.567238	0.168832	117		0.804774	0.217658	91
5.95014	0.496322	0.158804	111		0.557303	0.167906	117		0.806207	0.221522	91
6.00024	0.496302	0.155031	111		0.549065	0.167911	117		0.806658	0.224632	91
6.05021	0.495145	0.153671	111		0.539092	0.167751	117		0.803611	0.226055	91
6.10018	0.492659	0.154101	111		0.528714	0.167554	117		0.799331	0.229361	91
6.15003	0.490683	0.154766	111		0.518471	0.166971	117		0.794159	0.232984	91
6.20029	0.486441	0.155082	111		0.50924	0.166763	117		0.786886	0.234966	91
6.25009	0.481345	0.154959	111		0.501475	0.166804	117		0.779413	0.23868	91
6.30026	0.474293	0.154085	111		0.494582	0.166166	117		0.77223	0.240769	91
6.35003	0.470633	0.15331	111		0.487487	0.165193	117		0.76329	0.241478	91
6.40007	0.466669	0.152672	111		0.480174	0.164747	117		0.753724	0.239974	91
6.45021	0.460685	0.152255	111		0.472032	0.164205	117		0.744629	0.238414	91
6.50024	0.455618	0.151647	111		0.464732	0.163318	117		0.733844	0.236169	91
6.55005	0.450729	0.150998	111		0.458848	0.163223	117		0.722866	0.234019	91
6.60012	0.446206	0.150498	111		0.452706	0.163199	117		0.713652	0.231806	91
6.65014	0.441286	0.149668	111		0.445584	0.161984	117		0.70371	0.228	91
6.70003	0.437192	0.148587	111		0.440198	0.161633	117		0.694687	0.225499	91
6.75023	0.432484	0.147626	111		0.436044	0.16168	117		0.685379	0.223644	91
6.80027	0.426985	0.146735	111		0.431284	0.160553	117		0.676692	0.221935	91
6.85008	0.421667	0.145558	111		0.427766	0.160315	117		0.666096	0.217696	91
6.90015	0.417813	0.144175	111		0.423674	0.159666	117		0.658012	0.21468	91
6.95025	0.412649	0.142836	111		0.420585	0.159368	117		0.650729	0.213396	91
7.00002	0.411203	0.142321	111		0.416844	0.15879	117		0.640771	0.210773	91
7.05013	0.407328	0.141807	111		0.414361	0.158489	117		0.633435	0.208403	91
7.10016	0.404095	0.141711	111		0.411597	0.157811	117		0.626321	0.206043	91
7.15023	0.399456	0.141057	111		0.40828	0.157048	117		0.617866	0.203159	91
7.20022	0.39596	0.140349	111		0.405237	0.156774	117		0.609405	0.200411	91
7.25004	0.391881	0.13929	111		0.402109	0.156413	117		0.60298	0.199444	91
7.30018	0.38805	0.137917	111		0.39893	0.155955	117		0.595702	0.196392	91
7.35007	0.384605	0.136473	111		0.396142	0.154992	117		0.587603	0.194367	91
7.40019	0.382135	0.135188	111		0.393247	0.154953	117		0.580375	0.19202	91
7.45003	0.379621	0.134101	111		0.390861	0.15399	117		0.572602	0.189432	91
7.50013	0.376975	0.132894	111		0.388254	0.152713	117		0.56606	0.187534	91
7.5502	0.373926	0.131735	111		0.385054	0.151429	117		0.559532	0.185915	91
7.60024	0.371577	0.130843	111		0.382813	0.150682	117		0.553008	0.184245	91
7.65008	0.368486	0.130009	111		0.380715	0.149762	117		0.546162	0.182918	91
7.70012	0.36711	0.129283	111		0.377654	0.148138	117		0.540657	0.180791	91
7.7501	0.364632	0.128179	111		0.374902	0.14674	117		0.534944	0.178822	91
7.80023	0.361332	0.126961	111		0.372552	0.145827	117		0.529424	0.176896	91
7.85023	0.359338	0.125427	111		0.370485	0.145156	117		0.523162	0.175043	91
7.90027	0.357503	0.124148	111		0.368274	0.144065	117		0.516125	0.172804	91
7.9501	0.355395	0.122977	111		0.366606	0.143001	117		0.511558	0.17186	91
8.00003	0.353555	0.122034	111		0.364582	0.142011	117		0.505802	0.169389	91
8.05005	0.351385	0.121132	111		0.362055	0.140839	117		0.500331	0.167287	91
8.10008	0.34998	0.120661	111		0.360356	0.13978	117		0.494899	0.165826	91
8.15002	0.348531	0.120307	111		0.358774	0.138858	117		0.489903	0.163329	91
8.20003	0.346738	0.12019	111		0.357448	0.13857	117		0.48644	0.163904	91
8.25009	0.345466	0.119876	111		0.356341	0.137719	117		0.480667	0.162805	91
8.30017	0.342908	0.119387	111		0.354298	0.136798	117		0.475485	0.160533	91
8.35005	0.340886	0.118586	111		0.35194	0.135584	117		0.471126	0.159397	91
8.40009	0.338868	0.117401	111		0.349995	0.134329	117		0.467192	0.15759	91
8.45008	0.33693	0.116411	111		0.348023	0.133577	117		0.462265	0.15568	91
8.50022	0.333541	0.115155	111		0.346356	0.132658	117		0.459659	0.156063	91
8.55004	0.335158	0.114778	111		0.344788	0.131763	117		0.457152	0.157306	91
8.60022	0.334406	0.114155	111		0.343532	0.131308	117		0.453724	0.155758	91
8.65005	0.332802	0.113737	111		0.342159	0.130176	117		0.450399	0.153182	91
8.70012	0.331445	0.112884	111		0.340728	0.129593	117		0.447087	0.152259	91
8.75019	0.329892	0.11216	111		0.339258	0.128851	117		0.443489	0.152434	91
8.80025	0.327946	0.111583	111		0.337641	0.128683	117		0.440996	0.153642	91
8.85028	0.326231	0.110849	111		0.337527	0.128536	117		0.438423	0.153444	91
8.90009	0.326087	0.110187	111		0.336649	0.128044	117		0.43361	0.150092	91
8.95009	0.324739	0.109599	111		0.334903	0.127165	117		0.431857	0.149437	91
9.00016	0.323585	0.108865	111		0.333674	0.126501	117		0.430464	0.151289	91
9.05003	0.322237	0.107915	111		0.332524	0.126251	117		0.429084	0.152159	91
9.10024	0.321124	0.106907	111		0.33005	0.125524	117		0.427605	0.154151	91
9.15016	0.32021	0.106028	111		0.328519	0.124392	117		0.428211	0.155934	91
9.20017	0.317956	0.105255	111		0.327074	0.123331	117		0.4268	0.158349	91
9.25014	0.31763	0.104472	111		0.3256	0.122586	117		0.424958	0.159859	91
9.30011	0.315303	0.103571	111		0.324575	0.121548	117		0.423474	0.161736	91
9.35005	0.315527	0.103057	111		0.32327	0.120748	117		0.421733	0.162102	91
9.40022	0.314093	0.102813	111		0.321949	0.120021	117		0.420038	0.160544	91
9.45006	0.314112	0.102855	111		0.320229	0.119517	117		0.418254	0.158306	91
9.50002	0.311434	0.102272	111		0.319648	0.11915	117		0.416954	0.157718	91
9.55012	0.311157	0.101754	111		0.318999	0.118948	117		0.415237	0.156314	91
9.60023	0.310243	0.101283	111		0.317819	0.118524	117		0.412041	0.153795	91
9.65006	0.310226	0.10122	111		0.317221	0.118361	117		0.410038	0.151936	91
9.70023	0.308742	0.100647	111		0.316817	0.117574	117		0.409487	0.151199	91
9.75014	0.307669	0.0999949	111		0.315519	0.116774	117		0.406527	0.148701	91
9.80004	0.305903	0.0990149	111		0.314745	0.115883	117		0.40563	0.147778	91
9.85011	0.305326	0.0986128	111		0.313145	0.114692	117		0.403205	0.147253	91
9.90005	0.304495	0.0979759	111		0.312291	0.114089	117		0.402353	0.149172	91
9.95009	0.304528	0.0977528	111		0.312023	0.113742	117		0.399447	0.146472	91
10.0001	0.304416	0.0974484	111		0.310408	0.112806	117		0.39756	0.145196	91
10.0502	0.304157	0.0972775	111		0.30975	0.11251	117		0.396148	0.144198	91
10.1001	0.302368	0.0968894	111		0.308699	0.111703	117		0.395688	0.143504	91
10.15	0.302759	0.0965169	111		0.308258	0.111601	117		0.394601	0.143353	91
10.2002	0.302067	0.0964789	111		0.308144	0.111131	117		0.393237	0.144845	91
10.2502	0.299395	0.0959289	111		0.307691	0.110773	117		0.391245	0.142627	91
10.3002	0.298802	0.0950274	111		0.307001	0.110408	117		0.389293	0.142383	91
10.3501	0.296771	0.0933561	111		0.305943	0.109927	117		0.387277	0.140034	91
10.4001	0.294744	0.092005	111		0.303929	0.108602	117		0.385064	0.139028	91
10.4502	0.292615	0.0908293	111		0.30153	0.106932	117		0.381502	0.138576	91
10.5002	0.28994	0.0895614	111		0.297311	0.104332	117		0.376947	0.137762	91
10.55	0.285983	0.0876025	111		0.291874	0.100676	117		0.370753	0.135282	91
10.6	0.281233	0.0848768	111		0.285226	0.0964359	117		0.362964	0.130893	91
10.6502	0.274018	0.0816584	111		0.278131	0.0921713	117		0.355286	0.129836	91
10.7001	0.269495	0.0782839	111		0.270451	0.0874958	117		0.345633	0.127571	91
10.7502	0.263205	0.0744989	111		0.263171	0.0832942	117		0.335704	0.12209	91
10.8002	0.25676	0.0709527	111		0.256837	0.0797413	117		0.326821	0.11832	91
10.8501	0.250517	0.0672899	111		0.250299	0.0762152	117		0.317927	0.115497	91
10.9002	0.245151	0.0638457	111		0.244754	0.0731539	117		0.308488	0.110823	91
10.9502	0.240176	0.0608442	111		0.239947	0.0704042	117		0.30012	0.10563	91
11.0001	0.235873	0.0584184	111		0.235349	0.0679868	117		0.291418	0.100185	91
11.0501	0.23165	0.056308	111		0.231969	0.0661168	117		0.284464	0.0955579	91
11.1002	0.228892	0.0544657	111		0.228766	0.0644461	117		0.278378	0.0924316	91
11.1501	0.225295	0.0529198	111		0.226176	0.0628257	117		0.272985	0.0892611	91
11.2002	0.222496	0.0518241	111		0.223915	0.061364	117		0.268446	0.0863169	91
11.2501	0.22053	0.0510035	111		0.221888	0.0602652	117		0.26386	0.0833655	91
11.3001	0.218309	0.0506029	111		0.220371	0.0592111	117		0.260349	0.0815221	91
11.35	0.216868	0.050342	111		0.218832	0.0583063	117		0.257624	0.0795401	91
11.4	0.215145	0.0499464	111		0.21851	0.058183	117		0.254558	0.0776956	91
11.4502	0.213633	0.0492895	111		0.21755	0.0579887	117		0.252654	0.0763551	91
11.5001	0.212383	0.0485462	111		0.216864	0.0574184	117		0.249713	0.0749337	91
11.5502	0.211656	0.0478629	111		0.215938	0.0572054	117		0.247908	0.074004	91
11.6001	0.210725	0.0472943	111		0.215334	0.056827	117		0.24599	0.0730198	91
11.6501	0.20965	0.0471316	111		0.21462	0.0569663	117		0.245153	0.0724346	91
11.7001	0.208759	0.0472259	111		0.21411	0.056688	117		0.243329	0.0712812	91
11.7502	0.20943	0.04774	111		0.213045	0.0567033	117		0.242034	0.0700402	91
11.8001	0.208744	0.0479462	111		0.212306	0.0565657	117		0.240003	0.0695671	91
11.8501	0.207329	0.0482986	111		0.211814	0.0566954	117		0.238954	0.0689194	91
11.9002	0.206708	0.0481791	111		0.21185	0.0564289	117		0.237446	0.0685172	91
11.9501	0.206778	0.0484034	111		0.21156	0.0563561	117		0.236108	0.0678646	91
12.0002	0.205687	0.0483319	111		0.210744	0.0564302	117		0.23476	0.0677078	91
12.0502	0.204927	0.0481967	111		0.209784	0.0560333	117		0.233377	0.0672829	91
12.1001	0.204233	0.0476291	111		0.209792	0.0560692	117		0.233052	0.0662732	91
12.1501	0.204405	0.0471568	111		0.209503	0.0552972	117		0.231611	0.0659776	91
12.2	0.204068	0.0471068	111		0.209515	0.0551548	117		0.230721	0.0655811	91
12.2502	0.203017	0.0473106	111		0.208503	0.0544285	117		0.230382	0.0652988	91
12.3002	0.20287	0.0475746	111		0.208537	0.0539732	117		0.229089	0.064659	91
12.3502	0.20192	0.0473892	111		0.208524	0.0552787	117		0.229035	0.0638356	91
12.4002	0.20075	0.046934	111		0.208067	0.0571435	117		0.227677	0.06325	91
12.4501	0.201285	0.0463409	111		0.208133	0.0581433	117		0.226755	0.0625558	91
12.5002	0.200735	0.0461043	111		0.208164	0.0602217	117		0.226625	0.0621162	91
12.5502	0.200356	0.0458744	111		0.207868	0.0610446	117		0.226274	0.0614029	91
12.6001	0.200144	0.0456177	111		0.208034	0.0613468	117		0.225568	0.0609056	91
12.6501	0.199725	0.0452915	111		0.207454	0.0606908	117		0.224219	0.0605866	91
12.7001	0.199026	0.0453985	111		0.207274	0.059481	117		0.223875	0.0601969	91
12.7503	0.19865	0.0454617	111		0.206585	0.058783	117		0.223288	0.0603559	91
12.8001	0.198132	0.045322	111		0.206143	0.0580689	117		0.221862	0.0594695	91
12.8501	0.197826	0.0448893	111		0.206105	0.0585369	117		0.221585	0.0591795	91
12.9001	0.197738	0.0445799	111		0.205889	0.0592413	117		0.220841	0.0588087	91
12.9501	0.197865	0.0444369	111		0.20575	0.0591218	117		0.22047	0.0585663	91
13.0002	0.198138	0.0444027	111		0.206156	0.0588274	117		0.220056	0.0585054	91
13.0502	0.197307	0.0442637	111		0.205768	0.0584259	117		0.219788	0.058121	91
13.1	0.197996	0.044115	111		0.204632	0.0578176	117		0.219292	0.0579909	91
13.1501	0.197661	0.0439619	111		0.204294	0.0578993	117		0.218792	0.0576799	91
13.2001	0.197131	0.043983	111		0.204185	0.0584137	117		0.217808	0.0573029	91
13.2501	0.19724	0.0443478	111		0.204021	0.0593878	117		0.21767	0.0570655	91
13.3001	0.196568	0.044886	111		0.204105	0.0599349	117		0.2168	0.0568087	91
13.3502	0.196513	0.0454585	111		0.203793	0.0600256	117		0.216448	0.0563793	91
13.4002	0.196066	0.0457437	111		0.203392	0.0602391	117		0.216364	0.0565942	91
13.4502	0.195607	0.0458509	111		0.202575	0.0600694	117		0.215856	0.0577748	91
13.5003	0.195573	0.045882	111		0.202275	0.0601925	117		0.216324	0.0593303	91
13.5501	0.196343	0.0460408	111		0.201466	0.0601265	117		0.216207	0.0592939	91
13.6001	0.196247	0.0459793	111		0.201638	0.0598274	117		0.215359	0.0583229	91
13.6502	0.195957	0.0457829	111		0.201413	0.058813	117		0.21481	0.0577293	91
13.7003	0.195601	0.0454156	111		0.200606	0.0578001	117		0.213921	0.0566763	91
13.7503	0.196378	0.0456394	111		0.201126	0.0573386	117		0.214345	0.0560535	91
13.8003	0.196295	0.046178	111		0.200949	0.0568345	117		0.213631	0.0551582	91
13.85	0.195737	0.0470036	111		0.200446	0.0563662	117		0.213525	0.0548372	91
13.9001	0.196445	0.0477137	111		0.200607	0.0559128	117		0.213536	0.0541986	91
13.9502	0.19635	0.0484547	111		0.20042	0.0554188	117		0.213299	0.0540972	91
14.0002	0.196112	0.0486833	111		0.20031	0.0550483	117		0.213344	0.0540585	91
14.0501	0.195645	0.0485049	111		0.200168	0.054807	117		0.212703	0.0534215	91
14.1002	0.195411	0.0479135	111		0.199742	0.0547945	117		0.212355	0.0529565	91
14.1501	0.195146	0.0474542	111		0.199283	0.0548506	117		0.211948	0.0525806	91
14.2002	0.194749	0.047157	111		0.19902	0.0543957	117		0.211705	0.0523364	91
14.2503	0.194608	0.0471726	111		0.198793	0.0541369	117		0.21189	0.0523335	91
14.3003	0.194399	0.0475133	111		0.198844	0.0540611	117		0.211602	0.0518486	91
14.3501	0.193686	0.0476073	111		0.198508	0.0545225	117		0.211198	0.0514419	91
14.4002	0.194128	0.0478112	111		0.198162	0.0545097	117		0.210854	0.0509503	91
14.4502	0.195843	0.0480937	111		0.198197	0.0542394	117		0.210679	0.0508622	91
14.5002	0.195009	0.0486784	111		0.19825	0.0536857	117		0.210453	0.0511582	91
14.5502	0.195505	0.0493153	111		0.197685	0.0534894	117		0.209967	0.05095	91
14.6002	0.195382	0.0501402	111		0.197367	0.0530355	117		0.209809	0.05108	91
14.6501	0.195359	0.0509526	111		0.197389	0.0525421	117		0.209475	0.0509502	91
14.7001	0.195673	0.051641	111		0.196897	0.0522144	117		0.209565	0.0511058	91
14.75	0.19475	0.052083	111		0.196132	0.0518408	117		0.209086	0.0513666	91
14.8002	0.195082	0.0528063	111		0.196341	0.0513948	117		0.209138	0.0511711	91
14.8503	0.195011	0.0534633	111		0.195686	0.0512148	117		0.208753	0.0509113	91
14.9003	0.194748	0.0539554	111		0.19572	0.0512085	117		0.208482	0.0507235	91
14.95	0.194731	0.0542633	111		0.195066	0.0511068	117		0.207748	0.0502919	91

## Sheet: Fig.2D
										Basal ratios
	MMTV-PyMT WT				MMTV-PyMT BK-KO					WT				BK-KO
Time (min)	Average	SD	N (cells)		Average	SD	N (cells)			ctrl	+ PAX	+ IBTX		ctrl	+ PAX	+ IBTX
0	0.376384	0.201726	116		0.530371	0.198306	117			0.429233	0.421957	0.682017		0.318271	0.730561	0.620123
0.050198	0.379375	0.20734	116		0.527221	0.200602	117			0.554554	0.508497	0.572664		0.755811	0.746293	0.651814
0.100443	0.385014	0.20679	116		0.533018	0.190288	117			0.325543	0.314393	0.395072		0.764465	0.885876	0.146239
0.150362	0.380033	0.20445	116		0.526343	0.190567	117			0.385506	0.240505	0.598237		0.696441	0.739179	0.286927
0.200353	0.376613	0.20426	116		0.526806	0.195199	117			0.055652	0.079786	0.415386		0.826065	0.614641	0.473286
0.250397	0.383575	0.205077	116		0.532001	0.191382	117			0.74186	0.119468	0.582832		0.824357	0.505341	0.531355
0.300438	0.384099	0.206214	116		0.527896	0.200013	117			0.70281	0.400195	0.536816		0.453402	0.49783	0.589745
0.350303	0.383713	0.206352	116		0.539339	0.201008	117			0.906612	0.525835	0.407132		0.285096	0.376375	0.524445
0.400228	0.385619	0.205932	116		0.530622	0.195763	117			0.686998	0.455551	0.352784		0.370923	0.368791	0.312237
0.450327	0.387221	0.20888	116		0.532462	0.193513	117			0.374994	0.521011	0.54578		0.740885	0.258436	0.402862
0.500275	0.386538	0.205727	116		0.5638	0.235573	117			0.46219	0.545465	0.336711		0.451539	0.203366	0.394788
0.550318	0.386043	0.207037	116		0.534313	0.1993	117			0.410735	0.561413	0.323955		0.697273	0.188939	0.432465
0.600248	0.385394	0.206519	116		0.537982	0.193309	117			0.622667	0.813477	0.141559		0.507595	0.390135	0.592871
0.650303	0.389288	0.205937	116		0.54273	0.198497	117			0.612835	0.777891	0.30805		0.606654	0.448678	0.343512
0.700385	0.384646	0.204832	116		0.526308	0.191482	117			0.710715	0.682494	0.441641		0.651145	0.496707	0.414657
0.750352	0.382423	0.204064	116		0.537843	0.206412	117			0.642429	0.561738	0.213353		0.639518	0.670827	0.575469
0.800272	0.383715	0.208243	116		0.544534	0.195364	117			0.416343	0.334992	0.328907		0.558407	0.81567	0.749883
0.850187	0.384378	0.204923	116		0.538697	0.199515	117			0.289375	0.560328	0.649677		0.462703	0.746533	0.736398
0.900233	0.387995	0.202904	116		0.538175	0.198154	117			0.283719	0.392668	0.468237		0.48053	0.528362	0.46237
0.950437	0.387945	0.204997	116		0.537305	0.198498	117			0.365199	0.371195	0.416424		0.390628	0.564852	0.561613
1.00036	0.39017	0.207101	116		0.537332	0.198647	117			0.479088	0.541181	0.480898		0.671074	0.632035	0.887479
1.05022	0.3873	0.204807	116		0.538753	0.19491	117			0.730653	0.341217	0.557763		0.468012	0.760201	0.856222
1.10041	0.3883	0.204935	116		0.537903	0.186276	117			0.218398	0.488259	0.593988		0.315836	0.567141	0.816463
1.15037	0.388497	0.208203	116		0.538695	0.200036	117			0.239025	0.441865	0.414337		0.388099	0.510404	0.744164
1.20043	0.391394	0.204998	116		0.534954	0.192453	117			0.512241	0.344479	0.561503		0.53244	0.750655	0.77895
1.25024	0.386297	0.20819	116		0.543997	0.194817	117			0.654702	0.347498	0.354912		0.552312	0.823788	0.788029
1.30022	0.387822	0.205143	116		0.540955	0.193991	117			0.110313	0.272707	0.373518		0.923981	0.463286	0.687062
1.35043	0.38219	0.203561	116		0.541184	0.202676	117			0.106799	0.328109	0.18165		0.455076	0.546937	0.497048
1.40022	0.387636	0.207176	116		0.534545	0.194896	117			0.200211	0.553877	0.287312		0.608383	0.602363	0.732541
1.45023	0.387726	0.202441	116		0.545941	0.202132	117			0.146542	0.25879	0.216151		0.858086	0.383203	0.526501
1.50026	0.386868	0.203703	116		0.538137	0.192026	117			0.14461	0.180002	0.284166		0.272566	0.727394	0.443623
1.55033	0.383966	0.20539	116		0.53749	0.196255	117			0.090857	0.581032	0.248048		0.811807	0.254055	0.642212
1.60025	0.388742	0.203563	116		0.53351	0.198595	117			0.443755	0.520348	0.176952		0.655518	0.339255	0.450412
1.65027	0.387302	0.207378	116		0.531148	0.194005	117			0.676804	0.587993	0.231981		0.625509	0.556132	0.511832
1.70046	0.383825	0.203605	116		0.533822	0.196697	117			0.612872	0.55115	0.294712		0.504514	0.1874	0.533238
1.75064	0.382823	0.20276	116		0.532383	0.195237	117			0.429634	0.47846	0.63933		0.400178	0.122145	0.340621
1.80034	0.385915	0.205031	116		0.519695	0.18474	117			0.23284	0.661345	0.520052		0.686696	0.483061	0.624708
1.85034	0.379452	0.204687	116		0.527805	0.189585	117			0.183938	0.740405	0.594696		0.507481	0.104038	0.493911
1.90037	0.386572	0.205486	116		0.535273	0.196832	117			0.286102	0.469473	0.573682		0.554399	0.556786	0.489387
1.95043	0.389068	0.206704	116		0.537545	0.195203	117			0.271479	0.674595	0.358343		0.486715	0.508559	0.585707
2.00046	0.38479	0.206736	116		0.53811	0.205465	117			0.418808	0.541427	0.443422		0.478373	0.808053	0.656993
2.05032	0.380637	0.20192	116		0.533945	0.203807	117			0.10132	0.415764	0.154817		0.263956	0.199556	0.345282
2.1004	0.390051	0.205483	116		0.531557	0.197273	117			0.463133	0.3788	0.565141		0.354545	0.382063	0.402815
2.15029	0.381913	0.204173	116		0.529593	0.191119	117			0.567331	0.785155	0.554854		0.406088	0.454458	0.554446
2.20032	0.38347	0.203374	116		0.53137	0.198427	117			0.411109	0.637321	0.582946		0.320903	0.314574	0.496719
2.25036	0.380051	0.205359	116		0.535485	0.197129	117			0.263779	0.336135	0.264997		0.409735	0.513639	0.036363
2.30042	0.383515	0.202552	116		0.532905	0.198045	117			0.101348	0.579648	0.42357		0.445538	0.126574	0.387179
2.35045	0.383371	0.200826	116		0.53186	0.197279	117			0.134354	0.544426	0.452306		0.18337	0.435658	0.546969
2.40039	0.386265	0.205316	116		0.70209	0.422334	117			0.352997	0.265448	0.279302		0.612121	0.438117	0.388635
2.45037	0.383562	0.204874	116		0.533232	0.200406	117			0.437933	0.678554	0.407398		0.625615	0.608054	0.599387
2.50033	0.383904	0.203782	116		0.5305	0.197113	117			0.43639	0.815095	0.511012		0.509354	0.152322	0.703677
2.55029	0.386126	0.203842	116		0.535628	0.202683	117			0.259388	0.735392	0.537441		0.358867	0.448389	0.593426
2.60034	0.382834	0.2058	116		0.533419	0.196975	117			0.3792	0.622725	0.816016		0.45164	0.297917	0.436814
2.65021	0.382648	0.20524	116		0.532802	0.193909	117			0.392542	0.402014	0.72627		0.391112	0.516608	0.38288
2.70033	0.384486	0.203894	116		0.535259	0.197925	117			0.286049	0.653385	0.657247		0.657273	0.063022	0.303078
2.75045	0.382002	0.204641	116		0.5338	0.202199	117			0.155694	0.368804	0.739514		0.633221	0.252595	0.666368
2.80046	0.384306	0.205671	116		0.523763	0.191202	117			0.272934	0.504631	0.54434		0.292767	0.538677	0.560579
2.85045	0.386962	0.205229	116		0.53137	0.193058	117			0.485013	0.874365	0.658123		0.283917	0.593275	0.537879
2.90028	0.378949	0.204672	116		0.529311	0.196152	117			0.13889	0.56579	0.236774		0.376288	0.667853	0.593948
2.95042	0.383565	0.206464	116		0.530392	0.19811	117			0.704151	0.497023	0.524159		0.499445	0.509249	0.315716
3.00027	0.378121	0.207589	116		0.525357	0.188284	117			0.397403	0.578632	0.679986		0.523573	0.677833	0.550543
3.0504	0.379476	0.203266	116		0.526202	0.20041	117			0.373745	0.381754	0.373229		0.612236	0.447525	0.576656
3.10027	0.378376	0.202089	116		0.523677	0.194529	117			0.385283	0.348869	0.593892		0.546121	0.419989	0.507763
3.15035	0.379819	0.203418	116		0.523291	0.191333	117			0.334029	0.323025	0.662035		0.623873	0.443496	0.441814
3.20027	0.380396	0.204567	116		0.526386	0.195746	117			0.422593	0.331583	0.771066		0.592874	0.494279	0.363996
3.25042	0.382549	0.205957	116		0.518784	0.187721	117			0.448019	0.229044	0.38464		0.641119	0.584599	0.515472
3.30044	0.38253	0.204956	116		0.527028	0.200356	117			0.431973	0.0877638	0.392545		0.375746	0.767234	0.184143
3.35033	0.382429	0.203875	116		0.522724	0.195553	117			0.381355	0.517098	0.482975		0.469103	0.505899	0.207423
3.40022	0.385571	0.20053	116		0.533909	0.200935	117			0.282018	0.389492	0.309863		0.518776	0.379365	0.017201
3.45036	0.374883	0.204265	116		0.519593	0.190175	117			0.713856	0.443874	0.72996		0.30144	0.623782	0.776256
3.50037	0.378096	0.202201	116		0.522184	0.189564	117			0.667374	0.576432	0.428876		0.453327	0.535131	0.343508
3.55024	0.375182	0.202678	116		0.52202	0.188897	117			0.674383		0.550526		0.516557	0.576425	0.652208
3.60021	0.374244	0.203014	116		0.515162	0.191214	117			0.500625		0.615083		0.374178	0.268506	0.290269
3.65032	0.374939	0.202931	116		0.521108	0.189722	117			0.691658		0.48179		0.301113	0.525698	0.849817
3.70019	0.370826	0.200858	116		0.525271	0.197027	117			0.718565		0.467826		0.596554	0.280525	0.796685
3.7504	0.371487	0.2051	116		0.507406	0.18882	117			0.278348		0.612667		0.417816	0.322515	0.819529
3.80028	0.368917	0.203278	116		0.516092	0.19296	117			0.346674		0.250556		0.662094	0.488278	0.669323
3.85038	0.374196	0.206286	116		0.514988	0.194503	117			0.613064		0.700253		0.104018	0.831224	0.574236
3.90033	0.370819	0.204174	116		0.506927	0.190767	117			0.620656		0.634017		0.833998	0.553943	0.429433
3.95041	0.366234	0.201106	116		0.506126	0.184226	117			0.219246		0.268837		0.430376	1.10208	0.352146
4.00021	0.36213	0.200641	116		0.518152	0.199565	117			0.693819		0.59547		0.409711	0.704198	0.757191
4.05028	0.363807	0.200562	116		0.511328	0.192993	117			0.634261		0.486331		0.616892	0.706267	0.641377
4.10033	0.356674	0.199631	116		0.498029	0.187838	117			0.590227		0.325509		0.570125	0.592537	0.654206
4.15035	0.360351	0.199767	116		0.503859	0.194593	117			-0.01942		0.146903		0.691407	0.614472	0.393297
4.20045	0.360489	0.197633	116		0.498866	0.191618	117			-0.02001		0.354304		0.516666	0.512188	0.554169
4.25041	0.360036	0.199295	116		0.49704	0.184593	117			0.227314		0.33442		0.595866	0.749076	0.798155
4.30033	0.358284	0.197322	116		0.497486	0.181161	117			0.221684		0.506757		0.730735	0.537912
4.3503	0.356697	0.201225	116		0.49223	0.184304	117			0.205372		0.0478987		0.337899	0.78551
4.40046	0.35863	0.200444	116		0.485759	0.177611	117			0.140486		0.132654		0.309061	0.726494
4.45021	0.353976	0.19793	116		0.483238	0.18081	117			0.21359		0.183735		0.668485	0.377863
4.50045	0.356654	0.198706	116		0.488577	0.18266	117			0.176077		0.303403		0.628952	0.530712
4.55027	0.354976	0.199886	116		0.480033	0.175348	117			0.117465		0.327785		0.282598	0.367665
4.60038	0.352985	0.194864	116		0.481264	0.177593	117			0.131802		0.184232		0.404156
4.6503	0.350759	0.196011	116		0.471487	0.170395	117			0.622937		0.166869		0.601847
4.70044	0.348207	0.19341	116		0.475666	0.177397	117			0.563551		0.0209468		0.416479
4.75026	0.354359	0.194728	116		0.47168	0.175652	117			0.728092		0.196138		0.399785
4.80021	0.345838	0.190911	116		0.469005	0.171789	117			0.077759		0.196194		0.492352
4.85023	0.344722	0.197225	116		0.477641	0.184759	117			0.552351		0.289749		0.348019
4.90026	0.342887	0.193677	116		0.465085	0.177914	117			0.57903		0.133613		0.61387
4.95009	0.339931	0.190074	116		0.458965	0.172169	117			0.209203		0.335784		0.770117
5.00035	0.341661	0.192334	116		0.4561	0.177078	117			0.118636		0.262096		0.703862
5.05044	0.339268	0.192195	116		0.456422	0.172501	117			0.392676		0.286508		0.30255
5.10036	0.3411	0.191618	116		0.448404	0.176498	117			0.191997				0.21187
5.15037	0.33894	0.191088	116		0.451755	0.169668	117			0.478561				0.623311
5.20047	0.337896	0.188993	116		0.45349	0.178096	117			0.620399				0.963642
5.25039	0.339443	0.191075	116		0.442309	0.168584	117			0.253617				0.801981
5.30028	0.336138	0.186379	116		0.43996	0.167996	117			0.580656				0.806535
5.35029	0.333738	0.188548	116		0.441534	0.166692	117			0.349862				0.709213
5.40043	0.335625	0.189812	116		0.442086	0.174688	117			0.268434				0.722227
5.4503	0.334641	0.189095	116		0.43827	0.170903	117			0.388265				0.554679
5.50035	0.32678	0.188396	116		0.439765	0.17243	117			0.132023				0.97659
5.55029	0.332068	0.186031	116		0.43822	0.172941	117			0.220514				0.779426
5.60029	0.327817	0.186861	116		0.438941	0.17107	117			0.194834				0.425666
5.65035	0.330639	0.185231	116		0.433835	0.171528	117			0.261054				0.39035
5.70024	0.329742	0.187756	116		0.424958	0.170025	117			0.249654				0.309299
5.75017	0.333238	0.185905	116		0.425919	0.167502	117			0.225752				0.279342
5.80028	0.325098	0.184209	116		0.42593	0.170834	117							1.39842
5.85041	0.32475	0.184988	116		0.425323	0.169045	117
5.90043	0.326869	0.187537	116		0.418157	0.168944	117
5.95029	0.32484	0.182323	116		0.426996	0.170892	117
6.00037	0.322958	0.183319	116		0.412093	0.165086	117
6.05029	0.325052	0.182383	116		0.419685	0.168277	117
6.10044	0.322972	0.180641	116		0.417326	0.165726	117
6.15027	0.329317	0.183327	116		0.413248	0.16569	117
6.20031	0.318405	0.179185	116		0.408876	0.165653	117
6.25045	0.322522	0.180373	116		0.402411	0.164176	117
6.30025	0.314072	0.176304	116		0.406578	0.167263	117
6.35028	0.31912	0.178646	116		0.408864	0.167516	117
6.40038	0.313897	0.179904	116		0.410319	0.168769	117
6.45022	0.314267	0.174606	116		0.410141	0.16515	117
6.50037	0.31575	0.178027	116		0.40814	0.166373	117
6.5503	0.312351	0.178228	116		0.401511	0.170395	117
6.60037	0.309946	0.176466	116		0.404106	0.169365	117
6.65027	0.311814	0.174566	116		0.403328	0.166997	117
6.70043	0.309645	0.174847	116		0.395152	0.165392	117
6.75042	0.31522	0.173743	116		0.40421	0.167964	117
6.80026	0.310901	0.173718	116		0.403552	0.170964	117
6.85035	0.315387	0.177234	116		0.406375	0.168852	117
6.90043	0.309389	0.174257	116		0.396567	0.166091	117
6.95033	0.313036	0.175589	116		0.398995	0.168966	117
7.00041	0.312806	0.175591	116		0.40009	0.168536	117
7.05032	0.308977	0.174389	116		0.3928	0.167173	117
7.10039	0.306199	0.176096	116		0.393939	0.166789	117
7.1502	0.311991	0.176393	116		0.387575	0.164675	117
7.20031	0.301962	0.17253	116		0.39475	0.166021	117
7.25033	0.30674	0.174621	116		0.390833	0.163269	117
7.30018	0.312647	0.173963	116		0.389515	0.165386	117
7.35035	0.302374	0.170722	116		0.380571	0.163046	117
7.40027	0.30251	0.171504	116		0.38962	0.167286	117
7.45045	0.302086	0.17052	116		0.390347	0.162893	117
7.50025	0.309139	0.171049	116		0.389454	0.164856	117
7.55029	0.295092	0.168398	116		0.396441	0.165854	117
7.60025	0.305496	0.171076	116		0.386663	0.16146	117
7.65034	0.303177	0.170536	116		0.432375	0.199344	117
7.70022	0.30146	0.171302	116		0.382546	0.164347	117
7.7503	0.296254	0.167688	116		0.379859	0.162832	117
7.80021	0.297894	0.169125	116		0.385163	0.163171	117
7.85032	0.30228	0.170404	116		0.390573	0.170759	117
7.90041	0.300331	0.169232	116		0.500533	0.310354	117
7.95033	0.300912	0.167942	116		0.378688	0.164659	117
8.0002	0.296982	0.16645	116		0.377621	0.161668	117
8.05046	0.297769	0.168854	116		0.378652	0.167812	117
8.1004	0.293331	0.167259	116		0.37422	0.161418	117
8.15025	0.29361	0.16778	116		0.37599	0.165215	117
8.20035	0.297373	0.166855	116		0.367337	0.160339	117
8.25028	0.295669	0.16466	116		0.374241	0.163473	117
8.30034	0.299767	0.168748	116		0.3697	0.161387	117
8.35039	0.298121	0.167924	116		0.371337	0.161233	117
8.40042	0.300325	0.167485	116		0.370156	0.16514	117
8.4504	0.29574	0.16384	116		0.369601	0.162945	117
8.50029	0.296823	0.167705	116		0.369182	0.16332	117
8.55028	0.289416	0.165154	116		0.363349	0.158331	117
8.60032	0.291146	0.168751	116		0.37065	0.160997	117
8.65036	0.294052	0.165587	116		0.362732	0.162172	117
8.70053	0.289575	0.16589	116		0.373493	0.164076	117
8.75041	0.285228	0.163195	116		0.36228	0.156064	117
8.80024	0.281612	0.164718	116		0.358765	0.160672	117
8.85031	0.280655	0.163813	116		0.352858	0.15737	117
8.90047	0.277373	0.163591	116		0.355417	0.157715	117
8.95031	0.283024	0.162263	116		0.34799	0.154408	117
9.00023	0.280678	0.160012	116		0.340846	0.158726	117
9.05043	0.271678	0.161737	116		0.341486	0.156572	117
9.10023	0.272905	0.160206	116		0.336679	0.151831	117
9.15032	0.277826	0.163361	116		0.327719	0.157148	117
9.20027	0.267845	0.157868	116		0.330653	0.151257	117
9.25038	0.268497	0.157261	116		0.318305	0.149722	117
9.30021	0.266546	0.159876	116		0.316332	0.150841	117
9.35046	0.264022	0.156269	116		0.307605	0.146244	117
9.40025	0.259199	0.156307	116		0.301925	0.147516	117
9.45042	0.257262	0.154393	116		0.304717	0.146292	117
9.50034	0.252114	0.155651	116		0.293287	0.142827	117
9.55035	0.255409	0.154035	116		0.285008	0.140551	117
9.60023	0.248371	0.152092	116		0.282003	0.137664	117
9.65042	0.2482	0.154092	116		0.280005	0.141896	117
9.70028	0.245163	0.152692	116		0.275051	0.136404	117
9.75032	0.241454	0.152193	116		0.269269	0.136325	117
9.80043	0.24246	0.149697	116		0.262497	0.13358	117
9.85026	0.238098	0.151151	116		0.256289	0.129314	117
9.90043	0.236333	0.148716	116		0.25919	0.131046	117
9.95027	0.267339	0.170826	116		0.257116	0.136493	117
10.0003	0.229607	0.144887	116		0.25632	0.135497	117
10.0503	0.222115	0.144168	116		0.249598	0.130058	117
10.1004	0.227121	0.144009	116		0.244645	0.12846	117
10.1505	0.219549	0.145781	116		0.235701	0.127576	117
10.2003	0.215468	0.13944	116		0.237343	0.128586	117
10.2502	0.216007	0.13685	116		0.232808	0.125429	117
10.3004	0.214201	0.135396	116		0.221307	0.122187	117
10.3503	0.212492	0.141248	116		0.22357	0.122313	117
10.4003	0.201757	0.137307	116		0.227924	0.124585	117
10.4504	0.201406	0.14068	116		0.214459	0.120267	117
10.5005	0.2014	0.136542	116		0.215731	0.125314	117
10.5504	0.198263	0.139429	116		0.213539	0.121973	117
10.6004	0.191281	0.134793	116		0.213016	0.119825	117
10.6502	0.192092	0.138003	116		0.207763	0.117761	117
10.7003	0.192549	0.136484	116		0.204482	0.118269	117
10.7503	0.190859	0.133895	116		0.198423	0.117177	117
10.8004	0.185232	0.13544	116		0.193155	0.113174	117
10.8503	0.186811	0.13679	116		0.195778	0.117326	117
10.9003	0.186888	0.133281	116		0.197837	0.113103	117
10.9505	0.185874	0.133017	116		0.193652	0.115322	117
11.0003	0.179918	0.133932	116		0.187915	0.113113	117
11.0504	0.171368	0.128574	116		0.184954	0.112028	117
11.1005	0.170462	0.132101	116		0.185612	0.115782	117
11.1504	0.174265	0.130676	116		0.185693	0.109407	117
11.2002	0.173004	0.13342	116		0.178221	0.112948	117
11.2504	0.169326	0.129048	116		0.172528	0.10489	117
11.3002	0.170055	0.128404	116		0.185232	0.1123	117
11.3504	0.168667	0.128956	116		0.172741	0.109882	117
11.4004	0.167522	0.133143	116		0.175275	0.113455	117
11.4503	0.163561	0.124708	116		0.168473	0.106555	117
11.5004	0.163979	0.130404	116		0.16814	0.105952	117
11.5502	0.151045	0.126227	116		0.168769	0.105787	117
11.6004	0.159452	0.124119	116		0.164977	0.103986	117
11.6503	0.159935	0.123133	116		0.163127	0.103634	117
11.7004	0.157549	0.126322	116		0.161268	0.103202	117
11.7503	0.157883	0.127005	116		0.152589	0.0992203	117
11.8003	0.148522	0.11856	116		0.152767	0.102775	117
11.8504	0.153861	0.119515	116		0.151786	0.101988	117
11.9003	0.151726	0.118902	116		0.156334	0.102392	117
11.9503	0.141055	0.119376	116		0.155899	0.10567	117
12.0003	0.144934	0.120628	116		0.144153	0.0964798	117
12.0503	0.146318	0.120881	116		0.147416	0.097827	117
12.1002	0.140532	0.11789	116		0.138858	0.0962593	117
12.1504	0.145758	0.11997	116		0.138801	0.0966383	117
12.2005	0.141894	0.117021	116		0.147568	0.0971976	117
12.2504	0.141458	0.116431	116		0.134944	0.0887069	117
12.3003	0.135461	0.112422	116		0.135458	0.0930549	117
12.3504	0.132861	0.111677	116		0.136545	0.0909504	117
12.4003	0.13283	0.114444	116		0.139199	0.0910281	117
12.4504	0.130178	0.114424	116		0.13241	0.0894872	117
12.5002	0.127239	0.115192	116		0.135439	0.0992979	117
12.5504	0.126193	0.112103	116		0.126943	0.0897077	117
12.6004	0.124958	0.112144	116		0.127129	0.0891057	117
12.6503	0.126352	0.109354	116		0.129627	0.0898019	117
12.7004	0.123345	0.103429	116		0.122662	0.0880977	117
12.7503	0.126053	0.112453	116		0.118496	0.0900943	117
12.8003	0.126459	0.108316	116		0.122793	0.0820525	117
12.8504	0.119586	0.109053	116		0.125424	0.0835446	117
12.9003	0.118208	0.105634	116		0.117848	0.0854033	117
12.9502	0.107694	0.116092	116		0.116387	0.0876941	117
13.0003	0.113219	0.101769	116		0.118279	0.0854951	117
13.0502	0.119109	0.104153	116		0.116432	0.0818733	117
13.1003	0.11841	0.103297	116		0.113259	0.0836965	117
13.1502	0.117138	0.104328	116		0.111705	0.0795965	117
13.2003	0.116037	0.104495	116		0.116098	0.0852856	117
13.2503	0.111415	0.100254	116		0.109586	0.0845363	117
13.3002	0.109078	0.103266	116		0.111251	0.0792099	117
13.3503	0.111329	0.0964956	116		0.111587	0.0780142	117
13.4004	0.109795	0.0974781	116		0.109104	0.0782496	117
13.4502	0.109936	0.0989231	116		0.109859	0.078647	117
13.5003	0.102225	0.0955762	116		0.10652	0.0842276	117
13.5503	0.103419	0.0946823	116		0.100204	0.0742993	117
13.6005	0.100718	0.097016	116		0.0999229	0.0766749	117
13.6503	0.0957751	0.0912617	116		0.0978567	0.0753122	117
13.7004	0.0999867	0.0933012	116		0.104213	0.0778622	117
13.7503	0.0975358	0.0935852	116		0.0990937	0.0771653	117
13.8004	0.102205	0.0916394	116		0.0974599	0.0717799	117
13.8503	0.0963774	0.0914868	116		0.0908785	0.0750888	117
13.9004	0.0939014	0.0881217	116		0.095521	0.0708913	117
13.9504	0.0952196	0.0872279	116		0.0916654	0.0702659	117
14.0003	0.0930177	0.0901767	116		0.0907609	0.0711425	117
14.0504	0.0910044	0.0856807	116		0.0874376	0.0671027	117
14.1003	0.091334	0.0899448	116		0.093083	0.0701744	117
14.1504	0.0883766	0.0857054	116		0.0865962	0.0681929	117
14.2003	0.0894962	0.085847	116		0.0842329	0.0667531	117
14.2505	0.0880722	0.08246	116		0.0856693	0.0690712	117
14.3002	0.0861262	0.0862318	116		0.0856322	0.0677411	117
14.3503	0.0840935	0.0846027	116		0.0869417	0.06593	117
14.4004	0.0885031	0.0842912	116		0.0829668	0.0678465	117
14.4502	0.0813938	0.0819968	116		0.0835622	0.063682	117
14.5004	0.0824486	0.0833604	116		0.0804559	0.064166	117
14.5503	0.0828773	0.0770513	116		0.084462	0.0619575	117
14.6004	0.0807328	0.0811632	116		0.0787574	0.0622609	117
14.6503	0.0780083	0.0912124	116		0.0822746	0.0620114	117
14.7004	0.0778726	0.0785061	116		0.075712	0.0647042	117
14.7502	0.079369	0.0747424	116		0.0782575	0.0664065	117
14.8004	0.0825851	0.077918	116		0.0753002	0.062195	117
14.8503	0.0746305	0.0749	116		0.0762128	0.0622356	117
14.9003	0.0768611	0.07212	116		0.0744347	0.0597369	117
14.9502	0.0738899	0.073266	116		0.0696119	0.057758	117
15.0002	0.0753333	0.0775561	116		0.0694069	0.0697495	117
15.0503	0.0737465	0.0730659	116		0.0695208	0.0574807	117
15.1004	0.0707448	0.0725665	116		0.0673553	0.0597226	117
15.1502	0.0698989	0.0710125	116		0.0646548	0.0579006	117
15.2004	0.0653325	0.0720923	116		0.0639638	0.0569963	117
15.2502	0.0707662	0.0677996	116		0.0633651	0.0591674	117
15.3003	0.0671939	0.0700697	116		0.0706006	0.055807	117
15.3503	0.0687293	0.0689415	116		0.0610477	0.0528328	117
15.4004	0.0677084	0.0722336	116		0.0608121	0.0558661	117
15.4503	0.0656831	0.066633	116		0.066845	0.0547139	117
15.5005	0.0647419	0.0658692	116		0.0671444	0.058278	117
15.5504	0.0636133	0.0654711	116		0.0631286	0.0516761	117
15.6003	0.0602079	0.0634026	116		0.0648677	0.049601	117
15.6504	0.0622945	0.0604972	116		0.0660497	0.0531065	117
15.7002	0.0623192	0.0621795	116		0.0638698	0.0502485	117
15.7504	0.0574413	0.062591	116		0.0623576	0.049752	117
15.8004	0.0582978	0.0614925	116		0.0597768	0.0494515	117
15.8502	0.0580936	0.0613696	116		0.055151	0.0482275	117
15.9003	0.0582509	0.0618509	116		0.0551473	0.0502096	117
15.9502	0.0597431	0.0592354	116		0.055937	0.0495949	117
16.0002	0.058878	0.0633161	116		0.0528123	0.0508712	117
16.0503	0.0591292	0.0643994	116		0.0580221	0.0488425	117
16.1003	0.0539043	0.0601391	116		0.0484666	0.0506593	117
16.1504	0.0564972	0.0568455	116		0.0502711	0.0484344	117
16.2004	0.055141	0.053408	116		0.0541842	0.0467709	117
16.2503	0.0520297	0.0535005	116		0.0533588	0.0464666	117
16.3004	0.0542911	0.0535183	116		0.0510836	0.0430493	117
16.3504	0.0484543	0.0530992	116		0.0498064	0.0460644	117
16.4003	0.0521473	0.0540499	116		0.0487965	0.0510927	117
16.4504	0.0381033	0.0695912	116		0.050831	0.0435377	117
16.5003	0.0439932	0.0512342	116		0.0481327	0.0410223	117
16.5504	0.0510025	0.0497943	116		0.0467032	0.042657	117
16.6003	0.0471337	0.0507867	116		0.0408713	0.0409779	117
16.6503	0.0444116	0.0488993	116		0.0408166	0.0422392	117
16.7003	0.0499759	0.0508385	116		0.039497	0.0425666	117
16.7502	0.0424588	0.0460576	116		0.0406722	0.0426393	117
16.8003	0.044361	0.0470063	116		0.0394798	0.0414267	117
16.8504	0.0430101	0.0497809	116		0.0465989	0.0371434	117
16.9004	0.0437837	0.0480088	116		0.0361638	0.0406439	117
16.9502	0.0445103	0.0477398	116		0.0399885	0.0396257	117
17.0003	0.0417169	0.0452451	116		0.0409763	0.0410927	117
17.0502	0.04123	0.0449405	116		0.0424692	0.0389759	117
17.1002	0.0450792	0.0481963	116		0.0308724	0.0414426	117
17.1502	0.0411446	0.0476993	116		0.0357526	0.038201	117
17.2004	0.0361793	0.0420001	116		0.0366524	0.036314	117
17.2504	0.0371059	0.0436961	116		0.0326768	0.0387966	117
17.3004	0.0390454	0.0406466	116		0.0367125	0.0387126	117
17.3503	0.0375287	0.0412938	116		0.0360015	0.0352558	117
17.4003	0.0334888	0.0430038	116		0.0334501	0.0348154	117
17.4503	0.0398106	0.0434379	116		0.0354299	0.0380525	117
17.5003	0.0374657	0.041843	116		0.0387232	0.0393489	117
17.5505	0.0315479	0.0396372	116		0.0330662	0.0387244	117
17.6003	0.0355904	0.040234	116		0.0311358	0.0370595	117
17.6503	0.0338849	0.0433676	116		0.0298826	0.0359455	117
17.7004	0.0313216	0.0408719	116		0.034712	0.0353332	117
17.7504	0.0351309	0.0388341	116		0.0351034	0.0343907	117
17.8003	0.0277999	0.0544406	116		0.0290176	0.0342279	117
17.8503	0.0293579	0.0366056	116		0.0306681	0.0359102	117
17.9004	0.0312113	0.040893	116		0.0299449	0.035805	117
17.9503	0.0293619	0.0409832	116		0.0310298	0.0340306	117
18.0004	0.0319979	0.0444021	116		0.0311597	0.0342016	117
18.0504	0.032139	0.0391631	116		0.0276563	0.0321144	117
18.1002	0.0250245	0.0328045	116		0.0275945	0.0319983	117
18.1504	0.0314044	0.0372311	116		0.026921	0.0320278	117
18.2003	0.0297901	0.0356375	116		0.0314753	0.0312206	117
18.2503	0.0265239	0.0380726	116		0.0274954	0.0293642	117
18.3004	0.0247669	0.0392043	116		0.0258256	0.0323067	117
18.3504	0.0263098	0.0371188	116		0.0185282	0.031389	117
18.4002	0.0289063	0.0354187	116		0.0237325	0.0290599	117
18.4504	0.0240462	0.035993	116		0.0244195	0.0306953	117
18.5003	0.0259321	0.0416169	116		0.0242122	0.0312532	117
18.5503	0.0221844	0.0310004	116		0.0216321	0.030087	117
18.6004	0.0202505	0.0343605	116		0.023252	0.0303575	117
18.6503	0.0240462	0.034807	116		0.0224719	0.0312483	117
18.7002	0.0190326	0.0357982	116		0.0258584	0.0275503	117
18.7503	0.0222909	0.038464	116		0.026497	0.0252636	117
18.8002	0.0209801	0.0332274	116		0.018124	0.0304569	117
18.8502	0.0188895	0.0354248	116		0.0216696	0.0259297	117
18.9003	0.0169705	0.0336033	116		0.0168216	0.026216	117
18.9502	0.019286	0.0314577	116		0.0168738	0.0258168	117
19.0003	0.0156971	0.0257661	116		0.0149269	0.0314255	117
19.0504	0.0159253	0.0258967	116		0.0149573	0.0293205	117
19.1002	0.0137488	0.0255315	116		0.0144769	0.0274915	117
19.1502	0.0133854	0.025452	116		0.0123654	0.0258219	117
19.2003	0.0112589	0.0234762	116		0.0166801	0.0261498	117
19.2504	0.0143277	0.0219536	116		0.00892242	0.0235476	117
19.3002	0.0121312	0.023998	116		0.011468	0.0219127	117
19.3504	0.0138845	0.0198805	116		0.0146317	0.0203367	117
19.4003	0.0104784	0.0198819	116		0.0151611	0.0192028	117
19.4504	0.00729166	0.0208363	116		0.0142201	0.0199647	117
19.5003	0.00887743	0.0206896	116		0.00884578	0.0206114	117
19.5503	0.00904365	0.0211636	116		0.0137654	0.0206426	117
19.6003	0.00922068	0.0219273	116		0.0139639	0.0216599	117
19.6503	0.00838671	0.0190251	116		0.0134616	0.0194781	117
19.7003	0.00491284	0.0189155	116		0.00824138	0.0204495	117
19.7503	0.00520228	0.0201806	116		0.0102081	0.0198509	117
19.8004	0.00498791	0.020148	116		0.0125971	0.0199131	117
19.8503	0.00612194	0.0157653	116		0.00605899	0.0190373	117
19.9003	0.0085634	0.0151312	116		0.0117601	0.0194405	117
19.9502	0.00736445	0.0164601	116		0.00746026	0.0194631	117
20.0005	0.00176869	0.018111	116		0.0100055	0.0181637	117
20.0502	0.00163717	0.0158648	116		0.00776305	0.0185881	117
20.1003	0.00526813	0.0181181	116		0.00334799	0.0194755	117
20.1503	0.00265556	0.0147217	116		0.00364039	0.016431	117
20.2004	0.00380972	0.0141386	116		0.00236428	0.0191274	117
20.2504	0.00466631	0.0137694	116		0.00324011	0.018462	117
20.3003	0.000701875	0.0160958	116		0.00783005	0.0177897	117
20.3504	-0.0100621	0.0503521	116		0.00983225	0.018439	117
20.4002	-0.00176478	0.0179775	116		0.00578822	0.0155371	117
20.4505	0.00427963	0.0156841	116		0.000553151	0.0169702	117
20.5002	0.000528345	0.0179519	116		0.00400531	0.014058	117
20.5503	0.00212116	0.0155239	116		-0.000146797	0.0172248	117
20.6002	0.000506509	0.0164228	116		0.00218572	0.0157193	117
20.6502	0.00530243	0.0183219	116		0.00360654	0.015396	117
20.7003	0.00741301	0.0200569	116		0.00196007	0.0159786	117
20.7503	0.00302753	0.0165418	116		0.00743693	0.0154756	117
20.8004	-0.00179754	0.01676	116		-0.000841303	0.0173873	117
20.8502	-0.00502464	0.0187701	116		0.00469192	0.0162274	117
20.9002	0.002024	0.018692	116		-0.00262467	0.0205811	117
20.9503	-0.00163081	0.0203194	116		-0.00436575	0.0171404	117
21.0005	0.00290587	0.0191061	116		-0.00414712	0.0182968	117

## Sheet: Fig.2E
														Basal ratios
	MDA-MB-453 ctrl				MDA-MB-453 + PAX				MDA-MB-453 + IBTX					MDA-MB-453
Time (min)	Average	SD	N (cells)		Average	SD	N (cells)		Average	SD	N (cells)			ctrl	+ PAX	+ IBTX
0	0.210166	0.122651	44		0.343485	0.196649	34		0.338811	0.119129	49			0.218033	0.200548	0.356078
0.0502217	0.211251	0.120012	44		0.34062	0.195271	34		0.336495	0.119457	49			0.0541187	0.155016	0.243539
0.10011	0.215038	0.120109	44		0.33865	0.194094	34		0.333211	0.121776	49			0.246865	0.191944	0.348981
0.1502	0.213643	0.118369	44		0.337333	0.192632	34		0.330626	0.121918	49			0.151147	0.0591081	0.432558
0.200187	0.21487	0.118176	44		0.337342	0.190891	34		0.325114	0.116794	49			0.155868	0.858166	0.231371
0.250018	0.214401	0.118998	44		0.340252	0.19323	34		0.339374	0.118566	49			0.141068	0.228469	0.24388
0.300262	0.212726	0.118619	44		0.336707	0.191491	34		0.330174	0.123064	49			0.271397	0.128559	0.30374
0.350085	0.211086	0.116367	44		0.338752	0.19306	34		0.333145	0.120658	49			0.250772	0.163177	0.353329
0.40011	0.213643	0.118257	44		0.336128	0.193905	34		0.337116	0.117401	49			-0.0192309	0.133528	0.343821
0.450098	0.210768	0.119011	44		0.340434	0.193694	34		0.341787	0.120287	49			0.155763	0.297868	0.320059
0.500117	0.21354	0.117376	44		0.339089	0.191524	34		0.333438	0.11968	49			0.352784	0.149681	0.358319
0.550103	0.21338	0.119114	44		0.327028	0.205862	34		0.333675	0.122092	49			0.189142	0.200422	0.21784
0.600187	0.212192	0.117469	44		0.337779	0.19004	34		0.331144	0.119228	49			0.204125	0.319618	0.110844
0.650062	0.210807	0.117481	44		0.339829	0.191086	34		0.335575	0.121302	49			0.0640242	0.391042	0.491567
0.700195	0.213179	0.116482	44		0.337771	0.19122	34		0.337135	0.119975	49			0.180606	0.238748	0.206183
0.750182	0.214181	0.118514	44		0.33784	0.193128	34		0.33114	0.122912	49			0.128642	0.430934	0.0568857
0.80003	0.215101	0.118153	44		0.341806	0.188859	34		0.331255	0.121741	49			0.0555732	0.341536	0.0851021
0.850143	0.214668	0.117177	44		0.340342	0.190679	34		0.332708	0.11628	49			0.181752	0.345867	0.329191
0.900163	0.21061	0.116542	44		0.339979	0.194146	34		0.3341	0.118891	49			0.464909	0.300405	0.459061
0.950098	0.215367	0.11593	44		0.336762	0.192405	34		0.329959	0.120596	49			0.217575	0.287385	0.412573
1.00008	0.215161	0.115787	44		0.34018	0.191621	34		0.342982	0.123176	49			-0.0605447	0.162754	0.457957
1.05024	0.215395	0.118801	44		0.340198	0.190407	34		0.334582	0.116766	49			0.00655895	0.355909	0.410093
1.10021	0.213906	0.11887	44		0.340789	0.191636	34		0.336066	0.117633	49			0.306719	0.315594	0.439431
1.15018	0.212603	0.116461	44		0.339417	0.192077	34		0.340891	0.116277	49			0.301665	0.323445	0.290611
1.20005	0.212388	0.117096	44		0.341403	0.189743	34		0.332861	0.117278	49			0.143039	0.0891478	0.371428
1.25024	0.210897	0.116907	44		0.338821	0.187184	34		0.333121	0.12356	49			0.305661	0.280038	0.379589
1.30024	0.211774	0.117001	44		0.33997	0.189542	34		0.334311	0.116038	49			0.0876167	0.572312	0.307257
1.35025	0.212083	0.119558	44		0.338488	0.19026	34		0.345478	0.11656	49			0.170067	0.650449	0.360765
1.40047	0.214714	0.118572	44		0.33835	0.189178	34		0.335342	0.119615	49			0.298728	0.743227	0.452735
1.45026	0.214726	0.11911	44		0.33896	0.191411	34		0.335189	0.120901	49			0.322996	0.676691	0.530462
1.5001	0.213472	0.118333	44		0.337683	0.1901	34		0.33272	0.119927	49			0.13004	0.478219	0.575112
1.55002	0.213134	0.117979	44		0.335223	0.186095	34		0.327421	0.116152	49			0.310538	0.4725	0.239018
1.60022	0.213708	0.116691	44		0.338911	0.189387	34		0.330082	0.120336	49			0.241966	0.457159	0.217103
1.65014	0.211815	0.118834	44		0.339594	0.191687	34		0.334289	0.115647	49			0.0954072	0.482597	0.236084
1.70021	0.210276	0.116986	44		0.338644	0.189706	34		0.334401	0.118849	49			0.280548		0.214823
1.75032	0.214146	0.118257	44		0.339854	0.188844	34		0.333423	0.118643	49			0.224735		0.27806
1.80012	0.215739	0.120656	44		0.339017	0.189904	34		0.334692	0.117395	49			0.32115		0.216254
1.85015	0.214038	0.11814	44		0.33517	0.190543	34		0.344409	0.121965	49			0.226051		0.457338
1.90008	0.213023	0.118045	44		0.335516	0.185473	34		0.337567	0.119818	49			0.168475		0.375307
1.95011	0.214607	0.118791	44		0.33875	0.191169	34		0.334474	0.119635	49			0.255105		0.544611
2.00023	0.212845	0.117546	44		0.3386	0.187975	34		0.338463	0.121419	49			0.355612		0.430318
2.05019	0.213418	0.119728	44		0.34129	0.191231	34		0.346461	0.119737	49			0.427502		0.495308
2.10022	0.213679	0.118259	44		0.335127	0.190433	34		0.327808	0.115995	49			0.419161		0.264172
2.15003	0.210619	0.118213	44		0.335388	0.188955	34		0.336297	0.117848	49			0.375917		0.281482
2.20005	0.2158	0.11807	44		0.338995	0.189522	34		0.335887	0.125781	49					0.0843662
2.25019	0.215403	0.117804	44		0.335122	0.189385	34		0.334594	0.119718	49					0.137337
2.30018	0.213905	0.117751	44		0.337207	0.189687	34		0.326695	0.119084	49					0.475892
2.35024	0.214214	0.117199	44		0.337277	0.189329	34		0.337572	0.120419	49					0.335437
2.40002	0.215876	0.118321	44		0.335936	0.192381	34		0.336949	0.116559	49					0.357305
2.45019	0.213243	0.119108	44		0.338207	0.186417	34		0.321427	0.121903	49
2.50026	0.213513	0.12037	44		0.337241	0.190102	34		0.331722	0.117794	49
2.5501	0.216525	0.118434	44		0.335252	0.189779	34		0.332234	0.117492	49
2.60019	0.214949	0.116993	44		0.334924	0.190803	34		0.334091	0.116754	49
2.65023	0.213309	0.118173	44		0.335089	0.186235	34		0.33424	0.123914	49
2.70021	0.208952	0.117286	44		0.335722	0.189152	34		0.339249	0.119269	49
2.75032	0.211018	0.11837	44		0.335599	0.188409	34		0.341133	0.12142	49
2.80007	0.211187	0.117559	44		0.335526	0.186498	34		0.33655	0.120154	49
2.85012	0.210269	0.117229	44		0.33331	0.191448	34		0.334819	0.118315	49
2.90014	0.210657	0.117337	44		0.335482	0.186689	34		0.338489	0.120872	49
2.9501	0.211144	0.116016	44		0.334334	0.190721	34		0.334273	0.122899	49
3.00023	0.213048	0.118338	44		0.332684	0.188658	34		0.33223	0.119852	49
3.05011	0.21498	0.120087	44		0.336536	0.190058	34		0.329667	0.119854	49
3.10005	0.215102	0.118075	44		0.332354	0.188079	34		0.330044	0.119397	49
3.15006	0.211841	0.118136	44		0.332748	0.187429	34		0.332445	0.121241	49
3.20012	0.211037	0.117648	44		0.331772	0.1851	34		0.335007	0.117152	49
3.25018	0.209453	0.116515	44		0.335441	0.187592	34		0.326782	0.120069	49
3.30024	0.214761	0.120187	44		0.333906	0.190326	34		0.341435	0.11746	49
3.35005	0.211573	0.117618	44		0.332707	0.187859	34		0.332845	0.120777	49
3.40022	0.21266	0.117572	44		0.333491	0.187732	34		0.333889	0.118394	49
3.45034	0.213586	0.116146	44		0.333592	0.187904	34		0.332541	0.120256	49
3.50011	0.212383	0.117445	44		0.332832	0.190266	34		0.334475	0.121199	49
3.55016	0.210598	0.118147	44		0.335154	0.187794	34		0.33065	0.121259	49
3.60019	0.212386	0.118088	44		0.332965	0.187097	34		0.337407	0.121306	49
3.65009	0.212348	0.116164	44		0.33349	0.18665	34		0.331155	0.119602	49
3.70005	0.213711	0.118564	44		0.331204	0.185347	34		0.334913	0.118393	49
3.75002	0.214061	0.118164	44		0.331209	0.184816	34		0.336939	0.119326	49
3.80022	0.213903	0.116872	44		0.330229	0.188814	34		0.333143	0.122845	49
3.85039	0.212214	0.115426	44		0.329814	0.18623	34		0.335756	0.120605	49
3.90006	0.213127	0.116332	44		0.33049	0.184457	34		0.335856	0.119528	49
3.95018	0.210929	0.116116	44		0.330936	0.184451	34		0.331576	0.121318	49
4.00021	0.211629	0.116257	44		0.331451	0.18635	34		0.335022	0.120343	49
4.05026	0.213569	0.117401	44		0.329674	0.183415	34		0.339349	0.118595	49
4.10001	0.211028	0.118176	44		0.334271	0.185767	34		0.33363	0.121266	49
4.15004	0.209719	0.116913	44		0.328076	0.184395	34		0.334133	0.120085	49
4.2	0.211703	0.117192	44		0.331791	0.185679	34		0.335889	0.121616	49
4.25016	0.210043	0.117629	44		0.329079	0.184306	34		0.337715	0.117548	49
4.30009	0.209259	0.116806	44		0.328238	0.181739	34		0.324512	0.118265	49
4.35023	0.208629	0.115821	44		0.333293	0.182576	34		0.335493	0.119039	49
4.40029	0.2112	0.118092	44		0.331264	0.179978	34		0.330018	0.120377	49
4.45003	0.210613	0.117104	44		0.332037	0.185064	34		0.342936	0.1194	49
4.50002	0.208486	0.117526	44		0.327573	0.181981	34		0.324482	0.121165	49
4.55006	0.20861	0.116472	44		0.328043	0.18471	34		0.3279	0.117963	49
4.60015	0.210263	0.116893	44		0.329779	0.181564	34		0.333244	0.119596	49
4.65017	0.207976	0.116249	44		0.326193	0.181257	34		0.336092	0.124053	49
4.70017	0.208633	0.116818	44		0.330161	0.180296	34		0.330443	0.117916	49
4.75017	0.209467	0.117727	44		0.331294	0.182232	34		0.331474	0.119437	49
4.8001	0.207114	0.115402	44		0.329423	0.180238	34		0.328504	0.116214	49
4.85007	0.206496	0.116813	44		0.326102	0.180586	34		0.332615	0.119832	49
4.90021	0.207555	0.115639	44		0.327641	0.178538	34		0.33475	0.118893	49
4.95018	0.206648	0.114263	44		0.327182	0.181238	34		0.336741	0.12042	49
5.00007	0.207964	0.115586	44		0.327638	0.183362	34		0.32734	0.121099	49
5.05009	0.208396	0.118042	44		0.32832	0.177949	34		0.323956	0.118377	49
5.10025	0.205952	0.115038	44		0.32665	0.179492	34		0.329862	0.116639	49
5.15002	0.205075	0.115604	44		0.324335	0.178109	34		0.331526	0.12007	49
5.20006	0.206707	0.116603	44		0.327223	0.180329	34		0.340146	0.117063	49
5.25025	0.205636	0.112743	44		0.323979	0.17762	34		0.33774	0.119004	49
5.30017	0.205038	0.11492	44		0.326085	0.178447	34		0.333049	0.115554	49
5.35006	0.205392	0.114018	44		0.32482	0.176964	34		0.326136	0.118274	49
5.40027	0.20296	0.114034	44		0.324308	0.178823	34		0.333653	0.121846	49
5.45013	0.204119	0.115049	44		0.324126	0.179558	34		0.332406	0.119647	49
5.50011	0.204173	0.114193	44		0.32527	0.179797	34		0.333918	0.120003	49
5.55009	0.206744	0.115253	44		0.324564	0.178939	34		0.330383	0.117541	49
5.60018	0.205312	0.114588	44		0.324258	0.179236	34		0.323986	0.117712	49
5.65017	0.204739	0.1166	44		0.321825	0.174345	34		0.330481	0.116844	49
5.70025	0.202191	0.110864	44		0.321857	0.173775	34		0.326852	0.1197	49
5.75002	0.205281	0.115288	44		0.32433	0.175246	34		0.323024	0.123084	49
5.80008	0.204174	0.115716	44		0.323021	0.175838	34		0.323721	0.116043	49
5.85001	0.204667	0.115073	44		0.323089	0.179368	34		0.331759	0.118175	49
5.9001	0.204717	0.115716	44		0.323679	0.174723	34		0.328054	0.114796	49
5.95015	0.202459	0.113665	44		0.324397	0.174981	34		0.322124	0.116854	49
6.00019	0.202027	0.112992	44		0.322623	0.175444	34		0.329697	0.119215	49
6.05012	0.20124	0.113035	44		0.321366	0.176549	34		0.333922	0.119651	49
6.10009	0.204594	0.115338	44		0.322351	0.17192	34		0.327547	0.115865	49
6.15008	0.20148	0.116323	44		0.321657	0.174421	34		0.330242	0.11701	49
6.20017	0.202241	0.116041	44		0.322941	0.175241	34		0.325176	0.117457	49
6.25004	0.203595	0.112507	44		0.323708	0.17437	34		0.326749	0.118128	49
6.30015	0.201449	0.112802	44		0.317322	0.172291	34		0.323031	0.118005	49
6.3502	0.204278	0.114079	44		0.320169	0.171481	34		0.321114	0.11745	49
6.40011	0.204539	0.114409	44		0.319412	0.174023	34		0.324287	0.116992	49
6.45026	0.204511	0.114479	44		0.320606	0.172732	34		0.32789	0.113352	49
6.50008	0.201379	0.113071	44		0.322229	0.174721	34		0.328238	0.114519	49
6.55008	0.201703	0.112808	44		0.314972	0.166975	34		0.320503	0.114534	49
6.60023	0.202746	0.115515	44		0.322106	0.172104	34		0.31869	0.119543	49
6.65021	0.200613	0.111848	44		0.318976	0.172814	34		0.322102	0.116758	49
6.70001	0.200413	0.113045	44		0.319958	0.17173	34		0.318937	0.114987	49
6.7501	0.200939	0.11421	44		0.316918	0.170023	34		0.321799	0.123555	49
6.80009	0.198177	0.112275	44		0.315912	0.171736	34		0.320564	0.118659	49
6.85022	0.20409	0.114964	44		0.317846	0.171859	34		0.316831	0.117822	49
6.90003	0.200135	0.114056	44		0.317168	0.169653	34		0.324555	0.116662	49
6.95018	0.200059	0.113399	44		0.317982	0.17093	34		0.321827	0.120827	49
7.00001	0.199733	0.11147	44		0.319928	0.172327	34		0.31449	0.117691	49
7.05002	0.203121	0.116129	44		0.319889	0.170598	34		0.314876	0.117899	49
7.10019	0.198591	0.110899	44		0.317491	0.17304	34		0.321884	0.116412	49
7.15008	0.200719	0.111824	44		0.320087	0.168211	34		0.321861	0.116284	49
7.20001	0.200518	0.112561	44		0.316803	0.167065	34		0.314224	0.117163	49
7.25012	0.198199	0.110969	44		0.315699	0.16804	34		0.321237	0.115326	49
7.30024	0.200541	0.114846	44		0.318697	0.169889	34		0.320941	0.115446	49
7.35018	0.197613	0.110806	44		0.315481	0.169145	34		0.318034	0.11388	49
7.40006	0.199108	0.111734	44		0.317354	0.1697	34		0.31987	0.121435	49
7.45007	0.19962	0.11044	44		0.314641	0.167624	34		0.315006	0.12041	49
7.50003	0.199662	0.112595	44		0.314472	0.168137	34		0.315588	0.117076	49
7.55008	0.199445	0.113071	44		0.317273	0.16913	34		0.31921	0.112441	49
7.60016	0.198278	0.112025	44		0.31626	0.16625	34		0.317683	0.115673	49
7.65015	0.198998	0.110169	44		0.313876	0.167149	34		0.319801	0.114669	49
7.70024	0.199753	0.112079	44		0.31621	0.167745	34		0.317626	0.117927	49
7.75007	0.197579	0.112557	44		0.318493	0.164837	34		0.314508	0.115316	49
7.80005	0.196967	0.111622	44		0.31423	0.166731	34		0.310663	0.117364	49
7.85014	0.197868	0.111342	44		0.312855	0.165257	34		0.319772	0.114807	49
7.90013	0.196249	0.110351	44		0.31265	0.162222	34		0.312286	0.115009	49
7.95021	0.199613	0.110967	44		0.313863	0.161808	34		0.317207	0.11537	49
8.00004	0.196578	0.111189	44		0.315488	0.168532	34		0.313578	0.118494	49
8.05003	0.197138	0.111666	44		0.312083	0.16352	34		0.310967	0.116903	49
8.10011	0.197336	0.111661	44		0.31272	0.163871	34		0.318856	0.122252	49
8.1501	0.197735	0.109926	44		0.315353	0.163684	34		0.320657	0.119149	49
8.20018	0.195841	0.111142	44		0.312872	0.164943	34		0.31078	0.118726	49
8.25001	0.199655	0.110476	44		0.315147	0.165095	34		0.314067	0.119506	49
8.30026	0.197379	0.110729	44		0.313551	0.161974	34		0.316675	0.115664	49
8.35008	0.198202	0.110413	44		0.315125	0.16527	34		0.319166	0.113928	49
8.40007	0.198782	0.109781	44		0.312173	0.16486	34		0.311785	0.123048	49
8.45015	0.197195	0.109814	44		0.313224	0.16384	34		0.316836	0.114745	49
8.50024	0.196538	0.108361	44		0.314684	0.161756	34		0.318341	0.120578	49
8.55022	0.198232	0.111009	44		0.315588	0.161666	34		0.312974	0.115616	49
8.60007	0.199142	0.110544	44		0.310262	0.159144	34		0.311339	0.115769	49
8.65006	0.198622	0.109334	44		0.311722	0.161573	34		0.308219	0.117048	49
8.70014	0.19608	0.10965	44		0.312964	0.157498	34		0.310259	0.118118	49
8.75023	0.195623	0.109843	44		0.311156	0.155607	34		0.306353	0.116365	49
8.80022	0.195367	0.110362	44		0.30971	0.160878	34		0.317307	0.114462	49
8.85004	0.19759	0.112653	44		0.310552	0.161262	34		0.309508	0.117079	49
8.90003	0.194945	0.10958	44		0.310799	0.156971	34		0.306693	0.114652	49
8.95011	0.192639	0.108234	44		0.30935	0.158029	34		0.306258	0.117021	49
9.0002	0.193699	0.108514	44		0.309827	0.159258	34		0.310244	0.113869	49
9.05019	0.196985	0.109973	44		0.314946	0.160525	34		0.312902	0.11566	49
9.10001	0.192231	0.109279	44		0.310293	0.157289	34		0.311096	0.116238	49
9.15026	0.192164	0.108397	44		0.307953	0.155334	34		0.30795	0.112774	49
9.20008	0.1912	0.106174	44		0.306247	0.153577	34		0.30917	0.119523	49
9.25017	0.194041	0.108432	44		0.306774	0.157308	34		0.305401	0.117447	49
9.30016	0.192628	0.106638	44		0.30969	0.156123	34		0.301689	0.116464	49
9.35024	0.19066	0.105922	44		0.310514	0.158473	34		0.299456	0.11565	49
9.40023	0.190924	0.105551	44		0.306243	0.153703	34		0.300778	0.11293	49
9.45006	0.192881	0.106733	44		0.307603	0.157005	34		0.306975	0.115366	49
9.50016	0.189795	0.104117	44		0.306391	0.155582	34		0.303897	0.120019	49
9.55015	0.191306	0.105165	44		0.305462	0.152581	34		0.303535	0.112748	49
9.60023	0.187898	0.106551	44		0.303222	0.149844	34		0.296714	0.115957	49
9.65022	0.189652	0.105573	44		0.306248	0.150763	34		0.297664	0.115977	49
9.70005	0.190773	0.107124	44		0.303549	0.151161	34		0.297041	0.117077	49
9.75019	0.185773	0.103445	44		0.30157	0.146772	34		0.291236	0.112054	49
9.80018	0.185952	0.105128	44		0.30457	0.150699	34		0.291276	0.116211	49
9.85002	0.184343	0.103408	44		0.297364	0.146534	34		0.29493	0.111578	49
9.9	0.186157	0.104059	44		0.301382	0.146382	34		0.297932	0.110408	49
9.95009	0.183145	0.103786	44		0.298703	0.149864	34		0.289857	0.114497	49
10.0002	0.183695	0.103548	44		0.297047	0.145937	34		0.299393	0.113109	49
10.0502	0.184707	0.103462	44		0.298842	0.146337	34		0.287404	0.111579	49
10.1002	0.183957	0.104378	44		0.299121	0.148199	34		0.285415	0.116007	49
10.1502	0.184652	0.103976	44		0.296783	0.143652	34		0.28751	0.114312	49
10.2001	0.180899	0.101919	44		0.29341	0.142899	34		0.283783	0.115181	49
10.2502	0.182272	0.102436	44		0.296174	0.142886	34		0.293178	0.112992	49
10.3001	0.180726	0.101611	44		0.295269	0.144223	34		0.286335	0.112705	49
10.3502	0.181042	0.101524	44		0.292239	0.14269	34		0.279342	0.110405	49
10.4002	0.178676	0.100992	44		0.291775	0.139946	34		0.285787	0.113351	49
10.45	0.180159	0.101701	44		0.289419	0.141795	34		0.279857	0.115916	49
10.5001	0.178766	0.101023	44		0.290872	0.14236	34		0.281101	0.112592	49
10.5501	0.175922	0.101207	44		0.287922	0.140262	34		0.286989	0.114646	49
10.6002	0.178256	0.100205	44		0.287554	0.140555	34		0.272003	0.11244	49
10.6502	0.175378	0.102188	44		0.292351	0.139894	34		0.276016	0.111311	49
10.7	0.175239	0.100656	44		0.286983	0.136377	34		0.274014	0.111643	49
10.7501	0.174982	0.100049	44		0.285286	0.135953	34		0.270271	0.114845	49
10.8001	0.175441	0.0985177	44		0.285918	0.137966	34		0.276035	0.108775	49
10.85	0.172854	0.100974	44		0.288192	0.137917	34		0.271451	0.115549	49
10.9	0.174792	0.0988676	44		0.283286	0.134326	34		0.272506	0.113021	49
10.9501	0.173866	0.099373	44		0.285841	0.13569	34		0.270422	0.113974	49
11.0002	0.173736	0.0980465	44		0.284338	0.13616	34		0.266324	0.116285	49
11.0502	0.172581	0.0985525	44		0.282361	0.131653	34		0.269331	0.111612	49
11.1	0.171073	0.0972574	44		0.281149	0.131558	34		0.263204	0.108944	49
11.1503	0.169871	0.0979651	44		0.279687	0.132769	34		0.260514	0.110908	49
11.2001	0.171547	0.0961688	44		0.28047	0.132952	34		0.264255	0.114999	49
11.2502	0.171108	0.0982741	44		0.281287	0.130672	34		0.256967	0.111553	49
11.3002	0.170121	0.0976104	44		0.279266	0.128289	34		0.261508	0.115501	49
11.3502	0.171324	0.0970484	44		0.275433	0.129065	34		0.247549	0.117491	49
11.4002	0.169621	0.0972789	44		0.274809	0.127189	34		0.254638	0.114008	49
11.4501	0.167366	0.0960168	44		0.276444	0.132688	34		0.259209	0.114129	49
11.5001	0.166111	0.0945202	44		0.273135	0.126187	34		0.253682	0.116527	49
11.5501	0.16541	0.0957712	44		0.274932	0.128274	34		0.258487	0.111506	49
11.6002	0.163143	0.0952139	44		0.272843	0.12559	34		0.247135	0.113166	49
11.6502	0.16576	0.0966769	44		0.271866	0.127197	34		0.251858	0.112208	49
11.7	0.162623	0.0943717	44		0.267942	0.122713	34		0.248975	0.116262	49
11.7501	0.163281	0.0955697	44		0.272145	0.127291	34		0.249791	0.114483	49
11.8001	0.164087	0.0941692	44		0.266983	0.123116	34		0.241014	0.109238	49
11.8502	0.16267	0.0941359	44		0.265997	0.122723	34		0.239076	0.115883	49
11.9002	0.161321	0.0935142	44		0.265476	0.119731	34		0.237938	0.114826	49
11.9503	0.1622	0.0950751	44		0.266911	0.121215	34		0.23455	0.11041	49
12.0001	0.163121	0.0955857	44		0.262575	0.117522	34		0.233339	0.112314	49
12.0501	0.161218	0.0947042	44		0.262965	0.118829	34		0.236626	0.112891	49
12.1002	0.160233	0.0941523	44		0.264697	0.119006	34		0.238279	0.112581	49
12.1501	0.157009	0.0938576	44		0.263603	0.122894	34		0.236812	0.111789	49
12.2002	0.156594	0.0923381	44		0.258973	0.115363	34		0.22989	0.114496	49
12.2501	0.157156	0.0936665	44		0.260325	0.116074	34		0.233288	0.112968	49
12.3	0.156248	0.0939254	44		0.258254	0.117001	34		0.233525	0.113657	49
12.3501	0.156111	0.0907566	44		0.259188	0.113259	34		0.231467	0.111144	49
12.4001	0.155166	0.0922707	44		0.255573	0.113746	34		0.224529	0.111027	49
12.4502	0.155069	0.0919834	44		0.257305	0.115828	34		0.223771	0.11317	49
12.5	0.155061	0.0918541	44		0.253395	0.116205	34		0.226099	0.112424	49
12.55	0.156453	0.0917875	44		0.254848	0.115051	34		0.231558	0.110625	49
12.6001	0.154208	0.0919167	44		0.250503	0.111862	34		0.218611	0.112802	49
12.6501	0.154577	0.0911541	44		0.254861	0.112731	34		0.216012	0.109582	49
12.7002	0.151153	0.0907294	44		0.249895	0.113588	34		0.217218	0.108021	49
12.7503	0.15247	0.0923166	44		0.250198	0.11036	34		0.219016	0.112004	49
12.8002	0.150653	0.0911431	44		0.248647	0.112921	34		0.215792	0.10858	49
12.8501	0.148051	0.089142	44		0.247028	0.110265	34		0.205277	0.110844	49
12.9001	0.149566	0.0885365	44		0.250298	0.110638	34		0.203925	0.112046	49
12.9501	0.145434	0.0889467	44		0.245027	0.111504	34		0.207288	0.10967	49
13.0002	0.148378	0.0888962	44		0.24612	0.108604	34		0.215318	0.111181	49
13.0502	0.148381	0.089826	44		0.244481	0.106875	34		0.205819	0.110032	49
13.1	0.147298	0.0889972	44		0.245227	0.107666	34		0.205543	0.105992	49
13.15	0.145644	0.0876809	44		0.243477	0.107502	34		0.206785	0.106038	49
13.2001	0.148126	0.0879233	44		0.241026	0.108823	34		0.21082	0.110039	49
13.2502	0.144854	0.0882577	44		0.238257	0.105773	34		0.20835	0.109927	49
13.3002	0.145216	0.087069	44		0.240159	0.10693	34		0.209633	0.109024	49
13.35	0.144039	0.0870808	44		0.239347	0.108105	34		0.204945	0.109568	49
13.4003	0.143885	0.086525	44		0.239434	0.106094	34		0.199001	0.109505	49
13.4501	0.142172	0.0871054	44		0.233742	0.106069	34		0.200888	0.107404	49
13.5002	0.143111	0.0883554	44		0.235462	0.104668	34		0.200837	0.105141	49
13.5502	0.143223	0.0855848	44		0.235337	0.103256	34		0.195176	0.106308	49
13.6002	0.142328	0.085766	44		0.233913	0.106015	34		0.200616	0.106921	49
13.6502	0.140263	0.0865304	44		0.234768	0.103518	34		0.195053	0.107934	49
13.7	0.140284	0.0864658	44		0.231896	0.101413	34		0.1894	0.10512	49
13.7501	0.139802	0.0866529	44		0.22908	0.104027	34		0.194899	0.10497	49
13.8001	0.138562	0.0843368	44		0.230832	0.100735	34		0.196095	0.105345	49
13.8502	0.138355	0.0853114	44		0.226061	0.101329	34		0.190221	0.106192	49
13.9002	0.138458	0.085293	44		0.230963	0.10254	34		0.186336	0.105743	49
13.95	0.139772	0.0850237	44		0.225359	0.098975	34		0.183921	0.106822	49
14.0001	0.137265	0.0847204	44		0.226549	0.103417	34		0.18212	0.104637	49
14.0501	0.136043	0.0852177	44		0.224912	0.0990199	34		0.178971	0.0993052	49
14.1002	0.138811	0.0845425	44		0.223158	0.0971527	34		0.179215	0.101394	49
14.1502	0.136222	0.0845121	44		0.223254	0.100901	34		0.175001	0.102761	49
14.2003	0.134261	0.0842649	44		0.219745	0.0967234	34		0.180531	0.102785	49
14.2501	0.136032	0.0836416	44		0.223926	0.100393	34		0.174748	0.10413	49
14.3001	0.133759	0.0843191	44		0.219842	0.0972473	34		0.169638	0.100764	49
14.3501	0.134064	0.0823598	44		0.220024	0.0969811	34		0.171326	0.102644	49
14.4001	0.134787	0.0839687	44		0.220131	0.0961675	34		0.175184	0.0990551	49
14.4502	0.132444	0.0824324	44		0.219013	0.0980697	34		0.175344	0.101853	49
14.5	0.131253	0.0833835	44		0.218491	0.0968596	34		0.171954	0.0997084	49
14.55	0.133917	0.0839992	44		0.215387	0.0943036	34		0.166067	0.103139	49
14.6001	0.131428	0.0826059	44		0.219536	0.0967697	34		0.169536	0.104762	49
14.6501	0.131319	0.0837239	44		0.214461	0.0959523	34		0.162447	0.0990171	49
14.7002	0.13066	0.0833568	44		0.217457	0.097755	34		0.165543	0.0965439	49
14.75	0.130785	0.0833371	44		0.214344	0.094972	34		0.160549	0.0997107	49
14.8	0.129223	0.0814737	44		0.212416	0.095583	34		0.163153	0.0974285	49
14.8501	0.129289	0.0816501	44		0.209797	0.0924143	34		0.159272	0.098029	49
14.9001	0.129637	0.0840647	44		0.209508	0.0917708	34		0.157073	0.097776	49
14.9502	0.12745	0.0805548	44		0.21041	0.093624	34		0.159786	0.0966686	49
15.0003	0.126089	0.0819448	44		0.20737	0.0935312	34		0.157548	0.0986818	49
15.0502	0.126086	0.082189	44		0.208892	0.0911112	34		0.15445	0.0986935	49
15.1001	0.123391	0.080784	44		0.205424	0.0953412	34		0.160233	0.0962787	49
15.1501	0.126234	0.0813118	44		0.207011	0.0890478	34		0.156386	0.0964498	49
15.2001	0.123127	0.0806703	44		0.205853	0.0927903	34		0.156849	0.0970294	49
15.2502	0.125645	0.0807308	44		0.207482	0.0930096	34		0.145541	0.0944555	49
15.3002	0.125258	0.0804059	44		0.20616	0.090481	34		0.145229	0.096468	49
15.35	0.122433	0.0790135	44		0.203741	0.0894597	34		0.15148	0.0971666	49
15.4	0.120198	0.0816796	44		0.20331	0.0900097	34		0.144736	0.0959325	49
15.4501	0.121523	0.0784835	44		0.202847	0.0891623	34		0.14704	0.0966318	49
15.5002	0.120689	0.0810972	44		0.201431	0.0927894	34		0.141982	0.093678	49
15.5502	0.121547	0.0794789	44		0.201918	0.0899533	34		0.141942	0.0929694	49
15.6	0.120431	0.0800832	44		0.199502	0.0892954	34		0.140094	0.09127	49
15.6503	0.119051	0.0793943	44		0.201218	0.0887833	34		0.144179	0.0923704	49
15.7001	0.118135	0.0810632	44		0.198014	0.0871122	34		0.143592	0.0925631	49
15.7502	0.119021	0.0774943	44		0.198439	0.0890506	34		0.143089	0.0898052	49
15.8002	0.119575	0.079964	44		0.198355	0.0904581	34		0.14109	0.0924374	49
15.8501	0.116295	0.0801567	44		0.194971	0.089676	34		0.131678	0.0916006	49
15.9001	0.117515	0.0804196	44		0.196761	0.0869327	34		0.138266	0.0922044	49
15.9501	0.115455	0.0783861	44		0.194942	0.0876966	34		0.142592	0.0901458	49
16.0002	0.116752	0.0782313	44		0.194344	0.0872087	34		0.131096	0.08998	49
16.0502	0.114004	0.0775635	44		0.193169	0.0896122	34		0.134877	0.0901779	49
16.1	0.11472	0.0767857	44		0.193203	0.0860915	34		0.134669	0.0898292	49
16.15	0.111021	0.0782724	44		0.190522	0.0863585	34		0.131879	0.0891933	49
16.2001	0.113143	0.0769201	44		0.192462	0.0877014	34		0.131644	0.0869752	49
16.2502	0.114197	0.07797	44		0.192172	0.0853164	34		0.131862	0.0877006	49
16.3002	0.111906	0.078243	44		0.188982	0.0853295	34		0.129084	0.0868477	49
16.35	0.112898	0.0770009	44		0.191192	0.0875519	34		0.126374	0.0905653	49
16.4	0.113027	0.0777486	44		0.185432	0.0838709	34		0.126127	0.0893335	49
16.4501	0.109436	0.0776285	44		0.187022	0.0864648	34		0.11987	0.0894171	49
16.5002	0.111505	0.0766225	44		0.187214	0.0869574	34		0.117685	0.088626	49
16.5502	0.111152	0.0760385	44		0.187228	0.0860884	34		0.120288	0.086695	49
16.6	0.109652	0.0764937	44		0.185264	0.0857988	34		0.116347	0.0868505	49
16.6503	0.108871	0.0769672	44		0.185881	0.0880677	34		0.121737	0.0853574	49
16.7001	0.109212	0.0762221	44		0.182026	0.0846799	34		0.118445	0.0866643	49
16.7502	0.107288	0.0750724	44		0.182386	0.0841144	34		0.114151	0.0858118	49
16.8002	0.107308	0.0754692	44		0.18375	0.0855273	34		0.118005	0.0879893	49
16.8502	0.105857	0.0751772	44		0.184677	0.086435	34		0.114736	0.087093	49
16.9002	0.106413	0.076272	44		0.183185	0.0849221	34		0.117826	0.0850698	49
16.9501	0.106221	0.0741202	44		0.180074	0.0843045	34		0.117343	0.0847001	49
17.0001	0.10735	0.0750619	44		0.180729	0.0833221	34		0.114356	0.0865698	49
17.0501	0.104108	0.0744605	44		0.179124	0.0836688	34		0.118005	0.0841545	49
17.1002	0.104855	0.0744267	44		0.178481	0.0843264	34		0.112732	0.0862966	49
17.1502	0.104472	0.0748464	44		0.179603	0.0846381	34		0.109674	0.083924	49
17.2	0.104933	0.0749801	44		0.175878	0.082333	34		0.113726	0.0855566	49
17.2501	0.10272	0.0744302	44		0.175918	0.0841812	34		0.108561	0.0860783	49
17.3001	0.105113	0.0755918	44		0.176081	0.0832718	34		0.116156	0.0843635	49
17.3502	0.104598	0.0730485	44		0.176323	0.0834222	34		0.10731	0.0835479	49
17.4002	0.103779	0.0753057	44		0.174389	0.0825324	34		0.110477	0.0829164	49
17.4503	0.102948	0.0738653	44		0.173326	0.0831432	34		0.106095	0.0839765	49
17.5001	0.101	0.0751003	44		0.174804	0.0850707	34		0.10201	0.0834701	49
17.5501	0.101969	0.0738406	44		0.170867	0.0832689	34		0.102666	0.082013	49
17.6002	0.098693	0.0744885	44		0.172751	0.08166	34		0.106324	0.0803855	49
17.6502	0.101374	0.0740277	44		0.173425	0.0828138	34		0.0953848	0.0838335	49
17.7003	0.100734	0.0745959	44		0.170003	0.081192	34		0.103339	0.0793184	49
17.7501	0.0997375	0.0725075	44		0.170946	0.0808732	34		0.100108	0.0788921	49
17.8001	0.101675	0.0740403	44		0.171809	0.0847425	34		0.104819	0.0762564	49
17.8502	0.0998762	0.0727682	44		0.168554	0.081935	34		0.100895	0.0801391	49
17.9002	0.0992296	0.0727637	44		0.171317	0.0824353	34		0.0955198	0.0791055	49
17.9503	0.0970694	0.0718323	44		0.16926	0.0796366	34		0.0948918	0.0810389	49
18.0001	0.0970591	0.0727467	44		0.169864	0.082119	34		0.100336	0.0788493	49
18.0501	0.0973829	0.0725787	44		0.166236	0.0836709	34		0.0958994	0.0758526	49
18.1002	0.0976386	0.0731348	44		0.169063	0.0811755	34		0.0954464	0.0783564	49
18.1501	0.0960714	0.0737847	44		0.165932	0.0805905	34		0.0922525	0.0773887	49
18.2002	0.0950316	0.0714691	44		0.165036	0.0820291	34		0.100754	0.0778296	49
18.2501	0.0961394	0.0714019	44		0.165061	0.0850629	34		0.0996351	0.0769787	49
18.3	0.0938291	0.0703381	44		0.162901	0.0815627	34		0.0985549	0.0755644	49
18.3501	0.0952778	0.0722036	44		0.162069	0.0824977	34		0.0828746	0.0792989	49
18.4001	0.0946447	0.0709532	44		0.164924	0.0800852	34		0.0971489	0.0756996	49
18.4502	0.0964343	0.0723984	44		0.166078	0.0812732	34		0.0980846	0.0765482	49
18.5	0.0869899	0.0677124	44		0.155773	0.0738508	34		0.0884338	0.0755309	49
18.55	0.0867613	0.0631342	44		0.152842	0.0746408	34		0.0880968	0.0725829	49
18.6001	0.0811417	0.0615724	44		0.147667	0.0741632	34		0.0887211	0.0689576	49
18.6501	0.0800881	0.0608127	44		0.147591	0.0705247	34		0.0782704	0.0573488	49
18.7002	0.0773208	0.0584787	44		0.140989	0.0730526	34		0.0742129	0.0494095	49
18.7502	0.0719763	0.0612316	44		0.129858	0.0699221	34		0.0644485	0.0444869	49
18.8002	0.0703976	0.0557259	44		0.116583	0.0632879	34		0.0623251	0.0366099	49
18.8501	0.0642439	0.0523043	44		0.110025	0.0611494	34		0.0580403	0.0371967	49
18.9	0.0630334	0.0475219	44		0.102103	0.0601873	34		0.0519692	0.0316208	49
18.9501	0.0574888	0.042157	44		0.0956393	0.0568865	34		0.0452344	0.0297823	49
19.0002	0.0536055	0.0423086	44		0.0877934	0.0580709	34		0.0361473	0.0291141	49
19.0502	0.0470268	0.0364435	44		0.0794651	0.0568213	34		0.0306353	0.0263392	49
19.1	0.0459549	0.0333358	44		0.076575	0.0566243	34		0.0266437	0.0241164	49
19.15	0.0412875	0.0330742	44		0.0735585	0.0562849	34		0.0220771	0.0215154	49
19.2001	0.0360405	0.0314162	44		0.0671508	0.0554365	34		0.0155401	0.0212106	49
19.2502	0.0349481	0.0275358	44		0.0621166	0.0524809	34		0.0214803	0.020644	49
19.3002	0.0324034	0.0270278	44		0.0556706	0.0492381	34		0.0177274	0.0202897	49
19.3503	0.0287541	0.0255849	44		0.0527776	0.0486778	34		0.0102994	0.0163055	49
19.4002	0.0281503	0.0234381	44		0.0486434	0.0480679	34		0.0136555	0.0158186	49
19.4501	0.0276965	0.0209231	44		0.0460739	0.0418858	34		-0.00235194	0.0158328	49
19.5002	0.0237108	0.0192506	44		0.0408456	0.0398653	34		0.0112565	0.0157202	49
19.5501	0.0221365	0.0178686	44		0.040829	0.0386322	34		0.00871717	0.0138734	49
19.6002	0.0232326	0.0165426	44		0.0382565	0.0388406	34		0.00212559	0.0162155	49
19.6502	0.0187492	0.0156869	44		0.0345546	0.0344701	34		0.00151811	0.0146356	49
19.7	0.0187089	0.0141112	44		0.0325469	0.032624	34		-0.00046892	0.0142138	49
19.7501	0.0162504	0.0153057	44		0.030745	0.032879	34		0.000739505	0.010526	49
19.8001	0.014467	0.012018	44		0.0281696	0.0331621	34		-0.00292934	0.0118356	49
19.8502	0.0132494	0.0129273	44		0.0259088	0.0323085	34		0.000699544	0.0129689	49
19.9002	0.014925	0.0124007	44		0.0229805	0.0248865	34		-0.00500339	0.011219	49
19.95	0.0137187	0.00970484	44		0.0254227	0.0251763	34		-0.0010245	0.01077	49
20.0001	0.0115579	0.00986308	44		0.0223855	0.0240742	34		0.00193847	0.0107943	49
20.0501	0.0122608	0.00924006	44		0.0219924	0.0246054	34		-0.00221445	0.0122392	49
20.1002	0.0127681	0.00897644	44		0.020214	0.0220882	34		-0.00180602	0.00906093	49
20.1502	0.0133436	0.00973815	44		0.0202591	0.0225894	34		-0.0054294	0.0119023	49
20.2002	0.0117078	0.0102749	44		0.0224778	0.0187915	34		0.0024404	0.00803924	49
20.2501	0.0111878	0.00813035	44		0.016267	0.0149077	34		0.000685199	0.0105549	49
20.3001	0.0115406	0.0101278	44		0.016018	0.0161557	34		-0.00167682	0.00680719	49
20.3501	0.0116365	0.0096543	44		0.0142513	0.0154116	34		-0.00413656	0.00994855	49
20.4001	0.0107984	0.0093588	44		0.0140817	0.0148507	34		1.73364e-05	0.0106997	49
20.4502	0.0110716	0.00926009	44		0.012968	0.0148513	34		0.00139396	0.00979099	49
20.5001	0.0130856	0.0110983	44		0.0179455	0.013736	34		-0.000308962	0.0114136	49
20.5501	0.0121065	0.010824	44		0.0143435	0.0124418	34		-0.00170734	0.00746883	49
20.6001	0.0102342	0.00902233	44		0.0137768	0.0120924	34		0.00393292	0.012809	49
20.6501	0.0124573	0.0106779	44		0.0111013	0.0097018	34		-0.00144045	0.00827413	49
20.7002	0.0114009	0.0106303	44		0.012114	0.0099322	34		0.000599815	0.0108715	49
20.75	0.0116286	0.00923785	44		0.0111414	0.00846803	34		-0.00405537	0.00698107	49
20.8	0.0135585	0.00961158	44		0.011413	0.00980113	34		0.00214398	0.00874831	49
20.8501	0.0106475	0.0113343	44		0.0122875	0.0113245	34		-0.00289303	0.00818756	49
20.9001	0.0104342	0.00982057	44		0.012806	0.0119684	34		-0.00033685	0.00804052	49
20.9502	0.0122891	0.0110271	44		0.0122482	0.0105237	34		0.00544887	0.00996639	49
21.0002	0.00981214	0.0123466	44		0.00681673	0.0121368	34		-0.00138359	0.00817368	49

## Sheet: Fig.2F
														Basal ratios
	MCF-7 ctrl				MCF-7 + BKCa - RFP				MCF-7 + BKCa-DEC - RFP					MCF-7
Time (min)	Average	SD	N (cells)		Average	SD	N (cells)		Average	SD	N (cells)			ctrl	+BKCa - RFP	+BKCa-DEC - RFP
0	0.460965	0.202878	25		0.296642	0.188027	35		0.267841	0.210147	38			0.358019	0.584127	0.18644
0.04495	0.454074	0.199586	25		0.30214	0.192737	35		0.271585	0.206287	38			0.372112	0.401065	0.0900874
0.094917	0.464459	0.189973	25		0.298039	0.19376	35		0.271745	0.203147	38			0.313595	0.133359	0.136514
0.144583	0.468604	0.190986	25		0.298393	0.193696	35		0.27179	0.205459	38			0.594586	0.218215	0.00829273
0.195217	0.471133	0.190469	25		0.300261	0.193957	35		0.274279	0.204313	38			0.38652	0.341597	0.219544
0.244567	0.465088	0.19157	25		0.302038	0.193579	35		0.272257	0.199881	38			0.463568	0.316494	0.161288
0.2952	0.473924	0.188391	25		0.305789	0.195657	35		0.272941	0.207933	38			0.306975	0.409328	0.186045
0.344712	0.462606	0.191578	25		0.304936	0.195232	35		0.281168	0.209995	38			0.948406	0.251537	-0.123369
0.402137	0.466491	0.192044	25		0.303263	0.193453	35		0.276781	0.202722	38			0.459873	0.2168	0.0802561
0.452632	0.468302	0.186243	25		0.301915	0.19147	35		0.273399	0.200361	38			0.468268	0.199727	0.417824
0.502467	0.463142	0.188788	25		0.298773	0.187849	35		0.276525	0.204176	38			0.289046	0.111874	0.120626
0.552865	0.471783	0.192193	25		0.292984	0.185228	35		0.274126	0.19767	38			0.314985	0.0769735	0.144576
0.602183	0.468319	0.184152	25		0.307594	0.193294	35		0.266062	0.195559	38			0.135084	0.318438	0.212989
0.652265	0.469278	0.187232	25		0.301994	0.187788	35		0.273191	0.199752	38			0.0530645	0.459314	0.126082
0.702383	0.463022	0.189566	25		0.302071	0.189923	35		0.280246	0.200879	38			0.623388	0.442411	0.225858
0.752483	0.47174	0.189319	25		0.30536	0.189207	35		0.281486	0.202288	38			0.624078	-0.0280303	0.122789
0.802315	0.466189	0.186786	25		0.30263	0.189947	35		0.277463	0.19958	38			0.423799	0.117639	0.113432
0.85223	0.477776	0.185834	25		0.300416	0.188641	35		0.279923	0.202307	38			0.661124	0.481337	0.14132
0.902378	0.479517	0.183148	25		0.300462	0.188465	35		0.279073	0.203439	38			0.606782	0.119467	0.0239241
0.952313	0.473822	0.187498	25		0.303229	0.190611	35		0.27609	0.20116	38			0.72735	0.0137443	0.374997
1.00209	0.473503	0.180718	25		0.292033	0.184719	35		0.276953	0.200271	38			0.677814	0.0649529	0.654389
1.05231	0.475569	0.187189	25		0.303143	0.191172	35		0.274464	0.201157	38			0.533528	0.0451152	0.785798
1.10246	0.474317	0.182924	25		0.304742	0.195075	35		0.273635	0.204571	38			0.369412	0.0262028	0.504185
1.15218	0.473612	0.184358	25		0.294726	0.184017	35		0.28184	0.207019	38			0.531508	0.139051	0.418432
1.20226	0.46773	0.195356	25		0.296341	0.185973	35		0.27209	0.202132	38			0.471357	0.163464	0.231066
1.25229	0.472147	0.191858	25		0.298322	0.185638	35		0.27616	0.201808	38				0.631692	0.29626
1.30218	0.472834	0.190439	25		0.296428	0.18836	35		0.275887	0.202299	38				0.65411	0.208312
1.35227	0.472491	0.19104	25		0.296045	0.184125	35		0.271921	0.199308	38				0.359204	0.45459
1.40234	0.47308	0.190403	25		0.299079	0.18841	35		0.276643	0.201795	38				0.517948	0.319054
1.45224	0.462412	0.19827	25		0.294315	0.184584	35		0.273444	0.204122	38				0.457547	0.522197
1.50234	0.465862	0.197185	25		0.295936	0.185323	35		0.27435	0.199795	38				0.462737	0.710667
1.55274	0.465105	0.194668	25		0.299976	0.186449	35		0.278304	0.211756	38				0.459501	0.487265
1.60214	0.453911	0.209997	25		0.293982	0.182295	35		0.274248	0.204378	38				0.449322	0.577651
1.65228	0.467762	0.194575	25		0.295255	0.18648	35		0.271655	0.199639	38				0.392487	0.205062
1.70231	0.470272	0.190379	25		0.301322	0.186412	35		0.278179	0.207126	38				0.392487	0.269668
1.75232	0.469629	0.18997	25		0.295131	0.188564	35		0.273443	0.202169	38					0.412654
1.80229	0.473578	0.19215	25		0.29743	0.184771	35		0.276995	0.201888	38					0.356192
1.85237	0.475873	0.183956	25		0.297431	0.183267	35		0.272226	0.203739	38					0.0795078
1.90229	0.476015	0.188492	25		0.295104	0.185164	35		0.277469	0.203874	38
1.95237	0.476319	0.18878	25		0.295992	0.182959	35		0.278865	0.206009	38
2.0023	0.477317	0.186667	25		0.291419	0.180793	35		0.276805	0.201758	38
2.05229	0.475114	0.191005	25		0.290234	0.182068	35		0.273263	0.198419	38
2.1023	0.4761	0.194381	25		0.296483	0.185721	35		0.278469	0.206207	38
2.15219	0.472921	0.190603	25		0.295445	0.184359	35		0.27492	0.20079	38
2.20222	0.46376	0.190365	25		0.291418	0.185914	35		0.269562	0.198033	38
2.25229	0.462245	0.195603	25		0.29385	0.181054	35		0.273846	0.201791	38
2.3022	0.466441	0.194406	25		0.290509	0.184065	35		0.277817	0.201167	38
2.35217	0.470388	0.188642	25		0.295897	0.186328	35		0.282294	0.208724	38
2.40232	0.463089	0.19396	25		0.292612	0.182244	35		0.278333	0.205616	38
2.45238	0.46528	0.193448	25		0.293688	0.183919	35		0.273435	0.201942	38
2.50229	0.473026	0.183806	25		0.290136	0.18354	35		0.274732	0.199465	38
2.55233	0.463628	0.194825	25		0.284009	0.181195	35		0.273861	0.199944	38
2.6024	0.465638	0.19151	25		0.290846	0.182448	35		0.274894	0.201234	38
2.65222	0.46629	0.186574	25		0.29382	0.183031	35		0.275194	0.203944	38
2.70216	0.463143	0.185646	25		0.296513	0.186734	35		0.280128	0.204936	38
2.7523	0.460225	0.190108	25		0.298883	0.18663	35		0.272525	0.198837	38
2.80231	0.456599	0.187646	25		0.29038	0.181248	35		0.277917	0.204373	38
2.85231	0.458066	0.197669	25		0.293085	0.18645	35		0.277314	0.206459	38
2.90231	0.467763	0.185111	25		0.29657	0.182985	35		0.278068	0.205219	38
2.95238	0.4749	0.181296	25		0.293231	0.182778	35		0.269566	0.198311	38
3.00223	0.460403	0.188302	25		0.29139	0.18645	35		0.27266	0.201863	38
3.0522	0.466159	0.189266	25		0.296618	0.182569	35		0.280781	0.208503	38
3.10233	0.463388	0.187572	25		0.295514	0.1823	35		0.273875	0.200231	38
3.15223	0.471566	0.189232	25		0.295507	0.180366	35		0.275317	0.202423	38
3.20226	0.474267	0.185649	25		0.292576	0.18159	35		0.276437	0.205872	38
3.25214	0.47559	0.184902	25		0.293935	0.182441	35		0.277489	0.202203	38
3.30226	0.476432	0.193191	25		0.288986	0.177914	35		0.27486	0.201608	38
3.35286	0.474738	0.189681	25		0.288461	0.17803	35		0.263499	0.2047	38
3.40246	0.477683	0.189906	25		0.288476	0.18171	35		0.266376	0.207598	38
3.45234	0.476952	0.188047	25		0.288633	0.176653	35		0.267994	0.207929	38
3.50221	0.47491	0.192414	25		0.281464	0.173731	35		0.263686	0.201563	38
3.55227	0.47563	0.192523	25		0.292466	0.182342	35		0.268482	0.204847	38
3.60218	0.478131	0.196192	25		0.285961	0.177305	35		0.269098	0.204352	38
3.65234	0.475719	0.195947	25		0.288265	0.176645	35		0.27488	0.210549	38
3.70222	0.476551	0.196332	25		0.284271	0.176593	35		0.266978	0.205293	38
3.75237	0.487245	0.190732	25		0.292293	0.183618	35		0.270775	0.205842	38
3.80279	0.479101	0.195314	25		0.289806	0.180777	35		0.276646	0.210585	38
3.85227	0.475885	0.196812	25		0.292165	0.179338	35		0.272164	0.206727	38
3.90221	0.478636	0.194862	25		0.287366	0.17593	35		0.26868	0.208318	38
3.95217	0.480284	0.189356	25		0.285594	0.179256	35		0.273665	0.206151	38
4.00225	0.478743	0.195063	25		0.287128	0.176451	35		0.281653	0.206359	38
4.05234	0.47551	0.195401	25		0.287357	0.180824	35		0.283402	0.206735	38
4.10227	0.480076	0.192667	25		0.287344	0.179896	35		0.280554	0.202949	38
4.15233	0.486182	0.196473	25		0.282677	0.1747	35		0.280778	0.202829	38
4.20222	0.491491	0.203395	25		0.284469	0.17655	35		0.272302	0.20035	38
4.25233	0.493839	0.204117	25		0.282404	0.175504	35		0.274918	0.200963	38
4.30225	0.513466	0.181987	25		0.288412	0.179076	35		0.273662	0.200852	38
4.35238	0.481856	0.200856	25		0.28234	0.178826	35		0.271443	0.197913	38
4.40218	0.490757	0.199464	25		0.283199	0.179078	35		0.26897	0.197817	38
4.45235	0.485802	0.204757	25		0.28641	0.176433	35		0.267111	0.193179	38
4.50225	0.480261	0.200045	25		0.280256	0.176318	35		0.267623	0.193199	38
4.55238	0.490046	0.200109	25		0.281677	0.180607	35		0.268956	0.203734	38
4.60215	0.485897	0.198812	25		0.285489	0.179168	35		0.268337	0.199915	38
4.65226	0.479335	0.203172	25		0.287015	0.179817	35		0.271635	0.196501	38
4.70228	0.503775	0.185726	25		0.284489	0.179549	35		0.270673	0.197688	38
4.75221	0.477763	0.218458	25		0.284176	0.179212	35		0.278114	0.200398	38
4.80223	0.479275	0.193807	25		0.278744	0.172098	35		0.269344	0.195671	38
4.85235	0.475668	0.190696	25		0.282211	0.178745	35		0.271128	0.19585	38
4.90218	0.469481	0.185192	25		0.281075	0.176552	35		0.263295	0.190248	38
4.95218	0.462946	0.189681	25		0.27727	0.176638	35		0.271035	0.194386	38
5.00236	0.46822	0.18586	25		0.276479	0.177292	35		0.267882	0.196046	38
5.05218	0.473354	0.171758	25		0.283611	0.17728	35		0.266498	0.194475	38
5.10233	0.465284	0.186524	25		0.290116	0.181042	35		0.267022	0.195453	38
5.15274	0.468878	0.179271	25		0.278727	0.173731	35		0.26401	0.194491	38
5.20233	0.467125	0.182152	25		0.280643	0.178848	35		0.262675	0.19149	38
5.25221	0.46529	0.183477	25		0.27581	0.174326	35		0.267235	0.194319	38
5.3022	0.465275	0.1769	25		0.2815	0.177612	35		0.268485	0.198139	38
5.35229	0.459956	0.174601	25		0.27699	0.174031	35		0.265078	0.194292	38
5.40222	0.464754	0.177031	25		0.279939	0.175008	35		0.264157	0.193577	38
5.45239	0.461327	0.176327	25		0.273808	0.17315	35		0.264807	0.192871	38
5.50224	0.454063	0.182241	25		0.276666	0.175155	35		0.261593	0.190211	38
5.55234	0.455177	0.178205	25		0.274768	0.172829	35		0.261815	0.19082	38
5.60224	0.451451	0.179804	25		0.274697	0.174143	35		0.259757	0.191503	38
5.65234	0.45377	0.178336	25		0.278019	0.174106	35		0.26204	0.19598	38
5.70226	0.450558	0.178809	25		0.277904	0.17374	35		0.260945	0.191202	38
5.75229	0.456209	0.178103	25		0.279154	0.17366	35		0.25301	0.18499	38
5.80214	0.452082	0.173251	25		0.273262	0.172831	35		0.254372	0.189707	38
5.8522	0.456858	0.174708	25		0.269931	0.169043	35		0.258081	0.19043	38
5.90221	0.453282	0.180309	25		0.272478	0.17139	35		0.253785	0.190543	38
5.9523	0.446086	0.175162	25		0.276139	0.1719	35		0.259098	0.185364	38
6.00223	0.447796	0.174597	25		0.273533	0.175026	35		0.25712	0.18563	38
6.05229	0.453659	0.17437	25		0.27248	0.174763	35		0.260079	0.193976	38
6.10224	0.450999	0.174474	25		0.278534	0.174014	35		0.250887	0.188905	38
6.15237	0.448573	0.168525	25		0.276579	0.174394	35		0.252981	0.190136	38
6.20223	0.450208	0.171367	25		0.270182	0.171139	35		0.250412	0.186246	38
6.25235	0.44578	0.171659	25		0.274433	0.173893	35		0.254418	0.18661	38
6.30228	0.442528	0.169455	25		0.271921	0.170051	35		0.251079	0.186659	38
6.35235	0.446061	0.173525	25		0.274263	0.173031	35		0.248853	0.182951	38
6.40223	0.440941	0.171336	25		0.273053	0.17552	35		0.248169	0.180688	38
6.4523	0.44566	0.165352	25		0.270583	0.172134	35		0.249038	0.184817	38
6.50213	0.442758	0.168414	25		0.267673	0.169424	35		0.256362	0.18763	38
6.55222	0.442911	0.168866	25		0.277291	0.17611	35		0.248663	0.180908	38
6.60238	0.430326	0.172885	25		0.268737	0.166271	35		0.252465	0.184383	38
6.65238	0.432492	0.170561	25		0.274498	0.169795	35		0.255798	0.180603	38
6.70213	0.440276	0.166572	25		0.277541	0.176504	35		0.249964	0.177359	38
6.75216	0.435876	0.169154	25		0.270299	0.170075	35		0.241085	0.181952	38
6.80223	0.438867	0.166131	25		0.263059	0.167256	35		0.245124	0.185751	38
6.85237	0.438167	0.165286	25		0.26453	0.167073	35		0.243537	0.179614	38
6.90214	0.435975	0.165745	25		0.271321	0.173554	35		0.242028	0.181278	38
6.95235	0.430148	0.168959	25		0.273113	0.173865	35		0.242784	0.178068	38
7.00239	0.432847	0.164949	25		0.268729	0.168631	35		0.2458	0.186097	38
7.05218	0.431116	0.163245	25		0.265357	0.168159	35		0.244129	0.183679	38
7.10221	0.43315	0.170444	25		0.270493	0.171685	35		0.240626	0.183435	38
7.15233	0.439285	0.166083	25		0.266209	0.167408	35		0.240501	0.181215	38
7.20233	0.434026	0.167294	25		0.272088	0.174866	35		0.248088	0.190907	38
7.25232	0.431261	0.163096	25		0.263101	0.165554	35		0.240912	0.185998	38
7.30212	0.431918	0.167623	25		0.268805	0.172246	35		0.245939	0.188294	38
7.35217	0.426931	0.166144	25		0.267938	0.170472	35		0.241964	0.182959	38
7.40222	0.424179	0.166241	25		0.268959	0.174618	35		0.24941	0.176458	38
7.45216	0.428956	0.163671	25		0.270765	0.17377	35		0.25462	0.183264	38
7.50234	0.421527	0.165171	25		0.266201	0.170622	35		0.252248	0.176199	38
7.55219	0.426814	0.166042	25		0.265352	0.168326	35		0.248677	0.176363	38
7.60234	0.424699	0.163587	25		0.264859	0.169153	35		0.249729	0.179301	38
7.65221	0.426179	0.165669	25		0.266122	0.171602	35		0.259869	0.187677	38
7.70219	0.422311	0.161222	25		0.269362	0.171465	35		0.246863	0.180144	38
7.75235	0.42334	0.161658	25		0.263722	0.169583	35		0.242022	0.176096	38
7.80227	0.41892	0.160691	25		0.263394	0.167881	35		0.249546	0.18093	38
7.8521	0.427614	0.163824	25		0.264788	0.168073	35		0.240945	0.173487	38
7.90237	0.419636	0.163277	25		0.266165	0.170532	35		0.246977	0.181527	38
7.95219	0.418245	0.159685	25		0.264153	0.16482	35		0.244604	0.182242	38
8.00224	0.410046	0.155748	25		0.262292	0.166949	35		0.239124	0.177759	38
8.05235	0.419897	0.157868	25		0.262386	0.16686	35		0.240983	0.178434	38
8.10217	0.413278	0.162503	25		0.259722	0.163674	35		0.242128	0.18177	38
8.15234	0.412228	0.159403	25		0.265344	0.165667	35		0.230214	0.167006	38
8.20233	0.415049	0.160899	25		0.263651	0.166205	35		0.233921	0.175847	38
8.25233	0.411874	0.155894	25		0.26015	0.165211	35		0.235611	0.176489	38
8.30222	0.411145	0.160522	25		0.263698	0.165712	35		0.244706	0.185854	38
8.35226	0.413272	0.156688	25		0.262176	0.166818	35		0.233668	0.176345	38
8.40238	0.40852	0.156444	25		0.2632	0.161614	35		0.236151	0.172389	38
8.45227	0.410323	0.158494	25		0.253864	0.160069	35		0.234664	0.173552	38
8.5022	0.408029	0.157155	25		0.259994	0.161639	35		0.237563	0.178306	38
8.55224	0.406724	0.158389	25		0.263101	0.163863	35		0.241557	0.182226	38
8.60213	0.415227	0.157564	25		0.261482	0.160547	35		0.234566	0.173048	38
8.6522	0.399231	0.151967	25		0.257783	0.164948	35		0.230402	0.169351	38
8.70236	0.405652	0.158958	25		0.260255	0.166479	35		0.244148	0.178329	38
8.75216	0.402173	0.155864	25		0.25625	0.1617	35		0.240939	0.181304	38
8.8023	0.406489	0.158594	25		0.262019	0.167042	35		0.232656	0.173869	38
8.8522	0.401717	0.155179	25		0.262651	0.166603	35		0.241345	0.180282	38
8.90234	0.400175	0.159096	25		0.256442	0.159457	35		0.234744	0.171633	38
8.95226	0.399169	0.155323	25		0.255577	0.161617	35		0.23239	0.177228	38
9.00233	0.403714	0.157468	25		0.258029	0.164395	35		0.233936	0.176109	38
9.05214	0.394151	0.155272	25		0.25532	0.162364	35		0.230045	0.170733	38
9.10228	0.395008	0.158063	25		0.253275	0.162931	35		0.234273	0.174535	38
9.15231	0.378664	0.157108	25		0.253509	0.162105	35		0.22946	0.170712	38
9.20221	0.395666	0.15833	25		0.249706	0.15866	35		0.233743	0.174669	38
9.25224	0.398203	0.159585	25		0.254302	0.163227	35		0.229284	0.170212	38
9.30226	0.38984	0.157508	25		0.253199	0.163243	35		0.2289	0.169288	38
9.35214	0.38167	0.154764	25		0.248002	0.157917	35		0.228901	0.173464	38
9.40232	0.391256	0.153635	25		0.25503	0.16328	35		0.23533	0.180345	38
9.45225	0.392284	0.152718	25		0.246486	0.15792	35		0.233233	0.176735	38
9.50236	0.388871	0.155803	25		0.24226	0.15563	35		0.228904	0.177335	38
9.55227	0.388104	0.155693	25		0.244408	0.155361	35		0.221457	0.163349	38
9.60214	0.385242	0.157753	25		0.251358	0.162197	35		0.228641	0.173478	38
9.65216	0.377874	0.151349	25		0.24276	0.154268	35		0.225288	0.167621	38
9.70282	0.384709	0.153869	25		0.243442	0.156544	35		0.220331	0.165236	38
9.75235	0.380898	0.151494	25		0.247121	0.158069	35		0.223165	0.164648	38
9.80222	0.373752	0.151963	25		0.244285	0.157382	35		0.22033	0.163145	38
9.85214	0.375544	0.147263	25		0.248424	0.15804	35		0.217005	0.160258	38
9.90219	0.376315	0.153272	25		0.240617	0.156233	35		0.222	0.162829	38
9.95237	0.375758	0.14665	25		0.243107	0.155154	35		0.223978	0.168783	38
10.0022	0.372752	0.144386	25		0.243074	0.154273	35		0.218281	0.158773	38
10.0522	0.362889	0.143039	25		0.239376	0.154818	35		0.212312	0.156178	38
10.1023	0.360086	0.144698	25		0.246126	0.157141	35		0.216432	0.161213	38
10.1522	0.360944	0.139013	25		0.241096	0.15659	35		0.212712	0.161822	38
10.2022	0.36148	0.144807	25		0.23748	0.153441	35		0.216634	0.161135	38
10.2523	0.35476	0.13395	25		0.242612	0.156623	35		0.217229	0.161361	38
10.3023	0.35378	0.137391	25		0.237005	0.153761	35		0.212211	0.158929	38
10.3522	0.352249	0.140973	25		0.228823	0.149711	35		0.210899	0.153624	38
10.4024	0.347922	0.138212	25		0.237815	0.15474	35		0.216339	0.164415	38
10.4523	0.350944	0.13765	25		0.231339	0.151441	35		0.213948	0.158868	38
10.5022	0.343997	0.139166	25		0.232942	0.151209	35		0.212263	0.156123	38
10.5523	0.343254	0.140058	25		0.226877	0.14697	35		0.209838	0.153749	38
10.6022	0.34215	0.13498	25		0.234938	0.153732	35		0.213699	0.158637	38
10.6522	0.340324	0.133026	25		0.236356	0.155858	35		0.216231	0.162872	38
10.7022	0.343062	0.142331	25		0.229542	0.150078	35		0.213086	0.157167	38
10.7523	0.339607	0.1324	25		0.228423	0.148353	35		0.205556	0.149088	38
10.8021	0.343189	0.135891	25		0.231169	0.153551	35		0.207231	0.152862	38
10.8522	0.339358	0.139171	25		0.232637	0.154168	35		0.204371	0.148123	38
10.9023	0.349423	0.126464	25		0.231318	0.147904	35		0.207692	0.150664	38
10.9523	0.331263	0.137418	25		0.232993	0.150812	35		0.197288	0.141477	38
11.0023	0.330995	0.134897	25		0.224233	0.146632	35		0.212126	0.157901	38
11.0521	0.331427	0.138585	25		0.219084	0.144143	35		0.200156	0.151554	38
11.1023	0.329665	0.135891	25		0.222467	0.145612	35		0.205505	0.146645	38
11.1522	0.327714	0.13518	25		0.219544	0.141741	35		0.203098	0.146728	38
11.2022	0.324346	0.132012	25		0.218756	0.147023	35		0.194045	0.140118	38
11.2523	0.324252	0.13231	25		0.221876	0.145634	35		0.203285	0.144944	38
11.3023	0.323738	0.149042	25		0.215942	0.143712	35		0.202048	0.145077	38
11.3521	0.317892	0.130008	25		0.217024	0.143074	35		0.197187	0.141483	38
11.4022	0.316515	0.12922	25		0.215355	0.143462	35		0.194821	0.139025	38
11.4523	0.315724	0.137536	25		0.213098	0.141952	35		0.202188	0.143394	38
11.5022	0.320341	0.132479	25		0.218464	0.146889	35		0.201026	0.143502	38
11.5523	0.317608	0.145116	25		0.213178	0.141048	35		0.195235	0.138794	38
11.6023	0.309785	0.131763	25		0.215537	0.143065	35		0.20342	0.145605	38
11.6521	0.307068	0.12969	25		0.209774	0.139527	35		0.198313	0.143424	38
11.7023	0.308529	0.13247	25		0.214411	0.146547	35		0.196476	0.14192	38
11.7523	0.321634	0.152187	25		0.209927	0.138088	35		0.194435	0.141694	38
11.8023	0.295468	0.125862	25		0.209778	0.137188	35		0.191297	0.138644	38
11.8522	0.305159	0.140363	25		0.212526	0.143483	35		0.191764	0.140854	38
11.9023	0.302728	0.135738	25		0.211385	0.138655	35		0.19315	0.139791	38
11.9523	0.301096	0.129357	25		0.211485	0.139364	35		0.188883	0.139968	38
12.0022	0.301235	0.132315	25		0.207476	0.13766	35		0.187537	0.13854	38
12.0523	0.29432	0.135748	25		0.209	0.136342	35		0.180479	0.136181	38
12.1022	0.292936	0.128899	25		0.209203	0.138658	35		0.192917	0.141688	38
12.1524	0.293161	0.130474	25		0.204322	0.136928	35		0.18636	0.136304	38
12.2023	0.289414	0.129528	25		0.207244	0.138306	35		0.181675	0.13149	38
12.2522	0.291751	0.129561	25		0.20522	0.143264	35		0.186148	0.139612	38
12.3023	0.286572	0.127643	25		0.200125	0.134877	35		0.183197	0.133469	38
12.3524	0.289392	0.132095	25		0.203732	0.135428	35		0.188734	0.138398	38
12.4022	0.281932	0.130115	25		0.203957	0.137631	35		0.178154	0.126394	38
12.4522	0.289367	0.132383	25		0.198036	0.132873	35		0.186083	0.130862	38
12.5021	0.278783	0.12332	25		0.196967	0.133176	35		0.186297	0.130872	38
12.5522	0.279218	0.128783	25		0.193091	0.129814	35		0.178709	0.128491	38
12.6023	0.272831	0.12366	25		0.195875	0.133055	35		0.18362	0.125992	38
12.6524	0.274372	0.129069	25		0.195194	0.129901	35		0.184678	0.129875	38
12.7023	0.280029	0.115373	25		0.19625	0.131736	35		0.180005	0.125929	38
12.7522	0.272381	0.126557	25		0.196555	0.131111	35		0.179162	0.12647	38
12.8024	0.264107	0.126764	25		0.194491	0.130465	35		0.179939	0.126622	38
12.8524	0.26885	0.135628	25		0.191966	0.127626	35		0.177747	0.130001	38
12.9023	0.268072	0.127309	25		0.195159	0.132237	35		0.180238	0.125685	38
12.9522	0.262951	0.130494	25		0.191095	0.128899	35		0.169458	0.12182	38
13.0021	0.265983	0.132267	25		0.189739	0.127726	35		0.178409	0.125546	38
13.0521	0.256905	0.125339	25		0.191466	0.125771	35		0.169532	0.130187	38
13.1023	0.265254	0.131653	25		0.188399	0.126022	35		0.170138	0.127372	38
13.1528	0.261259	0.131123	25		0.190604	0.125725	35		0.169389	0.127871	38
13.2023	0.25462	0.128664	25		0.184748	0.124101	35		0.165499	0.124171	38
13.2521	0.253398	0.131643	25		0.192383	0.127594	35		0.170471	0.123986	38
13.3023	0.255998	0.126503	25		0.188722	0.127802	35		0.176779	0.134759	38
13.3523	0.251621	0.124608	25		0.182129	0.121467	35		0.164228	0.123395	38
13.4023	0.250014	0.122371	25		0.184378	0.123691	35		0.16684	0.124711	38
13.4524	0.245785	0.124429	25		0.189168	0.126206	35		0.166727	0.125082	38
13.5022	0.24655	0.124367	25		0.185126	0.122928	35		0.165645	0.127912	38
13.5524	0.253437	0.129207	25		0.185636	0.12406	35		0.161328	0.123238	38
13.6022	0.244097	0.13022	25		0.177988	0.121254	35		0.164884	0.127921	38
13.6524	0.247279	0.12521	25		0.182981	0.12408	35		0.162974	0.124772	38
13.7022	0.254008	0.122185	25		0.183148	0.121587	35		0.167426	0.127785	38
13.7523	0.238153	0.1225	25		0.181917	0.121181	35		0.160281	0.122573	38
13.8022	0.23618	0.124551	25		0.171196	0.112903	35		0.159898	0.120812	38
13.8523	0.238648	0.124559	25		0.175934	0.120288	35		0.157302	0.119139	38
13.9022	0.231888	0.118562	25		0.177563	0.121859	35		0.156691	0.114373	38
13.9522	0.236203	0.130002	25		0.17445	0.115651	35		0.162109	0.118661	38
14.0021	0.227544	0.125348	25		0.175968	0.120579	35		0.16283	0.116976	38
14.0522	0.233793	0.132809	25		0.175394	0.115676	35		0.162955	0.115597	38
14.1023	0.228017	0.128519	25		0.178972	0.117405	35		0.158226	0.116251	38
14.1522	0.226415	0.127921	25		0.171299	0.112591	35		0.160235	0.113472	38
14.2024	0.222874	0.120268	25		0.172868	0.114689	35		0.155475	0.11368	38
14.2523	0.230205	0.122227	25		0.176123	0.111814	35		0.152335	0.111277	38
14.3024	0.223007	0.122315	25		0.176795	0.109517	35		0.150913	0.111342	38
14.3521	0.219289	0.128833	25		0.167285	0.103295	35		0.158278	0.116765	38
14.4023	0.224588	0.120314	25		0.17754	0.108514	35		0.141763	0.102707	38
14.4523	0.228966	0.128769	25		0.171946	0.107607	35		0.149784	0.11145	38
14.5023	0.22288	0.125988	25		0.172684	0.108999	35		0.142051	0.107866	38
14.5524	0.219773	0.124499	25		0.173153	0.108596	35		0.143986	0.110958	38
14.6024	0.219755	0.12171	25		0.171251	0.103448	35		0.145266	0.108553	38
14.6522	0.219739	0.122646	25		0.172409	0.104875	35		0.142522	0.110657	38
14.7023	0.222046	0.124028	25		0.168046	0.103092	35		0.145291	0.116777	38
14.7521	0.220947	0.127009	25		0.169404	0.103116	35		0.141622	0.112769	38
14.8022	0.213988	0.126251	25		0.16455	0.101075	35		0.138714	0.104916	38
14.8524	0.213097	0.127025	25		0.168128	0.100141	35		0.139669	0.106969	38
14.9022	0.209255	0.118584	25		0.167386	0.101816	35		0.139219	0.105223	38
14.9522	0.210336	0.118794	25		0.166198	0.102387	35		0.137381	0.105641	38
15.0023	0.209917	0.117833	25		0.161346	0.102423	35		0.135814	0.103592	38
15.0522	0.208087	0.12618	25		0.15601	0.0995526	35		0.132245	0.100699	38
15.1028	0.207794	0.114518	25		0.160419	0.104363	35		0.134852	0.103423	38
15.1524	0.205575	0.121026	25		0.153596	0.101778	35		0.139351	0.105546	38
15.2022	0.198231	0.131428	25		0.155208	0.104621	35		0.13889	0.107746	38
15.2521	0.202733	0.122975	25		0.157397	0.100876	35		0.141268	0.109912	38
15.3023	0.203678	0.122612	25		0.160186	0.0980956	35		0.139876	0.108215	38
15.3523	0.205526	0.124538	25		0.155949	0.102215	35		0.134994	0.103465	38
15.4023	0.194643	0.118492	25		0.150572	0.100956	35		0.137685	0.105271	38
15.4523	0.193717	0.11643	25		0.148172	0.100127	35		0.136936	0.105391	38
15.5022	0.197588	0.124117	25		0.152279	0.10054	35		0.136725	0.102912	38
15.5524	0.19616	0.119111	25		0.149576	0.100533	35		0.135121	0.103991	38
15.6022	0.197298	0.128661	25		0.143962	0.0964834	35		0.136573	0.103206	38
15.6523	0.19659	0.120982	25		0.145531	0.0964159	35		0.135415	0.103452	38
15.7023	0.186938	0.115338	25		0.145485	0.0950433	35		0.124206	0.0953744	38
15.7523	0.191494	0.121456	25		0.144457	0.0948933	35		0.131595	0.0987294	38
15.8023	0.190459	0.119803	25		0.138668	0.0903715	35		0.1396	0.105201	38
15.8522	0.189899	0.126512	25		0.142854	0.0931292	35		0.130511	0.0998412	38
15.9023	0.187039	0.124514	25		0.142737	0.0911198	35		0.133413	0.102546	38
15.9524	0.183743	0.117241	25		0.140977	0.0956636	35		0.135065	0.104311	38
16.0023	0.17766	0.12019	25		0.144043	0.0936614	35		0.121422	0.0980873	38
16.0523	0.182408	0.122205	25		0.140106	0.0945204	35		0.124463	0.10193	38
16.1024	0.183689	0.123721	25		0.137806	0.0945634	35		0.132239	0.103881	38
16.1523	0.189128	0.128609	25		0.138475	0.0926107	35		0.124648	0.0999392	38
16.2022	0.181879	0.130802	25		0.133178	0.0905059	35		0.129022	0.104155	38
16.2522	0.17226	0.114998	25		0.1367	0.0914678	35		0.12177	0.0979863	38
16.3022	0.178646	0.12014	25		0.136572	0.0884566	35		0.123602	0.104264	38
16.3522	0.177486	0.120289	25		0.132101	0.0875808	35		0.117859	0.10304	38
16.4023	0.174062	0.124261	25		0.134349	0.0871504	35		0.118858	0.102442	38
16.4522	0.189948	0.130586	25		0.137081	0.0875677	35		0.11719	0.103262	38
16.5023	0.190114	0.129631	25		0.130763	0.0893649	35		0.115303	0.101478	38
16.5521	0.186927	0.125619	25		0.13726	0.0916868	35		0.111206	0.0991129	38
16.6022	0.184606	0.127659	25		0.129755	0.0850236	35		0.113385	0.101201	38
16.6524	0.179787	0.133944	25		0.133578	0.0866504	35		0.119102	0.105668	38
16.7024	0.184952	0.116478	25		0.130803	0.0881418	35		0.115468	0.10464	38
16.7523	0.184123	0.127784	25		0.130589	0.0863646	35		0.111981	0.102278	38
16.8023	0.188419	0.116785	25		0.134103	0.0869742	35		0.118505	0.105427	38
16.8522	0.186956	0.125163	25		0.125483	0.0858674	35		0.109868	0.100317	38
16.9023	0.175272	0.123198	25		0.125202	0.0825523	35		0.114516	0.101153	38
16.9522	0.177653	0.123614	25		0.128028	0.0873977	35		0.116657	0.102568	38
17.0027	0.176201	0.119626	25		0.129442	0.0837441	35		0.111575	0.098443	38
17.0523	0.180536	0.136355	25		0.128762	0.0837283	35		0.117383	0.10005	38
17.1028	0.16409	0.124067	25		0.123739	0.0866826	35		0.119745	0.0996519	38
17.1522	0.158107	0.116575	25		0.126679	0.0800714	35		0.114805	0.0937509	38
17.2022	0.165206	0.117142	25		0.126347	0.0822554	35		0.121561	0.0973124	38
17.2522	0.157435	0.114512	25		0.125692	0.0811073	35		0.118084	0.0929945	38
17.3022	0.161392	0.123722	25		0.125878	0.0829403	35		0.121728	0.0944391	38
17.3523	0.170375	0.14023	25		0.124001	0.0811097	35		0.117211	0.0905787	38
17.4023	0.162315	0.126772	25		0.126069	0.085067	35		0.112573	0.0843437	38
17.4522	0.159904	0.126974	25		0.118637	0.0812899	35		0.121521	0.0880263	38
17.5023	0.153489	0.117232	25		0.119748	0.0789347	35		0.121717	0.0873628	38
17.5522	0.155057	0.122825	25		0.120314	0.0828487	35		0.12184	0.0877269	38
17.6023	0.154803	0.11943	25		0.119431	0.0785299	35		0.124124	0.0880285	38
17.6524	0.157367	0.122216	25		0.116348	0.0768838	35		0.1211	0.0850584	38
17.7023	0.154631	0.125499	25		0.121767	0.0771173	35		0.121267	0.0839285	38
17.7522	0.160986	0.12945	25		0.118898	0.0810065	35		0.117618	0.0851078	38
17.8024	0.167462	0.148633	25		0.115024	0.0747277	35		0.117088	0.0829737	38
17.8524	0.151043	0.11905	25		0.116386	0.0781575	35		0.119366	0.0843651	38
17.9022	0.158254	0.126934	25		0.115626	0.0758611	35		0.115941	0.0839685	38
17.9521	0.156269	0.12036	25		0.112022	0.0775011	35		0.114353	0.0830215	38
18.0024	0.153877	0.123469	25		0.117874	0.0780755	35		0.120122	0.0854852	38
18.0522	0.149549	0.124946	25		0.117836	0.0752961	35		0.120472	0.0850261	38
18.1024	0.1542	0.127999	25		0.116324	0.0772857	35		0.114102	0.083605	38
18.1523	0.150271	0.133588	25		0.114884	0.071419	35		0.111367	0.0837641	38
18.2023	0.15032	0.125489	25		0.116552	0.0741848	35		0.111022	0.0893174	38
18.2522	0.148618	0.120892	25		0.119252	0.0755901	35		0.112219	0.0921514	38
18.3023	0.145416	0.125477	25		0.120931	0.0771318	35		0.107915	0.0933872	38
18.3523	0.142199	0.126585	25		0.119188	0.0738423	35		0.109286	0.0953007	38
18.4021	0.141425	0.120751	25		0.114639	0.0760214	35		0.109051	0.0976792	38
18.4522	0.144253	0.130623	25		0.106321	0.0666579	35		0.109534	0.101195	38
18.5022	0.142445	0.124679	25		0.101649	0.0668014	35		0.104475	0.100318	38
18.5523	0.142013	0.136464	25		0.0899143	0.0649637	35		0.103023	0.100355	38
18.6023	0.136488	0.126108	25		0.0961767	0.0681251	35		0.0967238	0.0962651	38
18.6523	0.133618	0.127233	25		0.0877592	0.0575008	35		0.0707738	0.0882306	38
18.7022	0.135462	0.133274	25		0.0856416	0.0578866	35		0.0802144	0.088716	38
18.7523	0.131368	0.128026	25		0.080958	0.0562094	35		0.0814551	0.0927375	38
18.8023	0.118822	0.113477	25		0.0702775	0.0528699	35		0.073777	0.0833869	38
18.8522	0.109391	0.0994621	25		0.0663513	0.0530639	35		0.0657466	0.0828253	38
18.902	0.0976459	0.0934953	25		0.0590653	0.0493621	35		0.0671635	0.0871626	38
18.9521	0.0928989	0.0838498	25		0.0564159	0.0524194	35		0.0596937	0.0841898	38
19.0023	0.0808945	0.0766495	25		0.0541324	0.0463844	35		0.057628	0.0858846	38
19.0522	0.078418	0.0655823	25		0.052029	0.044625	35		0.0600888	0.0931491	38
19.1022	0.0689342	0.058254	25		0.0470885	0.043003	35		0.0544686	0.0797872	38
19.1521	0.0667763	0.0637241	25		0.040902	0.0443879	35		0.0555351	0.0859469	38
19.2023	0.0609718	0.0575486	25		0.0389041	0.043648	35		0.0454583	0.0825088	38
19.2524	0.062593	0.051967	25		0.0315523	0.0365795	35		0.0528929	0.0874064	38
19.3022	0.0491161	0.0509988	25		0.0285691	0.0383053	35		0.0491631	0.0854329	38
19.3521	0.0481666	0.0472451	25		0.0317053	0.0397528	35		0.0414688	0.0818049	38
19.4023	0.0445604	0.0481537	25		0.0226931	0.0421042	35		0.0384613	0.0846523	38
19.4523	0.0404066	0.0451344	25		0.0228157	0.0352728	35		0.0428621	0.0830294	38
19.5023	0.0354596	0.0388283	25		0.0208694	0.0346808	35		0.0398172	0.0819914	38
19.5523	0.0328004	0.0413012	25		0.0164001	0.0346191	35		0.0366468	0.0809349	38
19.6022	0.0286291	0.0364636	25		0.0138055	0.0370097	35		0.0376175	0.0881308	38
19.6522	0.0265776	0.0376463	25		0.0132075	0.0315598	35		0.0338002	0.083445	38
19.7022	0.0294587	0.0386703	25		0.0121438	0.0334051	35		0.0315993	0.0871343	38
19.7522	0.0247344	0.0346701	25		0.00933191	0.0326463	35		0.0274487	0.0841481	38
19.8022	0.0215392	0.0320467	25		0.0085116	0.0330115	35		0.0352606	0.0841639	38
19.8522	0.0179864	0.0298722	25		0.00968443	0.036725	35		0.0349376	0.0857535	38
19.9022	0.0227243	0.0296098	25		0.011158	0.0332666	35		0.0286137	0.0896837	38
19.9521	0.0177365	0.0292171	25		0.00475769	0.0265736	35		0.0331853	0.0889661	38
20.0024	0.0190865	0.0315771	25		0.0102084	0.0367138	35		0.0263802	0.0877072	38
20.0523	0.023045	0.0278331	25		0.00302203	0.0324035	35		0.0313085	0.0855837	38
20.1023	0.0134308	0.027871	25		0.00380437	0.0295269	35		0.0330596	0.0905522	38
20.1522	0.012922	0.0217978	25		0.00579789	0.0253354	35		0.0332106	0.0925012	38
20.2024	0.0108357	0.0260736	25		0.00520826	0.0262279	35		0.0299179	0.0902172	38
20.2524	0.0143102	0.0236518	25		0.00377886	0.0297991	35		0.0246755	0.0859373	38
20.3022	0.0149703	0.0213733	25		0.0041496	0.0268019	35		0.0250094	0.086069	38
20.3523	0.00885532	0.0246344	25		0.00350037	0.0219007	35		0.0243916	0.0906066	38
20.4022	0.0178722	0.0234349	25		0.00119954	0.0225209	35		0.0277682	0.0856458	38
20.4523	0.0117189	0.0169988	25		0.000681743	0.0204392	35		0.0285787	0.0852724	38
20.5024	0.0199563	0.025313	25		0.00254697	0.0219178	35		0.0288348	0.0838947	38
20.5523	0.01195	0.0226166	25		0.00536331	0.0207845	35		0.0333231	0.0888187	38
20.6023	0.0110441	0.0192201	25		0.0021391	0.018707	35		0.0336173	0.0892961	38
20.6521	0.0115566	0.0164798	25		0.00392991	0.0180206	35		0.0282373	0.0848094	38
20.7024	0.011286	0.0190339	25		0.00306411	0.0172411	35		0.0277392	0.0872524	38
20.7523	0.00660112	0.013522	25		0.000483026	0.0172195	35		0.0319746	0.0566095	38
20.8022	0.00943393	0.0175782	25		0.00232257	0.0189877	35		0.0342689	0.0926174	38
20.8524	0.00850116	0.0160775	25		0.0008356	0.0164703	35		0.0314461	0.0909606	38
20.9024	0.0130016	0.0216429	25		0.00370609	0.019211	35		0.02951	0.0894946	38
20.9524	0.0061426	0.013367	25		0.00591947	0.0157544	35		0.0305718	0.0866152	38

## Sheet: Fig.2G
										Basal ratios
	MMTV-PyMT WT				MMTV-PyMT BK-KO					WT				BK-KO
Time (min)	Average	SD	N (cells)		Average	SD	N (cells)			ctrl	+ PAX	+ IBTX		ctrl	+ PAX	+ IBTX
0	2.2905	0.321824	47		2.58436	0.523806	86			2.43341	2.79502	2.40271		2.10265	2.78335	2.84356
0.050255	2.29257	0.323811	47		2.60548	0.500018	86			1.68578	2.5591	2.47648		2.374	2.54995	2.2888
0.100147	2.28466	0.320132	47		2.59341	0.483001	86			2.07945	2.72285	2.18838		3.06263	2.6112	2.2652
0.150172	2.28686	0.324508	47		2.60354	0.48621	86			1.95526	2.4214	2.18289		2.58673	2.58149	2.41241
0.200135	2.28846	0.318804	47		2.61676	0.516022	86			1.68401	2.70094	2.03804		3.1132	3.24928	2.82312
0.250108	2.28581	0.32157	47		2.60263	0.482767	86			2.47985	2.58977	1.62983		2.2542	2.68713	2.32493
0.3002	2.2844	0.320849	47		2.60854	0.496321	86			1.88451	2.94711	1.78509		2.35418	2.32102	2.5797
0.350177	2.28403	0.327176	47		2.62183	0.529234	86			2.17085	3.03122	2.0443		2.26103	2.45032	2.82522
0.400175	2.27763	0.323921	47		2.60043	0.502689	86			2.31513	2.41801	2.1083		4.35189	2.6149	2.41529
0.450153	2.28388	0.319365	47		2.61589	0.515167	86			2.30608	2.77749	2.37412		2.28803	2.72728	2.42775
0.500118	2.28156	0.321923	47		2.59605	0.477244	86			2.79885	2.529	3.15988		2.88675	2.76674	3.03598
0.55009	2.27912	0.320349	47		2.60098	0.490534	86			2.693	2.4519	3.25712		2.30483	3.34648	2.83144
0.600128	2.27918	0.321391	47		2.60906	0.514988	86			2.62407	3.08422	3.11545		2.32763	2.34514	2.55588
0.650048	2.27741	0.319837	47		2.60921	0.515232	86			3.19358	3.01939	2.86369		2.37956	2.09044	2.59325
0.700172	2.28255	0.321108	47		2.61079	0.513417	86			2.04943	2.60371	2.16135		2.31653	2.42878	2.3143
0.750102	2.28194	0.321811	47		2.60894	0.507933	86			1.94623	2.58447	2.27823		2.47646	2.45756	2.4527
0.800103	2.2827	0.320702	47		2.60975	0.505829	86			2.2181	2.38694	2.30938		2.47261	3.24987	2.67751
0.850155	2.2801	0.322424	47		2.60711	0.503097	86			2.10318	2.23159	2.50632		2.17701	2.54045	2.61611
0.900053	2.27762	0.317669	47		2.61283	0.504265	86			2.44509	2.74462	2.55443		2.82025	2.35098	2.62899
0.95017	2.27451	0.318307	47		2.60083	0.480219	86			2.51504	2.55537	2.25171		2.50434	2.5617	2.62702
1.00015	2.27756	0.31894	47		2.58637	0.470147	86			2.30887	2.33801	2.00142		2.20731	2.62231	2.52798
1.05021	2.27504	0.318865	47		2.6076	0.504955	86			2.70606	2.40308	2.16049		2.43222	2.41729	3.01042
1.10007	2.27602	0.321975	47		2.59664	0.491485	86			2.12512	2.89228	2.10222		2.0451	2.39444	2.94451
1.15016	2.28094	0.322556	47		2.6049	0.509185	86			2.01517	2.79257	2.22337		2.34384	2.90988	2.78977
1.20016	2.2743	0.319245	47		2.6059	0.510412	86			1.95684	3.02638	1.89972		3.52999	3.15848	2.21482
1.25011	2.27758	0.319401	47		2.59667	0.486952	86			1.86575	2.44136	2.56928		3.45993	2.03059	2.49286
1.30008	2.28155	0.318321	47		2.59912	0.494101	86			1.75138	2.32917	2.16872		3.0193	3.20849	2.9873
1.35014	2.27621	0.319675	47		2.60154	0.506208	86			2.03678	2.6901	3.03617		2.5105	2.90135	2.54172
1.40016	2.27418	0.315941	47		2.58258	0.470523	86			2.59499	2.87947	1.86487		2.51811	2.66611	2.97858
1.45009	2.27613	0.31676	47		2.60119	0.498726	86			2.16113	2.29063	2.18459		2.52317	2.93591	3.16469
1.50008	2.27607	0.319411	47		2.59345	0.480991	86			1.90269	3.08649	2.15599		2.20595	2.44012	2.83926
1.55012	2.2699	0.321135	47		2.60293	0.501603	86			2.49719	3.31704	2.3078		2.3081	2.70376	2.38235
1.60017	2.27503	0.323063	47		2.59008	0.482478	86			2.83272	2.7748	2.19745		2.34797	2.89204	3.05069
1.65012	2.27857	0.319851	47		2.59429	0.490628	86			2.72845	2.79446	2.79476		2.06861	2.31814	2.83508
1.70006	2.27461	0.321232	47		2.59471	0.495984	86			2.54919	2.54427	2.27214		2.39922	2.07406	2.42171
1.75013	2.2746	0.322094	47		2.60106	0.498083	86			2.48652	2.68756	2.66364		2.62293	2.59389	2.42287
1.80013	2.27366	0.318785	47		2.61234	0.507948	86			2.33563	2.40002	2.44492		2.20837	2.45472	2.51977
1.85006	2.28221	0.319234	47		2.61857	0.524873	86			2.31639	2.45251	2.31311		2.19115	2.15265	2.64826
1.90011	2.2742	0.320466	47		2.61655	0.524655	86			2.28771	2.51319	2.77534		2.26424	2.26383	3.36397
1.95006	2.28177	0.319941	47		2.62437	0.534001	86			2.34266	2.21524	2.224		2.03946	2.54944	2.78241
2.00015	2.27791	0.322756	47		2.61534	0.528678	86			2.29973	2.86145	2.51041		2.57383	2.70546	2.99487
2.05005	2.27693	0.320318	47		2.60181	0.505914	86			2.36183	2.7247	2.53458		2.15195	2.81469	2.82514
2.10013	2.27845	0.317631	47		2.61875	0.527761	86			2.34775	2.43181	1.75978		2.57392	2.78053	2.4614
2.15023	2.28062	0.318107	47		2.62266	0.550867	86			2.04942	2.7477	3.18711		3.30663	2.29682
2.20021	2.27687	0.317241	47		2.61514	0.51775	86			2.24298	2.53186	2.16589		2.0956	2.61957
2.25015	2.28152	0.317959	47		2.61759	0.521209	86			2.35555	2.86466	2.81188		3.23035	2.5292
2.30008	2.28156	0.314899	47		2.60598	0.507823	86			2.16246		2.7876		2.71807	2.70975
2.35012	2.27666	0.314585	47		2.60152	0.490536	86					2.42162		2.25848	2.80519
2.40012	2.27486	0.321601	47		2.61729	0.523831	86					2.36549		2.4287	2.80396
2.45019	2.27638	0.317163	47		2.61966	0.546525	86					2.33157		2.85092	2.81328
2.50016	2.27632	0.317077	47		2.60249	0.50392	86					2.57542		2.26416	2.91436
2.55019	2.28215	0.316434	47		2.60619	0.507528	86					1.95464		2.95401	2.73277
2.60016	2.28022	0.321926	47		2.61744	0.523436	86					2.20905		2.63624	2.53392
2.6502	2.28053	0.319813	47		2.60494	0.503101	86					2.81465		2.78238	2.99492
2.70012	2.27811	0.317526	47		2.61042	0.511279	86					2.7467		3.36733	2.83312
2.7501	2.27834	0.321622	47		2.60668	0.503851	86					2.1362		2.34624	3.25493
2.80011	2.27827	0.31586	47		2.5977	0.495376	86					2.56666		2.34626	2.84791
2.85013	2.27817	0.315278	47		2.61181	0.513559	86					2.87485		2.09332	2.58289
2.90013	2.27552	0.3155	47		2.61854	0.533462	86					2.66577		2.29472
2.95017	2.2806	0.315841	47		2.60358	0.502984	86							2.77673
3.00007	2.28389	0.31631	47		2.59906	0.504728	86							2.76577
3.05019	2.29119	0.316046	47		2.61436	0.526425	86							1.64806
3.10011	2.28141	0.314716	47		2.61468	0.529042	86							2.71581
3.15017	2.28306	0.317181	47		2.61565	0.543916	86							2.33169
3.20008	2.28207	0.316942	47		2.62726	0.561835	86							2.27167
3.25007	2.28389	0.318434	47		2.60739	0.520814	86							2.42886
3.30008	2.28535	0.314035	47		2.60476	0.514629	86							2.82987
3.35012	2.28778	0.318303	47		2.5952	0.497345	86							2.7912
3.40019	2.29056	0.318262	47		2.60098	0.504243	86							2.52794
3.45007	2.28898	0.31405	47		2.60693	0.5158	86							2.49753
3.50014	2.28477	0.314237	47		2.59518	0.505647	86							2.54156
3.55012	2.28728	0.322188	47		2.5893	0.508476	86							2.58316
3.60005	2.28444	0.319559	47		2.58725	0.497565	86							2.30989
3.65018	2.29001	0.319573	47		2.59301	0.501776	86							2.52196
3.70011	2.2864	0.313667	47		2.59134	0.504463	86							2.61195
3.75011	2.286	0.312951	47		2.58832	0.501743	86							4.96391
3.80011	2.28702	0.313523	47		2.59099	0.500667	86							2.47214
3.85015	2.28685	0.317906	47		2.59829	0.511661	86							2.50819
3.90012	2.2887	0.316902	47		2.58643	0.4953	86							2.86013
3.95013	2.28708	0.318905	47		2.58781	0.504861	86							3.38899
4.00014	2.28323	0.316555	47		2.58956	0.502593	86							2.54317
4.05007	2.28273	0.315946	47		2.5894	0.505959	86							3.88578
4.10011	2.28393	0.314862	47		2.5942	0.510641	86							2.32473
4.1501	2.28256	0.318589	47		2.59096	0.507037	86							3.30053
4.20007	2.28477	0.318887	47		2.58219	0.488974	86							2.64715
4.25021	2.28603	0.318808	47		2.5791	0.497871	86							2.68848
4.30006	2.28158	0.315898	47		2.57798	0.474705	86
4.35012	2.28315	0.316126	47		2.57982	0.485514	86
4.40013	2.27853	0.317815	47		2.58261	0.491329	86
4.45019	2.27854	0.316161	47		2.58069	0.480853	86
4.50013	2.27879	0.313234	47		2.59244	0.50714	86
4.55007	2.27921	0.315179	47		2.58548	0.494525	86
4.6002	2.28336	0.31698	47		2.58229	0.492063	86
4.65017	2.27708	0.314749	47		2.58253	0.489231	86
4.70016	2.28302	0.312562	47		2.58768	0.5016	86
4.75021	2.27979	0.314385	47		2.59417	0.514198	86
4.80011	2.27784	0.31479	47		2.59071	0.507654	86
4.85014	2.27548	0.310968	47		2.57796	0.48026	86
4.90016	2.27862	0.311328	47		2.58171	0.488538	86
4.95011	2.27552	0.306866	47		2.57345	0.481639	86
5.00014	2.27388	0.311792	47		2.5823	0.503443	86
5.05016	2.27848	0.312269	47		2.58268	0.496373	86
5.10008	2.28154	0.314754	47		2.57431	0.480735	86
5.15019	2.27502	0.316361	47		2.5804	0.492346	86
5.20013	2.27468	0.314516	47		2.58177	0.501828	86
5.2501	2.2762	0.316126	47		2.5783	0.488808	86
5.30011	2.27672	0.311807	47		2.58212	0.490673	86
5.35009	2.30137	0.336375	47		2.59049	0.5147	86
5.40008	2.30632	0.359414	47		2.66713	0.532133	86
5.45019	2.35275	0.401479	47		2.74009	0.575763	86
5.50022	2.43985	0.48971	47		2.8052	0.601338	86
5.55007	2.52665	0.596105	47		2.88193	0.636579	86
5.60022	2.56085	0.639151	47		2.9543	0.653985	86
5.65019	2.62656	0.657355	47		3.02777	0.696972	86
5.70016	2.75723	0.688303	47		3.07898	0.717787	86
5.75007	2.81799	0.724246	47		3.12667	0.729186	86
5.80013	2.85223	0.737046	47		3.1573	0.720366	86
5.85015	2.88347	0.745783	47		3.17052	0.737022	86
5.90014	2.88601	0.751727	47		3.16168	0.741678	86
5.95008	2.89602	0.749291	47		3.15449	0.757599	86
6.0001	2.91954	0.726208	47		3.13969	0.74999	86
6.05016	2.93173	0.709568	47		3.1502	0.727879	86
6.10018	2.956	0.715752	47		3.15608	0.744508	86
6.15005	2.97519	0.702888	47		3.14898	0.723613	86
6.2002	2.98919	0.695136	47		3.14596	0.723814	86
6.25016	2.97561	0.69335	47		3.13962	0.728325	86
6.3002	2.94473	0.67765	47		3.15149	0.756477	86
6.35018	2.92077	0.663875	47		3.10129	0.724901	86
6.40017	2.89325	0.656187	47		3.11946	0.756531	86
6.45007	2.86258	0.632767	47		3.08492	0.721937	86
6.50012	2.85474	0.634871	47		3.069	0.719264	86
6.55008	2.85806	0.629058	47		3.06256	0.725263	86
6.60013	2.83972	0.624539	47		3.06235	0.723264	86
6.6502	2.8222	0.61618	47		3.01929	0.691079	86
6.70009	2.80307	0.608794	47		3.01065	0.6979	86
6.7501	2.78866	0.601336	47		2.99756	0.693871	86
6.8001	2.78786	0.59406	47		2.97409	0.672821	86
6.8502	2.78512	0.597173	47		2.97532	0.681214	86
6.90011	2.77301	0.590353	47		2.96808	0.667478	86
6.95016	2.75952	0.582124	47		2.95394	0.656788	86
7.00019	2.74732	0.571521	47		2.9415	0.65082	86
7.05016	2.73571	0.564014	47		2.94745	0.659135	86
7.10015	2.73625	0.566079	47		2.94535	0.668109	86
7.15016	2.7201	0.56659	47		2.9379	0.668179	86
7.20006	2.7089	0.568975	47		2.90664	0.638442	86
7.25011	2.69147	0.549868	47		2.90187	0.640334	86
7.30013	2.68371	0.556954	47		2.89661	0.639588	86
7.35007	2.67036	0.547042	47		2.89582	0.63808	86
7.40008	2.67525	0.530291	47		2.89251	0.633514	86
7.45009	2.66441	0.534412	47		2.89958	0.656313	86
7.50016	2.65401	0.522968	47		2.91609	0.725964	86
7.55011	2.63749	0.520521	47		2.91009	0.719548	86
7.60013	2.62793	0.494168	47		2.91464	0.729676	86
7.65018	2.61965	0.484358	47		2.89789	0.706566	86
7.70016	2.61107	0.473964	47		2.88193	0.689064	86
7.75013	2.59231	0.465842	47		2.87789	0.676275	86
7.80006	2.58863	0.453677	47		2.88809	0.691409	86
7.8501	2.58417	0.454183	47		2.87206	0.681852	86
7.90015	2.57462	0.447106	47		2.87934	0.672178	86
7.95007	2.56925	0.444217	47		2.85849	0.656856	86
8.00015	2.56369	0.446397	47		2.85149	0.689243	84
8.05008	2.56113	0.451597	47		2.828	0.596193	86
8.10021	2.55072	0.438731	47		2.84365	0.635355	86
8.15005	2.54866	0.438436	47		2.83613	0.633066	86
8.20017	2.54514	0.431898	47		2.84418	0.641222	86
8.25008	2.54155	0.430876	47		2.84511	0.644242	86
8.30022	2.54199	0.43752	47		2.82585	0.623948	86
8.35005	2.53907	0.426572	47		2.83213	0.633176	86
8.40014	2.53439	0.423956	47		2.83481	0.63976	86
8.45018	2.53195	0.432091	47		2.81018	0.611204	86
8.50006	2.53746	0.433105	47		2.82304	0.630864	86
8.55011	2.53653	0.434959	47		2.81743	0.61513	86
8.60007	2.53256	0.428092	47		2.81587	0.621382	86
8.65009	2.53692	0.432614	47		2.80511	0.60316	86
8.70012	2.53579	0.423725	47		2.80986	0.609359	86
8.75021	2.53204	0.435174	47		2.80708	0.611565	86
8.80018	2.53948	0.430795	47		2.7963	0.597857	86
8.85009	2.53491	0.427544	47		2.80961	0.618991	86
8.90019	2.53698	0.429548	47		2.81118	0.6252	86
8.95017	2.53073	0.4174	47		2.80569	0.617162	86
9.00007	2.53681	0.429257	47		2.79733	0.600724	86
9.0501	2.52684	0.427406	47		2.79633	0.611913	86
9.10009	2.53205	0.425059	47		2.7924	0.595312	86
9.15012	2.53212	0.418072	47		2.80049	0.61064	86
9.20018	2.51753	0.416425	47		2.78281	0.588605	86
9.25011	2.53509	0.430261	47		2.79663	0.608213	86
9.30016	2.53615	0.430341	47		2.78899	0.597528	86
9.35011	2.53886	0.434373	47		2.79047	0.615395	86
9.40006	2.53717	0.43421	47		2.79027	0.603872	86
9.45016	2.55271	0.445984	47		2.78496	0.600577	86
9.50009	2.55745	0.454876	47		2.78798	0.608656	86
9.55017	2.55371	0.454771	47		2.77569	0.58821	86
9.6002	2.56204	0.469441	47		2.77568	0.592054	86
9.65006	2.5625	0.470767	47		2.77824	0.598763	86
9.70013	2.56193	0.483607	47		2.78076	0.593288	86
9.75017	2.55586	0.486383	47		2.76952	0.586851	86
9.80016	2.54786	0.473732	47		2.78575	0.609661	86
9.85016	2.54494	0.468598	47		2.77979	0.606864	86
9.90007	2.55054	0.473855	47		2.76678	0.584898	86
9.95008	2.54556	0.468068	47		2.77301	0.589468	86
10.0001	2.54089	0.470602	47		2.749	0.55447	86
10.0501	2.54021	0.471394	47		2.7734	0.578847	86
10.1002	2.5433	0.466684	47		2.78306	0.595135	86
10.1502	2.53262	0.466305	47		2.79337	0.606918	86
10.2002	2.52716	0.466387	47		2.78038	0.593314	86
10.2501	2.53103	0.468358	47		2.78223	0.601995	86
10.3002	2.53767	0.477548	47		2.76665	0.579198	86
10.3501	2.5323	0.465328	47		2.75989	0.581937	86
10.4001	2.53021	0.465535	47		2.7666	0.589357	86
10.4502	2.52687	0.465042	47		2.77083	0.596041	86
10.5001	2.53221	0.465035	47		2.75549	0.583697	86
10.5502	2.52178	0.449277	47		2.7508	0.585432	86
10.6001	2.51949	0.443805	47		2.7368	0.573474	86
10.6502	2.51763	0.444956	47		2.72797	0.571855	86
10.7001	2.49922	0.416509	47		2.70864	0.546429	86
10.7501	2.49252	0.409012	47		2.72263	0.57734	86
10.8001	2.48758	0.403755	47		2.72277	0.575332	86
10.8502	2.47268	0.38189	47		2.72874	0.594513	86
10.9001	2.46952	0.383394	47		2.71825	0.577461	86
10.9501	2.45953	0.373172	47		2.71937	0.577749	86
11.0001	2.45736	0.365127	47		2.71608	0.569624	86
11.0501	2.44513	0.363729	47		2.71381	0.573041	86
11.1	2.44363	0.36427	47		2.70205	0.560353	86
11.1501	2.43039	0.354824	47		2.71497	0.573424	86
11.2002	2.43176	0.361853	47		2.70231	0.560563	86
11.2502	2.42442	0.355329	47		2.71298	0.572044	86
11.3001	2.41739	0.356521	47		2.71096	0.575868	86
11.3501	2.41556	0.358473	47		2.70617	0.565322	86
11.4001	2.41104	0.353941	47		2.72072	0.609896	86
11.4501	2.41197	0.352686	47		2.73006	0.627926	86
11.5002	2.40372	0.357391	47		2.72573	0.59808	86
11.5501	2.40278	0.358211	47		2.70951	0.570972	86
11.6001	2.40312	0.350726	47		2.70556	0.56617	86
11.6502	2.40613	0.347776	47		2.70046	0.564859	86
11.7001	2.40081	0.352319	47		2.70526	0.56606	86
11.7502	2.39757	0.35268	47		2.70375	0.559414	86
11.8001	2.3982	0.350184	47		2.70355	0.56357	86
11.8502	2.39838	0.351794	47		2.70058	0.571135	86
11.9001	2.40285	0.353621	47		2.68812	0.552863	86
11.9502	2.39465	0.347282	47		2.68553	0.542561	86
12.0001	2.39865	0.348305	47		2.69632	0.558621	86
12.0502	2.39978	0.354164	47		2.70281	0.56987	86
12.1002	2.39867	0.352086	47		2.69794	0.575011	86
12.1502	2.41466	0.37647	47		2.70125	0.572931	86
12.2002	2.44311	0.456056	47		2.69186	0.565921	86
12.2501	2.44752	0.474603	47		2.70606	0.589653	86
12.3002	2.44738	0.475976	47		2.7118	0.617065	86
12.3502	2.44249	0.470221	47		2.70387	0.604816	86
12.4002	2.44585	0.466584	47		2.68875	0.572317	86
12.4501	2.44402	0.465549	47		2.68108	0.56729	86
12.5001	2.44002	0.466853	47		2.67107	0.547917	86
12.5501	2.4402	0.462497	47		2.68127	0.55345	86
12.6002	2.44048	0.454464	47		2.67966	0.554313	86
12.6502	2.43674	0.449204	47		2.67904	0.556003	86
12.7002	2.43611	0.440583	47		2.68267	0.568394	86
12.7502	2.43038	0.43266	47		2.67971	0.555342	86
12.8001	2.43308	0.422866	47		2.67895	0.552907	86
12.8502	2.42859	0.412642	47		2.68362	0.561201	86
12.9002	2.42574	0.405695	47		2.69926	0.57161	86
12.9502	2.42334	0.39141	47		2.71174	0.589934	86
13.0001	2.42334	0.393622	47		2.70054	0.578196	86
13.0501	2.42114	0.382255	47		2.70551	0.572722	86
13.1002	2.41756	0.370205	47		2.70652	0.575104	86
13.1501	2.41601	0.374553	47		2.69994	0.557164	86
13.2001	2.40997	0.366532	47		2.69878	0.565002	86
13.2501	2.4091	0.372504	47		2.71778	0.583334	86
13.3001	2.40433	0.359428	47		2.72302	0.60346	86
13.3502	2.4084	0.358819	47		2.71972	0.599888	86
13.4001	2.40621	0.361909	47		2.72883	0.601846	86
13.4502	2.40187	0.359405	47		2.71803	0.593703	86
13.5002	2.40866	0.361617	47		2.71233	0.582592	86
13.5501	2.40836	0.355284	47		2.71321	0.588142	86
13.6002	2.399	0.35735	47		2.71784	0.587557	86
13.6502	2.39623	0.36554	47		2.72286	0.597131	86
13.7001	2.40166	0.354721	47		2.7046	0.565403	86
13.7502	2.40386	0.354245	47		2.70448	0.573454	86
13.8001	2.40235	0.361265	47		2.72744	0.598892	86
13.8501	2.39817	0.357058	47		2.72203	0.620939	86
13.9002	2.40284	0.356181	47		2.72815	0.631672	86
13.9502	2.40092	0.356877	47		2.73612	0.634753	86
14.0001	2.39305	0.352937	47		2.71502	0.611072	86
14.0501	2.39717	0.355276	47		2.72935	0.629739	86
14.1002	2.39895	0.359788	47		2.72244	0.620402	86
14.1502	2.39203	0.356911	47		2.71798	0.618218	86
14.2001	2.3995	0.357685	47		2.72575	0.632295	86
14.2502	2.39438	0.361737	47		2.72676	0.638876	86
14.3001	2.3923	0.350815	47		2.7302	0.632896	86
14.3501	2.39553	0.356304	47		2.71803	0.620192	86
14.4001	2.39268	0.351398	47		2.71682	0.623478	86
14.4501	2.39804	0.356626	47		2.71381	0.619317	86
14.5001	2.3895	0.349463	47		2.71903	0.621443	86
14.5501	2.38996	0.358127	47		2.71622	0.619073	86
14.6001	2.39066	0.357852	47		2.73161	0.641412	86
14.6502	2.38729	0.351693	47		2.72841	0.64676	86
14.7001	2.38815	0.359029	47		2.71561	0.626056	86
14.7502	2.38853	0.354214	47		2.72441	0.623035	86
14.8002	2.38495	0.349414	47		2.71608	0.60957	86
14.8501	2.37947	0.353582	47		2.70808	0.597777	86
14.9001	2.38284	0.356545	47		2.68944	0.566017	86

## Sheet: Fig.2H
														Basal ratios
	MDA-MB-453 ctrl				MDA-MB-453 + PAX				MDA-MB-453 + IBTX					MDA-MB-453
Time (min)	Average	SD	N (cells)		Average	SD	N (cells)		Average	SD	N (cells)			ctrl	+ PAX	+ IBTX
0	1.76033	0.378767	33		2.34123	0.710197	28		1.66819	0.146563	22			2.09095	1.56071	1.42252
0.0502567	1.75591	0.377077	33		2.33267	0.696699	28		1.66819	0.142822	22			2.09869	2.04225	1.66396
0.102047	1.75217	0.378221	33		2.33311	0.692448	28		1.66364	0.143009	22			2.10534	1.94527	1.54197
0.150212	1.75222	0.371516	33		2.33954	0.688492	28		1.65737	0.146496	22			1.87113	2.43985	1.52613
0.200202	1.75314	0.375037	33		2.33638	0.677579	28		1.65181	0.147694	22			1.88932	2.09172	1.63379
0.250188	1.74828	0.372584	33		2.34633	0.678505	28		1.65373	0.148113	22			1.44519	2.98182	1.66336
0.300177	1.74737	0.372488	33		2.35425	0.682532	28		1.66171	0.145083	22			2.12167	2.30398	1.94909
0.350165	1.75096	0.378963	33		2.3444	0.683929	28		1.65745	0.144623	22			2.02671	2.95963	1.72275
0.400153	1.75481	0.378869	33		2.35564	0.686751	28		1.66039	0.144212	22			1.80104	3.1427	1.45641
0.450142	1.74955	0.376735	33		2.36149	0.687395	28		1.65937	0.144095	22			1.93615	3.39101	1.64225
0.50013	1.74726	0.372694	33		2.35512	0.681793	28		1.65547	0.143552	22			2.10534	2.22308	1.80511
0.550118	1.74804	0.377064	33		2.35052	0.681006	28		1.6577	0.144799	22			1.9093	3.81442	2.04807
0.600107	1.75117	0.379039	33		2.34766	0.674915	28		1.65399	0.144536	22			1.92052	3.84771	1.64357
0.650095	1.74922	0.375032	33		2.355	0.68558	28		1.65866	0.142741	22			1.79171	2.33481	1.51553
0.700083	1.75097	0.376404	33		2.35125	0.687088	28		1.66455	0.139714	22			1.35138	2.20354	1.63905
0.750072	1.7521	0.372995	33		2.35643	0.684229	28		1.65469	0.14467	22			1.60143	3.11258	1.63322
0.80006	1.75182	0.375233	33		2.35532	0.674556	28		1.65476	0.146481	22			1.49509	2.341	1.70806
0.850048	1.75173	0.375097	33		2.34909	0.681041	28		1.65563	0.143276	22			1.41177	2.80776	1.76594
0.900037	1.75008	0.374963	33		2.35319	0.681101	28		1.66136	0.146196	22			2.18787	2.82967	1.69042
0.950023	1.75225	0.376126	33		2.35449	0.685954	28		1.65129	0.147059	22			1.58615	1.81062	1.75056
1.00002	1.75012	0.377846	33		2.35563	0.682629	28		1.65879	0.140909	22			1.42744	2.27792	1.52482
1.05026	1.75015	0.371512	33		2.35363	0.685396	28		1.661	0.146853	22			2.03908	1.78739	1.56526
1.10025	1.74965	0.377448	33		2.35231	0.68125	28		1.66055	0.146117	22			1.61787	1.55792
1.15024	1.75283	0.372486	33		2.35065	0.683077	28		1.65687	0.147943	22			1.46866	1.54078
1.20023	1.75038	0.378591	33		2.34864	0.677843	28		1.66025	0.147796	22			1.8806	1.56687
1.25022	1.74948	0.375402	33		2.35376	0.678777	28		1.66097	0.146538	22			2.32673	1.49884
1.3002	1.7491	0.376431	33		2.34815	0.681755	28		1.6579	0.145117	22			1.98462	1.57163
1.35019	1.75577	0.375957	33		2.34883	0.674524	28		1.66488	0.146527	22			2.27627	1.78687
1.40018	1.75378	0.381559	33		2.34351	0.678918	28		1.65068	0.147536	22			1.76997
1.45017	1.75716	0.378747	33		2.34513	0.67854	28		1.66123	0.145292	22			1.697
1.50016	1.75695	0.379661	33		2.34904	0.685087	28		1.65347	0.148702	22			1.22849
1.55015	1.75234	0.377948	33		2.34183	0.682676	28		1.65457	0.146876	22			0.841791
1.60013	1.75138	0.383854	33		2.34539	0.683373	28		1.66378	0.144056	22			0.671863
1.65012	1.75438	0.373305	33		2.35128	0.685638	28		1.661	0.143286	22
1.70011	1.74721	0.371562	33		2.35567	0.68303	28		1.65422	0.145876	22
1.7501	1.7586	0.379101	33		2.34314	0.688164	28		1.65703	0.144946	22
1.80009	1.7543	0.373904	33		2.348	0.684086	28		1.66644	0.144431	22
1.85007	1.75327	0.376114	33		2.34617	0.685073	28		1.65771	0.146777	22
1.90006	1.75808	0.372349	33		2.3429	0.689554	28		1.66009	0.147216	22
1.95005	1.75503	0.377823	33		2.34172	0.690574	28		1.65791	0.145835	22
2.00004	1.75499	0.375511	33		2.34586	0.685739	28		1.66014	0.148794	22
2.05003	1.75643	0.376302	33		2.34822	0.684638	28		1.66825	0.141775	22
2.10001	1.75705	0.375406	33		2.34825	0.687373	28		1.66704	0.142498	22
2.15001	1.75572	0.375793	33		2.35148	0.682961	28		1.6616	0.144761	22
2.20025	1.75815	0.378607	33		2.3457	0.684899	28		1.66206	0.145101	22
2.25024	1.75711	0.3772	33		2.34587	0.681021	28		1.66388	0.144805	22
2.30023	1.76114	0.378352	33		2.34642	0.680885	28		1.666	0.147576	22
2.35022	1.75656	0.376826	33		2.34975	0.683419	28		1.65913	0.147906	22
2.40021	1.76203	0.381644	33		2.35308	0.683191	28		1.65687	0.147197	22
2.45019	1.76045	0.379821	33		2.34541	0.687637	28		1.66245	0.14654	22
2.50018	1.75902	0.378635	33		2.34875	0.684415	28		1.66313	0.144694	22
2.55017	1.76457	0.385029	33		2.35761	0.683726	28		1.6545	0.145691	22
2.60009	1.75752	0.378131	33		2.35539	0.685959	28		1.6562	0.146473	22
2.65007	1.76275	0.377527	33		2.3517	0.683947	28		1.6641	0.14524	22
2.70006	1.76421	0.382871	33		2.3514	0.68133	28		1.65931	0.146512	22
2.75005	1.76209	0.380043	33		2.3519	0.683435	28		1.65852	0.139074	22
2.80004	1.76396	0.379915	33		2.34969	0.683718	28		1.65984	0.146553	22
2.85003	1.75982	0.380359	33		2.3468	0.688576	28		1.65917	0.144209	22
2.90001	1.75897	0.375758	33		2.35146	0.68907	28		1.66317	0.146232	22
2.95026	1.7591	0.377992	33		2.35517	0.677089	28		1.6575	0.147358	22
3.00025	1.7619	0.380982	33		2.34804	0.684934	28		1.65977	0.14415	22
3.05024	1.75755	0.377632	33		2.35305	0.682449	28		1.66341	0.147693	22
3.10023	1.76122	0.380815	33		2.35045	0.682656	28		1.65792	0.147465	22
3.15022	1.75736	0.377531	33		2.35044	0.682681	28		1.66496	0.145991	22
3.2002	1.76117	0.378847	33		2.35284	0.676845	28		1.65661	0.146028	22
3.25019	1.75693	0.376884	33		2.35349	0.685595	28		1.66024	0.142028	22
3.30018	1.75803	0.380417	33		2.34461	0.677371	28		1.66283	0.145591	22
3.35017	1.75877	0.377775	33		2.35329	0.681567	28		1.65508	0.146201	22
3.40016	1.76176	0.385334	33		2.34971	0.681174	28		1.66224	0.143246	22
3.45015	1.76385	0.383275	33		2.3459	0.685077	28		1.65943	0.144074	22
3.50013	1.75544	0.381423	33		2.35196	0.681656	28		1.66519	0.144929	22
3.55012	1.7629	0.383486	33		2.34932	0.685941	28		1.65994	0.143416	22
3.60011	1.7627	0.388931	33		2.34648	0.679915	28		1.66101	0.144292	22
3.6501	1.7629	0.384226	33		2.34511	0.679939	28		1.65726	0.142668	22
3.70009	1.76399	0.387583	33		2.34684	0.674638	28		1.65854	0.141373	22
3.75007	1.76508	0.385892	33		2.35063	0.683986	28		1.66209	0.147874	22
3.80006	1.76333	0.38327	33		2.35355	0.683536	28		1.66074	0.145291	22
3.85005	1.76217	0.383445	33		2.34605	0.681434	28		1.65908	0.148792	22
3.90004	1.76158	0.389639	33		2.35164	0.682726	28		1.66196	0.14623	22
3.95003	1.76186	0.386194	33		2.34581	0.683346	28		1.65333	0.146561	22
4.00002	1.75963	0.381786	33		2.35357	0.682532	28		1.65642	0.143397	22
4.05	1.7611	0.38458	33		2.3464	0.679787	28		1.6644	0.143402	22
4.10025	1.76338	0.388333	33		2.3502	0.682292	28		1.66206	0.143577	22
4.15024	1.75998	0.382467	33		2.34231	0.683068	28		1.65935	0.144006	22
4.20023	1.764	0.384687	33		2.35264	0.68077	28		1.66143	0.145886	22
4.25022	1.75901	0.38189	33		2.34944	0.681201	28		1.64965	0.150112	22
4.30021	1.76	0.383731	33		2.3538	0.683423	28		1.65676	0.148541	22
4.3502	1.75618	0.377974	33		2.35008	0.685604	28		1.65778	0.147875	22
4.40018	1.75771	0.382364	33		2.34764	0.678415	28		1.65578	0.148252	22
4.45017	1.75626	0.384411	33		2.34313	0.683625	28		1.65922	0.144997	22
4.50016	1.7636	0.382351	33		2.34598	0.679383	28		1.66226	0.144543	22
4.55015	1.76076	0.379853	33		2.34195	0.678657	28		1.66409	0.146066	22
4.60014	1.76099	0.376978	33		2.345	0.679557	28		1.66415	0.144772	22
4.65013	1.76359	0.38511	33		2.34444	0.679718	28		1.66085	0.145235	22
4.70011	1.75817	0.379882	33		2.35049	0.680745	28		1.65887	0.147774	22
4.7501	1.75952	0.379811	33		2.3484	0.677448	28		1.66238	0.147298	22
4.80009	1.75534	0.378434	33		2.34806	0.684614	28		1.66164	0.146934	22
4.85008	1.75619	0.381146	33		2.35281	0.677857	28		1.65767	0.145519	22
4.90007	1.75587	0.38229	33		2.35576	0.68095	28		1.65584	0.146122	22
4.95006	1.7556	0.380997	33		2.35157	0.677767	28		1.65846	0.143744	22
5.00004	1.75687	0.377184	33		2.34704	0.672226	28		1.66481	0.140963	22
5.05003	1.75598	0.378139	33		2.34945	0.682519	28		1.65764	0.144039	22
5.10002	1.75566	0.377611	33		2.35048	0.681365	28		1.65623	0.147029	22
5.15001	1.7577	0.374735	33		2.35161	0.685196	28		1.65762	0.147906	22
5.20026	1.7533	0.375623	33		2.35322	0.678334	28		1.6602	0.144938	22
5.25024	1.75439	0.380174	33		2.35524	0.685291	28		1.64972	0.149309	22
5.30023	1.75072	0.370745	33		2.3547	0.677869	28		1.66376	0.144783	22
5.35022	1.75175	0.378951	33		2.3584	0.680403	28		1.66153	0.144635	22
5.40021	1.7571	0.3788	33		2.35685	0.682822	28		1.66081	0.146666	22
5.4502	1.74972	0.37506	33		2.3619	0.690276	28		1.65891	0.143702	22
5.50019	1.74964	0.371742	33		2.36359	0.687825	28		1.69034	0.160188	22
5.55018	1.7462	0.373628	33		2.35694	0.684819	28		1.72031	0.195426	22
5.60016	1.74641	0.364799	33		2.3623	0.684947	28		1.77015	0.187869	22
5.65015	1.75558	0.366699	33		2.40205	0.658588	28		1.78916	0.194036	22
5.70014	1.76399	0.359198	33		2.42325	0.648307	28		1.80541	0.191653	22
5.75013	1.76646	0.349305	33		2.43303	0.640175	28		1.82259	0.195245	22
5.80012	1.78225	0.33655	33		2.44344	0.634596	28		1.81428	0.196445	22
5.85011	1.79587	0.328322	33		2.45133	0.636204	28		1.82578	0.197405	22
5.90009	1.80145	0.311594	33		2.4663	0.634025	28		1.8249	0.202634	22
5.95008	1.81024	0.312026	33		2.47497	0.629179	28		1.84858	0.190497	22
6.00007	1.81887	0.302126	33		2.47528	0.630718	28		1.84948	0.195533	22
6.05006	1.82325	0.298297	33		2.48093	0.623181	28		1.85302	0.191754	22
6.10005	1.83441	0.295184	33		2.48416	0.618417	28		1.86509	0.195377	22
6.15003	1.8356	0.293522	33		2.49045	0.617179	28		1.88147	0.174657	22
6.20002	1.84314	0.301275	33		2.50273	0.622206	28		1.89872	0.177249	22
6.25001	1.84766	0.303278	33		2.49474	0.614661	28		1.91311	0.189098	22
6.30026	1.85185	0.301216	33		2.50687	0.61192	28		1.94451	0.203284	22
6.35025	1.88314	0.328753	33		2.5172	0.608656	28		1.94979	0.2086	22
6.40024	1.89791	0.375052	33		2.52556	0.611376	28		1.97089	0.236099	22
6.45022	1.90134	0.382369	33		2.52412	0.607702	28		1.97973	0.248418	22
6.50021	1.90578	0.385144	33		2.52496	0.609865	28		1.99228	0.269866	22
6.5502	1.89763	0.380243	33		2.52803	0.610635	28		1.99274	0.273581	22
6.60019	1.90437	0.392438	33		2.52274	0.608153	28		1.99302	0.284359	22
6.65018	1.90913	0.394378	33		2.52801	0.611081	28		1.99939	0.296829	22
6.70017	1.90898	0.392595	33		2.5329	0.607641	28		1.99014	0.294088	22
6.75016	1.90915	0.389369	33		2.52582	0.606818	28		2.01034	0.318636	22
6.80014	1.9124	0.389621	33		2.5305	0.611045	28		2.00722	0.311585	22
6.85013	1.91041	0.39493	33		2.52252	0.605342	28		2.01068	0.315627	22
6.90012	1.91149	0.395965	33		2.52344	0.60397	28		2.00353	0.310028	22
6.95011	1.90877	0.395321	33		2.51971	0.609873	28		1.99017	0.305975	22
7.0001	1.91012	0.39729	33		2.52128	0.606667	28		1.9837	0.306271	22
7.05009	1.90623	0.388611	33		2.52072	0.610956	28		1.98914	0.300701	22
7.10007	1.90657	0.399672	33		2.51857	0.607028	28		1.97438	0.295576	22
7.15006	1.90768	0.391878	33		2.53305	0.613428	28		1.98403	0.303019	22
7.20005	1.90437	0.390486	33		2.52011	0.608875	28		1.97186	0.297186	22
7.25004	1.90508	0.393362	33		2.51418	0.614235	28		1.96753	0.293359	22
7.30002	1.9111	0.389397	33		2.5124	0.608958	28		1.96611	0.295627	22
7.35001	1.92092	0.395648	33		2.51838	0.612219	28		1.95464	0.282684	22
7.4	1.92984	0.409021	33		2.51271	0.615993	28		1.95679	0.284505	22
7.45025	1.92836	0.410471	33		2.51245	0.61582	28		1.95021	0.267955	22
7.50024	1.9266	0.412157	33		2.50592	0.612786	28		1.9523	0.274759	22
7.55023	1.93029	0.409325	33		2.50758	0.610492	28		1.95069	0.280054	22
7.60022	1.93063	0.418432	33		2.49976	0.61293	28		1.9401	0.273442	22
7.6502	1.9303	0.411965	33		2.50588	0.619657	28		1.93157	0.256895	22
7.70019	1.93009	0.423595	33		2.49493	0.609034	28		1.92361	0.252138	22
7.75018	1.93084	0.415979	33		2.50007	0.618137	28		1.92719	0.252716	22
7.80017	1.92285	0.417004	33		2.49812	0.611431	28		1.91956	0.243528	22
7.85016	1.92909	0.421199	33		2.49662	0.609749	28		1.92597	0.24663	22
7.90015	1.93056	0.421965	33		2.49655	0.618918	28		1.9073	0.238791	22
7.95013	1.92643	0.42421	33		2.49067	0.61313	28		1.91285	0.237272	22
8.00012	1.92719	0.424489	33		2.49043	0.613247	28		1.90957	0.232479	22
8.05011	1.92747	0.434733	33		2.48798	0.612239	28		1.90228	0.227783	22
8.1001	1.92295	0.426234	33		2.48441	0.61091	28		1.90709	0.222451	22
8.15009	1.92536	0.43188	33		2.48361	0.616575	28		1.90269	0.224411	22
8.20008	1.92942	0.435638	33		2.48579	0.614346	28		1.90098	0.225622	22
8.25006	1.9373	0.431207	33		2.48527	0.622281	28		1.89688	0.220252	22
8.30005	1.95664	0.448939	33		2.48143	0.61405	28		1.89548	0.216622	22
8.35004	1.95846	0.456346	33		2.47685	0.613482	28		1.89594	0.214326	22
8.40003	1.95694	0.459732	33		2.47872	0.614604	28		1.88925	0.208579	22
8.45002	1.95864	0.460931	33		2.46722	0.614466	28		1.89515	0.212667	22
8.5	1.95018	0.4615	33		2.47523	0.61912	28		1.89212	0.210433	22
8.55025	1.95578	0.456215	33		2.47345	0.619088	28		1.88276	0.201816	22
8.60024	1.9585	0.471437	33		2.4714	0.611936	28		1.88391	0.196034	22
8.65023	1.95397	0.461394	33		2.47293	0.618087	28		1.88273	0.205202	22
8.70022	1.95815	0.46407	33		2.47092	0.61545	28		1.88721	0.203634	22
8.75021	1.94824	0.469452	33		2.46584	0.615254	28		1.88699	0.203365	22
8.8002	1.95047	0.468954	33		2.47002	0.616882	28		1.87332	0.198284	22
8.85018	1.95469	0.472139	33		2.46511	0.615526	28		1.87717	0.192021	22
8.90017	1.95025	0.466636	33		2.46914	0.615713	28		1.88188	0.190921	22
8.95016	1.95901	0.463845	33		2.46227	0.621362	28		1.88038	0.185845	22
9.00015	1.95085	0.467823	33		2.46706	0.618309	28		1.8708	0.185257	22
9.05014	1.95608	0.468947	33		2.45671	0.620507	28		1.87192	0.187164	22
9.10013	1.9487	0.469738	33		2.46076	0.623791	28		1.86648	0.189711	22
9.15011	1.95058	0.470208	33		2.45693	0.614909	28		1.87319	0.181506	22
9.2001	1.95286	0.468878	33		2.45595	0.62009	28		1.86603	0.182321	22
9.25009	1.94971	0.467064	33		2.45806	0.619683	28		1.8734	0.188033	22
9.30008	1.95046	0.470554	33		2.45897	0.616758	28		1.86837	0.181136	22
9.35007	1.9482	0.472825	33		2.45547	0.613518	28		1.87532	0.187681	22
9.40006	1.94475	0.471114	33		2.45301	0.617511	28		1.866	0.18423	22
9.45004	1.9472	0.471012	33		2.45672	0.619087	28		1.87389	0.185552	22
9.50003	1.94789	0.47315	33		2.45516	0.616257	28		1.86891	0.190238	22
9.55002	1.94735	0.481795	33		2.44983	0.613854	28		1.86605	0.181405	22
9.60001	1.94535	0.476046	33		2.44764	0.618515	28		1.86415	0.188088	22
9.65026	1.93863	0.473595	33		2.44619	0.623032	28		1.86269	0.182352	22
9.70025	1.94146	0.476543	33		2.45595	0.620192	28		1.86552	0.178965	22
9.75023	1.93869	0.474932	33		2.44964	0.625042	28		1.86741	0.184686	22
9.80022	1.93746	0.464078	33		2.44208	0.617386	28		1.86475	0.17942	22
9.85021	1.94245	0.470236	33		2.44168	0.615777	28		1.86692	0.184519	22
9.9002	1.94309	0.469839	33		2.43821	0.61753	28		1.86357	0.182071	22
9.95019	1.93785	0.479984	33		2.43836	0.614711	28		1.85765	0.173985	22
10.0002	1.93238	0.47111	33		2.44503	0.625813	28		1.85382	0.179416	22
10.0502	1.93466	0.466396	33		2.43995	0.619989	28		1.86862	0.186804	22
10.1002	1.9406	0.468629	33		2.44376	0.618111	28		1.85631	0.182227	22
10.1501	1.93635	0.472044	33		2.43669	0.61692	28		1.85762	0.182304	22
10.2001	1.93815	0.46994	33		2.43957	0.622433	28		1.8557	0.179889	22
10.2501	1.94002	0.470963	33		2.43751	0.617273	28		1.85309	0.179929	22
10.3001	1.93988	0.470846	33		2.43958	0.621195	28		1.852	0.175855	22
10.3501	1.93304	0.473719	33		2.42869	0.618629	28		1.85367	0.175712	22
10.4001	1.93281	0.476937	33		2.43849	0.617601	28		1.84459	0.175908	22
10.4501	1.93351	0.469356	33		2.43036	0.620372	28		1.85042	0.177456	22
10.5001	1.93459	0.472226	33		2.43854	0.619588	28		1.8453	0.181553	22
10.55	1.92696	0.475157	33		2.4281	0.623163	28		1.84865	0.186463	22
10.6	1.93136	0.473979	33		2.43085	0.623997	28		1.83594	0.177728	22
10.65	1.9285	0.474059	33		2.4298	0.624632	28		1.83672	0.174181	22
10.7	1.9328	0.474424	33		2.43271	0.629772	28		1.83595	0.185918	22
10.7503	1.92618	0.470804	33		2.42822	0.627003	28		1.83451	0.189611	22
10.8002	1.92902	0.474783	33		2.42323	0.630903	28		1.82992	0.188083	22
10.8502	1.92698	0.476666	33		2.42345	0.631673	28		1.81838	0.189132	22
10.9002	1.92145	0.476346	33		2.42114	0.633155	28		1.81139	0.184885	22
10.9502	1.91744	0.480332	33		2.4166	0.62371	28		1.80519	0.181618	22
11.0002	1.9205	0.477295	33		2.40537	0.630602	28		1.8084	0.181501	22
11.0502	1.92085	0.477755	33		2.40993	0.639706	28		1.80767	0.186743	22
11.1002	1.91432	0.47469	33		2.41172	0.63923	28		1.79847	0.179088	22
11.1502	1.91319	0.480056	33		2.40994	0.635509	28		1.79856	0.182472	22
11.2002	1.91267	0.474921	33		2.40439	0.640802	28		1.79115	0.176383	22
11.2501	1.90253	0.474672	33		2.4053	0.640882	28		1.79748	0.176143	22
11.3001	1.909	0.476815	33		2.39853	0.644361	28		1.79143	0.17089	22
11.3501	1.90721	0.479198	33		2.39558	0.636117	28		1.78854	0.172426	22
11.4001	1.90509	0.476171	33		2.38994	0.644597	28		1.7899	0.170186	22
11.4501	1.90595	0.476047	33		2.38929	0.644174	28		1.78742	0.170391	22
11.5001	1.90406	0.48171	33		2.38461	0.643428	28		1.77898	0.164692	22
11.5501	1.90185	0.473626	33		2.38472	0.647365	28		1.7792	0.166018	22
11.6001	1.89939	0.479679	33		2.37996	0.650452	28		1.77692	0.158564	22
11.6501	1.90053	0.473492	33		2.37974	0.645101	28		1.77222	0.158708	22
11.7	1.89637	0.471598	33		2.37665	0.650159	28		1.78092	0.159932	22
11.75	1.89524	0.477417	33		2.3755	0.645953	28		1.76958	0.157367	22
11.8	1.89779	0.476282	33		2.37512	0.643717	28		1.77473	0.156582	22
11.85	1.89589	0.474468	33		2.37735	0.651627	28		1.76371	0.153897	22
11.9003	1.89574	0.472112	33		2.37585	0.648813	28		1.7725	0.157833	22
11.9502	1.89293	0.468773	33		2.37034	0.647919	28		1.7716	0.154903	22
12.0002	1.8901	0.473403	33		2.37314	0.648632	28		1.77134	0.154846	22
12.0502	1.89324	0.472924	33		2.37166	0.645025	28		1.76704	0.157027	22
12.1002	1.89047	0.471615	33		2.36406	0.647803	28		1.76856	0.151372	22
12.1502	1.88618	0.467922	33		2.36485	0.641884	28		1.77134	0.156924	22
12.2002	1.88772	0.469637	33		2.36056	0.650114	28		1.76181	0.157582	22
12.2502	1.88554	0.469733	33		2.36884	0.653668	28		1.76838	0.153154	22
12.3002	1.88875	0.467367	33		2.36111	0.649141	28		1.77073	0.151514	22
12.3501	1.90097	0.485992	33		2.35761	0.647958	28		1.77044	0.152703	22
12.4001	1.90142	0.488184	33		2.35908	0.649002	28		1.77028	0.158444	22
12.4501	1.90108	0.480606	33		2.35893	0.648436	28		1.76623	0.154936	22
12.5001	1.90015	0.493034	33		2.35751	0.652182	28		1.77119	0.154688	22
12.5501	1.89612	0.488797	33		2.34965	0.645834	28		1.76941	0.15784	22
12.6001	1.89776	0.484175	33		2.35175	0.647305	28		1.76378	0.153563	22
12.6501	1.89966	0.484644	33		2.34805	0.646921	28		1.76353	0.160646	22
12.7001	1.89773	0.480888	33		2.35314	0.645984	28		1.76975	0.156773	22
12.7501	1.89352	0.481135	33		2.35302	0.646089	28		1.76204	0.157964	22
12.8	1.89777	0.490562	33		2.35233	0.646264	28		1.76908	0.154346	22
12.85	1.89517	0.487113	33		2.34924	0.646351	28		1.7675	0.157593	22
12.9	1.89404	0.480206	33		2.35345	0.641289	28		1.76423	0.154464	22
12.95	1.89321	0.484095	33		2.3565	0.647147	28		1.76159	0.148307	22
13.0003	1.89614	0.481297	33		2.35215	0.647098	28		1.76487	0.151566	22
13.0502	1.89778	0.484931	33		2.3536	0.642701	28		1.77112	0.160273	22
13.1002	1.89796	0.482345	33		2.35575	0.644532	28		1.76657	0.154153	22
13.1502	1.89356	0.484335	33		2.35935	0.645869	28		1.76327	0.158138	22
13.2002	1.89048	0.483627	33		2.35244	0.643581	28		1.75471	0.151863	22
13.2502	1.8908	0.484255	33		2.35488	0.643558	28		1.76018	0.153702	22
13.3002	1.89322	0.479342	33		2.35941	0.646896	28		1.76673	0.152896	22
13.3502	1.89225	0.484779	33		2.34871	0.63929	28		1.7628	0.151767	22
13.4002	1.89334	0.481176	33		2.35142	0.64153	28		1.76759	0.157533	22
13.4502	1.88903	0.484072	33		2.3504	0.642533	28		1.76332	0.156979	22
13.5001	1.89395	0.484642	33		2.35441	0.639212	28		1.76772	0.155505	22
13.5501	1.8953	0.485573	33		2.35515	0.642485	28		1.76025	0.150668	22
13.6001	1.89008	0.482563	33		2.36461	0.641763	28		1.76353	0.158309	22
13.6501	1.88681	0.484129	33		2.36415	0.644132	28		1.76086	0.152902	22
13.7001	1.89568	0.482099	33		2.36871	0.638996	28		1.76657	0.156731	22
13.7501	1.88827	0.476735	33		2.36276	0.640626	28		1.74899	0.15149	22
13.8001	1.88802	0.479114	33		2.36861	0.644929	28		1.76299	0.154201	22
13.8501	1.8892	0.477234	33		2.36547	0.637849	28		1.75739	0.15422	22
13.9	1.88989	0.482407	33		2.36414	0.640215	28		1.75603	0.156171	22
13.95	1.88841	0.481164	33		2.36657	0.639998	28		1.76508	0.163314	22
14	1.88299	0.477686	33		2.35861	0.6381	28		1.76358	0.15511	22
14.05	1.88796	0.476944	33		2.36355	0.640625	28		1.76975	0.159265	22
14.1003	1.88398	0.476665	33		2.37048	0.637874	28		1.75443	0.153612	22
14.1502	1.89022	0.479585	33		2.36413	0.638963	28		1.75192	0.158791	22
14.2002	1.88981	0.481028	33		2.36662	0.639898	28		1.75743	0.153199	22
14.2502	1.88424	0.4771	33		2.36358	0.640524	28		1.75827	0.154676	22
14.3002	1.88223	0.477411	33		2.37115	0.641842	28		1.75305	0.157042	22
14.3502	1.88435	0.475076	33		2.36669	0.63924	28		1.75413	0.15569	22
14.4002	1.88489	0.480278	33		2.36088	0.640151	28		1.75574	0.154767	22
14.4502	1.88077	0.475743	33		2.36544	0.638358	28		1.7562	0.153251	22
14.5002	1.88015	0.470747	33		2.36421	0.638393	28		1.75387	0.151872	22
14.5502	1.88526	0.471285	33		2.36323	0.634547	28		1.74656	0.154192	22
14.6001	1.88148	0.469872	33		2.37104	0.63796	28		1.7512	0.15482	22
14.6501	1.88181	0.47071	33		2.36587	0.639758	28		1.74507	0.152005	22
14.7001	1.88177	0.472289	33		2.35897	0.639046	28		1.74388	0.153067	22
14.7501	1.88287	0.475625	33		2.36406	0.647364	28		1.75275	0.152825	22
14.8001	1.88288	0.469071	33		2.35956	0.644711	28		1.7394	0.154616	22
14.8501	1.88348	0.474364	33		2.36176	0.647899	28		1.74374	0.149966	22
14.9001	1.87657	0.463403	33		2.35875	0.643803	28		1.74	0.154082	22
14.9501	1.87582	0.469842	33		2.35287	0.639393	28		1.73758	0.153557	22

## Sheet: Fig.2I
														Basal ratios
	MCF-7 ctrl				MCF-7 + BKCa - RFP				MCF-7 + BKCa-DEC - RFP					MCF-7
Time (min)	Average	SD	N (cells)		Average	SD	N (cells)		Average	SD	N (cells)			ctrl	+BKCa - RFP	+BKCa-DEC - RFP
0	2.36857	0.396094	28		2.31996	0.360103	27		1.99569	0.268185	24			1.98701	2.32984	2.25431
0.052733	2.38141	0.394044	28		2.30717	0.346483	27		2.02093	0.288122	24			2.43841	2.41118	2.02117
0.10235	2.39184	0.393624	28		2.31253	0.335067	27		1.99375	0.245944	24			2.59698	2.903	2.0419
0.15245	2.39116	0.39499	28		2.33995	0.370068	27		1.99111	0.266819	24			2.17326	1.88346	2.679
0.2027	2.41608	0.4063	28		2.31594	0.32242	27		2.00483	0.279778	24			2.71385	3.55271	1.90096
0.252483	2.40049	0.394609	28		2.32431	0.352313	27		1.99123	0.259241	24			2.66293	2.14693	1.76177
0.302767	2.4126	0.408667	28		2.32401	0.339628	27		1.99017	0.262277	24			2.29164	2.05814	2.44649
0.352333	2.41045	0.406218	28		2.33795	0.349048	27		1.99947	0.279985	24			2.23509	2.51703	2.33069
0.402733	2.41464	0.403707	28		2.32618	0.340765	27		1.99601	0.281888	24			1.96671	1.92332	2.02354
0.452533	2.39716	0.397458	28		2.32622	0.335231	27		1.98958	0.244082	24			2.05456	2.57238	1.49233
0.494665	2.39738	0.404142	28		2.31829	0.334302	27		1.98749	0.256231	24			2.15108	2.44216	1.70916
0.552602	2.40181	0.404929	28		2.33033	0.339617	27		2.00431	0.269366	24			2.31528	2.13265	1.82267
0.602543	2.41735	0.402322	28		2.32907	0.339079	27		2.00621	0.264848	24			2.43314	2.44365	1.72699
0.652488	2.39656	0.394781	28		2.33244	0.359149	27		1.98888	0.244679	24			2.47496	1.96737	2.14359
0.702403	2.41054	0.401664	28		2.33832	0.358255	27		1.99126	0.248774	24			1.97409	2.46218	2.22703
0.752768	2.40823	0.389809	28		2.322	0.337888	27		1.99464	0.265895	24			3.20842	2.2812	1.82853
0.802365	2.41383	0.398516	28		2.32672	0.333334	27		2.00214	0.277113	24			3.57537	2.49099	1.74125
0.852483	2.41681	0.392054	28		2.32888	0.352257	27		1.99341	0.266474	24			1.98731	1.92717	2.15027
0.902412	2.41209	0.397223	28		2.31317	0.337043	27		2.0093	0.270328	24			2.52261	2.05624	1.7702
0.952577	2.39463	0.38992	28		2.33219	0.360671	27		1.97071	0.240729	24			2.01811	2.55979	1.80469
1.00257	2.40308	0.401071	28		2.32508	0.365349	27		1.9931	0.254798	24			2.58656	2.03965	1.98973
1.05242	2.4026	0.392804	28		2.33192	0.343684	27		2.00035	0.273485	24			3.07662	2.34403	1.88336
1.10285	2.401	0.398998	28		2.32679	0.343896	27		1.98534	0.263386	24			2.70172	2.36879	2.04835
1.15247	2.39198	0.388171	28		2.32298	0.348247	27		1.98621	0.265214	24			2.24366	2.51903	2.12108
1.20252	2.40341	0.390013	28		2.32254	0.342334	27		1.98072	0.250953	24			2.1497	1.99854
1.25245	2.41391	0.390506	28		2.31843	0.341858	27		1.98924	0.255747	24			2.00328	2.12775
1.30239	2.40617	0.389147	28		2.31399	0.333173	27		2.00983	0.262076	24			2.51334	2.31498
1.35237	2.41447	0.394679	28		2.31661	0.333679	27		1.99729	0.257897	24			2.15531
1.4024	2.41929	0.388245	28		2.32263	0.338375	27		1.98516	0.248515	24
1.45245	2.40832	0.388184	28		2.32453	0.342031	27		1.99084	0.246266	24
1.50261	2.40546	0.383483	28		2.318	0.341534	27		1.98467	0.248672	24
1.5525	2.41524	0.385767	28		2.3147	0.320236	27		1.98867	0.243305	24
1.60251	2.42329	0.382223	28		2.31939	0.330118	27		1.98453	0.254597	24
1.6526	2.41052	0.385471	28		2.34132	0.36623	27		1.97491	0.241803	24
1.70256	2.41814	0.385114	28		2.32938	0.350909	27		1.99797	0.27556	24
1.75247	2.40106	0.386465	28		2.32638	0.345405	27		1.98815	0.257189	24
1.80252	2.40298	0.388692	28		2.3164	0.330562	27		1.98303	0.248465	24
1.8524	2.39212	0.385117	28		2.3227	0.365097	27		1.99646	0.278613	24
1.90249	2.40049	0.391544	28		2.32067	0.338026	27		1.98685	0.250293	24
1.95245	2.39527	0.39037	28		2.33649	0.365009	27		1.99201	0.247581	24
2.00251	2.39201	0.39657	28		2.32978	0.347593	27		1.98015	0.245902	24
2.05238	2.38742	0.382942	28		2.31872	0.323319	27		1.98428	0.249916	24
2.10254	2.40092	0.391324	28		2.32947	0.343203	27		1.99928	0.274673	24
2.1525	2.39294	0.384984	28		2.32572	0.355314	27		1.99936	0.276222	24
2.20253	2.39526	0.395913	28		2.31535	0.331346	27		1.98604	0.261153	24
2.25245	2.37794	0.390934	28		2.33222	0.348863	27		1.99447	0.248785	24
2.30256	2.38651	0.382772	28		2.33463	0.356348	27		1.99363	0.255709	24
2.35245	2.39473	0.394002	28		2.33284	0.354406	27		1.99798	0.258912	24
2.40257	2.37578	0.381671	28		2.32396	0.351359	27		2.02405	0.30238	24
2.45263	2.37596	0.383253	28		2.33136	0.327178	27		1.9873	0.250819	24
2.50259	2.37681	0.382865	28		2.3179	0.349668	27		1.98717	0.247026	24
2.5525	2.37494	0.382789	28		2.34125	0.355682	27		1.99652	0.257503	24
2.6026	2.38225	0.385486	28		2.32873	0.353398	27		1.99723	0.270551	24
2.65247	2.39113	0.398055	28		2.3296	0.351303	27		2.18032	0.635144	24
2.70252	2.39584	0.386739	28		2.324	0.335604	27		1.99448	0.264978	24
2.75264	2.39633	0.384969	28		2.34252	0.358272	27		1.99009	0.25532	24
2.80255	2.38895	0.381417	28		2.33504	0.355358	27		1.99173	0.257277	24
2.85241	2.38593	0.381971	28		2.31373	0.338363	27		1.98929	0.26716	24
2.90255	2.38225	0.389559	28		2.33761	0.348932	27		2.1373	0.525123	24
2.9526	2.39253	0.388375	28		2.33562	0.376071	27		2.00569	0.274934	24
3.00247	2.40056	0.38674	28		2.32251	0.333013	27		1.996	0.262791	24
3.0526	2.38781	0.386717	28		2.32378	0.336845	27		2.00689	0.269505	24
3.1024	2.40682	0.392281	28		2.33322	0.356473	27		1.99649	0.263144	24
3.15252	2.38432	0.391881	28		2.32257	0.33087	27		2.00099	0.256633	24
3.20241	2.38384	0.39009	28		2.32963	0.353937	27		1.98571	0.242465	24
3.25247	2.38327	0.389609	28		2.32478	0.329113	27		2.00242	0.281406	24
3.30253	2.39094	0.393618	28		2.33178	0.333835	27		1.98907	0.257898	24
3.3526	2.39683	0.389125	28		2.32384	0.37249	27		1.99486	0.265863	24
3.40266	2.40973	0.387998	28		2.32783	0.341234	27		1.99392	0.2693	24
3.45256	2.40679	0.391254	28		2.32096	0.353046	27		1.98664	0.261915	24
3.5026	2.40746	0.390364	28		2.31169	0.332786	27		1.99006	0.257988	24
3.55245	2.39172	0.387107	28		2.32156	0.337689	27		1.99491	0.260002	24
3.60239	2.41233	0.394474	28		2.32316	0.335811	27		1.99	0.253357	24
3.65253	2.39141	0.403903	28		2.32105	0.342404	27		1.99279	0.260116	24
3.70242	2.40123	0.397876	28		2.32294	0.346328	27		2.0008	0.268849	24
3.75253	2.38525	0.389037	28		2.33039	0.354791	27		1.99949	0.265434	24
3.80259	2.39316	0.394409	28		2.31997	0.345246	27		1.99361	0.261256	24
3.8525	2.42009	0.393881	28		2.32936	0.342189	27		1.98519	0.258358	24
3.90243	2.40961	0.400381	28		2.31611	0.343329	27		1.99439	0.249044	24
3.95285	2.4113	0.40176	28		2.34648	0.385138	27		1.98922	0.251035	24
4.00261	2.39431	0.402787	28		2.3178	0.34616	27		1.99303	0.245688	24
4.05243	2.40962	0.4002	28		2.31781	0.332975	27		1.9935	0.27084	24
4.10258	2.42355	0.404495	28		2.30954	0.333022	27		1.99072	0.254178	24
4.15261	2.40914	0.40002	28		2.32666	0.338309	27		2.00094	0.25658	24
4.23685	2.41491	0.393999	28		2.31684	0.335148	27		1.98833	0.254817	24
4.26925	2.4069	0.397986	28		2.32383	0.34493	27		1.98188	0.296962	24
4.30288	2.40795	0.404793	28		2.33456	0.366615	27		1.98502	0.245742	24
4.35249	2.40524	0.402672	28		2.32303	0.336744	27		1.999	0.266093	24
4.40253	2.41273	0.392137	28		2.32441	0.336095	27		1.99971	0.261946	24
4.45244	2.41199	0.392497	28		2.30448	0.345133	27		1.99163	0.262305	24
4.5025	2.40557	0.397827	28		2.33131	0.368015	27		1.99174	0.270858	24
4.55245	2.40027	0.398611	28		2.31579	0.335833	27		1.99512	0.261452	24
4.60258	2.41181	0.400031	28		2.32738	0.360525	27		1.99559	0.261176	24
4.65243	2.4042	0.400638	28		2.3197	0.34614	27		1.98154	0.244378	24
4.70258	2.40945	0.391404	28		2.31658	0.315449	27		1.9978	0.262432	24
4.75243	2.40079	0.395744	28		2.32877	0.327857	27		1.98474	0.243635	24
4.80258	2.39623	0.39539	28		2.32083	0.342413	27		2.00848	0.286068	24
4.85245	2.41516	0.392388	28		2.3166	0.322703	27		1.99381	0.271696	24
4.90255	2.39575	0.394399	28		2.33572	0.365324	27		1.97733	0.244559	24
4.9526	2.41013	0.399644	28		2.32995	0.361988	27		1.98445	0.253096	24
5.00238	2.40794	0.40693	28		2.34185	0.365621	27		1.98546	0.257776	24
5.05245	2.40226	0.394499	28		2.31332	0.33628	27		2.15923	0.628056	24
5.10257	2.40234	0.397315	28		2.32282	0.341413	27		2.14548	0.632903	24
5.15243	2.39069	0.390735	28		2.32609	0.346835	27		2.13805	0.620854	24
5.2025	2.40758	0.387558	28		2.32866	0.338166	27		2.143	0.626675	24
5.25252	2.40721	0.389299	28		2.33469	0.348511	27		2.15532	0.633515	24
5.30263	2.40756	0.394964	28		2.34164	0.37399	27		2.15164	0.624608	24
5.35263	2.39531	0.385154	28		2.37495	0.333037	27		2.15659	0.625894	24
5.40259	2.41116	0.392469	28		2.48754	0.386581	27		2.14853	0.630227	24
5.4525	2.58432	0.431291	28		2.59438	0.437956	27		2.23623	0.668138	24
5.50242	2.70745	0.531211	28		2.6636	0.491449	27		2.3613	0.714112	24
5.5525	2.79216	0.535819	28		2.81161	0.457764	27		2.57356	0.8106	24
5.60241	2.86038	0.515524	28		2.94266	0.451143	27		2.63066	0.843408	24
5.65253	2.94599	0.512351	28		3.01092	0.471998	27		2.65809	0.858424	24
5.7024	2.97245	0.535683	28		3.07522	0.493884	27		2.70805	0.885545	24
5.75253	3.00513	0.552061	28		3.09791	0.490561	27		2.74092	0.889406	24
5.80258	3.02418	0.578939	28		3.13081	0.536072	27		2.73624	0.856044	24
5.85246	3.07413	0.638458	28		3.15433	0.56026	27		2.77584	0.87544	24
5.9024	3.0972	0.647827	28		3.21207	0.613455	27		2.77393	0.841088	24
5.95244	3.11185	0.655549	28		3.2025	0.61502	27		2.79756	0.852103	24
6.00246	3.12006	0.693846	28		3.20343	0.629855	27		2.77177	0.835755	24
6.0525	3.15021	0.710773	28		3.22367	0.661291	27		2.79454	0.829317	24
6.1026	3.12932	0.724376	28		3.26982	0.646909	27		2.79109	0.821586	24
6.15261	3.16176	0.701701	28		3.21498	0.647407	27		2.78836	0.817032	24
6.20252	3.15824	0.718378	28		3.22824	0.658538	27		2.77004	0.817184	24
6.25255	3.15732	0.717573	28		3.2547	0.686734	27		2.78194	0.803369	24
6.30245	3.12413	0.63934	28		3.2304	0.664641	27		2.77301	0.785606	24
6.35259	3.13941	0.699231	28		3.22109	0.665065	27		2.7646	0.777074	24
6.40243	3.1328	0.667958	28		3.21971	0.660459	27		2.74557	0.768434	24
6.45255	3.13216	0.634269	28		3.22974	0.685866	27		2.77159	0.773261	24
6.50245	3.17301	0.663046	28		3.20866	0.656008	27		2.75033	0.776967	24
6.55255	3.14644	0.665121	28		3.19423	0.661987	27		2.7483	0.761656	24
6.60259	3.15568	0.65115	28		3.19744	0.683874	27		2.72041	0.760173	24
6.6526	3.14268	0.62607	28		3.18791	0.657839	27		2.71826	0.766534	24
6.70258	3.11845	0.583736	28		3.18759	0.656354	27		2.70094	0.750694	24
6.75237	3.1103	0.606352	28		3.17216	0.688129	27		2.71238	0.759807	24
6.80259	3.10408	0.60492	28		3.13056	0.660727	27		2.67201	0.749823	24
6.85265	3.13576	0.612323	28		3.14975	0.66996	27		2.66501	0.744966	24
6.90243	3.12404	0.58792	28		3.12777	0.661568	27		2.67148	0.744827	24
6.95245	3.10388	0.571852	28		3.12658	0.661492	27		2.64461	0.732461	24
7.00256	3.09041	0.551946	28		3.06993	0.609953	27		2.65112	0.748278	24
7.05261	3.04729	0.537676	28		3.1012	0.637507	27		2.63094	0.742371	24
7.10241	3.06213	0.547775	28		3.08498	0.645995	27		2.63174	0.738886	24
7.15258	3.06334	0.547019	28		3.06954	0.637233	27		2.61553	0.745972	24
7.20256	3.0386	0.534053	28		3.05644	0.609492	27		2.6243	0.740131	24
7.25243	3.03378	0.545157	28		3.06616	0.632059	27		2.6118	0.727356	24
7.30249	3.02551	0.530123	28		3.01898	0.585905	27		2.59379	0.735541	24
7.35259	3.04826	0.528791	28		3.02878	0.612192	27		2.58836	0.728525	24
7.40252	3.02374	0.521555	28		3.00884	0.588908	27		2.55709	0.70886	24
7.4526	3.01748	0.537807	28		3.00829	0.582981	27		2.57052	0.715421	24
7.50243	3.01955	0.524229	28		3.00634	0.595312	27		2.53798	0.693115	24
7.55252	3.00395	0.527942	28		2.98506	0.602616	27		2.55239	0.696601	24
7.60252	3.00598	0.597701	28		2.98452	0.584317	27		2.54726	0.701655	24
7.65256	3.03672	0.697359	28		2.9603	0.569104	27		2.54245	0.704226	24
7.70242	3.0555	0.743484	28		2.94392	0.577861	27		2.54784	0.692047	24
7.7526	3.03237	0.74503	28		2.94517	0.571881	27		2.51789	0.684051	24
7.80241	3.03421	0.757614	28		2.94906	0.595408	27		2.51288	0.687724	24
7.85244	3.00784	0.715995	28		2.93035	0.572342	27		2.50585	0.680167	24
7.90255	3.02286	0.749308	28		2.92899	0.582317	27		2.51295	0.686692	24
7.95249	2.95484	0.660698	28		2.92683	0.562505	27		2.52057	0.682947	24
8.0026	2.97127	0.697872	28		2.88581	0.536936	27		2.48695	0.673964	24
8.05261	2.9856	0.694972	28		2.90474	0.549392	27		2.47707	0.6658	24
8.10245	2.95767	0.70032	28		2.87846	0.526546	27		2.49546	0.66896	24
8.15263	2.91998	0.643402	28		2.88886	0.541618	27		2.47868	0.659534	24
8.20252	2.92958	0.635792	28		2.88725	0.534889	27		2.46592	0.665672	24
8.2526	2.92473	0.6359	28		2.89789	0.555646	27		2.45146	0.667099	24
8.30245	2.95002	0.651377	28		2.89028	0.564022	27		2.45479	0.658656	24
8.35257	2.92731	0.659902	28		2.84623	0.549365	27		2.44789	0.657254	24
8.40262	2.90998	0.65662	28		2.85665	0.533948	27		2.4527	0.660619	24
8.45265	2.9084	0.659868	28		2.85356	0.532985	27		2.43596	0.657	24
8.50249	2.8889	0.636074	28		2.85735	0.533707	27		2.42787	0.656435	24
8.55252	2.87017	0.641387	28		2.87964	0.522539	27		2.43468	0.650851	24
8.6026	2.89227	0.667978	28		2.84153	0.536567	27		2.42437	0.650773	24
8.65258	2.8882	0.650505	28		2.81097	0.50591	27		2.42298	0.648961	24
8.70243	2.87114	0.622394	28		2.83261	0.528349	27		2.43113	0.653064	24
8.75241	2.87413	0.629901	28		2.8186	0.502585	27		2.41087	0.645921	24
8.80257	2.86112	0.653435	28		2.81455	0.51804	27		2.41819	0.659536	24
8.85255	2.85696	0.658454	28		2.8149	0.513536	27		2.41258	0.647797	24
8.90245	2.8596	0.639086	28		2.81464	0.501026	27		2.40317	0.647352	24
8.95256	2.84358	0.638631	28		2.78499	0.492423	27		2.3858	0.641887	24
9.00261	2.84094	0.617907	28		2.78977	0.501892	27		2.39032	0.652067	24
9.05245	2.83517	0.626206	28		2.80823	0.507358	27		2.38862	0.648149	24
9.10255	2.82777	0.639163	28		2.76895	0.493774	27		2.38664	0.644214	24
9.15258	2.82716	0.63345	28		2.78586	0.500101	27		2.38234	0.650047	24
9.20268	2.81096	0.622267	28		2.7576	0.487298	27		2.38754	0.651444	24
9.2526	2.80259	0.606023	28		2.76255	0.473829	27		2.37013	0.648654	24
9.30254	2.79201	0.626882	28		2.75319	0.487935	27		2.37939	0.64793	24
9.3524	2.81126	0.625156	28		2.71877	0.440539	27		2.36767	0.635981	24
9.40265	2.8166	0.637693	28		2.74848	0.474255	27		2.37064	0.630989	24
9.45253	2.77573	0.602632	28		2.72761	0.463157	27		2.37751	0.634707	24
9.50248	2.778	0.602703	28		2.7227	0.462992	27		2.34354	0.634791	24
9.55238	2.77057	0.614859	28		2.70841	0.446803	27		2.35195	0.637904	24
9.60285	2.77921	0.610309	28		2.68985	0.463426	27		2.3487	0.642085	24
9.65245	2.77113	0.607534	28		2.70138	0.46716	27		2.37682	0.638752	24
9.70246	2.75209	0.59415	28		2.67504	0.438132	27		2.34081	0.633772	24
9.75249	2.76742	0.595576	28		2.6846	0.458913	27		2.35303	0.636961	24
9.80249	2.73808	0.586151	28		2.67202	0.45335	27		2.34941	0.632527	24
9.85252	2.72104	0.576017	28		2.68025	0.484763	27		2.35544	0.631323	24
9.90257	2.74088	0.588091	28		2.69166	0.47485	27		2.35706	0.629773	24
9.95243	2.74445	0.583232	28		2.664	0.450122	27		2.35226	0.629143	24
10.0025	2.74334	0.611293	28		2.68516	0.469477	27		2.3741	0.642864	24
10.0524	2.72061	0.552937	28		2.65338	0.458018	27		2.3467	0.634049	24
10.1026	2.75169	0.612717	28		2.6786	0.479175	27		2.33908	0.63496	24
10.1526	2.73133	0.580563	28		2.6586	0.461587	27		2.35493	0.635292	24
10.2026	2.707	0.582618	28		2.63681	0.447897	27		2.32832	0.639115	24
10.2524	2.72549	0.582844	28		2.63827	0.432406	27		2.32691	0.634005	24
10.3026	2.70217	0.570379	28		2.6526	0.47721	27		2.32495	0.624762	24
10.3526	2.70974	0.578615	28		2.63471	0.444354	27		2.33063	0.633967	24
10.4024	2.69766	0.57214	28		2.62741	0.453778	27		2.33614	0.643618	24
10.4525	2.70605	0.561657	28		2.63051	0.470398	27		2.32006	0.638596	24
10.5026	2.69973	0.576887	28		2.62112	0.442951	27		2.31742	0.6375	24
10.5526	2.69667	0.555007	28		2.61403	0.459522	27		2.31349	0.631979	24
10.6026	2.67829	0.549692	28		2.61863	0.455281	27		2.32286	0.638143	24
10.6526	2.68046	0.563515	28		2.6026	0.447925	27		2.3071	0.627755	24
10.7024	2.67372	0.568405	28		2.57898	0.433304	27		2.30328	0.630646	24
10.7524	2.66965	0.531573	28		2.57649	0.425234	27		2.28748	0.62792	24
10.8025	2.68533	0.525659	28		2.56828	0.432309	27		2.28986	0.631902	24
10.8525	2.67684	0.541687	28		2.54966	0.439057	27		2.28724	0.630429	24
10.9024	2.66236	0.541509	28		2.56376	0.437743	27		2.28506	0.637019	24
10.9526	2.66706	0.535774	28		2.53618	0.420304	27		2.29412	0.643537	24
11.0024	2.66373	0.533982	28		2.53802	0.428154	27		2.26567	0.616243	24
11.0525	2.66247	0.524517	28		2.52485	0.41588	27		2.25831	0.621172	24
11.1025	2.65004	0.502054	28		2.51071	0.413915	27		2.25782	0.624758	24
11.1524	2.6232	0.489194	28		2.5259	0.432602	27		2.22661	0.611774	24
11.2026	2.65464	0.503737	28		2.52351	0.433341	27		2.23335	0.624243	24
11.2525	2.64015	0.472842	28		2.50799	0.408201	27		2.22803	0.616451	24
11.3024	2.63981	0.507363	28		2.50688	0.417594	27		2.21493	0.617051	24
11.3525	2.61617	0.457724	28		2.53456	0.451873	27		2.21359	0.603382	24
11.4025	2.61035	0.451871	28		2.50483	0.42557	27		2.22142	0.612414	24
11.4524	2.6026	0.465335	28		2.4974	0.420554	27		2.19432	0.608361	24
11.5025	2.59732	0.482995	28		2.52038	0.435321	27		2.18497	0.607408	24
11.5524	2.61003	0.486687	28		2.51852	0.441513	27		2.18379	0.606834	24
11.6025	2.61204	0.448334	28		2.50537	0.434084	27		2.18159	0.611065	24
11.6526	2.60933	0.469245	28		2.49142	0.414132	27		2.18794	0.602402	24
11.7024	2.58167	0.461378	28		2.49211	0.447295	27		2.1946	0.603992	24
11.7526	2.61466	0.460297	28		2.47551	0.402966	27		2.16601	0.612014	24
11.8024	2.61488	0.461854	28		2.49013	0.42695	27		2.17297	0.60427	24
11.8524	2.59259	0.455668	28		2.49108	0.418848	27		2.17173	0.605231	24
11.9025	2.60177	0.458152	28		2.46845	0.414627	27		2.21634	0.627834	24
11.9524	2.59712	0.445336	28		2.48648	0.43169	27		2.17583	0.609603	24
12.0025	2.59818	0.443171	28		2.49788	0.42946	27		2.17794	0.602554	24
12.0526	2.60146	0.452521	28		2.48038	0.428301	27		2.18267	0.617281	24
12.1024	2.60052	0.455095	28		2.49303	0.450227	27		2.17848	0.609217	24
12.1524	2.56759	0.412547	28		2.48559	0.414896	27		2.16633	0.607181	24
12.2026	2.57936	0.447348	28		2.48968	0.413829	27		2.16531	0.602993	24
12.2526	2.58921	0.446361	28		2.48505	0.41375	27		2.17441	0.604442	24
12.3025	2.58835	0.456282	28		2.48213	0.43789	27		2.16653	0.602329	24
12.3526	2.56077	0.438928	28		2.47712	0.422039	27		2.16341	0.6116	24
12.4025	2.5684	0.435267	28		2.46908	0.418012	27		2.16942	0.607076	24
12.4526	2.56101	0.417659	28		2.48317	0.443635	27		2.13199	0.610182	24
12.5025	2.55316	0.410098	28		2.49011	0.457698	27		2.15331	0.601093	24
12.5525	2.56862	0.448572	28		2.46877	0.43289	27		2.16279	0.607525	24
12.6026	2.58588	0.456167	28		2.47596	0.416879	27		2.15622	0.604192	24
12.6526	2.55327	0.422734	28		2.48506	0.429494	27		2.14435	0.606395	24
12.7026	2.55111	0.407054	28		2.47568	0.441971	27		2.15581	0.610196	24
12.7526	2.5553	0.422958	28		2.46219	0.435416	27		2.15802	0.604038	24
12.8024	2.54699	0.40603	28		2.46976	0.435227	27		2.14403	0.611745	24
12.8526	2.53988	0.39424	28		2.46268	0.415926	27		2.14751	0.605156	24
12.9025	2.55645	0.422995	28		2.45802	0.411533	27		2.15825	0.609631	24
12.9525	2.53507	0.410262	28		2.46715	0.429966	27		2.13767	0.608494	24
13.0025	2.53969	0.405398	28		2.47274	0.451464	27		2.15515	0.603669	24
13.0526	2.54458	0.420537	28		2.45769	0.42332	27		2.17733	0.602245	24
13.1024	2.53267	0.410753	28		2.46691	0.432366	27		2.15068	0.609078	24
13.1524	2.53352	0.397976	28		2.47135	0.434824	27		2.14123	0.607095	24
13.2024	2.528	0.409524	28		2.46996	0.420463	27		2.13746	0.610721	24
13.2525	2.53876	0.414641	28		2.45509	0.421042	27		2.14046	0.601508	24
13.3024	2.50481	0.385513	28		2.46009	0.424229	27		2.13015	0.59963	24
13.3526	2.52941	0.39237	28		2.45936	0.431544	27		2.12973	0.606633	24
13.4024	2.53151	0.411303	28		2.45753	0.42227	27		2.14769	0.611061	24
13.4529	2.5072	0.380298	28		2.44285	0.398186	27		2.14477	0.602848	24
13.5025	2.5128	0.409677	28		2.4561	0.428068	27		2.15318	0.614381	24
13.5525	2.51687	0.406229	28		2.46472	0.442235	27		2.13687	0.608644	24
13.6026	2.51023	0.373936	28		2.44982	0.39968	27		2.13319	0.603303	24
13.6524	2.51149	0.391575	28		2.46367	0.435795	27		2.13228	0.6111	24
13.7024	2.50868	0.386812	28		2.45254	0.419812	27		2.14298	0.604264	24
13.7525	2.5001	0.407483	28		2.46493	0.438076	27		2.13561	0.603816	24
13.8024	2.51125	0.395809	28		2.44691	0.409535	27		2.13022	0.609088	24
13.8526	2.5126	0.416939	28		2.45929	0.430514	27		2.1406	0.609933	24
13.9026	2.52333	0.399865	28		2.4503	0.424016	27		2.12918	0.606333	24
13.9525	2.51464	0.402636	28		2.43856	0.416867	27		2.1471	0.609557	24
14.0025	2.50568	0.390485	28		2.44672	0.427662	27		2.1237	0.60963	24
14.0526	2.51381	0.417952	28		2.44887	0.421477	27		2.14255	0.611401	24
14.1026	2.49619	0.389138	28		2.45656	0.455383	27		2.13508	0.612761	24
14.1526	2.51437	0.425224	28		2.45901	0.446027	27		2.13299	0.610904	24
14.2027	2.48431	0.397191	28		2.45562	0.428854	27		2.12775	0.599816	24
14.2525	2.50046	0.378145	28		2.43787	0.430283	27		2.12171	0.606956	24
14.3025	2.49991	0.378533	28		2.44926	0.415725	27		2.13966	0.607374	24
14.3526	2.48797	0.395667	28		2.44453	0.422376	27		2.13397	0.608955	24
14.4024	2.4792	0.379526	28		2.45456	0.446166	27		2.13806	0.61158	24
14.4525	2.4863	0.38606	28		2.44422	0.4392	27		2.13964	0.609696	24
14.5026	2.4895	0.401879	28		2.46479	0.438252	27		2.13521	0.610435	24
14.5525	2.48906	0.387105	28		2.46737	0.44368	27		2.1357	0.606922	24
14.6024	2.48667	0.386153	28		2.43364	0.413231	27		2.14161	0.605444	24
14.6526	2.48234	0.372168	28		2.44159	0.448451	27		2.13484	0.616868	24
14.7025	2.46576	0.381032	28		2.44383	0.433392	27		2.13103	0.614157	24
14.7525	2.47594	0.361446	28		2.44406	0.430998	27		2.12961	0.610139	24
14.8026	2.48841	0.391298	28		2.44159	0.441771	27		2.14369	0.613655	24
14.8526	2.48729	0.387859	28		2.42193	0.422876	27		2.11554	0.604216	24
14.9029	2.45829	0.374817	28		2.42547	0.443847	27		2.13847	0.61481	24
14.9524	2.46951	0.359675	28		2.44463	0.43179	27		2.11831	0.617074	24
15.0026	2.45618	0.374981	28		2.44117	0.43256	27		2.12822	0.606995	24
