# Supplementary material for: mitoBKCa is functionally expressed in murine and human breast cancer cells and potentially contributes to metabolic reprogramming
Source: eLife. 2024 May 29;12:RP92511. doi: 10.7554/eLife.92511 (PMC11136494; doi:10.7554/eLife.92511)
Supplement: Figure 3—figure supplement 1—source data 1. [file elife-92511-fig3-figsupp1-data1.xlsx]

## Sheet: Fig.S3A
	MMTV-PyMT WT + PAX
Time (min)	Replicate1	Replicate2	Replicate3	Replicate4	Replicate5	Replicate6	Replicate7	Replicate8	Replicate9	Replicate10	Replicate11
1.38	0.83	0.81	0.89	0.82	0.39	0.7	0.53	0.27	0.05	0.34	0.05
9.89	0.85	0.83	0.92	0.85	0.38	0.65	0.54	0.28	0.06	0.37	0.09
18.4	0.87	0.87	0.92	0.87	0.39	0.7	0.52	0.28	0.06	0.35	0.07
27.02	1.19	1.2	1.27	1.17	0.51	0.81	0.7	0.37	0.2	0.84	0.3
35.54	1.33	1.35	1.4	1.24	0.52	0.88	0.7	0.4	0.21	0.88	0.33
44.05	1.33	1.35	1.43	1.25	0.52	0.86	0.74	0.37	0.22	0.89	0.35
52.67	1.45	1.46	1.53	1.38	0.58	0.93	0.76	0.41	0.25	0.99	0.16
61.18	1.44	1.44	1.53	1.33	0.59	0.99	0.75	0.44	0.25	0.94	0.14
69.69	1.4	1.41	1.51	1.34	0.61	0.98	0.77	0.46	0.25	0.92	0.16
78.3	1.21	1.16	1.25	1.05	0.41	0.64	0.52	0.28	0.23	0.88	0.17
86.81	1.2	1.17	1.24	1.08	0.4	0.62	0.54	0.29	0.24	0.9	0.17
95.31	1.18	1.13	1.23	1.05	0.41	0.69	0.52	0.31	0.23	0.88	0.15
	MMTV-PyMT BK-KO + PAX
Time (min)	Replicate1	Replicate2	Replicate3	Replicate4	Replicate5	Replicate6	Replicate7	Replicate8	Replicate9	Replicate10	Replicate11	Replicate12
1.38	0.37	0.29	0.16	0.27	0.2	0.14	0.34	0.16	0.41	0.57	0.5	0.7
9.89	0.37	0.29	0.15	0.3	0.18	0.15	0.31	0.18	0.44	0.58	0.52	0.72
18.4	0.37	0.3	0.16	0.25	0.18	0.14	0.35	0.16	0.43	0.55	0.55	0.67
27.02	0.99	0.79	0.36	0.68	0.41	0.33	0.61	0.38	0.95	1.05	1.2	1.52
35.54	1.04	0.85	0.43	0.69	0.48	0.43	0.67	0.38	1.11	1.22	1.39	1.78
44.05	1.04	0.83	0.39	0.69	0.48	0.4	0.66	0.43	1.15	1.23	1.44	1.87
52.67	1.1	0.93	0.45	0.77	0.58	0.5	0.77	0.48	1.32	1.43	1.58	2.08
61.18	1.06	0.9	0.43	0.76	0.56	0.51	0.77	0.46	1.28	1.42	1.57	2
69.69	1.04	0.92	0.47	0.74	0.55	0.51	0.79	0.46	1.27	1.39	1.55	1.95
78.3	0.9	0.78	0.37	0.66	0.41	0.34	0.61	0.36	1.11	1.19	1.33	1.74
86.81	0.92	0.8	0.41	0.65	0.42	0.34	0.66	0.35	1.1	1.2	1.35	1.78
95.31	0.92	0.81	0.39	0.63	0.43	0.37	0.69	0.36	1.09	1.16	1.32	1.74

## Sheet: Fig.S3B
	MMTV-PyMT WT + IBTX
Time (min)	Replicate1	Replicate2	Replicate3	Replicate4	Replicate5	Replicate6	Replicate7	Replicate8
1.38	1.07	0.89	0.98	0.89	0.51	0.65	0.52	0.28
9.89	1.07	0.9	1	0.86	0.52	0.61	0.61	0.25
18.4	1.07	0.89	0.99	0.84	0.45	0.67	0.6	0.26
27.02	1.77	1.35	1.55	2.39	1.41	1.7	1.62	0.87
35.54	2.01	1.63	1.81	2.6	1.64	1.86	1.66	0.94
44.05	2.08	1.65	1.94	2.72	1.73	1.97	1.74	1.03
52.67	2.04	1.67	1.85	2.79	1.88	2.08	1.78	1.09
61.18	2	1.61	1.82	2.75	1.81	2.14	1.78	1.06
69.69	1.98	1.62	1.82	2.76	1.84	2.14	1.74	1.03
78.3	1.79	1.48	1.63	2.21	1.51	1.63	1.76	0.95
86.81	1.8	1.48	1.66	2.29	1.66	1.73	1.75	1
95.31	1.75	1.45	1.63	2.4	1.61	1.78	1.72	0.96
	MMTV-PyMT BK-KO + IBTX
Time(min)	Replicate1	Replicate2	Replicate3	Replicate4	Replicate5	Replicate6	Replicate7	Replicate8	Replicate9
1.38	0.32	0.06	0.19	0.98	0.44	0.46	0.25	0.19	0.18
9.89	0.33	0.07	0.19	0.99	0.42	0.46	0.28	0.19	0.22
18.4	0.35	0.09	0.21	0.97	0.48	0.49	0.28	0.19	0.22
27.02	1.07	0.43	0.63	1.55	0.67	0.75	0.69	0.53	0.71
35.54	1.12	0.47	0.7	1.58	0.68	0.77	0.86	0.7	0.87
44.05	1.13	0.47	0.67	1.55	0.68	0.77	0.88	0.74	0.88
52.67	1.27	0.55	0.78	1.85	0.79	0.93	0.97	0.85	1
61.18	1.22	0.55	0.76	1.85	0.79	0.9	0.93	0.85	1
69.69	1.22	0.55	0.78	1.72	0.79	0.91	0.92	0.84	1
78.3	1.03	0.42	0.62	1.24	0.5	0.54	0.81	0.75	0.88
86.81	1.12	0.48	0.66	1.22	0.52	0.55	0.83	0.8	0.91
95.31	1.12	0.47	0.66	1.25	0.55	0.55	0.83	0.79	0.89

## Sheet: Fig.S3C
	MMTV-PyMT WT + PAX
Time (min)	Replicate1	Replicate2	Replicate3	Replicate4	Replicate5	Replicate6	Replicate7	Replicate8	Replicate9	Replicate10	Replicate11
1.38	6.41	8.13	7.21	5.58	2.45	4.52	2.8	1.47	2.03	5.24	3.32
9.9	6.42	8.02	7.13	5.55	2.38	4.31	2.77	1.44	2.04	5.31	3.2
18.42	6.4	7.97	7.18	5.65	2.36	4.23	2.71	1.38	1.99	5.23	2.99
26.94	2.77	4.08	3.57	2.63	1.15	1.53	1.32	0.59	1.05	2.47	2.82
35.58	2.82	4.4	3.69	2.63	1.31	2.22	1.49	0.73	1.03	2.55	2.5
44.09	2.91	4.44	3.82	2.76	1.42	2.47	1.6	0.72	1.03	2.54	2.35
52.6	9.05	11.78	10.5	8.3	4.95	7.38	4.57	2.61	2.13	7.5	-0.34
61.23	7.84	9.75	9.4	7.22	4.58	6.62	4.73	2.55	2.08	7.14	-0.17
69.75	6.78	8.3	8.21	6.29	4.34	6.84	4.68	2.51	1.95	6.63	-0.37
78.26	0.97	1.94	1.6	0.97	0.49	1.43	0.84	0.37	0.72	1.78	-1.56
86.9	0.89	1.93	1.59	0.88	0.54	1.33	0.72	0.41	0.73	1.76	-1.7
95.41	0.86	1.93	1.51	0.89	0.52	1.48	0.69	0.37	0.71	1.7	-1.68
	MMTV-PyMT BK-KO + PAX
Time (min)	Replicate1	Replicate2	Replicate3	Replicate4	Replicate5	Replicate6	Replicate7	Replicate8	Replicate9	Replicate10	Replicate11	Replicate12
1.38	5.59	6.05	2.82	3.86	2.77	2.41	3.6	2.3	6.5	3.41	6.05	10.05
9.9	5.6	6.03	2.83	3.75	2.61	2.25	3.41	2.24	6.6	3.4	6.02	10.15
18.42	5.6	6.13	2.9	3.74	2.7	2.32	3.43	2.16	6.66	3.37	6.05	10.24
26.94	2.55	2.62	1.67	1.72	0.81	0.81	1.15	0.63	2.66	1.96	2.49	3.96
35.58	2.59	2.78	1.74	1.81	0.81	0.89	1.29	0.71	2.77	1.92	2.41	3.96
44.09	2.65	2.87	1.85	1.81	0.73	0.82	1.22	0.77	2.81	1.71	2.49	3.87
52.6	7.91	9.28	4.7	6.6	5.97	4.13	6.69	4.94	14.19	6.87	12.22	20.79
61.23	7.37	8.33	4.45	5.94	6.04	4.61	7.35	5.06	13.04	6.39	11.85	20.21
69.75	6.68	7.38	4.04	5.2	6.23	4.8	7.55	5.01	11.9	5.93	11.01	18.91
78.26	1.22	1.38	1.4	0.6	0.85	1.03	1.31	0.56	1.95	1.61	1.72	2.38
86.9	1.32	1.31	1.44	0.66	0.89	0.96	1.29	0.6	2.08	1.68	1.79	2.43
95.41	1.26	1.3	1.45	0.82	0.88	1	1.27	0.5	2.1	1.63	1.81	2.39

## Sheet: Fig.S3D
	MMTV-PyMT WT + IBTX
Time (min)	Replicate1	Replicate2	Replicate3	Replicate4	Replicate5	Replicate6	Replicate7	Replicate8
1.38	10.37	9.27	8.46	12.67	9.63	9.49	10.02	6.07	3.32
9.9	10.39	9.2	8.41	12.53	10.25	9.33	11.23	5.98	3.6
18.42	10.47	9.29	8.57	13.29	10.62	9.31	10.68	6.02	3.4
26.94	4.22	4.05	3.8	3.94	3.68	2.36	5.17	2.57	2.69
35.58	4.43	4.41	3.94	4.11	3.84	2.69	5.26	2.58	2.54
44.09	4.42	4.46	3.93	3.71	3.88	2.73	5.23	2.6	2.66
52.6	13.67	11.44	11.49	20.1	12.64	14.63	10.12	10.39	3.8
61.23	11.21	10.23	10.35	21.52	13.67	16.28	9.57	9.42	3.56
69.75	9.58	9.07	9.09	23.07	15.05	17.23	9.11	8.17	3.45
78.26	1.89	3.25	2.05	4.04	4.62	1.65	4.47	1.96	2.69
86.9	1.89	3.05	2.12	4.25	4.54	2.33	4.38	1.93	2.77
95.41	1.77	2.99	2.05	4.31	4.57	2.07	4.31	1.96	2.86
	MMTV-PyMT BK-KO + IBTX
Time(min)	Replicate1	Replicate2	Replicate3	Replicate4	Replicate5	Replicate6	Replicate7	Replicate8	Replicate9
1.38	6.97	4.36	4.82	2.51	3.45	3.9	5.45	6.39	6.8
9.9	6.94	4.27	4.82	2.39	3.29	3.84	5.39	6.32	6.74
18.42	7	4.32	4.82	2.43	3.53	3.83	5.37	6.34	6.78
26.94	2.73	2.14	1.96	0.95	1.56	1.68	2.04	2.86	3.01
35.58	2.91	2.19	2.05	1.15	1.69	1.94	2.11	2.91	2.9
44.09	2.9	2.27	2.14	1.12	1.7	2.01	2.02	2.89	2.97
52.6	11.69	6.42	7.25	3.85	4.58	6.29	10.06	11.08	11.71
61.23	10.19	6.2	7.03	3.72	4.96	6.15	9.37	10.56	11.3
69.75	9.13	5.67	6.43	3.63	4.99	6.04	8.49	9.56	10.35
78.26	1.82	1.26	1.19	0.71	1.29	0.77	1.5	2.13	2.13
86.9	1.87	1.36	1.25	0.78	1.22	0.86	1.49	2.3	2.13
95.41	1.92	1.39	1.2	0.74	1.11	0.8	1.46	2.13	2.19
