# Supplementary material for: mitoBKCa is functionally expressed in murine and human breast cancer cells and potentially contributes to metabolic reprogramming
Source: eLife. 2024 May 29;12:RP92511. doi: 10.7554/eLife.92511 (PMC11136494; doi:10.7554/eLife.92511)
Supplement: Figure 3—source data 1. [file elife-92511-fig3-data1.xlsx]

## Sheet: Fig.3A
	MMTV-PyMT WT ctrl
Time (min)	Replicate1	Replicate2	Replicate3	Replicate4	Replicate5	Replicate6	Replicate7	Replicate8	Replicate9	Replicate10	Replicate11	Replicate12	Replicate13	Replicate14	Replicate15	Replicate16	Replicate17	Replicate18	Replicate19	Replicate20	Replicate21	Replicate22	Replicate23	Replicate24	Replicate25	Replicate26	Replicate27	Replicate28	Replicate29	Replicate30	Replicate31
1.38	1.4	1.34	1.38	1.59	1.33	0.59	0.33	0.49	1.14	1.36	0.46	1.35	0.9	0.73	2.23	1.91	0.73	1.61	2.76	0.29	0.1	0.46	0.41	0.51	0.91	0.95	1.04	0.98	1.05	0.02	0.6
9.89	1.43	1.33	1.36	1.6	1.32	0.62	0.33	0.51	1.16	1.28	0.49	1.35	0.94	0.79	2.18	2.02	0.91	1.24	3.31	0.28	0.27	0.3	0.49	0.39	0.88	0.97	1.05	0.97	1.06	0.02	0.57
18.4	1.43	1.32	1.37	1.59	1.34	0.62	0.33	0.48	1.14	1.37	0.44	1.31	0.82	0.77	2.45	1.93	0.71	2.01	2.88	0.37	0.17	0.71	0.4	0.6	0.88	0.98	1.1	1.01	1.05	0.02	0.63
27.02	2.21	2.02	2.12	2.49	2.3	0.85	0.5	0.69	1.72	2.48	0.63	2.03	1.31	1.19	2.63	1.98	0.74	1.52	3.33	0.73	0.55	0.81	1.11	1.01	1.38	1.43	1.58	1.61	1.77	0.15	1.88
35.54	2.23	2.02	2.14	2.55	2.42	0.87	0.51	0.68	1.76	2.34	0.67	2.13	1.4	1.24	2.59	2.34	1.09	1.77	3.4	0.77	0.68	0.91	1.1	1.02	1.62	1.58	1.73	1.62	1.85	0.14	2.01
44.05	2.24	2.05	2.19	2.57	2.45	0.89	0.51	0.75	1.78	2.67	0.71	2.03	1.42	1.2	2.61	2.42	1.11	1.84	3.45	0.79	0.59	0.98	0.92	0.97	1.63	1.62	1.71	1.63	1.88	0.14	2.07
52.67	2.65	2.43	2.64	3.03	3.05	1.01	0.56	0.76	2.09	3.05	0.82	2.4	1.64	1.41	3.15	3.13	1.36	2.06	3.94	0.93	0.61	1.01	1.01	0.98	1.71	1.71	1.82	1.78	2.01	0.17	1.97
61.18	3.02	2.43	2.61	3.22	3.01	1.02	0.57	0.8	2.13	2.96	0.82	2.58	1.62	1.48	3.2	3	1.18	2.15	4.06	0.94	0.62	1.08	1.2	0.99	1.67	1.69	1.82	1.78	2.03	0.2	2.18
69.69	3	2.38	2.62	3.19	2.97	1.04	0.59	0.81	2.12	3.08	0.82	2.6	1.62	1.48	3.18	2.95	1.13	2.11	4.08	0.89	0.65	1.16	1	0.87	1.67	1.68	1.8	1.79	2.08	0.18	2.15
78.3	2.27	1.85	2	2.42	2.21	0.87	0.46	0.6	1.54	1.89	0.57	1.77	1.18	0.99	2.47	2.11	1.06	1.84	3.09	0.95	0.64	0.93	1.32	1.25	1.4	1.36	1.51	1.18	1.32	0.16	2.12
86.81	2.26	1.79	1.95	2.36	2.17	0.88	0.47	0.64	1.43	2.05	0.61	1.69	1.2	0.93	2.49	2.13	1.1	1.46	3.24	0.9	0.74	0.99	1.19	1.03	1.41	1.38	1.51	1.17	1.31	0.2	2.24
95.31	2.24	1.76	1.92	2.36	2.16	0.86	0.46	0.61	1.4	1.99	0.59	1.71	1.16	0.94	2.44	2.33	0.99	1.14	3.28	0.92	0.66	0.82	1.28	1	1.35	1.39	1.48	1.17	1.29	0.24	2.11
	MMTV-PyMT BK-KO ctrl
Time (min)	Replicate1	Replicate2	Replicate3	Replicate4	Replicate5	Replicate6	Replicate7	Replicate8	Replicate9	Replicate10	Replicate11	Replicate12	Replicate13	Replicate14	Replicate15	Replicate16	Replicate17	Replicate18	Replicate19	Replicate20	Replicate21	Replicate22	Replicate23	Replicate24	Replicate25	Replicate26	Replicate27	Replicate28	Replicate29	Replicate30	Replicate31	Replicate32
1.38	0.69	0.18	0.1	0.1	0.3	0.38	0.41	0.43	0.08	0.72	0.16	0.26	0.28	0.24	0.24	0.43	0.19	0.33	0.88	0.68	0.45	0.36	0.9	0.34	0.22	0.29	0.12	0.23	0.19	0.48	0.69	0.41
9.89	0.62	0.18	0.1	0.11	0.31	0.4	0.39	0.44	0.11	0.8	0.17	0.27	0.28	0.23	0.27	0.44	0.18	0.4	0.93	0.5	0.61	0.55	0.71	0.34	0.18	0.3	0.1	0.18	0.21	0.51	0.77	0.43
18.4	0.63	0.18	0.1	0.11	0.31	0.41	0.36	0.5	0.1	0.78	0.15	0.26	0.26	0.27	0.23	0.42	0.25	0.25	0.97	0.71	0.56	0.42	0.92	0.36	0.21	0.3	0.09	0.18	0.19	0.51	0.7	0.44
27.02	1.17	0.31	0.18	0.19	0.53	0.92	0.82	0.85	0.2	1.72	0.5	0.69	0.65	0.53	0.51	1.01	0.3	0.38	2.02	1.55	0.99	0.89	1.6	1.15	0.65	0.89	0.35	0.52	0.55	1.28	1.63	1.09
35.54	1.21	0.32	0.19	0.19	0.54	0.97	0.9	0.92	0.22	1.87	0.52	0.73	0.7	0.59	0.56	1.08	0.38	0.48	2.16	1.59	1.16	0.98	1.61	1.16	0.74	0.88	0.39	0.55	0.6	1.52	2	1.29
44.05	1.26	0.34	0.2	0.2	0.56	1	0.97	0.95	0.23	1.98	0.53	0.75	0.68	0.65	0.58	1.09	0.37	0.71	2.2	1.54	1.21	0.99	1.65	1.16	0.74	0.89	0.39	0.55	0.6	1.53	2.09	1.34
52.67	1.44	0.38	0.22	0.22	0.65	1.08	1.03	1.12	0.22	2.08	0.61	0.88	0.77	0.71	0.61	1.23	0.46	0.82	2.37	1.81	1.28	1.04	1.75	1.33	0.76	1.01	0.41	0.57	0.6	1.55	2.4	1.28
61.18	1.51	0.39	0.23	0.23	0.65	1.09	1.05	1.09	0.23	2.13	0.63	0.87	0.8	0.69	0.59	1.28	0.47	0.71	2.41	1.79	1.21	1.13	1.73	1.34	0.79	1	0.41	0.57	0.59	1.58	2.48	1.3
69.69	1.53	0.4	0.23	0.24	0.67	1.13	1.06	1.17	0.23	2.16	0.62	0.87	0.78	0.72	0.58	1.27	0.44	0.79	2.44	1.79	1.22	1.09	1.78	1.32	0.78	0.97	0.41	0.56	0.59	1.57	2.47	1.28
78.3	1.33	0.35	0.2	0.21	0.6	1.03	0.95	1	0.2	1.94	0.5	0.71	0.65	0.56	0.5	1	0.47	0.63	2.14	1.73	1.04	0.94	1.65	1.17	0.7	0.89	0.35	0.5	0.54	1.41	2.09	1.18
86.81	1.35	0.36	0.21	0.21	0.6	1.03	1	1.01	0.24	2.04	0.5	0.69	0.65	0.61	0.54	0.95	0.45	0.63	2.19	1.62	1.21	1.03	1.6	1.17	0.74	0.9	0.36	0.5	0.55	1.4	2.02	1.17
95.31	1.32	0.34	0.21	0.21	0.6	1.03	0.98	1.02	0.23	1.99	0.51	0.69	0.64	0.61	0.58	0.95	0.41	0.7	2.16	1.55	1.19	1.02	1.63	1.16	0.73	0.89	0.39	0.51	0.55	1.38	1.99	1.17

## Sheet: Fig.3B
MMTV-PyMT WT					MMTV-PyMT BK-KO
ctrl	+ PAX	+ IBTX			ctrl	+ PAX	+ IBTX
1.42	0.85	1.07			0.646667	0.37	0.333333
1.33	0.836667	0.893333			0.18	0.293333	0.0733333
1.37	0.91	0.99			0.1	0.156667	0.196667
1.59333	0.846667	0.863333			0.106667	0.273333	0.98
1.33	0.386667	0.493333			0.306667	0.186667	0.446667
0.61	0.683333	0.643333			0.396667	0.143333	0.47
0.33	0.53	0.576667			0.386667	0.333333	0.27
0.493333	0.276667	0.263333			0.456667	0.166667	0.19
1.14667	0.0566667				0.0966667	0.426667	0.206667
1.33667	0.353333				0.766667	0.566667
0.463333	0.07				0.16	0.523333
1.33667					0.263333	0.696667
0.886667					0.273333
0.763333					0.246667
2.28667					0.246667
1.95333					0.43
0.783333					0.206667
1.62					0.326667
2.98333					0.926667
0.313333					0.63
0.18					0.54
0.49					0.443333
0.433333					0.843333
0.5					0.346667
0.89					0.203333
0.966667					0.296667
1.06333					0.103333
0.986667					0.196667
1.05333					0.196667
0.02					0.5
0.6					0.72
					0.426667

## Sheet: Fig.3C
MMTV-PyMT WT					MMTV-PyMT BK-KO
ctrl	+ PAX	+ IBTX			ctrl	+ PAX	+ IBTX
2.89	1.43	2.11			1.49333	1.18333	1.24333
2.41333	1.43667	1.66667			0.39	0.943333	0.546667
2.62333	1.52333	1.93667			0.226667	0.453333	0.78
3.14667	1.35	2.69667			0.23	0.75	1.7
3.01	0.593333	1.65667			0.656667	0.533333	0.733333
1.02333	0.966667	1.98333			1.1	0.433333	0.84
0.573333	0.76	1.78333			1.04667	0.746667	0.896667
0.79	0.436667	1.01667			1.12667	0.443333	0.79
2.11333	0.243333				0.226667	1.25667	0.96
3.03	0.92				2.12333	1.41333
0.82	0.206667				0.62	1.51
2.52667					0.873333	1.88
1.62667					0.783333
1.45667					0.706667
3.17667					0.593333
3.02667					1.26
1.22333					0.456667
2.10667					0.773333
4.02667					2.40667
0.92					1.79667
0.626667					1.23667
1.08333					1.08667
1.07					1.75333
0.946667					1.33
1.68333					0.776667
1.69333					0.993333
1.81333					0.41
1.78333					0.566667
2.04					0.593333
0.183333					1.56667
2.1					2.45
					1.28667

## Sheet: Fig.3D
	MDA-MB-453 ctrl
Time (min)	Replicate1	Replicate2	Replicate3	Replicate4	Replicate5	Replicate6	Replicate7	Replicate8	Replicate9	Replicate10	Replicate11	Replicate12	Replicate13	Replicate14	Replicate15	Replicate16
1.38	0.68	0.44	0.69	0.51	0.58	0.39	0.55	0.2	0.35	0.65	0.43	0.32	0.21	0.3	1.23	0.38
9.9	0.73	0.46	0.73	0.53	0.6	0.4	0.58	0.18	0.35	0.67	0.43	0.33	0.23	0.33	1.32	0.41
18.41	0.75	0.48	0.76	0.55	0.62	0.42	0.6	0.19	0.37	0.7	0.46	0.36	0.24	0.34	1.47	0.44
26.92	1.01	0.69	1.03	0.74	0.82	0.61	0.81	0.27	0.5	1.01	0.64	0.54	0.35	0.49	2.3	0.65
35.55	1.09	0.73	1.1	0.82	0.91	0.65	0.87	0.29	0.51	1.05	0.7	0.57	0.36	0.49	2.2	0.64
44.07	1.11	0.73	1.13	0.81	0.91	0.66	0.91	0.27	0.5	1.03	0.68	0.57	0.34	0.47	2.18	0.64
52.58	1.34	0.94	1.44	1.11	1.18	0.86	1.15	0.38	0.74	1.49	0.92	0.82	0.44	0.65	2.9	0.88
61.21	1.32	0.91	1.38	1.07	1.17	0.84	1.14	0.38	0.71	1.43	0.9	0.79	0.46	0.65	2.84	0.88
69.72	1.28	0.9	1.38	1.03	1.13	0.83	1.1	0.37	0.73	1.4	0.9	0.77	0.46	0.65	2.72	0.85
78.24	1.06	0.73	1.09	0.79	0.88	0.64	0.89	0.28	0.51	0.93	0.61	0.56	0.35	0.48	2.22	0.68
86.86	1.06	0.74	1.1	0.81	0.9	0.65	0.88	0.31	0.55	0.97	0.63	0.59	0.37	0.5	2.31	0.71
95.38	1.05	0.72	1.08	0.81	0.89	0.63	0.86	0.3	0.54	0.98	0.66	0.6	0.37	0.51	2.35	0.72
	MDA-MB-453 + PAX
Time (min)	Replicate1	Replicate2	Replicate3	Replicate4	Replicate5	Replicate6	Replicate7	Replicate8	Replicate9	Replicate10	Replicate11	Replicate12	Replicate13
1.38	0.69	0.75	0.8	0.68	0.63	0.89	0.42	0.47	0.54	0.41	0.6	0.55	0.87
9.9	0.73	0.79	0.85	0.71	0.64	0.91	0.41	0.45	0.55	0.43	0.68	0.6	0.88
18.41	0.75	0.83	0.89	0.75	0.67	0.96	0.44	0.47	0.57	0.44	0.69	0.62	0.92
26.92	0.99	1.14	1.13	1.04	0.89	1.27	0.55	0.6	0.79	0.61	0.97	0.82	1.26
35.55	1.04	1.2	1.24	1.12	0.98	1.38	0.58	0.62	0.81	0.59	0.99	0.84	1.33
44.07	1.04	1.18	1.25	1.14	0.98	1.35	0.58	0.61	0.79	0.61	0.96	0.8	1.31
52.58	1.64	1.82	2	1.92	1.59	2.16	0.99	1.02	1.27	1.01	1.53	1.37	2.02
61.21	1.64	1.79	1.84	1.83	1.58	2.17	0.97	1.01	1.23	0.95	1.46	1.32	2
69.72	1.61	1.76	1.81	1.84	1.53	2.09	0.97	1	1.21	0.96	1.46	1.31	1.96
78.24	1	1.13	1.23	1.13	0.97	1.36	0.57	0.6	0.86	0.66	0.99	0.87	1.37
86.86	1.04	1.18	1.24	1.18	1	1.41	0.63	0.83	0.89	0.69	1.06	0.91	1.44
95.38	1.04	1.17	1.24	1.2	1	1.41	0.63	0.83	0.9	0.7	1.05	0.92	1.48
	MDA-MB-453 + IBTX
Time(min)	Replicate1	Replicate2	Replicate3	Replicate4	Replicate5	Replicate6	Replicate7	Replicate8	Replicate9	Replicate10	Replicate11	Replicate12
1.38	0.57	0.58	0.67	0.38	0.36	0.48	0.37	0.51	0.52	0.71	0.45	0.49
9.9	0.59	0.61	0.72	0.39	0.36	0.48	0.37	0.55	0.55	0.7	0.49	0.52
18.41	0.62	0.63	0.74	0.49	0.39	0.51	0.4	0.56	0.59	0.74	0.52	0.53
26.92	0.87	0.86	1	0.57	0.54	0.57	0.57	0.79	0.84	1.05	0.73	0.78
35.55	0.92	0.94	1.08	0.59	0.55	0.56	0.57	0.8	0.84	1.1	0.73	0.78
44.07	0.93	0.98	1.11	0.48	0.54	0.54	0.57	0.79	0.87	1.06	0.72	0.75
52.58	1.32	1.41	1.62	0.75	0.85	1.11	0.89	1.2	1.28	1.56	1.01	1.13
61.21	1.29	1.38	1.59	0.86	0.82	1.08	0.85	1.21	1.22	1.56	1.01	1.09
69.72	1.25	1.39	1.55	0.79	0.83	1.1	0.83	1.2	1.22	1.55	1.02	1.09
78.24	0.9	0.95	1.11	0.42	0.52	0.57	0.59	0.81	0.84	1.12	0.79	0.86
86.86	0.93	0.97	1.14	0.48	0.56	0.61	0.61	0.85	0.87	1.16	0.83	0.87
95.38	0.92	1	1.14	0.48	0.59	0.58	0.62	0.85	0.88	1.19	0.82	0.87

## Sheet: Fig.3E
MDA-MB-453
ctrl	+ PAX	+ IBTX
0.72	0.723333	0.593333
0.46	0.79	0.606667
0.726667	0.846667	0.71
0.53	0.713333	0.42
0.6	0.646667	0.37
0.403333	0.92	0.49
0.576667	0.423333	0.38
0.19	0.463333	0.54
0.356667	0.553333	0.553333
0.673333	0.426667	0.716667
0.44	0.656667	0.486667
0.336667	0.59	0.513333
0.226667	0.89
0.323333
1.34
0.41

## Sheet: Fig.3F
MDA-MB-453
ctrl	+ PAX	+ IBTX
1.31333	1.63	1.28667
0.916667	1.79	1.39333
1.4	1.88333	1.58667
1.07	1.86333	0.8
1.16	1.56667	0.833333
0.843333	2.14	1.09667
1.13	0.976667	0.856667
0.376667	1.01	1.20333
0.726667	1.23667	1.24
1.44	0.973333	1.55667
0.906667	1.48333	1.01333
0.793333	1.33333	1.10333
0.453333	1.99333
0.65
2.82
0.87

## Sheet: Fig.3G
	MMTV-PyMT WT ctrl
Time (min)	Replicate1	Replicate2	Replicate3	Replicate4	Replicate5	Replicate6	Replicate7	Replicate8	Replicate9	Replicate10	Replicate11	Replicate12	Replicate13	Replicate14	Replicate15	Replicate16	Replicate17	Replicate18	Replicate19	Replicate20	Replicate21	Replicate22	Replicate23	Replicate24	Replicate25	Replicate26	Replicate27	Replicate28	Replicate29	Replicate30	Replicate31
1.38	14.16	12.62	13.86	16.08	16.3	4.11	2.45	4.24	8.78	18.44	4.43	13.18	8.98	6.64	22.93	21.19	10.81	18.6	25.17	5.3	10.1	7.55	5.81	6.48	9.9	9.23	8.89	8.67	8.67	1.97	1.62
9.89	14.22	13.18	14.05	16.41	16.55	5.23	3.13	6.22	8.59	18.48	4.45	12.66	8.72	6.52	20.07	17.71	7.79	13.76	20.13	3.87	8.59	4.67	3.99	4.32	9.98	9.08	8.95	8.51	8.52	1.98	1.51
18.4	14.14	13.44	14.85	16.57	16.6	4.78	2.87	5.5	8.55	18.77	4.51	12.76	8.7	6.47	19.77	17.92	7.68	13.1	20.17	3.75	8.92	4.68	3.65	4.52	10.13	9.11	9.05	8.8	8.6	1.97	1.5
27.02	5.43	5.3	5.89	6.13	5.99	2.66	1.84	3.62	4.24	11.57	2.83	7.63	5.09	3.61	11.28	11.41	1.52	6.08	8.2	0.19	6.74	0.63	-0.3	0.16	4.13	3.99	4.52	3.25	3.78	0.93	1.19
35.54	5.48	5.58	6.4	6.47	6.51	2.8	1.89	3.9	4.56	12.33	3.09	8.41	5.53	4.33	12.06	10.61	3.09	6.07	10.06	0.56	6.48	1.21	-0.2	0.74	4.34	4.17	4.49	3.86	4.48	0.94	1.12
44.05	5.45	5.68	6.59	6.66	6.56	2.78	2.02	3.79	4.89	12.66	3.14	8.7	5.7	4.52	12.49	10.19	2.74	5.58	9.72	0.15	6.64	0.74	-0.35	0.51	4.47	4.32	4.47	4.04	4.56	0.93	1.07
52.67	21.96	20.41	23.35	25.19	31.3	5.36	3.09	6.71	11.21	21.15	4.91	15.28	8.3	7.76	18.86	18.43	6.33	11.53	17.32	2.81	8.54	2.8	2.1	2.34	12.14	10.66	10.66	11.3	11.82	2.82	1.33
61.18	17.57	20.33	23.24	26.25	29.57	5.8	3.61	6.77	12.6	23.65	5.44	17.12	9.98	9.22	21.05	21.95	8.15	12.92	20.55	3.95	9.1	4.08	3.53	3.78	10.71	9.41	9.88	11.43	12.85	2.67	1.33
69.69	18.78	19.5	22.38	25.48	28.55	6.15	3.63	6.89	13.43	24.27	5.99	18.01	10.82	10	22.52	24.37	9.31	14.7	22.95	4.7	9.6	5.33	4.08	4.73	9.5	8.42	9.04	11.69	12.86	2.65	1.28
78.3	-1.75	2.65	3.59	1.02	2.53	1.22	0.89	2.4	1.03	7.3	1.55	4.47	2.74	1.68	5.92	3.28	-2.43	-1.11	0.51	-2.12	5.26	-2.3	-2.32	-1.69	2.15	1.86	2.43	2.19	2.15	0.72	1.11
86.81	-1.77	2.79	3.88	1.22	2.96	1.36	0.92	2.38	0.97	7.03	1.67	4.52	2.65	1.74	5.89	3.45	-1.2	-0.57	0.79	-1.86	5.55	-2.16	-2.35	-1.68	2.1	1.88	2.41	2.11	2.05	0.67	1.04
95.31	-1.95	2.72	3.58	0.9	2.79	1.25	0.87	2.23	0.76	6.26	1.57	4.07	2.47	1.65	5.62	2.89	-2.28	-1.51	-1.3	-2.1	5.17	-2.48	-2.62	-1.8	2.04	1.8	2.35	2.1	1.98	0.63	1.05
	MMTV-PyMT BK-KO ctrl
Time (min)	Replicate1	Replicate2	Replicate3	Replicate4	Replicate5	Replicate6	Replicate7	Replicate8	Replicate9	Replicate10	Replicate11	Replicate12	Replicate13	Replicate14	Replicate15	Replicate16	Replicate17	Replicate18	Replicate19	Replicate20	Replicate21	Replicate22	Replicate23	Replicate24	Replicate25	Replicate26	Replicate27	Replicate28	Replicate29	Replicate30	Replicate31	Replicate32
1.38	6.93	1.79	0.94	1.04	2.71	5.13	5.05	5.98	0.93	9.08	3.5	3.94	3.95	3.76	2.89	4.98	2.22	5.53	11.22	11.08	7.4	7.41	9.88	8.11	5.33	5.78	2.13	2.59	2.73	9.74	9.2	7.95
9.89	7.13	1.79	0.95	1.08	2.74	6.22	5.94	7.03	1.38	10.56	3.87	3.96	3.83	3.63	2.69	4.91	1.66	2.85	10.31	10.17	5.94	5.98	8.18	8.25	5.31	5.65	2.11	2.63	2.75	9.69	9.01	7.94
18.4	7.07	1.85	0.99	1.1	2.82	5.84	5.66	6.64	1.3	10.27	3.93	4.01	3.89	3.66	2.64	4.93	2.89	4.1	10.15	10.33	6.18	6.18	8.18	8.4	5.27	5.64	2.14	2.53	2.76	9.69	8.92	8.01
27.02	3.04	0.79	0.44	0.5	1.24	2.59	2.75	3	0.68	4.45	2.02	1.85	1.89	1.73	1.3	2.02	1.27	2.88	3.59	4.27	2.47	2.15	3.06	2.1	2.38	2.37	0.53	0.78	0.5	3.44	4.1	2.97
35.54	3.17	0.82	0.47	0.51	1.27	2.63	2.73	2.99	0.7	4.52	2.06	1.98	1.94	1.86	1.41	2.18	1.46	2.19	4.01	4.85	2.57	2.64	3.38	2.03	2.54	2.49	0.4	0.81	0.68	3.58	3.76	3.01
44.05	3.24	0.82	0.5	0.53	1.31	2.6	2.7	3.07	0.69	4.45	2.07	2.01	1.99	1.88	1.44	2.26	1.15	1.65	3.92	4.81	2.52	2.6	3.32	2.39	2.65	2.46	0.34	0.73	0.57	3.57	3.38	3.08
52.67	10.16	2.46	1.32	1.37	3.89	6.64	7.37	7.49	1.09	11.16	4.92	5.83	4.2	3.63	2.7	5.45	2	2.89	11.33	13.95	4.11	6.06	6.51	12.15	5.3	7.18	3.17	2.61	3.49	16.98	14.61	10.18
61.18	11.05	2.59	1.52	1.48	3.64	7.58	7.51	7.6	1.29	13.11	5.08	5.94	4.27	4.12	2.73	6.05	2.57	3.48	12.86	14.29	5.39	7.06	7.83	12.11	6.19	7.7	2.73	2.71	3.14	18.55	15.91	11.98
69.69	11.53	2.74	1.53	1.56	4.02	8.14	7.94	8.11	1.41	13.43	5.36	6.3	4.76	4.53	3.04	6.6	2.97	3.86	14.82	15.47	6.05	7.67	9.09	12.01	6.85	7.92	2.8	2.89	3.45	18.61	16.64	12.33
78.3	1.72	0.47	0.36	0.27	0.69	1.7	1.97	2.15	0.53	2.65	1.51	1.33	1.39	1.28	1.09	1.29	0.19	0.94	0.71	1.93	1.13	1.24	0.84	1.08	1.7	1.51	0.47	0.96	0.67	2.18	2.65	2.02
86.81	1.71	0.45	0.38	0.27	0.71	1.8	2.04	2.15	0.51	3.14	1.49	1.38	1.51	1.27	1.09	1.32	0.32	1.11	1.07	2.46	1.27	1.3	1.12	1.14	1.75	1.46	0.69	1.05	0.74	2.2	2.79	2.01
95.31	1.59	0.44	0.36	0.26	0.7	1.71	1.9	1.94	0.52	2.73	1.45	1.31	1.36	1.22	1.04	1.2	0.18	0.97	1.14	2.13	1.14	0.97	0.83	1.1	1.7	1.44	0.58	0.96	0.59	2.18	2.68	2

## Sheet: Fig.3H
MMTV-PyMT WT					MMTV-PyMT BK-KO
ctrl	+ PAX	+ IBTX			ctrl	+ PAX	+ IBTX
14.1733	6.41	10.41			7.04333	5.59667	6.97
13.08	8.04	9.25333			1.81	6.07	4.31667
14.2533	7.17333	8.48			0.96	2.85	4.82
16.3533	5.59333	12.83			1.07333	3.78333	2.44333
16.4833	2.39667	10.1667			2.75667	2.69333	3.42333
4.70667	4.35333	9.37667			5.73	2.32667	3.85667
2.81667	2.76	10.6433			5.55	3.48	5.40333
5.32	1.43	6.02333			6.55	2.23333	6.35
8.64	2.02				1.20333	6.58667	6.77333
18.5633	5.26				9.97	3.39333
4.46333	3.17				3.76667	6.04
12.8667					3.97	10.1467
8.8					3.89
6.54333					3.68333
20.9233					2.74
18.94					4.94
8.76					2.25667
15.1533					4.16
21.8233					10.56
4.30667					10.5267
9.20333					6.50667
5.63333					6.52333
4.48333					8.74667
5.10667					8.25333
10.0033					5.30333
9.14					5.69
8.96333					2.12667
8.66					2.58333
8.59667					2.74667
1.97333					9.70667
1.54333					9.04333
					7.96667

## Sheet: Fig.3I
MMTV-PyMT WT					MMTV-PyMT BK-KO
ctrl	+ PAX	+ IBTX			ctrl	+ PAX	+ IBTX
19.4367	7.89	11.4867			10.9133	7.32	11.6733
20.08	9.94	10.2467			2.59667	8.33	5.58667
22.99	9.37	10.31			1.45667	4.4	6.30333
25.64	7.27	15.2467			1.47	5.91	3.36
29.8067	4.62	11.24			3.85	6.08	4.06333
5.77	6.95	9.3			7.45333	4.52	5.37667
3.44333	4.66	11.35			7.60667	7.2	7.92667
6.79	2.56	8.60667			7.73333	5	8.96667
12.4133	2.05				1.26333	13.05	9.72
23.0233	7.09				12.5667	6.39
5.44667	-0.29				5.12	11.69
16.8033					6.02333	19.97
9.7					4.41
8.99333					4.09333
20.81					2.82333
21.5833					6.03333
7.93					2.51333
13.05					3.41
20.2733					13.0033
3.82					14.57
9.08					5.18333
4.07					6.93
3.23667					7.81
3.61667					12.09
10.7833					6.11333
9.49667					7.6
9.86					2.9
11.4733					2.73667
12.51					3.36
2.71333					18.0467
1.31333					15.72
					11.4967

## Sheet: Fig.3J
	MDA-MB-453 ctrl
Time (min)	Replicate1	Replicate2	Replicate3	Replicate4	Replicate5	Replicate6	Replicate7	Replicate8	Replicate9	Replicate10	Replicate11	Replicate12	Replicate13	Replicate14	Replicate15	Replicate16
1.38	14.77	10.99	11.93	11.49	9.01	11.15	6.41	5.52	5.34	7.93	12.75	12.11	10.19	6.27	7.17	8.82
9.9	14.65	10.89	12.04	11.38	8.9	11.02	6.45	5.59	5.42	7.96	12.83	12.19	9.89	6.34	7.2	8.87
18.41	14.55	10.85	11.98	11.34	8.92	10.89	6.4	5.55	5.52	7.92	12.85	12.25	9.83	6.42	7.15	8.81
26.92	5.35	3.99	4.4	4.01	3.29	3.87	2.59	2.57	2.18	2.93	4.15	4.88	1.63	2.9	2.75	3.43
35.55	5.21	3.96	4.43	4.04	3.29	3.98	2.55	2.58	2.22	2.96	4.32	4.97	1.79	2.97	2.7	3.37
44.07	5.1	3.9	4.21	3.98	3.2	3.95	2.56	2.57	2.21	2.93	4.28	4.89	1.81	2.89	2.63	3.34
52.58	37.39	24.01	20.17	25.28	19.39	22.32	10.85	9.34	9.78	14.8	25.99	20.45	18.97	7.73	11.01	12.85
61.21	39.07	25.47	22.2	26.67	20.59	25.38	10.12	9.23	9.33	13.95	25.03	19.81	18.34	8.66	11.34	14
69.72	40.89	26.79	23.92	29.15	21.42	25.68	9.46	9.05	8.95	12.93	24.26	19.72	17.75	9.11	11.17	13.31
78.24	3.47	2.88	3.65	3.16	2.3	2.89	2.64	2.97	2.41	3.1	2.34	3.53	0.39	2.68	1.87	2.21
86.86	3.66	3.03	3.82	3.14	2.36	2.92	2.34	2.6	2.2	2.8	2.43	3.4	0.52	2.59	1.78	2.19
95.38	3.46	2.82	3.51	2.84	2.18	2.71	2.22	2.48	2.04	2.57	2.28	3.09	0.22	2.39	1.67	2.04
	MDA-MB-453 + PAX
Time (min)	Replicate1	Replicate2	Replicate3	Replicate4	Replicate5	Replicate6	Replicate7	Replicate8	Replicate9	Replicate10	Replicate11	Replicate12	Replicate13
1.38	12.64	14.33	16.67	15.76	12.66	15.39	9.82	8.31	10.09	9.24	13.43	13.11	17.87
9.9	12.45	14.13	16.69	15.74	12.74	15.53	9.94	8.36	10.07	9.25	13.55	13.24	17.82
18.41	12.37	14.07	16.65	15.81	12.78	15.4	9.91	8.34	10.01	9.41	13.59	13.35	17.75
26.92	4.62	5.26	6.31	6.02	4.71	5.56	4.07	3.26	3.9	4.12	5.27	5.5	6.81
35.55	4.61	5.28	6.36	6.11	4.77	5.6	4.24	3.42	4.03	4.14	5.45	5.79	7.06
44.07	4.73	5.17	6.33	6.14	4.74	5.63	4.26	3.52	3.99	4.12	5.48	5.73	7.12
52.58	28.08	38.49	42.13	38.58	31.03	41.13	21.56	18.71	20.52	17.96	27.01	26.05	33.08
61.21	32.56	42.23	44.57	35.48	36.86	44.41	21.15	18.4	19.9	18.27	26.16	25.27	33
69.72	34.89	45.59	47.97	39.48	39.92	47.52	20.27	17.39	19.28	17.7	25.73	24.47	31.83
78.24	3.16	3.32	4.78	5.19	3.26	3.87	3.97	3.51	2.61	3.62	3.39	4.26	5.07
86.86	3.57	3.76	5.36	5.69	3.7	4.15	3.79	4.33	2.72	3.5	3.63	4.51	5.17
95.38	3.41	3.71	5.14	5.32	3.45	3.91	3.57	3.66	2.64	3.16	3.21	4.15	4.94
	MDA-MB-453 + IBTX
Time(min)	Replicate1	Replicate2	Replicate3	Replicate4	Replicate5	Replicate6	Replicate7	Replicate8	Replicate9	Replicate10	Replicate11	Replicate12
1.38	10.96	13.45	11.98	3.76	8.13	3.2	8.68	10.96	13.09	14.83	11.44	12.02
9.9	10.94	13.37	11.88	2.38	8.2	3.38	8.69	11.08	13.22	14.83	11.01	11.87
18.41	10.84	13.33	11.84	4.52	8.08	3.25	8.69	11.03	13.06	14.73	11.03	11.77
26.92	3.89	5.01	3.94	2.28	2.86	1.4	3.11	4.6	5.46	5.6	4.83	4.43
35.55	3.91	5.08	4.04	2.3	3	1.41	3.24	4.76	5.65	5.76	4.93	4.47
44.07	3.83	5.03	4.14	1.61	2.96	1.32	3.3	4.67	5.59	5.64	4.88	4.42
52.58	32.21	30.73	24.78	5.92	15.76	4.48	17.37	20.19	23.76	24.71	16.74	20.41
61.21	34.44	29.23	31.52	6.65	16.31	4.71	16.42	21.16	22.74	24.81	17.29	19.31
69.72	36.11	33.97	35.34	6.93	16.95	4.98	16.2	21.54	22.54	24.4	17.43	18.78
78.24	2.57	4.18	2.81	2	2.89	1.94	2.11	3.16	4.51	4.47	3.63	3.08
86.86	2.96	4.59	3.38	1.65	2.77	1.54	2.19	3.2	4.57	4.37	3.65	3.04
95.38	2.86	4.28	3.35	1.49	2.59	1.41	2.07	3.05	4.26	4.01	3.42	2.82

[truncated: 6 more sheets: Fig.3K, Fig.3L, Fig.3M, Fig.3N, Fig.3O, Fig.3P]
