# Supplementary material for: mitoBKCa is functionally expressed in murine and human breast cancer cells and potentially contributes to metabolic reprogramming
Source: eLife. 2024 May 29;12:RP92511. doi: 10.7554/eLife.92511 (PMC11136494; doi:10.7554/eLife.92511)
Supplement: Figure 4—figure supplement 1—source data 1. [file elife-92511-fig4-figsupp1-data1.xlsx]

## Sheet: Fig.S4A
MMTV-PyMT WT			MMTV-PyMT BK-KO
2.0 mM GLU	25.0 mM GLU		2.0 mM GLU	25.0 mM GLU
1.88134	2.05389		3.01596	3.52912
2.52734	2.73509		2.07988	2.60731
1.6694	2.14007		3.45503	3.13669
1.73792	3.00173		3.12411	1.91545
2.84215	2.92257		3.24304	1.38328
3.72209	2.03084		2.69701	2.92402
1.8846	4.67431		4.25911	1.71697
2.53795	3.4025		3.76868	1.57555
3.79607	2.86408		5.93364	1.16813
4.58365	8.15955		1.39945	2.13615
2.31584	1.95638		3.1928	2.93924
4.21962	2.85734		5.57765	2.83133
2.1711	3.49806		3.22095	2.53764
1.40955	2.9708		3.48094	2.18231
2.07048	3.20872		8.7961	3.29614
1.06064	6.08305		5.17363	4.09837
2.012	2.40093		4.67166	4.06142
1.63614	1.89059		4.09914	3.0783
2.31952	1.50089		6.37905	1.46736
2.00031	4.28224		1.85289	2.62056
1.76743	2.57817		3.12265	2.28813
2.45228	2.41862		2.52579	2.39715
4.54998	2.98103		3.21945	1.89686
1.95015	3.42415		3.5591	2.57138
5.42304	2.08882		2.07556	3.43667
1.3999	2.47634		1.43441	3.75614
1.97871	3.02302		1.32918	2.3619
1.45797	1.41288		2.0409	3.74667
1.25855	3.38396		2.56422	1.84015
2.06058	3.04899		1.83497	2.2249
2.01399	2.35337		1.40734	2.87576
2.01557	3.28143		3.61498	2.65796
1.62292	3.06523		1.12713	2.33461
1.84298	4.30193		5.91564	1.07891
1.08807	2.51849		1.56216	3.17591
1.95418	2.96266		1.39584	2.05867
0.984666	2.02106		2.90431	2.8349
1.27654	1.9472		4.00505	2.67114
1.6209	2.03999		1.51736	1.58848
1.74235	2.84341		1.00254	4.45419
1.55959	3.79115		1.10968	3.34172
1.79439	3.84299		3.02375	2.13354
1.51956	3.08571		1.11085	4.62639
2.97025	2.25273		1.77074	3.95998
1.46119	2.35293		1.73075	3.96493
2.79617	2.21808		2.01578	3.20006
1.33725	2.90624		1.43997	3.11605
2.11317	2.95024		1.36391	3.20522
1.51477	3.26307		3.45155	1.53627
1.40747	2.39693		2.08617	2.86956
2.61791	2.70244		2.51059	2.63075
2.1696	2.67332		2.49825	1.95017
3.93739	1.99459		1.11985	1.8496
1.01263	2.781		1.54342	1.2878
2.67402	1.89771		2.52032	2.37529
2.74049	3.72118		2.52719	2.96233
1.95372	2.62588		1.94117	2.41279
2.15299	2.62436		7.14216	2.43689
1.99678	2.02616		2.93932	3.4779
3.70741	2.37054		1.66362	2.91749
2.27272	2.4824		1.6154	1.46936
3.61204	3.88004		2.06474	1.32758
3.72225	2.07731		1.70213	3.12031
2.91082	2.13501		1.65788	2.1655
2.72027	2.48762		2.20019	4.39275
2.78396	6.40972		2.14829	4.01772
1.68004	2.15106		3.18145	2.2552
3.09132	3.49115		2.52445	3.33101
1.81621	3.80421		2.73668	2.91355
2.31986	2.86453		1.68605	2.76691
2.68905	3.79817		2.90817	1.49153
2.71715	2.80216		2.21147	3.31824
3.05997	8.17412		1.80282	3.00666
3.68661	9.87503		5.0545	1.23996
2.94874	5.28864		2.35791	2.82663
2.22876	16.5747		2.0456	3.06887
2.19592	2.72834		1.44684	4.62357
2.65827	2.68327		3.48406	2.81699
3.3137	3.11186		3.84235	1.66841
3.15285	4.32522		3.75159	1.88056
3.9746	5.6351		2.59721	1.07445
5.69105	5.18396		3.83924	5.20927
3.46126	4.39628		6.12271	3.18275
2.20975	2.89726		4.09968	2.24041
2.12839	3.24542		3.22449	1.53158
1.92239	2.50848		5.35725	1.47665
1.46869	3.86074		2.40829	1.43669
1.95343	3.05713		3.90839	0.856795
2.20571	3.33857		4.89412	1.29776
2.6912	1.67619		2.19777	1.55458
1.60706	1.26784		3.74762	1.15482
2.25104	0.832521		6.00797	1.05999
2.71952	2.47861		4.77543	1.62844
1.58559	2.86428		4.46039	1.27415
4.83373	2.60725		3.03681	1.43506
1.43439	3.4156		3.1245	2.35147
2.48559	2.06985		5.4266	2.03976
1.7694	1.84896		3.70022	1.65541
4.72021	3.20578		5.17721	2.84103
4.40251	1.45592		4.67686	2.71816
3.35025	2.34301		5.11482	1.53193
2.70487	2.75765		2.23735	4.36153
1.87086	1.87811		3.40658	1.80023
2.25007	2.6799		1.97361	2.08111
2.15389	2.70538		1.7874	1.15989
2.31436	3.32421		2.199	1.84695
2.14736	1.24512		2.541	1.80712
3.23397	2.30833		1.77638	1.70031
1.72128	1.19295		3.40374	2.77474
2.46554	1.51127		2.47757	1.75158
3.99298	1.8775		3.28871	2.3071
2.85752	2.79433		1.8953	1.95941
5.64518	2.455		4.25619	2.15268
4.35406	3.32082		2.39804	3.22452
3.64166	1.20967		1.76151	1.28491
2.12576	1.3619		2.09047	1.16709
1.72491	1.13354		2.813	1.54964
1.12214	1.7217		2.12593	2.61939
0.754704	0.978786		3.30649	1.75053
1.13307	2.11627		2.21283	1.16334
1.14195	1.93823		3.018	1.81372
1.594	1.99173		2.62871	1.37301
1.28146	1.76254		2.42904	1.99001
1.52962	1.11069		3.94345	1.52767
1.26773	2.39487		1.70689	1.43771
1.44225	1.72813		1.56868	1.88489
0.998164	1.3887		1.82571	1.61857
1.09969	1.57379		3.17249	1.61809
1.49376	2.76133		2.93738	1.89884
1.61053	1.82573		2.28536	3.39466
2.63601	1.71212		3.80374	3.76316
2.10503	2.30639		2.42788	1.99658
2.1603	2.9444		2.15211	2.4094
1.43288	2.01236			2.35171
1.60597	2.56292			2.40866
1.36187	2.40018			3.34041
1.43477	2.52791			1.27881
1.49922	1.55279			1.65227
5.1967	3.75206			1.71146
1.50826	3.22333			2.66129
3.92516	0.965934			1.6731
2.31479	1.90307			2.65352
7.08822	1.46034			3.19054
4.91048	2.04159			2.0931
2.10904	1.85515			2.15665
1.85163	1.40987			1.75152
1.38277	3.51348			2.37094
1.79169	1.50554			3.44207
1.39639	3.16747			3.86266
1.18235	1.02486			5.21167
1.71767	2.1666			2.377
1.52424	2.3916			3.65627
1.41738	5.60065			3.48469
1.61408	2.71042			3.22665
1.5625	1.4309			2.82628
1.12032	1.70012			3.27402
2.45227	2.06814			3.39138
2.4703	2.11836			3.27446
1.48282	2.80567			3.44316
2.60253	2.82806			5.29789
1.59987	2.64695			1.4836
1.74958	2.42788			2.18876
2.04388	2.12435			2.79795
1.85599	1.78138
2.14724	2.9202
2.41728	2.22957
2.98267	1.42166
2.14068	2.04525
1.43712	4.33566
2.17625	3.03668
2.5291	2.20519
	2.48298
	2.70205
	2.31179
	1.81391
	3.45525
	2.38685
	2.18096
	3.46446
	2.96181

## Sheet: Fig.S4B
MMTV-PyMT WT				MMTV-PyMT BK-KO
ctrl	+ PAX	+ IBTX		ctrl	+ PAX	+ IBTX
0.094959	0.0337523	0.29353		0.0119053	-0.312444	0.0633951
0.11353	0.0442577	0.293189		-0.0091808	0.14617	0.065981
0.0909825	0.00953552	0.319056		0.021076	0.0233185	0.0701248
0.403102	0.0239011	0.355099		-0.00079695	0.0266898	0.0230366
0.240802	0.0254188	0.38102		0.0229849	0.0354025	0.124739
0.397104	0.0399994	0.343745		0.0284151	0.0471013	0.0637666
0.313515	0.0503079	0.219759		0.0174021	0.0359233	0.101498
0.436841	0.00242291	0.244992		0.0018127	0.0906998	0.0475834
0.340325	0.00077848	0.463765		0.00551316	0.0490608	0.0262479
0.452733	0.0457554	0.388405		0.00180919	0.0333852	0.0992565
0.270494	0.0172931	0.374097		0.0180353	0.0258261	0.0452317
0.190431	0.0272599	0.239413		-0.0116904	0.0745268	0.0874757
0.358695	0.0632902	0.273451		-0.00631633	0.0905097	0.055401
0.469313	0.0265251	0.317539		0.00613768	0.0509995	0.0242171
0.337853	0.0644438	0.290458		0.00884912	0.0434808	0.0700789
0.463077	0.0660981	0.325654		0.0221172	0.0250699	0.0572535
0.181939	0.0424531	0.233251		0.0238191	0.00801171	0.0998416
0.411394	0.0405269	0.1986		0.0171629	-0.00556582	0.0800914
0.0714395	0.0377224	0.393042		0.0014824	0.0232164	0.112205
0.267973	0.0192248	0.395034		0.0356351	0.0354681	-0.0173108
0.409986	0.0178779	0.118751		0.0227916	0.0585708	-0.0109695
0.172125	0.0355023	0.121854		0.0256789	0.0558932	-0.019508
0.249826	0.0244341	0.133517		0.0206053	0.0419296	-0.00745301
0.437656	-0.0140658	0.166796		0.0159093	0.0744045	0.0194249
0.440199	0.0739131	0.172975		0.0354446	0.0198614	0.0325152
0.434948	0.0493575	0.223463		0.019476	0.097977	0.0346727
0.314374	0.0274364	0.187629		0.00999048	0.0170051	0.0310814
0.255266	0.030842			0.0167674	0.0810432	0.0166436
0.287292	0.0113012			-0.0252157	0.0111043
0.288107	0.00272043			0.0177046	-0.182406
0.453706	0.0890161			0.0926328	0.036025
0.337094	0.0268438			0.0324294	0.00059242
0.24404	0.0455991			0.0113447	0.0939792
0.0220234	0.0410314			0.052879	0.0578448
0.0910616	0.0271474			0.0568796	0.0946039
0.078646	0.0772786			0.0611015	0.0658166
-0.0493839	0.082079			0.0584955	0.0292878
0.0112998	0.0683043			0.0842653	0.0284447
0.262396	0.0405787			0.108958	0.0464823
0.37179	-0.002183			0.0748356	-0.0950945
0.0779476	-0.0158408			0.0702511	0.0368642
0.0979564	-0.0133372			0.106629	-0.271961
0.0259559	-0.023648			0.0475459	0.0332401
0.0218301	-0.0329016			0.0495605	0.0805791
0.115147	-0.0200774			0.16624	0.0284447
0.0445344				0.0083712	0.0464823
0.02054				0.0101398	-0.0950945
0.293149				0.0588663	0.0368642
0.260341				0.0490985	-0.271961
0.299353				0.0328636	0.0332401
0.35191				0.0167557	0.0805791
0.376841				0.0742161	0.0464823
0.354605				0.00559129	-0.0950945
0.217				-0.098962	0.0368642
0.433135				-0.091154	-0.271961
				0.00730732	0.0332401
				0.0527787	0.0805791
				0.0130887
				0.124669
				0.0857727
				0.127656
				0.338767
				0.132041
				0.113923
				0.029377

## Sheet: Fig.S4C
MMTV-PyMT WT				MMTV-PyMT BK-KO
ctrl	+ PAX	+ IBTX		ctrl	+ PAX	+ IBTX
0.0738751	0.215546	0.0254416		0.542934	0.18523	0.298204
0.327935	0.281334	0.0273635		0.560216	0.391677	0.241968
-0.00085207	0.137182	0.0709016		0.575311	0.278063	0.30397
-0.00123639	0.38529	0.0307979		0.559939	0.190836	0.0855286
0.00680182	0.387647	-0.0203127		0.592008	0.209189	0.233658
0.383648	0.292597	0.0286942		0.443021	0.191582	0.0902061
0.376866	0.337132	-0.00410647		0.432913	0.186844	0.177573
-0.0816277	0.270689	0.00606986		0.500821	0.25261	0.519155
-0.122009	0.288688	0.0495296		0.485124	0.194249	0.569656
0.0265907	0.298845	-0.0599862		0.547975	0.294829	0.574455
0.295107	0.350803	-0.0115131		0.299783	0.262846	0.274016
0.343412	0.348862	0.0612183		0.431382	0.212264	0.167822
0.10861	0.193784	0.251963		0.307045	0.238939	0.294364
0.215603	0.428232	0.360272		0.297046	0.203941	0.211337
0.0291103	0.228726	0.180004		0.496943	0.301446	0.590382
-0.0851661	0.101833	0.0729802		0.42005	0.245339	0.344981
0.162973	0.324234	0.265823		0.235245	0.183238	0.375666
-0.0117589	0.376896	0.14361		0.27905	0.210571	0.488616
-0.0281672	0.355422	0.378562		0.0245852	0.218473	0.574155
-0.0502718	0.291898	0.151778		0.0544255	0.381836	0.546926
0.00506978	0.230809	0.0931135		0.227237	0.133927	0.554939
-0.0067462	0.296987	0.10098		0.435048	0.131352	0.592561
-0.0403369	0.2486	0.108071		0.14296	0.34745	0.481136
0.00298494	0.2603	0.227733		0.0241028	0.222436	0.503463
-0.0274682	0.317056	0.100732		0.386102	0.118834	0.543605
0.0332723	0.396857	0.38082		0.0590327	0.113442	0.552377
0.0902844	0.455645	0.0954524		0.0823439	0.247279	0.433309
-0.044391	0.267538	0.133633		0.273971	0.178146	0.204975
0.022998	0.22613	0.170452		0.0967781	0.143701	0.539871
-0.0301256	0.0568336	0.209256		0.200476	0.277615	0.0301208
0.339673	0.317207	0.190039		0.0266117	0.229056	0.117857
0.313875	0.341625	0.125483		0.128263	0.219912	0.00714336
0.101156	0.429229	0.140345		0.0705264	0.134232	0.0243533
0.0739348	0.363941	0.0860715		0.443862	0.341811	0.0569608
0.0577268	0.403721			0.0376538	0.290943	0.056139
0.107906	0.439128			0.0473591		-0.0026685
0.321901	0.297333			0.440433		-0.00142193
0.200096	0.271362			0.397865		0.147102
0.102711	0.39868			0.111384		0.0643218
0.0466111	0.356754			0.136925		0.0380339
0.0452303	0.357882			0.15639		-0.0131525
0.0754457	0.378013			0.439283		0.000141375
0.0411751	0.433174			0.0561371		0.00122063
0.0404502	0.259667			0.0383404		0.0200321
0.0457234	0.120157			0.15254		0.0154265
0.0545936	0.293256			-0.0127927
0.0366863	0.410062			0.366843
-0.0114924	0.366665			0.316236
0.02475	0.317885			0.427292
0.0518253	0.288658			0.487347
0.426717	0.384433			0.280246
0.386422	0.306165			0.341652
	0.198197			0.323169
				0.457544
				0.0338156
				0.0247319
				0.00425225
				0.0352178
				-0.00489534
				0.0581294
				0.0751804
				0.0177625
				0.0238247
				0.00595752
				0.00131447
				-0.0321437
				0.320298
				0.288047
				0.351131
				0.280482
				0.314683
				0.238853
				0.204369
				0.0499128
				0.174073
				0.349699
				0.11121
				0.412681
				-0.0248055
				0.298356
				0.20662
				0.094126
				0.0719766
				0.0813226
				0.194451
				0.318567
				0.0837708

## Sheet: Fig.S4D
MDA-MB-453
ctrl	+ PAX	+ IBTX
0.0161184	0.00577795	0.0551767
0.0125334	0.00996739	0.079598
0.0311566	0.00804322	0.0281492
0.0152147	0.00506609	0.0514694
0.01235	0.00498856	0.0527563
0.00996989	0.00952353	0.0494477
0.00847504	0.00622481	0.0576063
0.00787471	0.00622953	0.0105091
0.0147929	0.00571514	0.0525242
0.0119821	0.0028945	0.00247177
0.0769961	0.0230079	-0.0167492
0.0527019	0.0105972	0.0164475
0.0195421	0.0239225	0.00786469
0.0178279

## Sheet: Fig.S4E
MDA-MB-453
ctrl	+ PAX	+ IBTX
0.358899	0.410199	0.310349
0.396196	0.379799	0.358279
0.370133	0.305441	0.323755
0.386815	0.267901	0.197269
0.367854	0.307812	0.19895
0.306721	0.412832	0.34196
0.264598	0.331939	0.260107
0.322924	0.378975	-0.292666
0.355943	0.256336	0.337947
0.169977	0.361324	0.417752
0.328648	0.397796	0.208949
0.207878	0.375845	0.355115
0.220569	0.139055	0.284352
0.29815	0.103852	0.26006
0.32604	0.294373	0.32813
0.0216119	0.276672	0.332792
0.0859896	0.33695	0.399402
0.0982588	0.283128	0.383331
0.131247	0.28271	0.232653
0.207681	0.172641	0.286045
0.337604	0.230515	0.274145
0.34392		0.39786
0.297614		0.304228
0.263309		0.327925
0.236157		0.276778
0.170966		0.189071
0.17486		0.350957
0.279039
0.260052
0.266345
0.328026
0.369879
0.400283

## Sheet: Fig.S4F
MCF-7
ctrl	+BKCa - RFP	+BKCa-DEC - RFP
0.0565684	0.0842226	0.0803561
0.0400702	0.0261386	0.0494006
0.0397763	0.053925	0.0486799
0.0732025	0.0277954	0.0736853
0.0746256	0.0935872	0.0772778
0.0497103	0.0104457	0.0586285
0.0546963	0.0428699	0.105629
0.0335074	0.0121976	0.0555605
0.0175026	0.0433408	0.492412
0.0570063	0.0640852	0.615562
0.0412708	0.0566194	0.0458113
0.0421799	0.00804588	0.0366423
0.0495165	0.0545292	0.0739442
0.0662332	0.0510066	0.0253741
0.0194024	0.0174245	0.257003
0.0287115	0.0280537	0.273479
0.0483377	0.0277884	0.319809
0.0476641	0.0712482	0.192819
0.0115322	0.0963366	0.0959071
0.0110775	0.0234381	0.0223422
0.0586359	0.0295641
0.0161319	0.089604
0.160264	0.0852467
0.0461104
0.0727105
0.0119645
0.0137288
0.019683
0.0731808
0.100368
0.0553459
0.0223921
0.0352033
0.0239382
0.0136198
0.0140775
0.0121334
0.011598
0.0182086
0.0621612
0.0798609
0.133001
0.0249812
0.0253766
0.290004
0.114694
0.0434517
0.0550971

## Sheet: Fig.S4G
MCF-7
ctrl	+BKCa - RFP	+BKCa-DEC - RFP
0.229302	0.00881509	0.0917448
0.0302598	0.139743	0.134391
0.232027	0.571946	0.183783
0.253038	0.11622	0.385383
0.269907	0.0925995	0.0702378
0.239207	0.219103	0.0540572
0.225168	0.151526	0.0309938
0.123244	0.200445	0.0129016
0.189425	0.174341	0.158858
0.248247	0.0702216	0.103081
0.190173	0.104699	0.14091
0.309608	0.0633939	0.0509939
0.343857	0.293111	0.0237804
0.0513895	0.0729805	0.0259007
0.120491	0.358162	0.209476
0.0891143	0.29746	0.140959
0.0962715	0.336633	0.0778349
0.34498	0.0118293	0.0811725
0.354912	0.0228021	0.0841162
0.124167	0.0212143	0.0177915
0.0804261	0.0463242	0.0851393
0.0743822	0.0368204	0.190531
0.323623	0.353583	0.147542
0.17414		0.164221
0.0982273		0.150027
0.243038		0.116425
0.246768		0.167131
		0.197726
		0.188487
		0.0393667
		0.0249173
		0.0139364
		0.0325435
		0.10113
		0.0867149
		0.242701
		0.246753

## Sheet: Fig.S4J
MMTV-PyMT WT				MMTV-PyMT BK-KO
ctrl	+ PAX	+ IBTX		ctrl	+ PAX	+ IBTX
1.19081	1.40271			2.18939	0.975572	0.881365
1.47397	0.972841	1.03992		2.18939	1.01566	1.101
1.10957	1.05833	1.0356		3.45733	0.702436	1.24132
1.26587	0.772196	0.993419		1.10606	0.698767	1.59954
1.51822	1.08567	0.931499		1.02962	1.02487	1.0236
1.56545	1.2038	0.907552		0.711555	0.684649	1.16954
0.932158	0.775991	1.10213		5.53181	0.619423	2.20774
1.04634	0.995534	0.895476		1.26393	0.702879	1.69435
2.18872	1.25655	0.756789		1.10819	0.657247	1.28811
0.815123	1.23779	1.39861		1.39478	0.694652	0.992297
1.33701	1.03727	0.826369		1.1407	0.804016	0.950478
1.27903	0.944735	1.22348		1.25753	0.857159	1.15051
1.23715	0.878348	1.05107		1.59917	0.956481	2.32535
1.02365	1.18825	1.29641		1.443	0.671585	1.36802
1.40854	1.08782	1.04336		1.31039	1.20362	1.21501
1.58864	1.01312	0.942638		1.87375	1.03489	1.24154
1.5054	0.966385	1.22298		1.67912	0.716079
0.882174	0.986617			3.99545	1.10261
1.14223	1.46545			1.69182
1.09162	0.988709			1.47335
				1.46669

## Sheet: Fig.S4K
MMTV-PyMT WT				MMTV-PyMT BK-KO
ctrl	+ PAX	+ IBTX		ctrl	+ PAX	+ IBTX
1.09134	0.307738	1.49754		1.3634	0.374147	1.47973
2.70736	0.695991	1.15835		1.24524	0.340228	0.83376
1.29903	0.622541	1.2122		0.731183	0.308699	1.34218
1.50909	0.664415	1.14093		1.28606	0.33153	1.62985
1.32522	0.848033	1.43337		1.06356	0.262725	1.44058
1.61671	0.512511	1.00139		1.17785	0.497368	1.05358
2.21421	0.832371	1.51528		1.41996	0.476804	1.06073
2.42492	1.05993	1.26616		0.910064	0.416806	1.18057
1.83135	0.792402	0.973808		0.822853	0.641599	1.31762
1.59067	0.578945	1.24762		1.36035	0.844355	1.06754
1.73671	0.548126	1.08296		1.72659	0.614116	1.3327
2.02244	0.930298	1.06746		1.46787	1.17592	1.36166
1.34634	1.28369	1.07225		1.26255	0.658566	0.807935
1.29734	0.815394	1.53253		0.838167	0.524553	0.934174
1.6138	0.795912	1.15552		1.09038	0.397755	0.768205
1.327	1.22481	1.12119		1.06529	0.959886	1.32924
1.23336		1.27254		1.09968	0.739654	1.10734
1.5674		1.03044		1.46194	1.14243	1.05767
1.4591				1.44345	0.660703	1.04251
1.32858				1.292	0.472212

## Sheet: Fig.S4L
MDA-MB-453
ctrl	+ PAX
1.40581	1.14314
1.90282	0.994699
1.45448	1.02559
1.54069	1.0424
1.67694	0.873148
1.96298	0.97971
1.57398	0.970232
1.4285	0.897722
1.37	1.37064
1.87198	0.866485
2.11588	0.828201
2.01999	1.07852
1.97407	0.639704
2.00209	0.946628
1.8451	0.832395
1.72666	0.952393
1.80279	1.03509
1.48754	0.966467
1.86698	0.903573
1.27533	0.67649
2.08904	0.754964
1.131	0.915163
1.99767	0.708741
1.70116	0.817784
1.74483	0.802768
2.462	0.663574
1.96794	0.837079
2.08596	1.04785
2.03527	0.880249
1.96955	1.18359
1.69029	0.837451
2.35417	0.987545
3.22184	0.908048
2.05131	1.01379
2.70661	1.06031
2.4934	1.12163
2.49213	0.819599
2.41324	0.637606
2.7738	0.718273
2.18693	0.894303
	0.919322
	0.749865
	0.904582
