# Supplementary material for: mitoBKCa is functionally expressed in murine and human breast cancer cells and potentially contributes to metabolic reprogramming
Source: eLife. 2024 May 29;12:RP92511. doi: 10.7554/eLife.92511 (PMC11136494; doi:10.7554/eLife.92511)
Supplement: Figure 4—source data 1. [file elife-92511-fig4-data1.xlsx]

## Sheet: Fig.4A
	MMTV-PyMT WT				MMTV-PyMT BK-KO
Time (min)	Average	SD	N (cells)		Average	SD	N (cells)
0	1.31678	0.811807	75		1.7723	1.05846	91
0.0526167	1.30221	0.804472	75		1.76871	1.03458	91
0.1026	1.29117	0.77331	75		1.77288	1.02342	91
0.153033	1.28126	0.784613	75		1.86542	1.13073	91
0.202967	1.27853	0.771417	75		1.85334	1.08658	91
0.253083	1.28574	0.756792	75		1.8914	1.10779	91
0.302933	1.28329	0.738351	75		1.89986	1.09314	91
0.35305	1.27943	0.778834	75		1.89221	1.08695	91
0.402917	1.30064	0.74978	75		1.90712	1.11192	91
0.452917	1.29176	0.756767	75		1.90621	1.10262	91
0.503067	1.29004	0.743577	75		1.87752	1.09493	91
0.553017	1.29054	0.729595	75		1.85427	1.11363	91
0.602967	1.28994	0.721006	75		1.82303	1.10564	91
0.65285	1.29089	0.718672	75		1.8248	1.13424	91
0.703067	1.28942	0.726529	75		1.82727	1.148	91
0.75305	1.28767	0.73493	75		1.83198	1.13383	91
0.80305	1.28835	0.737697	75		1.8473	1.12727	91
0.852933	1.28515	0.730951	75		1.8765	1.0992	91
0.902917	1.29093	0.746141	75		1.90375	1.10517	91
0.952883	1.28387	0.730689	75		1.93282	1.14421	91
1.00295	1.28445	0.736997	75		1.94174	1.11519	91
1.05285	1.29555	0.747773	75		1.9516	1.10318	91
1.10303	1.29375	0.744009	75		1.96756	1.10393	91
1.15302	1.29894	0.745313	75		1.99071	1.10835	91
1.20302	1.29183	0.739126	75		1.98563	1.10153	91
1.2529	1.29378	0.748664	75		1.99615	1.14844	91
1.30297	1.29336	0.742487	75		1.99182	1.11864	91
1.35282	1.28522	0.732939	75		1.97687	1.13013	91
1.40303	1.28504	0.730088	75		1.96887	1.1157	91
1.45293	1.28438	0.741429	75		1.9625	1.10462	91
1.50302	1.28429	0.732173	75		1.94865	1.09882	91
1.55303	1.29479	0.760935	75		1.94145	1.08905	91
1.60288	1.28762	0.742015	75		1.92556	1.09232	91
1.65303	1.28859	0.739319	75		1.91418	1.08246	91
1.70287	1.28122	0.731808	75		1.90365	1.07025	91
1.75305	1.27962	0.71448	75		1.90105	1.07757	91
1.80285	1.28042	0.721701	75		1.88094	1.05639	91
1.85273	1.28333	0.74459	75		1.87734	1.06463	91
1.90288	1.27759	0.753702	75		1.86997	1.07844	91
1.95302	1.26813	0.73048	75		1.85868	1.07392	91
2.00287	1.26688	0.730581	75		1.86925	1.08048	91
2.0529	1.27204	0.736718	75		1.86102	1.08293	91
2.10288	1.27322	0.741153	75		1.84466	1.05821	91
2.15257	1.27152	0.7343	75		1.85274	1.05747	91
2.20297	1.2669	0.727251	75		1.84881	1.09445	91
2.25298	1.26071	0.719356	75		1.84849	1.08939	91
2.30287	1.25691	0.723214	75		1.85487	1.07538	91
2.35298	1.26299	0.732268	75		1.86397	1.10638	91
2.40302	1.25606	0.735864	75		1.85645	1.11391	91
2.45298	1.25699	0.740475	75		1.82645	1.07869	91
2.50288	1.25239	0.742122	75		1.8397	1.13694	91
2.55308	1.25776	0.72961	75		1.83703	1.11335	91
2.60298	1.25624	0.738045	75		1.83428	1.11831	91
2.65265	1.25471	0.733992	75		1.82233	1.10867	91
2.70293	1.23924	0.716187	75		1.81362	1.08972	91
2.75288	1.23792	0.711171	75		1.81286	1.07139	91
2.80292	1.23931	0.729214	75		1.82177	1.10264	91
2.85295	1.24143	0.728485	75		1.82773	1.11295	91
2.90333	1.2425	0.722602	75		1.81165	1.11381	91
2.9531	1.23528	0.727247	75		1.80613	1.10963	91
3.00302	1.23537	0.739696	75		1.81708	1.09518	91
3.05293	1.23846	0.733117	75		1.81177	1.09933	91
3.10292	1.23917	0.74917	75		1.80507	1.13575	91
3.15293	1.24033	0.749083	75		1.81531	1.1329	91
3.20302	1.23473	0.74784	75		1.79914	1.11631	91
3.25312	1.22902	0.743294	75		1.78405	1.11879	91
3.30305	1.22516	0.735653	75		1.7588	1.10166	91
3.35287	1.2239	0.725589	75		1.76725	1.11489	91
3.40293	1.2218	0.743693	75		1.43678	1.29244	91
3.45297	1.21005	0.752483	75		1.29471	1.39506	91
3.50292	0.966412	0.620139	75		1.25408	1.41915	91
3.55295	0.574738	0.523366	75		1.17515	1.37256	91
3.60303	0.493402	0.486529	75		0.594958	0.701232	91
3.65268	0.385196	0.495086	75		0.35764	0.393561	91
3.70288	0.327149	0.465926	75		0.153126	0.182649	91
3.75285	0.27892	0.42389	75		0.0784998	0.110897	91
3.80305	0.240571	0.371638	75		0.0628194	0.101656	91
3.85293	0.203863	0.319595	75		0.0592168	0.107451	91
3.9031	0.17625	0.272764	75		0.0623273	0.115829	91
3.95307	0.149156	0.223335	75		0.0658876	0.11794	91
4.00305	0.126272	0.18372	75		0.0741043	0.120632	91
4.05298	0.112137	0.153964	75		0.0807288	0.121947	91
4.10307	0.0977929	0.129591	75		0.0878809	0.124637	91
4.15295	0.0850651	0.109907	75		0.0944061	0.128672	91
4.20287	0.0761165	0.0942149	75		0.099688	0.131785	91
4.25312	0.0694902	0.0807301	75		0.105564	0.13118	91
4.30307	0.0639542	0.0711494	75		0.108662	0.132411	91
4.3531	0.0613558	0.0641464	75		0.107752	0.133042	91
4.40302	0.0574616	0.059742	75		0.111489	0.135177	91
4.45293	0.055369	0.0580216	75		0.117836	0.137992	91
4.50307	0.0533428	0.0571434	75		0.123319	0.140193	91
4.55302	0.0518431	0.0548526	75		0.127294	0.142131	91
4.60297	0.0515512	0.0555077	75		0.129647	0.144057	91
4.65298	0.0517378	0.0571133	75		0.132826	0.144016	91
4.70292	0.0530398	0.0578397	75		0.135241	0.144859	91
4.75302	0.055383	0.060483	75		0.137033	0.146143	91
4.803	0.0554543	0.0619318	75		0.138736	0.144712	91
4.85295	0.0579023	0.0650159	75		0.142417	0.148997	91
4.9031	0.0580504	0.0656649	75		0.144693	0.147177	91
4.95312	0.0604049	0.0688321	75		0.145856	0.14608	91
5.00308	0.0612992	0.0701852	75		0.149393	0.147436	91
5.05293	0.0620161	0.072973	75		0.151073	0.147582	91
5.1029	0.0622828	0.0732958	75		0.151824	0.147171	91
5.15293	0.0620152	0.0759388	75		0.155753	0.14929	91
5.2031	0.0644064	0.0780521	75		0.156544	0.149357	91
5.25303	0.0667349	0.0813841	75		0.161474	0.14913	91
5.30295	0.0683343	0.0817402	75		0.15936	0.147436	91
5.35303	0.0707487	0.0852922	75		0.163471	0.151223	91
5.4029	0.0711596	0.0860211	75		0.164433	0.149363	91
5.4529	0.0736963	0.0906115	75		0.167325	0.15387	91
5.5029	0.0745172	0.0914338	75		0.170591	0.156917	91
5.5531	0.076914	0.0947447	75		0.17204	0.154966	91
5.60307	0.0799632	0.0975378	75		0.173252	0.156204	91
5.65293	0.0807254	0.100613	75		0.178358	0.159987	91
5.70302	0.0822285	0.101685	75		0.180241	0.158616	91
5.75315	0.0838618	0.105984	75		0.180599	0.159476	91
5.80285	0.0863138	0.108334	75		0.182987	0.160058	91
5.85303	0.0880229	0.111932	75		0.186278	0.163718	91
5.90303	0.0900569	0.114364	75		0.186403	0.16156	91
5.95297	0.0912011	0.11779	75		0.188488	0.163716	91
6.00272	0.0930475	0.12084	75		0.188646	0.163722	91
6.05303	0.0939594	0.122979	75		0.191065	0.162982	91
6.10292	0.095255	0.124407	75		0.19335	0.164592	91
6.15308	0.0979113	0.127613	75		0.19283	0.166447	91
6.20292	0.0982159	0.13042	75		0.19536	0.164942	91
6.25307	0.100889	0.136157	75		0.199568	0.170203	91
6.30297	0.103024	0.13961	75		0.199974	0.171111	91
6.35292	0.104392	0.141898	75		0.201285	0.168225	91
6.4029	0.105207	0.145147	75		0.201636	0.168761	91
6.45312	0.108127	0.149526	75		0.204764	0.169937	91
6.50307	0.109927	0.153422	75		0.20767	0.174197	91
6.55307	0.111699	0.157931	75		0.208904	0.173247	91
6.60293	0.114322	0.162677	75		0.209258	0.171778	91
6.6529	0.116382	0.165086	75		0.212898	0.174686	91
6.70288	0.118276	0.169034	75		0.213122	0.173288	91
6.75292	0.121406	0.173932	75		0.213542	0.173509	91
6.80298	0.121944	0.175666	75		0.214452	0.172782	91
6.85313	0.124531	0.184292	75		0.215952	0.17317	91
6.90312	0.12698	0.187657	75		0.220135	0.179693	91
6.95308	0.128778	0.189794	75		0.221024	0.175207	91
7.00303	0.13211	0.196364	75		0.224224	0.18247	91
7.0529	0.134323	0.198932	75		0.221908	0.177209	91
7.10307	0.135205	0.203792	75		0.225314	0.179207	91
7.15298	0.137795	0.207724	75		0.219693	0.173874	91
7.20295	0.139621	0.21037	75		0.225019	0.178167	91
7.25312	0.140471	0.211453	75		0.223774	0.176532	91
7.30302	0.142578	0.219922	75		0.226655	0.178993	91
7.35303	0.14408	0.222321	75		0.22382	0.17601	91
7.40293	0.145488	0.229197	75		0.226812	0.1771	91
7.45297	0.149341	0.236412	75		0.228568	0.184172	91
7.50295	0.149687	0.23128	75		0.232943	0.187471	91
7.55302	0.152695	0.239862	75		0.238508	0.187414	91
7.60295	0.156008	0.247578	75		0.237012	0.188084	91
7.65302	0.157321	0.252862	75		0.239955	0.188106	91
7.703	0.159958	0.25689	75		0.240457	0.189163	91
7.75292	0.1628	0.264895	75		0.243979	0.193787	91
7.80293	0.1646	0.273485	75		0.245864	0.198761	91
7.85302	0.164131	0.267294	75		0.247523	0.200231	91
7.90298	0.169504	0.273122	75		0.243509	0.193599	91
7.953	0.16849	0.279753	75		0.251159	0.207858	91
8.0029	0.170894	0.282821	75		0.247263	0.199642	91
8.05302	0.170999	0.282463	76		0.246774	0.202591	91
8.10295	0.171194	0.287243	76		0.248766	0.206952	91
8.15312	0.173928	0.28889	76		0.248152	0.201412	91
8.20297	0.176917	0.292862	76		0.248707	0.205777	91
8.25293	0.178024	0.300581	76		0.247954	0.205097	91
8.30292	0.181008	0.308351	75		0.252042	0.211105	91
8.35307	0.180313	0.306896	76		0.251207	0.211026	91
8.40305	0.182444	0.307906	76		0.255083	0.22415	91
8.45297	0.183304	0.315965	76		0.248824	0.205448	91
8.50287	0.186393	0.318061	76		0.255765	0.206895	91
8.55297	0.186709	0.322598	76		0.25412	0.205642	91
8.60293	0.187863	0.319756	76		0.260955	0.21993	91
8.653	0.190839	0.328166	76		0.262015	0.230936	91
8.70288	0.195259	0.328706	76		0.261931	0.219064	91
8.75298	0.196315	0.331347	76		0.258725	0.214656	91
8.80308	0.193366	0.325602	76		0.263175	0.215205	91
8.853	0.196121	0.33355	76		0.265545	0.216354	91
8.90302	0.196617	0.336409	76		0.267026	0.220871	91
8.95303	0.19814	0.33868	76		0.271881	0.229638	91
9.0029	0.197688	0.330015	76		0.269815	0.224297	91
9.05297	0.20044	0.332486	76		0.266003	0.219944	91
9.10302	0.200227	0.327305	76		0.263882	0.221164	91
9.15327	0.202637	0.33112	76		0.268049	0.227317	91
9.2031	0.205417	0.33682	75		0.272371	0.233441	91
9.253	0.204569	0.340759	76		0.275134	0.244012	91
9.30305	0.20295	0.336858	76		0.269679	0.234083	91
9.35308	0.203623	0.343837	76		0.271851	0.234954	91
9.40308	0.207493	0.358844	76		0.277737	0.245002	91
9.45292	0.204909	0.341919	76		0.275858	0.243015	91
9.50292	0.207963	0.35629	76		0.278784	0.247158	91
9.55297	0.207998	0.354289	76		0.277241	0.240285	91
9.60305	0.210438	0.35915	76		0.271066	0.230801	91
9.65292	0.212025	0.367423	76		0.279306	0.242789	91
9.70307	0.214442	0.374624	76		0.273957	0.241696	91
9.75297	0.215499	0.374208	76		0.27154	0.240643	91
9.80297	0.216115	0.377227	76		0.269073	0.236245	91
9.85298	0.218529	0.380883	76		0.267607	0.231588	91
9.90297	0.218516	0.3838	76		0.259757	0.225163	91
9.9529	0.218676	0.378962	76		0.255613	0.228989	91
10.003	0.217699	0.382047	76		0.262757	0.233213	91

## Sheet: Fig.4B
MMTV-PyMT WT				MMTV-PyMT BK-KO
ctrl	+ PAX	+ IBTX		ctrl	+ PAX	+ IBTX
1.67781	1.79686	1.00902		2.38829	2.38382	2.05404
1.77356	2.32038	1.03594		2.6122	2.39252	0.054812
1.39256	2.30374	0.350736		2.02682	1.95878	0.984931
1.14711	2.24236	0.855625		1.72311	1.98474	2.35989
0.609353	1.29688	0.927799		1.40868	1.12868	1.97574
0.873417	1.80378	2.14471		1.16909	1.07077	1.30998
0.800669	1.55584	1.94251		1.10038	1.29184	3.64716
1.41399	1.5779	0.406127		1.87935	1.1129	2.50321
2.20987	1.05878	1.69178		1.43058	2.22167	1.39671
0.945357	2.54987	1.40039		0.991508	1.83255	1.96384
0.571278	2.52463	1.98937		#DIV/0!	1.80377	1.0467
0.85641	1.41173	2.01259		1.11583	2.07699	1.74998
1.83338	0.94536	0.911461		1.92431	2.17724	0.847855
1.60212	2.58398	1.94699		2.40977	1.42026	1.81735
1.8698	1.47355	0.829839		1.74573	2.57209	0.257453
1.16303	1.59984	0.417027		2.41161	1.76586	1.8397
2.43227	1.39219	1.35193		2.62923	2.70907	2.00527
1.55393	1.89158	1.65442		2.33538	1.73001	3.54949
1.3007	2.18146	0.948285		1.75887	1.7471	2.20022
1.33266	1.96454	1.37032		2.8153	1.98091	1.65936
0.901606	1.80312	1.13058		0.97984	2.17252	2.22923
0.530442	1.51643	1.43751		2.19236	1.64949	1.65688
0.981728	2.21806	0.972472		1.26647	1.42409	0.139618
0.716269	2.23388	1.64032		2.24415	2.92361	4.29312
1.31669	1.43077	2.29762		2.53733	1.29883	11.2726
1.94922	1.09465	1.78124		1.76471	1.32726	2.39104
1.06662	1.56089	1.40478		2.99273	1.04974	1.08317
0.865408	0.987676	1.47687		2.54223	2.51422	2.45338
1.51898	2.13363	1.32894		2.56196	1.30529	4.23722
0.584418	2.60112	1.83318		1.84022	0.73006	3.97742
0.914405	1.03581	1.5176		2.99526	0.982849	3.20519
0.897116	2.14707	1.54517		5.36277	2.00566	3.21678
0.537607	0.730971	0.725784		3.29266	1.36137	3.11598
0.915625	1.75249	0.531861		5.17759	0.501308	3.22042
0.667345	2.17142	1.79963		1.6622	1.47651	1.88703
0.784134	1.98398	1.41046		1.66939	1.71738	3.21538
1.40975	1.79192	1.91953		4.40812	1.83741	3.44519
1.09985	2.6896	1.46297		2.89968	1.84637	2.37386
1.43492	1.36954	0.756425		3.59324	1.58359	3.26123
1.32379	1.13496	0.648706		2.96703	1.51607	2.23796
1.8659	2.10181	1.86798		5.60553	1.6641	4.07983
0.911247	0.895336	1.7953		4.65574	1.27577	3.0602
0.859426	1.65677	1.50135		4.05379	1.78269	3.24873
0.67907	2.00862	0.987148		1.92584	1.18548	4.51653
0.791563	1.10049	0.838137		2.06776	1.48922	1.26437
2.33854	1.42229	0.913176		3.44406	1.78038	3.611
2.98452	1.09455	1.78875		2.41797	1.93138	2.83254
0.940148	1.00406	1.01273		2.50066	0.968403	3.86845
3.43303	1.19039	0.986148		0.937619	5.20232	3.73682
2.41276	1.06673	0.737277		0.673437	3.60506	1.97514
5.13225	1.39657	1.98969		0.856355	1.61608	1.1987
1.71696	1.16415	1.28639		0.85875	2.18627	1.69312
2.65001	1.35667	1.01657		1.58188	1.30526	1.22054
1.07472	0.971768	0.679744		0.177589	1.0329	1.1827
0.720316	0.925517	1.69724		1.32768	1.19802	1.2174
0.912888	1.7147	2.30176		1.02911	2.01671	0.89497
1.02218	0.851901	1.49057		1.06475	3.84365	1.9388
0.764919	2.15325	1.44014		1.52424	1.52198	1.05873
1.2665	0.927695	1.37659		1.11357	2.62164	1.37417
1.31438	1.52172	1.65382		1.60145	2.7586	1.52923
0.933499	2.41635	1.30751		1.40142	4.61291	1.07499
0.856057	1.69095	0.865303		0.83013	2.14841	2.38
0.805845	1.68729	1.95257		0.579296	2.29367	1.48678
1.04417	0.807587	1.69942		0.972341	2.46135	1.45914
0.737648	2.01691	1.18834		1.0145	3.12758	1.22947
1.33414	1.60831	2.04482		0.960255	1.97691	1.26748
0.99455	3.33501	0.828317		1.1537	1.51496	1.22629
1.43479	1.0407	2.11294		0.717213	1.86856	2.69499
1.21776	2.9793	1.19946		0.614768	0.897863	1.26074
0.808179	2.59484	1.23814		2.06896	2.07172	0.779897
0.922783	1.51656	1.47134		0.841503	1.93284	1.57694
0.71306	1.0196	1.71352		1.08709	1.98072	0.823474
0.905922	1.9592	2.34624		1.62407	2.40879	2.02096
0.862398	3.56108	1.08951		0.756671	3.24667	2.03257
0.599466	0.95364	1.0682		0.983262	1.97704	1.22717
	1.41802	1.24878		1.33458	1.12964	2.43125
	2.24907	0.88309		2.9901	1.31364	1.47246
	2.66483	1.59185		1.76896	1.85223	2.82938
	1.72897	0.903874		1.66695	1.17656	1.25595
	2.46887	1.49241		0.907606	1.48686	2.08675
	1.28672	1.84856		1.33049	1.1434	1.41562
	1.19743	0.537254		1.22664	3.1341	1.42483
	2.40555	1.7561		0.937143	2.63217	1.25028
	2.4026	0.997227		0.97911	3.18514	1.89256
	3.10885	0.773007		0.930677	3.59013	2.25481
	0.922283	1.3323		1.86692	3.06874	2.30321
	1.13164			1.88279	2.20618	1.70041
	0.864012			1.0677	1.54149	1.71054
	1.67835			1.4715	1.88133	0.869226
	2.34973			2.03769		1.88346
				1.44606		1.3973
				1.04978		1.57491
						1.51029
						2.21629
						1.37678
						1.42681
						1.3565
						0.877737
						1.74744
						1.131

## Sheet: Fig.4C
	MDA-MB-453 ctrl				MDA-MB-453 + PAX				MDA-MB-453 + IBTX
Time (min)	Average	SD	N (cells)		Average	SD	N (cells)		Average	SD	N (cells)
0	0.384137	0.278099	113		0.603813	0.307056	97		0.470005	0.255439	103
0.0502167	0.395055	0.273089	113		0.610041	0.303059	97		0.476686	0.250697	103
0.100188	0.403042	0.270169	113		0.613491	0.298197	97		0.479445	0.245128	103
0.150095	0.40802	0.267582	113		0.615395	0.293945	97		0.483788	0.243217	103
0.200233	0.411787	0.261552	113		0.616455	0.294226	97		0.487054	0.242725	103
0.25094	0.41669	0.258246	113		0.615552	0.292658	97		0.494202	0.239131	103
0.300175	0.417876	0.253748	113		0.615412	0.288068	97		0.496313	0.238036	103
0.350128	0.422124	0.254894	113		0.616218	0.288232	97		0.497196	0.236487	103
0.400118	0.422746	0.255051	113		0.615265	0.285926	97		0.496512	0.234589	103
0.450057	0.427141	0.255368	113		0.61688	0.289585	97		0.495001	0.233173	103
0.500228	0.428822	0.252774	113		0.615069	0.287013	97		0.494155	0.23248	103
0.550103	0.42929	0.251894	113		0.612141	0.281509	97		0.49441	0.231984	103
0.600007	0.433627	0.253587	113		0.61414	0.285031	97		0.495054	0.230408	103
0.650162	0.43304	0.252385	113		0.612672	0.282292	97		0.495859	0.229769	103
0.700132	0.431712	0.250646	113		0.610725	0.283085	97		0.498441	0.230916	103
0.750137	0.430444	0.248504	113		0.611873	0.283805	97		0.497468	0.230447	103
0.800225	0.437213	0.252295	113		0.610501	0.283262	97		0.495956	0.230075	103
0.850147	0.434582	0.250285	113		0.610902	0.285015	97		0.494325	0.228894	103
0.90002	0.432143	0.249398	113		0.608461	0.283445	97		0.49327	0.228533	103
0.950255	0.43198	0.248791	113		0.606543	0.280998	97		0.492048	0.228406	103
1.00023	0.4365	0.249036	113		0.608439	0.284969	97		0.493425	0.228986	103
1.05021	0.434691	0.246372	113		0.606434	0.282815	97		0.497719	0.228929	103
1.10014	0.435123	0.247583	113		0.603134	0.280385	97		0.497602	0.227895	103
1.15024	0.432624	0.245518	113		0.605629	0.285983	97		0.495976	0.226471	103
1.20024	0.434507	0.243996	113		0.605339	0.284233	97		0.495113	0.226811	103
1.25022	0.436191	0.242851	113		0.604311	0.284457	97		0.493717	0.227108	103
1.30005	0.433854	0.242473	113		0.605674	0.287899	97		0.492439	0.227152	103
1.35001	0.431409	0.241841	113		0.603369	0.285216	97		0.489766	0.226433	103
1.40001	0.435268	0.243858	113		0.604671	0.288146	97		0.48874	0.226966	103
1.45002	0.436483	0.245539	113		0.603912	0.287935	97		0.491946	0.226786	103
1.50006	0.434375	0.242304	113		0.602007	0.288675	97		0.49154	0.22722	103
1.55013	0.431335	0.240038	113		0.602978	0.292905	97		0.488287	0.227199	103
1.60025	0.433071	0.241523	113		0.601294	0.290293	97		0.485771	0.226567	103
1.65	0.435392	0.243034	113		0.599766	0.291849	97		0.482982	0.226809	103
1.70019	0.433032	0.242744	113		0.600413	0.295785	97		0.481384	0.226782	103
1.75003	0.431604	0.239796	113		0.598988	0.296024	97		0.479298	0.227195	103
1.80027	0.434205	0.240607	113		0.596092	0.292571	97		0.477264	0.227847	103
1.85007	0.43268	0.240628	113		0.59831	0.296529	97		0.480966	0.226177	103
1.90014	0.430045	0.239416	113		0.596162	0.294328	97		0.480861	0.226458	103
1.95005	0.429268	0.239763	113		0.595303	0.294806	97		0.478718	0.227498	103
2.00008	0.430936	0.238076	113		0.595898	0.295733	97		0.476186	0.227152	103
2.05013	0.430364	0.237452	113		0.594174	0.293932	97		0.47361	0.228195	103
2.1002	0.42727	0.237259	113		0.593362	0.292101	97		0.47264	0.228123	103
2.15011	0.42784	0.239368	113		0.592956	0.294097	97		0.469614	0.227619	103
2.20017	0.429874	0.241216	113		0.592055	0.289864	97		0.47233	0.227347	103
2.25013	0.427785	0.239713	113		0.593943	0.29467	97		0.471948	0.22631	103
2.30017	0.424917	0.238151	113		0.59269	0.292859	97		0.469494	0.227366	103
2.35011	0.425318	0.23951	113		0.589787	0.29036	97		0.467652	0.226379	103
2.40002	0.426054	0.238939	113		0.59068	0.293606	97		0.466443	0.227467	103
2.45019	0.423587	0.238875	113		0.586945	0.291176	97		0.464321	0.228047	103
2.50003	0.421829	0.238941	113		0.583709	0.288106	97		0.461476	0.22687	103
2.55017	0.427742	0.240651	113		0.585631	0.292439	97		0.459997	0.228471	103
2.60005	0.424591	0.239395	113		0.581547	0.289425	97		0.457116	0.22874	103
2.65024	0.421727	0.238157	113		0.582018	0.290614	97		0.460846	0.225439	103
2.70002	0.419127	0.236434	113		0.582009	0.291527	97		0.460959	0.225887	103
2.75005	0.423971	0.241248	113		0.579354	0.290318	97		0.459039	0.224209	103
2.80016	0.422361	0.237693	113		0.580976	0.293741	97		0.457166	0.225644	103
2.85023	0.419234	0.236436	113		0.578699	0.29167	97		0.454725	0.225769	103
2.90027	0.419597	0.238643	113		0.575393	0.287576	97		0.452397	0.226061	103
2.95017	0.419729	0.239318	113		0.577059	0.292124	97		0.44983	0.227359	103
3.00021	0.416654	0.238483	113		0.575461	0.291279	97		0.44895	0.228245	103
3.05012	0.415707	0.23583	113		0.573165	0.290537	97		0.451918	0.228787	103
3.10022	0.417692	0.236807	113		0.57484	0.294935	97		0.451871	0.226822	103
3.15006	0.4183	0.238949	113		0.57326	0.293626	97		0.451614	0.225653	103
3.2002	0.413904	0.235612	113		0.570848	0.294108	97		0.448955	0.226186	103
3.25	0.411881	0.235829	113		0.573612	0.298828	97		0.4469	0.226604	103
3.30021	0.40967	0.235536	113		0.570486	0.297248	97		0.446412	0.227158	103
3.35005	0.414141	0.23852	113		0.567488	0.2952	97		0.446249	0.228056	103
3.40015	0.413316	0.234024	113		0.568472	0.29528	97		0.444145	0.226	103
3.45022	0.414038	0.236025	113		0.564104	0.293942	97		0.443219	0.225117	103
3.50014	0.41098	0.237145	113		0.554452	0.284043	97		0.439624	0.22385	103
3.55026	0.411889	0.237947	113		0.557229	0.28435	97		0.438417	0.223382	103
3.6	0.409857	0.23747	113		0.555115	0.283231	97		0.434472	0.222768	103
3.65024	0.39787	0.225829	113		0.556088	0.285184	97		0.418748	0.223795	103
3.70023	0.364806	0.222942	113		0.551503	0.283501	97		0.408336	0.226309	103
3.75017	0.347283	0.223928	113		0.545615	0.280687	97		0.405703	0.227167	103
3.80021	0.338839	0.220399	113		0.50188	0.273694	97		0.375507	0.242828	103
3.85015	0.32364	0.209823	113		0.402568	0.258972	97		0.360777	0.256482	103
3.90006	0.308671	0.204515	113		0.320305	0.274083	97		0.337376	0.251725	103
3.95019	0.296551	0.206101	113		0.279495	0.256761	97		0.320215	0.237096	103
4.00003	0.27549	0.211236	113		0.241473	0.206542	97		0.309527	0.246805	103
4.0502	0.25908	0.216148	113		0.212438	0.162201	97		0.318967	0.23795	103
4.10004	0.248652	0.222761	113		0.195995	0.139567	97		0.330555	0.242132	103
4.15001	0.241407	0.223043	113		0.182649	0.132676	97		0.316774	0.223984	103
4.20013	0.238171	0.219915	113		0.181523	0.12594	97		0.31236	0.220533	103
4.25008	0.232831	0.216303	113		0.185222	0.117184	97		0.262006	0.180164	103
4.30024	0.228379	0.212763	113		0.180636	0.1095	97		0.203693	0.173174	103
4.35008	0.218823	0.204647	113		0.178469	0.107701	97		0.178759	0.179982	103
4.40021	0.207604	0.196686	113		0.155741	0.097208	97		0.163358	0.184383	103
4.45019	0.197239	0.18904	113		0.144498	0.0916179	97		0.155578	0.183482	103
4.50009	0.185391	0.178623	113		0.134291	0.0881418	97		0.147087	0.1816	103
4.55026	0.171041	0.166033	113		0.124121	0.0838926	97		0.141882	0.177395	103
4.6002	0.158068	0.1553	113		0.0919832	0.0716593	97		0.139794	0.172843	103
4.65014	0.146626	0.14662	113		0.0788827	0.0704542	97		0.138648	0.16752	103
4.70011	0.134565	0.138702	113		0.068642	0.0692781	97		0.139319	0.161828	103
4.75021	0.125448	0.130843	113		0.0656812	0.065574	97		0.140521	0.156524	103
4.80025	0.11795	0.123486	113		0.0664487	0.0596559	97		0.139924	0.152176	103
4.85006	0.109861	0.116971	113		0.0654602	0.0578056	97		0.139943	0.150952	103
4.90017	0.102672	0.110963	113		0.0609881	0.0550515	97		0.143089	0.152338	103
4.9501	0.097259	0.104875	113		0.0571197	0.0547336	97		0.142359	0.15176	103
5.00021	0.0918054	0.0992038	113		0.0534128	0.0529957	97		0.140638	0.149046	103
5.05016	0.0860414	0.0928966	113		0.0495132	0.0514624	97		0.138317	0.146861	103
5.1001	0.0805199	0.087736	113		0.0483692	0.0513732	97		0.135048	0.141716	103
5.15004	0.0774263	0.0836411	113		0.0470305	0.0495057	97		0.129543	0.129822	103
5.20001	0.073926	0.0787985	113		0.0478978	0.0509926	97		0.11967	0.112966	103
5.25013	0.0706981	0.07485	113		0.0469992	0.050071	97		0.107332	0.0962413	103
5.3002	0.0681986	0.0720251	113		0.0473377	0.0512054	97		0.0978867	0.0835945	103
5.35024	0.0659409	0.0695067	113		0.0472286	0.0508211	97		0.090558	0.0751545	103
5.40026	0.0639109	0.0670579	113		0.0467744	0.0507985	97		0.0855204	0.0693735	103
5.45008	0.0618861	0.0653364	113		0.047553	0.0519354	97		0.0804034	0.0656237	103
5.50015	0.0609652	0.0645567	113		0.0475256	0.0509156	97		0.0759575	0.0626173	103
5.55006	0.0593931	0.0638084	113		0.0482415	0.0523374	97		0.072168	0.0607343	103
5.60016	0.0581354	0.062479	113		0.0479255	0.0521419	97		0.0694039	0.059546	103
5.65007	0.0576299	0.0626168	113		0.0477832	0.0511629	97		0.0679314	0.0584545	103
5.7	0.0568669	0.0624861	113		0.0484172	0.0521718	97		0.0662913	0.0586447	103
5.75034	0.0553921	0.0619543	113		0.0483364	0.0512853	97		0.0650846	0.0584495	103
5.80013	0.0547228	0.0605469	113		0.048734	0.0509266	97		0.0639302	0.0586158	103
5.85	0.0491624	0.0606387	113		0.0489018	0.0517565	97		0.0628115	0.0590658	103
5.90002	0.049163	0.0618942	113		0.0488488	0.0512371	97		0.0624291	0.0592631	103
5.95003	0.0476752	0.0619151	113		0.0496964	0.0518254	97		0.0618113	0.0598482	103
6.00021	0.0488486	0.0605458	113		0.0498118	0.0512807	97		0.0623336	0.059789	103
6.05023	0.048567	0.061372	113		0.0496994	0.0502813	97		0.0619907	0.059778	103
6.10015	0.0473591	0.0618556	113		0.0506389	0.0511833	97		0.0620965	0.0610932	103
6.15007	0.0458912	0.0616846	113		0.0504547	0.0497355	97		0.0619686	0.0616583	103
6.20019	0.0476472	0.0616317	113		0.0507314	0.0512556	97		0.061485	0.0613799	103
6.25023	0.0475099	0.0618172	113		0.0508681	0.0503146	97		0.0613577	0.0620396	103
6.30018	0.0467981	0.061962	113		0.0511592	0.0497434	97		0.0612525	0.0626037	103
6.35004	0.0457245	0.061745	113		0.0520093	0.0511006	97		0.0619751	0.0628282	103
6.40006	0.0473258	0.0614006	113		0.0509656	0.0498524	97		0.0619079	0.0630149	103
6.45021	0.0467443	0.0613302	113		0.0516777	0.0512242	97		0.0619864	0.0633634	103
6.50015	0.045852	0.0614187	113		0.0517428	0.0496311	97		0.0618316	0.0633891	103
6.55014	0.0452188	0.0613911	113		0.0520195	0.0486239	97		0.0617889	0.0634443	103
6.60006	0.0466624	0.0611385	113		0.0530024	0.0501359	97		0.0615299	0.0641549	103
6.65022	0.0453538	0.0607905	113		0.0525327	0.0493066	97		0.0610623	0.0639632	103
6.70009	0.0444971	0.0608641	113		0.0536271	0.050291	97		0.0613021	0.0638948	103
6.75016	0.0455456	0.0621829	113		0.0536366	0.0499103	97		0.0615805	0.0641257	103
6.80011	0.0465094	0.0613018	113		0.0537047	0.0489369	97		0.0619187	0.0640376	103
6.85015	0.045434	0.061176	113		0.0548726	0.0504508	97		0.0616702	0.0645327	103
6.9001	0.0442951	0.0612515	113		0.054866	0.0497372	97		0.0616282	0.0644061	103
6.95017	0.0461976	0.0615635	113		0.0504686	0.0449659	97		0.0619353	0.0643687	103
7.00021	0.0459958	0.0610557	113		0.0519395	0.0457551	97		0.061755	0.0648062	103
7.05015	0.0448217	0.0607343	113		0.046671	0.0453681	97		0.0617038	0.0651428	103
7.10006	0.0448977	0.0621861	113		0.0468037	0.0455226	97		0.0622963	0.0644174	103
7.15003	0.0446707	0.0613806	113		0.0476152	0.0463413	97		0.0622467	0.064481	103
7.20026	0.0448772	0.0605344	113		0.0466006	0.0462748	97		0.061727	0.0644105	103
7.25025	0.0456293	0.0620726	113		0.0490218	0.0455846	97		0.0617689	0.0642329	103
7.30017	0.0441187	0.062428	113		0.047823	0.0463037	97		0.0619978	0.0647176	103
7.35008	0.0441032	0.0612834	113		0.046971	0.0472891	97		0.0624101	0.0642315	103
7.40027	0.0448074	0.0618627	113		0.0489844	0.0463315	97		0.062852	0.0637544	103
7.45021	0.0448844	0.0620151	113		0.0477274	0.0461533	97		0.0632608	0.0647216	103
7.5001	0.043945	0.0623159	113		0.0468244	0.0470951	97		0.0628417	0.0648392	103
7.55027	0.044712	0.062661	113		0.0488887	0.0464883	97		0.0628722	0.0652266	103
7.60001	0.0446302	0.0617778	113		0.0479058	0.0473752	97		0.0627353	0.0656505	103
7.65021	0.0433551	0.0619491	113		0.0495716	0.0469865	97		0.0622869	0.0651817	103
7.70003	0.0444022	0.0625165	113		0.04896	0.046897	97		0.0626035	0.0663349	103
7.75002	0.0441182	0.0619043	113		0.0475987	0.0479263	97		0.0633308	0.0654927	103
7.80016	0.0441403	0.06075	113		0.0499004	0.0473159	97		0.0638018	0.0656306	103
7.8502	0.0440085	0.062443	113		0.0490428	0.0484002	97		0.0629433	0.0652889	103
7.90022	0.0434371	0.062475	113		0.0478949	0.0500694	97		0.0631915	0.0654977	103
7.95017	0.0434237	0.061846	113		0.0497425	0.0493692	97		0.0634875	0.0666146	103
8.00004	0.0447914	0.0622427	113		0.0493586	0.0503662	97		0.0632102	0.0665749	103
8.05015	0.043529	0.062082	113		0.0483482	0.0512312	97		0.0628353	0.0661972	103
8.10005	0.0420596	0.0621848	113		0.0504775	0.0501015	97		0.0633912	0.0660336	103
8.15002	0.0428641	0.0629333	113		0.0494787	0.0520471	97		0.0637629	0.0660811	103
8.20001	0.0439665	0.0623727	113		0.0503394	0.0523461	97		0.0642055	0.0663308	103
8.2502	0.0424136	0.0620963	113		0.0506359	0.0515047	97		0.0639833	0.0663851	103
8.30021	0.0406613	0.0624564	113		0.0501659	0.0530945	97		0.063713	0.0666575	103
8.35006	0.0378842	0.0571458	113		0.0526692	0.0530414	97		0.0636876	0.0662141	103
8.40003	0.0369506	0.0574246	113		0.0511442	0.0543613	97		0.0635434	0.066961	103
8.45008	0.0352737	0.0574309	113		0.0500747	0.0543052	97		0.064301	0.0669871	103
8.50026	0.0374219	0.0590977	113		0.0523958	0.0542004	97		0.0646255	0.0666878	103
8.55016	0.037714	0.0579642	113		0.0517088	0.0555619	97		0.0652242	0.0669859	103
8.60013	0.036222	0.0571625	113		0.0505516	0.0579971	97		0.0646416	0.0673998	103
8.65009	0.0343374	0.0571187	113		0.0524708	0.0557434	97		0.0644716	0.0672737	103
8.70011	0.0346553	0.0587419	113		0.0513134	0.0575232	97		0.0645018	0.0673318	103
8.75005	0.0358871	0.0580354	113		0.0522533	0.0580998	97		0.0647373	0.06831	103
8.80002	0.0354192	0.0573107	113		0.0523983	0.0587617	97		0.0646752	0.0685398	103
8.85022	0.0333294	0.0575145	113		0.0514084	0.0592918	97		0.0652237	0.0677472	103
8.9001	0.0341271	0.0589511	113		0.0534698	0.0581184	97		0.0661137	0.0685868	103
8.95003	0.0329795	0.0583586	113		0.0524271	0.0599751	97		0.0658793	0.068038	103
9.00014	0.0331162	0.0575723	113		0.0514996	0.0616131	97		0.0661868	0.0692633	103
9.05011	0.0309813	0.0578527	113		0.053808	0.061242	97		0.0662258	0.0694342	103
9.10021	0.031216	0.0592238	113		0.0524134	0.0611315	97		0.066144	0.0699299	103
9.15019	0.0323588	0.0582055	113		0.05176	0.0627063	97		0.0662897	0.0702614	103
9.20023	0.0314805	0.0574691	113		0.0539341	0.0630921	97		0.0659674	0.070289	103
9.25009	0.0315297	0.0591505	113		0.0528792	0.0640105	97		0.0673463	0.0698603	103
9.30017	0.0312293	0.0588351	113		0.05328	0.0644202	97		0.0677153	0.0703195	103
9.35014	0.0306323	0.0583074	113		0.0535943	0.0632391	97		0.0675517	0.0706004	103
9.40013	0.0312204	0.0585708	113		0.0529244	0.0649869	97		0.0670285	0.070555	103
9.45007	0.0299846	0.0590342	113		0.054578	0.0642107	97		0.0671244	0.0711135	103
9.50021	0.0305926	0.0590095	113		0.0537645	0.0651841	97		0.0672456	0.0711554	103
9.55015	0.0296205	0.0579074	113		0.0532092	0.0654115	97		0.0672672	0.0716374	103
9.60018	0.0310889	0.0590715	113		0.0547821	0.065588	97		0.0669185	0.071805	103
9.65006	0.0307051	0.0586826	113		0.0539032	0.0662081	97		0.06828	0.0713111	103
9.70022	0.0301641	0.0590118	113		0.0527417	0.0674603	97		0.0686488	0.0717582	103
9.75012	0.029246	0.0585421	113		0.0540014	0.0672533	97		0.0688235	0.0720069	103
9.80007	0.0289682	0.0582515	113		0.0528411	0.0675281	97		0.0683887	0.0716113	103

## Sheet: Fig.4D
MDA-MB-453
ctrl	+ PAX	+ IBTX
0.576794	0.571168	0.279891
0.178312	0.637618	0.368672
0.339996	1.06144	0.542721
0.15987	0.482143	0.641121
0.607722	0.522707	0.432691
0.406613	0.551511	0.275332
0.415397	1.11118	0.710389
0.0472901	0.382566	0.337609
0.136639	1.60014	0.392947
1.2562	0.637295	0.601311
0.257032	1.46407	0.20269
0.830318	0.651944	0.216856
0.611509	0.435872	0.531629
0.467729	0.662181	0.467698
0.511417	0.581366	0.344474
0.270401	0.593429	0.63988
0.363775	0.598168	0.794251
0.256358	0.411691	0.300248
0.41005	0.314227	0.421237
0.356164	0.637499	0.482724
0.797886	0.280562	0.344845
0.542757	0.501817	0.645147
0.919694	0.220416	0.892364
0.164286	1.16222	0.297745
0.538786	0.56343	0.445337
0.446767	0.572589	0.258165
0.637583	1.03842	0.903679
0.525784	0.139619	0.595955
0.351979	0.310376	0.471611
0.39016	0.374682	0.852611
0.375256	0.0776056	0.674542
0.870537	0.497012	0.531933
0.229672	0.604828	0.399064
0.17752	0.642355	0.230582
0.198931	1.1482	0.388209
0.592072	0.239979	0.843782
0.272056	0.525776	0.699067
0.43442	0.610111	0.469842
0.506363	0.979066	0.437453
0.324247	0.424977	0.97674
0.371626	0.474977	0.944561
0.551704	0.594177	1.06425
0.117756	0.68343	0.40603
0.483483	0.849795	0.437263
0.286181	0.6977	0.339381
0.451121	0.752583	1.05547
0.397598	0.388096	0.571881
0.336264	0.698086	0.8494
0.161426	0.559409	0.33666
0.897595	0.364337	0.385611
0.702438	0.417609	0.65601
0.566605	0.46873	0.223402
0.3388	0.319712	0.149122
0.254068	0.640098	0.802219
0.0351631	0.205632	0.439042
0.427254	0.534111	0.745501
0.560166	0.302818	0.392204
0.365328	0.731098	0.319963
0.685714	0.419369	0.353978
0.869015	0.708269	0.229563
0.672637	0.366906	0.549158
0.691784	0.388677	0.229363
0.372895	0.678814	0.414868
0.550574	0.308045	0.675754
0.747562	0.436344	0.35661
0.175901	0.109214	0.364841
0.681393	0.463271	0.295854
0.149144	0.535144	0.655092
0.1509	0.637603	0.342488
0.0681378	0.262511	0.31858
0.563869	1.00631	0.530675
0.109432	0.783605	0.200289
0.435873	0.451388	0.492453
0.080266	0.550131	0.0391938
0.226998	0.310662	0.512563
1.35133	0.463632	0.775269
0.479656	0.625301	0.459973
0.67317	0.509281	0.854836
0.247536	0.472873	0.0953337
0.63659	0.465772	0.443854
0.145796	1.07413	0.60288
0.0648437	1.02558	0.298302
0.323747	1.02991	0.674889
0.67394	1.26217	0.294476
0.257804	0.689132	0.693115
0.456162	0.513403	0.449125
0.193327	0.673238	0.692148
0.159505	0.498167	0.578907
0.656864	1.13578	0.0672096
0.476812	0.436429	0.322034
0.522147	0.878188	0.31114
0.335573	0.291941	0.370816
0.103587	0.506049	0.410536
0.420119	0.533854	0.335389
0.351413	1.00833	0.581064
0.0423661	0.758679	0.597346
0.278495	0.424249	0.121225
0.459301		0.277014
0.451946		0.149428
0.570139		0.407847
0.407356		0.359633
0.312007		0.393633
0.407847		0.863462
0.762134
0.409479
0.7376
0.423325
0.517842
0.527899
0.138257
0.4271
0.378019
0.133597

## Sheet: Fig.4E
	-Glucose										+Oligomycin-A
	MMTV-PyMT WT				MMTV-PyMT BK-KO						MMTV-PyMT WT				MMTV-PyMT BK-KO
Time (min)	Average	SD	N (cells)		Average	SD	N (cells)			Time (min)	Average	SD	N (cells)		Average	SD	N (cells)
0	1.00508	0.00927341	55		0.999748	0.00861509	65			0	1.00287	0.00874529	52		1.00636	0.012307	87
0.050023	0.999259	0.00902984	55		1.00124	0.00591859	65			0.050023	1.00052	0.00870295	52		0.999872	0.00942176	87
0.100157	1.00069	0.00948677	55		1.00254	0.00632225	65			0.100157	1.00086	0.0072002	52		1.00088	0.00879356	87
0.150142	0.999852	0.00784671	55		1.00127	0.00842543	65			0.150142	1.00027	0.0069859	52		0.997157	0.00823702	87
0.200128	0.998637	0.00902448	55		1.00003	0.00614356	65			0.200128	0.99783	0.00855396	52		0.997509	0.0113499	87
0.250023	1.00055	0.00886976	55		0.9998	0.00592107	65			0.250023	1.00144	0.00734095	52		0.997609	0.00806408	87
0.30014	0.998476	0.00742725	55		1.00059	0.00555784	65			0.30014	0.998495	0.00706637	52		0.996472	0.00818636	87
0.350152	0.994516	0.0101683	55		0.999654	0.00578897	65			0.350152	0.999073	0.00971225	52		0.997688	0.00925126	87
0.400107	0.997365	0.00767397	55		0.999456	0.00731145	65			0.400107	0.999139	0.00693178	52		0.996284	0.00806761	87
0.450112	0.994451	0.0097874	55		0.999129	0.00608948	65			0.450112	1	0.00727735	52		0.999106	0.00754053	87
0.500037	1.00028	0.00894026	55		0.998329	0.00600681	65			0.500037	0.997891	0.00671597	52		0.996531	0.00793176	87
0.550117	0.998522	0.00821331	55		0.997686	0.00455125	65			0.550117	0.998251	0.0066099	52		0.997293	0.00598045	87
0.600105	0.996274	0.00838953	55		1.00005	0.00610353	65			0.600105	0.99946	0.00768345	52		0.998285	0.0081671	87
0.650015	0.997549	0.00816112	55		1.00095	0.00575389	65			0.650015	1.0001	0.00584245	52		0.998753	0.00749556	87
0.700177	1.0027	0.00904474	55		0.99971	0.0071584	65			0.700177	0.999068	0.00732314	52		0.999172	0.00666616	87
0.75007	0.996537	0.011376	55		1.00214	0.00607807	65			0.75007	0.999293	0.00778953	52		0.997019	0.00660209	87
0.800123	1.00167	0.0080592	55		1.0007	0.00617527	65			0.800123	1.00097	0.00660468	52		0.998592	0.00712767	87
0.850067	0.998838	0.00710764	55		1.00001	0.00517251	65			0.850067	0.999796	0.00819061	52		1.00098	0.00820854	87
0.90003	0.998273	0.00962407	55		1.00034	0.00614143	65			0.90003	0.99809	0.00601889	52		1.00075	0.00851173	87
0.950058	0.997816	0.00936085	55		0.999848	0.00647193	65			0.950058	0.998474	0.00665048	52		0.998144	0.00713285	87
1.00015	0.998906	0.00866452	55		1.00094	0.0069295	65			1.00015	0.998027	0.00690185	52		0.998632	0.00736752	87
1.05015	1.00031	0.00900138	55		1.00178	0.00669111	65			1.05015	0.999242	0.00774594	52		1.00136	0.00730071	87
1.10011	1.00233	0.00782382	55		1.00001	0.00666826	65			1.10011	0.999464	0.00560404	52		0.999213	0.00538087	87
1.15008	0.999402	0.012583	55		1.00124	0.0056199	65			1.15008	1.00077	0.00560272	52		0.999436	0.00581763	87
1.20016	0.996821	0.0104616	55		1.00115	0.00577242	65			1.20016	0.999326	0.00616215	52		1.0004	0.00673484	87
1.25009	1.00178	0.00821243	55		1.00231	0.0069107	65			1.25009	1.00064	0.00692787	52		1.00234	0.00729786	87
1.30001	1.00095	0.00699466	55		0.999817	0.00634195	65			1.30001	1.00051	0.00843014	52		0.99986	0.00730676	87
1.35001	0.99977	0.00926982	55		1.00076	0.00570706	65			1.35001	0.998828	0.00462026	52		1.0017	0.00814598	87
1.4001	1.00181	0.0107156	55		1.00002	0.00596822	65			1.4001	1.00127	0.00592637	52		1.00119	0.00694349	87
1.45007	0.998064	0.0129587	55		0.99893	0.00582206	65			1.45007	1.00036	0.00562148	52		1.00124	0.00673761	87
1.50012	1.00421	0.00883224	55		1.00061	0.00608242	65			1.50012	1.00116	0.00689197	52		1.00131	0.00834019	87
1.55004	0.997545	0.0101804	55		0.998842	0.00709698	65			1.55004	1.0014	0.00681642	52		1.00102	0.00699503	87
1.60011	1.0002	0.00837858	55		0.999276	0.00690117	65			1.60011	1.00019	0.00883793	52		1.0014	0.00648735	87
1.65005	1.00124	0.0101131	55		1.00102	0.00622611	65			1.65005	1.00035	0.011499	52		0.999284	0.00825387	87
1.70013	1.00176	0.0122651	55		0.999862	0.00760702	65			1.70013	1.00024	0.00620965	52		0.999823	0.00665564	87
1.75007	0.999421	0.00828032	55		0.999917	0.00771279	65			1.75007	0.999888	0.00588243	52		1.00169	0.00720197	87
1.80005	0.999477	0.00967947	55		0.999789	0.00747816	65			1.80005	1.00018	0.0063353	52		1.00127	0.00809173	87
1.85015	0.999697	0.00830608	55		1.00156	0.00680436	65			1.85015	0.999219	0.00609917	52		1.00123	0.00728851	87
1.90011	0.999652	0.0104082	55		0.999207	0.00661384	65			1.90011	0.998936	0.00643173	52		1.00129	0.00716894	87
1.95005	0.999518	0.00733603	55		0.998469	0.00654665	65			1.95005	1.00104	0.00599596	52		1.00117	0.00680986	87
2.00001	0.997967	0.0102129	55		0.998231	0.00573648	65			2.00001	0.997872	0.00843312	52		1.00344	0.00682533	87
2.05014	0.999687	0.00931558	55		1.00084	0.00703195	65			2.05014	0.999169	0.00515472	52		1.00082	0.00801122	87
2.10002	1.00063	0.00696267	55		1.0004	0.00654168	65			2.10002	1.00156	0.00823054	52		1.00208	0.00933354	87
2.15002	0.99963	0.00779502	55		1.00055	0.00695991	65			2.15002	1.00106	0.0108592	52		1.00223	0.00686263	87
2.20017	0.99973	0.0127403	55		0.998952	0.00657073	65			2.20017	0.999782	0.00530794	52		1.00035	0.00842404	87
2.25005	1.00351	0.00799986	55		0.999465	0.00747456	65			2.25005	0.999107	0.00650686	52		1.0006	0.0083184	87
2.30014	1.00206	0.00909618	55		0.998535	0.00647114	65			2.30014	1.00112	0.00674344	52		1.00101	0.00657731	87
2.35004	0.998995	0.00913067	55		1.0002	0.00738119	65			2.35004	0.999592	0.00623557	52		1.00075	0.00814175	87
2.40012	1.00092	0.00901493	55		0.998672	0.00742337	65			2.40012	0.999681	0.0100036	52		1.00039	0.00808365	87
2.45005	1.00215	0.00761237	55		0.999989	0.00639261	65			2.45005	1.00148	0.00614418	52		1.00187	0.00786175	87
2.50016	0.997286	0.00912418	55		0.998234	0.00667964	65			2.50016	1.00183	0.00835796	52		1.00006	0.00724013	87
2.55007	1.00107	0.00805276	55		0.999586	0.00689729	65			2.55007	0.999908	0.00775788	52		1.00287	0.00755907	87
2.60014	0.997553	0.00964968	55		1.00002	0.00569014	65			2.60014	1.00165	0.00617329	52		1.00298	0.00646596	87
2.65016	0.997758	0.0103125	55		0.999446	0.00570478	65			2.65016	1.00187	0.00650454	52		1.00176	0.00872689	87
2.70002	0.999916	0.0101952	55		1	0.00704562	65			2.70002	1.00062	0.0067377	52		0.99949	0.0085531	87
2.75016	0.998376	0.00854837	55		0.999	0.00604093	65			2.75016	1.00022	0.00722928	52		1.00107	0.00798451	87
2.80012	0.998594	0.00935317	55		0.999232	0.00679571	65			2.80012	1.0009	0.00661577	52		1.00216	0.00871347	87
2.85016	1.00168	0.00831118	55		1.00056	0.00758166	65			2.85016	0.999707	0.00585845	52		1.00205	0.00891562	87
2.90002	0.998915	0.00937543	55		0.999731	0.00628284	65			2.90002	1.00177	0.00573633	52		0.999056	0.0076861	87
2.95004	0.997629	0.00811284	55		0.998302	0.00742424	65			2.95004	0.999058	0.00635768	52		1.00167	0.00742479	87
3.00016	0.995985	0.0109011	55		0.999099	0.0064394	65			3.00016	1.00162	0.0095474	52		1.00074	0.00736228	87
3.05014	1.00103	0.00895657	55		1.00256	0.00586113	65			3.05014	0.999341	0.007315	52		1.00126	0.00850444	87
3.10005	1.00269	0.0105928	55		0.999994	0.00617201	65			3.10005	1.00085	0.00521961	52		1.00182	0.00959556	87
3.15012	0.99952	0.00775124	55		1.00233	0.00668108	65			3.15012	0.999614	0.0084836	52		1.00177	0.00823933	87
3.20013	0.998968	0.00989187	55		0.999971	0.0073068	65			3.20013	1.00064	0.00570599	52		1.00239	0.00782866	87
3.25009	0.998618	0.0106302	55		0.999816	0.00587443	65			3.25009	1.00113	0.00629531	52		1.00308	0.0089147	87
3.30011	0.99945	0.00994927	55		0.999215	0.0064428	65			3.30011	0.999138	0.0060114	52		1.0009	0.00759069	87
3.35008	0.99605	0.00957242	55		1.00142	0.00671969	65			3.35008	1.00281	0.00602912	52		1.00113	0.00855362	87
3.40003	1.00224	0.00800504	55		0.999134	0.00778577	65			3.40003	1.00139	0.00637336	52		1.0033	0.00770544	87
3.45011	1.00188	0.00891219	55		1.00042	0.00674471	65			3.45011	0.999821	0.00591402	52		0.999369	0.0070342	87
3.50014	1.00062	0.0107996	55		1.00051	0.00663715	65			3.50014	0.998615	0.00921554	52		1.00038	0.00876606	87
3.55008	0.998341	0.00858654	55		1.00041	0.00628714	65			3.55008	1.00104	0.00560386	52		1.00135	0.00638564	87
3.60001	0.998121	0.0090043	55		1.00214	0.00580616	65			3.60001	1.00007	0.00511622	52		1.00096	0.00777271	87
3.65004	1.00235	0.0101832	55		1.0003	0.00633012	65			3.65004	1.00106	0.00512032	52		0.998825	0.00758288	87
3.70016	0.999162	0.00931152	55		0.999204	0.00664357	65			3.70016	0.999261	0.00817624	52		1.00307	0.00657835	87
3.75004	1.00129	0.00767877	55		0.999817	0.00732108	65			3.75004	1.00078	0.00748043	52		1.00249	0.00890086	87
3.80016	1.00113	0.00733416	55		0.999701	0.00513374	65			3.80016	0.999414	0.00604141	52		0.999515	0.00655215	87
3.85003	1.00336	0.00743961	55		0.999235	0.00581627	65			3.85003	0.999929	0.0080617	52		0.99869	0.00791254	87
3.90008	1.0017	0.00947506	55		0.999692	0.00478186	65			3.90008	0.998865	0.00670522	52		0.999316	0.00746124	87
3.95006	1.003	0.00733959	55		1.00092	0.00677024	65			3.95006	0.999687	0.0074177	52		1.0019	0.00663687	87
4.00021	1.00053	0.00925988	55		1.00086	0.00607705	65			4.00021	0.999228	0.00675635	52		0.999741	0.00740271	87
4.05013	1.00283	0.0086062	55		1.00003	0.00612267	65			4.05013	0.997949	0.0052101	52		1.00065	0.00557017	87
4.10004	0.996489	0.00886847	55		0.998564	0.00622733	65			4.10004	0.99909	0.00642383	52		1.00189	0.00641124	87
4.15006	1.00135	0.00670059	55		0.999272	0.00703543	65			4.15006	1.00063	0.00651486	52		0.999662	0.00772	87
4.20013	0.999225	0.00853594	55		0.9999	0.00643225	65			4.20013	0.999329	0.0065601	52		0.999934	0.0071137	87
4.25014	1.00063	0.0119999	55		0.999634	0.00697147	65			4.25014	1.00022	0.00520919	52		1.00098	0.00719494	87
4.30009	1.00098	0.00884824	55		1.00098	0.00576298	65			4.30009	1.00406	0.0230198	52		0.999601	0.00692551	87
4.35007	0.996612	0.00927986	55		1.00155	0.00666238	65			4.35007	0.99961	0.00584073	52		0.999345	0.00658425	87
4.40013	1.00106	0.0102664	55		0.999918	0.00569095	65			4.40013	0.999722	0.00686001	52		0.999134	0.00575601	87
4.45009	0.998954	0.00718706	55		1.00165	0.00750941	65			4.45009	0.9988	0.00618142	52		0.999639	0.00834221	87
4.50001	0.999634	0.00871126	55		1.00085	0.00643758	65			4.50001	0.997967	0.00614858	52		0.999785	0.00841856	87
4.55001	0.99664	0.00817742	55		1.00143	0.00744798	65			4.55001	0.99985	0.0131804	52		0.99766	0.00744593	87
4.60001	0.999151	0.00751861	55		1.00135	0.00669292	65			4.60001	0.998849	0.00819765	52		0.997295	0.0093198	87
4.65005	0.99819	0.00876721	55		0.998559	0.0062421	65			4.65005	0.998985	0.0071153	52		0.996268	0.00837539	87
4.70005	0.997659	0.00929899	55		1.00032	0.00654032	65			4.70005	1.00079	0.00753718	52		0.996262	0.0104341	87
4.75002	1.0013	0.00879302	55		1.00027	0.00644835	65			4.75002	0.998992	0.00806246	52		0.996848	0.011237	87
4.80011	0.998271	0.00717638	55		1.00061	0.00710077	65			4.80011	0.999214	0.00688642	52		0.993715	0.0116418	87
4.85005	0.996261	0.00692849	55		1.00259	0.00807484	65			4.85005	0.998529	0.00597739	52		0.995329	0.0130869	87
4.90013	0.998595	0.00845696	55		1.00207	0.00666975	65			4.90013	0.999137	0.00635234	52		0.996036	0.0141497	87
4.95012	0.996808	0.00868282	55		1.00231	0.0075079	65			4.95012	0.999749	0.00655593	52		0.992623	0.0149838	87
5.00015	0.998727	0.010738	55		1.00228	0.00692388	65			5.00015	0.999605	0.00977079	52		0.991585	0.014167	87
5.05009	0.99715	0.0121738	55		1.00025	0.00672695	65			5.05009	1.00226	0.0101183	52		0.992619	0.0165012	87
5.10015	0.999117	0.0144069	55		1.00093	0.00812752	65			5.10015	1.0001	0.011207	52		0.993518	0.0183922	87
5.15001	0.997756	0.0146221	55		1.00002	0.00950759	65			5.15001	1.00037	0.00869102	52		0.992926	0.0179431	87
5.20012	0.99987	0.0136662	55		1.00106	0.00921038	65			5.20012	0.99975	0.009099	52		0.990897	0.020049	87
5.25003	0.999102	0.0148878	55		1.00209	0.00849026	65			5.25003	0.999972	0.00714745	52		0.990283	0.021713	87
5.3001	0.999219	0.013911	55		1.00461	0.010946	65			5.3001	0.999388	0.00620097	52		0.991224	0.0234751	87
5.35016	0.997918	0.0135578	55		1.01448	0.0269512	65			5.35016	1.00323	0.0162768	52		1.00117	0.0328785	87
5.40011	0.997969	0.0147007	55		1.01407	0.0219366	65			5.40011	1.01851	0.0417585	52		1.00662	0.0569978	87
5.4501	0.995584	0.0138834	55		1.01211	0.0151705	65			5.4501	1.02795	0.0539645	52		1.01215	0.0604883	87
5.50015	1.03501	0.0537745	55		1.01091	0.0170766	65			5.50015	1.03361	0.0516173	52		1.01351	0.0591931	87
5.55009	1.03701	0.0576141	55		1.00765	0.0152177	65			5.55009	1.03369	0.0486143	52		1.00996	0.0504893	87
5.60005	1.04712	0.0692844	55		1.00683	0.0129603	65			5.60005	1.03914	0.0611462	52		1.00358	0.042361	87
5.6501	1.05373	0.0739733	55		1.00785	0.0128117	65			5.6501	1.04014	0.0649053	52		1.0089	0.044716	87
5.70015	1.04793	0.0482193	55		1.00596	0.0128571	65			5.70015	1.0335	0.0551897	52		1.00345	0.0398435	87
5.75001	1.03537	0.0435296	55		1.00589	0.0119557	65			5.75001	1.02332	0.0440778	52		0.999978	0.0375802	87
5.80014	1.03776	0.0412436	55		1.00622	0.0104266	65			5.80014	1.01477	0.0373109	52		0.999399	0.0409945	87
5.85012	1.02861	0.0398143	55		1.006	0.0108071	65			5.85012	1.0077	0.0365915	52		0.999077	0.0473342	87
5.90002	1.02011	0.0418584	55		1.00517	0.0123997	65			5.90002	1.00447	0.0353436	52		1.00284	0.0592057	87
5.95006	1.01753	0.0475197	55		1.00663	0.0107512	65			5.95006	0.999805	0.0377517	52		0.997734	0.0608183	87
6.00011	1.0123	0.0489753	55		1.00447	0.0108939	65			6.00011	0.995999	0.038958	52		0.990977	0.0599488	87
6.05003	1.00701	0.0510338	55		1.00397	0.0120802	65			6.05003	0.994402	0.0423042	52		0.985449	0.0625692	87
6.10016	1.00256	0.0513448	55		1.00494	0.0120989	65			6.10016	0.98857	0.0446344	52		0.979659	0.0626654	87
6.15001	0.996662	0.0549796	55		1.0043	0.0122615	65			6.15001	0.987972	0.0482332	52		0.971231	0.0616547	87
6.20012	0.994329	0.0554836	55		1.00504	0.0143421	65			6.20012	0.981576	0.0500855	52		0.96569	0.0698495	87
6.25003	0.99336	0.0577161	55		1.00622	0.0130909	65			6.25003	0.976662	0.0530904	52		0.959533	0.0683092	87
6.30011	0.989901	0.0610221	55		1.00317	0.0138302	65			6.30011	0.974945	0.0573398	52		0.949595	0.0680695	87
6.3501	0.98474	0.0635004	55		1.00527	0.0151856	65			6.3501	0.97124	0.0595954	52		0.940053	0.0670694	87
6.4002	0.984221	0.0614557	55		1.00418	0.0159544	65			6.4002	0.967776	0.0625314	52		0.932835	0.0698795	87
6.45017	0.978558	0.0648829	55		1.00407	0.0165756	65			6.45017	0.964777	0.0673779	52		0.926518	0.0724949	87
6.50011	0.975372	0.0652337	55		1.00209	0.0186168	65			6.50011	0.960469	0.0713112	52		0.918113	0.0753262	87
6.55008	0.976408	0.0652579	55		1.0016	0.0177366	65			6.55008	0.957627	0.0769228	52		0.9159	0.0825629	87
6.60001	0.974342	0.0696829	55		1.00295	0.0178395	65			6.60001	0.952888	0.0794385	52		0.90574	0.082258	87
6.6501	0.968897	0.0706928	55		1.00352	0.0186684	65			6.6501	0.949193	0.0835486	52		0.897929	0.0829989	87
6.70001	0.966708	0.0712979	55		1.00266	0.0190442	65			6.70001	0.947319	0.0873275	52		0.894785	0.0866073	87
6.75005	0.960794	0.0730509	55		1.00394	0.0188836	65			6.75005	0.942768	0.0897093	52		0.888578	0.0894126	87
6.80014	0.959503	0.0749985	55		1.00101	0.019979	65			6.80014	0.940721	0.0930069	52		0.882548	0.091709	87
6.85016	0.956699	0.0784187	55		1.00255	0.0209802	65			6.85016	0.939418	0.0956812	52		0.875447	0.0895418	87
6.90007	0.951261	0.0790098	55		1.00217	0.0224525	65			6.90007	0.933847	0.0971342	52		0.867417	0.0898843	87
6.95008	0.951501	0.0815828	55		0.99975	0.0201405	65			6.95008	0.935942	0.100891	52		0.863672	0.0915211	87
7.00001	0.94656	0.0811656	55		1.00104	0.0223736	65			7.00001	0.930782	0.10279	52		0.85831	0.0930262	87
7.05009	0.945671	0.0835767	55		0.999306	0.0218563	65			7.05009	0.928967	0.102898	52		0.853996	0.0927389	87
7.10006	0.943684	0.082766	55		0.998252	0.0224215	65			7.10006	0.928929	0.10396	52		0.849991	0.0945117	87
7.15008	0.941095	0.0849278	55		0.999712	0.0235511	65			7.15008	0.92912	0.10765	52		0.845109	0.0954306	87
7.20016	0.938465	0.0887725	55		0.996089	0.0225143	65			7.20016	0.926486	0.107012	52		0.841517	0.0978217	87
7.25005	0.933083	0.0894222	55		0.996563	0.0232039	65			7.25005	0.923698	0.107957	52		0.837199	0.0984036	87
7.30012	0.931873	0.0926283	55		0.996077	0.0224012	65			7.30012	0.924789	0.110073	52		0.833774	0.0995264	87
7.35003	0.928982	0.0937731	55		0.99346	0.0228824	65			7.35003	0.924685	0.110862	52		0.832013	0.102312	87
7.40003	0.928603	0.0935342	55		0.994376	0.0234624	65			7.40003	0.924157	0.109922	52		0.827825	0.102319	87
7.45002	0.922041	0.0977215	55		0.992942	0.0225687	65			7.45002	0.922628	0.108799	52		0.82752	0.102121	87
7.50002	0.920126	0.094878	55		0.994036	0.0252177	65			7.50002	0.922096	0.110057	52		0.823769	0.102433	87
7.55013	0.916568	0.0958263	55		0.99155	0.0247188	65			7.55013	0.921762	0.1109	52		0.822358	0.103727	87
7.60007	0.910457	0.0997008	55		0.991792	0.024288	65			7.60007	0.922039	0.112088	52		0.819621	0.105324	87
7.65005	0.906124	0.0968505	55		0.991274	0.0253389	65			7.65005	0.920362	0.111322	52		0.818538	0.105282	87
7.70016	0.903909	0.0980387	55		0.989495	0.026341	65			7.70016	0.9209	0.113368	52		0.817716	0.106428	87
7.75002	0.899371	0.101047	55		0.990962	0.0265732	65			7.75002	0.920706	0.113897	52		0.814254	0.107203	87
7.80016	0.896452	0.0996927	55		0.990365	0.0259269	65			7.80016	0.921718	0.112632	52		0.814344	0.107391	87
7.85009	0.893443	0.099994	55		0.989896	0.0261137	65			7.85009	0.919877	0.113217	52		0.814636	0.107187	87
7.9001	0.887879	0.101614	55		0.99017	0.0254328	65			7.9001	0.919024	0.113463	52		0.811065	0.108915	87
7.95012	0.884705	0.103776	55		0.99107	0.0260393	65			7.95012	0.919418	0.113095	52		0.8119	0.110733	87
8.00011	0.885227	0.103467	55		0.990155	0.0249154	65			8.00011	0.917681	0.113282	52		0.809539	0.110629	87
8.05002	0.882139	0.102522	55		0.991067	0.025136	65			8.05002	0.917813	0.112876	52		0.808909	0.110653	87
8.10013	0.878029	0.106986	55		0.990802	0.0247044	65			8.10013	0.918747	0.112608	52		0.810899	0.111618	87
8.15015	0.872741	0.106404	55		0.989051	0.02625	65			8.15015	0.918444	0.113732	52		0.808398	0.111088	87
8.20005	0.870925	0.107211	55		0.989189	0.0245607	65			8.20005	0.917928	0.11272	52		0.808406	0.11193	87
8.25001	0.865149	0.108653	55		0.991008	0.0240025	65			8.25001	0.918591	0.112755	52		0.808139	0.111208	87
8.30003	0.862635	0.111292	55		0.988701	0.024699	65			8.30003	0.919658	0.115435	52		0.808345	0.114128	87
8.35007	0.861542	0.11215	55		0.984258	0.0327539	65			8.35007	0.920141	0.114633	52		0.808311	0.112031	87
8.40002	0.854893	0.115703	55		0.984367	0.0326011	65			8.40002	0.919606	0.113891	52		0.808083	0.113216	87
8.45014	0.853396	0.11446	55		0.984674	0.0323972	65			8.45014	0.918254	0.112702	52		0.805597	0.114271	87
8.50001	0.851264	0.115234	55		0.984998	0.0314102	65			8.50001	0.918464	0.113406	52		0.807055	0.112858	87
8.55011	0.84954	0.116611	55		0.984151	0.0325216	65			8.55011	0.917379	0.112633	52		0.807101	0.114606	87
8.60013	0.845002	0.120616	55		0.98221	0.0333257	65			8.60013	0.917187	0.113578	52		0.805161	0.114617	87
8.65001	0.841428	0.120545	55		0.982281	0.032181	65			8.65001	0.919289	0.114631	52		0.807038	0.113336	87
8.70009	0.841049	0.120222	55		0.983709	0.0334334	65			8.70009	0.918378	0.114031	52		0.806766	0.11395	87
8.75013	0.836921	0.123724	55		0.982445	0.0350484	65			8.75013	0.919363	0.114574	52		0.807934	0.115445	87
8.80014	0.836049	0.123485	55		0.982721	0.0362543	65			8.80014	0.917793	0.115947	52		0.806645	0.11519	87
8.85012	0.832553	0.122649	55		0.980127	0.0392868	65			8.85012	0.91855	0.114905	52		0.807009	0.114257	87
8.90004	0.829273	0.123902	55		0.978202	0.0408614	65			8.90004	0.919521	0.115562	52		0.805722	0.114011	87
8.95005	0.826702	0.127883	55		0.978567	0.0408525	65			8.95005	0.917862	0.115171	52		0.806946	0.114645	87
9.00006	0.825464	0.128561	55		0.975782	0.0435835	65			9.00006	0.917059	0.116366	52		0.807413	0.113548	87
9.05015	0.821018	0.129676	55		0.976621	0.0446744	65			9.05015	0.917568	0.114809	52		0.805311	0.11578	87
9.10012	0.818041	0.131671	55		0.976495	0.044915	65			9.10012	0.920368	0.116206	52		0.806259	0.115818	87
9.15013	0.818702	0.132453	55		0.976526	0.0448921	65			9.15013	0.91731	0.11522	52		0.807618	0.115968	87
9.20003	0.81429	0.130156	55		0.974252	0.0471508	65			9.20003	0.918908	0.115486	52		0.806892	0.11645	87
9.25004	0.81371	0.132611	55		0.973902	0.046814	65			9.25004	0.918524	0.114721	52		0.805287	0.116254	87
9.30011	0.812791	0.132836	55		0.976148	0.0462452	65			9.30011	0.918914	0.116525	52		0.804369	0.117361	87
9.35015	0.808325	0.134969	55		0.975626	0.0446093	65			9.35015	0.920028	0.117205	52		0.806071	0.116503	87
9.40009	0.808547	0.135334	55		0.973827	0.0469098	65			9.40009	0.916672	0.117084	52		0.805158	0.116857	87
9.45015	0.806299	0.136309	55		0.972509	0.0476141	65			9.45015	0.916687	0.118096	52		0.804085	0.117017	87
9.50006	0.804439	0.137454	55		0.974382	0.0479625	65			9.50006	0.916791	0.117178	52		0.805493	0.118022	87
9.55014	0.805001	0.136935	55		0.972833	0.0457131	65			9.55014	0.915308	0.117194	52		0.80599	0.11736	87
9.60008	0.798768	0.137086	55		0.975347	0.044331	65			9.60008	0.916638	0.117299	52		0.804335	0.118419	87
9.65008	0.80224	0.137517	55		0.973359	0.0443331	65			9.65008	0.915628	0.11605	52		0.802514	0.11775	87
9.70005	0.797785	0.13811	55		0.973355	0.0426745	65			9.70005	0.915865	0.11604	52		0.802412	0.118671	87
9.75016	0.798038	0.141564	55		0.975296	0.040208	65			9.75016	0.917644	0.117822	52		0.801985	0.12121	87
9.80007	0.795715	0.138687	55		0.9769	0.0415717	65			9.80007	0.916732	0.118024	52		0.800983	0.119587	87
9.85004	0.79356	0.139379	55		0.976033	0.0419914	65			9.85004	0.916389	0.117111	52		0.803182	0.11871	87
9.90014	0.791601	0.140194	55		0.975504	0.0409296	65			9.90014	0.915193	0.118328	52		0.801944	0.1212	87
9.95011	0.790879	0.140802	55		0.975522	0.0414865	65			9.95011	0.916967	0.118877	52		0.800356	0.120392	87
10.0002	0.791163	0.141024	55		0.974831	0.0435436	65			10.0002	0.915423	0.11843	52		0.800395	0.121798	87
10.0502	0.787853	0.141495	55		0.974402	0.0438119	65			10.0502	0.916406	0.117394	52		0.80097	0.122102	87
10.1001	0.78657	0.142796	55		0.976564	0.0436943	65			10.1001	0.91537	0.120157	52		0.799599	0.122391	87
10.1501	0.784482	0.141776	55		0.977061	0.0425119	65			10.1501	0.916327	0.119664	52		0.798124	0.121748	87
10.2001	0.784374	0.141795	55		0.974597	0.0425747	65			10.2001	0.915217	0.120957	52		0.800008	0.124024	87
10.2501	0.783224	0.141379	55		0.977421	0.0398638	65			10.2501	0.916341	0.12079	52		0.799271	0.124407	87
10.3001	0.782128	0.142294	55		0.978412	0.0355925	65			10.3001	0.914132	0.12139	52		0.799663	0.12418	87
10.3502	0.781763	0.143838	55		0.978539	0.0355582	65			10.3502	0.914963	0.121463	52		0.79975	0.124799	87
10.4001	0.780884	0.144475	55		0.975899	0.0369823	65			10.4001	0.914993	0.120245	52		0.798539	0.126053	87
10.45	0.780045	0.143495	55		0.97774	0.0377263	65			10.45	0.913932	0.121425	52		0.797943	0.126513	87
10.5001	0.778424	0.144637	55		0.980847	0.0360293	65			10.5001	0.915144	0.122382	52		0.797097	0.12662	87
10.5501	0.779099	0.145536	55		0.977144	0.0376177	65			10.5501	0.915175	0.123445	52		0.798395	0.127459	87
10.6	0.776076	0.143835	55		0.976801	0.0406275	65			10.6	0.915755	0.122267	52		0.797441	0.128213	87
10.6501	0.775798	0.144901	55		0.976147	0.0395526	65			10.6501	0.913498	0.122348	52		0.79574	0.129676	87
10.7001	0.775255	0.144554	55		0.978126	0.0376052	65			10.7001	0.916284	0.123935	52		0.797314	0.129206	87
10.75	0.772344	0.145766	55		0.977055	0.0404668	65			10.75	0.914342	0.123823	52		0.793995	0.130938	87
10.8002	0.772351	0.14581	55		0.977213	0.0414061	65			10.8002	0.913985	0.126091	52		0.795318	0.130963	87
10.8502	0.771212	0.143664	55		0.978987	0.0364156	65			10.8502	0.913319	0.124147	52		0.794327	0.131541	87
10.9	0.771329	0.145254	55		0.979109	0.0366442	65			10.9	0.913242	0.123832	52		0.794564	0.13231	87
10.95	0.771701	0.144539	55		0.978112	0.0373624	65			10.95	0.915683	0.125203	52		0.795991	0.131606	87
11.0001	0.769309	0.146248	55		0.97779	0.0380554	65			11.0001	0.914457	0.124238	52		0.794315	0.132624	87
11.0501	0.768177	0.147257	55		0.97838	0.0361145	65			11.0501	0.91295	0.12442	52		0.793456	0.133033	87
11.1001	0.768656	0.146933	55		0.978572	0.0380146	65			11.1001	0.91181	0.124728	52		0.793404	0.134959	87
11.15	0.767287	0.147563	55		0.980515	0.0386319	65			11.15	0.912711	0.126454	52		0.791185	0.13554	87
11.2001	0.770083	0.146253	55		0.975219	0.0404594	65			11.2001	0.911811	0.126584	52		0.792971	0.136302	87
11.2501	0.76773	0.14664	55		0.976965	0.0411201	65			11.2501	0.912454	0.127063	52		0.792294	0.137075	87
11.3	0.766234	0.147035	55		0.977641	0.0417474	65			11.3	0.911713	0.128154	52		0.790858	0.137969	87
11.3502	0.767342	0.146968	55		0.973836	0.0445881	65			11.3502	0.913881	0.127716	52		0.790764	0.137053	87
11.4002	0.764004	0.148221	55		0.976772	0.0443993	65			11.4002	0.911266	0.126057	52		0.788309	0.138419	87
11.4502	0.763436	0.14729	55		0.97718	0.0405052	65			11.4502	0.912236	0.128784	52		0.789344	0.140324	87
11.5001	0.767449	0.147131	55		0.975155	0.0423238	65			11.5001	0.909986	0.126922	52		0.789291	0.139837	87
11.5501	0.762976	0.147169	55		0.976837	0.0415605	65			11.5501	0.910636	0.127522	52		0.789993	0.140957	87
11.6001	0.764163	0.146975	55		0.976809	0.0417161	65			11.6001	0.912172	0.128145	52		0.789732	0.140729	87
11.65	0.762859	0.147326	55		0.977364	0.0404321	65			11.65	0.911107	0.127528	52		0.788159	0.142338	87
11.7001	0.763427	0.14729	55		0.976541	0.0423067	65			11.7001	0.911489	0.128832	52		0.786529	0.143047	87
11.7501	0.764866	0.146529	55		0.974512	0.0422076	65			11.7501	0.912706	0.128084	52		0.785882	0.143134	87
11.8001	0.763561	0.146347	55		0.974742	0.0433112	65			11.8001	0.91118	0.128832	52		0.78585	0.144679	87
11.8502	0.7622	0.146551	55		0.974914	0.0439444	65			11.8502	0.911311	0.129338	52		0.785681	0.145809	87
11.9001	0.763872	0.145966	55		0.976015	0.0434379	65			11.9001	0.910892	0.129354	52		0.785259	0.146936	87
11.95	0.76181	0.145584	55		0.976341	0.0441549	65			11.95	0.911339	0.130942	52		0.784303	0.147129	87
12.0001	0.763059	0.147071	55		0.974275	0.0459932	65			12.0001	0.910683	0.129861	52		0.78549	0.147489	87
12.0501	0.76143	0.146236	55		0.973541	0.0471134	65			12.0501	0.910458	0.1296	52		0.784214	0.147146	87
12.1	0.761133	0.145544	55		0.971909	0.0489169	65			12.1	0.911816	0.130281	52		0.784327	0.148009	87
12.15	0.759322	0.147617	55		0.972935	0.0492407	65			12.15	0.910885	0.131388	52		0.782845	0.150407	87
12.2001	0.760377	0.147157	55		0.974519	0.0482344	65			12.2001	0.90975	0.130632	52		0.781872	0.151332	87
12.2501	0.759933	0.146693	55		0.97323	0.0494989	65			12.2501	0.910216	0.131411	52		0.782059	0.152233	87
12.3001	0.76071	0.146231	55		0.972747	0.0488766	65			12.3001	0.913173	0.131666	52		0.783805	0.15149	87
12.3501	0.759336	0.1472	55		0.973481	0.0493161	65			12.3501	0.91065	0.132122	52		0.780494	0.153117	87
12.4002	0.75806	0.1458	55		0.974142	0.0495126	65			12.4002	0.909613	0.133095	52		0.77965	0.155018	87
12.4501	0.757577	0.146936	55		0.972538	0.0510821	65			12.4501	0.910388	0.131408	52		0.780109	0.153395	87
12.5002	0.759027	0.14679	55		0.974185	0.0498353	65			12.5002	0.909688	0.131731	52		0.778564	0.15625	87
12.5501	0.757508	0.145107	55		0.974173	0.0478461	65			12.5501	0.910252	0.132686	52		0.778821	0.156098	87
12.6002	0.757666	0.143565	55		0.97188	0.0504494	65			12.6002	0.910813	0.133099	52		0.779144	0.156613	87
12.6501	0.755935	0.149056	55		0.972263	0.0500965	65			12.6501	0.908937	0.131007	52		0.779045	0.157835	87
12.7002	0.755964	0.145974	55		0.971141	0.0504568	65			12.7002	0.909965	0.131648	52		0.777151	0.158545	87
12.7501	0.757045	0.14829	55		0.972496	0.0499317	65			12.7501	0.909841	0.133282	52		0.777415	0.159613	87
12.8001	0.756543	0.145583	55		0.972682	0.0508379	65			12.8001	0.910167	0.133522	52		0.776686	0.15933	87
12.8501	0.753539	0.144229	55		0.974031	0.050424	65			12.8501	0.910291	0.132706	52		0.777233	0.159635	87
12.9001	0.75635	0.146828	55		0.972139	0.0504028	65			12.9001	0.90942	0.133806	52		0.775665	0.160178	87
12.9501	0.755399	0.145066	55		0.971736	0.0519305	65			12.9501	0.910939	0.133173	52		0.776236	0.161568	87
13.0002	0.753941	0.144721	55		0.973841	0.0520753	65			13.0002	0.909655	0.135172	52		0.775744	0.161569	87
13.0502	0.755294	0.146071	55		0.974202	0.0536801	65			13.0502	0.909501	0.133171	52		0.774303	0.162059	87
13.1	0.752516	0.147058	55		0.972435	0.0523911	65			13.1	0.910394	0.135496	52		0.774574	0.162335	87
13.15	0.752905	0.146219	55		0.973169	0.0528735	65			13.15	0.910385	0.135974	52		0.773538	0.163224	87
13.2001	0.751379	0.146803	55		0.971525	0.0529684	65			13.2001	0.908373	0.133875	52		0.774809	0.1646	87
13.25	0.750502	0.147503	55		0.973504	0.0537868	65			13.25	0.90848	0.13532	52		0.773678	0.165189	87
13.3001	0.752939	0.148699	55		0.973212	0.0530582	65			13.3001	0.911104	0.136372	52		0.775402	0.163483	87
13.3501	0.750899	0.147942	55		0.970307	0.053024	65			13.3501	0.909165	0.135564	52		0.772558	0.165709	87
13.4001	0.752178	0.146416	55		0.969467	0.053609	65			13.4001	0.908772	0.134088	52		0.771871	0.166977	87
13.4501	0.750908	0.146799	55		0.973094	0.0543324	65			13.4501	0.90657	0.135832	52		0.773127	0.167743	87
13.5002	0.751864	0.147136	55		0.972273	0.0537514	65			13.5002	0.907094	0.136391	52		0.773302	0.167057	87
13.55	0.749665	0.148647	55		0.971453	0.0535961	65			13.55	0.907902	0.135746	52		0.771851	0.168524	87
13.6001	0.749688	0.14554	55		0.97083	0.0530255	65			13.6001	0.907598	0.136103	52		0.772668	0.170594	87
13.6501	0.749427	0.147496	55		0.972121	0.0538065	65			13.6501	0.907163	0.13548	52		0.771566	0.170502	87
13.7	0.750697	0.146186	55		0.972019	0.0544618	65			13.7	0.907762	0.136395	52		0.771503	0.170682	87
13.7501	0.750357	0.146627	55		0.972356	0.053888	65			13.7501	0.907744	0.136935	52		0.771461	0.171661	87
13.8002	0.749689	0.147621	55		0.971718	0.0544428	65			13.8002	0.907065	0.137802	52		0.771601	0.172493	87
13.8501	0.747654	0.148243	55		0.969732	0.0556241	65			13.8501	0.908484	0.13751	52		0.771085	0.172818	87
13.9	0.748006	0.148708	55		0.970185	0.0553341	65			13.9	0.907003	0.136945	52		0.770367	0.17334	87
13.95	0.747808	0.145976	55		0.970549	0.0548346	65			13.95	0.907217	0.138925	52		0.769306	0.174252	87
14.0001	0.747878	0.147318	55		0.969838	0.0547398	65			14.0001	0.907465	0.140175	52		0.768497	0.17347	87
14.05	0.745969	0.148055	55		0.970807	0.054813	65			14.05	0.907075	0.139397	52		0.769048	0.175128	87
14.1	0.745027	0.14815	55		0.969855	0.0556926	65			14.1	0.906156	0.139288	52		0.768713	0.17481	87
14.1502	0.748149	0.146313	55		0.971914	0.0554616	65			14.1502	0.906622	0.139222	52		0.7697	0.176559	87
14.2	0.746366	0.146509	55		0.969008	0.0555286	65			14.2	0.905606	0.138648	52		0.769204	0.175442	87
14.2501	0.747002	0.147597	55		0.972097	0.0569849	65			14.2501	0.907895	0.141201	52		0.768841	0.177705	87
14.3001	0.746554	0.146978	55		0.970843	0.0558409	65			14.3001	0.905633	0.138345	52		0.767822	0.177944	87
14.3501	0.744455	0.147251	55		0.970342	0.0565127	65			14.3501	0.90535	0.140335	52		0.76685	0.178852	87
14.4	0.74516	0.14695	55		0.969514	0.0560176	65			14.4	0.906649	0.140727	52		0.768235	0.180128	87
14.4502	0.743472	0.14868	55		0.968011	0.0561961	65			14.4502	0.907166	0.141756	52		0.766419	0.179964	87
14.5001	0.745865	0.145903	55		0.968737	0.0566495	65			14.5001	0.906378	0.141584	52		0.766327	0.180832	87
14.55	0.743526	0.146358	55		0.969819	0.0569791	65			14.55	0.906473	0.142698	52		0.766671	0.182814	87
14.6001	0.745479	0.147688	55		0.970132	0.0569406	65			14.6001	0.906196	0.142569	52		0.765152	0.182288	87
14.65	0.744632	0.147039	55		0.968272	0.0564969	65			14.65	0.905248	0.140751	52		0.765104	0.183511	87
14.7001	0.743424	0.149947	55		0.970294	0.0571988	65			14.7001	0.904967	0.142306	52		0.764352	0.182872	87
14.7501	0.743956	0.146838	55		0.969438	0.0552619	65			14.7501	0.90822	0.144254	52		0.763767	0.184068	87
14.8001	0.743046	0.146149	55		0.967647	0.0573257	65			14.8001	0.906328	0.143712	52		0.763303	0.184555	87
14.8501	0.741922	0.147692	55		0.969075	0.0568046	65			14.8501	0.908066	0.14337	52		0.763153	0.184713	87
14.9	0.742821	0.147415	55		0.967591	0.0566803	65			14.9	0.907148	0.14532	52		0.761268	0.186341	87
14.9502	0.744076	0.148128	55		0.968683	0.0575584	65			14.9502	0.905586	0.143421	52		0.762755	0.185673	87

## Sheet: Fig.4F
MMTV-PyMT WT				MMTV-PyMT BK-KO
ctrl	+ PAX	+ IBTX		ctrl	+ PAX	+ IBTX
1.01642	0.109173	2.28645		0.0506081	-1.3731	0.239117
1.2152	0.143154	2.2838		-0.0390264	0.642374	0.248871
0.973856	0.0308431	2.48529		0.0895915	0.102478	0.2645
4.31471	0.0773093	2.76605		-0.00338771	0.117294	0.0868905
2.57749	0.0822185	2.96796		0.097706	0.155584	0.470497
4.25052	0.12938	2.67761		0.120789	0.206996	0.240518
3.35579	0.162723	1.71182		0.073974	0.157872	0.382835
4.67584	0.00783702	1.90837		0.00770554	0.398598	0.179478
3.64276	0.00251804	3.6125		0.0234357	0.215607	0.0990033
4.84595	0.147998	3.02548		0.00769065	0.146718	0.374381
2.8953	0.0559352	2.91403		0.0766659	0.113498	0.170607
2.03833	0.0881736	1.86491		-0.0496944	0.327523	0.329945
3.83939	0.204715	2.13005		-0.0268499	0.397763	0.208964
5.02342	0.0857968	2.47347		0.0260905	0.224127	0.0913434
3.6163	0.208447	2.26252		0.0376165	0.191085	0.264327
4.95667	0.213798	2.53668		0.0940173	0.110174	0.215952
1.94744	0.137317	1.81691		0.101252	0.0352091	0.376588
4.40347	0.131086	1.54699		0.0729573	-0.0244601	0.302093
0.764672	0.122015	3.0616		0.00630148	0.102029	0.423221
2.86832	0.0621837	3.07712		0.15148	0.155872	-0.0652939
4.3884	0.0578269	0.925012		0.0968839	0.257401	-0.0413752
1.84239	0.114834	0.949179		0.109158	0.245634	-0.0735814
2.67409	0.0790332	1.04003		0.0875903	0.184268	-0.0281116
4.68457	-0.0454966	1.29926		0.0676284	0.326985	0.0732678
4.71179	0.239076	1.34739		0.15067	0.0872851	0.122642
4.65558	0.159649	1.74067		0.08279	0.43058	0.13078
3.36498	0.0887443	1.46153		0.0424682	0.0747324	0.117234
2.73231	0.0997601			0.0712762	0.356161	0.0627771
3.07511	0.0365544			-0.107189	0.0488002
3.08383	0.00879936			0.07526	-0.801621
4.85636	0.287927			0.39377	0.158319
3.60817	0.0868276			0.137853	0.00260353
2.61215	0.147493			0.0482249	0.41301
0.235734	0.132718			0.224782	0.254211
0.974703	0.0878095			0.241788	0.415756
0.841809	0.249961			0.259735	0.289244
-0.528594	0.265489			0.248657	0.128711
0.12095	0.220934			0.358201	0.125006
2.80863	0.131254			0.463168	0.204276
3.97956	-0.00706103			0.318116	-0.417912
0.834333	-0.0512377			0.298628	0.162007
1.0485	-0.0431399			0.453265	-1.19519
0.277826	-0.0764906			0.202112	0.14608
0.233665	-0.106422			0.210675	0.354121
1.2325	-0.0649414			0.706665	0.125006
0.476686				0.0355849	0.204276
0.219855				0.0431031	-0.417912
3.1378				0.250233	0.162007
2.78663				0.208711	-1.19519
3.2042				0.139699	0.14608
3.76676				0.0712265	0.354121
4.03362				0.315483	0.204276
3.79561				0.0237678	-0.417912
2.32272				-0.420675	0.162007
4.63618				-0.387484	-1.19519
				0.0310624	0.14608
				0.224355	0.354121
				0.0556384
				0.529953
				0.364608
				0.542649
				1.44005
				0.561289
				0.484273
				0.124878

## Sheet: Fig.4G
-Glucose														+Oligomycin-A
	MDA-MB-453 ctrl				MDA-MB-453 + PAX				MDA-MB-453 + IBTX						MDA-MB-453 ctrl				MDA-MB-453 + PAX				MDA-MB-453 + IBTX
Time (min)	Average	SD	N (cells)		Average	SD	N (cells)		Average	SD	N (cells)			Time (min)	Average	SD	N (cells)		Average	SD	N (cells)		Average	SD	N (cells)
0	1.00423	0.00687358	14		1.00722	0.00393946	13		1.00191	0.00666791	13			0	1.01372	0.0239612	33		1.00669	0.00345894	21		1.00022	0.0071339	27
0.050172	1.00275	0.00585725	14		1.0027	0.0031256	13		1.00475	0.00527845	13			0.050215	1.00407	0.0137247	33		1.00323	0.00426427	21		1.00118	0.00756452	27
0.100062	1.00359	0.00514903	14		1.00096	0.00255247	13		0.99929	0.00644495	13			0.100133	1.00299	0.0121326	33		1.00146	0.00175681	21		1.00163	0.00675746	27
0.150262	1.00314	0.00501099	14		1.00121	0.00207747	13		1.00385	0.00457408	13			0.150032	1.00236	0.0110489	33		1.00035	0.00504269	21		0.999305	0.00420327	27
0.20013	1.00018	0.00552029	14		1.00002	0.00187207	13		1.0035	0.0083612	13			0.200045	1.00166	0.0090491	33		0.998349	0.00371347	21		1.00213	0.00811849	27
0.250115	1.00174	0.00474542	14		1.0006	0.00169809	13		1.00388	0.00507086	13			0.250065	1.0017	0.0084388	33		0.996923	0.00292242	21		1.00016	0.00454253	27
0.300117	1.00263	0.00502756	14		0.999888	0.00139321	13		1.00036	0.00633567	13			0.30012	1.00191	0.00993177	33		0.999157	0.00310984	21		1.00124	0.00491898	27
0.35009	1.00144	0.00367142	14		0.998708	0.00252468	13		1.00123	0.00836249	13			0.350162	0.998992	0.00883217	33		0.999112	0.00362657	21		1.00104	0.00505798	27
0.400208	1.00016	0.00398396	14		0.999213	0.00215792	13		0.998423	0.00752602	13			0.400097	0.995959	0.00864893	33		0.997374	0.00392315	21		0.999372	0.012647	27
0.450188	0.999751	0.00375055	14		0.998842	0.0023979	13		0.999553	0.00732731	13			0.450187	0.995957	0.00694017	33		0.997266	0.00250423	21		0.997973	0.00654472	27
0.500198	1.00083	0.00301891	14		0.999616	0.00266932	13		0.999136	0.00473969	13			0.500073	0.993844	0.00723879	33		0.997517	0.00433859	21		1.0022	0.00633151	27
0.550295	1.00125	0.00426939	14		0.999117	0.0022356	13		1.0008	0.00614394	13			0.550168	0.996507	0.00875593	33		0.997192	0.00388576	21		0.998068	0.00538323	27
0.600235	0.998808	0.00208072	14		0.999112	0.00263921	13		0.997312	0.00684516	13			0.60014	0.995609	0.00876472	33		0.999463	0.00271191	21		0.999338	0.00830836	27
0.650178	1.00115	0.00337525	14		0.999386	0.000869792	13		0.995632	0.0119599	13			0.650272	0.996572	0.00735615	33		0.998305	0.0054312	21		0.99859	0.00813115	27
0.700097	0.999472	0.00441593	14		0.998792	0.00178221	13		0.998107	0.005725	13			0.700232	0.997246	0.00894655	33		0.99661	0.0049328	21		1.00019	0.0042641	27
0.75007	0.998779	0.00388483	14		0.999843	0.00200381	13		0.999271	0.00510803	13			0.75005	0.994181	0.00828337	33		0.997811	0.00201521	21		0.998718	0.00616229	27
0.800075	0.997653	0.00336711	14		0.998506	0.00232067	13		0.997335	0.00629269	13			0.800057	0.996918	0.004211	33		0.996319	0.00364173	21		1.00223	0.00647577	27
0.85028	1.0014	0.00432062	14		0.999024	0.00185316	13		0.994452	0.0113485	13			0.850202	0.994313	0.0092477	33		1.0013	0.00496987	21		0.999298	0.00783945	27
0.900373	1.00028	0.00341625	14		0.999308	0.00137038	13		1.00051	0.00653017	13			0.900248	0.995118	0.00914895	33		1.00122	0.00291845	21		0.99986	0.00447954	27
0.950215	0.999964	0.00396	14		0.997596	0.00223116	13		0.997787	0.00582029	13			0.950077	0.993651	0.00918179	33		1.0009	0.00273034	21		1.00034	0.00746436	27
1.00015	1.00202	0.00411951	14		0.998189	0.00219422	13		0.998633	0.00860707	13			1.00011	0.997073	0.00766295	33		0.998015	0.00537287	21		0.997359	0.00724641	27
1.0503	1.00084	0.0042355	14		1	0.00216882	13		1.00039	0.00551385	13			1.05018	0.995935	0.00503393	33		0.999592	0.00328704	21		1.00029	0.00745576	27
1.1003	0.999632	0.00319509	14		0.998886	0.00252898	13		0.998029	0.00716174	13			1.10022	0.99705	0.00758238	33		0.998469	0.00343202	21		0.999081	0.00435958	27
1.15014	1.00075	0.0033301	14		0.999411	0.00252761	13		0.990446	0.00975901	13			1.15011	0.997381	0.00791681	33		0.999128	0.00541774	21		0.998168	0.00631253	27
1.20016	0.999863	0.00263814	14		0.998772	0.00198438	13		1.00146	0.0069247	13			1.20011	0.997511	0.00842058	33		0.999356	0.00359736	21		1.00113	0.00566597	27
1.25005	1.00092	0.0035809	14		0.997827	0.00164068	13		1.00311	0.00620819	13			1.25001	0.996669	0.00893127	33		1.00086	0.00511032	21		1.00007	0.00616961	27
1.30008	1.0018	0.00420199	14		0.999191	0.002694	13		0.997215	0.00557494	13			1.30011	0.995418	0.0118219	33		0.99874	0.00365646	21		1.00072	0.00424836	27
1.35031	0.999872	0.00340254	14		0.999761	0.00278471	13		1.00057	0.0074584	13			1.35018	0.995022	0.0121379	33		0.999349	0.00394062	21		0.997805	0.00832309	27
1.40012	0.999665	0.00266472	14		1.00005	0.00238963	13		1.03477	0.0813887	13			1.40024	0.995946	0.0129322	33		1.00137	0.004114	21		0.999076	0.00477348	27
1.45021	1.00035	0.00370442	14		0.997835	0.00298834	13		0.995509	0.0111195	13			1.45001	0.996551	0.0110269	33		1.00234	0.00553493	21		0.99981	0.00668412	27
1.50029	1.00108	0.00389458	14		0.999238	0.00207066	13		1.00166	0.00715429	13			1.50025	0.997254	0.00719496	33		1.00097	0.0026385	21		0.997577	0.00458949	27
1.55031	0.999067	0.00337891	14		1.00067	0.00253571	13		1.00418	0.00722261	13			1.55025	1.00098	0.00651513	33		0.998475	0.00387757	21		0.998496	0.00525677	27
1.60025	1.00038	0.00339037	14		1.00038	0.00198966	13		1.00652	0.00975373	13			1.60005	0.999563	0.00667317	33		0.999298	0.00310599	21		0.99952	0.00717566	27
1.65008	0.999842	0.00363835	14		0.999991	0.00288484	13		1.00283	0.0080368	13			1.65008	1.00015	0.00613824	33		1.00054	0.00240116	21		1.00063	0.00649176	27
1.70011	1.00005	0.00390588	14		0.999005	0.0013332	13		1.00467	0.00602642	13			1.70003	0.99923	0.00665664	33		0.997529	0.00382099	21		0.997567	0.00672574	27
1.75016	1.00055	0.00280895	14		1.00099	0.00238642	13		1.0005	0.00691047	13			1.7501	0.998593	0.00798376	33		1.00009	0.00498061	21		1.00175	0.00879649	27
1.80026	0.998359	0.00344273	14		1.00034	0.00234303	13		1.0007	0.00867252	13			1.80006	1.00164	0.00615602	33		0.999098	0.00412964	21		1.00139	0.00452884	27
1.85017	0.997002	0.00378609	14		1.00003	0.00185506	13		0.999651	0.00954889	13			1.85011	1.00039	0.00833386	33		0.995108	0.00354245	21		1.00177	0.00680697	27
1.90024	0.998371	0.00366853	14		1.00001	0.0021817	13		0.996981	0.00677434	13			1.90018	1.00152	0.00522631	33		1.00191	0.00353772	21		0.999952	0.00580676	27
1.95013	1.00039	0.00451655	14		0.999981	0.00269615	13		1.00043	0.00570739	13			1.95024	1.0004	0.00676891	33		1.002	0.00352176	21		1.00082	0.00530366	27
2.00017	0.997475	0.00475697	14		1.00011	0.00245183	13		1.005	0.00619933	13			2.00002	1.00263	0.0052518	33		0.997515	0.00427175	21		0.999866	0.00715334	27
2.05017	0.998686	0.00364307	14		1.00012	0.00233422	13		0.998776	0.0049657	13			2.05024	1.00035	0.00668107	33		1.00009	0.00386062	21		1.00067	0.00542106	27
2.10023	0.999652	0.00414603	14		1.0003	0.00253163	13		1.0017	0.0068851	13			2.10017	1.00198	0.00685536	33		1.00248	0.00271824	21		1.00276	0.00556257	27
2.15024	0.998736	0.00456505	14		1.00075	0.00252383	13		0.999707	0.00663263	13			2.15002	1.00201	0.00387617	33		1.00077	0.00454439	21		1.00444	0.00645073	27
2.2001	0.997929	0.00547504	14		0.999952	0.00174729	13		0.999069	0.00485285	13			2.2001	1.00314	0.00613831	33		1.00218	0.00530715	21		1.00281	0.00776219	27
2.25019	0.998758	0.00511623	14		1.00006	0.0014142	13		1.00102	0.00592732	13			2.25007	1.00348	0.00645369	33		0.998272	0.00277377	21		1.00077	0.00901133	27
2.30019	0.99802	0.00414698	14		1.00041	0.00187734	13		1.00089	0.00626031	13			2.30014	1.00107	0.00646315	33		1.00335	0.0034371	21		1.00049	0.00789886	27
2.35005	0.998544	0.00590481	14		0.999979	0.0016957	13		1.00019	0.00424451	13			2.3501	1.00375	0.00895208	33		1.00015	0.00386983	21		1.00114	0.0054696	27
2.4001	0.997065	0.00782081	14		1.00043	0.00176077	13		0.999358	0.00291425	13			2.40011	1.00237	0.00447446	33		1.00061	0.00292197	21		1.00333	0.0079899	27
2.45011	0.99827	0.00636702	14		1.00043	0.00206561	13		1.00147	0.00838524	13			2.4502	1.00132	0.00609103	33		1.00255	0.00316868	21		1.00434	0.00585013	27
2.50022	0.996172	0.00754884	14		1.00092	0.00252115	13		0.997962	0.0103393	13			2.50016	0.999357	0.00618314	33		1.00019	0.00383693	21		1.00159	0.00667548	27
2.5501	0.995651	0.00722337	14		1.00094	0.00147243	13		1.00084	0.00584753	13			2.55018	1.00482	0.00724456	33		1.00168	0.00544838	21		1.00187	0.00612681	27
2.6001	0.995068	0.00634923	14		0.999564	0.0018825	13		1.00165	0.00722065	13			2.60018	1.0026	0.00629131	33		0.999802	0.00276464	21		1.00227	0.00574145	27
2.65014	0.996084	0.00791717	14		0.999682	0.00190272	13		1.00192	0.00804487	13			2.6501	0.99958	0.0107951	33		1.00147	0.00391069	21		1.00335	0.00532428	27
2.70029	0.995886	0.00885636	14		1.00051	0.00157466	13		0.997539	0.0099067	13			2.70012	1.00141	0.00529337	33		1.00008	0.00311505	21		1.0017	0.00752488	27
2.7501	0.997013	0.00896387	14		1.00044	0.00141765	13		1.00095	0.00556115	13			2.75012	1.00395	0.00483176	33		1.00117	0.00356105	21		1.00137	0.00639181	27
2.80016	0.995027	0.0103991	14		0.99937	0.00159286	13		0.998373	0.00573229	13			2.80013	1.00372	0.00542519	33		1.00345	0.00473407	21		1.00129	0.00696675	27
2.85013	0.995681	0.00985338	14		0.999837	0.00280925	13		0.999894	0.00524963	13			2.85026	1.00154	0.00552612	33		0.998745	0.00318173	21		1.00003	0.00577485	27
2.9002	0.995642	0.0116023	14		1.00002	0.0015153	13		1.00151	0.00475324	13			2.90021	1.00348	0.00844676	33		1.00197	0.00328344	21		1.00003	0.00604911	27
2.95026	0.995131	0.0109889	14		1.00031	0.00178029	13		0.998655	0.00775993	13			2.95014	1.00075	0.00722864	33		1.0031	0.00380705	21		1.00371	0.00721771	27
3.00016	0.996071	0.00950189	14		0.999829	0.00262304	13		0.999931	0.00316999	13			3.00021	1.0036	0.00666519	33		1.00177	0.00367789	21		1.00074	0.00669898	27
3.0503	0.993124	0.0121631	14		1.00101	0.00165533	13		1.00113	0.00712443	13			3.05018	1.00446	0.0076396	33		0.999059	0.00302217	21		1.00118	0.00911179	27
3.10016	0.994287	0.0108472	14		1.0006	0.00217872	13		1.00069	0.00492067	13			3.10014	1.00427	0.00549733	33		1.00192	0.00492447	21		1.00177	0.00621058	27
3.15023	0.99422	0.0126851	14		0.998285	0.00247305	13		0.99922	0.00354156	13			3.15022	1.00412	0.00617163	33		1.00137	0.00443449	21		1.00281	0.00780983	27
3.20021	0.993897	0.0137201	14		0.999838	0.00244387	13		0.997575	0.00463685	13			3.20002	1.00351	0.00467341	33		1.00083	0.00225851	21		0.999259	0.00719599	27
3.25027	0.992721	0.0140691	14		0.999836	0.00118571	13		0.998664	0.00299994	13			3.25024	1.00375	0.0079238	33		1.00059	0.0038789	21		1.00056	0.00491721	27
3.30019	0.992521	0.0157408	14		1.0006	0.00187855	13		1.00115	0.00434517	13			3.30023	1.00364	0.00754445	33		0.999482	0.00404509	21		0.998335	0.00793253	27
3.35025	0.99262	0.0140727	14		0.999521	0.00230907	13		1.00164	0.00532074	13			3.35012	1.00383	0.00565452	33		1.0016	0.00453226	21		0.99977	0.00462661	27
3.40028	0.99329	0.015154	14		0.999383	0.00201668	13		0.997939	0.007444	13			3.40018	1.00291	0.0080473	33		0.998471	0.0031771	21		1.00172	0.00523398	27
3.45031	0.994412	0.0154005	14		0.99939	0.00170819	13		1.00578	0.00731295	13			3.45023	1.0033	0.00568253	33		1.00278	0.00385123	21		0.999936	0.0039822	27
3.5002	0.991994	0.0149778	14		0.999076	0.00146314	13		1.00252	0.00706474	13			3.50011	1.0052	0.0108148	33		1.00122	0.00430695	21		0.999857	0.00446048	27
3.55014	0.992273	0.0149714	14		1.00024	0.0017895	13		1.00738	0.00363261	13			3.55009	1.00316	0.00706997	33		1.00153	0.00282379	21		1.00032	0.00525057	27
3.60022	0.993203	0.0154737	14		0.999975	0.00185923	13		1.00186	0.00696617	13			3.60016	1.00448	0.00929774	33		1.00208	0.00391222	21		1.00017	0.00441541	27
3.65014	0.992479	0.0152162	14		0.999361	0.00250146	13		1.00101	0.00762189	13			3.65014	1.002	0.00573531	33		1.00304	0.00482067	21		1.00085	0.00612887	27
3.70022	0.993649	0.0151084	14		0.99897	0.00217112	13		1.00285	0.00373755	13			3.70018	1.00406	0.00920138	33		1.0037	0.00276072	21		1.00345	0.00548821	27
3.75014	0.993375	0.0145702	14		1.00072	0.00141862	13		1.00096	0.00480276	13			3.75023	1.00271	0.00832306	33		1.00054	0.00222587	21		1.00231	0.00489726	27
3.80031	0.990754	0.0156143	14		0.999486	0.00134011	13		1.00073	0.00785612	13			3.80004	1.00407	0.0102246	33		1.00161	0.00556052	21		1.00019	0.00462145	27
3.85025	0.994899	0.0159298	14		0.999994	0.00164757	13		1.00352	0.00393687	13			3.85017	1.00172	0.00708792	33		1.00046	0.0040495	21		1.00208	0.00577829	27
3.90028	0.993183	0.0135614	14		1.00069	0.00178694	13		0.999833	0.00551018	13			3.90001	1.00209	0.00498165	33		1.00134	0.00368751	21		1.00056	0.00589383	27
3.95008	0.994579	0.0160754	14		1.00063	0.00211859	13		1.00233	0.00469247	13			3.95008	1.00264	0.00629162	33		1.00284	0.00465475	21		1.00159	0.00723541	27
4.0002	0.992817	0.0152225	14		1.00023	0.00164192	13		1.00193	0.00736074	13			4.00016	1.0026	0.00673336	33		1.00157	0.00340741	21		1.00063	0.00569818	27
4.0501	0.9918	0.0155416	14		1.00049	0.00119257	13		1.00072	0.0056928	13			4.05026	1.00188	0.00717047	33		1.00267	0.00335969	21		1.00127	0.00444915	27
4.10011	0.99227	0.0164436	14		0.999549	0.00178123	13		1.00114	0.00688292	13			4.10006	1.00274	0.00963836	33		0.998908	0.0039763	21		1.0025	0.00520289	27
4.15029	0.993854	0.0142249	14		0.999946	0.00173177	13		1.0026	0.00448965	13			4.1501	0.999821	0.00515036	33		0.999931	0.00242362	21		0.999999	0.0054643	27
4.2003	0.993309	0.0155764	14		0.999009	0.00137605	13		0.999396	0.00655395	13			4.20015	0.998022	0.00428128	33		1.00099	0.00316064	21		0.997124	0.00612211	27
4.25017	0.992826	0.0157135	14		0.999629	0.00160095	13		1.00143	0.00652884	13			4.25026	1.00309	0.00763056	33		1.00143	0.00370126	21		0.999797	0.00797499	27
4.30011	0.992692	0.0159141	14		0.99953	0.00280489	13		1.00393	0.00543782	13			4.30027	1.00239	0.00892562	33		1.00161	0.003604	21		1.00342	0.00650958	27
4.35009	0.991597	0.0156971	14		1.00005	0.00179877	13		1.00011	0.0035422	13			4.35007	1.00095	0.00509752	33		0.998716	0.00328647	21		1.00129	0.00453434	27
4.40014	0.991553	0.0160771	14		0.999294	0.00130806	13		0.999562	0.00517986	13			4.40016	1.00215	0.00674049	33		0.997407	0.00486436	21		1.00012	0.00584725	27
4.45029	0.99194	0.0148268	14		0.998683	0.00152299	13		0.998881	0.00456725	13			4.45003	1.00161	0.00649426	33		0.999768	0.00356451	21		0.99959	0.00521468	27
4.50024	0.991926	0.0169729	14		1.00095	0.00193804	13		1.00029	0.00596349	13			4.50003	0.998766	0.00561598	33		1.00055	0.00355021	21		0.998839	0.00853466	27
4.55025	0.991962	0.0164604	14		0.999505	0.00137619	13		0.998449	0.0049498	13			4.55016	0.996469	0.00551289	33		0.997887	0.00288516	21		1.00219	0.00693573	27
4.60013	0.991248	0.0165711	14		0.999151	0.0021981	13		1.00176	0.00579352	13			4.60026	1.00244	0.00904793	33		0.997843	0.00335051	21		0.998428	0.00796666	27
4.65021	0.991573	0.0158105	14		1.00035	0.00212962	13		1.00015	0.00436742	13			4.65006	0.999783	0.0101937	33		1.00117	0.00485948	21		1.00091	0.00558188	27
4.70018	0.991735	0.0153199	14		1.00007	0.00157839	13		0.999192	0.0046392	13			4.70019	0.99909	0.0073212	33		0.999819	0.00363615	21		1.00064	0.0072824	27
4.75014	0.991397	0.0173278	14		0.999524	0.00277231	13		0.998023	0.00586125	13			4.75033	0.9986	0.00507865	33		1.00126	0.00381136	21		0.999908	0.00761749	27
4.80021	0.992173	0.0153483	14		0.998702	0.00174211	13		1.00027	0.00575821	13			4.80003	0.999548	0.0064991	33		0.998392	0.00309126	21		0.999415	0.00782992	27
4.85006	0.992108	0.0164731	14		0.99942	0.00177272	13		1.00087	0.00494308	13			4.85015	0.999357	0.0108739	33		0.997617	0.00412463	21		0.999107	0.00646779	27
4.90032	0.992632	0.0171329	14		0.999486	0.0014333	13		0.998886	0.00604049	13			4.90014	0.99825	0.0109256	33		0.998206	0.00355976	21		0.999858	0.00773595	27
4.95029	0.989986	0.0153691	14		0.999554	0.00134027	13		0.9987	0.00350153	13			4.95003	0.995188	0.00792385	33		0.99847	0.0033653	21		0.996924	0.00828758	27
5.00029	0.991262	0.015282	14		0.99797	0.00230544	13		0.995713	0.00700837	13			5.00006	0.993439	0.00767505	33		0.996255	0.00490902	21		0.996545	0.00800026	27
5.05006	0.991624	0.0176563	14		1.00006	0.00254246	13		0.996644	0.00586039	13			5.05	0.992733	0.0084256	33		0.996772	0.0052296	21		0.998985	0.00813946	27
5.1003	0.992655	0.0166317	14		0.999516	0.00135861	13		0.996784	0.0058189	13			5.10008	0.994462	0.00748729	33		0.998769	0.00348331	21		0.99687	0.00779609	27
5.15037	0.992578	0.0167709	14		0.999607	0.00205623	13		0.99537	0.00702593	13			5.15017	0.994078	0.00793833	33		0.995717	0.00323627	21		0.996781	0.00681972	27
5.20029	0.994593	0.0192396	14		0.998431	0.0012558	13		0.996834	0.0040141	13			5.2002	0.991481	0.0101913	33		0.995446	0.00472066	21		0.996989	0.00861845	27
5.25007	0.993593	0.0188073	14		0.999607	0.00151198	13		0.998745	0.00778071	13			5.2502	0.992809	0.00993098	33		0.993718	0.00489895	21		0.997267	0.010039	27
5.30016	0.998414	0.0259485	14		0.998542	0.00159646	13		0.999662	0.0083406	13			5.30025	0.993932	0.00770409	33		0.995867	0.00510084	21		0.995711	0.0102384	27
5.35005	0.999269	0.0271871	14		0.998059	0.00157683	13		0.995985	0.00906917	13			5.35007	0.991459	0.0106571	33		0.993638	0.00714768	21		0.995801	0.0111132	27
5.40013	0.999263	0.0252709	14		0.999053	0.00193652	13		0.999027	0.0054568	13			5.40013	0.992327	0.00947912	33		0.997354	0.00714308	21		0.995275	0.0116595	27
5.4503	0.997936	0.0254101	14		0.998724	0.00228058	13		0.995854	0.00798194	13			5.45016	0.997019	0.0114155	33		0.996729	0.00784802	21		0.997489	0.0127339	27
5.50006	0.998317	0.0238444	14		0.999751	0.00171205	13		0.997856	0.00600342	13			5.50017	1.01888	0.0401595	33		0.998702	0.0100462	21		0.996188	0.0134522	27
5.55023	0.99566	0.0207916	14		0.99882	0.00204274	13		0.998645	0.00583752	13			5.55014	1.05548	0.0934349	33		0.993791	0.00985013	21		0.995804	0.0217973	27
5.60013	0.994463	0.0184084	14		0.998896	0.0033136	13		0.999528	0.00608654	13			5.60002	1.07053	0.121263	33		0.996141	0.0138361	21		1.00131	0.0170747	27
5.6502	0.995042	0.0193175	14		0.999629	0.00326926	13		0.997299	0.00543894	13			5.65006	1.08076	0.128119	33		0.994283	0.0135462	21		1.00225	0.0174943	27
5.70028	0.993477	0.0193978	14		0.999068	0.00202695	13		0.997233	0.0112075	13			5.7001	1.08313	0.127491	33		0.993428	0.0141656	21		1.00263	0.0183762	27
5.75009	0.993221	0.0203781	14		0.999473	0.0022425	13		1.00046	0.00858864	13			5.75006	1.08315	0.127529	33		0.992576	0.0121898	21		1.00377	0.0219321	27
5.80023	0.995026	0.01945	14		0.999605	0.00338199	13		1.00104	0.00527249	13			5.80017	1.08412	0.123519	33		0.994787	0.0116204	21		1.00801	0.0237094	27
5.8503	0.996288	0.0193268	14		0.999127	0.00315706	13		1.00199	0.00710162	13			5.85017	1.07718	0.116894	33		0.996242	0.0120833	21		1.00255	0.0226522	27
5.90031	0.996738	0.0199744	14		1.00095	0.00264163	13		1.00406	0.00883041	13			5.90016	1.06894	0.101533	33		0.997454	0.0117374	21		1.00081	0.0233712	27
5.95028	0.996681	0.0192875	14		1.00007	0.00292851	13		1.00458	0.00968444	13			5.95011	1.0604	0.0835384	33		0.994747	0.0146886	21		0.998451	0.0253086	27
6.00007	0.996664	0.0217215	14		1.00036	0.00179406	13		1.00603	0.012057	13			6.00025	1.05154	0.0675861	33		0.992235	0.015281	21		0.996183	0.0251011	27
6.05012	0.996583	0.0210058	14		0.999592	0.00275212	13		1.00493	0.0114969	13			6.05026	1.03781	0.0493267	33		0.98997	0.0167086	21		0.990321	0.0269037	27
6.10014	0.995729	0.02096	14		0.999824	0.0028793	13		1.00132	0.0113069	13			6.10006	1.0292	0.030708	33		0.987422	0.0188789	21		0.988265	0.0286781	27
6.1502	0.996573	0.0209496	14		1.00019	0.00297486	13		1.00046	0.0126326	13			6.15009	1.0209	0.0253216	33		0.984325	0.0215034	21		0.983122	0.0310284	27
6.20023	0.994098	0.0196586	14		1.00004	0.00305028	13		1.00143	0.00941244	13			6.20012	1.01268	0.0274018	33		0.977966	0.0234355	21		0.975808	0.0319355	27
6.25006	0.99645	0.0206377	14		1.00099	0.00307399	13		0.998713	0.00789839	13			6.25021	1.00296	0.0294536	33		0.972961	0.0250678	21		0.971348	0.0348476	27
6.30017	0.995097	0.0204705	14		1.00008	0.00342594	13		1.00081	0.00944936	13			6.30021	0.997633	0.0367103	33		0.9692	0.0289354	21		0.965629	0.0411615	27
6.35018	0.994437	0.0208831	14		1.00045	0.0035076	13		1.00021	0.00990479	13			6.35022	0.991239	0.0416233	33		0.961617	0.0305756	21		0.955459	0.0455437	27
6.4003	0.993886	0.0196229	14		0.999734	0.00296496	13		1.00747	0.00999699	13			6.40003	0.985977	0.0478993	33		0.959255	0.0346237	21		0.945701	0.0532211	27
6.45028	0.995922	0.0209066	14		0.99957	0.00290965	13		1.00306	0.00497039	13			6.45035	0.980691	0.0473908	33		0.95098	0.0378566	21		0.941812	0.0600587	27
6.50029	0.9936	0.0182858	14		0.999752	0.00289102	13		1.00131	0.0102488	13			6.50015	0.978747	0.0553113	33		0.945324	0.0396986	21		0.932144	0.0664837	27
6.55006	0.993572	0.0195834	14		0.999479	0.00157088	13		0.997652	0.015133	13			6.55018	0.971453	0.0579167	33		0.940973	0.0424717	21		0.925549	0.0699455	27
6.60037	0.994112	0.0184925	14		1.00004	0.00287842	13		1.00372	0.0101811	13			6.6002	0.97083	0.0625024	33		0.931963	0.0471157	21		0.91637	0.0735466	27
6.65016	0.991004	0.0190335	14		0.999512	0.00283596	13		1.00026	0.00721928	13			6.65018	0.962782	0.0608348	33		0.929231	0.0488397	21		0.908361	0.0775281	27
6.70026	0.992487	0.0180492	14		0.998392	0.00247389	13		1.00234	0.00880975	13			6.70014	0.957266	0.0644296	33		0.921395	0.0502143	21		0.903696	0.0817906	27
6.75015	0.992668	0.0175916	14		0.998664	0.00325774	13		0.999222	0.0080898	13			6.75018	0.951112	0.0632327	33		0.913361	0.0524443	21		0.892091	0.085322	27
6.80012	0.991718	0.0185567	14		0.999237	0.00416235	13		1.00149	0.00817538	13			6.80016	0.94491	0.0662781	33		0.909456	0.0560283	21		0.884709	0.088422	27
6.8503	0.990914	0.0181083	14		0.998904	0.00282807	13		0.999728	0.00580387	13			6.85018	0.941625	0.0645782	33		0.903401	0.058674	21		0.876908	0.0916936	27
6.90005	0.991913	0.0190472	14		0.999533	0.00299206	13		1.0022	0.00815936	13			6.90018	0.934245	0.0651597	33		0.899483	0.0602472	21		0.869827	0.0914756	27
6.95024	0.992038	0.0195661	14		0.997701	0.00341454	13		0.997772	0.00534329	13			6.95001	0.929745	0.0658866	33		0.892222	0.0628397	21		0.862023	0.095711	27
7.00024	0.992027	0.0173214	14		0.998771	0.00373806	13		0.998494	0.0048958	13			7.00001	0.923339	0.0641843	33		0.885943	0.0628464	21		0.855695	0.0955069	27
7.05023	0.990062	0.0185138	14		0.999088	0.00322106	13		0.998686	0.0111901	13			7.05006	0.917353	0.0630001	33		0.87903	0.0659858	21		0.850363	0.0987607	27
7.10012	0.989466	0.0191025	14		0.998278	0.00281886	13		0.995839	0.00674364	13			7.10011	0.911315	0.0637802	33		0.876362	0.0657916	21		0.841824	0.097525	27
7.15008	0.990097	0.0189082	14		0.998825	0.0036276	13		0.996842	0.00999135	13			7.15014	0.903152	0.0621085	33		0.868789	0.0683804	21		0.836006	0.0986732	27
7.20027	0.990229	0.0200245	14		0.998533	0.0041434	13		0.992854	0.00789686	13			7.20018	0.900952	0.0637416	33		0.862001	0.0683247	21		0.831237	0.0972002	27
7.25021	0.988601	0.0191265	14		0.998411	0.00249572	13		0.99854	0.00939838	13			7.25022	0.892078	0.0618691	33		0.857765	0.0698113	21		0.823859	0.0975082	27
7.30024	0.990314	0.0197674	14		0.99856	0.00241715	13		0.996429	0.00738325	13			7.30004	0.886393	0.0607161	33		0.852166	0.0694268	21		0.821619	0.0970386	27
7.35028	0.987896	0.0189891	14		0.998979	0.00330493	13		0.993785	0.00784367	13			7.35008	0.883558	0.0613742	33		0.848557	0.0720804	21		0.815199	0.0962963	27
7.40026	0.988686	0.0193059	14		0.999684	0.00313374	13		0.994648	0.00766156	13			7.40019	0.875083	0.0586954	33		0.843631	0.0712679	21		0.808787	0.0975202	27
7.45016	0.988178	0.0192937	14		0.998685	0.00292495	13		0.996267	0.00639038	13			7.45022	0.871939	0.059999	33		0.839041	0.0713209	21		0.802458	0.0961072	27
7.5002	0.988871	0.0184302	14		0.999458	0.0040105	13		0.995538	0.0142306	13			7.50025	0.866227	0.0605933	33		0.834096	0.0727267	21		0.798827	0.0949777	27
7.55021	0.988581	0.0192958	14		0.999021	0.00348012	13		0.993404	0.0131414	13			7.55008	0.864217	0.064865	33		0.828494	0.0720567	21		0.79323	0.0956293	27
7.60027	0.989913	0.0184854	14		0.999118	0.00371128	13		0.997842	0.00715742	13			7.6002	0.854954	0.0601151	33		0.824785	0.0725933	21		0.788854	0.0941257	27
7.65006	0.987952	0.0197915	14		0.998701	0.00339629	13		0.995151	0.0146442	13			7.65012	0.85346	0.0612612	33		0.817037	0.0699389	21		0.784558	0.0935172	27
7.70019	0.988955	0.0185734	14		0.997794	0.00386539	13		0.995552	0.00983143	13			7.7	0.85082	0.0640514	33		0.816944	0.0730272	21		0.781802	0.0941336	27
7.75016	0.988791	0.0188275	14		0.998835	0.0029648	13		0.996263	0.010323	13			7.75014	0.848131	0.0663747	33		0.811184	0.0718485	21		0.776146	0.0919116	27
7.80017	0.98775	0.0181673	14		0.999542	0.00388733	13		0.992776	0.00999428	13			7.80018	0.842337	0.0664667	33		0.807003	0.0722746	21		0.775872	0.0915957	27
7.85018	0.987881	0.0183098	14		0.998689	0.00332294	13		0.992276	0.010432	13			7.85017	0.838541	0.0706217	33		0.802131	0.0705989	21		0.769149	0.092266	27
7.90024	0.985529	0.0198853	14		0.998993	0.00284896	13		0.991326	0.0124396	13			7.90027	0.834802	0.0676827	33		0.801435	0.0699638	21		0.767055	0.0927659	27
7.95006	0.987247	0.0186883	14		0.998692	0.00406779	13		0.990869	0.0120891	13			7.95004	0.829715	0.0708288	33		0.795719	0.0708528	21		0.76288	0.0913045	27
8.00005	0.987025	0.0185146	14		0.997732	0.00279488	13		0.990343	0.0132939	13			8.0001	0.828087	0.0719456	33		0.789955	0.0701046	21		0.75972	0.0922579	27
8.05013	0.988122	0.0186577	14		0.997941	0.00420953	13		0.992461	0.0120995	13			8.05011	0.82402	0.0751684	33		0.789661	0.0712591	21		0.758722	0.0923298	27
8.10026	0.985683	0.0183018	14		0.997948	0.00277752	13		0.988752	0.0122684	13			8.10015	0.821242	0.0705693	33		0.785829	0.0717961	21		0.755369	0.0922745	27
8.1501	0.988362	0.0195676	14		0.997227	0.00377172	13		0.989823	0.0131314	13			8.15016	0.818722	0.0734308	33		0.781127	0.0712352	21		0.753277	0.0924396	27
8.20019	0.987703	0.0199293	14		0.998332	0.00378569	13		0.990884	0.0106958	13			8.20025	0.814141	0.0740145	33		0.779102	0.0697057	21		0.75119	0.0903231	27
8.25022	0.987912	0.0190911	14		1.00018	0.00411568	13		0.989839	0.0153659	13			8.25001	0.812224	0.0773172	33		0.774749	0.0693886	21		0.747797	0.0889619	27
8.30008	0.986228	0.0201785	14		0.997117	0.00354678	13		0.98885	0.00933372	13			8.30025	0.810562	0.0782191	33		0.772652	0.0695601	21		0.744984	0.0894473	27
8.35012	0.985102	0.0185055	14		0.99807	0.00312001	13		0.991353	0.00968939	13			8.35003	0.806019	0.0757528	33		0.770876	0.0680137	21		0.743544	0.0890226	27
8.4001	0.986349	0.0195724	14		0.998526	0.00366866	13		0.990069	0.0100522	13			8.4001	0.80637	0.0784221	33		0.769181	0.0674572	21		0.742339	0.0892845	27
8.45017	0.987781	0.0189445	14		0.99835	0.00278546	13		0.988737	0.0110667	13			8.45016	0.805178	0.0817973	33		0.764723	0.0681341	21		0.738532	0.0910165	27
8.50024	0.985657	0.0196837	14		0.998573	0.00399728	13		0.990735	0.0105936	13			8.50021	0.799289	0.0762576	33		0.764085	0.0683938	21		0.736938	0.0904139	27
8.55026	0.986573	0.0196819	14		0.997766	0.00335329	13		0.989512	0.0126164	13			8.55014	0.799401	0.0803549	33		0.761003	0.0685999	21		0.737714	0.0907278	27
8.60019	0.988139	0.0209071	14		0.997925	0.00354917	13		0.986895	0.0160436	13			8.60024	0.7985	0.0827427	33		0.761978	0.0681256	21		0.736388	0.091987	27
8.6502	0.987586	0.0200835	14		0.998363	0.0048211	13		0.983921	0.0083672	13			8.65022	0.796743	0.0837877	33		0.758514	0.0682756	21		0.73336	0.0906873	27
8.70022	0.986558	0.0193886	14		0.997622	0.00423069	13		0.99218	0.0116154	13			8.70009	0.792326	0.0804351	33		0.756037	0.0703366	21		0.732302	0.0893853	27
8.75025	0.987207	0.0195205	14		0.997448	0.00374719	13		0.987727	0.0132536	13			8.75001	0.79064	0.081284	33		0.754906	0.0672987	21		0.728498	0.0904438	27
8.80025	0.986585	0.0190812	14		0.997331	0.00354857	13		0.986341	0.01293	13			8.8	0.790538	0.0857412	33		0.753146	0.0694414	21		0.730204	0.0903393	27
8.8501	0.986689	0.0197828	14		0.998354	0.00323768	13		0.986091	0.0151575	13			8.85009	0.786577	0.0815404	33		0.752172	0.0692607	21		0.727846	0.0901722	27
8.90043	0.987081	0.0202987	14		0.997932	0.00485369	13		0.987433	0.0139487	13			8.90014	0.786327	0.0839242	33		0.750821	0.0701707	21		0.729158	0.0910598	27
8.9502	0.986153	0.0209345	14		0.997143	0.00355245	13		0.984939	0.0105617	13			8.95011	0.783452	0.0821991	33		0.749135	0.0705151	21		0.727128	0.0896826	27
9.00012	0.985744	0.0207837	14		0.998289	0.00447626	13		0.980368	0.0167095	13			9.00003	0.784138	0.084782	33		0.748829	0.0711078	21		0.727117	0.090462	27
9.05009	0.986864	0.0203189	14		0.998401	0.00542321	13		0.987441	0.014263	13			9.05018	0.783656	0.0841067	33		0.747156	0.0691839	21		0.724767	0.0900781	27
9.10018	0.986795	0.0195348	14		0.998306	0.00360609	13		0.983931	0.015723	13			9.10004	0.779438	0.0878943	33		0.748823	0.0697568	21		0.724354	0.0911698	27
9.1503	0.985581	0.0204037	14		0.997892	0.00405313	13		0.986314	0.0141721	13			9.15013	0.780425	0.0882868	33		0.746207	0.0721145	21		0.722608	0.0909909	27
9.2002	0.987192	0.0213499	14		0.998715	0.00450035	13		0.9845	0.0171188	13			9.20007	0.780302	0.0878822	33		0.745905	0.0729063	21		0.725554	0.0900811	27
9.25013	0.986592	0.0206631	14		0.99754	0.0047823	13		0.981197	0.0148035	13			9.25025	0.774824	0.0835332	33		0.744423	0.0741059	21		0.723049	0.0899633	27
9.30017	0.98823	0.0204267	14		0.997409	0.00461977	13		0.985897	0.0151228	13			9.30004	0.773586	0.085578	33		0.746205	0.0736215	21		0.722653	0.0905657	27
9.35027	0.986742	0.02163	14		0.997719	0.00508521	13		0.983244	0.0195062	13			9.35017	0.774949	0.088481	33		0.744586	0.0744145	21		0.721733	0.0917029	27
9.40022	0.986957	0.0211464	14		0.997724	0.00522884	13		0.987765	0.0175972	13			9.40021	0.773443	0.0871169	33		0.745689	0.0745099	21		0.719535	0.0920795	27
9.45043	0.987214	0.0216487	14		0.997509	0.0062577	13		0.98685	0.0153582	13			9.45005	0.771204	0.0882197	33		0.743251	0.0752699	21		0.719987	0.0921539	27
9.50018	0.986114	0.0211219	14		0.997651	0.00501146	13		0.984261	0.0155768	13			9.50016	0.771599	0.0896649	33		0.744854	0.0750955	21		0.720435	0.0910674	27
9.55012	0.985662	0.0194772	14		0.997495	0.0057394	13		0.985504	0.011708	13			9.55006	0.770076	0.0879537	33		0.742481	0.0791473	21		0.719395	0.0919468	27
9.60014	0.985401	0.0206634	14		0.997561	0.00539216	13		0.982305	0.0137762	13			9.60019	0.770181	0.089956	33		0.742794	0.0776053	21		0.717165	0.0911662	27
9.65007	0.98614	0.0223173	14		0.997674	0.00493234	13		0.985906	0.0145988	13			9.65011	0.76816	0.0925293	33		0.743673	0.0781968	21		0.717484	0.0931132	27
9.7003	0.985694	0.0202221	14		0.997322	0.00553427	13		0.981077	0.0148883	13			9.70019	0.766961	0.0907581	33		0.743344	0.0807239	21		0.716567	0.0949259	27
9.75005	0.985076	0.0208222	14		0.996573	0.00539536	13		0.983238	0.017362	13			9.75002	0.768553	0.0947194	33		0.74195	0.0789782	21		0.717178	0.0934944	27
9.80024	0.986353	0.0218316	14		0.99749	0.0052081	13		0.98005	0.0157687	13			9.80015	0.767677	0.0930243	33		0.742136	0.079407	21		0.717047	0.0917786	27
9.85024	0.986765	0.0220028	14		0.997809	0.0051856	13		0.984921	0.0161612	13			9.85002	0.765865	0.0926909	33		0.74149	0.0827697	21		0.714528	0.0915553	27
9.90015	0.986368	0.0204872	14		0.99707	0.00481466	13		0.984609	0.0157521	13			9.90004	0.764358	0.0926758	33		0.738913	0.0819847	21		0.713901	0.092936	27
9.95016	0.985933	0.0214664	14		0.996949	0.00665136	13		0.986821	0.0144492	13			9.95018	0.76293	0.0949695	33		0.741831	0.0816615	21		0.71691	0.0952303	27
10.0002	0.987884	0.0218951	14		0.997261	0.00514349	13		0.981177	0.0196266	13			10.0001	0.763225	0.0954101	33		0.742469	0.083107	21		0.714585	0.0937118	27
10.0503	0.986252	0.0221473	14		0.997612	0.00534831	13		0.983304	0.0162786	13			10.0502	0.760906	0.0918426	33		0.740811	0.0841348	21		0.714256	0.0938031	27
10.1004	0.986433	0.0205551	14		0.996588	0.00473465	13		0.982471	0.0206487	13			10.1001	0.762893	0.0949833	33		0.739628	0.0823405	21		0.713708	0.0945487	27
10.1503	0.986286	0.020626	14		0.998101	0.00684134	13		0.986165	0.0177386	13			10.15	0.759936	0.0942885	33		0.739431	0.0839496	21		0.711499	0.0944961	27
10.2003	0.984797	0.0201283	14		0.997416	0.0059625	13		0.985503	0.0196327	13			10.2001	0.761512	0.0982013	33		0.741354	0.0849144	21		0.713113	0.0969639	27
10.2502	0.986554	0.0213563	14		0.997445	0.00644733	13		0.982538	0.0164683	13			10.25	0.759052	0.0961135	33		0.737844	0.0853539	21		0.712763	0.0959365	27
10.3003	0.986585	0.0229819	14		0.997731	0.00595873	13		0.982249	0.0177494	13			10.3001	0.759646	0.0971397	33		0.737691	0.086475	21		0.715881	0.0960366	27
10.3503	0.987137	0.0207591	14		0.99765	0.00517385	13		0.984524	0.0164665	13			10.35	0.758252	0.101002	33		0.73583	0.0849737	21		0.713506	0.0959242	27
10.4003	0.986404	0.0209318	14		0.997554	0.00558576	13		0.982002	0.0192889	13			10.4	0.758382	0.0970422	33		0.736271	0.0863794	21		0.714088	0.0955262	27
10.4501	0.98535	0.0220672	14		0.997443	0.0063814	13		0.985714	0.0167006	13			10.4502	0.753604	0.0934218	33		0.736293	0.0860291	21		0.714591	0.0974339	27
10.5001	0.986109	0.0223156	14		0.998255	0.00615089	13		0.980307	0.0198835	13			10.5001	0.757747	0.0990317	33		0.736625	0.0870084	21		0.712487	0.0973571	27
10.5502	0.986042	0.0211704	14		0.997357	0.00736567	13		0.979225	0.0183207	13			10.55	0.758153	0.100901	33		0.734853	0.0863892	21		0.713001	0.097096	27
10.6001	0.984548	0.0217722	14		0.996915	0.00635518	13		0.98173	0.0159687	13			10.6001	0.756053	0.0999932	33		0.735633	0.0872623	21		0.713548	0.0971344	27
10.6501	0.985436	0.0215428	14		0.997641	0.00569509	13		0.980237	0.0215854	13			10.65	0.753833	0.0973563	33		0.736049	0.0855492	21		0.714064	0.0980158	27
10.7	0.984527	0.0215441	14		0.997783	0.00650727	13		0.98035	0.019341	13			10.7002	0.754503	0.0994026	33		0.736798	0.0877142	21		0.713942	0.100957	27
10.7502	0.986614	0.021505	14		0.996214	0.00524286	13		0.978655	0.0200359	13			10.75	0.752883	0.0999404	33		0.73457	0.087384	21		0.712629	0.0997254	27
10.8003	0.98464	0.0213909	14		0.997924	0.00595801	13		0.980496	0.0215133	13			10.8002	0.75231	0.0979325	33		0.733926	0.0885894	21		0.712	0.0979421	27
10.8502	0.984285	0.0222076	14		0.99694	0.00681753	13		0.979406	0.0214324	13			10.8501	0.755166	0.10131	33		0.735301	0.0883469	21		0.712167	0.0996136	27
10.9002	0.983296	0.0221355	14		0.997067	0.00687427	13		0.978223	0.0201775	13			10.9001	0.752726	0.101741	33		0.733013	0.0890389	21		0.712361	0.0984525	27
10.9503	0.983143	0.0226586	14		0.998415	0.0065693	13		0.978888	0.0207801	13			10.9501	0.756211	0.106772	33		0.732847	0.0895263	21		0.712724	0.0987241	27
11.0001	0.983299	0.0222453	14		0.996844	0.00513041	13		0.976863	0.0187175	13			11	0.756098	0.104628	33		0.733129	0.0894681	21		0.712579	0.100477	27
11.0501	0.984261	0.0211194	14		0.997842	0.00666032	13		0.975466	0.0147195	13			11.0501	0.754604	0.104144	33		0.733116	0.0893618	21		0.711097	0.09982	27
11.1002	0.98322	0.0211829	14		0.998833	0.00694774	13		0.977503	0.0194509	13			11.1	0.754245	0.105033	33		0.733417	0.0902285	21		0.714742	0.100239	27
11.1503	0.985323	0.0212421	14		0.997247	0.0068388	13		0.97717	0.0247259	13			11.1502	0.752233	0.104035	33		0.732274	0.0915887	21		0.709466	0.100945	27
11.2003	0.983014	0.0225686	14		0.998086	0.00755505	13		0.98203	0.0206121	13			11.2001	0.754085	0.106793	33		0.73235	0.0887088	21		0.711762	0.102053	27
11.2501	0.984734	0.0222871	14		0.997721	0.00685909	13		0.977302	0.0213133	13			11.2501	0.749202	0.102995	33		0.733361	0.0900729	21		0.712948	0.100552	27
11.3003	0.98358	0.0220055	14		0.996429	0.00642375	13		0.978357	0.0180925	13			11.3002	0.751513	0.106701	33		0.732745	0.0909879	21		0.713498	0.100704	27
11.3502	0.984827	0.0207618	14		0.997261	0.00713475	13		0.976228	0.0243313	13			11.3501	0.751991	0.105912	33		0.730733	0.0899491	21		0.711642	0.102023	27
11.4002	0.983326	0.0228444	14		0.996909	0.00727075	13		0.979333	0.0231916	13			11.4002	0.750171	0.103856	33		0.729884	0.0909315	21		0.711434	0.101199	27
11.4502	0.984382	0.0223147	14		0.997365	0.00739083	13		0.981056	0.0236573	13			11.4501	0.752508	0.106143	33		0.731692	0.0902806	21		0.712115	0.102155	27
11.5002	0.986262	0.0235212	14		0.99668	0.00796898	13		0.976755	0.0238766	13			11.5002	0.752153	0.109792	33		0.728975	0.090254	21		0.711753	0.102155	27
11.5501	0.984455	0.0233385	14		0.997917	0.00721247	13		0.97397	0.0235776	13			11.55	0.749806	0.10586	33		0.731235	0.0925822	21		0.713149	0.102482	27
11.6	0.985274	0.023693	14		0.99653	0.00689559	13		0.979076	0.0233952	13			11.6001	0.749754	0.108184	33		0.731136	0.0914443	21		0.711689	0.104572	27
11.6502	0.98382	0.0226067	14		0.99626	0.00724468	13		0.978126	0.0230813	13			11.6503	0.751497	0.108686	33		0.728618	0.0887551	21		0.713773	0.105425	27
11.7002	0.983287	0.0225629	14		0.997956	0.00707701	13		0.97725	0.0269244	13			11.7002	0.745367	0.105565	33		0.72924	0.09236	21		0.71355	0.10326	27
11.7502	0.984254	0.0238772	14		0.998104	0.00833729	13		0.976844	0.0229176	13			11.7501	0.745315	0.101335	33		0.730396	0.0919869	21		0.712483	0.104461	27
11.8004	0.98423	0.0228444	14		0.996921	0.00676126	13		0.979928	0.0258731	13			11.8	0.74502	0.104449	33		0.729124	0.0907848	21		0.711502	0.10475	27
11.85	0.983696	0.0223318	14		0.996972	0.00746968	13		0.979742	0.0264062	13			11.8501	0.744926	0.101652	33		0.729229	0.0914508	21		0.71284	0.104583	27
11.9003	0.984887	0.0224005	14		0.997023	0.0080428	13		0.978043	0.0246387	13			11.9002	0.744437	0.102978	33		0.726821	0.0910087	21		0.713568	0.105125	27
11.9503	0.983334	0.0235146	14		0.996505	0.00766287	13		0.976524	0.0252349	13			11.95	0.74232	0.100868	33		0.726477	0.0918982	21		0.711853	0.105171	27
12.0003	0.982879	0.0245761	14		0.99857	0.00743217	13		0.973134	0.0218208	13			12.0001	0.74465	0.102676	33		0.724985	0.0896819	21		0.714447	0.106031	27
12.0503	0.981294	0.024779	14		0.997669	0.00778139	13		0.972038	0.0215882	13			12.0501	0.745135	0.106261	33		0.725689	0.0902751	21		0.712189	0.106306	27
12.1001	0.98368	0.0238296	14		0.996133	0.00779733	13		0.972376	0.0233202	13			12.1003	0.746547	0.107577	33		0.725749	0.0903443	21		0.712906	0.106809	27
12.1503	0.983123	0.0230292	14		0.998513	0.00811175	13		0.971607	0.0251928	13			12.1502	0.744096	0.105547	33		0.727378	0.0928822	21		0.713821	0.109771	27
12.2001	0.982914	0.0235113	14		0.998181	0.0081359	13		0.975661	0.0235339	13			12.2002	0.746459	0.105947	33		0.72584	0.0916165	21		0.713027	0.108651	27
12.2501	0.983641	0.0240778	14		0.998379	0.00783157	13		0.973366	0.0253	13			12.2501	0.744072	0.107215	33		0.72559	0.090616	21		0.712743	0.10774	27
12.3003	0.983041	0.0235462	14		0.997192	0.00833819	13		0.974548	0.0276695	13			12.3002	0.74396	0.104922	33		0.724577	0.0916948	21		0.713431	0.108685	27
12.35	0.983434	0.024029	14		0.997168	0.00859608	13		0.968442	0.017026	13			12.3502	0.746644	0.109217	33		0.721984	0.0916938	21		0.713624	0.109464	27
12.4003	0.984201	0.0240369	14		0.997015	0.00858067	13		0.975361	0.0232637	13			12.4001	0.74574	0.109835	33		0.724969	0.0895324	21		0.713907	0.108743	27
12.4504	0.987331	0.0253805	14		0.996939	0.00671717	13		0.975189	0.0230102	13			12.4503	0.743569	0.106525	33		0.724391	0.0876361	21		0.713318	0.108622	27
12.5001	0.985919	0.0257603	14		0.997983	0.00737555	13		0.977769	0.0241774	13			12.5002	0.743402	0.105154	33		0.721778	0.090864	21		0.712633	0.111323	27
12.5502	0.984588	0.0239287	14		0.9973	0.00777858	13		0.979384	0.0206685	13			12.55	0.744236	0.108731	33		0.722146	0.0899733	21		0.71255	0.112029	27
12.6001	0.981926	0.0257147	14		0.996801	0.0073356	13		0.979269	0.0218513	13			12.6001	0.744143	0.107285	33		0.722645	0.0894757	21		0.712961	0.112929	27
12.6501	0.98401	0.025296	14		0.997692	0.00897588	13		0.974076	0.0223131	13			12.65	0.745766	0.110865	33		0.723779	0.0923521	21		0.714661	0.114584	27
12.7	0.98417	0.0260276	14		0.997781	0.00791666	13		0.97488	0.0206839	13			12.7001	0.747592	0.113311	33		0.720705	0.0894798	21		0.713418	0.115306	27
12.7502	0.984193	0.0248662	14		0.996312	0.008224	13		0.977124	0.0267743	13			12.7502	0.747935	0.116237	33		0.721586	0.0905462	21		0.713988	0.113758	27
12.8002	0.98417	0.0247965	14		0.996077	0.00748368	13		0.974316	0.0235649	13			12.8001	0.74939	0.116978	33		0.724579	0.0906204	21		0.71502	0.112161	27
12.8502	0.984649	0.0247103	14		0.997445	0.00804435	13		0.975491	0.0247292	13			12.8502	0.747428	0.116582	33		0.721768	0.0900935	21		0.711754	0.114909	27
12.9001	0.984431	0.0244508	14		0.997993	0.00761022	13		0.972312	0.024223	13			12.9	0.747299	0.114921	33		0.718905	0.0899935	21		0.714895	0.114042	27
12.9501	0.983515	0.0257331	14		0.996773	0.00845854	13		0.972714	0.0250293	13			12.9501	0.748808	0.117244	33		0.720143	0.0906414	21		0.714676	0.115705	27
13.0002	0.985234	0.0253702	14		0.996731	0.00879762	13		0.975902	0.0246938	13			13.0002	0.748669	0.119023	33		0.71904	0.0904862	21		0.715246	0.116677	27
13.0502	0.983105	0.0257236	14		0.996847	0.0094488	13		0.975009	0.0268545	13			13.0501	0.747515	0.115419	33		0.719859	0.0902007	21		0.714121	0.115163	27
13.1002	0.984801	0.0243771	14		0.996151	0.00795322	13		0.97527	0.0259657	13			13.1	0.748506	0.119358	33		0.719676	0.0899743	21		0.714304	0.115271	27
13.1502	0.983653	0.024935	14		0.997836	0.00848734	13		0.976314	0.0224839	13			13.1501	0.750844	0.12228	33		0.718437	0.0908997	21		0.714573	0.116455	27
13.2002	0.983741	0.0253305	14		0.998131	0.00882098	13		0.977831	0.0275768	13			13.2001	0.747384	0.117452	33		0.72033	0.0904454	21		0.714275	0.117943	27
13.2502	0.982988	0.0264585	14		0.997234	0.00887164	13		0.975653	0.0199456	13			13.2502	0.748909	0.120656	33		0.718747	0.0894759	21		0.713352	0.117096	27
13.3002	0.9837	0.0249529	14		0.996386	0.00905624	13		0.975083	0.0217018	13			13.3002	0.746025	0.118901	33		0.718391	0.0897181	21		0.71412	0.117615	27
13.3502	0.983179	0.024956	14		0.996441	0.00880886	13		0.972626	0.0305187	13			13.3503	0.746771	0.12112	33		0.717632	0.0910327	21		0.714378	0.116922	27
13.4002	0.983802	0.0247419	14		0.996379	0.00798305	13		0.973272	0.0260851	13			13.4001	0.748465	0.123921	33		0.719197	0.0898178	21		0.713856	0.116525	27
13.4501	0.982571	0.0256858	14		0.995872	0.0083636	13		0.973107	0.0235293	13			13.4502	0.74808	0.121888	33		0.71811	0.0908998	21		0.713676	0.119937	27
13.5001	0.984107	0.0273117	14		0.99765	0.00857519	13		0.971742	0.0224307	13			13.5001	0.749682	0.123481	33		0.718477	0.0918568	21		0.714202	0.117975	27
13.5501	0.984438	0.0251972	14		0.996964	0.00879018	13		0.972079	0.0216064	13			13.5502	0.748855	0.122447	33		0.717965	0.0910838	21		0.714732	0.119611	27
13.6002	0.982464	0.0263762	14		0.99759	0.00802359	13		0.972289	0.0258377	13			13.6001	0.747903	0.121827	33		0.716333	0.0905737	21		0.715543	0.119265	27
13.6501	0.983016	0.0259796	14		0.997145	0.00834229	13		0.970825	0.0283374	13			13.6502	0.749356	0.122152	33		0.718744	0.0908254	21		0.71662	0.119709	27
13.7003	0.981963	0.0256921	14		0.997554	0.00815107	13		0.974449	0.0275603	13			13.7001	0.746995	0.122938	33		0.715688	0.0909789	21		0.71755	0.119406	27
13.7503	0.984182	0.0278528	14		0.997139	0.00892696	13		0.97167	0.0205726	13			13.75	0.748289	0.126878	33		0.71519	0.0916186	21		0.714422	0.120806	27
13.8002	0.98483	0.0280775	14		0.997085	0.00855863	13		0.972532	0.026234	13			13.8001	0.748888	0.123753	33		0.714472	0.0909541	21		0.715426	0.122963	27
13.8502	0.982036	0.0280772	14		0.997537	0.00852725	13		0.971142	0.025732	13			13.85	0.749879	0.126975	33		0.715435	0.0904797	21		0.717299	0.121716	27
13.9002	0.983125	0.0274302	14		0.997625	0.00931861	13		0.970474	0.0250828	13			13.9002	0.748711	0.125909	33		0.71559	0.0922565	21		0.715023	0.123624	27
13.9501	0.984326	0.0277943	14		0.997085	0.00830023	13		0.970675	0.0248173	13			13.95	0.747174	0.126002	33		0.715411	0.0910387	21		0.71646	0.122967	27
14.0001	0.982681	0.0277347	14		0.997286	0.00925396	13		0.968419	0.015773	13			14.0002	0.74992	0.125909	33		0.714757	0.0930073	21		0.716073	0.125262	27
14.0501	0.982711	0.0280572	14		0.997857	0.00875376	13		0.968473	0.0254174	13			14.0501	0.747873	0.127177	33		0.716831	0.0904656	21		0.716532	0.125935	27
14.1002	0.983777	0.0275224	14		0.997491	0.00949238	13		0.966713	0.0243292	13			14.1	0.749403	0.12701	33		0.715821	0.0908588	21		0.715785	0.126689	27
14.1503	0.983887	0.0271906	14		0.997489	0.00891413	13		0.971316	0.0279716	13			14.1502	0.747538	0.12691	33		0.713788	0.0908647	21		0.716307	0.126537	27
14.2001	0.984203	0.0279479	14		0.997238	0.00882776	13		0.968188	0.0263771	13			14.2	0.748459	0.128619	33		0.712574	0.0904523	21		0.715499	0.125665	27
14.2502	0.984022	0.0272261	14		0.997256	0.00819635	13		0.967923	0.0268734	13			14.2501	0.750294	0.130458	33		0.713891	0.091863	21		0.717151	0.126389	27
14.3002	0.984583	0.0290151	14		0.996964	0.00945234	13		0.969111	0.0295072	13			14.3003	0.748651	0.129652	33		0.71343	0.0935959	21		0.715646	0.128636	27
14.3503	0.981428	0.0273267	14		0.996608	0.00955261	13		0.967287	0.026349	13			14.35	0.749132	0.129404	33		0.715588	0.0917688	21		0.716324	0.126831	27
14.4002	0.98373	0.0279549	14		0.998005	0.00912324	13		0.96486	0.0309663	13			14.4	0.748506	0.127916	33		0.712887	0.0903652	21		0.717189	0.127325	27
14.4503	0.983277	0.0284038	14		0.99725	0.0103243	13		0.969061	0.0290675	13			14.45	0.745038	0.127418	33		0.711551	0.0922175	21		0.715959	0.12996	27
14.5001	0.978022	0.0303003	14		0.998317	0.00937798	13		0.966768	0.0306311	13			14.5003	0.750422	0.132178	33		0.714199	0.0922416	21		0.719229	0.129311	27
14.5503	0.980955	0.0278758	14		0.997975	0.00932317	13		0.966799	0.0299512	13			14.55	0.748435	0.131717	33		0.711912	0.0930868	21		0.716757	0.132056	27
14.6001	0.982698	0.029211	14		0.996902	0.00935306	13		0.96775	0.0299068	13			14.6002	0.747873	0.12896	33		0.713474	0.0925617	21		0.716539	0.131709	27
14.6501	0.982899	0.0297549	14		0.997779	0.00922463	13		0.965367	0.0303188	13			14.65	0.746724	0.128874	33		0.713591	0.0940902	21		0.717929	0.132535	27
14.7003	0.98231	0.0315635	14		0.997608	0.00989313	13		0.963794	0.0300677	13			14.7002	0.746196	0.129187	33		0.71265	0.0936544	21		0.721032	0.138434	27
14.75	0.982223	0.0301566	14		0.998053	0.0091359	13		0.962368	0.0307272	13			14.75	0.747572	0.130348	33		0.711786	0.0935239	21		0.721193	0.138232	27
14.8002	0.983501	0.0295996	14		0.999004	0.00982264	13		0.963357	0.0304868	13			14.8003	0.750451	0.134637	33		0.712053	0.0927347	21		0.717153	0.132831	27
14.8502	0.98239	0.030101	14		0.997606	0.00910543	13		0.964815	0.0316765	13			14.85	0.751584	0.135067	33		0.712696	0.0947874	21		0.719507	0.134701	27
14.9002	0.980629	0.0306548	14		0.998577	0.00945684	13		0.963874	0.0278921	13			14.9002	0.748436	0.135207	33		0.713499	0.0939306	21		0.719874	0.132726	27
14.9502	0.980847	0.0311121	14		0.99697	0.0102513	13		0.965966	0.031169	13			14.9502	0.749791	0.134069	33		0.710532	0.0933694	21		0.718105	0.126079	27
15.0001														15.0002	0.750215	0.134779	33		0.711477	0.0938016	21		0.714093	0.117163	27

## Sheet: Fig.4H
MDA-MB-453
ctrl	+ PAX	+ IBTX
0.0594033	0.0140857	0.194856
0.0461908	0.0242989	0.2811
0.114825	0.0196081	0.0994087
0.0560725	0.0123503	0.181764
0.0455149	0.0121613	0.186309
0.0367433	0.0232168	0.174624
0.0312341	0.0151751	0.203436
0.0290216	0.0151866	0.0371129
0.0545182	0.0139326	0.185489
0.044159	0.00705633	0.00872905
0.283764	0.0560895	-0.0591496
0.194229	0.0258342	0.0580844
0.0720211	0.0583192	0.0277741
0.0657036

## Sheet: Fig.4I
	-Glucose														+Oligomycin-A
	MCF-7 ctrl				MCF-7 + BKCa - RFP				MCF-7 + BKCa-DEC - RFP						MCF-7 ctrl				MCF-7 + BKCa - RFP				MCF-7 + BKCa-DEC - RFP
Time (min)	Average	SD	N (cells)		Average	SD	N (cells)		Average	SD	N (cells)			Time (min)	Average	SD	N (cells)		Average	SD	N (cells)		Average	SD	N (cells)
0	1.00417	0.00858871	48		1.00425	0.00767362	23		1.00362	0.00515805	20			0	1.00557	0.0069889	27		1.00918	0.0103235	23		1.005	0.00491539	37
0.0502517	1.00061	0.00530392	48		0.998541	0.0086701	23		1.00182	0.00399054	20			0.0501017	1.00412	0.00457429	27		1.00094	0.00694238	23		1.00263	0.00442277	37
0.100172	1.00101	0.0066597	48		1.00254	0.00612044	23		1.00079	0.00340338	20			0.100157	1.00045	0.0042945	27		1.00327	0.00507125	23		1.00287	0.0051423	37
0.150158	1.0014	0.0109336	48		1.00159	0.00542503	23		0.999317	0.00434044	20			0.15024	1.00061	0.00414599	27		0.999705	0.00354569	23		1.00119	0.00336249	37
0.200145	0.999558	0.00555679	48		0.999067	0.00550443	23		1.00035	0.00360788	20			0.200057	0.998574	0.00527326	27		1.00006	0.00453907	23		0.999898	0.00370979	37
0.250138	1.0006	0.00566246	48		1.00181	0.00441544	23		1.00007	0.00361677	20			0.250253	0.999074	0.00309156	27		0.99645	0.00426152	23		0.997886	0.00252506	37
0.300125	0.9971	0.0108728	48		0.99687	0.00551937	23		0.999277	0.00389498	20			0.300142	0.998833	0.00245462	27		0.999553	0.00273412	23		0.997845	0.00377306	37
0.350117	1	0.00439506	48		0.99927	0.00484456	23		1.00087	0.00320152	20			0.350063	0.998899	0.00299715	27		0.996292	0.00460355	23		0.998233	0.00296666	37
0.400112	0.998228	0.00448523	48		0.999546	0.0061429	23		1.00199	0.00559567	20			0.400208	0.999853	0.00332143	27		0.999502	0.00490979	23		0.999641	0.0037729	37
0.450098	0.999161	0.00427671	48		1.00164	0.00507513	23		0.998772	0.00335344	20			0.450198	0.998895	0.00248683	27		0.999276	0.00326369	23		0.998633	0.00255343	37
0.500087	1.00079	0.00499305	48		0.997451	0.00434064	23		0.998883	0.00352978	20			0.500017	0.999034	0.00359486	27		0.996543	0.00692213	23		0.999297	0.00294499	37
0.550195	0.998856	0.00383644	48		0.999199	0.00438779	23		0.99972	0.00381124	20			0.550175	0.998761	0.00360677	27		0.999438	0.0038105	23		0.999776	0.00294872	37
0.600125	0.999027	0.00410971	48		0.998724	0.00424183	23		0.998253	0.00214332	20			0.600253	0.999508	0.00362447	27		0.997746	0.00398895	23		0.998056	0.00316074	37
0.650112	0.998193	0.00428588	48		1.00173	0.0066415	23		1	0.00243462	20			0.65002	0.999015	0.00397719	27		1.0015	0.00667472	23		0.998158	0.00463007	37
0.700102	0.998615	0.00743374	48		1.00018	0.00655575	23		0.998054	0.00327895	20			0.700085	1.00007	0.00269249	27		1.00045	0.00466739	23		0.998771	0.00371	37
0.750107	0.999453	0.00528687	48		0.998585	0.0062068	23		0.997467	0.00372991	20			0.750183	0.999333	0.00317731	27		0.999121	0.00683272	23		0.999151	0.00374332	37
0.800093	0.999733	0.00665364	48		0.997011	0.00686478	23		1.0004	0.00333382	20			0.800082	0.999616	0.00278497	27		0.998716	0.00502269	23		0.998699	0.00300479	37
0.850087	0.997881	0.00534657	48		0.999488	0.00666923	23		0.998964	0.00273374	20			0.850112	1.00003	0.00396381	27		0.998968	0.00537353	23		0.998706	0.00409762	37
0.900073	1.00161	0.00651824	48		1.00076	0.0057449	23		0.998103	0.00357099	20			0.900253	0.999214	0.00274978	27		1.00105	0.00546454	23		0.999929	0.00369826	37
0.950128	0.998353	0.00575406	48		0.993098	0.0174443	23		0.999644	0.00269355	20			0.950042	1	0.00320534	27		0.998855	0.00384088	23		1.00032	0.00333192	37
1.00012	0.997704	0.00975293	48		0.99993	0.00349057	23		0.999337	0.00316338	20			1.00021	0.997242	0.00396336	27		0.999085	0.00614573	23		0.998715	0.00314116	37
1.05011	1.00144	0.00404092	48		0.998214	0.00460288	23		0.999003	0.00292442	20			1.05023	1.00124	0.00246199	27		0.998386	0.00549098	23		1.00043	0.00330258	37
1.1002	1.00098	0.00368797	48		1.00061	0.00760771	23		1.00021	0.00329671	20			1.10024	1.0006	0.00209799	27		0.997316	0.00388894	23		0.998543	0.00327969	37
1.15019	0.999618	0.00344525	48		1.0003	0.00468284	23		0.999024	0.00434192	20			1.15024	0.997274	0.00428731	27		1.00001	0.00287549	23		0.999725	0.00327816	37
1.20018	1.00097	0.00781165	48		0.997664	0.00619557	23		0.999569	0.00388081	20			1.20008	0.999445	0.00419742	27		0.997933	0.00449264	23		1.00007	0.00430591	37
1.25022	1.0007	0.00366662	48		1.00069	0.00638076	23		0.99916	0.00294053	20			1.2502	0.999505	0.00174151	27		1.0008	0.00463406	23		0.999014	0.00334891	37
1.30021	1.00155	0.00706138	48		0.997388	0.00679126	23		1.00176	0.00380469	20			1.30004	0.999884	0.00232272	27		1.00142	0.00500802	23		1.00039	0.00419739	37
1.35019	0.998539	0.00632491	48		1.00036	0.0050896	23		0.999621	0.002876	20			1.35007	0.998206	0.00360805	27		0.999933	0.00490302	23		1.00076	0.00364093	37
1.40021	0.997583	0.00744655	48		0.99979	0.00457705	23		1.0012	0.00378822	20			1.4001	1.00008	0.00317088	27		1.00024	0.00435151	23		0.999208	0.00306068	37
1.4502	0.999385	0.00648659	48		1.00018	0.00487801	23		1.00014	0.0029332	20			1.45019	1.00098	0.00230158	27		0.998733	0.00445309	23		1.00073	0.00281991	37
1.50019	1.00146	0.0103846	48		0.9994	0.00637104	23		0.999501	0.00333185	20			1.50021	0.999735	0.00340982	27		1.00106	0.00483065	23		1.00847	0.0203187	37
1.55017	1.00184	0.00573529	48		0.997262	0.00680598	23		0.999867	0.00498193	20			1.55014	0.998656	0.00312744	27		1.00144	0.00462449	23		0.998905	0.00508419	37
1.60005	1.00213	0.00411526	48		0.997946	0.00436956	23		0.999391	0.00338751	20			1.60024	0.999357	0.00254543	27		0.999994	0.00749002	23		1.0007	0.00413624	37
1.65004	1.00159	0.00447945	48		0.998725	0.00472808	23		1.00001	0.00342011	20			1.65005	0.997901	0.00516131	27		1.00126	0.00696773	23		0.999965	0.00430911	37
1.70003	1.00094	0.00547898	48		1.00043	0.00487234	23		1.00233	0.00383177	20			1.70014	0.999803	0.0032869	27		0.998084	0.00354789	23		1.00003	0.00287158	37
1.75004	1.0023	0.00371547	48		0.999924	0.0054692	23		0.999229	0.00305361	20			1.75023	1.00063	0.0030707	27		1.00009	0.00597819	23		0.999618	0.00329595	37
1.80001	1.00166	0.00548902	48		1.00023	0.00370301	23		0.998366	0.00332433	20			1.80003	1.00149	0.00406356	27		0.998292	0.00546256	23		0.99948	0.00327245	37
1.85011	1.00268	0.00691839	48		0.99754	0.00457715	23		1.00183	0.00253255	20			1.85011	1.00094	0.00503656	27		0.999943	0.00639823	23		0.999617	0.00337826	37
1.90017	1.00118	0.00666987	48		1.00005	0.00783225	23		1.00001	0.00278618	20			1.90001	1.00079	0.00380952	27		1.00007	0.00846659	23		1.00035	0.00458024	37
1.95012	1.00065	0.0109672	48		1.00149	0.00514695	23		1.00182	0.0031911	20			1.95004	0.999769	0.00370127	27		0.99876	0.00611668	23		0.999455	0.00391887	37
2.00011	1.00098	0.00745667	48		1.00016	0.00601878	23		1.00025	0.00250839	20			2.00013	0.999952	0.00339876	27		0.999757	0.00683058	23		0.999664	0.00512077	37
2.05024	0.997134	0.00984667	48		1.00164	0.00438063	23		1.00048	0.00275673	20			2.05005	1.00076	0.00308316	27		1.00238	0.00801469	23		0.999904	0.00470456	37
2.10016	1.00036	0.00373007	48		1.00149	0.00449766	23		1.00159	0.00341675	20			2.10013	1.00168	0.00317338	27		0.997696	0.00650608	23		1.00044	0.00334071	37
2.15026	0.998124	0.00566687	48		1.00117	0.0073889	23		0.996722	0.00425455	20			2.15024	0.999519	0.00304208	27		0.999835	0.00727985	23		1.00022	0.00357114	37
2.20024	1.00211	0.00604987	48		1.0014	0.0055882	23		1.00132	0.00275634	20			2.20003	0.999772	0.00278011	27		1.0016	0.00418054	23		0.999431	0.00383282	37
2.25019	0.99802	0.00538407	48		0.997263	0.00594272	23		1.00048	0.00280617	20			2.25022	1.00166	0.00414373	27		1.0007	0.0052131	23		1.00084	0.00286723	37
2.30011	1.00088	0.00462344	48		0.998764	0.0045524	23		0.999381	0.00306033	20			2.30016	1.00148	0.00399797	27		1.00153	0.00378217	23		1.00006	0.00403985	37
2.3501	1.00147	0.0072818	48		0.999755	0.00552675	23		0.999549	0.00230161	20			2.35006	0.999664	0.00382113	27		1.00318	0.00653142	23		1.00021	0.00410746	37
2.40009	0.998493	0.00623779	48		1.00221	0.00507379	23		1.00063	0.00154789	20			2.40006	0.999838	0.00195549	27		0.999305	0.00543769	23		1.00145	0.00295199	37
2.45001	1.00005	0.0049916	48		1.00109	0.00639798	23		1.00052	0.00318135	20			2.45018	1.00146	0.00386987	27		0.99778	0.0054784	23		1.00041	0.00384871	37
2.50026	0.997831	0.00394318	48		1.0012	0.00581362	23		1.00172	0.00350508	20			2.50001	0.99838	0.00390142	27		0.999888	0.00327561	23		1.00112	0.00328604	37
2.55025	0.999635	0.00455107	48		1.00062	0.00487633	23		0.999316	0.00458186	20			2.5501	1.00017	0.00211306	27		0.998892	0.00588884	23		0.99918	0.00405558	37
2.60022	0.99965	0.00631447	48		1.00257	0.00709533	23		1.00024	0.00250141	20			2.60004	1.00106	0.00262323	27		1.00336	0.00543031	23		1.00067	0.0042009	37
2.65021	1.00036	0.00336832	48		1.00037	0.0082386	23		0.998821	0.00394373	20			2.65002	0.998918	0.00301732	27		0.998427	0.00790185	23		0.998966	0.00369383	37
2.70025	1.002	0.00420942	48		1.00457	0.00738526	23		0.999022	0.00399687	20			2.70022	0.999879	0.0022318	27		1.00323	0.00467048	23		1.00027	0.0042127	37
2.75024	0.997764	0.00697313	48		1.00288	0.00526408	23		1.0004	0.00312869	20			2.75016	1.00042	0.00284912	27		0.999909	0.00499574	23		1.00012	0.00308566	37
2.80024	1.00103	0.00664519	48		1.00412	0.0075197	23		1.00093	0.00320305	20			2.80004	1.001	0.00414239	27		0.99874	0.00502547	23		1.00173	0.00287265	37
2.85017	1.00075	0.0053425	48		1.00172	0.00636851	23		1.00114	0.00461473	20			2.85012	1.00126	0.0023054	27		1.00056	0.00475515	23		1.00043	0.00328437	37
2.90015	0.999059	0.00502845	48		1.0006	0.00513514	23		1.0012	0.00321703	20			2.90013	1.00064	0.0021917	27		0.999705	0.0042758	23		1.00119	0.00322069	37
2.95017	1.00074	0.00781332	48		0.999966	0.00623433	23		1.00141	0.00441063	20			2.95003	0.999971	0.00339593	27		0.999547	0.00430826	23		1.00038	0.00392714	37
3.00016	0.999531	0.00548292	48		0.999451	0.00806696	23		1.00069	0.00348874	20			3.00004	0.99987	0.00239275	27		1.00055	0.00284755	23		1.00197	0.0031414	37
3.05004	0.999101	0.00507183	48		1.00167	0.0046129	23		0.999412	0.00329858	20			3.0502	1.00103	0.00326761	27		1.00066	0.00432015	23		1.00062	0.00403901	37
3.10018	0.997918	0.00625038	48		0.998083	0.00586107	23		0.998344	0.00400309	20			3.10001	0.999711	0.00315791	27		0.999355	0.0051237	23		1.0003	0.00288122	37
3.15017	0.999118	0.00646465	48		0.999233	0.00532622	23		0.999384	0.00478793	20			3.15013	0.999579	0.00308767	27		1.00222	0.00666349	23		1.0004	0.00364569	37
3.20016	0.997877	0.00775641	48		0.999089	0.0196318	23		1.0008	0.00316089	20			3.20015	0.999378	0.00287666	27		1.00014	0.00485181	23		1.0003	0.00249799	37
3.25014	0.999087	0.00600156	48		1.00051	0.00646946	23		0.999969	0.00254648	20			3.25024	0.999507	0.00238641	27		1.00055	0.00766946	23		1.00075	0.00321645	37
3.30008	1.00015	0.00601125	48		0.999223	0.00508811	23		0.9996	0.00476154	20			3.30009	1.00201	0.00336351	27		0.998748	0.00507095	23		1.00282	0.00322867	37
3.35006	0.999111	0.00408036	48		1.00123	0.00468161	23		0.997774	0.00350571	20			3.35017	1.0008	0.00281721	27		1.00139	0.00393801	23		1.00022	0.00352623	37
3.40005	1.00093	0.00458506	48		0.997992	0.00436999	23		0.999878	0.00326359	20			3.40014	1.00064	0.00236679	27		1.00028	0.00446433	23		0.999565	0.00323182	37
3.45015	0.999081	0.00833704	48		1.00065	0.00568116	23		0.999055	0.00263802	20			3.45008	1.00042	0.00243421	27		0.999271	0.00449411	23		0.999038	0.00403794	37
3.50014	1.00036	0.0057402	48		1.0009	0.00485003	23		0.999873	0.00218504	20			3.50009	1.00177	0.00277103	27		0.999882	0.00535475	23		1.00245	0.00390397	37
3.55012	0.998476	0.00721874	48		1.00136	0.00709023	23		0.999465	0.0036846	20			3.55019	0.999465	0.00295886	27		1.00058	0.00377352	23		1.00093	0.00334075	37
3.60023	0.998292	0.0113284	48		1.00107	0.00586917	23		1.00024	0.00248102	20			3.60002	1.00257	0.00469832	27		1.00105	0.00521106	23		0.999474	0.00311752	37
3.65013	1.00262	0.00681212	48		1.00158	0.00411349	23		1.00182	0.00309229	20			3.6501	1.00152	0.00308068	27		1.00078	0.00499202	23		0.999919	0.00257591	37
3.70011	0.996511	0.00679965	48		1.00257	0.0102952	23		1.00036	0.00410001	20			3.70019	0.999835	0.00236652	27		1.00129	0.00365818	23		0.999906	0.0026772	37
3.75019	1.00112	0.00518418	48		1.0004	0.00789752	23		0.999551	0.00258942	20			3.75001	1.00155	0.00347465	27		1.00256	0.00587896	23		1.00163	0.00369493	37
3.80013	1.00111	0.00500258	48		1.00033	0.0042865	23		1.00129	0.00383813	20			3.80015	0.999011	0.00376506	27		1.00141	0.00701768	23		1.00027	0.00458858	37
3.8502	0.998835	0.00651343	48		1.00136	0.00689905	23		0.998846	0.00322029	20			3.8502	1.00056	0.00282467	27		1.00094	0.0062366	23		0.99894	0.00312643	37
3.90019	1.00003	0.00529948	48		1.00073	0.00747961	23		1.0034	0.00514454	20			3.90009	1.0003	0.0029156	27		0.999852	0.00463515	23		1.00004	0.00382891	37
3.95008	0.997541	0.00670864	48		0.999764	0.00655394	23		1.00167	0.00381704	20			3.9501	1.00016	0.00215554	27		0.998232	0.0062105	23		0.999845	0.00300625	37
4.00007	0.999501	0.00417694	48		1.00025	0.0053853	23		0.999929	0.00214899	20			4.00013	0.999741	0.00349522	27		0.998938	0.00417674	23		1.00004	0.00318935	37
4.05009	1.0007	0.00526863	48		1.00024	0.00419259	23		0.998955	0.00265969	20			4.05002	1.00193	0.00439997	27		0.997163	0.00560536	23		0.99917	0.00316926	37
4.10008	1.00036	0.00419632	48		1.00024	0.00598582	23		1.00112	0.00286317	20			4.10005	1.00058	0.00312093	27		1.00034	0.00539057	23		0.999457	0.00374049	37
4.15008	1.00192	0.00503379	48		1.00134	0.00638615	23		1.00046	0.00305858	20			4.15013	1.00143	0.00330225	27		0.99954	0.00434806	23		0.999873	0.00387772	37
4.20028	0.998709	0.00429256	48		1.00019	0.00480976	23		1.00006	0.00213843	20			4.20001	1.00008	0.00243183	27		1.00094	0.00626435	23		0.99941	0.00283912	37
4.25001	1.00018	0.00474157	48		0.999563	0.01041	23		0.99949	0.00281104	20			4.25004	0.99817	0.00299438	27		1.00154	0.00718745	23		1.00095	0.00400962	37
4.30006	0.999802	0.00522034	48		0.997137	0.00881287	23		1.00353	0.00452578	20			4.30017	1.00195	0.00473903	27		0.998522	0.00440234	23		1.00126	0.00297246	37
4.35005	1.00151	0.00277593	48		1.00033	0.00473626	23		0.998232	0.00347976	20			4.35026	0.998333	0.00301953	27		0.999557	0.00479587	23		1.00049	0.00309941	37
4.40003	0.999907	0.00415416	48		1.00216	0.0062756	23		1.00113	0.00363261	20			4.4002	0.999177	0.0031838	27		1.0003	0.003402	23		1.00167	0.00419457	37
4.45002	1.0019	0.00484909	48		0.997962	0.00755677	23		1.00176	0.00388745	20			4.45012	0.997865	0.00413333	27		1.00179	0.00457588	23		1.00012	0.00291557	37
4.50003	0.999697	0.00643862	48		1.00083	0.0062183	23		1.0014	0.00457948	20			4.50018	0.999067	0.00256118	27		0.998374	0.00591762	23		1.00033	0.00475963	37
4.55002	1.00063	0.00465951	48		0.999927	0.00577354	23		1.00007	0.00339082	20			4.55006	0.999738	0.00177371	27		0.999624	0.00505813	23		0.99932	0.00433207	37
4.60001	1.00102	0.00454851	48		0.997251	0.00548084	23		1.00107	0.00314114	20			4.6002	0.999488	0.00236828	27		1.00076	0.00471638	23		0.999808	0.00337749	37
4.6502	1.00091	0.00568363	48		0.997247	0.00705368	23		1.00023	0.0037162	20			4.6502	0.998694	0.00338552	27		1.0011	0.00392875	23		1.00024	0.00314265	37
4.70014	1.00126	0.00576107	48		1.00117	0.00445406	23		0.998817	0.00274181	20			4.70026	0.999565	0.00401367	27		0.999578	0.00385358	23		0.997694	0.00403562	37
4.75013	1.00207	0.00682942	48		0.997767	0.00862366	23		0.999452	0.00276035	20			4.75014	0.996395	0.00478692	27		0.998263	0.0068198	23		0.9997	0.002578	37
4.80012	0.999579	0.00428498	48		0.999955	0.00479445	23		0.998673	0.00365062	20			4.80025	0.999203	0.00377883	27		1.00095	0.00459447	23		0.998588	0.00272063	37
4.85011	0.99756	0.00777476	48		0.997984	0.00811512	23		0.99924	0.00297298	20			4.85021	0.998334	0.00314946	27		1.00144	0.0035935	23		0.999509	0.00403705	37
4.9001	0.998179	0.00601312	48		1.00122	0.00782824	23		1.00045	0.00283298	20			4.90004	1.00085	0.00719131	27		0.999465	0.00521906	23		0.997267	0.00442045	37
4.95008	1.00153	0.00680521	48		0.998493	0.00725225	23		0.997253	0.00256672	20			4.95022	1.00013	0.00361254	27		1.00023	0.00460939	23		0.998412	0.00348178	37
5.00003	0.999406	0.00471802	48		0.999499	0.00587205	23		0.998794	0.00564045	20			5.00023	0.999362	0.0035747	27		0.998299	0.00429327	23		0.997282	0.00327913	37
5.05001	1.00149	0.00505632	48		0.999247	0.00458935	23		0.998506	0.00337325	20			5.05011	1.00003	0.00367665	27		1.00081	0.00560284	23		0.999794	0.0038698	37
5.10023	0.999088	0.00465769	48		1.00158	0.00526	23		0.998211	0.00344124	20			5.10013	0.997423	0.00472578	27		0.999199	0.00424041	23		0.998487	0.00357199	37
5.15003	0.99888	0.00515989	48		0.998858	0.00504588	23		0.998192	0.00454083	20			5.15001	0.99786	0.00456818	27		0.99973	0.00482454	23		1.00017	0.00398748	37
5.20002	1.00073	0.010991	48		0.997868	0.00931456	23		1.00033	0.00315254	20			5.20024	0.997587	0.00373639	27		0.999189	0.00508188	23		0.998913	0.00367642	37
5.25001	1.0003	0.005786	48		1.00152	0.00486932	23		0.998778	0.00341788	20			5.25017	0.998043	0.00334974	27		0.999851	0.00423175	23		0.997921	0.00424936	37
5.30013	1.00121	0.0087952	48		0.996898	0.00599499	23		0.998028	0.0029685	20			5.30016	0.998987	0.00452947	27		0.998239	0.00622498	23		0.998561	0.00533601	37
5.35012	1.00078	0.00593215	48		0.99935	0.00682131	23		0.998357	0.00453914	20			5.35026	0.998105	0.00257545	27		0.997656	0.00517904	23		0.998197	0.004249	37
5.40011	1.00108	0.00527503	48		0.995043	0.00685866	23		0.998882	0.00330611	20			5.40001	0.999996	0.00409295	27		0.998938	0.00463209	23		0.999898	0.005167	37
5.4501	1.00153	0.00575159	48		0.997987	0.00555207	23		0.997352	0.00416822	20			5.45015	1.00067	0.00501766	27		0.99982	0.0052366	23		0.999897	0.0044346	37
5.50025	0.999391	0.00550611	48		0.999246	0.00605266	23		0.998689	0.00444789	20			5.50023	0.999227	0.00411948	27		1.00105	0.00931621	23		0.997793	0.00532623	37
5.55016	0.999026	0.0048998	48		0.996572	0.00671611	23		1.00017	0.00567135	20			5.55004	0.998973	0.005831	27		0.999316	0.00948198	23		0.998318	0.00445661	37
5.60021	1.00073	0.00470035	48		1.00026	0.00666129	23		0.997691	0.00450974	20			5.60012	0.998153	0.00758127	27		1.00303	0.01037	23		1.0005	0.00541317	37
5.65013	0.998354	0.00797258	48		1.00031	0.00526558	23		0.998615	0.00359172	20			5.65026	1.00048	0.00680305	27		1.00331	0.0124973	23		0.999181	0.00586728	37
5.70012	1.00059	0.00598426	48		1.0011	0.00941492	23		0.996274	0.00475444	20			5.7001	1.00115	0.00795236	27		1.00539	0.0129437	23		0.998534	0.00671366	37
5.75011	1.00017	0.00696509	48		1.00054	0.00604956	23		0.999811	0.00370623	20			5.75013	1.00289	0.00708669	27		1.00464	0.0149853	23		0.998466	0.00549433	37
5.8001	1.00027	0.00635563	48		0.999194	0.00734669	23		1.00191	0.00702233	20			5.80011	1.00372	0.00749666	27		1.00276	0.0167505	23		0.99927	0.00399958	37
5.85026	1.00019	0.0051064	48		0.998823	0.00673661	23		0.998152	0.00370038	20			5.85011	1.00436	0.00781764	27		1.00549	0.0150205	23		0.997261	0.00584627	37
5.90024	0.998481	0.0126088	48		0.998605	0.0082863	23		0.996102	0.00580631	20			5.90019	1.00521	0.00969055	27		1.00361	0.0169034	23		1.00246	0.0079699	37
5.95016	0.999688	0.00630252	48		0.999228	0.00712119	23		1.00064	0.00513594	20			5.95022	1.00701	0.00833499	27		1.00036	0.0180403	23		1.00103	0.00788715	37
6.00009	0.998859	0.00794925	48		0.996599	0.0081207	23		1.00082	0.00236128	20			6.00024	1.00707	0.00696731	27		1.00228	0.0162194	23		1.00056	0.00665105	37
6.05007	0.999978	0.00632905	48		0.996051	0.00753131	23		0.997757	0.00409596	20			6.05019	1.00762	0.00645551	27		0.998181	0.017214	23		1.00115	0.00846226	37
6.10006	1.00061	0.00684027	48		0.997912	0.00713199	23		0.997229	0.00380832	20			6.10021	1.00662	0.00617226	27		0.997999	0.016048	23		1.00359	0.00863535	37
6.15004	0.997552	0.0078472	48		0.996624	0.0116628	23		0.999405	0.00527051	20			6.1501	1.01274	0.00930245	27		0.996425	0.0189289	23		1.00518	0.0101091	37
6.20002	0.998238	0.00739133	48		0.998998	0.00891541	23		0.998906	0.00473254	20			6.20012	1.0078	0.00692584	27		0.994341	0.0181704	23		1.00363	0.0102356	37
6.25001	0.997589	0.00707898	48		0.999402	0.00935333	23		0.998696	0.00548519	20			6.25019	1.00968	0.00870687	27		0.991667	0.0164052	23		1.00628	0.00974878	37
6.30022	0.998545	0.00783511	48		0.998801	0.00917114	23		0.99898	0.00459534	20			6.30001	1.00856	0.00848667	27		0.990837	0.0194288	23		1.0038	0.0109349	37
6.35014	0.999129	0.0071962	48		0.998953	0.00835485	23		0.999211	0.0052875	20			6.35023	1.00856	0.0103151	27		0.988386	0.0217133	23		1.00571	0.0100736	37
6.40025	0.99704	0.00971909	48		1.00053	0.00966905	23		0.99894	0.00739518	20			6.40007	1.00835	0.0119571	27		0.987264	0.0217322	23		1.00558	0.0130727	37
6.45024	0.994525	0.00914973	48		1.00124	0.0108581	23		1.00041	0.00585912	20			6.45012	1.00816	0.0117071	27		0.985851	0.0229163	23		1.00476	0.0100366	37
6.50023	0.997142	0.00776429	48		0.999502	0.00927249	23		1.00058	0.00685035	20			6.50008	1.00694	0.0132057	27		0.985593	0.0259216	23		1.00551	0.0106401	37
6.55022	0.997098	0.00970268	48		0.998601	0.0107631	23		0.998784	0.0065256	20			6.55018	1.00382	0.0117738	27		0.984379	0.0274064	23		1.00474	0.00972325	37
6.60021	0.994402	0.00998107	48		0.997391	0.0147353	23		0.996506	0.00679094	20			6.60015	1.00565	0.0155949	27		0.98234	0.0299908	23		1.00404	0.00846513	37
6.65005	0.992846	0.0123872	48		0.997828	0.0138338	23		0.998783	0.00835134	20			6.65012	1.0007	0.0127041	27		0.978557	0.0301913	23		1.00163	0.00914071	37
6.70018	0.995582	0.00945859	48		1.0008	0.0122539	23		0.997104	0.00734657	20			6.70022	0.999054	0.0155567	27		0.978403	0.0333652	23		1.00164	0.00813604	37
6.75017	0.99229	0.0130675	48		0.998445	0.0129727	23		0.996563	0.00666056	20			6.75003	0.9983	0.0177008	27		0.974316	0.035394	23		1.00289	0.00821423	37
6.8001	0.992507	0.0143438	48		0.998591	0.0149795	23		0.996062	0.0090625	20			6.80022	0.994238	0.01746	27		0.974875	0.0369673	23		1.00101	0.0087239	37
6.85008	0.9958	0.0106687	48		0.996102	0.0166154	23		0.998796	0.010385	20			6.85022	0.988432	0.0174017	27		0.972266	0.0398055	23		1.00032	0.00925357	37
6.90007	0.993246	0.0133969	48		0.999072	0.016158	23		0.995617	0.00846892	20			6.90024	0.988671	0.0211934	27		0.972129	0.0417486	23		0.998209	0.010975	37
6.95006	0.993922	0.0126209	48		0.996933	0.0174257	23		0.993907	0.00884823	20			6.95014	0.980648	0.0201129	27		0.967192	0.0423185	23		0.996023	0.0108318	37
7.00009	0.990352	0.0133918	48		0.997645	0.0171942	23		0.994279	0.00940755	20			7.00011	0.978103	0.022639	27		0.966091	0.04531	23		0.995587	0.0120759	37
7.05014	0.991255	0.0123724	48		0.996913	0.0181126	23		0.991403	0.00827394	20			7.05002	0.974071	0.0246436	27		0.964614	0.0464673	23		0.993647	0.0146978	37
7.10013	0.989147	0.0250261	48		0.99536	0.0203457	23		0.995102	0.0125342	20			7.10014	0.974115	0.0289614	27		0.959825	0.048383	23		0.992847	0.015994	37
7.15012	0.990801	0.0129255	48		0.99682	0.0205112	23		0.994038	0.0123149	20			7.1502	0.964063	0.0291725	27		0.959225	0.0486652	23		0.986618	0.0170166	37
7.20011	0.988586	0.0148036	48		0.993555	0.0210391	23		0.991888	0.0120641	20			7.20005	0.959086	0.0309382	27		0.958711	0.0507323	23		0.984996	0.0190893	37
7.25008	0.988949	0.0149015	48		0.996808	0.0215162	23		0.989859	0.0117406	20			7.25012	0.955894	0.0330289	27		0.954214	0.0522733	23		0.984051	0.021223	37
7.30007	0.988571	0.0154009	48		0.9962	0.0181586	23		0.989662	0.0117587	20			7.30011	0.951161	0.0355911	27		0.953945	0.051454	23		0.980753	0.0244613	37
7.35001	0.991033	0.0154028	48		0.993734	0.0220623	23		0.990484	0.0141469	20			7.35001	0.945429	0.0375631	27		0.952413	0.0546631	23		0.98245	0.0258547	37
7.40012	0.986851	0.0146184	48		0.993362	0.0247952	23		0.99016	0.0158552	20			7.40001	0.941529	0.0393134	27		0.950196	0.0573932	23		0.977496	0.0283847	37
7.45011	0.986169	0.0159817	48		0.996711	0.0221761	23		0.986766	0.0144366	20			7.45015	0.93736	0.0420529	27		0.947626	0.0567257	23		0.974012	0.0318535	37
7.5001	0.986385	0.0176789	48		0.997218	0.0216129	23		0.985353	0.0155589	20			7.50002	0.933241	0.0441864	27		0.94489	0.0570399	23		0.97141	0.0328485	37
7.55001	0.986192	0.0145103	48		0.996116	0.024093	23		0.986548	0.0166032	20			7.55011	0.92814	0.0454076	27		0.942763	0.0592988	23		0.968029	0.0354414	37
7.6	0.987948	0.0176355	48		0.994702	0.0217583	23		0.985152	0.0183904	20			7.60015	0.923638	0.0467107	27		0.939315	0.0586793	23		0.966827	0.0378037	37
7.65008	0.985762	0.0176195	48		0.993289	0.0220041	23		0.983057	0.0202245	20			7.6502	0.91881	0.049399	27		0.938651	0.0624536	23		0.965369	0.0409608	37
7.70019	0.984688	0.0172378	48		0.993422	0.0203522	23		0.983102	0.0223115	20			7.70011	0.912674	0.0512887	27		0.934972	0.0614041	23		0.96168	0.0416455	37
7.75014	0.988548	0.0164223	48		0.994506	0.022667	23		0.98178	0.0240233	20			7.7502	0.911852	0.052898	27		0.931239	0.0626187	23		0.960155	0.0443463	37
7.80013	0.985904	0.0171991	48		0.994538	0.0214174	23		0.978305	0.0269772	20			7.80019	0.906612	0.0540266	27		0.929965	0.0646706	23		0.957787	0.0466232	37
7.85025	0.984307	0.0173809	48		0.99396	0.0217022	23		0.978615	0.0283112	20			7.85007	0.901314	0.0550122	27		0.927263	0.0652024	23		0.955075	0.0477513	37
7.90024	0.983725	0.0188699	48		0.991047	0.024966	23		0.976511	0.0301979	20			7.90018	0.898016	0.0572919	27		0.927389	0.0680293	23		0.953021	0.0502378	37
7.95023	0.984022	0.0188119	48		0.99267	0.0239584	23		0.976778	0.0322964	20			7.95003	0.895347	0.0581774	27		0.924027	0.0698952	23		0.949586	0.0522816	37
8.00004	0.984178	0.0203026	48		0.991734	0.024112	23		0.975445	0.0355406	20			8.00002	0.893671	0.0592788	27		0.921606	0.0703242	23		0.947871	0.0524714	37
8.05003	0.981289	0.0203748	48		0.991204	0.0222507	23		0.97303	0.0383607	20			8.05009	0.887949	0.0618084	27		0.917267	0.0709519	23		0.946986	0.0541294	37
8.10015	0.983325	0.0187221	48		0.990513	0.0212368	23		0.972443	0.0416331	20			8.10026	0.885127	0.06183	27		0.918049	0.0751726	23		0.942959	0.0563167	37
8.15014	0.981276	0.0192871	48		0.988755	0.0224479	23		0.970456	0.0439625	20			8.15013	0.883479	0.0629855	27		0.914143	0.075958	23		0.940269	0.0576035	37
8.20012	0.981647	0.0197758	48		0.989306	0.0257743	23		0.968619	0.0470875	20			8.20015	0.881337	0.0649582	27		0.911777	0.0755177	23		0.938689	0.0587246	37
8.25011	0.98135	0.0212641	48		0.986733	0.0248477	23		0.968255	0.0502169	20			8.25017	0.877678	0.066318	27		0.908456	0.0782706	23		0.93816	0.0602246	37
8.3001	0.980473	0.0199222	48		0.987751	0.0261558	23		0.965439	0.0535071	20			8.30026	0.874645	0.0667527	27		0.90833	0.0812009	23		0.936433	0.0611227	37
8.35014	0.980996	0.0207836	48		0.99128	0.0256193	23		0.967497	0.0567196	20			8.35018	0.872153	0.0679186	27		0.905427	0.0828334	23		0.934777	0.062396	37
8.40013	0.979306	0.020949	48		0.98849	0.0276306	23		0.965423	0.0594679	20			8.40015	0.868896	0.0699605	27		0.903109	0.0838925	23		0.931952	0.0633868	37
8.45021	0.981746	0.0200604	48		0.990443	0.0251867	23		0.963797	0.0621473	20			8.45021	0.868321	0.0698221	27		0.902977	0.0843301	23		0.930884	0.0649094	37
8.5002	0.980456	0.0215976	48		0.99075	0.025413	23		0.961514	0.0639738	20			8.50011	0.865339	0.0712935	27		0.898293	0.0873097	23		0.929615	0.0645846	37
8.55019	0.981308	0.0205211	48		0.990899	0.0234335	23		0.958113	0.0677951	20			8.55019	0.864225	0.0722317	27		0.90062	0.0885993	23		0.927709	0.0664313	37
8.60004	0.979026	0.0200451	48		0.98681	0.0268707	23		0.958495	0.0701988	20			8.6002	0.863353	0.0725314	27		0.897595	0.0912412	23		0.925762	0.0658174	37
8.65002	0.97851	0.0226888	48		0.988525	0.026958	23		0.958659	0.0726263	20			8.65004	0.860494	0.0730456	27		0.89367	0.0944271	23		0.924004	0.0675536	37
8.70004	0.981241	0.0211578	48		0.987529	0.0246574	23		0.95712	0.0758866	20			8.70018	0.85866	0.0741466	27		0.892348	0.0948086	23		0.92354	0.0673326	37
8.75003	0.978926	0.0215885	48		0.986686	0.0249561	23		0.95385	0.0786482	20			8.75018	0.858441	0.0743367	27		0.889945	0.0971383	23		0.921956	0.0685714	37
8.80012	0.976982	0.0232925	48		0.988303	0.0246645	23		0.952932	0.0804633	20			8.80008	0.85546	0.0754893	27		0.888313	0.0999846	23		0.919997	0.0687171	37
8.85004	0.981	0.0205012	48		0.98687	0.0247076	23		0.952311	0.0831724	20			8.85019	0.854715	0.0753129	27		0.886126	0.10127	23		0.920067	0.0697305	37
8.90002	0.977271	0.0214883	48		0.989578	0.025504	23		0.952903	0.0859588	20			8.90017	0.851113	0.0763513	27		0.885159	0.10436	23		0.917145	0.0699878	37
8.95001	0.97894	0.0240859	48		0.986636	0.0250893	23		0.951197	0.087988	20			8.95005	0.851906	0.0761309	27		0.88615	0.10722	23		0.91682	0.0717829	37
9.00012	0.978735	0.0210373	48		0.986388	0.0277883	23		0.949834	0.0895939	20			9.00011	0.851259	0.077751	27		0.883586	0.109914	23		0.916045	0.0716698	37
9.05012	0.979478	0.0212459	48		0.986412	0.0262133	23		0.94828	0.0919638	20			9.05019	0.848738	0.0778534	27		0.880352	0.109632	23		0.916672	0.0721324	37
9.10011	0.980961	0.0220897	48		0.98663	0.0277729	23		0.946044	0.0947092	20			9.10017	0.848154	0.0795232	27		0.878542	0.113981	23		0.914219	0.0723252	37
9.15011	0.978339	0.0232985	48		0.984948	0.0262957	23		0.943347	0.0969803	20			9.15007	0.847623	0.0783938	27		0.877267	0.113187	23		0.914155	0.0734362	37
9.2001	0.977074	0.0237412	48		0.988109	0.0237112	23		0.944301	0.0990669	20			9.20021	0.847083	0.0787777	27		0.877806	0.116741	23		0.911899	0.0739718	37
9.25009	0.976522	0.0234649	48		0.986174	0.0261183	23		0.941561	0.101494	20			9.25022	0.846871	0.0808111	27		0.87467	0.11884	23		0.912118	0.0745394	37
9.30007	0.974674	0.0243357	48		0.986649	0.0247592	23		0.943637	0.102933	20			9.30007	0.847713	0.0793991	27		0.873548	0.121072	23		0.912241	0.0728209	37
9.35003	0.977826	0.0242069	48		0.984952	0.0262091	23		0.938764	0.105036	20			9.35003	0.843618	0.0812848	27		0.874898	0.122372	23		0.909906	0.0756146	37
9.40002	0.97707	0.0235225	48		0.985787	0.0243725	23		0.937862	0.107403	20			9.4001	0.842033	0.0816204	27		0.871785	0.124167	23		0.909995	0.0760007	37
9.45001	0.974195	0.0242293	48		0.986935	0.0259282	23		0.937994	0.109252	20			9.4501	0.841264	0.0824379	27		0.870762	0.125749	23		0.908139	0.0755897	37
9.50025	0.974961	0.0245284	48		0.985093	0.0262034	23		0.936748	0.110482	20			9.50019	0.840557	0.0826415	27		0.870303	0.128641	23		0.908749	0.0763514	37
9.55007	0.976137	0.0258797	48		0.98426	0.0248247	23		0.935877	0.111466	20			9.55021	0.840397	0.0829912	27		0.868026	0.129631	23		0.908281	0.0766095	37
9.60006	0.975733	0.024831	48		0.985163	0.0274406	23		0.932677	0.11276	20			9.60021	0.840041	0.0835572	27		0.866263	0.131745	23		0.908558	0.0774896	37
9.65019	0.974351	0.0237554	48		0.98209	0.0303714	23		0.932954	0.114671	20			9.65016	0.838078	0.0842693	27		0.866203	0.132756	23		0.905604	0.0767803	37
9.70009	0.975159	0.0257924	48		0.983528	0.0289357	23		0.930467	0.115768	20			9.70001	0.838745	0.0853314	27		0.867072	0.13185	23		0.906057	0.0772	37
9.75008	0.97585	0.0251614	48		0.985323	0.025388	23		0.927104	0.116657	20			9.7501	0.837764	0.0855161	27		0.865448	0.133855	23		0.906218	0.0766792	37
9.8002	0.97557	0.0250404	48		0.982671	0.0279087	23		0.927561	0.11777	20			9.80011	0.836711	0.0861627	27		0.86344	0.136564	23		0.904983	0.0773102	37
9.85019	0.975679	0.0250767	48		0.984285	0.0269102	23		0.92891	0.11898	20			9.85023	0.837273	0.0861381	27		0.864058	0.135395	23		0.906002	0.078502	37
9.90018	0.975194	0.0255182	48		0.985722	0.0294165	23		0.926205	0.120756	20			9.90014	0.835954	0.0874963	27		0.863958	0.137567	23		0.907057	0.0787681	37
9.95004	0.973782	0.0253629	48		0.984606	0.0267038	23		0.924999	0.120738	20			9.95005	0.834991	0.0875161	27		0.866933	0.138068	23		0.903915	0.0794116	37
10	0.973833	0.0258666	48		0.981669	0.0272439	23		0.920603	0.121751	20			10.0002	0.834985	0.0866914	27		0.862686	0.139299	23		0.904305	0.0783658	37
10.0502	0.976047	0.025922	48		0.983971	0.0279663	23		0.922014	0.121958	20			10.05	0.83422	0.0880942	27		0.864713	0.141151	23		0.903904	0.0807518	37
10.1002	0.975598	0.0274052	48		0.985476	0.0265675	23		0.920689	0.12296	20			10.1001	0.83473	0.0879397	27		0.864256	0.13982	23		0.904843	0.080661	37
10.1502	0.973949	0.0273909	48		0.984008	0.0266609	23		0.919408	0.123468	20			10.1502	0.835832	0.0879841	27		0.861525	0.138723	23		0.903064	0.0797122	37
10.2002	0.972617	0.027376	48		0.982248	0.02763	23		0.919555	0.124386	20			10.2002	0.834949	0.0880268	27		0.864341	0.14319	23		0.90265	0.0802443	37
10.25	0.975603	0.0290566	48		0.985289	0.0248268	23		0.915998	0.124617	20			10.25	0.834387	0.0884557	27		0.863566	0.142359	23		0.902643	0.0807395	37
10.3001	0.973031	0.0295057	48		0.981759	0.0285907	23		0.916249	0.125688	20			10.3001	0.833137	0.0878934	27		0.86404	0.143084	23		0.903141	0.0798868	37
10.3501	0.973856	0.0266364	48		0.981934	0.0271219	23		0.913384	0.126305	20			10.35	0.833921	0.0890532	27		0.863035	0.142332	23		0.902667	0.0803516	37
10.4	0.973908	0.0290095	48		0.97936	0.0294892	23		0.914551	0.126822	20			10.4	0.832621	0.0892015	27		0.862231	0.142377	23		0.901658	0.0797568	37
10.4502	0.973598	0.0275083	48		0.980599	0.0291521	23		0.913868	0.128749	20			10.4501	0.835856	0.0899248	27		0.862705	0.142903	23		0.903478	0.0809012	37
10.5002	0.971397	0.0287602	48		0.985156	0.0270549	23		0.910708	0.128587	20			10.5002	0.832261	0.0891658	27		0.864061	0.14531	23		0.902729	0.0799889	37
10.5502	0.973289	0.0272399	48		0.981531	0.0278644	23		0.909722	0.129814	20			10.5502	0.834194	0.0891269	27		0.862748	0.142663	23		0.902072	0.0814603	37
10.6002	0.973872	0.0279975	48		0.979839	0.030715	23		0.908364	0.130334	20			10.6001	0.833713	0.0891369	27		0.863281	0.143434	23		0.901494	0.080582	37
10.6502	0.971699	0.0302578	48		0.984571	0.0266739	23		0.908301	0.130961	20			10.6502	0.834252	0.0892679	27		0.863236	0.143384	23		0.902372	0.0805152	37
10.7002	0.973436	0.0288352	48		0.980283	0.0287935	23		0.906247	0.132156	20			10.7001	0.832959	0.0890509	27		0.864556	0.14486	23		0.902311	0.0817085	37
10.7502	0.969228	0.0308491	48		0.981465	0.03071	23		0.906473	0.132408	20			10.7501	0.834481	0.0900604	27		0.865576	0.144194	23		0.902401	0.082585	37
10.8002	0.972616	0.0301857	48		0.980505	0.029715	23		0.902797	0.13331	20			10.8002	0.834787	0.0892062	27		0.862792	0.144629	23		0.902864	0.0836674	37
10.8502	0.971413	0.0295637	48		0.980379	0.0311748	23		0.903766	0.134966	20			10.8501	0.833406	0.0895093	27		0.862434	0.145599	23		0.902016	0.0829288	37
10.9002	0.970431	0.0297334	48		0.981511	0.0286073	23		0.901855	0.135091	20			10.9001	0.8331	0.0896202	27		0.862208	0.143386	23		0.905418	0.0846564	37
10.9502	0.971327	0.0298924	48		0.98047	0.029689	23		0.900412	0.135926	20			10.9503	0.831999	0.0891292	27		0.863848	0.145013	23		0.902224	0.0829706	37
11.0002	0.973833	0.0322037	48		0.981601	0.0290106	23		0.899126	0.136234	20			11.0003	0.833482	0.0895381	27		0.862333	0.142657	23		0.902462	0.0842875	37
11.05	0.971254	0.0311849	48		0.981038	0.0300009	23		0.899648	0.138121	20			11.0501	0.832052	0.0898164	27		0.864718	0.146055	23		0.902655	0.0843698	37
11.1003	0.970974	0.0307689	48		0.982791	0.0280124	23		0.898203	0.138542	20			11.1001	0.832706	0.0899501	27		0.862866	0.142095	23		0.902077	0.0841563	37
11.1503	0.971897	0.0298771	48		0.980134	0.0300584	23		0.898276	0.140047	20			11.1501	0.833675	0.0891507	27		0.863472	0.143796	23		0.901925	0.0843695	37
11.2002	0.97201	0.0309367	48		0.980204	0.0304834	23		0.896133	0.139667	20			11.2	0.833703	0.089981	27		0.864204	0.144939	23		0.902371	0.0847446	37
11.2502	0.970782	0.0333154	48		0.97908	0.0309924	23		0.895661	0.141637	20			11.2502	0.833291	0.0898274	27		0.864745	0.14603	23		0.904723	0.085307	37
11.3001	0.971072	0.0307645	48		0.981973	0.0295522	23		0.893617	0.142073	20			11.3001	0.831848	0.090229	27		0.863321	0.143697	23		0.903046	0.08564	37
11.3501	0.969256	0.031408	48		0.980672	0.0310165	23		0.893636	0.143079	20			11.3501	0.831196	0.0901288	27		0.863777	0.143907	23		0.90267	0.0850601	37
11.4001	0.969901	0.0317936	48		0.98302	0.0303008	23		0.894701	0.143732	20			11.4001	0.831601	0.0910382	27		0.863651	0.143906	23		0.900696	0.0843528	37
11.45	0.970073	0.0337391	48		0.979803	0.0326831	23		0.894099	0.145587	20			11.4501	0.832753	0.0908087	27		0.862862	0.143455	23		0.900138	0.0857933	37
11.5002	0.969104	0.0324008	48		0.982002	0.0298813	23		0.892339	0.14544	20			11.5001	0.830667	0.0905345	27		0.863375	0.144351	23		0.900449	0.0846323	37
11.5502	0.970105	0.0321214	48		0.981251	0.0332816	23		0.890825	0.146504	20			11.5502	0.832097	0.090684	27		0.862159	0.142836	23		0.900642	0.0849168	37
11.6001	0.972631	0.033871	48		0.980806	0.0310493	23		0.890645	0.146848	20			11.6	0.831459	0.0903505	27		0.862139	0.142125	23		0.90021	0.0847213	37
11.6501	0.969137	0.0333182	48		0.980055	0.0301309	23		0.891326	0.148045	20			11.6501	0.831929	0.091289	27		0.864097	0.141983	23		0.900642	0.0854139	37
11.7001	0.96888	0.0329432	48		0.9795	0.0306389	23		0.888205	0.149127	20			11.7002	0.829688	0.0912498	27		0.863386	0.14246	23		0.902124	0.0859891	37
11.7501	0.969753	0.0329904	48		0.979761	0.0289484	23		0.887577	0.149553	20			11.75	0.830311	0.091669	27		0.862533	0.143365	23		0.9001	0.085147	37
11.8001	0.967152	0.0344837	48		0.97732	0.0288097	23		0.886993	0.150097	20			11.8	0.831024	0.0920568	27		0.863065	0.142251	23		0.899632	0.0854817	37
11.8502	0.968668	0.0346513	48		0.979414	0.0315851	23		0.887467	0.152009	20			11.8501	0.831004	0.0924358	27		0.863441	0.142725	23		0.901619	0.0841947	37
11.9002	0.969124	0.033637	48		0.97882	0.0302263	23		0.886438	0.1519	20			11.9002	0.831045	0.0931974	27		0.862676	0.143063	23		0.899974	0.0852493	37
11.9503	0.966827	0.0338713	48		0.98074	0.0306726	23		0.884759	0.151712	20			11.9501	0.83069	0.0928683	27		0.862045	0.143372	23		0.899841	0.0851766	37
12.0002	0.970337	0.0345852	48		0.980942	0.0311228	23		0.884139	0.153167	20			12.0001	0.830102	0.0928798	27		0.863027	0.142589	23		0.898065	0.0846891	37
12.0502	0.967934	0.0345113	48		0.981042	0.0312264	23		0.885839	0.152817	20			12.05	0.828731	0.0931589	27		0.860822	0.140795	23		0.900247	0.0850959	37
12.1002	0.966537	0.0356321	48		0.981948	0.0304316	23		0.883161	0.152812	20			12.1001	0.830512	0.0938528	27		0.860905	0.141412	23		0.901611	0.0856418	37
12.1502	0.968472	0.0346308	48		0.982361	0.0309202	23		0.883228	0.15465	20			12.1502	0.829041	0.0939569	27		0.862782	0.141428	23		0.900411	0.0853006	37
12.2003	0.966144	0.0348427	48		0.980451	0.0316348	23		0.881596	0.154043	20			12.2003	0.827818	0.0943286	27		0.862903	0.141783	23		0.898721	0.0849053	37
12.2501	0.968605	0.0357107	48		0.979565	0.0316557	23		0.883113	0.154461	20			12.25	0.831058	0.0941973	27		0.861239	0.140127	23		0.898796	0.0849539	37
12.3	0.966633	0.0366947	48		0.976806	0.0333698	23		0.882658	0.153942	20			12.3002	0.828578	0.095223	27		0.861908	0.139317	23		0.898555	0.0847895	37
12.35	0.96955	0.0355789	48		0.9794	0.0312493	23		0.882078	0.154895	20			12.3502	0.830006	0.0948601	27		0.863774	0.140059	23		0.897977	0.0849651	37
12.4	0.968627	0.0367511	48		0.97912	0.0324786	23		0.879084	0.155958	20			12.4001	0.828381	0.0965553	27		0.864161	0.140406	23		0.900034	0.0837816	37
12.45	0.969249	0.0358959	48		0.979931	0.0324284	23		0.880069	0.154392	20			12.4501	0.830591	0.0960988	27		0.863785	0.139106	23		0.8981	0.0839255	37
12.5003	0.967684	0.0374223	48		0.976019	0.0338858	23		0.881335	0.154806	20			12.5002	0.829458	0.0969229	27		0.861738	0.138908	23		0.896335	0.0836626	37
12.5501	0.966155	0.0370572	48		0.976636	0.0313042	23		0.878969	0.156496	20			12.55	0.830084	0.0976476	27		0.861071	0.14049	23		0.897922	0.0835527	37
12.6001	0.968984	0.0362686	48		0.978886	0.0324085	23		0.878112	0.156338	20			12.6001	0.829066	0.0981272	27		0.863168	0.139011	23		0.896897	0.0832854	37
12.6501	0.966776	0.0375245	48		0.979226	0.0321547	23		0.877893	0.155527	20			12.6501	0.831656	0.0983382	27		0.861856	0.139033	23		0.897525	0.0833298	37
12.7	0.969721	0.0370947	48		0.977609	0.0337962	23		0.877865	0.155147	20			12.7	0.829161	0.0986608	27		0.864724	0.137214	23		0.897871	0.0833108	37
12.75	0.967298	0.0382662	48		0.976261	0.0329834	23		0.877128	0.155597	20			12.7501	0.829466	0.0984824	27		0.864827	0.137888	23		0.897152	0.0844473	37
12.8	0.96762	0.0379139	48		0.976869	0.0337322	23		0.876365	0.155531	20			12.8002	0.827947	0.0991924	27		0.861943	0.138698	23		0.89592	0.0831225	37
12.8501	0.966303	0.038999	48		0.978722	0.0347729	23		0.876579	0.155565	20			12.8501	0.827893	0.100373	27		0.865395	0.14012	23		0.895367	0.083205	37
12.9001	0.966264	0.0403547	48		0.977985	0.0341092	23		0.87925	0.155681	20			12.9001	0.828629	0.0998025	27		0.863475	0.136673	23		0.895543	0.0830243	37
12.9501	0.966891	0.037917	48		0.979804	0.0333685	23		0.874571	0.155343	20			12.9501	0.82986	0.100483	27		0.864273	0.136063	23		0.896301	0.0824424	37
13.0001	0.964567	0.0391442	48		0.9775	0.0310788	23		0.874627	0.157069	20			13.0002	0.829146	0.101426	27		0.865284	0.137102	23		0.894554	0.0815867	37
13.0502	0.965918	0.0397888	48		0.980085	0.0334061	23		0.875601	0.15611	20			13.0502	0.829939	0.101006	27		0.865752	0.137218	23		0.896563	0.0840486	37
13.1002	0.965719	0.0393529	48		0.978562	0.0337398	23		0.875364	0.155768	20			13.1001	0.828177	0.102422	27		0.864538	0.134438	23		0.894585	0.0826471	37
13.1502	0.966334	0.038847	48		0.977231	0.0322974	23		0.87491	0.155731	20			13.1501	0.829836	0.10254	27		0.865168	0.136614	23		0.894281	0.0816768	37
13.2001	0.964937	0.0387759	48		0.978478	0.034705	23		0.872566	0.156342	20			13.2	0.830755	0.102775	27		0.864234	0.135806	23		0.895704	0.0818778	37
13.2501	0.966272	0.0409691	48		0.975373	0.0343465	23		0.871356	0.155393	20			13.2501	0.827332	0.103206	27		0.863819	0.133847	23		0.894092	0.0824512	37
13.3001	0.964231	0.0403084	48		0.980785	0.0320491	23		0.874047	0.155818	20			13.3001	0.830369	0.104376	27		0.864963	0.135603	23		0.894081	0.0815081	37
13.3501	0.964387	0.0406415	48		0.975985	0.0324059	23		0.872266	0.156587	20			13.3502	0.829012	0.104497	27		0.864561	0.13529	23		0.895601	0.081261	37
13.4001	0.963823	0.0407832	48		0.978778	0.0353175	23		0.872781	0.157749	20			13.4002	0.829351	0.10446	27		0.866468	0.134828	23		0.894035	0.0821621	37
13.4501	0.965954	0.0412421	48		0.976373	0.0347954	23		0.871729	0.157325	20			13.4502	0.830622	0.105542	27		0.866455	0.134076	23		0.893736	0.0821604	37
13.5001	0.96682	0.0410529	48		0.980408	0.0337002	23		0.871975	0.156594	20			13.5002	0.828674	0.104542	27		0.866226	0.133894	23		0.89275	0.0812219	37
13.5502	0.963911	0.0417259	48		0.976666	0.0336726	23		0.871184	0.15638	20			13.5502	0.82777	0.105681	27		0.866527	0.132362	23		0.893253	0.0814263	37
13.6001	0.962954	0.0412461	48		0.975283	0.0351288	23		0.869447	0.156662	20			13.6001	0.830056	0.106978	27		0.867239	0.133779	23		0.895443	0.0819458	37
13.6502	0.965056	0.0411528	48		0.974643	0.0336277	23		0.872139	0.156061	20			13.65	0.831317	0.108013	27		0.865876	0.132734	23		0.895118	0.0815175	37
13.7003	0.964667	0.0421967	48		0.974896	0.0334913	23		0.869369	0.157218	20			13.7001	0.830358	0.107705	27		0.867273	0.131807	23		0.894798	0.0815692	37
13.7502	0.964643	0.0421778	48		0.97689	0.0344827	23		0.867966	0.157272	20			13.7501	0.829953	0.107391	27		0.869664	0.13256	23		0.895251	0.081536	37
13.8002	0.964018	0.0431596	48		0.978537	0.0349626	23		0.869837	0.155939	20			13.8001	0.830335	0.108381	27		0.866541	0.132233	23		0.893094	0.0814119	37
13.85	0.963351	0.0424464	48		0.978249	0.0340757	23		0.866962	0.156577	20			13.85	0.830613	0.108684	27		0.866804	0.133554	23		0.892757	0.0798145	37
13.9	0.964381	0.0437869	48		0.975171	0.0372096	23		0.868398	0.156523	20			13.9001	0.830644	0.109541	27		0.866031	0.131881	23		0.893103	0.0811585	37
13.9501	0.964481	0.0441804	48		0.974618	0.0337349	23		0.867386	0.156811	20			13.9502	0.829588	0.109677	27		0.869778	0.132731	23		0.893781	0.0817512	37
14.0001	0.96236	0.0437768	48		0.978265	0.0337275	23		0.867274	0.156858	20			14.0002	0.830575	0.10984	27		0.868307	0.129856	23		0.893536	0.0810862	37
14.0501	0.963282	0.0444006	48		0.974489	0.0351421	23		0.865038	0.157978	20			14.05	0.829377	0.109716	27		0.866153	0.130091	23		0.892774	0.0815277	37
14.1001	0.963427	0.0440173	48		0.978039	0.034108	23		0.865621	0.157709	20			14.1001	0.831205	0.111166	27		0.870128	0.128398	23		0.893288	0.0815808	37
14.1501	0.96327	0.0435055	48		0.976705	0.0349794	23		0.86534	0.156404	20			14.1501	0.830983	0.110604	27		0.86937	0.130623	23		0.894193	0.0814235	37
14.2001	0.962238	0.0459021	48		0.976937	0.0350255	23		0.864951	0.156111	20			14.2001	0.830234	0.111352	27		0.870381	0.131678	23		0.891844	0.0812956	37
14.2502	0.962788	0.0453001	48		0.974276	0.0346614	23		0.864238	0.155801	20			14.2501	0.828868	0.111029	27		0.868458	0.129148	23		0.891451	0.0806004	37
14.3002	0.960713	0.0452858	48		0.975113	0.0360829	23		0.864819	0.15691	20			14.3002	0.829352	0.112034	27		0.867119	0.130341	23		0.891811	0.0824177	37
14.3502	0.962371	0.044812	48		0.975125	0.0369803	23		0.865404	0.157158	20			14.3502	0.829213	0.112735	27		0.868738	0.12912	23		0.893161	0.0821897	37
14.4002	0.963933	0.045627	48		0.97562	0.0360502	23		0.865005	0.156931	20			14.4001	0.830618	0.11273	27		0.866825	0.129959	23		0.892203	0.0806841	37
14.4502	0.963151	0.0455198	48		0.974634	0.0365038	23		0.864295	0.15623	20			14.45	0.830757	0.113515	27		0.866065	0.127578	23		0.891821	0.0813845	37
14.5002	0.963864	0.0458461	48		0.976002	0.036872	23		0.861976	0.157352	20			14.5001	0.830658	0.114022	27		0.867779	0.128514	23		0.892839	0.0818154	37
14.5501	0.96217	0.0463649	48		0.972858	0.0380872	23		0.860665	0.158028	20			14.5501	0.831795	0.113178	27		0.869245	0.129437	23		0.893922	0.0807	37
14.6002	0.96116	0.0472632	48		0.975037	0.0371067	23		0.859846	0.156893	20			14.6002	0.832069	0.113815	27		0.870568	0.131205	23		0.891769	0.0819122	37
14.6501	0.963516	0.0463973	48		0.974482	0.0380404	23		0.862972	0.157325	20			14.6502	0.830114	0.113216	27		0.869575	0.13194	23		0.891839	0.0822679	37
14.7002	0.961915	0.0472536	48		0.972377	0.0395649	23		0.860834	0.157051	20			14.7002	0.832379	0.114371	27		0.868157	0.130362	23		0.892802	0.0822622	37
14.7501	0.959783	0.047777	48		0.975788	0.037363	23		0.860832	0.156984	20			14.7502	0.831052	0.114377	27		0.867732	0.127558	23		0.893428	0.0813028	37
14.8001	0.960505	0.0474834	48		0.972632	0.0379022	23		0.859728	0.158529	20			14.8001	0.831331	0.115905	27		0.87005	0.127987	23		0.891671	0.0810186	37
14.8502	0.964138	0.0472367	48		0.972986	0.0394359	23		0.85996	0.156793	20			14.8502	0.83331	0.115334	27		0.869071	0.126098	23		0.893443	0.0828364	37
14.9002	0.960657	0.047772	48		0.974785	0.0386138	23		0.861768	0.157453	20			14.9003	0.830625	0.115842	27		0.868215	0.126042	23		0.892083	0.0821238	37
14.9501	0.962051	0.0490606	48		0.972137	0.0397338	23		0.8596	0.158195	20			14.9503	0.831572	0.116001	27		0.86805	0.128837	23		0.89295	0.0820243	37

## Sheet: Fig.4J
MCF-7
ctrl	+BKCa - RFP	+BKCa-DEC - RFP
0.287886	0.514647	0.695698
0.203924	0.159722	0.427695
0.202428	0.329512	0.421455
0.372539	0.169846	0.637944
0.379782	0.571871	0.669047
0.252984	0.0638289	0.507587
0.278358	0.261959	0.914506
0.170524	0.074534	0.481025
0.0890737	0.264837	4.26315
0.290114	0.391597	5.32934
0.210034	0.345976	0.39662
0.21466	0.0491649	0.317238
0.251998	0.333204	0.640186
0.337071	0.311679	0.219681
0.098742	0.106473	2.22505
0.146117	0.171424	2.3677
0.245998	0.169803	2.7688
0.24257	0.435367	1.66936
0.0586895	0.588671	0.830334
0.0563753	0.14322	0.193432
0.298408	0.180654
0.0820978	0.547531
0.815611	0.520906
0.234663
0.370035
0.0608891
0.0698679
0.10017
0.372429
0.51079
0.281664
0.113957
0.179155
0.121825
0.0693133
0.0716425
0.0617487
0.0590242
0.0926665
0.316348
0.406425
0.676861
0.127133
0.129146
1.47588
0.583695
0.221133
0.280398

[truncated: 7 more sheets: Fig.4K, Fig.4L, Fig.4M, Fig.4N, Fig.4O, Fig.4P, Fig.4q]
