# Supplementary material for: mitoBKCa is functionally expressed in murine and human breast cancer cells and potentially contributes to metabolic reprogramming
Source: eLife. 2024 May 29;12:RP92511. doi: 10.7554/eLife.92511 (PMC11136494; doi:10.7554/eLife.92511)
Supplement: Figure 5—source data 1. [file elife-92511-fig5-data1.xlsx]

## Sheet: Fig.5B
MDA-MB-453
Voltage (mV)	Open probability (%)
-80	83.9	83.9	89.64		90.37	84.7	74.6
-60	85.7	89.1	89.23	86.37	95.15	83.5	78.3	37
-40	90.1	87.3	83.57	93.66	92.39	87.6	79.8	22
-20	93.4	89.3	94.44	96.11	96.8	89.7	80.6	57
0
20	89.3	93	91.47	96.3	96.36	89.2	82.1	49
40	92.1	95.5	93.34	97.5	96.84	90.9	86.3	45
60	90.6	87.9	95.56	96.72	96.39	93.4	90.2	46
80	98.5	91.7	94.28	96.72	96.04	96.8	94.3

## Sheet: Fig.5D
MDA-MB-453
Voltage (mV)	Current (pA)
-80	-13.45	-16.91	-14.57	-12.78				-16.71	-18.19	-18.06	-18.21
-60	-11.02	-13.33	-11.59	-13.02	-12.2	-13.2	-13.9	-13.61	-12.53	-12.52	-13.24
-40	-8.71	-8.25	-8.097	-8.625	-9.2	-8.3	-8.51	-8.194	-9.432	-9.721	-8.158
-20	-3.95	-4.87	-4	-4.475	-4.9	-3.7	-4.33	-3.21	-4.718	-5.197	-3.731
0
20	3.81	3.91	4.67	5.125	4.9	3.6	4.56	4.301	4.477	4.559	4.892
40	7.5	8.47	9.66	9.03	7.9	7.8	8.99	9.622	7.739	7.25	8.562
60	10.5	13.76	13.55	13.34	12.2	11.9	13.22	13.21	12.9	11.54	11.85
80	16.27	18.41	17.02	18.13				18.3	19.4	17.05	17.72

## Sheet: Fig.5F
MDA-MB-453
control	1 µM Ca2+	100 µM Ca2+	5 µM PAX
92.1	1	92.2	1
95.5	1	96.6	1
93.5829	1	90.39	1
95.6262	1	88.95	1
94.46	1	90.67	1
98.26	1	90.66	1
95.2	5	91.28	4

## Sheet: Fig.5G
Numbers
	EMPTY	≤100 pS	≤150 pS	~210 pS	TOTAL (N)
MDA-MB-453	135	32	12	31	210
MMTV-PyMT WT	104	15	1	7	127
MMTV-PyMT BKKO	66	7	3	0	76
MCF-7	49	8	1	0	58
Percentage
	EMPTY	≤100pS	≤150pS	~210 pS	TOTAL (%)
MDA-MB-453	64.2857	15.2381	5.71429	14.7619	100
MMTV-PyMT WT	81.8898	11.811	0.787402	5.51181	100
MMTV-PyMT BKKO	86.8421	9.21053	3.94737	0	100
MCF-7	84.4828	13.7931	1.72414	0	100
