# Supplementary material for: mitoBKCa is functionally expressed in murine and human breast cancer cells and potentially contributes to metabolic reprogramming
Source: eLife. 2024 May 29;12:RP92511. doi: 10.7554/eLife.92511 (PMC11136494; doi:10.7554/eLife.92511)
Supplement: Figure 6—figure supplement 1—source data 1. [file elife-92511-fig6-figsupp1-data1.xlsx]

## Sheet: Fig.S6B
MMTV-PyMT WT				MMTV-PyMT WT
BKCa				BKCa-DEC
siScrbl	siBK	siDEC		siScrbl	siBK	siDEC
1	0.544645	0.580769		1	0.549229	0.526117
1	0.5386	1.0675		1	0.748379	0.762295
1	0.457344	0.707521		1	0.832958	0.653662
	0.570668				0.670263

## Sheet: Fig.S6C
MDA-MB-453				MDA-MB-453
BKCa				BKCa-DEC
siScrbl	siBK	siDEC		siScrbl	siBK	siDEC
1	0.447113	0.755971		1	0.110841	0.231075
1	0.270114	0.656484		1	0.272014	0.0190298
1	0.474788	0.954919		1	0.287439	0.539863

## Sheet: Fig.S6E
MMTV-PyMT WT				MMTV-PyMT BK-KO
ctrl	+ PAX	+ IBTX		ctrl	+ PAX	+ IBTX
0.149421	0.0901302	0.132982		0.127083	0.109232	0.106397
0.183854	0.11972	0.2074		0.0712136	0.0714208	0.13189
0.204922	0.0812234	0.177964		0.0374297	0.149201	0.165581
0.225536	0.145334	0.160945		0.0601141	0.0938484	0.0822978
0.123775	0.0419788	0.181888		0.156221	0.0908057	0.139717
	0.079503	0.164282		0.206456		0.0817121
					0.1315

## Sheet: Fig.S6F
MDA-MB-453
ctrl	+ PAX	+ IBTX
0.160162	0.0941785	0.102267
0.0958506	0.0528188	0.196481
0.14048	0.0559988	0.0798375
0.0732781	0.0629642	0.147569
0.0714813	0.0388799	0.118717
0.15684	0.0571679

## Sheet: Fig.S6G
MMTV-PyMT WT			MMTV-PyMT BK-KO
ctrl	-O2		ctrl	-O2
1.00384	1.14163		0.918596	0.78285
0.996162	0.981404		1.0814	0.708691
0.958084	0.901198		1.39147	1.06586
1.12575	1.12275		0.851577	1.00464
0.916168	0.922156		0.756957	1.0102
0.785166	1.25831		0.879533	0.890596
1.40153	1.62916		1.12846	0.905347
0.813299	1.22251		0.99201	0.746773
