# Supplementary material for: mitoBKCa is functionally expressed in murine and human breast cancer cells and potentially contributes to metabolic reprogramming
Source: eLife. 2024 May 29;12:RP92511. doi: 10.7554/eLife.92511 (PMC11136494; doi:10.7554/eLife.92511)
Supplement: Figure 6—source data 1. [file elife-92511-fig6-data1.xlsx]

## Sheet: Fig.6C
MMTV-PyMT WT				MMTV-PyMT BK-KO
ctrl	+ PAX	+ IBTX		ctrl	+ PAX	+ IBTX
0.251941	0.12728	0.293979		0.372779	0.137322	0.520554
0.249638	0.0733937	0.471089		0.177545	0.177673	0.373641
0.205884	0.0349457	0.652297		0.229388	0.26012	0.172452
0.181062	0.262521	0.489531		0.170522	0.184119	0.318325
0.817863	0.235149	0.444262		0.241645	0.0943955	0.221804
1.08862	0.352842	0.623111		0.291992	0.204318	0.273992
0.743091	0.417622	0.593449		0.47718	0.387464	0.824525
0.50411	0.918319	0.668996		0.330213	0.290989	0.265659
0.466877	0.540366	0.435944		0.412861	0.496494	0.328869
0.648518	0.438569	0.428731		0.579215	0.209561	0.3486
0.616207	0.483731	0.53544		0.367466	0.352002	0.35632
0.679925	0.26504	0.504183		0.320218	0.487094	0.333668
0.525782	0.360286	0.462792		0.440574	0.37743	0.361346
0.291191	0.343148	0.506465		0.398076	0.200713	0.315887
0.226691	0.346634	0.726113		0.351704	0.230125	0.280526
0.497504	0.121619	0.512303		0.469157	0.298545	0.442663
0.40152	0.198472	0.534625		0.178926	0.423829	0.383822
0.704685	0.198579	0.590446			0.502203	0.410553
0.362535	0.185776	0.552567				0.35608
0.426471	0.174623	0.777445				0.344731
0.77413	0.439885	0.865157				0.318713
0.606146	0.0819667	0.298242				0.368111
0.897566	0	0.292289				0.368082
0.859274	1.66854	1.34633				0.480863
0.815688	0.462387	1.18425				0.309126
0.511839	0.459115	0.71799				0.313362
	0.579231	0.725862				0.197518
	0.47435	0.654255
		0.732311
		0.742455
		0.449615
		0.708134
		0.484314
		0.454313
		0.57419
		0.567461
		0.630048
		0.91573
		0.651973

## Sheet: Fig.6D
MDA-MB-453
ctrl	+ PAX
0.581527	0.164121
0.13286	0.121648
0.301956	0.0875645
0.514031	0.151135
0.515227	0.0671836
0.52372	0.183718
1.6317	0.224249
0.552089	0.230471
1.2846	0.421196
1.05278	0.457776
1.10925	0.14233
1.26789	0.210378
1.98533	0.181715
1.07508
0.758541
1.20592
1.13425
0.472545
1.25368
0.793001
1.23081
1.7475
0.531611
1.66921
0.20777
0.206428
0.158544
0.184072
0.175191

## Sheet: Fig.6E
MCF-7
ctrl	+BKCa - RFP	+BKCa-DEC - RFP
0.302692	0.340672	0.811239
0.293041	0.547458	0.883167
0.282504	0.306265	1.80316
0.27896	0.195049	0.868217
0.199272	0.457009	0.367299
0.230127	0.193592	3.38338
0.326017	0.232275	0.860409
0.880092	0.34146	0.914075
0.13511	0.159448	0.830202
0.788532	0.234239	0.382029
0.541151	0.0837185	1.09849
0.458979	0.452093	3.44967
0.585839	0.181192	0.707953
0.632707	2.05224	0.0850756
0.199593	0.0574417	0.416573
0.202345	0.108353	1.22417
0.154279	0.1258	0.239937
0.137197	0.282696	0.286467
0.715595	0.639303	0.169268
0.357574	0.165333	0.816347
0.20185		3.82162
0.379939		3.45088
0.179718		0.432152
0.486001		0.491143
0.43344		0.425599
1.02654		0.654763
0.219728
0

## Sheet: Fig.6F
MMTV-PyMT WT				MMTV-PyMT BK-KO
siScrbl	siBK	siDEC		siScrbl	siBK	siDEC
0.960905	0.86175	0.377293		0.439306	0.416192	0.464048
0.729542	0.105543	0.279129		0.409222	0.538884	0.578622
0.698561	0.504034	0.170372		0.602373	0.55978	0.565697
0.576829	0.261391	0.265278		0.643919	0.47236	0.461062
1.02973	0.39028	0.346042		0.623251	0.449132	0.266131
1.11696	0.415951	0.0305009		0.570057	0.429628	0.808528
2.02299	0.364261	0.107598		0.480689	0.423353	0.428183
2.1411	0.230089	0.360705		0.427729	0.39194	0.632304
0.436139	0.309959	0.568067		0.400133	0.463944	0.518503
0.878832	0.166752	0.466196		0.166277	0.489899	0.737396
0.349144	0.170756	0.412847		0.293493	0.558731	0.73717
0.338836	0.29748	0.0974942		0.218904	0.55716	0.708152
0.808043	1.00293	0.733104		0.131797	0.571429	0.375479
0.765962	0.475754	0.798959		0.18155	0.0904855	0.487708
0.714796	0.200356	0.684228		0.327153	0.167368	0.286927
0.251357	0.057577	0.778884		0.261776	0.259297	0.566061
0.233487	0.0931258	0.463793		0.220543	0.230892	0.329521
0.942857	0.36435	0.600208		0.338835	0.173801	0.352678
1.04139	0.501572	-0.218507		0.226223	0.202621	0.188863
0.766047	0.496559	0.368994		0.246377	0.212172	0.280367
0.560645	0.399638	0.484564		0.289258	0.348201	0.167892
0.317502	0.366208	0.546834		0.184162	0.23614	0.265416
	0.378078	0.696716		0.462033	0.322138	0.307669
	0.349352	0.806142		0.245559	0.16273	0.157914
	0.139151	0.44101				0.191874
	0.121865	0.129495				0.210299
	0.123141					0.125397
	0.0956197					-0.0641413
						0.198384

## Sheet: Fig.6G
MDA-MB-453
siScrbl	siBK	siDEC
0.692624	0.0827458	0.116237
0.969833	0.119039	0.0662698
0.812329	0.0922566	0.0444664
1.00842	0.0625167	0.150722
0.79864	0.920482	0.741819
0.801256	0.931803	0.700668
0.952223	0.537978	0.517213
1.11195	0.622533	0.626735
1.24786	0.383073	0.540058
1.11305	0.157155	0.306848
1.27802	0.291027	0.242488
0.713313	0.471432	-0.0720487
0.781165	0.936054	0.863557
0.761396	0.31197	0.633307
0.379335	0.263383	1.11644
0.361315	0.194761	0.175568
0.346144	0.312651	0.634526
0.489297	0.272974	0.494456
0.514948	0.187869	0.596854
0.417872	0.229037
0.543263	0.229517
	0.243563

## Sheet: Fig.6H
	MMTV-PyMT WT																						MMTV-PyMT BK-KO
	ctrl																						ctrl
Time (hours)	Normalized MTT absorbance																					Time (hours)	Normalized MTT absorbance
24	1.061	0.998688	0.995408	0.847819	1.09708	0.849395	0.732855	1.1004	1.22591	1.09144	1.10971	1.2169	0.75662	0.788146	1.12863	0.920792	1.17539	0.903819				24	1.10962	0.797179	0.886449	1.08106	1.12569	0.569582	0.846108	1.2609	1.21882	1.1046	1.09589	1.04207	0.900196	0.978474	0.983366	1.19019	0.903688	0.897592	0.921975	1.08656
48	2.89439	2.796	2.86159	2.8288	3.00918	4.51591	4.19319	3.53877	4.18422	3.95114	2.09962	1.37453	1.7087	2.42749	2.12484	5.1174	5.67751	5.33805	6.74682	6.93352		48	1.52785	1.42251	1.50464	1.96527	1.33146	2.64953	2.55936	2.28885	2.74572	3.01623	1.54599	1.39432	1.82975	1.38943	1.65362	2.38647	2.60591	2.1975	2.3438	2.52057
72	4.08905	3.5938	3.69219	3.79387	4.06281	5.19946	6.50829	7.74541	8.96459	10.0672	4.52869	4.6674	3.21721	6.0104	4.5413	14.1768	10.3239	10.7992	16.1966	15.4498		72	1.63899	1.49259	2.18175	1.96929	1.8211	4.53261	4.65284	5.50045	5.71686	3.82326	3.71942	3.58733	3.48459	4.07167	3.98361	5.80463	4.90247	5.44499	6.02408	6.76775
96	5.05248	5.19023	5.75763	6.37094	5.33126	11.7503	12.4854	13.615	13.9287	13.6419	6.75599	5.81021	6.18852	5.35624	6.22636	19.4257	15.9802	16.7779				96	3.54847	4.10195	4.51437	4.25906	4.43582	6.98978	6.77938	7.34445	7.01984	6.72528	4.54746	4.9682	3.69129	4.73337	4.57192	6.3182	5.93417	6.69003	5.69643	5.81225
	+ PAX																						+ PAX
Time (hours)	Normalized MTT absorbance																					Time (hours)	Normalized MTT absorbance
24	0.885119	0.901915	0.838092	1.25462	1.12026	0.783178	0.805607	0.940187	1.17944	1.29159	0.842839	1.0076	0.969582	1.14068	1.03929	1.35942	1.12754	0.756522	0.756522			24	1.01951	0.96748	0.996748	1.02927	0.986992	0.805607	1.08972	1	0.985047	1.11963	0.864759	1.0013	0.741222	1.19636	1.19636	0.818815	0.869496	1.04688	1.03421	1.2306
48	0.738159	1.07071	1.28569	1.21851	1.02368	2.83178	2.56262	2.36075	3.0785	2.98879	1.68568	1.69835	1.86312	1.65399	1.74905	4.77101	3.73913	2.92754	3.71594	3.75072		48	1.07236	0.991057	1.2187	1.26423	1.2935	2.17383	2.35327	2.06916	1.97944	2.30841	1.71651	1.44343	1.6515	2.06762	2.08713	2.13177	2.32816	2.59424	2.37251	2.23947
72	1.66107	1.94659	2.35976	2.59825	2.49412	3.65607	4.16449	3.79813	3.36449	4.45607	2.59981	3.22085	3.74683	4.17776	3.94328	5.77681	5.84638	6.69275	7.27246	6.98261		72	1.89919	1.90894	2.60163	2.42602	2.64065	4.03738	3.9028	3.95514	3.6785	3.76822	2.45936	3.29811	2.33583	3.07705	2.71294	3.60627	4.04973	3.76465	3.65062	5.39278
96	2.81323	3.15922	3.14243	3.65637	3.75042	5.59065	5.80748	5.91215	6.1215	5.21682	3.33016	4.01458	3.69772	4.92079	4.91445	10.0348	10.8812	11.1942	10.4638	10.1391		96	3.1561	2.94472	3.82927	3.0065	3.09431	5.4785	6.03178	6.88411	6.49533	7.93084	3.41678	4.11899	3.79389	5.04876	5.04226	8.3402	8.11847	7.09851	6.81977	7.07951
	+ IBTX																						+ IBTX
Time (hours)	Normalized MTT absorbance																					Time (hours)	Normalized MTT absorbance
24	1.29809	0.739171	0.962739	0.703366	1.35368	0.942955	0.84375	1.21094	0.945312	1.19949	0.966188	0.83432										24	0.998813	0.745994	1.25519	0.860262	1.03493	1.1048	0.867961	1.05437	1.07767	0.949083	1.20966	0.841258
48	1.23731	1.75151	1.5503	3.05134	3.76326	3.46891	2.64062	3.47656	2.95312	3.82925	4.27557	4.12342										48	1.23472	1.74036	1.98605	1.69287	1.83261	1.61135	1.78252	2.15534	2.46408	2.09135	1.92063	1.9386
72	2.37401	3.03912	2.42152	5.85282	6.83856	6.16771	6.38477	6.47852	7.60352	8.5131	6.41336	7.99577										72	1.81424	2.07774	2.07774	3.1441	3.0393	3.08006	4.18398	5.2966	6.65971	4.21977	3.15949	5.0015
96	5.45925	4.36935	4.66837	11.4301	9.21905	11.9025	8.24609	8.20703	8.56641	14.967	19.2477	19.3998										96	5.47478	4.43501	4.43858	6.62445	6.85735	6.14119	5.41456	5.7699	6.67282	8.43055	7.92288	9.82778

## Sheet: Fig.6I
	MDA-MB-453
	ctrl
Time (hours)	Normalized MTT absorbance
24	1.05441	0.963727	1.05841	0.930388	0.993065	0.995904	0.965188	1.02048	0.991809	1.02662	0.840243	1.10475	0.940091	0.938339	1.17657	1.14065	1.15031	0.944901	0.838569	0.925568
48	1.11931	1.03796	1.10864	1.21666	1.34068	2.05119	2.16382	2.15768	1.87918	2.01843	1.21453	1.74705	1.37393	1.05337	1.23555	1.24698	1.29048	1.1189	1.15756	1.30498
72	1.78654	1.83722	1.62384	1.60917	1.78787	2.20614	2.30444	2.32901	2.58294	2.32921	2.57445	2.90728	2.67254	2.58496	2.57693	2.78718	3.01434
96	2.73071	2.80805	2.46266	2.56134	2.3213	3.5843	3.82799	3.90171	3.7727	3.66007	2.80217	2.43256	1.63027	2.67605	2.6813	2.33204	3.01112	2.88787	2.18946	2.02997
	+ PAX
Time (hours)	Normalized MTT absorbance
24	1	0.844717	1.09285	1.02721	1.03522	1.08936	1.06209	0.934135	0.820864	1.09355	0.908843	1.12141	0.964028	0.919063	1.08666	0.993601	0.900524	1.05876	1.04712
48	1.56937	1.53735	1.68943	1.2524	1.45411	1.98154	2.1074	1.93749	1.76549	2.12628	1.18204	1.29445	1.27197	1.0451	1.24949	1.22397	1.31239	1.43572	1.54043	1.54974
72	1.61473	1.44504	1.82924	1.72359	1.49306	1.61166	2.48427	2.27451	2.14026	1.78786	1.43003	2.10042	1.37689	1.89808	1.88377	2.00194	2.22998	2.44871	2.21834	2.05779
96	1.68356	1.77962	1.67716	1.52988	1.32978	2.13606	2.09202	2.4591	2.61642	2.47588	1.77545	2.05137	1.43616	2.19035	2.12699	2.53869	2.11751	2.03141	1.95462	2.06632
	+ IBTX
Time (hours)	Normalized MTT absorbance
24	1.03423	1.14885	0.941589	0.943159	0.932168	0.982544	1.01428	0.917085	1.07776	1.00833	0.948276	0.887996	0.979388	0.989111	1.19523	1.01215	0.99865	1.00765	0.97166	1.0099
48	1.54716	1.4027	1.38386	1.40741	1.98096	2.09799	1.95914	2.04443	2.62563	1.28597	1.40848	1.3307	1.21597	1.32097	1.45074	1.52272	1.62393	1.38552	1.45299
72	2.05328	2.11923	2.27939	1.90568	1.86525	1.89698	2.14097	1.90887	2.42027	2.05276	2.22193	1.82331	2.44339	2.39616	2.78078	2.16449
96	2.31079	2.34063	2.29509	2.27154	2.18659	2.84118	2.42859	2.53174	2.2699	2.35805	2.75473	2.39694	2.74501	3.37832	2.68781	2.73279	2.40441	2.33243

## Sheet: Fig.6J
MMTV-PyMT WT			MMTV-PyMT BK-KO
ctrl	-O2		ctrl	-O2
1.04348	1.16522		0.943396	0.754717
0.956522	1.04348		1.0566	0.918239
0.911765	1.01961		0.962428	0.858382
1.02941	0.941176		0.962428	0.884393
1.05882	0.882353		1.07514	0.893064
1.01205	1.04819		0.907216	0.701031
1.03614	1.04217		1.24742	0.783505
0.951807	1.01807		0.845361	0.752577
0.991416	1.17811		1.09932	0.821918
0.997854	1.11373		0.883562	0.955479
1.01073	1.21674		1.01712	0.832192

## Sheet: Fig.6K
Log2 expression counts
BKCa	BKCa-DEC
9.79	6.42
9.82	6.63
11.02	7.14
10.81	7.92
10.79	7.26
11.25	7.4
8.59	5.65
10.43	6.29
8.3	6.2
9.56	5.51
10.03	5.2
11.9	5.45
10.47	5.11
12.66	5.21
11.64	5.35
10.91	5.21
10.65	5.37
8.32	5.15
10.01	5.25
8.88	1.9
10.32	3.31
8.53	3.7
9.76	3.77
8.62	3.83
10.72	4.83
8.75	4.14
9.92	3.77
9.8	3.49
9.6	4.43
8.28	3.82
9.01	4.66
9.44	3.52
7.73	2.24
7.46	3.97
7.82	4.62
7.65	3.62
8.67	2.41
7.9	4.07
8.75	2.65
8.18	4.16
10.8	3.98
9.25	3.96
7.46	3.57
6.6	4.01
9.63	4.23
10.04	4.32
9.35	3.17
8.47	3.33
10.21	4.28
9.05	3.76
7.91	3.57
8.77	3.97
8.91	2.19
8.45	3.74
10.36	3.69
7.53	3.57
9.01	3.2
9	4.52
10.24	3.22
8.67	3.74
8.83	3.67
8.37	4.13
8.69	3.59
9.42	3.19
9.74	3.72
9.01	3.84
10.04	4.19
8.43	3.13
8.61	3.83
11.09	4.13
8.79	2.82
10.31	4.2
8.6	4.16
10.04	4.3
10.1	3.86
10.98	4.32
9.26	3.59
8.47	3.96
9.47	3.96
8.13	2.66
8.75	2.87
9.79	2.76
9.73	3.73
9.63	2.71
7.7	3.49
11.17	4.84
8.17	4.25
10.12	4.29
8.33	3.42
6.83	3.78
8.84	3.06
9.41	2.55
8.52	3.95
8.61	3.53
10.39	2.95
10.16	3.11
8.75	4.03
7.44	3.42
10.02	2.64
10.49	3.05
9.88	2.66
9.03	3.16
10.64	3.4
8.56	4
8.84	3.28
8.02	3.65
9.06	4.22
8.3	3.58
8.9	3.76
9.72	2.97
9.97	4.36
9.38	3.66
8.48	3.2
7.68	4.23
8.46	4.34
8.14	4.58
8.82	4.17
10.83	3.68
8.53	3.94
8.09	4
7.58	2.71
8.59	4.26
6.4	4.08
7.79	3.35
6.92	4.59
8.26	3.33
6.46	2.02
11.91	3.29
8	3.49
8.14	2.66
10.06	3.5
9.1	3.74
7.26	4.12
8.97	3.95
8.57	2.8
9.1	4.18
8.33	3.93
11.19	4.5
9.35	4.56
9.49	3.45
7.92	3.36
9.35	3.84
10.17	3.33
9.79	4.26
8.69	3.36
9.76	3.52
8.86	3.31
10.07	2.9
11.11	2.93
8.12	3.62
8.62	4.14
9.71	3.74
8.98	2.65
9.63	2.9
8.9	3.5
9.31	3.94
8.22	3.88
9.03	3.96
9.64	4.15
9.79	3.78
10.08	4.77
10.1	4.41
7.65	4.24
8.9	3.43
9.86	5.08
8.38	3.41
9.33	4.56
10.32	3.55
7.99	2.77
10.04	4.4
6.6	4.01
10.16	4.45
9.46	3.86
9.96	3.1
8.69	3.59
9.39	3.48
8.26	3.34
7.86	2.28
7.98	3.29
8.59	3.83
8.91	4.32
7.38	2.72
8.6	3.45
8.75	3.77
8.58	3.94
7.55	2.96
8.9	4.38
10.68	4.01
9.06	3.67
8.63	3.59
9.84	4.73
7.84	4.39
9.59	4.05
9.39	4.47
9.72	3.48
9.31	3.24
9.96	3.69
9.34	4.03
9.39	4.98
9.08	3.32
10.38	4.33
10.37	4.06
10.17	3.14
10.64	4.27
10.88	4.39
10.17	3.28
8.43	2.97
11.24	3.58
8.16	4.39
10.47	5.03
8.57	3.97
8.88	3.99
8.68	4.72
10.43	3.17
8.75	2.97
8.58	3.79
8.99	3.87
8.06	3.28
7.93	3.93
9.77	3.7
8.92	2.87
9.45	4.3
8.06	3.89
8.31	3.59
9.45	3.44
10.21	3.64
10.11	2.34
9.21	3.02
9.78	3.72
9.92	4.82
7.3	3.22
9.48	3.85
8.83	3.59
9.67	3.24
8.47	4.3
9.45	2.61
8.69	3.36
8.45	3.35
9.54	3.76
8.19	3.17
9.08	4.05
8.6	3.62
7.03	4.24
7.99	3.35
10.08	4.79
8.91	4.72
8.83	4.04
8.23	4.31
7.33	2.73
10.34	3.9
7.75	3.9
8.56	3.09
8.97	3.49
8.99	4.15
10.22	4.17
9.77	3.57
8.21	4.18
8.62	2.68
8.78	4
8.38	3.79
9.91	3.33
10.05	3.23
9.41	2.83
7.98	4.15
10.25	4.61
11.03	3.16
10.4	3.32
9.23	2.51
9.23	2.04
7.33	3.58
10.43	3.89
9.55	4.07
11.26	3.24
8.49	3.97
11.47	3.63
9.38	0.45
8.71	3.62
8.32	3.7
8.33	3.29
10.82	3.37
10.1	1.32
8.25	3.87
8.82	3.42
10.67	3.41
9.53	3.66
8.84	3.13
9.39	3.46
9.53	4.49
8.12	4.88
9.4	3.76
9.75	3.81
10.06	3.37
10.07	4.67
9.92	3.21
6.63	4.45
8.29	4.09
9.04	3.9
10.2	3.97
8.5	3.65
8.11	3.74
7.94	3.91
10.19	4.03
8.41	4.08
7.53	2.62
9.42	4.43
7	3.66
9.44	3.97
8.78	2.19
10.34	3.86
9.31	3.3
11.26	3.5
9.97	3.84
9.78	3.98
10.33	3.9
8.3	2.86
6.96	2.13
7.6	2.32
7.68	4.46
9.28	3.64
8.07	3.08
8.29	3.14
8.47	2.95
7.97	3.43
10.26	4.67
9.87	4.01
9.39	3.09
10.04	4.08
9.7	3.45
9.72	3.99
9.14	4.93
9.69	3.29
7.78	4.48
8.87	3.33
8.96	3.03
8.81	3.86
9.05	3.92
9.57	3.47
10.17	2.54
10.22	3.93
10.4	3.42
9	3.35
10.79	2.65
10.2	3.92
11.3	3.42
8.56	4.59
9.32	3.68
8.76	4.05
11.13	4.26
10.22	4.03
8.85	3.42
10.51	3.36
8.41	4.11
7.75	3.29
10.55	3.58
12.02	3.71
9.48	3.22
8.89	3.96
8.94	4.21
8.81	3.6
9.24	2.58
9.38	3.61
8.03	4.14
8.17	3.11
6.75	4.18
8.76	3.38
9.51	3.6
10.42	3.28
10.1	3.53
9.53	4
8.1	3.66
9.26	3.6
9.45	3.58
8.1	3.21
9.67	4.46
10.04	3.27
10.06	4.19
10.33	2.68
7.07	5.01
8.36	3.81
9.96	2.69
10.09	3.65
8.75	3.83
9.12	2.88
7.28	3.44
9.97	3.76
9.56	4.18
8.55	3.68
7.72	3.79
10.06	4.41
9.83	3.16
7.96	4.57
8.49	3.83
9.1	3.89
8.13	2.84
8.27	4.17
10.05	4.48
9.85	2.86
8.26	4.19
8.88	2.65
9.51	3.64
10.8	3.1
8.19	2.88
10.69	3.74
9.61	3.52
6.57	3.08
9.54	3.52
10.27	3.72
8.93	3.81
8.6	3.38
9.76	2.84
9.34	3.91
9.92	3.38
7.79	4.62
9.45	3.56
8.92	4.17
8.73	3.76
11.12	3.57
9.33	3.55
8.29	4.06
8.15	3.76
10.48	3.03
10.21	3.78
8.68	3.26
10.03	2.39
9.71	3.71
7.57	4.16
8.02	3.5
11.43	3.73
9.63	4.27
11.25	2.35
11.4	4.37
9.7	2.4
10.89	4.33
9.48	3.92
8.36	3.99
10.24	3.91
7.07	3.77
9.79	2.99
8.44	4.84
9.16	2.87
9.5	3.57
8.42	3.89
8.99	3.64
9.06	4.46
7.97	4.35
8.96	3.6
10.57	4.04
8.87	4.83
9.88	4.27
7.64	3.57
7.85	3.45
8.05	3.36
9.72	4.42
8.98	3.2
8.52	3.68
8.49	2.95
9.69	3.02
8.68	4.51
9.34	3.47
9.87	4.31
8.63	2.88
8.25	3.18
10.79	3.74
7.99	5.03
8.24	3.7
9.35	3.5
10.58	3.42
9.16	3.83
8.66	2.59
11.86	4.13
9.6	3.45
8.72	4.24
9.77	3.1
8.73	3.96
8.75	4.62
6.31	3.84
10.27	4.56
9.3	3.6
8.96	2.96
8.15	3.02
9.48	3.47
8.71	3.34
8.37	3.4
8.39	2.67
9.36	2.77
8.51	2.76
8.73	3.37
9.95	2.04
8.43	4.59
8.24	4.48
11.02	3.79
10.24	2.92
8.49	3.35
8.92	4.5
8.39	4.87
7.79	3.65
10.75	3.78
9.91	3.77
8.65	4.05
7.92	4.25
7.76	3.6
9.88	3.09
7.69	3.58
10.79	3.92
9.21	3.75
8.91	3.27
9.9	3.08
8.75	2.88
7.58	4.04
10.86	3.28
7.81	3.43
8.91	3.69
7.48	3.22
9.84	3.36
8.95	3.03
9.39	3.86
9.83	3.8
8.13	2.84
7.99	3.67
10.47	4.3
9.77	2.7
9.86	4.43
9.79	4.27
9.64	4.77
9.41	4.35
10.19	4.71
9.24	4.07
7.91	3.9
9.01	3.81
8.99	3.61
8.49	4.02
9.8	2.92
8.93	3.16
9.47	3.68
8.12	4.01
9.11	3.8
10.63	3.83
8.8	3.77
8.44	3.28
9.29	3.4
10.74	3.15
9.98	3.63
9.7	4.48
9.5	3.83
7.99	4.21
9.36	4.79
9.54	4.02
8.28	3.65
8.44	3.13
8.92	3.94
6.75	3.31

## Sheet: Fig.6L
Log2 expression counts
BKCa	BKCa-DEC negative	BKCa-DEC positive
9.79		6.42
9.82		6.63
11.02		7.14
10.81		7.92
10.79		7.26
11.25		7.4
8.59		5.65
10.43		6.29
8.3		6.2
9.56		5.51
10.03	5.2
11.9	5.45
10.47	5.11
12.66	5.21
11.64	5.35
10.91	5.21
10.65	5.37
8.32	5.15
10.01	5.25
8.88	1.9
10.32	3.31
8.53	3.7
9.76	3.77
8.62	3.83
10.72	4.83
8.75	4.14
9.92	3.77
9.8	3.49
9.6	4.43
8.28	3.82
9.01	4.66
9.44	3.52
7.73	2.24
7.46	3.97
7.82	4.62
7.65	3.62
8.67	2.41
7.9	4.07
8.75	2.65
8.18	4.16
10.8	3.98
9.25	3.96
7.46	3.57
6.6	4.01
9.63	4.23
10.04	4.32
9.35	3.17
8.47	3.33
10.21	4.28
9.05	3.76
7.91	3.57
8.77	3.97
8.91	2.19
8.45	3.74
10.36	3.69
7.53	3.57
9.01	3.2
9	4.52
10.24	3.22
8.67	3.74
8.83	3.67
8.37	4.13
8.69	3.59
9.42	3.19
9.74	3.72
9.01	3.84
10.04	4.19
8.43	3.13
8.61	3.83
11.09	4.13
8.79	2.82
10.31	4.2
8.6	4.16
10.04	4.3
10.1	3.86
10.98	4.32
9.26	3.59
8.47	3.96
9.47	3.96
8.13	2.66
8.75	2.87
9.79	2.76
9.73	3.73
9.63	2.71
7.7	3.49
11.17	4.84
8.17	4.25
10.12	4.29
8.33	3.42
6.83	3.78
8.84	3.06
9.41	2.55
8.52	3.95
8.61	3.53
10.39	2.95
10.16	3.11
8.75	4.03
7.44	3.42
10.02	2.64
10.49	3.05
9.88	2.66
9.03	3.16
10.64	3.4
8.56	4
8.84	3.28
8.02	3.65
9.06	4.22
8.3	3.58
8.9	3.76
9.72	2.97
9.97	4.36
9.38	3.66
8.48	3.2
7.68	4.23
8.46	4.34
8.14	4.58
8.82	4.17
10.83	3.68
8.53	3.94
8.09	4
7.58	2.71
8.59	4.26
6.4	4.08
7.79	3.35
6.92	4.59
8.26	3.33
6.46	2.02
11.91	3.29
8	3.49
8.14	2.66
10.06	3.5
9.1	3.74
7.26	4.12
8.97	3.95
8.57	2.8
9.1	4.18
8.33	3.93
11.19	4.5
9.35	4.56
9.49	3.45
7.92	3.36
9.35	3.84
10.17	3.33
9.79	4.26
8.69	3.36
9.76	3.52
8.86	3.31
10.07	2.9
11.11	2.93
8.12	3.62
8.62	4.14
9.71	3.74
8.98	2.65
9.63	2.9
8.9	3.5
9.31	3.94
8.22	3.88
9.03	3.96
9.64	4.15
9.79	3.78
10.08	4.77
10.1	4.41
7.65	4.24
8.9	3.43
9.86	5.08
8.38	3.41
9.33	4.56
10.32	3.55
7.99	2.77
10.04	4.4
6.6	4.01
10.16	4.45
9.46	3.86
9.96	3.1
8.69	3.59
9.39	3.48
8.26	3.34
7.86	2.28
7.98	3.29
8.59	3.83
8.91	4.32
7.38	2.72
8.6	3.45
8.75	3.77
8.58	3.94
7.55	2.96
8.9	4.38
10.68	4.01
9.06	3.67
8.63	3.59
9.84	4.73
7.84	4.39
9.59	4.05
9.39	4.47
9.72	3.48
9.31	3.24
9.96	3.69
9.34	4.03
9.39	4.98
9.08	3.32
10.38	4.33
10.37	4.06
10.17	3.14
10.64	4.27
10.88	4.39
10.17	3.28
8.43	2.97
11.24	3.58
8.16	4.39
10.47	5.03
8.57	3.97
8.88	3.99
8.68	4.72
10.43	3.17
8.75	2.97
8.58	3.79
8.99	3.87
8.06	3.28
7.93	3.93
9.77	3.7
8.92	2.87
9.45	4.3
8.06	3.89
8.31	3.59
9.45	3.44
10.21	3.64
10.11	2.34
9.21	3.02
9.78	3.72
9.92	4.82
7.3	3.22
9.48	3.85
8.83	3.59
9.67	3.24
8.47	4.3
9.45	2.61
8.69	3.36
8.45	3.35
9.54	3.76
8.19	3.17
9.08	4.05
8.6	3.62
7.03	4.24
7.99	3.35
10.08	4.79
8.91	4.72
8.83	4.04
8.23	4.31
7.33	2.73
10.34	3.9
7.75	3.9
8.56	3.09
8.97	3.49
8.99	4.15
10.22	4.17
9.77	3.57
8.21	4.18
8.62	2.68
8.78	4
8.38	3.79
9.91	3.33
10.05	3.23
9.41	2.83
7.98	4.15
10.25	4.61
11.03	3.16
10.4	3.32
9.23	2.51
9.23	2.04
7.33	3.58
10.43	3.89
9.55	4.07
11.26	3.24
8.49	3.97
11.47	3.63
9.38	0.45
8.71	3.62
8.32	3.7
8.33	3.29
10.82	3.37
10.1	1.32
8.25	3.87
8.82	3.42
10.67	3.41
9.53	3.66
8.84	3.13
9.39	3.46
9.53	4.49
8.12	4.88
9.4	3.76
9.75	3.81
10.06	3.37
10.07	4.67
9.92	3.21
6.63	4.45
8.29	4.09
9.04	3.9
10.2	3.97
8.5	3.65
8.11	3.74
7.94	3.91
10.19	4.03
8.41	4.08
7.53	2.62
9.42	4.43
7	3.66
9.44	3.97
8.78	2.19
10.34	3.86
9.31	3.3
11.26	3.5
9.97	3.84
9.78	3.98
10.33	3.9
8.3	2.86
6.96	2.13
7.6	2.32
7.68	4.46
9.28	3.64
8.07	3.08
8.29	3.14
8.47	2.95
7.97	3.43
10.26	4.67
9.87	4.01
9.39	3.09
10.04	4.08
9.7	3.45
9.72	3.99
9.14	4.93
9.69	3.29
7.78	4.48
8.87	3.33
8.96	3.03
8.81	3.86
9.05	3.92
9.57	3.47
10.17	2.54
10.22	3.93
10.4	3.42
9	3.35
10.79	2.65
10.2	3.92
11.3	3.42
8.56	4.59
9.32	3.68
8.76	4.05
11.13	4.26
10.22	4.03
8.85	3.42
10.51	3.36
8.41	4.11
7.75	3.29
10.55	3.58
12.02	3.71
9.48	3.22
8.89	3.96
8.94	4.21
8.81	3.6
9.24	2.58
9.38	3.61
8.03	4.14
8.17	3.11
6.75	4.18
8.76	3.38
9.51	3.6
10.42	3.28
10.1	3.53
9.53	4
8.1	3.66
9.26	3.6
9.45	3.58
8.1	3.21
9.67	4.46
10.04	3.27
10.06	4.19
10.33	2.68
7.07	5.01
8.36	3.81
9.96	2.69
10.09	3.65
8.75	3.83
9.12	2.88
7.28	3.44
9.97	3.76
9.56	4.18
8.55	3.68
7.72	3.79
10.06	4.41
9.83	3.16
7.96	4.57
8.49	3.83
9.1	3.89
8.13	2.84
8.27	4.17
10.05	4.48
9.85	2.86
8.26	4.19
8.88	2.65
9.51	3.64
10.8	3.1
8.19	2.88
10.69	3.74
9.61	3.52
6.57	3.08
9.54	3.52
10.27	3.72
8.93	3.81
8.6	3.38
9.76	2.84
9.34	3.91
9.92	3.38
7.79	4.62
9.45	3.56
8.92	4.17
8.73	3.76
11.12	3.57
9.33	3.55
8.29	4.06
8.15	3.76
10.48	3.03
10.21	3.78
8.68	3.26
10.03	2.39
9.71	3.71
7.57	4.16
8.02	3.5
11.43	3.73
9.63	4.27
11.25	2.35
11.4	4.37
9.7	2.4
10.89	4.33
9.48	3.92
8.36	3.99
10.24	3.91
7.07	3.77
9.79	2.99
8.44	4.84
9.16	2.87
9.5	3.57
8.42	3.89
8.99	3.64
9.06	4.46
7.97	4.35
8.96	3.6
10.57	4.04
8.87	4.83
9.88	4.27
7.64	3.57
7.85	3.45
8.05	3.36
9.72	4.42
8.98	3.2
8.52	3.68
8.49	2.95
9.69	3.02
8.68	4.51
9.34	3.47
9.87	4.31
8.63	2.88
8.25	3.18
10.79	3.74
7.99	5.03
8.24	3.7
9.35	3.5
10.58	3.42
9.16	3.83
8.66	2.59
11.86	4.13
9.6	3.45
8.72	4.24
9.77	3.1
8.73	3.96
8.75	4.62
6.31	3.84
10.27	4.56
9.3	3.6
8.96	2.96
8.15	3.02
9.48	3.47
8.71	3.34
8.37	3.4
8.39	2.67
9.36	2.77
8.51	2.76
8.73	3.37
9.95	2.04
8.43	4.59
8.24	4.48
11.02	3.79
10.24	2.92
8.49	3.35
8.92	4.5
8.39	4.87
7.79	3.65
10.75	3.78
9.91	3.77
8.65	4.05
7.92	4.25
7.76	3.6
9.88	3.09
7.69	3.58
10.79	3.92
9.21	3.75
8.91	3.27
9.9	3.08
8.75	2.88
7.58	4.04
10.86	3.28
7.81	3.43
8.91	3.69
7.48	3.22
9.84	3.36
8.95	3.03
9.39	3.86
9.83	3.8
8.13	2.84
7.99	3.67
10.47	4.3
9.77	2.7
9.86	4.43
9.79	4.27
9.64	4.77
9.41	4.35
10.19	4.71
9.24	4.07
7.91	3.9
9.01	3.81
8.99	3.61
8.49	4.02
9.8	2.92
8.93	3.16
9.47	3.68
8.12	4.01
9.11	3.8
10.63	3.83
8.8	3.77
8.44	3.28
9.29	3.4
10.74	3.15
9.98	3.63
9.7	4.48
9.5	3.83
7.99	4.21
9.36	4.79
9.54	4.02
8.28	3.65
8.44	3.13
8.92	3.94
6.75	3.31

[truncated: 1 more sheets: Fig.6M]
